# Supplementary material
Source: PubMed Central journal article supplement (PMC3255083)
Supplement: NIHMS77189-supplement-01.pdf [file NIHMS77189-supplement-01.pdf]

| SSP | 20040531A | 20040531B | 20040531C | 20040531D | 4mon           | 20040531F | 20040531G |
|-----|-----------|-----------|-----------|-----------|----------------|-----------|-----------|
| 4   | 1790      | 326       | 2349      | 1674      | <b>1534.5</b>  | 1399      | 1108      |
| 5   | 2317      | 69        | 1436      | 600       | <b>1105.2</b>  | 554       | 271       |
| 8   | 112       | 55        | 157       | 182       | <b>126.3</b>   | 141       | 79        |
| 9   | 1414      | 95        | 597       | 1126      | <b>808.0</b>   | 351       | 68        |
| 10  | 90        | 54        | 203       | 298       | <b>161.5</b>   | 286       | 204       |
| 11  | 399       | 60        | 279       | 206       | <b>235.9</b>   | 107       | 70        |
| 12  | 808       | 55        | 479       | 619       | <b>490.2</b>   | 72        | 70        |
| 14  | 481       | 0         | 179       | 482       | <b>285.6</b>   | 59        | 6         |
| 17  | 426       | 0         | 289       | 383       | <b>274.5</b>   | 270       | 329       |
| 18  | 0         | 0         | 0         | 0         | <b>0.0</b>     | 0         | 0         |
| 19  | 14        | 0         | 49        | 0         | <b>15.7</b>    | 12        | 0         |
| 23  | 0         | 0         | 0         | 0         | <b>0.0</b>     | 0         | 0         |
| 102 | 0         | 0         | 2422      | 1735      | <b>1039.1</b>  | 1678      | 1957      |
| 104 | 0         | 0         | 202       | 201       | <b>100.8</b>   | 212       | 115       |
| 108 | 1985      | 3406      | 2266      | 1597      | <b>2313.5</b>  | 1833      | 2501      |
| 111 | 28390     | 20648     | 19445     | 21467     | <b>22487.7</b> | 14315     | 12291     |
| 112 | 169       | 0         | 316       | 280       | <b>191.2</b>   | 64        | 29        |
| 113 | 253       | 0         | 247       | 182       | <b>170.3</b>   | 144       | 197       |
| 114 | 84        | 0         | 66        | 102       | <b>63.1</b>    | 57        | 52        |
| 115 | 137       | 77        | 126       | 376       | <b>178.9</b>   | 55        | 50        |
| 116 | 351       | 112       | 243       | 222       | <b>231.8</b>   | 41        | 85        |
| 117 | 9         | 0         | 46        | 66        | <b>30.3</b>    | 45        | 0         |
| 118 | 0         | 0         | 0         | 0         | <b>0.0</b>     | 15        | 0         |
| 119 | 0         | 0         | 41        | 104       | <b>36.2</b>    | 35        | 10        |
| 120 | 0         | 0         | 0         | 0         | <b>0.0</b>     | 0         | 0         |
| 201 | 146       | 0         | 102       | 270       | <b>129.4</b>   | 161       | 20        |
| 202 | 73        | 22        | 46        | 38        | <b>45.0</b>    | 14        | 26        |
| 203 | 141       | 56        | 161       | 177       | <b>133.6</b>   | 32        | 8         |
| 204 | 110       | 230       | 170       | 67        | <b>144.2</b>   | 71        | 57        |
| 205 | 1737      | 1461      | 2071      | 2222      | <b>1872.7</b>  | 1985      | 1322      |
| 206 | 97        | 82        | 142       | 199       | <b>129.9</b>   | 136       | 123       |
| 209 | 33        | 169       | 234       | 145       | <b>145.2</b>   | 63        | 56        |
| 210 | 199       | 356       | 567       | 231       | <b>338.3</b>   | 0         | 217       |
| 211 | 74        | 49        | 59        | 47        | <b>57.3</b>    | 0         | 0         |
| 213 | 2         | 15        | 7         | 28        | <b>12.9</b>    | 10        | 10        |
| 301 | 156       | 0         | 0         | 27        | <b>45.8</b>    | 0         | 0         |
| 306 | 151       | 214       | 608       | 77        | <b>262.5</b>   | 293       | 76        |
| 308 | 85        | 0         | 138       | 154       | <b>94.1</b>    | 199       | 27        |
| 311 | 34608     | 17959     | 20235     | 11986     | <b>21197.0</b> | 15890     | 14572     |
| 312 | 0         | 0         | 11        | 0         | <b>2.8</b>     | 87        | 28        |
| 314 | 203       | 0         | 374       | 447       | <b>256.0</b>   | 153       | 0         |
| 317 | 95        | 55        | 45        | 0         | <b>48.8</b>    | 0         | 0         |
| 319 | 81        | 24        | 99        | 47        | <b>62.6</b>    | 63        | 14        |
| 320 | 0         | 113       | 347       | 658       | <b>279.3</b>   | 294       | 0         |
| 322 | 9         | 0         | 48        | 14        | <b>17.7</b>    | 15        | 0         |
| 323 | 51        | 0         | 0         | 18        | <b>17.4</b>    | 14        | 0         |
| 324 | 45        | 84        | 80        | 69        | <b>69.3</b>    | 0         | 56        |
| 325 | 6788      | 0         | 7432      | 0         | <b>3554.9</b>  | 0         | 0         |
| 405 | 0         | 43        | 38        | 28        | <b>27.2</b>    | 5         | 30        |
| 406 | 15        | 41        | 35        | 70        | <b>40.3</b>    | 33        | 17        |
| 511 | 72        | 0         | 161       | 310       | <b>135.7</b>   | 0         | 0         |

|      |       |       |       |       |         |       |       |
|------|-------|-------|-------|-------|---------|-------|-------|
| 512  | 10    | 30    | 41    | 61    | 35.6    | 27    | 37    |
| 514  | 105   | 175   | 168   | 313   | 190.0   | 35    | 190   |
| 516  | 122   | 314   | 223   | 306   | 241.2   | 131   | 40    |
| 517  | 261   | 246   | 313   | 435   | 313.5   | 158   | 159   |
| 518  | 212   | 346   | 276   | 256   | 272.6   | 72    | 45    |
| 519  | 30    | 108   | 98    | 86    | 80.3    | 153   | 0     |
| 520  | 30    | 192   | 419   | 107   | 187.0   | 114   | 111   |
| 521  | 240   | 907   | 871   | 450   | 617.0   | 403   | 464   |
| 603  | 293   | 478   | 222   | 377   | 342.6   | 588   | 264   |
| 604  | 0     | 78    | 60    | 19    | 39.1    | 31    | 25    |
| 706  | 0     | 0     | 0     | 40    | 10.1    | 54    | 0     |
| 708  | 0     | 0     | 8     | 7     | 3.9     | 12    | 4     |
| 716  | 0     | 0     | 5     | 29    | 8.6     | 0     | 0     |
| 1003 | 2037  | 1948  | 1669  | 423   | 1519.5  | 1900  | 2228  |
| 1004 | 0     | 0     | 36    | 75    | 27.7    | 44    | 118   |
| 1005 | 195   | 64    | 171   | 148   | 144.6   | 169   | 206   |
| 1006 | 249   | 141   | 235   | 327   | 237.9   | 308   | 64    |
| 1007 | 466   | 229   | 539   | 534   | 442.2   | 473   | 605   |
| 1008 | 635   | 109   | 173   | 298   | 303.8   | 64    | 10    |
| 1010 | 0     | 0     | 0     | 0     | 0.0     | 1096  | 0     |
| 1012 | 0     | 0     | 0     | 0     | 0.0     | 5     | 0     |
| 1103 | 0     | 167   | 49    | 93    | 77.2    | 75    | 0     |
| 1108 | 0     | 0     | 0     | 0     | 0.0     | 0     | 0     |
| 1110 | 0     | 0     | 48    | 254   | 75.5    | 90    | 35    |
| 1111 | 0     | 0     | 0     | 0     | 0.0     | 49    | 86    |
| 1112 | 814   | 683   | 844   | 632   | 743.3   | 582   | 717   |
| 1114 | 0     | 0     | 32    | 0     | 8.1     | 0     | 0     |
| 1115 | 0     | 0     | 0     | 18    | 4.6     | 84    | 157   |
| 1116 | 0     | 0     | 72    | 95    | 41.7    | 0     | 106   |
| 1117 | 3     | 0     | 173   | 82    | 64.7    | 39    | 47    |
| 1118 | 0     | 0     | 29    | 3     | 8.0     | 43    | 20    |
| 1119 | 0     | 0     | 0     | 0     | 0.0     | 1     | 0     |
| 1120 | 0     | 0     | 0     | 0     | 0.0     | 0     | 0     |
| 1122 | 6     | 0     | 33    | 46    | 21.2    | 41    | 12    |
| 1123 | 0     | 0     | 45    | 52    | 24.2    | 0     | 0     |
| 1124 | 60    | 20    | 37    | 76    | 48.1    | 22    | 3     |
| 1202 | 364   | 231   | 454   | 315   | 341.0   | 297   | 120   |
| 1203 | 1636  | 3227  | 1990  | 1538  | 2097.7  | 352   | 4624  |
| 1205 | 0     | 0     | 106   | 0     | 26.5    | 0     | 75    |
| 1206 | 23441 | 45144 | 25366 | 16823 | 27693.5 | 23784 | 35097 |
| 1208 | 0     | 0     | 0     | 304   | 76.0    | 0     | 0     |
| 1209 | 249   | 286   | 208   | 151   | 223.5   | 141   | 268   |
| 1210 | 1008  | 237   | 348   | 442   | 508.8   | 206   | 361   |
| 1211 | 229   | 45    | 43    | 94    | 103.0   | 233   | 323   |
| 1212 | 17    | 0     | 0     | 0     | 4.3     | 0     | 427   |
| 1213 | 51    | 0     | 73    | 153   | 69.4    | 51    | 0     |
| 1214 | 251   | 0     | 884   | 494   | 407.1   | 0     | 0     |
| 1301 | 53    | 52    | 0     | 0     | 26.1    | 85    | 0     |
| 1302 | 111   | 1042  | 1160  | 343   | 663.9   | 413   | 552   |
| 1303 | 164   | 0     | 0     | 81    | 61.2    | 0     | 0     |
| 1304 | 294   | 184   | 0     | 1091  | 392.0   | 899   | 48    |
| 1305 | 99    | 55    | 25    | 40    | 54.8    | 156   | 201   |

|             |      |      |      |      |               |      |      |
|-------------|------|------|------|------|---------------|------|------|
| 1306        | 49   | 14   | 23   | 9    | <b>23.5</b>   | 32   | 42   |
| 1307        | 43   | 0    | 0    | 94   | <b>34.2</b>   | 104  | 0    |
| 1402        | 0    | 56   | 38   | 18   | <b>28.1</b>   | 74   | 66   |
| 1403        | 0    | 0    | 0    | 108  | <b>27.0</b>   | 2    | 0    |
| 1405        | 34   | 41   | 13   | 81   | <b>42.4</b>   | 143  | 113  |
| 1406        | 210  | 80   | 0    | 347  | <b>159.3</b>  | 725  | 158  |
| 1407        | 65   | 32   | 0    | 90   | <b>46.7</b>   | 131  | 0    |
| <b>1408</b> | 108  | 26   | 47   | 138  | <b>79.8</b>   | 163  | 145  |
| 1409        | 18   | 7    | 13   | 16   | <b>13.5</b>   | 3    | 32   |
| 1410        | 29   | 12   | 24   | 19   | <b>20.8</b>   | 25   | 8    |
| 1412        | 73   | 32   | 24   | 77   | <b>51.3</b>   | 0    | 10   |
| 1413        | 38   | 0    | 0    | 45   | <b>20.7</b>   | 102  | 0    |
| 1414        | 0    | 6    | 34   | 0    | <b>10.2</b>   | 13   | 0    |
| 1501        | 147  | 151  | 306  | 139  | <b>185.8</b>  | 45   | 162  |
| 1502        | 330  | 198  | 202  | 372  | <b>275.4</b>  | 196  | 214  |
| <b>1503</b> | 2643 | 1958 | 1677 | 1973 | <b>2062.6</b> | 2026 | 1247 |
| 1504        | 0    | 0    | 0    | 226  | <b>56.5</b>   | 189  | 0    |
| 1505        | 0    | 0    | 0    | 0    | <b>0.0</b>    | 0    | 0    |
| 1506        | 90   | 49   | 52   | 145  | <b>83.9</b>   | 67   | 25   |
| <b>1507</b> | 121  | 163  | 246  | 406  | <b>233.7</b>  | 318  | 123  |
| 1508        | 50   | 156  | 180  | 243  | <b>157.1</b>  | 115  | 139  |
| 1509        | 51   | 53   | 103  | 67   | <b>68.6</b>   | 48   | 38   |
| 1510        | 972  | 389  | 705  | 1600 | <b>916.6</b>  | 2222 | 828  |
| 1511        | 0    | 0    | 0    | 0    | <b>0.0</b>    | 360  | 0    |
| 1512        | 3372 | 1066 | 770  | 3731 | <b>2234.9</b> | 5682 | 1286 |
| 1513        | 0    | 0    | 0    | 0    | <b>0.0</b>    | 0    | 0    |
| 1514        | 102  | 0    | 0    | 31   | <b>33.2</b>   | 86   | 0    |
| 1515        | 6576 | 552  | 527  | 416  | <b>2017.6</b> | 1540 | 1041 |
| 1516        | 0    | 0    | 0    | 15   | <b>3.8</b>    | 637  | 198  |
| 1517        | 1282 | 285  | 265  | 3467 | <b>1325.0</b> | 213  | 0    |
| 1601        | 6826 | 5792 | 4068 | 3455 | <b>5035.5</b> | 5157 | 3801 |
| 1602        | 218  | 57   | 19   | 86   | <b>95.1</b>   | 0    | 0    |
| 1603        | 712  | 0    | 0    | 405  | <b>279.3</b>  | 183  | 0    |
| 1604        | 0    | 0    | 0    | 0    | <b>0.0</b>    | 70   | 0    |
| 1605        | 0    | 0    | 0    | 0    | <b>0.0</b>    | 0    | 0    |
| <b>1606</b> | 79   | 130  | 141  | 114  | <b>115.9</b>  | 79   | 0    |
| 1607        | 199  | 87   | 0    | 420  | <b>176.4</b>  | 860  | 0    |
| 1608        | 47   | 0    | 0    | 60   | <b>26.7</b>   | 0    | 0    |
| 1609        | 0    | 0    | 0    | 0    | <b>0.0</b>    | 0    | 0    |
| 1610        | 220  | 314  | 227  | 314  | <b>268.8</b>  | 1077 | 117  |
| <b>1611</b> | 58   | 179  | 224  | 88   | <b>137.1</b>  | 88   | 106  |
| 1612        | 241  | 43   | 0    | 0    | <b>71.1</b>   | 258  | 137  |
| 1613        | 149  | 479  | 373  | 230  | <b>307.9</b>  | 599  | 230  |
| <b>1617</b> | 618  | 97   | 90   | 333  | <b>284.3</b>  | 1690 | 1044 |
| 1619        | 720  | 233  | 355  | 1140 | <b>612.0</b>  | 789  | 205  |
| 1703        | 0    | 127  | 0    | 61   | <b>47.1</b>   | 0    | 0    |
| <b>1705</b> | 0    | 70   | 50   | 46   | <b>41.4</b>   | 35   | 0    |
| 1706        | 27   | 71   | 23   | 33   | <b>38.3</b>   | 24   | 0    |
| 1707        | 100  | 101  | 82   | 0    | <b>70.8</b>   | 47   | 77   |
| <b>1708</b> | 70   | 84   | 76   | 0    | <b>57.4</b>   | 0    | 64   |
| 1709        | 82   | 85   | 62   | 89   | <b>79.5</b>   | 70   | 114  |
| 1710        | 97   | 90   | 76   | 63   | <b>81.6</b>   | 79   | 126  |

|      |      |      |      |      |        |      |      |
|------|------|------|------|------|--------|------|------|
| 1711 | 27   | 17   | 0    | 37   | 20.1   | 0    | 0    |
| 1712 | 20   | 0    | 0    | 0    | 5.0    | 0    | 0    |
| 1713 | 220  | 100  | 179  | 177  | 169.1  | 209  | 61   |
| 1714 | 0    | 0    | 0    | 0    | 0.0    | 0    | 23   |
| 1715 | 15   | 42   | 26   | 25   | 27.0   | 16   | 0    |
| 1801 | 53   | 202  | 93   | 0    | 87.4   | 33   | 101  |
| 1802 | 0    | 0    | 0    | 0    | 0.0    | 0    | 0    |
| 1803 | 20   | 76   | 0    | 17   | 28.3   | 0    | 6    |
| 1805 | 0    | 14   | 0    | 0    | 3.4    | 53   | 93   |
| 1806 | 0    | 31   | 0    | 0    | 7.9    | 0    | 26   |
| 1809 | 73   | 39   | 38   | 45   | 49.0   | 133  | 91   |
| 1810 | 105  | 77   | 35   | 94   | 77.8   | 0    | 170  |
| 1811 | 41   | 30   | 13   | 0    | 21.2   | 39   | 31   |
| 1814 | 201  | 174  | 120  | 137  | 158.0  | 223  | 233  |
| 1815 | 63   | 61   | 38   | 63   | 56.3   | 89   | 103  |
| 1819 | 75   | 56   | 48   | 0    | 44.8   | 59   | 32   |
| 1820 | 62   | 49   | 76   | 87   | 68.4   | 248  | 35   |
| 1821 | 89   | 46   | 107  | 135  | 94.2   | 303  | 506  |
| 1823 | 11   | 0    | 0    | 0    | 2.7    | 32   | 104  |
| 1824 | 207  | 185  | 111  | 146  | 162.2  | 0    | 0    |
| 1825 | 0    | 0    | 0    | 0    | 0.0    | 0    | 0    |
| 1901 | 83   | 0    | 0    | 44   | 31.7   | 101  | 62   |
| 1903 | 495  | 344  | 173  | 91   | 275.7  | 133  | 246  |
| 1904 | 400  | 1324 | 547  | 153  | 605.7  | 725  | 1107 |
| 1905 | 148  | 78   | 41   | 22   | 72.2   | 72   | 74   |
| 2001 | 144  | 73   | 234  | 443  | 223.4  | 56   | 142  |
| 2002 | 0    | 0    | 0    | 1030 | 257.4  | 1096 | 997  |
| 2003 | 846  | 331  | 856  | 915  | 737.2  | 1210 | 1320 |
| 2004 | 8    | 24   | 50   | 59   | 35.1   | 36   | 0    |
| 2005 | 0    | 0    | 0    | 724  | 180.9  | 0    | 0    |
| 2006 | 0    | 0    | 3    | 28   | 7.8    | 0    | 39   |
| 2007 | 0    | 0    | 5    | 15   | 5.0    | 0    | 0    |
| 2101 | 757  | 188  | 291  | 436  | 417.8  | 248  | 85   |
| 2102 | 1673 | 1226 | 1358 | 330  | 1146.8 | 989  | 937  |
| 2105 | 0    | 151  | 0    | 100  | 62.9   | 0    | 0    |
| 2107 | 0    | 32   | 1212 | 1217 | 615.2  | 0    | 0    |
| 2108 | 6675 | 2243 | 3787 | 4133 | 4209.3 | 2518 | 1221 |
| 2109 | 515  | 618  | 513  | 484  | 532.7  | 559  | 449  |
| 2110 | 443  | 126  | 336  | 433  | 334.6  | 192  | 47   |
| 2111 | 223  | 296  | 238  | 390  | 286.8  | 294  | 342  |
| 2112 | 407  | 234  | 192  | 273  | 276.5  | 118  | 62   |
| 2116 | 0    | 0    | 4    | 16   | 5.0    | 20   | 14   |
| 2117 | 34   | 5    | 35   | 18   | 22.9   | 31   | 45   |
| 2118 | 0    | 0    | 0    | 0    | 0.0    | 0    | 14   |
| 2119 | 0    | 0    | 22   | 0    | 5.5    | 0    | 0    |
| 2201 | 282  | 304  | 243  | 182  | 252.9  | 317  | 253  |
| 2202 | 54   | 178  | 62   | 112  | 101.5  | 0    | 52   |
| 2203 | 10   | 18   | 6    | 24   | 14.6   | 3    | 55   |
| 2204 | 47   | 158  | 115  | 71   | 97.9   | 13   | 42   |
| 2301 | 203  | 17   | 85   | 420  | 181.2  | 116  | 133  |
| 2302 | 35   | 0    | 0    | 0    | 8.7    | 0    | 0    |
| 2303 | 651  | 732  | 549  | 428  | 589.9  | 585  | 489  |

|             |      |      |      |      |               |      |      |
|-------------|------|------|------|------|---------------|------|------|
| 2305        | 0    | 0    | 0    | 0    | <b>0.0</b>    | 0    | 312  |
| 2306        | 34   | 14   | 42   | 25   | <b>28.8</b>   | 94   | 29   |
| 2307        | 52   | 5    | 45   | 32   | <b>33.3</b>   | 40   | 0    |
| 2308        | 0    | 0    | 0    | 0    | <b>0.0</b>    | 0    | 0    |
| 2309        | 0    | 53   | 47   | 0    | <b>25.1</b>   | 25   | 58   |
| 2310        | 0    | 0    | 0    | 0    | <b>0.0</b>    | 0    | 0    |
| 2401        | 63   | 36   | 95   | 112  | <b>76.6</b>   | 63   | 74   |
| <b>2402</b> | 481  | 416  | 376  | 157  | <b>357.7</b>  | 435  | 590  |
| 2403        | 2576 | 2166 | 1507 | 692  | <b>1735.2</b> | 1714 | 2234 |
| 2404        | 162  | 24   | 0    | 0    | <b>46.4</b>   | 0    | 0    |
| 2405        | 0    | 124  | 74   | 0    | <b>49.6</b>   | 151  | 0    |
| 2406        | 135  | 120  | 52   | 128  | <b>108.8</b>  | 438  | 795  |
| 2408        | 0    | 0    | 34   | 36   | <b>17.3</b>   | 0    | 0    |
| 2409        | 47   | 130  | 77   | 51   | <b>76.3</b>   | 94   | 53   |
| 2410        | 135  | 310  | 417  | 247  | <b>277.3</b>  | 361  | 105  |
| 2411        | 87   | 101  | 165  | 181  | <b>133.6</b>  | 127  | 82   |
| 2412        | 0    | 151  | 86   | 171  | <b>102.1</b>  | 147  | 163  |
| 2413        | 134  | 0    | 41   | 0    | <b>43.7</b>   | 0    | 0    |
| 2414        | 536  | 639  | 810  | 1110 | <b>774.0</b>  | 1756 | 1163 |
| 2501        | 0    | 60   | 0    | 0    | <b>15.0</b>   | 170  | 0    |
| 2502        | 63   | 0    | 0    | 42   | <b>26.2</b>   | 39   | 98   |
| 2503        | 82   | 59   | 71   | 109  | <b>80.0</b>   | 122  | 111  |
| 2504        | 0    | 122  | 147  | 0    | <b>67.1</b>   | 151  | 0    |
| <b>2506</b> | 75   | 161  | 179  | 169  | <b>146.0</b>  | 286  | 108  |
| 2507        | 137  | 0    | 883  | 0    | <b>255.1</b>  | 1000 | 0    |
| <b>2508</b> | 3    | 61   | 87   | 10   | <b>40.3</b>   | 105  | 79   |
| 2509        | 0    | 62   | 47   | 112  | <b>55.3</b>   | 43   | 99   |
| 2601        | 4447 | 1288 | 1122 | 2458 | <b>2328.8</b> | 2631 | 1490 |
| 2602        | 69   | 87   | 0    | 19   | <b>43.7</b>   | 64   | 60   |
| 2603        | 0    | 0    | 0    | 0    | <b>0.0</b>    | 0    | 0    |
| 2604        | 133  | 130  | 0    | 30   | <b>73.3</b>   | 18   | 116  |
| 2605        | 0    | 0    | 0    | 78   | <b>19.5</b>   | 0    | 0    |
| 2606        | 0    | 55   | 57   | 0    | <b>28.0</b>   | 85   | 0    |
| 2607        | 32   | 0    | 88   | 0    | <b>30.0</b>   | 235  | 72   |
| <b>2608</b> | 0    | 0    | 43   | 0    | <b>10.7</b>   | 62   | 66   |
| <b>2609</b> | 0    | 62   | 0    | 0    | <b>15.5</b>   | 63   | 55   |
| 2610        | 55   | 26   | 46   | 0    | <b>31.8</b>   | 46   | 52   |
| 2611        | 104  | 175  | 78   | 75   | <b>107.8</b>  | 90   | 58   |
| <b>2613</b> | 0    | 0    | 0    | 0    | <b>0.0</b>    | 0    | 58   |
| <b>2614</b> | 71   | 46   | 33   | 0    | <b>37.8</b>   | 0    | 0    |
| 2701        | 0    | 73   | 0    | 0    | <b>18.3</b>   | 11   | 11   |
| 2702        | 0    | 0    | 0    | 0    | <b>0.0</b>    | 0    | 363  |
| 2705        | 91   | 85   | 83   | 0    | <b>64.8</b>   | 64   | 44   |
| 2706        | 2913 | 2617 | 2054 | 35   | <b>1904.7</b> | 2588 | 2250 |
| 2708        | 48   | 12   | 16   | 32   | <b>27.0</b>   | 59   | 27   |
| 2709        | 0    | 0    | 0    | 205  | <b>51.2</b>   | 0    | 0    |
| <b>2710</b> | 84   | 103  | 62   | 75   | <b>81.1</b>   | 36   | 53   |
| <b>2711</b> | 44   | 72   | 39   | 16   | <b>43.0</b>   | 44   | 20   |
| 2712        | 240  | 310  | 0    | 128  | <b>169.6</b>  | 108  | 228  |
| 2713        | 0    | 0    | 0    | 0    | <b>0.0</b>    | 0    | 0    |
| 2714        | 4681 | 4578 | 3524 | 1147 | <b>3482.4</b> | 2967 | 3064 |
| 2715        | 1301 | 876  | 850  | 529  | <b>889.0</b>  | 1238 | 710  |

|      |      |       |       |      |        |      |      |
|------|------|-------|-------|------|--------|------|------|
| 2717 | 174  | 136   | 311   | 96   | 179.2  | 675  | 620  |
| 2718 | 489  | 554   | 477   | 75   | 398.8  | 98   | 158  |
| 2722 | 0    | 0     | 0     | 246  | 61.4   | 0    | 0    |
| 2723 | 106  | 67    | 64    | 52   | 72.2   | 81   | 95   |
| 2724 | 30   | 78    | 32    | 16   | 39.1   | 33   | 23   |
| 2726 | 1452 | 1673  | 1881  | 256  | 1315.5 | 694  | 576  |
| 2727 | 531  | 232   | 148   | 543  | 363.4  | 20   | 56   |
| 2728 | 242  | 340   | 249   | 307  | 284.7  | 242  | 181  |
| 2729 | 68   | 486   | 82    | 167  | 200.5  | 361  | 26   |
| 2730 | 116  | 122   | 92    | 125  | 113.9  | 151  | 90   |
| 2731 | 102  | 132   | 184   | 98   | 129.0  | 261  | 60   |
| 2732 | 132  | 142   | 252   | 101  | 156.9  | 0    | 85   |
| 2733 | 203  | 225   | 156   | 471  | 263.4  | 119  | 158  |
| 2801 | 555  | 689   | 616   | 0    | 465.0  | 243  | 273  |
| 2802 | 909  | 1148  | 624   | 19   | 675.3  | 409  | 741  |
| 2805 | 93   | 82    | 45    | 0    | 55.3   | 106  | 117  |
| 2806 | 101  | 119   | 87    | 0    | 76.9   | 148  | 156  |
| 2807 | 253  | 247   | 323   | 0    | 205.8  | 199  | 192  |
| 2808 | 0    | 739   | 639   | 33   | 352.7  | 209  | 322  |
| 2810 | 91   | 72    | 36    | 50   | 62.3   | 0    | 0    |
| 2813 | 0    | 0     | 0     | 26   | 6.6    | 0    | 0    |
| 2814 | 58   | 196   | 223   | 51   | 131.9  | 97   | 180  |
| 2815 | 318  | 347   | 0     | 131  | 198.9  | 223  | 239  |
| 2816 | 53   | 69    | 49    | 0    | 42.8   | 30   | 35   |
| 2817 | 849  | 1053  | 731   | 8    | 660.4  | 698  | 661  |
| 2818 | 748  | 828   | 904   | 26   | 626.7  | 325  | 259  |
| 2819 | 120  | 112   | 62    | 85   | 94.9   | 113  | 100  |
| 2820 | 650  | 415   | 458   | 138  | 415.1  | 507  | 320  |
| 2821 | 447  | 542   | 423   | 271  | 420.7  | 270  | 358  |
| 2822 | 36   | 54    | 31    | 18   | 34.9   | 85   | 70   |
| 2825 | 118  | 174   | 109   | 83   | 120.9  | 39   | 42   |
| 2827 | 88   | 90    | 73    | 67   | 79.4   | 173  | 90   |
| 2828 | 3287 | 2800  | 2170  | 1832 | 2522.2 | 2947 | 2529 |
| 2829 | 46   | 40    | 23    | 37   | 36.7   | 87   | 41   |
| 2830 | 65   | 20    | 70    | 170  | 81.3   | 55   | 16   |
| 2831 | 133  | 97    | 61    | 70   | 90.1   | 19   | 25   |
| 2832 | 70   | 174   | 0     | 39   | 70.5   | 139  | 20   |
| 2901 | 17   | 0     | 36    | 0    | 13.1   | 0    | 0    |
| 2902 | 0    | 0     | 0     | 0    | 0.0    | 22   | 0    |
| 2903 | 0    | 0     | 37    | 0    | 9.2    | 0    | 0    |
| 2907 | 35   | 38    | 25    | 34   | 32.8   | 88   | 73   |
| 2908 | 109  | 147   | 72    | 0    | 82.0   | 317  | 124  |
| 2911 | 135  | 124   | 99    | 166  | 130.9  | 438  | 120  |
| 2914 | 48   | 73    | 62    | 0    | 45.7   | 205  | 22   |
| 3002 | 0    | 0     | 0     | 1307 | 326.7  | 0    | 0    |
| 3003 | 0    | 0     | 485   | 740  | 306.2  | 0    | 0    |
| 3004 | 0    | 0     | 0     | 3720 | 929.9  | 0    | 0    |
| 3005 | 8541 | 10471 | 10911 | 8170 | 9523.4 | 9263 | 5872 |
| 3006 | 0    | 0     | 0     | 73   | 18.4   | 0    | 0    |
| 3013 | 0    | 0     | 22    | 44   | 16.7   | 0    | 0    |
| 3014 | 0    | 0     | 0     | 0    | 0.0    | 0    | 0    |
| 3015 | 0    | 0     | 0     | 0    | 0.0    | 0    | 0    |

|      |      |      |      |       |        |      |      |
|------|------|------|------|-------|--------|------|------|
| 3016 | 0    | 0    | 0    | 28    | 7.0    | 0    | 0    |
| 3017 | 0    | 0    | 0    | 43    | 10.9   | 0    | 0    |
| 3102 | 321  | 298  | 162  | 236   | 254.2  | 0    | 187  |
| 3103 | 2    | 0    | 102  | 0     | 26.0   | 0    | 0    |
| 3104 | 0    | 0    | 0    | 101   | 25.3   | 59   | 82   |
| 3105 | 1914 | 1970 | 1982 | 2013  | 1969.6 | 992  | 1353 |
| 3106 | 37   | 75   | 7    | 23    | 35.5   | 33   | 29   |
| 3109 | 0    | 0    | 0    | 0     | 0.0    | 0    | 0    |
| 3110 | 116  | 98   | 80   | 65    | 89.7   | 6    | 61   |
| 3111 | 60   | 45   | 17   | 27    | 37.3   | 14   | 50   |
| 3112 | 216  | 0    | 41   | 66    | 80.6   | 32   | 22   |
| 3113 | 0    | 0    | 30   | 0     | 7.5    | 0    | 13   |
| 3114 | 0    | 0    | 0    | 0     | 0.0    | 0    | 0    |
| 3201 | 289  | 203  | 284  | 330   | 276.6  | 132  | 193  |
| 3202 | 164  | 150  | 116  | 132   | 140.3  | 0    | 92   |
| 3203 | 1037 | 1086 | 1143 | 979   | 1061.1 | 575  | 1190 |
| 3207 | 0    | 227  | 237  | 189   | 163.3  | 93   | 0    |
| 3208 | 150  | 220  | 155  | 183   | 176.8  | 132  | 215  |
| 3209 | 26   | 12   | 0    | 45    | 20.8   | 0    | 77   |
| 3210 | 0    | 52   | 0    | 0     | 12.9   | 24   | 0    |
| 3301 | 24   | 37   | 22   | 78    | 40.3   | 0    | 40   |
| 3302 | 80   | 173  | 145  | 82    | 120.0  | 131  | 111  |
| 3303 | 39   | 112  | 93   | 66    | 77.5   | 164  | 305  |
| 3304 | 356  | 690  | 0    | 0     | 261.3  | 152  | 406  |
| 3305 | 86   | 66   | 81   | 0     | 58.3   | 0    | 93   |
| 3306 | 0    | 0    | 0    | 22    | 5.6    | 0    | 0    |
| 3307 | 0    | 0    | 0    | 0     | 0.0    | 0    | 0    |
| 3401 | 166  | 176  | 148  | 139   | 157.3  | 132  | 154  |
| 3402 | 14   | 43   | 37   | 65    | 40.0   | 38   | 31   |
| 3403 | 330  | 371  | 374  | 464   | 384.6  | 465  | 320  |
| 3404 | 0    | 64   | 50   | 57    | 42.9   | 20   | 0    |
| 3405 | 5392 | 6836 | 7734 | 10394 | 7589.3 | 9448 | 2980 |
| 3406 | 171  | 276  | 338  | 374   | 289.8  | 540  | 209  |
| 3407 | 70   | 58   | 90   | 42    | 65.0   | 74   | 76   |
| 3408 | 214  | 364  | 385  | 357   | 329.9  | 94   | 215  |
| 3409 | 58   | 130  | 0    | 144   | 82.9   | 61   | 96   |
| 3410 | 0    | 0    | 74   | 0     | 18.4   | 0    | 0    |
| 3411 | 0    | 21   | 22   | 26    | 17.0   | 0    | 0    |
| 3412 | 432  | 481  | 599  | 514   | 506.5  | 243  | 313  |
| 3413 | 0    | 45   | 17   | 0     | 15.5   | 0    | 0    |
| 3414 | 0    | 0    | 0    | 0     | 0.0    | 0    | 0    |
| 3415 | 187  | 297  | 346  | 205   | 258.6  | 147  | 235  |
| 3416 | 0    | 0    | 0    | 68    | 17.0   | 0    | 73   |
| 3417 | 72   | 66   | 41   | 69    | 62.3   | 34   | 67   |
| 3418 | 28   | 0    | 2    | 20    | 12.5   | 0    | 0    |
| 3501 | 18   | 54   | 48   | 215   | 83.6   | 82   | 55   |
| 3502 | 154  | 199  | 265  | 222   | 210.4  | 264  | 355  |
| 3504 | 76   | 77   | 89   | 141   | 95.8   | 110  | 63   |
| 3505 | 0    | 0    | 232  | 0     | 57.9   | 149  | 0    |
| 3506 | 54   | 71   | 57   | 61    | 60.7   | 69   | 51   |
| 3507 | 0    | 0    | 0    | 228   | 57.0   | 0    | 0    |
| 3508 | 0    | 0    | 0    | 25    | 6.2    | 83   | 212  |

|             |      |      |      |      |               |      |      |
|-------------|------|------|------|------|---------------|------|------|
| 3509        | 86   | 79   | 54   | 524  | <b>185.9</b>  | 74   | 23   |
| <b>3510</b> | 129  | 186  | 357  | 213  | <b>221.2</b>  | 60   | 0    |
| 3511        | 69   | 0    | 0    | 0    | <b>17.3</b>   | 0    | 0    |
| 3512        | 0    | 0    | 0    | 48   | <b>12.0</b>   | 62   | 0    |
| 3513        | 44   | 97   | 109  | 226  | <b>119.0</b>  | 0    | 150  |
| <b>3514</b> | 192  | 281  | 206  | 256  | <b>233.7</b>  | 56   | 170  |
| 3601        | 22   | 57   | 35   | 53   | <b>42.0</b>   | 48   | 50   |
| <b>3602</b> | 0    | 0    | 0    | 0    | <b>0.0</b>    | 24   | 36   |
| 3603        | 63   | 79   | 51   | 73   | <b>66.9</b>   | 38   | 109  |
| 3604        | 0    | 0    | 0    | 53   | <b>13.3</b>   | 53   | 117  |
| 3605        | 22   | 37   | 25   | 11   | <b>23.8</b>   | 19   | 6    |
| <b>3606</b> | 0    | 38   | 0    | 0    | <b>9.6</b>    | 0    | 0    |
| 3607        | 139  | 149  | 102  | 148  | <b>134.7</b>  | 82   | 106  |
| <b>3608</b> | 19   | 28   | 0    | 45   | <b>23.0</b>   | 52   | 118  |
| 3609        | 141  | 125  | 93   | 302  | <b>165.3</b>  | 409  | 678  |
| <b>3610</b> | 44   | 49   | 15   | 31   | <b>34.7</b>   | 0    | 0    |
| 3611        | 41   | 78   | 47   | 51   | <b>54.1</b>   | 57   | 40   |
| 3613        | 83   | 94   | 54   | 0    | <b>57.8</b>   | 82   | 54   |
| 3614        | 170  | 212  | 205  | 238  | <b>206.2</b>  | 159  | 169  |
| 3617        | 66   | 162  | 100  | 117  | <b>111.1</b>  | 88   | 111  |
| 3618        | 0    | 0    | 109  | 0    | <b>27.4</b>   | 0    | 48   |
| 3619        | 145  | 431  | 204  | 194  | <b>243.4</b>  | 91   | 330  |
| <b>3620</b> | 765  | 1286 | 867  | 1328 | <b>1061.5</b> | 172  | 602  |
| 3622        | 0    | 0    | 0    | 98   | <b>24.6</b>   | 56   | 132  |
| 3623        | 676  | 811  | 756  | 517  | <b>690.1</b>  | 457  | 546  |
| 3624        | 275  | 283  | 340  | 562  | <b>364.8</b>  | 190  | 228  |
| 3625        | 0    | 0    | 142  | 164  | <b>76.7</b>   | 0    | 86   |
| 3626        | 265  | 548  | 520  | 776  | <b>527.5</b>  | 178  | 614  |
| 3627        | 36   | 0    | 0    | 149  | <b>46.3</b>   | 114  | 0    |
| <b>3628</b> | 202  | 290  | 321  | 97   | <b>227.5</b>  | 0    | 129  |
| 3701        | 619  | 769  | 756  | 4134 | <b>1569.3</b> | 1263 | 731  |
| 3702        | 0    | 0    | 139  | 0    | <b>34.9</b>   | 0    | 35   |
| 3703        | 20   | 0    | 21   | 0    | <b>10.3</b>   | 0    | 0    |
| 3704        | 490  | 784  | 582  | 0    | <b>463.9</b>  | 639  | 251  |
| 3705        | 224  | 223  | 258  | 379  | <b>271.1</b>  | 557  | 196  |
| 3706        | 0    | 50   | 0    | 0    | <b>12.4</b>   | 147  | 156  |
| 3707        | 39   | 139  | 0    | 117  | <b>73.7</b>   | 16   | 0    |
| 3708        | 200  | 116  | 183  | 501  | <b>250.2</b>  | 286  | 125  |
| 3709        | 3527 | 3035 | 2872 | 0    | <b>2358.4</b> | 3332 | 2627 |
| 3710        | 0    | 0    | 0    | 0    | <b>0.0</b>    | 25   | 0    |
| 3711        | 0    | 214  | 0    | 0    | <b>53.6</b>   | 0    | 0    |
| <b>3712</b> | 0    | 0    | 132  | 0    | <b>33.1</b>   | 397  | 72   |
| 3713        | 0    | 0    | 89   | 0    | <b>22.3</b>   | 0    | 0    |
| 3714        | 2451 | 2375 | 1791 | 6405 | <b>3255.4</b> | 2465 | 2189 |
| 3715        | 1255 | 1221 | 1304 | 1415 | <b>1299.1</b> | 1026 | 1021 |
| 3717        | 113  | 106  | 88   | 0    | <b>76.8</b>   | 12   | 52   |
| 3719        | 6805 | 5790 | 8423 | 8718 | <b>7434.0</b> | 6587 | 5834 |
| 3720        | 12   | 40   | 121  | 0    | <b>43.5</b>   | 0    | 0    |
| 3721        | 0    | 0    | 37   | 0    | <b>9.2</b>    | 0    | 0    |
| 3722        | 0    | 0    | 0    | 0    | <b>0.0</b>    | 0    | 114  |
| <b>3724</b> | 0    | 59   | 0    | 255  | <b>78.5</b>   | 0    | 0    |
| 3725        | 1141 | 1179 | 923  | 1215 | <b>1114.4</b> | 703  | 1137 |



|             |       |      |       |       |                |       |      |
|-------------|-------|------|-------|-------|----------------|-------|------|
| <b>3726</b> | 10014 | 9521 | 15476 | 14943 | <b>12488.6</b> | 10680 | 7255 |
| 3727        | 0     | 0    | 0     | 0     | <b>0.0</b>     | 145   | 0    |
| 3728        | 0     | 0    | 0     | 0     | <b>0.0</b>     | 0     | 0    |
| 3801        | 82    | 65   | 46    | 0     | <b>48.4</b>    | 53    | 51   |
| 3802        | 41    | 24   | 57    | 0     | <b>30.4</b>    | 60    | 23   |
| 3804        | 246   | 244  | 243   | 0     | <b>183.4</b>   | 330   | 170  |
| 3806        | 97    | 103  | 0     | 114   | <b>78.5</b>    | 106   | 145  |
| <b>3807</b> | 39    | 41   | 27    | 40    | <b>36.7</b>    | 76    | 49   |
| 3808        | 4     | 22   | 20    | 2     | <b>12.0</b>    | 19    | 47   |
| 3810        | 46    | 44   | 31    | 0     | <b>30.1</b>    | 42    | 10   |
| 3811        | 154   | 156  | 143   | 170   | <b>155.8</b>   | 92    | 182  |
| 3812        | 43    | 92   | 54    | 0     | <b>47.4</b>    | 0     | 102  |
| 3813        | 0     | 0    | 0     | 0     | <b>0.0</b>     | 0     | 0    |
| 3815        | 0     | 105  | 0     | 177   | <b>70.5</b>    | 33    | 0    |
| 3816        | 17    | 118  | 18    | 0     | <b>38.3</b>    | 0     | 0    |
| 3819        | 127   | 185  | 115   | 71    | <b>124.5</b>   | 68    | 113  |
| 3820        | 158   | 69   | 225   | 183   | <b>158.7</b>   | 157   | 73   |
| 3901        | 134   | 61   | 38    | 0     | <b>58.2</b>    | 253   | 73   |
| 3904        | 49    | 49   | 43    | 82    | <b>55.9</b>    | 138   | 50   |
| 3908        | 0     | 0    | 67    | 0     | <b>16.7</b>    | 125   | 0    |
| 4002        | 0     | 0    | 0     | 0     | <b>0.0</b>     | 0     | 0    |
| 4004        | 34    | 36   | 40    | 36    | <b>36.6</b>    | 0     | 0    |
| 4005        | 0     | 0    | 0     | 0     | <b>0.0</b>     | 0     | 0    |
| <b>4006</b> | 0     | 0    | 0     | 0     | <b>0.0</b>     | 0     | 0    |
| 4101        | 6856  | 6650 | 5308  | 5591  | <b>6101.3</b>  | 4518  | 5139 |
| 4102        | 0     | 0    | 0     | 0     | <b>0.0</b>     | 0     | 0    |
| 4104        | 1418  | 1450 | 1237  | 1262  | <b>1341.7</b>  | 1074  | 1504 |
| 4105        | 1486  | 2383 | 1931  | 1875  | <b>1919.0</b>  | 1538  | 2596 |
| 4106        | 327   | 648  | 755   | 393   | <b>530.9</b>   | 389   | 816  |
| 4107        | 356   | 602  | 756   | 540   | <b>563.4</b>   | 421   | 0    |
| 4108        | 164   | 159  | 150   | 98    | <b>142.6</b>   | 0     | 128  |
| 4109        | 0     | 0    | 0     | 0     | <b>0.0</b>     | 21    | 0    |
| <b>4110</b> | 0     | 0    | 0     | 14    | <b>3.5</b>     | 0     | 30   |
| 4111        | 0     | 0    | 0     | 0     | <b>0.0</b>     | 0     | 12   |
| <b>4112</b> | 0     | 0    | 0     | 0     | <b>0.0</b>     | 1     | 25   |
| 4113        | 0     | 45   | 29    | 37    | <b>28.0</b>    | 0     | 3    |
| 4201        | 0     | 110  | 0     | 0     | <b>27.4</b>    | 0     | 0    |
| 4202        | 0     | 0    | 12    | 58    | <b>17.5</b>    | 0     | 57   |
| <b>4204</b> | 633   | 678  | 823   | 1046  | <b>794.9</b>   | 417   | 544  |
| 4206        | 0     | 0    | 64    | 101   | <b>41.3</b>    | 0     | 48   |
| <b>4207</b> | 713   | 812  | 920   | 977   | <b>855.4</b>   | 944   | 826  |
| 4209        | 0     | 14   | 164   | 161   | <b>84.6</b>    | 0     | 188  |
| 4210        | 0     | 0    | 0     | 0     | <b>0.0</b>     | 0     | 0    |
| <b>4212</b> | 134   | 160  | 192   | 165   | <b>162.8</b>   | 198   | 290  |
| <b>4213</b> | 95    | 133  | 128   | 141   | <b>124.2</b>   | 52    | 225  |
| <b>4214</b> | 0     | 0    | 0     | 0     | <b>0.0</b>     | 0     | 33   |
| <b>4215</b> | 369   | 397  | 511   | 398   | <b>418.7</b>   | 431   | 511  |
| <b>4216</b> | 63    | 103  | 134   | 134   | <b>108.5</b>   | 127   | 88   |
| <b>4217</b> | 535   | 614  | 528   | 862   | <b>634.5</b>   | 1648  | 2617 |
| 4301        | 112   | 116  | 70    | 206   | <b>126.1</b>   | 205   | 52   |
| 4302        | 0     | 0    | 73    | 83    | <b>39.0</b>    | 0     | 136  |
| 4304        | 72    | 120  | 91    | 80    | <b>90.7</b>    | 0     | 116  |

|             |      |      |      |      |               |      |      |
|-------------|------|------|------|------|---------------|------|------|
| 4305        | 256  | 103  | 510  | 132  | <b>250.5</b>  | 486  | 245  |
| 4306        | 227  | 232  | 212  | 196  | <b>216.7</b>  | 171  | 218  |
| 4307        | 49   | 51   | 0    | 37   | <b>34.1</b>   | 63   | 48   |
| 4308        | 61   | 64   | 301  | 60   | <b>121.3</b>  | 67   | 29   |
| <b>4309</b> | 227  | 242  | 345  | 305  | <b>280.0</b>  | 304  | 272  |
| 4310        | 25   | 50   | 17   | 8    | <b>25.3</b>   | 63   | 144  |
| 4311        | 78   | 85   | 62   | 77   | <b>75.4</b>   | 60   | 109  |
| <b>4312</b> | 144  | 210  | 156  | 176  | <b>171.6</b>  | 167  | 257  |
| 4313        | 0    | 324  | 0    | 392  | <b>179.0</b>  | 918  | 1394 |
| 4314        | 113  | 166  | 100  | 187  | <b>141.2</b>  | 142  | 147  |
| 4316        | 27   | 31   | 159  | 40   | <b>64.1</b>   | 34   | 15   |
| <b>4317</b> | 26   | 55   | 22   | 17   | <b>29.8</b>   | 0    | 52   |
| 4318        | 0    | 0    | 60   | 68   | <b>31.9</b>   | 0    | 59   |
| 4319        | 0    | 0    | 24   | 0    | <b>6.0</b>    | 75   | 0    |
| 4320        | 0    | 0    | 0    | 57   | <b>14.2</b>   | 0    | 0    |
| 4321        | 0    | 0    | 0    | 0    | <b>0.0</b>    | 8    | 0    |
| 4322        | 0    | 0    | 31   | 0    | <b>7.7</b>    | 68   | 121  |
| 4401        | 202  | 200  | 132  | 81   | <b>153.5</b>  | 56   | 129  |
| <b>4402</b> | 97   | 148  | 122  | 0    | <b>91.8</b>   | 101  | 252  |
| 4403        | 0    | 0    | 0    | 0    | <b>0.0</b>    | 131  | 0    |
| 4404        | 0    | 0    | 75   | 70   | <b>36.2</b>   | 0    | 75   |
| 4405        | 710  | 901  | 941  | 967  | <b>879.6</b>  | 1160 | 488  |
| 4406        | 38   | 107  | 50   | 103  | <b>74.5</b>   | 0    | 61   |
| 4407        | 0    | 77   | 51   | 71   | <b>49.8</b>   | 0    | 79   |
| 4408        | 117  | 0    | 186  | 48   | <b>87.8</b>   | 272  | 0    |
| 4409        | 114  | 117  | 134  | 146  | <b>127.5</b>  | 144  | 145  |
| 4410        | 3    | 8    | 8    | 38   | <b>14.4</b>   | 8    | 9    |
| 4411        | 0    | 0    | 71   | 111  | <b>45.5</b>   | 0    | 0    |
| 4412        | 106  | 89   | 130  | 150  | <b>118.7</b>  | 171  | 0    |
| <b>4413</b> | 5    | 0    | 40   | 101  | <b>36.5</b>   | 42   | 14   |
| 4414        | 68   | 72   | 229  | 51   | <b>105.0</b>  | 85   | 28   |
| <b>4415</b> | 22   | 43   | 31   | 11   | <b>27.0</b>   | 33   | 0    |
| 4416        | 16   | 33   | 119  | 10   | <b>44.7</b>   | 17   | 26   |
| <b>4417</b> | 407  | 512  | 586  | 659  | <b>541.1</b>  | 828  | 1183 |
| 4418        | 75   | 83   | 40   | 26   | <b>55.9</b>   | 41   | 0    |
| 4420        | 57   | 58   | 55   | 57   | <b>56.6</b>   | 46   | 29   |
| <b>4421</b> | 613  | 585  | 726  | 705  | <b>657.3</b>  | 1064 | 547  |
| <b>4422</b> | 39   | 42   | 46   | 35   | <b>40.4</b>   | 36   | 46   |
| 4501        | 0    | 0    | 0    | 0    | <b>0.0</b>    | 0    | 0    |
| 4502        | 0    | 0    | 0    | 0    | <b>0.0</b>    | 0    | 13   |
| 4508        | 0    | 208  | 0    | 427  | <b>158.8</b>  | 0    | 206  |
| 4509        | 0    | 52   | 40   | 100  | <b>48.1</b>   | 0    | 0    |
| 4510        | 0    | 89   | 18   | 0    | <b>26.6</b>   | 0    | 136  |
| 4511        | 89   | 98   | 335  | 250  | <b>193.1</b>  | 41   | 78   |
| 4512        | 77   | 84   | 114  | 99   | <b>93.6</b>   | 83   | 194  |
| 4513        | 2572 | 3402 | 3409 | 2762 | <b>3036.1</b> | 3169 | 4121 |
| <b>4514</b> | 29   | 48   | 45   | 27   | <b>37.4</b>   | 31   | 133  |
| 4515        | 0    | 65   | 0    | 0    | <b>16.3</b>   | 0    | 1961 |
| 4518        | 150  | 10   | 741  | 252  | <b>288.0</b>  | 287  | 0    |
| <b>4521</b> | 39   | 63   | 36   | 121  | <b>64.7</b>   | 56   | 0    |
| 4523        | 68   | 86   | 88   | 58   | <b>75.1</b>   | 66   | 0    |
| 4524        | 18   | 21   | 23   | 16   | <b>19.2</b>   | 17   | 320  |

|             |      |      |      |      |               |      |      |
|-------------|------|------|------|------|---------------|------|------|
| 4601        | 0    | 0    | 0    | 92   | <b>23.0</b>   | 59   | 14   |
| <b>4602</b> | 303  | 289  | 410  | 0    | <b>250.7</b>  | 0    | 208  |
| 4603        | 0    | 0    | 0    | 0    | <b>0.0</b>    | 0    | 25   |
| 4604        | 0    | 13   | 0    | 94   | <b>26.8</b>   | 234  | 35   |
| 4605        | 67   | 0    | 137  | 297  | <b>125.0</b>  | 0    | 0    |
| <b>4606</b> | 1782 | 1885 | 2064 | 2294 | <b>2006.1</b> | 2004 | 838  |
| 4607        | 0    | 0    | 0    | 0    | <b>0.0</b>    | 0    | 423  |
| 4608        | 0    | 12   | 62   | 54   | <b>32.0</b>   | 30   | 92   |
| 4609        | 265  | 439  | 325  | 300  | <b>332.2</b>  | 333  | 45   |
| <b>4610</b> | 110  | 105  | 108  | 131  | <b>113.5</b>  | 548  | 31   |
| <b>4611</b> | 2104 | 1893 | 2340 | 1701 | <b>2009.4</b> | 2174 | 2066 |
| 4612        | 31   | 0    | 99   | 88   | <b>54.4</b>   | 121  | 53   |
| 4613        | 0    | 0    | 81   | 44   | <b>31.3</b>   | 0    | 0    |
| 4615        | 39   | 46   | 51   | 58   | <b>48.6</b>   | 90   | 3418 |
| 4617        | 39   | 61   | 79   | 77   | <b>63.9</b>   | 71   | 277  |
| <b>4618</b> | 0    | 0    | 0    | 0    | <b>0.0</b>    | 0    | 33   |
| 4620        | 58   | 80   | 64   | 66   | <b>67.0</b>   | 64   | 0    |
| 4621        | 32   | 48   | 57   | 81   | <b>54.3</b>   | 118  | 120  |
| <b>4701</b> | 0    | 0    | 0    | 0    | <b>0.0</b>    | 0    | 0    |
| 4703        | 5    | 78   | 0    | 106  | <b>47.3</b>   | 0    | 0    |
| <b>4704</b> | 131  | 0    | 205  | 199  | <b>133.7</b>  | 191  | 83   |
| 4705        | 0    | 123  | 0    | 0    | <b>30.7</b>   | 0    | 45   |
| 4706        | 26   | 0    | 101  | 55   | <b>45.3</b>   | 42   | 68   |
| 4709        | 76   | 36   | 82   | 0    | <b>48.6</b>   | 195  | 0    |
| 4710        | 38   | 40   | 36   | 37   | <b>37.7</b>   | 53   | 0    |
| <b>4711</b> | 176  | 48   | 307  | 237  | <b>191.9</b>  | 313  | 101  |
| 4713        | 56   | 0    | 92   | 51   | <b>49.6</b>   | 144  | 551  |
| 4714        | 0    | 0    | 0    | 0    | <b>0.0</b>    | 0    | 0    |
| <b>4715</b> | 107  | 155  | 143  | 98   | <b>125.6</b>  | 162  | 142  |
| 4716        | 39   | 23   | 7    | 36   | <b>26.4</b>   | 42   | 101  |
| <b>4718</b> | 43   | 51   | 79   | 79   | <b>63.0</b>   | 88   | 0    |
| 4719        | 48   | 0    | 26   | 0    | <b>18.6</b>   | 0    | 70   |
| 4721        | 22   | 66   | 69   | 34   | <b>47.9</b>   | 75   | 0    |
| 4722        | 26   | 15   | 26   | 29   | <b>23.9</b>   | 5    | 0    |
| 4724        | 30   | 0    | 0    | 0    | <b>7.4</b>    | 0    | 0    |
| 4801        | 0    | 0    | 0    | 0    | <b>0.0</b>    | 72   | 0    |
| 4802        | 55   | 37   | 90   | 124  | <b>76.2</b>   | 548  | 15   |
| <b>4809</b> | 8    | 0    | 3    | 3    | <b>3.5</b>    | 7    | 0    |
| 4811        | 41   | 46   | 37   | 39   | <b>40.7</b>   | 44   | 0    |
| 4813        | 0    | 0    | 0    | 28   | <b>7.0</b>    | 0    | 0    |
| 4903        | 0    | 0    | 0    | 0    | <b>0.0</b>    | 202  | 0    |
| 4907        | 0    | 0    | 0    | 0    | <b>0.0</b>    | 0    | 0    |
| 5001        | 20   | 0    | 0    | 0    | <b>5.0</b>    | 0    | 0    |
| 5002        | 810  | 600  | 519  | 541  | <b>617.6</b>  | 0    | 407  |
| 5003        | 146  | 74   | 68   | 98   | <b>96.6</b>   | 0    | 76   |
| 5004        | 0    | 0    | 0    | 0    | <b>0.0</b>    | 0    | 0    |
| 5005        | 29   | 15   | 20   | 22   | <b>21.4</b>   | 0    | 11   |
| 5007        | 440  | 348  | 250  | 278  | <b>329.1</b>  | 180  | 148  |
| 5101        | 1176 | 1755 | 1408 | 1141 | <b>1370.1</b> | 1366 | 1537 |
| 5102        | 0    | 0    | 0    | 0    | <b>0.0</b>    | 0    | 0    |
| <b>5103</b> | 190  | 355  | 149  | 131  | <b>206.1</b>  | 175  | 298  |
| 5104        | 11   | 84   | 64   | 57   | <b>54.2</b>   | 59   | 131  |

|             |      |      |      |      |               |      |      |
|-------------|------|------|------|------|---------------|------|------|
| 5105        | 383  | 410  | 305  | 313  | <b>352.6</b>  | 330  | 405  |
| 5106        | 0    | 0    | 0    | 0    | <b>0.0</b>    | 0    | 0    |
| <b>5107</b> | 33   | 4    | 20   | 34   | <b>22.7</b>   | 15   | 38   |
| 5108        | 0    | 32   | 48   | 45   | <b>31.0</b>   | 0    | 0    |
| 5201        | 1318 | 1830 | 1659 | 2236 | <b>1760.7</b> | 1726 | 2154 |
| 5202        | 236  | 239  | 363  | 470  | <b>326.9</b>  | 302  | 353  |
| <b>5203</b> | 0    | 0    | 23   | 0    | <b>5.9</b>    | 0    | 76   |
| 5204        | 0    | 0    | 0    | 0    | <b>0.0</b>    | 0    | 0    |
| <b>5205</b> | 205  | 226  | 240  | 204  | <b>218.7</b>  | 235  | 235  |
| 5206        | 0    | 0    | 93   | 221  | <b>78.4</b>   | 0    | 137  |
| <b>5208</b> | 3582 | 5293 | 3947 | 5286 | <b>4526.9</b> | 2059 | 3405 |
| <b>5209</b> | 82   | 104  | 129  | 100  | <b>103.8</b>  | 78   | 87   |
| 5210        | 0    | 0    | 0    | 0    | <b>0.0</b>    | 0    | 0    |
| 5211        | 0    | 0    | 459  | 0    | <b>114.8</b>  | 257  | 356  |
| 5212        | 1835 | 836  | 960  | 1112 | <b>1185.6</b> | 985  | 1038 |
| 5215        | 0    | 0    | 0    | 0    | <b>0.0</b>    | 0    | 0    |
| 5216        | 572  | 781  | 388  | 186  | <b>482.1</b>  | 283  | 425  |
| 5301        | 98   | 83   | 70   | 118  | <b>92.2</b>   | 82   | 0    |
| 5302        | 0    | 0    | 0    | 81   | <b>20.2</b>   | 0    | 0    |
| 5303        | 2104 | 2195 | 1749 | 2108 | <b>2039.0</b> | 2385 | 1791 |
| 5306        | 396  | 438  | 576  | 739  | <b>537.3</b>  | 675  | 484  |
| 5307        | 0    | 60   | 77   | 90   | <b>56.9</b>   | 0    | 0    |
| 5310        | 202  | 225  | 121  | 181  | <b>182.5</b>  | 196  | 156  |
| 5311        | 417  | 286  | 306  | 526  | <b>383.7</b>  | 374  | 233  |
| 5312        | 127  | 345  | 267  | 426  | <b>291.4</b>  | 340  | 320  |
| 5313        | 0    | 0    | 246  | 0    | <b>61.4</b>   | 0    | 0    |
| 5314        | 273  | 103  | 114  | 260  | <b>187.7</b>  | 151  | 96   |
| 5315        | 0    | 0    | 0    | 0    | <b>0.0</b>    | 0    | 20   |
| 5316        | 0    | 28   | 71   | 21   | <b>29.9</b>   | 0    | 78   |
| 5318        | 504  | 513  | 680  | 850  | <b>636.8</b>  | 605  | 660  |
| 5320        | 0    | 0    | 0    | 0    | <b>0.0</b>    | 0    | 0    |
| 5401        | 35   | 67   | 52   | 39   | <b>48.3</b>   | 33   | 50   |
| 5403        | 157  | 135  | 158  | 230  | <b>169.9</b>  | 155  | 154  |
| 5406        | 335  | 234  | 285  | 589  | <b>360.7</b>  | 298  | 435  |
| <b>5407</b> | 1832 | 2165 | 2073 | 2521 | <b>2148.0</b> | 3439 | 2274 |
| 5409        | 160  | 68   | 42   | 38   | <b>76.9</b>   | 72   | 41   |
| 5413        | 0    | 0    | 13   | 10   | <b>5.7</b>    | 13   | 19   |
| 5415        | 29   | 65   | 22   | 6    | <b>30.8</b>   | 15   | 0    |
| 5416        | 21   | 29   | 0    | 0    | <b>12.6</b>   | 26   | 0    |
| <b>5417</b> | 25   | 13   | 20   | 26   | <b>20.9</b>   | 17   | 8    |
| <b>5418</b> | 4    | 0    | 11   | 5    | <b>5.0</b>    | 10   | 14   |
| 5502        | 1459 | 1438 | 988  | 1439 | <b>1330.9</b> | 1930 | 2114 |
| 5504        | 192  | 173  | 837  | 0    | <b>300.5</b>  | 459  | 0    |
| 5505        | 544  | 241  | 607  | 958  | <b>587.6</b>  | 938  | 190  |
| 5506        | 0    | 0    | 0    | 501  | <b>125.2</b>  | 0    | 0    |
| 5507        | 0    | 0    | 0    | 0    | <b>0.0</b>    | 187  | 270  |
| 5508        | 1004 | 617  | 1620 | 1480 | <b>1180.3</b> | 616  | 577  |
| 5509        | 0    | 0    | 40   | 0    | <b>9.9</b>    | 0    | 0    |
| 5510        | 542  | 452  | 468  | 975  | <b>609.2</b>  | 669  | 863  |
| 5511        | 94   | 83   | 162  | 263  | <b>150.8</b>  | 209  | 197  |
| 5512        | 5265 | 3879 | 5084 | 4411 | <b>4659.9</b> | 4724 | 4648 |
| 5601        | 122  | 0    | 57   | 77   | <b>63.9</b>   | 0    | 1443 |

|      |      |      |      |      |        |      |      |
|------|------|------|------|------|--------|------|------|
| 5602 | 315  | 291  | 1218 | 821  | 661.1  | 940  | 919  |
| 5603 | 0    | 106  | 96   | 57   | 64.9   | 220  | 0    |
| 5604 | 0    | 40   | 53   | 26   | 29.7   | 43   | 61   |
| 5605 | 51   | 78   | 281  | 69   | 119.5  | 126  | 44   |
| 5606 | 0    | 0    | 0    | 67   | 16.9   | 20   | 9    |
| 5607 | 476  | 161  | 212  | 576  | 356.3  | 281  | 123  |
| 5608 | 0    | 0    | 101  | 0    | 25.1   | 0    | 0    |
| 5609 | 0    | 38   | 0    | 86   | 31.0   | 0    | 0    |
| 5610 | 66   | 30   | 209  | 11   | 79.0   | 53   | 31   |
| 5611 | 1757 | 1882 | 2378 | 2259 | 2068.9 | 2898 | 2720 |
| 5612 | 0    | 120  | 0    | 0    | 29.9   | 0    | 0    |
| 5616 | 749  | 256  | 0    | 842  | 461.9  | 916  | 657  |
| 5701 | 28   | 59   | 106  | 0    | 48.1   | 75   | 327  |
| 5702 | 49   | 49   | 128  | 68   | 73.6   | 69   | 74   |
| 5703 | 201  | 148  | 157  | 206  | 178.0  | 309  | 0    |
| 5704 | 0    | 0    | 0    | 65   | 16.1   | 46   | 0    |
| 5705 | 79   | 74   | 52   | 74   | 70.0   | 80   | 49   |
| 5706 | 228  | 177  | 264  | 318  | 247.2  | 333  | 217  |
| 5707 | 155  | 161  | 153  | 172  | 159.9  | 196  | 149  |
| 5708 | 0    | 0    | 0    | 0    | 0.0    | 0    | 0    |
| 5709 | 0    | 0    | 0    | 33   | 8.3    | 0    | 0    |
| 5710 | 0    | 51   | 0    | 36   | 21.8   | 72   | 33   |
| 5711 | 170  | 223  | 0    | 313  | 176.3  | 306  | 332  |
| 5712 | 143  | 34   | 35   | 83   | 73.8   | 115  | 54   |
| 5713 | 157  | 0    | 0    | 34   | 47.8   | 38   | 0    |
| 5714 | 86   | 58   | 374  | 90   | 152.2  | 87   | 73   |
| 5715 | 845  | 549  | 1459 | 1101 | 988.5  | 1058 | 653  |
| 5716 | 0    | 0    | 0    | 0    | 0.0    | 27   | 0    |
| 5717 | 27   | 0    | 106  | 44   | 44.1   | 58   | 30   |
| 5720 | 0    | 0    | 0    | 22   | 5.5    | 0    | 36   |
| 5722 | 100  | 43   | 0    | 82   | 56.2   | 124  | 0    |
| 5723 | 298  | 82   | 250  | 566  | 298.8  | 558  | 199  |
| 5724 | 109  | 115  | 236  | 236  | 173.8  | 248  | 227  |
| 5802 | 0    | 0    | 60   | 110  | 42.5   | 0    | 322  |
| 5803 | 168  | 108  | 56   | 388  | 179.9  | 307  | 139  |
| 5804 | 0    | 0    | 18   | 22   | 9.9    | 16   | 6    |
| 5805 | 45   | 48   | 45   | 65   | 50.5   | 65   | 21   |
| 5809 | 517  | 133  | 365  | 727  | 435.3  | 723  | 557  |
| 5810 | 71   | 43   | 56   | 58   | 57.2   | 64   | 63   |
| 5811 | 51   | 68   | 83   | 104  | 76.7   | 100  | 88   |
| 5812 | 41   | 25   | 58   | 51   | 43.7   | 59   | 51   |
| 5813 | 0    | 0    | 120  | 0    | 29.9   | 0    | 0    |
| 5814 | 7    | 6    | 3    | 17   | 8.1    | 38   | 36   |
| 5815 | 0    | 0    | 0    | 56   | 14.0   | 0    | 0    |
| 5816 | 0    | 0    | 536  | 0    | 134.0  | 1035 | 231  |
| 5817 | 646  | 157  | 126  | 622  | 387.7  | 186  | 566  |
| 5818 | 104  | 95   | 275  | 202  | 169.0  | 331  | 208  |
| 5819 | 0    | 0    | 0    | 0    | 0.0    | 26   | 0    |
| 6001 | 0    | 0    | 0    | 0    | 0.0    | 0    | 0    |
| 6002 | 59   | 50   | 0    | 87   | 49.0   | 0    | 95   |
| 6006 | 829  | 609  | 1449 | 1300 | 1046.9 | 561  | 741  |
| 6010 | 692  | 632  | 580  | 769  | 668.3  | 527  | 487  |

|             |       |      |      |      |               |      |       |
|-------------|-------|------|------|------|---------------|------|-------|
| 6014        | 0     | 40   | 0    | 106  | <b>36.5</b>   | 37   | 47    |
| 6103        | 0     | 158  | 200  | 0    | <b>89.5</b>   | 0    | 0     |
| 6105        | 146   | 16   | 62   | 106  | <b>82.5</b>   | 123  | 118   |
| 6108        | 2323  | 5805 | 4750 | 4557 | <b>4358.8</b> | 4959 | 6181  |
| 6109        | 0     | 200  | 681  | 153  | <b>258.5</b>  | 0    | 0     |
| <b>6110</b> | 1197  | 948  | 1095 | 1063 | <b>1075.5</b> | 1031 | 1042  |
| 6111        | 10519 | 9901 | 8239 | 8043 | <b>9175.5</b> | 8573 | 10503 |
| 6112        | 214   | 453  | 303  | 285  | <b>313.4</b>  | 294  | 279   |
| 6113        | 112   | 389  | 914  | 1080 | <b>623.9</b>  | 106  | 1230  |
| 6114        | 116   | 192  | 47   | 194  | <b>136.9</b>  | 134  | 156   |
| 6115        | 501   | 615  | 627  | 622  | <b>591.2</b>  | 604  | 720   |
| 6201        | 0     | 0    | 555  | 1177 | <b>432.9</b>  | 0    | 0     |
| 6202        | 999   | 1539 | 1658 | 2166 | <b>1590.4</b> | 1624 | 1574  |
| 6203        | 3777  | 3368 | 2993 | 2597 | <b>3183.9</b> | 2705 | 3138  |
| 6204        | 650   | 427  | 0    | 0    | <b>269.3</b>  | 1476 | 1029  |
| 6205        | 0     | 0    | 142  | 0    | <b>35.4</b>   | 0    | 0     |
| 6207        | 332   | 382  | 0    | 799  | <b>378.4</b>  | 183  | 383   |
| 6208        | 147   | 55   | 58   | 94   | <b>88.3</b>   | 60   | 58    |
| 6209        | 0     | 0    | 0    | 29   | <b>7.4</b>    | 0    | 57    |
| 6210        | 21    | 0    | 0    | 485  | <b>126.5</b>  | 0    | 783   |
| 6211        | 51    | 63   | 63   | 98   | <b>68.9</b>   | 0    | 62    |
| 6212        | 840   | 688  | 2039 | 927  | <b>1123.5</b> | 1433 | 1070  |
| 6213        | 231   | 91   | 317  | 393  | <b>258.1</b>  | 400  | 481   |
| 6214        | 0     | 0    | 0    | 0    | <b>0.0</b>    | 0    | 0     |
| 6215        | 379   | 614  | 694  | 470  | <b>539.2</b>  | 685  | 676   |
| 6216        | 3547  | 2731 | 2612 | 2802 | <b>2923.1</b> | 3382 | 3140  |
| 6301        | 51    | 0    | 77   | 272  | <b>99.7</b>   | 110  | 0     |
| 6302        | 0     | 0    | 0    | 0    | <b>0.0</b>    | 0    | 50    |
| 6303        | 0     | 0    | 0    | 0    | <b>0.0</b>    | 226  | 0     |
| 6304        | 140   | 118  | 197  | 282  | <b>184.1</b>  | 227  | 256   |
| 6306        | 83    | 93   | 118  | 174  | <b>116.9</b>  | 76   | 161   |
| 6307        | 5298  | 5362 | 4785 | 5095 | <b>5135.0</b> | 5453 | 6019  |
| <b>6308</b> | 109   | 101  | 125  | 157  | <b>123.0</b>  | 282  | 258   |
| 6309        | 409   | 291  | 440  | 550  | <b>422.3</b>  | 447  | 615   |
| 6310        | 150   | 345  | 403  | 454  | <b>337.9</b>  | 401  | 331   |
| 6312        | 963   | 1248 | 1041 | 1144 | <b>1099.1</b> | 1184 | 1253  |
| 6314        | 0     | 31   | 42   | 35   | <b>27.1</b>   | 0    | 0     |
| 6402        | 57    | 30   | 260  | 333  | <b>170.2</b>  | 59   | 184   |
| 6404        | 83    | 47   | 84   | 91   | <b>76.4</b>   | 177  | 76    |
| 6408        | 1906  | 2303 | 2597 | 3042 | <b>2462.3</b> | 2619 | 3520  |
| 6410        | 270   | 133  | 775  | 1646 | <b>705.9</b>  | 353  | 515   |
| 6411        | 329   | 0    | 0    | 0    | <b>82.2</b>   | 288  | 136   |
| 6412        | 26    | 0    | 41   | 0    | <b>16.8</b>   | 68   | 70    |
| 6413        | 63    | 68   | 114  | 170  | <b>103.8</b>  | 178  | 181   |
| 6414        | 171   | 354  | 329  | 402  | <b>314.0</b>  | 238  | 460   |
| 6415        | 91    | 0    | 67   | 123  | <b>70.3</b>   | 168  | 146   |
| 6416        | 0     | 0    | 669  | 259  | <b>232.2</b>  | 148  | 0     |
| <b>6417</b> | 103   | 34   | 83   | 98   | <b>79.6</b>   | 118  | 127   |
| 6418        | 0     | 77   | 189  | 196  | <b>115.6</b>  | 240  | 192   |
| <b>6419</b> | 81    | 93   | 124  | 117  | <b>103.6</b>  | 239  | 135   |
| 6421        | 0     | 51   | 38   | 21   | <b>27.3</b>   | 38   | 23    |
| 6501        | 27    | 0    | 40   | 0    | <b>16.9</b>   | 21   | 66    |

|      |       |       |       |       |         |       |       |
|------|-------|-------|-------|-------|---------|-------|-------|
| 6502 | 71    | 0     | 439   | 139   | 162.1   | 273   | 285   |
| 6504 | 10712 | 3492  | 3448  | 2303  | 4988.7  | 6332  | 5999  |
| 6505 | 12102 | 13480 | 15908 | 18212 | 14925.5 | 15601 | 14042 |
| 6506 | 783   | 280   | 419   | 514   | 498.8   | 803   | 626   |
| 6507 | 0     | 0     | 0     | 0     | 0.0     | 352   | 0     |
| 6508 | 0     | 0     | 0     | 0     | 0.0     | 77    | 619   |
| 6509 | 403   | 298   | 358   | 299   | 339.4   | 364   | 382   |
| 6510 | 715   | 5098  | 0     | 0     | 1453.2  | 1185  | 1036  |
| 6513 | 2351  | 1246  | 2201  | 2674  | 2117.7  | 3315  | 2379  |
| 6514 | 298   | 125   | 320   | 184   | 231.9   | 386   | 240   |
| 6515 | 54    | 0     | 20    | 68    | 35.5    | 105   | 0     |
| 6601 | 832   | 427   | 574   | 983   | 703.6   | 849   | 667   |
| 6605 | 838   | 220   | 0     | 869   | 481.5   | 1036  | 480   |
| 6609 | 1701  | 1060  | 1442  | 1100  | 1325.9  | 2134  | 2382  |
| 6610 | 0     | 0     | 0     | 0     | 0.0     | 0     | 93    |
| 6612 | 59    | 0     | 24    | 98    | 45.2    | 0     | 0     |
| 6613 | 1156  | 667   | 998   | 668   | 872.4   | 1257  | 1053  |
| 6614 | 0     | 133   | 399   | 258   | 197.5   | 0     | 22    |
| 6615 | 0     | 0     | 388   | 214   | 150.4   | 339   | 471   |
| 6701 | 119   | 50    | 124   | 126   | 104.3   | 235   | 98    |
| 6702 | 226   | 81    | 203   | 272   | 195.5   | 321   | 290   |
| 6703 | 2086  | 1103  | 1840  | 1921  | 1737.6  | 2476  | 2200  |
| 6704 | 82    | 0     | 91    | 115   | 71.8    | 295   | 95    |
| 6705 | 63    | 59    | 142   | 106   | 92.4    | 128   | 172   |
| 6706 | 80    | 7     | 89    | 71    | 61.7    | 281   | 16    |
| 6707 | 71    | 20    | 84    | 49    | 56.0    | 137   | 62    |
| 6708 | 1230  | 674   | 891   | 1248  | 1010.8  | 1103  | 685   |
| 6709 | 27    | 0     | 12    | 13    | 13.1    | 25    | 7     |
| 6711 | 0     | 0     | 753   | 0     | 188.3   | 0     | 0     |
| 6713 | 0     | 0     | 0     | 0     | 0.0     | 0     | 0     |
| 6714 | 1564  | 374   | 630   | 1456  | 1005.9  | 1787  | 371   |
| 6715 | 1256  | 486   | 1164  | 1368  | 1068.5  | 2236  | 761   |
| 6716 | 282   | 101   | 116   | 138   | 159.3   | 296   | 515   |
| 6717 | 234   | 365   | 1027  | 375   | 500.2   | 547   | 1346  |
| 6718 | 223   | 205   | 297   | 253   | 244.6   | 338   | 117   |
| 6719 | 697   | 0     | 0     | 621   | 329.5   | 0     | 752   |
| 6720 | 128   | 44    | 215   | 216   | 150.7   | 209   | 123   |
| 6721 | 3980  | 2006  | 3211  | 2897  | 3023.3  | 3789  | 3094  |
| 6722 | 120   | 47    | 92    | 92    | 87.6    | 201   | 188   |
| 6801 | 41    | 27    | 259   | 57    | 96.0    | 51    | 75    |
| 6803 | 52    | 45    | 49    | 90    | 59.0    | 193   | 112   |
| 6804 | 0     | 0     | 0     | 15    | 3.8     | 67    | 0     |
| 6805 | 0     | 0     | 152   | 142   | 73.5    | 310   | 339   |
| 6806 | 330   | 27    | 488   | 516   | 340.4   | 1305  | 214   |
| 6807 | 0     | 0     | 0     | 0     | 0.0     | 0     | 0     |
| 6809 | 353   | 264   | 639   | 580   | 459.2   | 868   | 761   |
| 6811 | 170   | 91    | 200   | 270   | 182.7   | 606   | 414   |
| 6812 | 0     | 0     | 4     | 0     | 1.0     | 77    | 28    |
| 6813 | 105   | 145   | 416   | 180   | 211.4   | 312   | 247   |
| 6814 | 21    | 0     | 0     | 0     | 5.2     | 45    | 22    |
| 6815 | 1039  | 385   | 1082  | 1334  | 959.9   | 1754  | 989   |
| 6817 | 60    | 33    | 60    | 102   | 63.9    | 133   | 107   |

|             |       |       |       |       |                |       |       |
|-------------|-------|-------|-------|-------|----------------|-------|-------|
| 6818        | 85    | 71    | 178   | 120   | <b>113.7</b>   | 174   | 143   |
| <b>6819</b> | 20    | 11    | 19    | 35    | <b>21.1</b>    | 49    | 61    |
| 6820        | 3026  | 1302  | 2249  | 2886  | <b>2365.8</b>  | 4089  | 2612  |
| 6822        | 46    | 73    | 81    | 42    | <b>60.5</b>    | 75    | 83    |
| 6826        | 26    | 35    | 50    | 31    | <b>35.6</b>    | 68    | 72    |
| 6905        | 0     | 0     | 72    | 96    | <b>41.9</b>    | 0     | 60    |
| 6906        | 0     | 0     | 57    | 95    | <b>37.9</b>    | 0     | 0     |
| 7002        | 1041  | 159   | 4813  | 1655  | <b>1917.2</b>  | 1265  | 4807  |
| 7006        | 1108  | 1140  | 2022  | 1378  | <b>1412.0</b>  | 984   | 1299  |
| 7007        | 420   | 193   | 1184  | 395   | <b>547.9</b>   | 267   | 478   |
| 7008        | 24    | 0     | 89    | 0     | <b>28.1</b>    | 0     | 0     |
| <b>7010</b> | 3495  | 7810  | 12444 | 8440  | <b>8047.3</b>  | 12187 | 16350 |
| 7011        | 79    | 56    | 237   | 0     | <b>93.2</b>    | 0     | 71    |
| 7012        | 56391 | 43888 | -3    | 32755 | <b>33257.6</b> | 48602 | 61880 |
| 7013        | 181   | 1083  | 973   | 497   | <b>683.6</b>   | 738   | 679   |
| 7015        | 317   | 308   | 958   | 320   | <b>475.9</b>   | 215   | 360   |
| 7017        | 41    | 37    | 152   | 0     | <b>57.6</b>    | 0     | 59    |
| 7018        | 77    | 0     | 33    | 89    | <b>49.7</b>    | 15    | 24    |
| 7019        | 0     | 62    | 0     | 0     | <b>15.5</b>    | 0     | 73    |
| 7101        | 105   | 189   | 131   | 157   | <b>145.7</b>   | 117   | 109   |
| 7102        | 454   | 794   | 845   | 838   | <b>732.7</b>   | 805   | 990   |
| 7103        | 106   | 189   | 161   | 135   | <b>147.8</b>   | 205   | 171   |
| 7104        | 0     | 54    | 69    | 0     | <b>30.6</b>    | 0     | 32    |
| 7106        | 2156  | 1626  | 1158  | 1066  | <b>1501.2</b>  | 1964  | 1546  |
| 7107        | 319   | 403   | 427   | 405   | <b>388.4</b>   | 548   | 427   |
| 7108        | 741   | 496   | 379   | 266   | <b>470.6</b>   | 655   | 698   |
| 7109        | 155   | 68    | 140   | 95    | <b>114.5</b>   | 120   | 232   |
| 7110        | 3415  | 1723  | 5160  | 1347  | <b>2911.4</b>  | 5113  | 6697  |
| 7112        | 83    | 69    | 130   | 128   | <b>102.5</b>   | 57    | 220   |
| 7113        | 2222  | 2401  | 2992  | 1613  | <b>2307.1</b>  | 2766  | 2784  |
| 7114        | -3    | 46291 | 46678 | -3    | <b>23240.8</b> | 47399 | -3    |
| 7117        | 206   | 0     | 325   | 27    | <b>139.7</b>   | 30    | 70    |
| 7118        | 11    | 78    | 52    | 54    | <b>48.9</b>    | 47    | 76    |
| 7119        | 61    | 124   | 181   | 76    | <b>110.3</b>   | 72    | 106   |
| 7120        | 40    | 29    | 101   | 40    | <b>52.6</b>    | 40    | 107   |
| 7121        | 0     | 0     | 0     | 0     | <b>0.0</b>     | 0     | 36    |
| 7201        | 0     | 984   | 0     | 818   | <b>450.7</b>   | 0     | 1963  |
| 7202        | 0     | 284   | 475   | 167   | <b>231.6</b>   | 267   | 225   |
| 7205        | 298   | 341   | 178   | 0     | <b>204.2</b>   | 260   | 361   |
| 7206        | 0     | 0     | 14    | 0     | <b>3.5</b>     | 0     | 0     |
| 7209        | 1261  | 0     | 1013  | 695   | <b>742.1</b>   | 1738  | 642   |
| 7210        | 4388  | 3778  | 4833  | 3683  | <b>4170.3</b>  | 4677  | 4899  |
| <b>7211</b> | 880   | 721   | 762   | 653   | <b>754.0</b>   | 912   | 1195  |
| 7212        | 0     | 0     | 0     | 118   | <b>29.4</b>    | 0     | 0     |
| 7216        | 591   | 809   | 970   | 525   | <b>723.9</b>   | 1003  | 1316  |
| 7217        | 2011  | 2154  | 1985  | 1646  | <b>1949.0</b>  | 2717  | 3457  |
| 7218        | 563   | 773   | 1367  | 650   | <b>838.3</b>   | 896   | 682   |
| 7219        | 334   | 773   | 1240  | 435   | <b>695.5</b>   | 721   | 792   |
| 7222        | 82    | 222   | 382   | 168   | <b>213.5</b>   | 365   | 513   |
| 7302        | 163   | 166   | 438   | 436   | <b>300.7</b>   | 650   | 803   |
| 7303        | 147   | 177   | 245   | 262   | <b>207.6</b>   | 246   | 421   |
| 7304        | 0     | 0     | 172   | 35    | <b>51.9</b>    | 0     | 120   |



|             |       |       |       |       |                |       |       |
|-------------|-------|-------|-------|-------|----------------|-------|-------|
| 7306        | 79    | 132   | 182   | 190   | <b>145.9</b>   | 226   | 476   |
| 7308        | 391   | 419   | 514   | 326   | <b>412.4</b>   | 657   | 706   |
| 7311        | 135   | 402   | 475   | 323   | <b>333.8</b>   | 594   | 609   |
| 7313        | 130   | 44    | 412   | 188   | <b>193.4</b>   | 415   | 475   |
| 7315        | 0     | 0     | 0     | 38    | <b>9.6</b>     | 21    | 43    |
| 7316        | 266   | 707   | 1355  | 558   | <b>721.6</b>   | 672   | 1605  |
| 7318        | 3307  | 3416  | 4792  | 2970  | <b>3621.0</b>  | 3616  | 7858  |
| 7323        | 2171  | 2321  | 4656  | 2951  | <b>3024.8</b>  | 2979  | 5181  |
| 7324        | 95    | 480   | 712   | 353   | <b>410.0</b>   | 251   | 881   |
| <b>7325</b> | 1384  | 1748  | 1981  | 1528  | <b>1660.3</b>  | 1195  | 1358  |
| 7326        | 1300  | 1843  | 916   | 2069  | <b>1532.2</b>  | 0     | 0     |
| 7402        | 227   | 264   | 440   | 374   | <b>326.2</b>   | 463   | 556   |
| 7403        | 2190  | 1764  | 2593  | 2722  | <b>2317.4</b>  | 2675  | 2678  |
| <b>7405</b> | 58    | 18    | 82    | 55    | <b>53.2</b>    | 187   | 70    |
| 7406        | 22    | 13    | 36    | 0     | <b>17.7</b>    | 57    | 49    |
| 7407        | 232   | 487   | 576   | 522   | <b>454.3</b>   | 511   | 767   |
| 7408        | 71    | 47    | 146   | 75    | <b>84.7</b>    | 169   | 162   |
| 7409        | 0     | 89    | 240   | 32    | <b>90.3</b>    | 358   | 71    |
| 7410        | 8449  | 5460  | 8520  | 6604  | <b>7258.2</b>  | 9637  | 9442  |
| 7411        | 0     | 19    | 49    | 129   | <b>49.2</b>    | 23    | 346   |
| 7412        | 10230 | 12959 | 9730  | 9510  | <b>10607.3</b> | 11466 | 12269 |
| 7413        | 352   | 562   | 1012  | 546   | <b>618.1</b>   | 818   | 900   |
| 7416        | 7756  | 6472  | 3971  | 3433  | <b>5408.0</b>  | 4458  | 5426  |
| 7417        | 80    | 137   | 197   | 113   | <b>131.8</b>   | 224   | 96    |
| 7501        | 0     | 0     | 0     | 0     | <b>0.0</b>     | 0     | 0     |
| <b>7503</b> | 1045  | 622   | 1005  | 752   | <b>856.0</b>   | 1203  | 1169  |
| <b>7507</b> | 7620  | 6111  | 6803  | 7189  | <b>6930.8</b>  | 8302  | 7924  |
| 7508        | 2500  | 290   | 2506  | 1992  | <b>1821.9</b>  | 3196  | 2709  |
| 7511        | 0     | 0     | 684   | 321   | <b>251.4</b>   | 324   | 493   |
| 7512        | 23629 | 14596 | 20623 | 11437 | <b>17571.2</b> | 25622 | 22869 |
| 7513        | 0     | 880   | 1225  | 835   | <b>735.0</b>   | 1722  | 1062  |
| 7514        | 405   | 0     | 0     | 0     | <b>101.2</b>   | 0     | 0     |
| 7515        | 2181  | 1264  | 1975  | 1472  | <b>1722.8</b>  | 2266  | 3123  |
| 7516        | 2571  | 2237  | 3725  | 2207  | <b>2684.9</b>  | 3204  | 2739  |
| 7517        | 0     | 576   | 0     | 0     | <b>143.9</b>   | 233   | 0     |
| 7518        | 919   | 7029  | 4565  | 4696  | <b>4302.2</b>  | 4590  | 5464  |
| 7519        | 389   | 3158  | 4873  | 2164  | <b>2645.9</b>  | 0     | 4916  |
| 7520        | 3799  | 0     | 0     | 0     | <b>949.6</b>   | 828   | 2381  |
| <b>7521</b> | 995   | 1940  | 3329  | 1779  | <b>2010.8</b>  | 2358  | 725   |
| 7523        | 1107  | 1412  | 467   | 361   | <b>836.7</b>   | 0     | 1334  |
| 7525        | 3965  | 8453  | 5080  | 14945 | <b>8110.5</b>  | 17335 | 5356  |
| 7526        | 2574  | 1796  | 3620  | 3206  | <b>2799.0</b>  | 1450  | 4273  |
| <b>7527</b> | 1059  | 973   | 2327  | 909   | <b>1317.0</b>  | 915   | 1987  |
| 7528        | 4323  | 13986 | 3535  | 9608  | <b>7863.1</b>  | 6830  | 4172  |
| 7601        | 316   | 45    | 274   | 409   | <b>261.2</b>   | 767   | 328   |
| 7602        | 0     | 0     | 1112  | 0     | <b>278.1</b>   | 0     | 0     |
| 7604        | 3715  | 0     | 889   | 2296  | <b>1725.1</b>  | 3535  | 2027  |
| 7605        | 1161  | 1017  | 1547  | 962   | <b>1171.5</b>  | 1864  | 1815  |
| 7606        | 1220  | 0     | 2703  | 1642  | <b>1391.2</b>  | 2339  | 884   |
| 7607        | 837   | 908   | 1238  | 799   | <b>945.6</b>   | 1021  | 1270  |
| 7608        | 12535 | 10971 | 6655  | 8528  | <b>9672.3</b>  | 12304 | 7643  |
| 7609        | 0     | 0     | 3521  | 4052  | <b>1893.1</b>  | 3348  | 0     |

|             |       |       |       |      |               |       |       |
|-------------|-------|-------|-------|------|---------------|-------|-------|
| 7610        | 266   | 774   | 705   | 422  | <b>541.8</b>  | 383   | 218   |
| 7611        | 690   | 261   | 465   | 433  | <b>462.2</b>  | 1097  | 491   |
| 7701        | 947   | 1314  | 1979  | 1680 | <b>1480.1</b> | 2616  | 1869  |
| <b>7704</b> | 229   | 175   | 252   | 201  | <b>214.2</b>  | 405   | 276   |
| 7705        | 2821  | 2517  | 2788  | 1987 | <b>2528.3</b> | 3822  | 3559  |
| <b>7706</b> | 64    | 0     | 138   | 69   | <b>67.8</b>   | 216   | 0     |
| <b>7801</b> | 46    | 0     | 105   | 43   | <b>48.6</b>   | 80    | 79    |
| 7802        | 10426 | 6266  | 3937  | 8048 | <b>7169.2</b> | 11977 | 9569  |
| 7804        | 30    | 23    | 19    | 0    | <b>17.8</b>   | 42    | 48    |
| 7808        | 6218  | 3078  | 4277  | 5588 | <b>4790.2</b> | 7471  | 5312  |
| 7901        | 0     | 0     | 0     | 0    | <b>0.0</b>    | 0     | 0     |
| 7902        | 0     | 44    | 64    | 40   | <b>36.9</b>   | 33    | 16    |
| 7909        | 0     | 0     | 0     | 0    | <b>0.0</b>    | 0     | 0     |
| 8001        | 5955  | 11890 | 11720 | 2337 | <b>7975.5</b> | 13336 | 12709 |
| 8007        | 7141  | 7560  | 6896  | 7250 | <b>7211.7</b> | 4682  | 5502  |
| <b>8011</b> | 0     | 172   | 255   | 170  | <b>149.6</b>  | 0     | 102   |
| 8012        | 0     | 0     | 0     | 0    | <b>0.0</b>    | 0     | 0     |
| 8013        | 1556  | 556   | 1885  | 1939 | <b>1483.9</b> | 383   | 462   |
| 8024        | 0     | 170   | 211   | 107  | <b>121.8</b>  | 99    | 87    |
| <b>8025</b> | 1281  | 964   | 921   | 2118 | <b>1321.0</b> | 1475  | 575   |
| 8026        | 0     | 47    | 20    | 0    | <b>16.8</b>   | 6     | 29    |
| 8027        | 86    | 56    | 55    | 88   | <b>71.1</b>   | 67    | 20    |
| 8028        | 101   | 0     | 118   | 0    | <b>54.9</b>   | 120   | 0     |
| <b>8102</b> | 191   | 456   | 505   | 273  | <b>356.4</b>  | 315   | 168   |
| 8105        | 0     | 0     | 0     | 0    | <b>0.0</b>    | 0     | 0     |
| 8106        | 0     | 0     | 0     | 0    | <b>0.0</b>    | 0     | 0     |
| 8117        | 0     | 106   | 110   | 62   | <b>69.4</b>   | 87    | 23    |
| <b>8118</b> | 33    | 32    | 66    | 36   | <b>41.7</b>   | 40    | 13    |
| <b>8119</b> | 109   | 277   | 114   | 105  | <b>151.2</b>  | 102   | 84    |
| 8120        | 0     | 54    | 7     | 0    | <b>15.3</b>   | 21    | 29    |
| 8205        | 397   | 904   | 843   | 1045 | <b>797.1</b>  | 706   | 750   |
| <b>8213</b> | 105   | 299   | 493   | 497  | <b>348.3</b>  | 173   | 255   |
| 8214        | 250   | 78    | 422   | 396  | <b>286.5</b>  | 263   | 0     |
| 8215        | 285   | 671   | 817   | 503  | <b>569.1</b>  | 316   | 465   |
| <b>8216</b> | 673   | 1464  | 1685  | 1311 | <b>1283.4</b> | 482   | 624   |
| 8302        | 1365  | 1028  | 0     | 0    | <b>598.3</b>  | 1433  | 0     |
| 8303        | 1476  | 2475  | 2286  | 1603 | <b>1960.0</b> | 3060  | 2953  |
| 8306        | 0     | 0     | 0     | 28   | <b>7.1</b>    | 0     | 53    |
| 8307        | 229   | 502   | 565   | 430  | <b>431.7</b>  | 478   | 474   |
| 8308        | 1129  | 3193  | 1541  | 1723 | <b>1896.7</b> | 1804  | 1639  |
| <b>8310</b> | 3408  | 5335  | 3982  | 3709 | <b>4108.6</b> | 4322  | 2875  |
| 8311        | 1262  | 1437  | 1074  | 989  | <b>1190.4</b> | 0     | 0     |
| 8312        | 121   | 253   | 247   | 0    | <b>155.4</b>  | 0     | 109   |
| 8314        | 0     | 0     | 0     | 0    | <b>0.0</b>    | 0     | 0     |
| 8404        | 1709  | 0     | 0     | 0    | <b>427.3</b>  | 5778  | 0     |
| 8405        | 6926  | 0     | 0     | 0    | <b>1731.4</b> | 3219  | 0     |
| 8501        | 0     | 0     | 0     | 0    | <b>0.0</b>    | 0     | 0     |
| 8511        | 0     | 0     | 0     | 0    | <b>0.0</b>    | 0     | 0     |
| 8512        | 0     | 0     | 0     | 0    | <b>0.0</b>    | 0     | 0     |
| 8601        | 0     | 0     | 746   | 167  | <b>228.1</b>  | 0     | 0     |
| 8602        | 129   | 124   | 214   | 46   | <b>128.5</b>  | 234   | 135   |
| 8603        | 0     | 1426  | 74    | 0    | <b>375.0</b>  | 0     | 0     |

|      |          |          |          |          |              |          |          |
|------|----------|----------|----------|----------|--------------|----------|----------|
| 8806 | 0        | 0        | 256      | 2594     | <b>712.3</b> | 359      | 0        |
| 9020 | 0        | 0        | 0        | 0        | <b>0.0</b>   | 0        | 0        |
| 9021 | 0        | 0        | 0        | 0        | <b>0.0</b>   | 0        | 0        |
| 9109 | 0        | 0        | 0        | 0        | <b>0.0</b>   | 0        | 0        |
| 9110 | 0        | 0        | 0        | 0        | <b>0.0</b>   | 0        | 0        |
| 9111 | 0        | 0        | 0        | 0        | <b>0.0</b>   | 0        | 0        |
| 9112 | 0        | 0        | 0        | 0        | <b>0.0</b>   | 0        | 0        |
| 9113 | 0        | 0        | 0        | 0        | <b>0.0</b>   | 0        | 0        |
| 9208 | 0        | 0        | 0        | 0        | <b>0.0</b>   | 0        | 0        |
| 9209 | 0        | 0        | 0        | 0        | <b>0.0</b>   | 0        | 0        |
| 9210 | 0        | 0        | 0        | 0        | <b>0.0</b>   | 0        | 0        |
| 9211 | 0        | 0        | 0        | 0        | <b>0.0</b>   | 0        | 0        |
| 9310 | 0        | 0        | 0        | 0        | <b>0.0</b>   | 0        | 0        |
| 9311 | 0        | 0        | 0        | 0        | <b>0.0</b>   | 0        | 0        |
| 9409 | 0        | 0        | 0        | 0        | <b>0.0</b>   | 0        | 0        |
| 9410 | 0        | 0        | 0        | 0        | <b>0.0</b>   | 0        | 0        |
| 9506 | 0        | 0        | 0        | 0        | <b>0.0</b>   | 0        | 0        |
| 9605 | 0        | 0        | 0        | 0        | <b>0.0</b>   | 0        | 0        |
| 9807 | 0        | 0        | 0        | 0        | <b>0.0</b>   | 0        | 0        |
| 9902 | 0        | 0        | 0        | 0        | <b>0.0</b>   | 0        | 0        |
| 9903 | 0        | 0        | 0        | 0        | <b>0.0</b>   | 0        | 0        |
|      | quantity | quantity | quantity | quantity |              | quantity | quantity |

| 20040531H | 20040531I | 20040531J | 12mon          | 20040531K | 20040531L | 20040531M | 20040628Nrs |
|-----------|-----------|-----------|----------------|-----------|-----------|-----------|-------------|
| 1938      | 987       | 3057      | <b>1697.8</b>  | 2354      | 1395      | 1478      | 1814        |
| 632       | 132       | 431       | <b>404.0</b>   | 388       | 204       | 527       | 418         |
| 149       | 61        | 122       | <b>110.3</b>   | 128       | 156       | 90        | 153         |
| 435       | 79        | 408       | <b>268.1</b>   | 239       | 210       | 228       | 476         |
| 231       | 101       | 569       | <b>278.2</b>   | 548       | 378       | 1527      | 951         |
| 239       | 85        | 209       | <b>142.2</b>   | 251       | 239       | 107       | 277         |
| 173       | 29        | 273       | <b>123.5</b>   | 155       | 106       | 157       | 104         |
| 83        | 9         | 80        | <b>47.3</b>    | 55        | 44        | 12        | 52          |
| 349       | 102       | 383       | <b>286.4</b>   | 482       | 429       | 331       | 793         |
| 0         | 0         | 49        | <b>9.8</b>     | 0         | 161       | 83        | 0           |
| 43        | 19        | 17        | <b>18.2</b>    | 0         | 32        | 0         | 0           |
| 0         | 0         | 36        | <b>7.2</b>     | 0         | 0         | 0         | 0           |
| 1775      | 1311      | 1928      | <b>1729.9</b>  | 2769      | 2521      | 0         | 4340        |
| 205       | 98        | 186       | <b>163.2</b>   | 0         | 108       | 208       | 217         |
| 1661      | 1852      | 1721      | <b>1913.7</b>  | 3064      | 2539      | 830       | 1233        |
| 24339     | 12801     | 19561     | <b>16661.2</b> | 23211     | 21155     | 13662     | 22060       |
| 118       | 196       | 281       | <b>137.5</b>   | 195       | 1         | 236       | 137         |
| 81        | 154       | 156       | <b>146.5</b>   | 253       | 175       | 138       | 0           |
| 29        | 38        | 67        | <b>48.5</b>    | 55        | 44        | 32        | 0           |
| 174       | 16        | 122       | <b>83.5</b>    | 246       | 156       | 272       | 145         |
| 263       | 39        | 15        | <b>88.4</b>    | 409       | 340       | 374       | 531         |
| 0         | 45        | 55        | <b>29.0</b>    | 16        | 17        | 11        | 14          |
| 93        | 0         | 22        | <b>26.0</b>    | 8         | 0         | 109       | 3           |
| 55        | 28        | 95        | <b>44.6</b>    | 23        | 37        | 0         | 11          |
| 52        | 0         | 37        | <b>17.8</b>    | 0         | 10        | 0         | 32          |
| 401       | 263       | 131       | <b>195.0</b>   | 498       | 102       | 621       | 334         |
| 47        | 18        | 61        | <b>33.3</b>    | 34        | 24        | 8         | 0           |
| 78        | 8         | 55        | <b>36.1</b>    | 92        | 18        | 49        | 5           |
| 105       | 36        | 170       | <b>87.9</b>    | 99        | 183       | 144       | 90          |
| 2328      | 1950      | 2067      | <b>1930.4</b>  | 2355      | 1994      | 1517      | 2397        |
| 185       | 52        | 261       | <b>151.3</b>   | 263       | 153       | 145       | 22          |
| 186       | 266       | 220       | <b>158.4</b>   | 182       | 61        | 658       | 177         |
| 124       | 159       | 95        | <b>119.0</b>   | 576       | 165       | 324       | 650         |
| 0         | 0         | 65        | <b>13.0</b>    | 0         | 68        | 167       | 60          |
| 59        | 14        | 2         | <b>19.0</b>    | 7         | 15        | 9         | 48          |
| 0         | 0         | 410       | <b>81.9</b>    | 0         | 180       | 0         | 110         |
| 166       | 190       | 510       | <b>247.0</b>   | 567       | 1101      | 57        | 284         |
| 204       | 0         | 185       | <b>123.0</b>   | 465       | 328       | 113       | 247         |
| 22693     | 17284     | 25722     | <b>19232.2</b> | 39184     | 24045     | 12237     | 25166       |
| 738       | 0         | 706       | <b>311.6</b>   | 638       | 0         | 0         | 0           |
| 289       | 267       | 54        | <b>152.6</b>   | 587       | 150       | 107       | 0           |
| 0         | 0         | 127       | <b>25.5</b>    | 0         | 0         | 0         | 67          |
| 27        | 0         | 107       | <b>42.2</b>    | 78        | 33        | 54        | 81          |
| 589       | 19        | 600       | <b>300.2</b>   | 0         | 179       | 604       | 0           |
| 1         | 0         | 16        | <b>6.5</b>     | 23        | 53        | 27        | 0           |
| 30        | 0         | 23        | <b>13.5</b>    | 24        | 11        | 9         | 61          |
| 2         | 61        | 33        | <b>30.5</b>    | 83        | 0         | 112       | 50          |
| 7423      | 2606      | 6758      | <b>3357.3</b>  | 4497      | 0         | 0         | 0           |
| 27        | 47        | 45        | <b>30.7</b>    | 34        | 6         | 64        | 0           |
| 2         | 24        | 43        | <b>23.7</b>    | 72        | 32        | 0         | 13          |
| 102       | 0         | 145       | <b>49.4</b>    | 365       | 0         | 386       | 181         |

|       |       |       |                |       |       |       |       |
|-------|-------|-------|----------------|-------|-------|-------|-------|
| 61    | 25    | 127   | <b>55.3</b>    | 76    | 55    | 83    | 62    |
| 28    | 0     | 104   | <b>71.2</b>    | 141   | 252   | 40    | 128   |
| 92    | 166   | 103   | <b>106.3</b>   | 253   | 145   | 352   | 324   |
| 214   | 200   | 175   | <b>181.3</b>   | 542   | 169   | 119   | 403   |
| 27    | 138   | 86    | <b>73.7</b>    | 290   | 86    | 462   | 316   |
| 0     | 53    | 45    | <b>50.0</b>    | 140   | 62    | 77    | 840   |
| 20    | 112   | 62    | <b>83.6</b>    | 320   | 106   | 176   | 0     |
| 176   | 807   | 394   | <b>448.7</b>   | 835   | 462   | 594   | 1235  |
| 101   | 0     | 236   | <b>237.8</b>   | 1099  | 575   | 67    | 1699  |
| 21    | 31    | 5     | <b>22.7</b>    | 0     | 15    | 0     | 80    |
| 45    | 0     | 41    | <b>28.0</b>    | 68    | 32    | 0     | 0     |
| 7     | 14    | 24    | <b>12.1</b>    | 61    | 54    | 11    | 0     |
| 18    | 16    | 18    | <b>10.5</b>    | 20    | 7     | 4     | 0     |
| 2435  | 1533  | 1637  | <b>1946.5</b>  | 4226  | 4510  | 2714  | 3666  |
| 645   | 0     | 799   | <b>321.2</b>   | 110   | 433   | 491   | 0     |
| 370   | 220   | 432   | <b>279.4</b>   | 182   | 628   | 659   | 461   |
| 399   | 273   | 725   | <b>354.0</b>   | 643   | 1465  | 1728  | 1004  |
| 749   | 557   | 1062  | <b>689.0</b>   | 610   | 534   | 1432  | 652   |
| 54    | 4     | 61    | <b>38.7</b>    | 78    | 77    | 14    | 62    |
| 792   | 8     | 392   | <b>457.7</b>   | 0     | 0     | 0     | 0     |
| 0     | 0     | 31    | <b>7.2</b>     | 26    | 84    | 14    | 14    |
| 19    | 0     | 204   | <b>59.5</b>    | 0     | 0     | 0     | 0     |
| 165   | 0     | 71    | <b>47.2</b>    | 0     | 0     | 0     | 0     |
| 369   | 0     | 292   | <b>157.1</b>   | 93    | 639   | 245   | 3     |
| 0     | 0     | 120   | <b>51.0</b>    | 160   | 273   | 76    | 179   |
| 733   | 819   | 875   | <b>745.1</b>   | 940   | 963   | 977   | 843   |
| 0     | 3     | 12    | <b>2.9</b>     | 8     | 0     | 0     | 0     |
| 78    | 0     | 95    | <b>82.8</b>    | 0     | 86    | 319   | 4     |
| 0     | 65    | 175   | <b>69.3</b>    | 61    | 128   | 188   | 106   |
| 13    | 82    | 53    | <b>46.8</b>    | 64    | 36    | 48    | 28    |
| 31    | 5     | 53    | <b>30.4</b>    | 36    | 46    | 22    | 0     |
| 0     | 0     | 3     | <b>0.9</b>     | 0     | 0     | 0     | 4     |
| 0     | 0     | 2     | <b>0.5</b>     | 0     | 0     | 0     | 0     |
| 8     | 12    | 50    | <b>25.0</b>    | 39    | 100   | 14    | 30    |
| 20    | 5     | 37    | <b>12.4</b>    | 0     | 0     | 0     | 0     |
| 16    | 9     | 10    | <b>11.8</b>    | 28    | 8     | 6     | 7     |
| 388   | 0     | 232   | <b>207.4</b>   | 323   | 327   | 174   | 402   |
| 2777  | 4685  | 2045  | <b>2896.6</b>  | 3491  | 2644  | 2776  | 6736  |
| 0     | 0     | 107   | <b>36.3</b>    | 21    | 5     | 113   | 0     |
| 35499 | 31358 | 37443 | <b>32636.1</b> | 37240 | 36216 | 33217 | 36876 |
| 0     | 0     | 2847  | <b>569.5</b>   | 854   | 2382  | 0     | 0     |
| 281   | 139   | 204   | <b>206.3</b>   | 567   | 457   | 373   | 410   |
| 398   | 285   | 164   | <b>283.0</b>   | 551   | 693   | 276   | 451   |
| 107   | 76    | 72    | <b>162.1</b>   | 268   | 571   | 128   | 378   |
| 0     | 0     | 427   | <b>170.9</b>   | 8     | 0     | 0     | 53    |
| 42    | 0     | 64    | <b>31.4</b>    | 0     | 0     | 17    | 3     |
| 1258  | 0     | 0     | <b>251.6</b>   | 1473  | 463   | 0     | 0     |
| 817   | 0     | 46    | <b>189.5</b>   | 0     | 0     | 0     | 0     |
| 0     | 485   | 237   | <b>337.6</b>   | 781   | 365   | 1336  | 980   |
| 38    | 0     | 56    | <b>18.8</b>    | 0     | 0     | 0     | 0     |
| 347   | 722   | 610   | <b>525.1</b>   | 908   | 62    | 106   | 634   |
| 65    | 21    | 70    | <b>102.7</b>   | 207   | 502   | 180   | 385   |

|      |      |      |               |      |      |      |      |
|------|------|------|---------------|------|------|------|------|
| 34   | 26   | 50   | <b>36.6</b>   | 160  | 123  | 2    | 44   |
| 0    | 139  | 68   | <b>62.2</b>   | 136  | 31   | 0    | 0    |
| 62   | 42   | 122  | <b>73.2</b>   | 59   | 6    | 47   | 57   |
| 3    | 0    | 95   | <b>20.2</b>   | 0    | 0    | 0    | 0    |
| 147  | 74   | 142  | <b>123.8</b>  | 115  | 67   | 48   | 46   |
| 190  | 394  | 310  | <b>355.2</b>  | 644  | 158  | 48   | 134  |
| 18   | 101  | 63   | <b>62.5</b>   | 307  | 107  | 0    | 40   |
| 106  | 118  | 122  | <b>130.8</b>  | 292  | 118  | 118  | 228  |
| 0    | 0    | 2    | <b>7.4</b>    | 25   | 66   | 0    | 80   |
| 24   | 16   | 16   | <b>17.5</b>   | 41   | 10   | 1    | 0    |
| 29   | 11   | 38   | <b>17.8</b>   | 21   | 45   | 14   | 8    |
| 0    | 94   | 72   | <b>53.6</b>   | 89   | 0    | 0    | 56   |
| 40   | 0    | 41   | <b>18.7</b>   | 22   | 30   | 0    | 0    |
| 185  | 146  | 183  | <b>144.2</b>  | 366  | 287  | 272  | 464  |
| 0    | 162  | 233  | <b>161.1</b>  | 415  | 256  | 111  | 189  |
| 1429 | 0    | 1715 | <b>1283.4</b> | 1934 | 1331 | 1785 | 2616 |
| 0    | 0    | 212  | <b>80.3</b>   | 0    | 0    | 0    | 0    |
| 194  | 0    | 241  | <b>87.1</b>   | 0    | 0    | 0    | 103  |
| 108  | 23   | 126  | <b>69.7</b>   | 47   | 22   | 35   | 67   |
| 311  | 296  | 100  | <b>229.8</b>  | 781  | 57   | 20   | 309  |
| 288  | 181  | 326  | <b>209.6</b>  | 223  | 127  | 153  | 224  |
| 65   | 79   | 89   | <b>63.9</b>   | 56   | 3    | 45   | 55   |
| 623  | 1412 | 401  | <b>1097.2</b> | 2331 | 259  | 81   | 1225 |
| 0    | 0    | 155  | <b>103.0</b>  | 0    | 0    | 0    | 126  |
| 695  | 3039 | 885  | <b>2317.4</b> | 6524 | 1714 | 229  | 1416 |
| 0    | 0    | 141  | <b>28.2</b>   | 0    | 0    | 0    | 506  |
| 0    | 64   | 45   | <b>38.8</b>   | 96   | 7    | 0    | 23   |
| 717  | 452  | 168  | <b>783.5</b>  | 4289 | 8636 | 190  | 6110 |
| 0    | 0    | 79   | <b>182.8</b>  | 608  | 0    | 449  | 0    |
| 228  | 310  | 94   | <b>168.9</b>  | 0    | 313  | 0    | 320  |
| 3495 | 4739 | 1589 | <b>3756.1</b> | 6676 | 6475 | 2048 | 4223 |
| 0    | 0    | 34   | <b>6.8</b>    | 65   | 149  | 107  | 72   |
| 104  | 0    | 112  | <b>79.8</b>   | 125  | 147  | 0    | 0    |
| 73   | 0    | 51   | <b>38.8</b>   | 0    | 0    | 0    | 0    |
| 352  | 0    | 194  | <b>109.1</b>  | 0    | 0    | 0    | 0    |
| 67   | 83   | 73   | <b>60.4</b>   | 134  | 37   | 32   | 85   |
| 0    | 169  | 863  | <b>378.4</b>  | 412  | 547  | 12   | 232  |
| 0    | 0    | 31   | <b>6.2</b>    | 139  | 0    | 0    | 0    |
| 0    | 0    | 154  | <b>30.8</b>   | 0    | 0    | 146  | 0    |
| 0    | 641  | 453  | <b>457.7</b>  | 1442 | 1170 | 68   | 1376 |
| 0    | 168  | 46   | <b>81.6</b>   | 36   | 92   | 151  | 198  |
| 0    | 73   | 51   | <b>103.8</b>  | 0    | 75   | 41   | 22   |
| 12   | 434  | 157  | <b>286.4</b>  | 1022 | 580  | 420  | 595  |
| 1217 | 641  | 899  | <b>1098.3</b> | 307  | 569  | 178  | 536  |
| 277  | 514  | 245  | <b>405.9</b>  | 525  | 295  | 598  | 804  |
| 0    | 0    | 76   | <b>15.3</b>   | 50   | 48   | 103  | 51   |
| 30   | 9    | 51   | <b>24.7</b>   | 40   | 0    | 0    | 0    |
| 0    | 23   | 109  | <b>31.1</b>   | 28   | 16   | 0    | 0    |
| 165  | 46   | 276  | <b>122.2</b>  | 74   | 71   | 0    | 61   |
| 47   | 32   | 91   | <b>46.7</b>   | 0    | 0    | 0    | 0    |
| 127  | 76   | 154  | <b>108.2</b>  | 84   | 95   | 69   | 40   |
| 72   | 151  | 72   | <b>100.1</b>  | 124  | 79   | 61   | 58   |

|      |      |      |        |      |      |      |      |
|------|------|------|--------|------|------|------|------|
| 0    | 0    | 83   | 16.6   | 0    | 28   | 0    | 18   |
| 0    | 0    | 94   | 18.9   | 44   | 0    | 0    | 32   |
| 96   | 76   | 97   | 107.7  | 302  | 302  | 220  | 0    |
| 21   | 10   | 66   | 24.1   | 0    | 0    | 0    | 0    |
| 29   | 8    | 17   | 14.1   | 0    | 26   | 0    | 0    |
| 0    | 0    | 13   | 29.5   | 72   | 41   | 48   | 98   |
| 0    | 0    | 37   | 7.5    | 21   | 7    | 0    | 0    |
| 52   | 46   | 55   | 31.9   | 37   | 37   | 8    | 0    |
| 0    | 35   | 46   | 45.5   | 62   | 36   | 30   | 42   |
| 0    | 0    | 41   | 13.5   | 0    | 0    | 0    | 0    |
| 0    | 76   | 72   | 74.3   | 44   | 61   | 52   | 60   |
| 46   | 64   | 66   | 69.3   | 0    | 53   | 40   | 3    |
| 27   | 36   | 65   | 39.4   | 13   | 52   | 0    | 14   |
| 147  | 111  | 214  | 185.7  | 278  | 314  | 159  | 266  |
| 38   | 35   | 81   | 69.2   | 13   | 48   | 14   | 14   |
| 49   | 0    | 63   | 40.5   | 61   | 87   | 0    | 34   |
| 33   | 29   | 42   | 77.7   | 27   | 91   | 59   | 23   |
| 93   | 128  | 115  | 228.9  | 496  | 387  | 882  | 1540 |
| 30   | 20   | 25   | 42.0   | 0    | 302  | 118  | 157  |
| 0    | 0    | 29   | 5.7    | 0    | 323  | 0    | 0    |
| 0    | 0    | 23   | 4.5    | 3    | 17   | 0    | 0    |
| 0    | 147  | 243  | 110.4  | 0    | 81   | 0    | 98   |
| 104  | 272  | 124  | 175.6  | 133  | 262  | 65   | 71   |
| 99   | 584  | 218  | 546.7  | 616  | 731  | 70   | 405  |
| 0    | 23   | 29   | 39.8   | 0    | 93   | 0    | 0    |
| 604  | 97   | 261  | 231.8  | 56   | 199  | 39   | 199  |
| 1338 | 553  | 1833 | 1163.4 | 1595 | 2502 | 1859 | 4291 |
| 2296 | 1478 | 2835 | 1827.7 | 1423 | 1047 | 675  | 4291 |
| 62   | 24   | 95   | 43.5   | 204  | 364  | 87   | 222  |
| 0    | 0    | 2491 | 498.3  | 0    | 0    | 0    | 1161 |
| 0    | 3    | 44   | 17.3   | 0    | 8    | 0    | 6    |
| 0    | 0    | 17   | 3.4    | 0    | 17   | 0    | 40   |
| 247  | 152  | 188  | 183.9  | 63   | 77   | 100  | 132  |
| 1321 | 967  | 945  | 1031.8 | 1266 | 2289 | 1828 | 1765 |
| 34   | 109  | 101  | 48.6   | 18   | 0    | 0    | 10   |
| 856  | 0    | 2015 | 574.0  | 1459 | 1882 | 3551 | 1788 |
| 3011 | 1297 | 2567 | 2123.0 | 1538 | 1598 | 1494 | 2578 |
| 735  | 628  | 737  | 621.7  | 588  | 685  | 397  | 559  |
| 156  | 124  | 131  | 130.1  | 71   | 80   | 55   | 80   |
| 258  | 276  | 343  | 302.5  | 252  | 293  | 421  | 288  |
| 215  | 86   | 145  | 125.2  | 99   | 134  | 50   | 80   |
| 4    | 6    | 42   | 17.0   | 5    | 19   | 45   | 1    |
| 36   | 25   | 61   | 39.6   | 32   | 34   | 59   | 30   |
| 0    | 0    | 28   | 8.5    | 0    | 33   | 0    | 3    |
| 0    | 2    | 5    | 1.6    | 9    | 0    | 0    | 0    |
| 406  | 265  | 195  | 286.8  | 377  | 514  | 773  | 384  |
| 8    | 0    | 76   | 27.1   | 64   | 180  | 0    | 69   |
| 22   | 19   | 37   | 27.4   | 4    | 28   | 74   | 15   |
| 11   | 55   | 45   | 33.3   | 35   | 22   | 60   | 51   |
| 88   | 139  | 219  | 139.0  | 56   | 0    | 47   | 36   |
| 0    | 0    | 122  | 24.3   | 0    | 16   | 0    | 0    |
| 697  | 546  | 633  | 589.9  | 636  | 646  | 524  | 804  |

|      |      |      |               |      |      |      |      |
|------|------|------|---------------|------|------|------|------|
| 299  | 0    | 60   | <b>134.4</b>  | 0    | 0    | 0    | 0    |
| 17   | 30   | 22   | <b>38.6</b>   | 21   | 34   | 0    | 16   |
| 67   | 50   | 61   | <b>43.7</b>   | 15   | 58   | 0    | 63   |
| 0    | 0    | 16   | <b>3.2</b>    | 0    | 0    | 0    | 0    |
| 0    | 63   | 36   | <b>36.5</b>   | 13   | 25   | 49   | 47   |
| 53   | 0    | 56   | <b>22.0</b>   | 0    | 0    | 0    | 0    |
| 29   | 112  | 102  | <b>75.8</b>   | 50   | 54   | 0    | 53   |
| 665  | 302  | 390  | <b>476.6</b>  | 764  | 1330 | 1227 | 313  |
| 2080 | 1115 | 1334 | <b>1695.3</b> | 2232 | 3526 | 2892 | 3063 |
| 0    | 0    | 51   | <b>10.1</b>   | 37   | 31   | 119  | 54   |
| 0    | 0    | 120  | <b>54.3</b>   | 0    | 0    | 0    | 51   |
| 357  | 255  | 456  | <b>460.4</b>  | 591  | 658  | 1059 | 627  |
| 0    | 67   | 86   | <b>30.6</b>   | 0    | 0    | 0    | 0    |
| 6    | 53   | 54   | <b>52.1</b>   | 16   | 17   | 23   | 57   |
| 59   | 202  | 149  | <b>175.1</b>  | 633  | 0    | 1224 | 0    |
| 255  | 196  | 234  | <b>178.7</b>  | 148  | 129  | 0    | 0    |
| 0    | 0    | 78   | <b>77.5</b>   | 0    | 0    | 0    | 254  |
| 0    | 54   | 113  | <b>33.4</b>   | 93   | 135  | 195  | 0    |
| 1102 | 988  | 1336 | <b>1268.9</b> | 1767 | 1340 | 1374 | 491  |
| 30   | 0    | 21   | <b>44.0</b>   | 0    | 155  | 53   | 62   |
| 65   | 38   | 96   | <b>67.4</b>   | 0    | 106  | 0    | 0    |
| 111  | 136  | 147  | <b>125.4</b>  | 29   | 42   | 68   | 57   |
| 128  | 0    | 253  | <b>106.4</b>  | 0    | 0    | 0    | 97   |
| 131  | 117  | 98   | <b>148.0</b>  | 301  | 199  | 314  | 330  |
| 542  | 730  | 1412 | <b>737.0</b>  | 0    | 0    | 0    | 0    |
| 71   | 120  | 100  | <b>94.9</b>   | 82   | 113  | 29   | 66   |
| 0    | 75   | 39   | <b>51.3</b>   | 0    | 0    | 6    | 0    |
| 3207 | 985  | 2684 | <b>2199.3</b> | 1242 | 2782 | 1865 | 2307 |
| 37   | 70   | 91   | <b>64.4</b>   | 0    | 163  | 0    | 37   |
| 58   | 0    | 74   | <b>26.3</b>   | 0    | 0    | 21   | 0    |
| 0    | 0    | 67   | <b>40.1</b>   | 0    | 0    | 0    | 107  |
| 54   | 39   | 19   | <b>22.5</b>   | 41   | 22   | 31   | 30   |
| 50   | 0    | 120  | <b>51.0</b>   | 0    | 0    | 0    | 188  |
| 310  | 36   | 282  | <b>187.0</b>  | 0    | 0    | 0    | 10   |
| 56   | 29   | 118  | <b>66.3</b>   | 88   | 0    | 0    | 60   |
| 108  | 55   | 101  | <b>76.4</b>   | 38   | 126  | 29   | 57   |
| 46   | 51   | 86   | <b>56.3</b>   | 20   | 37   | 28   | 42   |
| 50   | 93   | 92   | <b>76.5</b>   | 67   | 69   | 184  | 80   |
| 130  | 23   | 45   | <b>51.3</b>   | 27   | 90   | 77   | 38   |
| 0    | 22   | 35   | <b>11.4</b>   | 0    | 0    | 0    | 0    |
| 68   | 14   | 30   | <b>26.8</b>   | 32   | 79   | 70   | 389  |
| 0    | 69   | 291  | <b>144.5</b>  | 112  | 293  | 228  | 0    |
| 96   | 117  | 83   | <b>80.7</b>   | 62   | 75   | 58   | 101  |
| 2050 | 1981 | 2035 | <b>2180.6</b> | 1691 | 3534 | 3167 | 2399 |
| 67   | 73   | 81   | <b>61.5</b>   | 57   | 31   | 73   | 18   |
| 0    | 0    | 370  | <b>74.0</b>   | 511  | 0    | 0    | 413  |
| 20   | 13   | 99   | <b>44.4</b>   | 24   | 22   | 37   | 25   |
| 0    | 0    | 58   | <b>24.3</b>   | 0    | 15   | 14   | 487  |
| 374  | 208  | 110  | <b>205.7</b>  | 0    | 145  | 108  | 181  |
| 2231 | 2916 | 12   | <b>1032.0</b> | 0    | 0    | 0    | 947  |
| 0    | 0    | 65   | <b>1219.1</b> | 1347 | 0    | 1694 | 0    |
| 509  | 416  | 17   | <b>578.1</b>  | 300  | 3555 | 763  | 403  |



|      |      |      |               |       |       |       |       |
|------|------|------|---------------|-------|-------|-------|-------|
| 937  | 497  | 1198 | <b>785.3</b>  | 495   | 1698  | 131   | 1336  |
| 571  | 248  | 660  | <b>347.0</b>  | 127   | 224   | 0     | 220   |
| 0    | 0    | 61   | <b>12.1</b>   | 0     | 0     | 0     | 0     |
| 86   | 47   | 68   | <b>75.6</b>   | 37    | 59    | 50    | 51    |
| 5    | 9    | 27   | <b>19.3</b>   | 51    | 56    | 36    | 33    |
| 1255 | 736  | 1640 | <b>980.1</b>  | 373   | 711   | 19    | 242   |
| 216  | 200  | 96   | <b>117.7</b>  | 18    | 79    | 0     | 0     |
| 161  | 198  | 425  | <b>241.4</b>  | 278   | 184   | 127   | 198   |
| 397  | 280  | 486  | <b>309.8</b>  | 199   | 100   | 85    | 212   |
| 105  | 134  | 156  | <b>127.2</b>  | 100   | 118   | 126   | 172   |
| 226  | 361  | 291  | <b>239.7</b>  | 75    | 115   | 3     | 23    |
| 208  | 46   | 171  | <b>102.1</b>  | 121   | 71    | 18    | 101   |
| 190  | 197  | 289  | <b>190.7</b>  | 114   | 194   | 106   | 89    |
| 675  | 202  | 411  | <b>360.8</b>  | 115   | 1443  | 110   | 216   |
| 405  | 372  | 412  | <b>467.9</b>  | 310   | 325   | 388   | 407   |
| 109  | 128  | 109  | <b>113.9</b>  | 47    | 90    | 127   | 98    |
| 187  | 146  | 151  | <b>157.7</b>  | 49    | 155   | 112   | 162   |
| 190  | 121  | 273  | <b>195.3</b>  | 36    | 180   | 32    | 79    |
| 346  | 323  | 324  | <b>304.7</b>  | 0     | 0     | 0     | 210   |
| 57   | 0    | 82   | <b>27.8</b>   | 52    | 127   | 127   | 58    |
| 0    | 0    | 53   | <b>10.6</b>   | 0     | 0     | 72    | 48    |
| 70   | 123  | 91   | <b>112.4</b>  | 19    | 113   | 141   | 161   |
| 159  | 225  | 50   | <b>179.1</b>  | 18    | 215   | 234   | 182   |
| 20   | 28   | 14   | <b>25.1</b>   | 14    | 5     | 24    | 0     |
| 518  | 631  | 281  | <b>557.8</b>  | 242   | 327   | 402   | 90    |
| 455  | 298  | 509  | <b>369.2</b>  | 94    | 256   | 11    | 90    |
| 162  | 0    | 137  | <b>102.2</b>  | 68    | 86    | 62    | 45    |
| 640  | 476  | 307  | <b>449.8</b>  | 372   | 405   | 225   | 184   |
| 222  | 268  | 413  | <b>306.0</b>  | 87    | 102   | 34    | 128   |
| 35   | 25   | 60   | <b>55.0</b>   | 16    | 36    | 20    | 0     |
| 40   | 70   | 86   | <b>55.6</b>   | 19    | 15    | 25    | 34    |
| 61   | 80   | 156  | <b>112.1</b>  | 79    | 80    | 100   | 76    |
| 2928 | 2618 | 2936 | <b>2791.7</b> | 2210  | 2491  | 1732  | 2052  |
| 0    | 34   | 70   | <b>46.3</b>   | 34    | 34    | 27    | 18    |
| 101  | 223  | 133  | <b>105.7</b>  | 0     | 0     | 0     | 0     |
| 25   | 25   | 87   | <b>36.5</b>   | 39    | 71    | 45    | 28    |
| 107  | 171  | 65   | <b>100.5</b>  | 28    | 31    | 143   | 19    |
| 15   | 29   | 27   | <b>14.3</b>   | 0     | 12    | 0     | 0     |
| 26   | 45   | 43   | <b>27.3</b>   | 0     | 34    | 0     | 0     |
| 21   | 21   | 40   | <b>16.5</b>   | 0     | 0     | 0     | 0     |
| 19   | 21   | 55   | <b>51.3</b>   | 13    | 19    | 23    | 29    |
| 22   | 41   | 126  | <b>126.0</b>  | 66    | 52    | 75    | 130   |
| 50   | 109  | 179  | <b>179.1</b>  | 114   | 55    | 129   | 151   |
| 30   | 63   | 94   | <b>82.7</b>   | 78    | 38    | 76    | 158   |
| 0    | 1082 | 1349 | <b>486.1</b>  | 0     | 0     | 0     | 0     |
| 0    | 134  | 347  | <b>96.2</b>   | 0     | 173   | 0     | 175   |
| 0    | 0    | 4018 | <b>803.6</b>  | 0     | 0     | 0     | 0     |
| 9510 | 4892 | 6732 | <b>7253.8</b> | 11466 | 10565 | 10138 | 10907 |
| 0    | 45   | 138  | <b>36.6</b>   | 0     | 179   | 0     | 0     |
| 0    | 3    | 3    | <b>1.1</b>    | 0     | 25    | 0     | 3     |
| 0    | 21   | 50   | <b>14.2</b>   | 0     | 57    | 0     | 11    |
| 0    | 0    | 31   | <b>6.3</b>    | 0     | 35    | 0     | 0     |

|      |      |      |               |      |      |      |      |
|------|------|------|---------------|------|------|------|------|
| 0    | 33   | 51   | <b>16.9</b>   | 0    | 17   | 0    | 10   |
| 0    | 0    | 51   | <b>10.2</b>   | 0    | 8    | 0    | 19   |
| 314  | 151  | 223  | <b>175.0</b>  | 206  | 241  | 111  | 31   |
| 0    | 134  | 104  | <b>47.6</b>   | 0    | 0    | 0    | 14   |
| 162  | 50   | 155  | <b>101.7</b>  | 76   | 184  | 0    | 0    |
| 2506 | 1729 | 2420 | <b>1800.1</b> | 1932 | 2347 | 2288 | 1756 |
| 29   | 35   | 56   | <b>36.5</b>   | 41   | 17   | 18   | 11   |
| 23   | 26   | 9    | <b>11.7</b>   | 0    | 0    | 0    | 0    |
| 3    | 69   | 11   | <b>29.9</b>   | 12   | 78   | 28   | 3    |
| 46   | 19   | 25   | <b>30.6</b>   | 41   | 72   | 104  | 0    |
| 113  | 4    | 73   | <b>48.8</b>   | 5    | 42   | 0    | 0    |
| 0    | 8    | 74   | <b>19.2</b>   | 0    | 0    | 0    | 0    |
| 26   | 0    | 10   | <b>7.2</b>    | 0    | 0    | 0    | 0    |
| 296  | 163  | 218  | <b>200.4</b>  | 159  | 242  | 354  | 168  |
| 179  | 0    | 99   | <b>74.2</b>   | 0    | 197  | 313  | 0    |
| 1290 | 1093 | 1262 | <b>1081.9</b> | 1237 | 1495 | 946  | 985  |
| 0    | 0    | 377  | <b>93.9</b>   | 0    | 0    | 1287 | 0    |
| 141  | 65   | 271  | <b>164.7</b>  | 131  | 135  | 214  | 95   |
| 27   | 14   | 70   | <b>37.7</b>   | 0    | 0    | 40   | 7    |
| 0    | 0    | 20   | <b>8.9</b>    | 0    | 0    | 0    | 0    |
| 92   | 118  | 81   | <b>66.1</b>   | 0    | 45   | 0    | 32   |
| 83   | 128  | 191  | <b>128.6</b>  | 142  | 145  | 80   | 175  |
| 224  | 161  | 280  | <b>226.8</b>  | 324  | 417  | 439  | 294  |
| 276  | 0    | 381  | <b>242.9</b>  | 190  | 185  | 0    | 116  |
| 53   | 82   | 80   | <b>61.6</b>   | 58   | 60   | 0    | 18   |
| 46   | 0    | 65   | <b>22.2</b>   | 0    | 0    | 0    | 56   |
| 0    | 0    | 64   | <b>12.9</b>   | 20   | 0    | 0    | 15   |
| 158  | 138  | 132  | <b>142.7</b>  | 163  | 165  | 198  | 231  |
| 15   | 20   | 22   | <b>25.2</b>   | 40   | 29   | 83   | 0    |
| 470  | 557  | 489  | <b>460.2</b>  | 480  | 489  | 359  | 529  |
| 65   | 60   | 45   | <b>38.2</b>   | 0    | 49   | 0    | 0    |
| 3227 | 7076 | 6467 | <b>5839.5</b> | 9410 | 7525 | 6873 | 8342 |
| 280  | 491  | 287  | <b>361.5</b>  | 369  | 325  | 0    | 155  |
| 83   | 0    | 64   | <b>59.3</b>   | 52   | 60   | 51   | 21   |
| 186  | 118  | 238  | <b>170.0</b>  | 55   | 83   | 86   | 41   |
| 60   | 35   | 113  | <b>73.0</b>   | 88   | 122  | 131  | 161  |
| 0    | 0    | 81   | <b>16.2</b>   | 0    | 0    | 64   | 94   |
| 0    | 87   | 261  | <b>69.6</b>   | 0    | 0    | 22   | 0    |
| 616  | 618  | 762  | <b>510.6</b>  | 486  | 565  | 430  | 500  |
| 0    | 0    | 66   | <b>13.2</b>   | 0    | 32   | 0    | 13   |
| 0    | 0    | 39   | <b>7.9</b>    | 0    | 19   | 0    | 40   |
| 133  | 139  | 394  | <b>209.6</b>  | 149  | 149  | 174  | 275  |
| 30   | 0    | 59   | <b>32.3</b>   | 39   | 37   | 0    | 79   |
| 80   | 61   | 63   | <b>60.9</b>   | 25   | 37   | 0    | 0    |
| 74   | 0    | 48   | <b>24.6</b>   | 0    | 0    | 0    | 6    |
| 0    | 0    | 125  | <b>52.3</b>   | 179  | 0    | 0    | 0    |
| 151  | 221  | 408  | <b>280.1</b>  | 263  | 253  | 379  | 434  |
| 58   | 113  | 62   | <b>81.2</b>   | 146  | 72   | 44   | 122  |
| 524  | 0    | 1049 | <b>344.4</b>  | 0    | 0    | 30   | 0    |
| 39   | 63   | 74   | <b>59.3</b>   | 39   | 0    | 81   | 0    |
| 54   | 56   | 79   | <b>37.8</b>   | 74   | 44   | 220  | 311  |
| 212  | 98   | 152  | <b>151.3</b>  | 262  | 220  | 238  | 84   |

|       |       |       |               |      |      |      |      |
|-------|-------|-------|---------------|------|------|------|------|
| 71    | 134   | 44    | <b>69.1</b>   | 78   | 269  | 151  | 0    |
| 0     | 126   | 85    | <b>54.2</b>   | 0    | 0    | 224  | 71   |
| 23    | 80    | 152   | <b>51.1</b>   | 0    | 0    | 0    | 0    |
| 0     | 0     | 116   | <b>35.7</b>   | 73   | 60   | 148  | 50   |
| 0     | 335   | 89    | <b>114.8</b>  | 134  | 55   | 0    | 0    |
| 126   | 122   | 171   | <b>129.1</b>  | 38   | 52   | 103  | 61   |
| 28    | 28    | 46    | <b>40.2</b>   | 37   | 36   | 31   | 31   |
| 81    | 29    | 62    | <b>46.4</b>   | 35   | 47   | 79   | 53   |
| 58    | 67    | 88    | <b>72.0</b>   | 20   | 37   | 0    | 11   |
| 142   | 6     | 73    | <b>78.1</b>   | 90   | 80   | 96   | 0    |
| 43    | 21    | 57    | <b>29.2</b>   | 18   | 62   | 27   | 0    |
| 0     | 87    | 87    | <b>34.9</b>   | 41   | 19   | 44   | 66   |
| 121   | 74    | 71    | <b>90.9</b>   | 128  | 0    | 0    | 0    |
| 153   | 137   | 254   | <b>142.6</b>  | 46   | 129  | 152  | 106  |
| 743   | 415   | 707   | <b>590.4</b>  | 597  | 775  | 799  | 592  |
| 37    | 44    | 55    | <b>27.3</b>   | 0    | 0    | 0    | 0    |
| 9     | 48    | 33    | <b>37.5</b>   | 27   | 84   | 34   | 0    |
| 279   | 75    | 90    | <b>115.8</b>  | 128  | 117  | 60   | 0    |
| 178   | 200   | 319   | <b>205.2</b>  | 137  | 239  | 74   | 22   |
| 214   | 93    | 274   | <b>156.1</b>  | 157  | 393  | 131  | 0    |
| 99    | 75    | 258   | <b>96.2</b>   | 112  | 164  | 0    | 114  |
| 292   | 290   | 356   | <b>271.8</b>  | 0    | 108  | 64   | 38   |
| 688   | 551   | 771   | <b>556.7</b>  | 265  | 288  | 148  | 208  |
| 72    | 0     | 82    | <b>68.6</b>   | 72   | 0    | 0    | 51   |
| 793   | 780   | 861   | <b>687.3</b>  | 736  | 935  | 794  | 496  |
| 527   | 331   | 597   | <b>374.5</b>  | 478  | 570  | 0    | 201  |
| 0     | 99    | 311   | <b>99.1</b>   | 117  | 55   | 59   | 572  |
| 641   | 320   | 912   | <b>532.6</b>  | 600  | 506  | 22   | 0    |
| 0     | 0     | 140   | <b>50.8</b>   | 153  | 135  | 135  | 48   |
| 175   | 101   | 279   | <b>136.8</b>  | 5    | 112  | 0    | 30   |
| 1705  | 973   | 1002  | <b>1134.6</b> | 709  | 456  | 394  | 632  |
| 74    | 78    | 120   | <b>61.5</b>   | 0    | 0    | 0    | 0    |
| 0     | 0     | 38    | <b>7.6</b>    | 0    | 0    | 0    | 0    |
| 754   | 581   | 1134  | <b>672.1</b>  | 485  | 326  | 439  | 242  |
| 117   | 328   | 207   | <b>281.1</b>  | 526  | 436  | 266  | 793  |
| 0     | 154   | 185   | <b>128.5</b>  | 0    | 0    | 0    | 0    |
| 0     | 0     | 68    | <b>16.8</b>   | 99   | 0    | 0    | 0    |
| 346   | 172   | 382   | <b>262.1</b>  | 234  | 348  | 79   | 255  |
| 4043  | 4051  | 4554  | <b>3721.2</b> | 2678 | 2624 | 2597 | 1994 |
| 0     | 48    | 69    | <b>28.5</b>   | 0    | 0    | 0    | 0    |
| 0     | 53    | 31    | <b>16.8</b>   | 0    | 0    | 0    | 22   |
| 130   | 483   | 864   | <b>389.3</b>  | 0    | 0    | 31   | 0    |
| 120   | 215   | 258   | <b>118.7</b>  | 80   | 78   | 0    | 5    |
| 5230  | 4742  | 6983  | <b>4321.8</b> | 4321 | 5333 | 3024 | 1252 |
| 1226  | 1218  | 1306  | <b>1159.2</b> | 1312 | 1436 | 972  | 1264 |
| 97    | 143   | 116   | <b>84.1</b>   | 121  | 303  | 0    | 0    |
| 12897 | 11211 | 11351 | <b>9575.8</b> | 9486 | 5738 | 7282 | 4077 |
| 0     | 57    | 62    | <b>23.7</b>   | 0    | 0    | 186  | 22   |
| 0     | 0     | 156   | <b>31.2</b>   | 80   | 61   | 32   | 0    |
| 0     | 0     | 79    | <b>38.5</b>   | 0    | 0    | 0    | 0    |
| 0     | 0     | 287   | <b>57.4</b>   | 225  | 310  | 838  | 233  |
| 1255  | 1067  | 1249  | <b>1082.1</b> | 972  | 1222 | 1221 | 755  |

|      |       |       |                |      |       |       |      |
|------|-------|-------|----------------|------|-------|-------|------|
| 8362 | 10682 | 20813 | <b>11558.1</b> | 9964 | 11044 | 19190 | 9945 |
| 0    | 0     | 35    | <b>35.9</b>    | 0    | 0     | 0     | 16   |
| 0    | 0     | 116   | <b>23.3</b>    | 33   | 82    | 0     | 0    |
| 57   | 48    | 59    | <b>53.7</b>    | 41   | 57    | 63    | 45   |
| 0    | 51    | 47    | <b>36.0</b>    | 230  | 0     | 150   | 215  |
| 112  | 368   | 219   | <b>239.7</b>   | 248  | 105   | 86    | 272  |
| 151  | 371   | 262   | <b>207.0</b>   | 133  | 179   | 0     | 245  |
| 29   | 48    | 57    | <b>51.7</b>    | 29   | 33    | 30    | 45   |
| 22   | 24    | 28    | <b>27.9</b>    | 0    | 20    | 0     | 25   |
| 0    | 79    | 26    | <b>31.2</b>    | 0    | 0     | 0     | 52   |
| 127  | 216   | 180   | <b>159.5</b>   | 107  | 150   | 45    | 118  |
| 54   | 67    | 116   | <b>67.7</b>    | 0    | 48    | 0     | 55   |
| 0    | 0     | 36    | <b>7.3</b>     | 0    | 0     | 0     | 0    |
| 76   | 107   | 213   | <b>85.7</b>    | 113  | 0     | 139   | 57   |
| 0    | 0     | 38    | <b>7.7</b>     | 17   | 0     | 0     | 20   |
| 82   | 156   | 293   | <b>142.5</b>   | 114  | 99    | 43    | 32   |
| 156  | 172   | 253   | <b>162.2</b>   | 91   | 196   | 166   | 89   |
| 39   | 90    | 158   | <b>122.4</b>   | 106  | 49    | 128   | 171  |
| 25   | 61    | 82    | <b>71.2</b>    | 68   | 29    | 65    | 110  |
| 79   | 0     | 205   | <b>81.9</b>    | 0    | 0     | 0     | 0    |
| 0    | 0     | 219   | <b>43.8</b>    | 0    | 0     | 0     | 0    |
| 0    | 63    | 257   | <b>63.9</b>    | 100  | 52    | 16    | 78   |
| 0    | 0     | 41    | <b>8.2</b>     | 0    | 0     | 0     | 55   |
| 0    | 0     | 23    | <b>4.6</b>     | 0    | 0     | 4     | 15   |
| 6308 | 4962  | 6249  | <b>5435.1</b>  | 5955 | 7270  | 6222  | 3716 |
| 0    | 0     | 483   | <b>96.7</b>    | 0    | 0     | 0     | 0    |
| 1622 | 954   | 1328  | <b>1296.3</b>  | 1520 | 2081  | 2127  | 990  |
| 1309 | 1053  | 2509  | <b>1801.3</b>  | 1907 | 2035  | 1922  | 2534 |
| 339  | 264   | 731   | <b>507.6</b>   | 499  | 543   | 662   | 942  |
| 299  | 248   | 658   | <b>325.3</b>   | 519  | 589   | 624   | 1096 |
| 0    | 138   | 167   | <b>86.7</b>    | 95   | 166   | 220   | 90   |
| 0    | 0     | 48    | <b>13.6</b>    | 0    | 0     | 0     | 0    |
| 48   | 10    | 15    | <b>20.5</b>    | 22   | 5     | 21    | 8    |
| 0    | 0     | 15    | <b>5.5</b>     | 0    | 0     | 11    | 7    |
| 30   | 8     | 18    | <b>16.7</b>    | 22   | 39    | 72    | 1    |
| 0    | 16    | 20    | <b>7.9</b>     | 40   | 0     | 41    | 13   |
| 0    | 0     | 74    | <b>14.8</b>    | 0    | 0     | 0     | 0    |
| 0    | 121   | 201   | <b>75.7</b>    | 45   | 0     | 1     | 0    |
| 482  | 980   | 889   | <b>662.6</b>   | 954  | 1033  | 1287  | 781  |
| 36   | 0     | 99    | <b>36.6</b>    | 36   | 42    | 178   | 71   |
| 1078 | 915   | 959   | <b>944.2</b>   | 1185 | 1152  | 1350  | 861  |
| 107  | 0     | 204   | <b>99.8</b>    | 216  | 228   | 420   | 131  |
| 0    | 0     | 18    | <b>3.5</b>     | 0    | 0     | 0     | 0    |
| 172  | 193   | 444   | <b>259.3</b>   | 201  | 249   | 864   | 428  |
| 77   | 81    | 126   | <b>112.1</b>   | 82   | 124   | 127   | 50   |
| 34   | 0     | 101   | <b>33.5</b>    | 0    | 36    | 63    | 34   |
| 683  | 548   | 670   | <b>568.5</b>   | 631  | 686   | 432   | 454  |
| 89   | 64    | 228   | <b>119.5</b>   | 115  | 246   | 594   | 269  |
| 2049 | 1310  | 2274  | <b>1979.8</b>  | 2281 | 2851  | 4297  | 2841 |
| 137  | 191   | 305   | <b>178.1</b>   | 77   | 225   | 963   | 0    |
| 0    | 83    | 53    | <b>54.3</b>    | 51   | 55    | 147   | 30   |
| 24   | 59    | 128   | <b>65.6</b>    | 57   | 74    | 82    | 59   |

|      |      |      |               |      |      |      |      |
|------|------|------|---------------|------|------|------|------|
| 298  | 327  | 289  | <b>329.2</b>  | 353  | 433  | 541  | 447  |
| 349  | 214  | 150  | <b>220.5</b>  | 124  | 247  | 240  | 209  |
| 59   | 49   | 64   | <b>56.7</b>   | 60   | 90   | 81   | 43   |
| 56   | 52   | 55   | <b>51.7</b>   | 44   | 44   | 171  | 117  |
| 494  | 349  | 360  | <b>355.6</b>  | 368  | 416  | 321  | 477  |
| 103  | 85   | 81   | <b>95.3</b>   | 63   | 123  | 71   | 0    |
| 94   | 61   | 84   | <b>81.6</b>   | 20   | 55   | 176  | 0    |
| 146  | 139  | 212  | <b>184.3</b>  | 197  | 247  | 411  | 208  |
| 707  | 382  | 944  | <b>868.9</b>  | 734  | 656  | 0    | 333  |
| 163  | 118  | 124  | <b>138.7</b>  | 78   | 119  | 213  | 179  |
| 58   | 42   | 46   | <b>38.9</b>   | 62   | 65   | 41   | 0    |
| 99   | 50   | 40   | <b>48.1</b>   | 51   | 50   | 75   | 0    |
| 0    | 58   | 58   | <b>35.1</b>   | 0    | 0    | 79   | 0    |
| 0    | 44   | 44   | <b>32.7</b>   | 0    | 0    | 0    | 0    |
| 0    | 67   | 26   | <b>18.6</b>   | 0    | 22   | 120  | 0    |
| 0    | 15   | 15   | <b>7.4</b>    | 7    | 0    | 0    | 0    |
| 0    | 58   | 38   | <b>57.0</b>   | 0    | 0    | 0    | 12   |
| 260  | 112  | 236  | <b>158.6</b>  | 55   | 210  | 82   | 75   |
| 83   | 0    | 145  | <b>116.2</b>  | 0    | 0    | 132  | 0    |
| 0    | 0    | 63   | <b>38.9</b>   | 0    | 98   | 60   | 0    |
| 0    | 111  | 89   | <b>55.0</b>   | 143  | 65   | 214  | 0    |
| 703  | 1203 | 642  | <b>839.2</b>  | 901  | 938  | 1045 | 639  |
| 40   | 89   | 73   | <b>52.8</b>   | 85   | 91   | 181  | 9    |
| 127  | 0    | 56   | <b>52.5</b>   | 54   | 49   | 201  | 72   |
| 61   | 370  | 86   | <b>157.9</b>  | 142  | 108  | 380  | 0    |
| 178  | 157  | 202  | <b>165.0</b>  | 132  | 173  | 141  | 151  |
| 28   | 19   | 44   | <b>21.7</b>   | 14   | 9    | 8    | 13   |
| 0    | 0    | 76   | <b>15.2</b>   | 54   | 0    | 109  | 144  |
| 70   | 115  | 91   | <b>89.5</b>   | 136  | 91   | 146  | 68   |
| 77   | 54   | 75   | <b>52.4</b>   | 58   | 13   | 46   | 49   |
| 53   | 9    | 89   | <b>52.7</b>   | 61   | 86   | 115  | 66   |
| 37   | 28   | 53   | <b>30.2</b>   | 41   | 42   | 165  | 0    |
| 49   | 57   | 18   | <b>33.4</b>   | 21   | 11   | 62   | 24   |
| 788  | 859  | 1161 | <b>963.7</b>  | 840  | 809  | 977  | 1202 |
| 54   | 49   | 77   | <b>44.0</b>   | 38   | 8    | 134  | 30   |
| 26   | 45   | 60   | <b>41.3</b>   | 8    | 15   | 0    | 53   |
| 539  | 717  | 820  | <b>737.6</b>  | 761  | 1047 | 1183 | 1091 |
| 81   | 51   | 88   | <b>60.3</b>   | 18   | 48   | 56   | 40   |
| 0    | 0    | 117  | <b>23.4</b>   | 0    | 0    | 200  | 0    |
| 0    | 0    | 50   | <b>12.6</b>   | 0    | 0    | 0    | 0    |
| 39   | 248  | 235  | <b>145.7</b>  | 409  | 207  | 183  | 196  |
| 0    | 0    | 124  | <b>24.9</b>   | 136  | 104  | 0    | 0    |
| 0    | 18   | 51   | <b>41.2</b>   | 0    | 0    | 178  | 94   |
| 448  | 239  | 355  | <b>232.0</b>  | 256  | 165  | 37   | 121  |
| 116  | 103  | 256  | <b>150.4</b>  | 147  | 237  | 0    | 110  |
| 2591 | 2477 | 4114 | <b>3294.3</b> | 3129 | 3746 | 3118 | 2468 |
| 29   | 27   | 49   | <b>53.8</b>   | 38   | 52   | 164  | 52   |
| 17   | 181  | 340  | <b>499.9</b>  | 0    | 0    | 0    | 179  |
| 93   | 251  | 401  | <b>206.4</b>  | 642  | 636  | 434  | 0    |
| 168  | 135  | 70   | <b>85.8</b>   | 105  | 58   | 212  | 75   |
| 217  | 0    | 33   | <b>63.2</b>   | 104  | 100  | 92   | 73   |
| 0    | 28   | 28   | <b>78.6</b>   | 0    | 34   | 31   | 0    |

|      |      |      |               |      |      |      |      |
|------|------|------|---------------|------|------|------|------|
| 0    | 0    | 252  | <b>65.1</b>   | 0    | 0    | 8    | 0    |
| 487  | 0    | 569  | <b>252.8</b>  | 0    | 324  | 0    | 0    |
| 0    | 0    | 53   | <b>15.5</b>   | 0    | 0    | 0    | 0    |
| 166  | 0    | 109  | <b>108.8</b>  | 0    | 0    | 71   | 0    |
| 0    | 0    | 73   | <b>14.5</b>   | 274  | 234  | 301  | 0    |
| 1812 | 2125 | 1989 | <b>1753.8</b> | 2066 | 2392 | 1262 | 2613 |
| 104  | 0    | 710  | <b>247.4</b>  | 0    | 0    | 2240 | 0    |
| 65   | 42   | 52   | <b>56.4</b>   | 86   | 76   | 119  | 78   |
| 403  | 321  | 324  | <b>285.4</b>  | 264  | 0    | 266  | 595  |
| 99   | 122  | 131  | <b>186.0</b>  | 113  | 125  | 197  | 212  |
| 1997 | 2440 | 2517 | <b>2238.7</b> | 2236 | 2572 | 4054 | 2845 |
| 42   | 0    | 246  | <b>92.4</b>   | 120  | 129  | 157  | 51   |
| 0    | 0    | 84   | <b>16.8</b>   | 0    | 0    | 233  | 72   |
| 0    | 38   | 33   | <b>715.9</b>  | 62   | 80   | 113  | 88   |
| 70   | 81   | 69   | <b>113.9</b>  | 104  | 121  | 152  | 101  |
| 0    | 0    | 29   | <b>12.4</b>   | 0    | 31   | 108  | 55   |
| 83   | 54   | 82   | <b>56.7</b>   | 97   | 93   | 236  | 11   |
| 41   | 78   | 131  | <b>97.7</b>   | 12   | 98   | 311  | 87   |
| 0    | 0    | 119  | <b>23.9</b>   | 0    | 0    | 0    | 7    |
| 133  | 371  | 153  | <b>131.5</b>  | 0    | 136  | 0    | 0    |
| 120  | 202  | 252  | <b>169.5</b>  | 194  | 0    | 245  | 273  |
| 0    | 0    | 29   | <b>14.9</b>   | 0    | 0    | 104  | 34   |
| 55   | 57   | 85   | <b>61.4</b>   | 64   | 0    | 107  | 68   |
| 211  | 96   | 67   | <b>113.9</b>  | 72   | 65   | 500  | 0    |
| 30   | 88   | 54   | <b>45.0</b>   | 34   | 60   | 29   | 0    |
| 137  | 248  | 367  | <b>233.1</b>  | 222  | 289  | 384  | 408  |
| 110  | 127  | 318  | <b>250.0</b>  | 0    | 0    | 555  | 282  |
| 0    | 0    | 43   | <b>8.5</b>    | 0    | 0    | 157  | 0    |
| 131  | 114  | 202  | <b>150.3</b>  | 61   | 244  | 121  | 132  |
| 22   | 12   | 28   | <b>41.0</b>   | 15   | 60   | 28   | 0    |
| 103  | 104  | 93   | <b>77.5</b>   | 94   | 140  | 204  | 182  |
| 0    | 0    | 71   | <b>28.3</b>   | 0    | 50   | 162  | 25   |
| 12   | 47   | 39   | <b>34.7</b>   | 15   | 70   | 58   | 25   |
| 31   | 51   | 58   | <b>28.9</b>   | 47   | 41   | 110  | 35   |
| 3    | 43   | 30   | <b>15.2</b>   | 0    | 0    | 0    | 1    |
| 0    | 0    | 41   | <b>22.6</b>   | 0    | 0    | 0    | 0    |
| 178  | 117  | 570  | <b>285.5</b>  | 126  | 0    | 0    | 50   |
| 0    | 16   | 27   | <b>10.0</b>   | 6    | 21   | 47   | 19   |
| 25   | 29   | 31   | <b>25.7</b>   | 23   | 37   | 50   | 30   |
| 0    | 0    | 28   | <b>5.7</b>    | 0    | 0    | 52   | 72   |
| 0    | 0    | 253  | <b>91.1</b>   | 0    | 0    | 0    | 0    |
| 0    | 0    | 53   | <b>10.5</b>   | 0    | 0    | 0    | 0    |
| 0    | 0    | 579  | <b>115.8</b>  | 0    | 0    | 0    | 0    |
| 0    | 521  | 654  | <b>316.5</b>  | 702  | 996  | 825  | 722  |
| 0    | 0    | 38   | <b>22.8</b>   | 55   | 90   | 107  | 104  |
| 0    | 57   | 65   | <b>24.4</b>   | 0    | 0    | 0    | 0    |
| 0    | 11   | 83   | <b>20.9</b>   | 32   | 11   | 171  | 31   |
| 227  | 186  | 259  | <b>199.9</b>  | 322  | 376  | 371  | 128  |
| 927  | 966  | 1795 | <b>1318.1</b> | 1487 | 1721 | 1856 | 1834 |
| 0    | 0    | 96   | <b>19.2</b>   | 306  | 0    | 0    | 0    |
| 178  | 281  | 410  | <b>268.5</b>  | 305  | 192  | 0    | 265  |
| 0    | 49   | 88   | <b>65.5</b>   | 134  | 162  | 121  | 17   |

|      |      |      |               |      |      |      |      |
|------|------|------|---------------|------|------|------|------|
| 269  | 325  | 429  | <b>351.5</b>  | 545  | 561  | 574  | 73   |
| 0    | 55   | 209  | <b>52.7</b>   | 0    | 0    | 203  | 0    |
| 44   | 31   | 22   | <b>30.2</b>   | 37   | 72   | 59   | 14   |
| 0    | 0    | 45   | <b>9.0</b>    | 0    | 0    | 50   | 78   |
| 1413 | 840  | 2221 | <b>1671.0</b> | 1670 | 1917 | 3134 | 1222 |
| 447  | 286  | 438  | <b>365.3</b>  | 401  | 480  | 712  | 279  |
| 87   | 0    | 109  | <b>54.6</b>   | 100  | 28   | 21   | 84   |
| 0    | 0    | 101  | <b>20.2</b>   | 0    | 0    | 7    | 0    |
| 280  | 224  | 347  | <b>264.2</b>  | 356  | 378  | 1084 | 304  |
| 0    | 0    | 273  | <b>82.2</b>   | 292  | 86   | 257  | 74   |
| 2729 | 2195 | 3610 | <b>2799.7</b> | 1584 | 1514 | 1288 | 1508 |
| 179  | 106  | 194  | <b>129.0</b>  | 178  | 171  | 185  | 148  |
| 0    | 0    | 38   | <b>7.6</b>    | 0    | 0    | 0    | 0    |
| 186  | 250  | 320  | <b>273.8</b>  | 250  | 260  | 605  | 254  |
| 1339 | 1226 | 1310 | <b>1179.7</b> | 1146 | 1171 | 964  | 480  |
| 0    | 0    | 225  | <b>45.1</b>   | 28   | 0    | 0    | 0    |
| 261  | 211  | 653  | <b>366.5</b>  | 444  | 442  | 782  | 609  |
| 46   | 81   | 70   | <b>55.8</b>   | 92   | 73   | 110  | 36   |
| 0    | 0    | 107  | <b>21.3</b>   | 121  | 88   | 86   | 31   |
| 1926 | 1871 | 2332 | <b>2060.9</b> | 2057 | 2347 | 2528 | 2751 |
| 741  | 580  | 672  | <b>630.5</b>  | 712  | 759  | 624  | 184  |
| 0    | 0    | 136  | <b>27.2</b>   | 80   | 60   | 69   | 28   |
| 93   | 102  | 142  | <b>137.7</b>  | 174  | 45   | 223  | 318  |
| 307  | 302  | 334  | <b>310.1</b>  | 401  | 328  | 288  | 383  |
| 153  | 199  | 394  | <b>281.4</b>  | 407  | 299  | 397  | 647  |
| 0    | 0    | 254  | <b>50.7</b>   | 0    | 0    | 153  | 0    |
| 126  | 100  | 138  | <b>122.3</b>  | 139  | 33   | 167  | 341  |
| 0    | 0    | 52   | <b>14.4</b>   | 79   | 0    | 60   | 0    |
| 0    | 0    | 123  | <b>40.2</b>   | 0    | 0    | 60   | 26   |
| 459  | 394  | 776  | <b>578.9</b>  | 555  | 525  | 773  | 797  |
| 109  | 75   | 24   | <b>41.7</b>   | 0    | 0    | 0    | 42   |
| 31   | 22   | 32   | <b>33.9</b>   | 40   | 81   | 105  | 59   |
| 153  | 252  | 269  | <b>196.5</b>  | 229  | 207  | 236  | 297  |
| 131  | 131  | 318  | <b>262.7</b>  | 322  | 221  | 382  | 0    |
| 1807 | 2692 | 2978 | <b>2638.1</b> | 2839 | 2792 | 3070 | 3329 |
| 0    | 0    | 76   | <b>37.7</b>   | 38   | 0    | 76   | 0    |
| 0    | 0    | 21   | <b>10.6</b>   | 6    | 5    | 32   | 79   |
| 7    | 10   | 26   | <b>11.6</b>   | 28   | 42   | 39   | 14   |
| 0    | 5    | 31   | <b>12.5</b>   | 15   | 25   | 0    | 25   |
| 53   | 25   | 93   | <b>39.0</b>   | 65   | 31   | 14   | 77   |
| 0    | 0    | 11   | <b>7.1</b>    | 7    | 6    | 37   | 54   |
| 1255 | 1067 | 1116 | <b>1496.4</b> | 1347 | 1662 | 1520 | 1573 |
| 477  | 1254 | 1439 | <b>725.8</b>  | 736  | 549  | 1060 | 282  |
| 326  | 307  | 392  | <b>430.5</b>  | 946  | 735  | 351  | 303  |
| 37   | 138  | 88   | <b>52.6</b>   | 214  | 38   | 66   | 30   |
| 0    | 0    | 370  | <b>165.4</b>  | 0    | 249  | 703  | 451  |
| 1031 | 1519 | 1645 | <b>1077.5</b> | 1528 | 759  | 0    | 225  |
| 105  | 109  | 82   | <b>59.1</b>   | 123  | 0    | 77   | 0    |
| 361  | 1056 | 657  | <b>721.3</b>  | 879  | 522  | 679  | 605  |
| 82   | 135  | 183  | <b>161.4</b>  | 175  | 190  | 218  | 238  |
| 4181 | 5385 | 5523 | <b>4892.2</b> | 5204 | 3530 | 3816 | 4644 |
| 100  | 96   | 111  | <b>349.8</b>  | 69   | 122  | 0    | 73   |

|      |      |      |               |      |      |      |      |
|------|------|------|---------------|------|------|------|------|
| 438  | 608  | 1396 | <b>860.2</b>  | 737  | 777  | 1458 | 987  |
| 65   | 121  | 142  | <b>109.5</b>  | 165  | 141  | 254  | 0    |
| 0    | 0    | 91   | <b>39.0</b>   | 46   | 42   | 107  | 127  |
| 26   | 63   | 199  | <b>91.6</b>   | 48   | 116  | 270  | 213  |
| 0    | 110  | 299  | <b>87.4</b>   | 0    | 0    | 0    | 100  |
| 238  | 268  | 303  | <b>242.6</b>  | 277  | 177  | 135  | 197  |
| 0    | 0    | 21   | <b>4.2</b>    | 0    | 0    | 0    | 22   |
| 0    | 0    | 251  | <b>50.3</b>   | 14   | 3    | 0    | 0    |
| 0    | 33   | 30   | <b>29.2</b>   | 27   | 26   | 81   | 41   |
| 1297 | 2053 | 4362 | <b>2666.0</b> | 1702 | 2205 | 3717 | 3746 |
| 0    | 0    | 757  | <b>151.3</b>  | 650  | 372  | 999  | 0    |
| 419  | 796  | 636  | <b>684.9</b>  | 0    | 279  | 206  | 0    |
| 0    | 0    | 135  | <b>107.3</b>  | 0    | 0    | 89   | 33   |
| 108  | 95   | 96   | <b>88.3</b>   | 61   | 101  | 127  | 574  |
| 90   | 193  | 252  | <b>168.7</b>  | 238  | 279  | 188  | 0    |
| 22   | 169  | 42   | <b>55.8</b>   | 19   | 23   | 318  | 480  |
| 48   | 70   | 68   | <b>62.9</b>   | 66   | 80   | 99   | 117  |
| 256  | 393  | 357  | <b>311.2</b>  | 368  | 366  | 361  | 576  |
| 146  | 208  | 229  | <b>185.8</b>  | 192  | 190  | 331  | 260  |
| 0    | 0    | 33   | <b>6.6</b>    | 0    | 21   | 48   | 20   |
| 0    | 24   | 32   | <b>11.1</b>   | 0    | 0    | 116  | 88   |
| 2    | 34   | 83   | <b>44.9</b>   | 44   | 52   | 142  | 157  |
| 201  | 261  | 383  | <b>296.6</b>  | 292  | 182  | 477  | 399  |
| 0    | 83   | 80   | <b>66.5</b>   | 60   | 45   | 48   | 58   |
| 0    | 38   | 16   | <b>18.4</b>   | 0    | 0    | 17   | 239  |
| 31   | 79   | 69   | <b>67.8</b>   | 31   | 94   | 125  | 114  |
| 539  | 1011 | 895  | <b>831.2</b>  | 874  | 825  | 722  | 1128 |
| 0    | 0    | 28   | <b>11.0</b>   | 65   | 8    | 0    | 72   |
| 0    | 56   | 46   | <b>38.0</b>   | 23   | 23   | 70   | 0    |
| 0    | 0    | 52   | <b>17.6</b>   | 0    | 28   | 110  | 47   |
| 9    | 126  | 50   | <b>61.8</b>   | 63   | 63   | 97   | 322  |
| 108  | 554  | 416  | <b>366.9</b>  | 368  | 285  | 342  | 406  |
| 249  | 236  | 223  | <b>236.5</b>  | 0    | 0    | 131  | 148  |
| 158  | 144  | 238  | <b>172.3</b>  | 230  | 0    | 0    | 0    |
| 439  | 734  | 695  | <b>462.7</b>  | 647  | 441  | 267  | 403  |
| 5    | 12   | 20   | <b>11.7</b>   | 8    | 24   | 15   | 0    |
| 28   | 57   | 49   | <b>44.1</b>   | 35   | 49   | 67   | 62   |
| 306  | 1232 | 1317 | <b>827.2</b>  | 126  | 869  | 482  | 1109 |
| 13   | 81   | 133  | <b>70.8</b>   | 42   | 46   | 58   | 111  |
| 38   | 57   | 140  | <b>84.5</b>   | 68   | 86   | 154  | 214  |
| 0    | 32   | 116  | <b>51.8</b>   | 23   | 47   | 60   | 79   |
| 0    | 44   | 79   | <b>24.6</b>   | 0    | 0    | 0    | 0    |
| 7    | 14   | 97   | <b>38.2</b>   | 36   | 29   | 207  | 56   |
| 0    | 54   | 40   | <b>18.8</b>   | 0    | 0    | 0    | 0    |
| 0    | 470  | 610  | <b>469.2</b>  | 0    | 0    | 0    | 0    |
| 572  | 1128 | 990  | <b>688.4</b>  | 688  | 930  | 762  | 1755 |
| 63   | 230  | 389  | <b>244.2</b>  | 183  | 178  | 193  | 378  |
| 0    | 0    | 26   | <b>10.4</b>   | 13   | 0    | 25   | 0    |
| 0    | 290  | 3457 | <b>749.3</b>  | 0    | 0    | 30   | 0    |
| 0    | 0    | 108  | <b>40.7</b>   | 22   | 48   | 42   | 64   |
| 1039 | 897  | 2492 | <b>1146.0</b> | 1163 | 1284 | 1357 | 1147 |
| 959  | 729  | 872  | <b>714.7</b>  | 969  | 1166 | 1467 | 908  |



|      |      |      |               |      |       |      |       |
|------|------|------|---------------|------|-------|------|-------|
| 0    | 0    | 73   | <b>31.2</b>   | 0    | 0     | 84   | 195   |
| 107  | 139  | 395  | <b>128.1</b>  | 352  | 0     | 126  | 66    |
| 42   | 81   | 105  | <b>93.7</b>   | 72   | 154   | 131  | 2     |
| 3312 | 3841 | 6116 | <b>4881.9</b> | 5384 | 5506  | 6032 | 6048  |
| 388  | 1347 | 923  | <b>531.7</b>  | 163  | 1382  | 201  | 118   |
| 1178 | 1270 | 1152 | <b>1134.6</b> | 1438 | 1732  | 1482 | 1797  |
| 9086 | 7894 | 9186 | <b>9048.3</b> | 9122 | 11967 | 5487 | 10907 |
| 314  | 180  | 335  | <b>280.3</b>  | 219  | 437   | 501  | 112   |
| 3156 | 885  | 1292 | <b>1333.8</b> | 3508 | 916   | 378  | 383   |
| 226  | 205  | 169  | <b>178.1</b>  | 247  | 78    | 133  | 396   |
| 690  | 548  | 609  | <b>634.1</b>  | 709  | 447   | 758  | 915   |
| 0    | 0    | 900  | <b>179.9</b>  | 0    | 0     | 0    | 0     |
| 1522 | 1752 | 1747 | <b>1643.9</b> | 1720 | 1863  | 1644 | 1491  |
| 3489 | 3231 | 2990 | <b>3110.4</b> | 2744 | 3976  | 3486 | 3440  |
| 0    | 981  | 522  | <b>801.6</b>  | 1136 | 664   | 953  | 1116  |
| 0    | 0    | 340  | <b>68.1</b>   | 0    | 0     | 0    | 0     |
| 57   | 664  | 148  | <b>287.2</b>  | 276  | 0     | 364  | 0     |
| 59   | 73   | 41   | <b>58.4</b>   | 91   | 93    | 124  | 75    |
| 0    | 703  | 185  | <b>189.0</b>  | 0    | 246   | 0    | 59    |
| 0    | 129  | 107  | <b>204.0</b>  | 2151 | 0     | 0    | 102   |
| 64   | 0    | 59   | <b>37.1</b>   | 65   | 119   | 108  | 108   |
| 734  | 1279 | 1206 | <b>1144.4</b> | 0    | 0     | 2531 | 1178  |
| 331  | 478  | 809  | <b>499.9</b>  | 495  | 343   | 686  | 175   |
| 0    | 0    | 1334 | <b>266.9</b>  | 0    | 0     | 0    | 0     |
| 1558 | 935  | 855  | <b>941.9</b>  | 522  | 0     | 0    | 584   |
| 2273 | 2714 | 1379 | <b>2577.6</b> | 2268 | 3190  | 3525 | 2986  |
| 0    | 114  | 173  | <b>79.3</b>   | 0    | 0     | 77   | 68    |
| 0    | 0    | 21   | <b>14.2</b>   | 0    | 0     | 35   | 81    |
| 208  | 173  | 187  | <b>158.8</b>  | 0    | 166   | 0    | 37    |
| 68   | 298  | 281  | <b>226.0</b>  | 218  | 220   | 377  | 432   |
| 71   | 71   | 121  | <b>100.2</b>  | 64   | 0     | 85   | 0     |
| 5632 | 4973 | 5579 | <b>5531.3</b> | 4853 | 5470  | 5819 | 5884  |
| 270  | 287  | 266  | <b>272.7</b>  | 313  | 240   | 444  | 289   |
| 292  | 153  | 625  | <b>426.5</b>  | 432  | 443   | 532  | 932   |
| 302  | 357  | 369  | <b>351.9</b>  | 211  | 330   | 312  | 0     |
| 958  | 1132 | 1225 | <b>1150.4</b> | 937  | 603   | 1171 | 2172  |
| 0    | 0    | 38   | <b>7.6</b>    | 20   | 0     | 61   | 84    |
| 0    | 106  | 309  | <b>131.5</b>  | 266  | 155   | 79   | 14    |
| 26   | 116  | 113  | <b>101.7</b>  | 0    | 118   | 226  | 181   |
| 1433 | 1605 | 2867 | <b>2408.8</b> | 2403 | 2529  | 3874 | 172   |
| 979  | 1565 | 1094 | <b>901.1</b>  | 1077 | 1146  | 411  | 574   |
| 0    | 0    | 291  | <b>142.8</b>  | 103  | 0     | 407  | 397   |
| 35   | 26   | 48   | <b>49.2</b>   | 32   | 23    | 80   | 79    |
| 135  | 73   | 190  | <b>151.5</b>  | 107  | 133   | 321  | 229   |
| 253  | 213  | 413  | <b>315.3</b>  | 316  | 183   | 681  | 581   |
| 23   | 85   | 151  | <b>114.7</b>  | 90   | 97    | 244  | 289   |
| 506  | 0    | 477  | <b>226.2</b>  | 0    | 225   | 75   | 103   |
| 89   | 91   | 99   | <b>104.5</b>  | 122  | 113   | 101  | 241   |
| 96   | 0    | 150  | <b>135.9</b>  | 0    | 181   | 169  | 0     |
| 255  | 106  | 187  | <b>184.6</b>  | 132  | 134   | 158  | 152   |
| 24   | 0    | 60   | <b>29.0</b>   | 27   | 51    | 55   | 57    |
| 0    | 0    | 61   | <b>29.7</b>   | 0    | 0     | 173  | 20    |

|       |       |       |                |       |       |       |      |
|-------|-------|-------|----------------|-------|-------|-------|------|
| 93    | 0     | 381   | <b>206.3</b>   | 254   | 176   | 54    | 13   |
| 2388  | 1856  | 9316  | <b>5178.1</b>  | 4617  | 6550  | 4883  | 9985 |
| 15352 | 20040 | 10440 | <b>15095.1</b> | 13723 | 12458 | 14805 | 7353 |
| 0     | 387   | 454   | <b>454.0</b>   | 437   | 593   | 501   | 834  |
| 0     | 0     | 108   | <b>92.1</b>    | 0     | 0     | 46    | 0    |
| 0     | 0     | 622   | <b>263.5</b>   | 0     | 0     | 18    | 195  |
| 287   | 206   | 335   | <b>314.9</b>   | 295   | 298   | 426   | 430  |
| 0     | 1011  | 1104  | <b>867.2</b>   | 0     | 1013  | 1349  | 867  |
| 6695  | 2736  | 3350  | <b>3695.1</b>  | 2460  | 2135  | 874   | 1874 |
| 117   | 178   | 211   | <b>226.7</b>   | 395   | 180   | 212   | 376  |
| 0     | 31    | 43    | <b>35.8</b>    | 41    | 0     | 0     | 34   |
| 552   | 1011  | 777   | <b>771.1</b>   | 1784  | 802   | 622   | 736  |
| 0     | 1971  | 579   | <b>813.1</b>   | 626   | 452   | 210   | 706  |
| 1103  | 1941  | 2235  | <b>1958.9</b>  | 0     | 1335  | 1398  | 2735 |
| 1124  | 0     | 251   | <b>293.7</b>   | 0     | 0     | 150   | 201  |
| 186   | 88    | 48    | <b>64.4</b>    | 0     | 23    | 44    | 0    |
| 686   | 996   | 1276  | <b>1053.6</b>  | 808   | 1224  | 1762  | 1614 |
| 768   | 226   | 119   | <b>226.9</b>   | 99    | 13    | 41    | 76   |
| 127   | 180   | 569   | <b>337.1</b>   | 392   | 0     | 0     | 97   |
| 61    | 240   | 200   | <b>166.7</b>   | 163   | 154   | 181   | 261  |
| 143   | 333   | 390   | <b>295.6</b>   | 240   | 288   | 446   | 328  |
| 1346  | 2310  | 2272  | <b>2120.8</b>  | 1984  | 1781  | 1989  | 3043 |
| 0     | 14    | 140   | <b>108.6</b>   | 192   | 144   | 65    | 397  |
| 47    | 64    | 164   | <b>115.3</b>   | 62    | 125   | 268   | 273  |
| 31    | 0     | 18    | <b>69.3</b>    | 43    | 39    | 24    | 81   |
| 43    | 118   | 234   | <b>118.8</b>   | 89    | 100   | 165   | 133  |
| 989   | 1074  | 758   | <b>921.8</b>   | 742   | 855   | 725   | 897  |
| 0     | 0     | 35    | <b>13.4</b>    | 84    | 61    | 114   | 59   |
| 9     | 490   | 111   | <b>121.9</b>   | 0     | 0     | 0     | 0    |
| 334   | 732   | 796   | <b>372.4</b>   | 0     | 0     | 0     | 649  |
| 78    | 1196  | 772   | <b>840.9</b>   | 1446  | 1535  | 884   | 704  |
| 528   | 1281  | 1185  | <b>1198.3</b>  | 1617  | 1125  | 1366  | 1506 |
| 0     | 164   | 260   | <b>247.2</b>   | 442   | 373   | 560   | 338  |
| 1291  | 0     | 1066  | <b>850.0</b>   | 265   | 0     | 625   | 686  |
| 211   | 296   | 274   | <b>247.2</b>   | 269   | 174   | 206   | 153  |
| 388   | 651   | 874   | <b>532.9</b>   | 0     | 182   | 465   | 1252 |
| 247   | 135   | 260   | <b>194.8</b>   | 0     | 127   | 219   | 342  |
| 2347  | 2987  | 3257  | <b>3094.8</b>  | 2581  | 2754  | 3016  | 4269 |
| 58    | 128   | 126   | <b>140.1</b>   | 194   | 153   | 171   | 361  |
| 21    | 21    | 78    | <b>49.2</b>    | 49    | 51    | 147   | 68   |
| 52    | 101   | 231   | <b>137.7</b>   | 117   | 111   | 605   | 213  |
| 0     | 105   | 41    | <b>42.5</b>    | 0     | 0     | 0     | 0    |
| 60    | 350   | 283   | <b>268.2</b>   | 0     | 0     | 29    | 0    |
| 253   | 1336  | 1146  | <b>850.9</b>   | 364   | 393   | 0     | 1166 |
| 0     | 353   | 168   | <b>104.4</b>   | 0     | 0     | 0     | 112  |
| 245   | 895   | 956   | <b>745.0</b>   | 511   | 537   | 629   | 1224 |
| 149   | 371   | 607   | <b>429.3</b>   | 356   | 350   | 1770  | 725  |
| 0     | 0     | 116   | <b>44.1</b>    | 0     | 22    | 64    | 28   |
| 149   | 187   | 311   | <b>241.2</b>   | 379   | 227   | 347   | 291  |
| 0     | 78    | 47    | <b>38.3</b>    | 0     | 0     | 0     | 0    |
| 1263  | 1046  | 1587  | <b>1327.7</b>  | 1105  | 703   | 537   | 1210 |
| 42    | 50    | 142   | <b>94.7</b>    | 95    | 62    | 324   | 215  |

|       |       |       |                |       |       |       |       |
|-------|-------|-------|----------------|-------|-------|-------|-------|
| 280   | 79    | 153   | <b>165.8</b>   | 52    | 76    | 193   | 333   |
| 7     | 32    | 65    | <b>42.9</b>    | 62    | 42    | 134   | 72    |
| 2944  | 2591  | 3430  | <b>3133.1</b>  | 2510  | 1754  | 1559  | 2807  |
| 170   | 46    | 94    | <b>93.6</b>    | 66    | 43    | 102   | 120   |
| 0     | 33    | 61    | <b>46.6</b>    | 36    | 28    | 0     | 126   |
| 159   | 42    | 16    | <b>55.2</b>    | 0     | 14    | 21    | 0     |
| 0     | 40    | 58    | <b>19.6</b>    | 0     | 27    | 20    | 0     |
| 7377  | 9281  | 11111 | <b>6768.2</b>  | 6230  | 3725  | 1599  | 366   |
| 1839  | 1515  | 3754  | <b>1878.1</b>  | 1496  | 1960  | 2064  | 3538  |
| 817   | 707   | 2410  | <b>935.9</b>   | 835   | 885   | 1712  | 1165  |
| 69    | 0     | 168   | <b>47.4</b>    | 52    | 0     | 13    | 0     |
| 20064 | 27077 | 21987 | <b>19533.1</b> | 15486 | 15643 | 10972 | 6689  |
| 100   | 79    | 197   | <b>89.4</b>    | 108   | 130   | 332   | 290   |
| -3    | -3    | -3    | <b>22094.6</b> | 57414 | 60875 | 58487 | 23114 |
| 694   | 928   | 275   | <b>662.8</b>   | 752   | 0     | 0     | 50    |
| 596   | 430   | 585   | <b>437.3</b>   | 428   | 617   | 626   | 1197  |
| 85    | 78    | 118   | <b>68.0</b>    | 45    | 100   | 113   | 288   |
| 0     | 9     | 111   | <b>31.8</b>    | 23    | 44    | 81    | 45    |
| 0     | 0     | 102   | <b>35.1</b>    | 0     | 22    | 0     | 240   |
| 123   | 90    | 106   | <b>109.2</b>   | 92    | 0     | 84    | 325   |
| 412   | 398   | 824   | <b>685.7</b>   | 676   | 732   | 894   | 1152  |
| 161   | 180   | 198   | <b>182.9</b>   | 184   | 0     | 182   | 283   |
| 47    | 0     | 65    | <b>28.8</b>    | 13    | 3     | 376   | 148   |
| 1303  | 1315  | 173   | <b>1260.0</b>  | 1585  | 4433  | 1548  | 1259  |
| 517   | 464   | 435   | <b>478.2</b>   | 582   | 660   | 418   | 518   |
| 590   | 707   | 718   | <b>673.7</b>   | 1008  | 942   | 337   | 0     |
| 31    | 56    | 114   | <b>110.4</b>   | 101   | 0     | 168   | 276   |
| 1453  | 5311  | 4254  | <b>4565.5</b>  | 7673  | 2022  | 4286  | 3026  |
| 0     | 31    | 150   | <b>91.9</b>    | 96    | 38    | 419   | 325   |
| 2641  | 2454  | 1362  | <b>2401.2</b>  | 2161  | 3401  | 3679  | 3920  |
| 38766 | 46277 | 27452 | <b>31978.1</b> | -3    | 63357 | -3    | 43218 |
| 220   | 113   | 11    | <b>88.6</b>    | 0     | 20    | 44    | 199   |
| 83    | 77    | 44    | <b>65.4</b>    | 53    | 0     | 23    | 196   |
| 55    | 122   | 34    | <b>77.6</b>    | 69    | 17    | 34    | 213   |
| 48    | 53    | 39    | <b>57.2</b>    | 70    | 40    | 0     | 271   |
| 0     | 0     | 12    | <b>9.5</b>     | 0     | 0     | 0     | 60    |
| 0     | 986   | 1898  | <b>969.2</b>   | 0     | 0     | 0     | 1913  |
| 319   | 0     | 216   | <b>205.2</b>   | 0     | 0     | 0     | 92    |
| 512   | 337   | 534   | <b>400.8</b>   | 611   | 55    | 381   | 324   |
| 41    | 0     | 66    | <b>21.4</b>    | 0     | 0     | 0     | 62    |
| 428   | 1917  | 1694  | <b>1284.0</b>  | 965   | 0     | 0     | 644   |
| 5170  | 4630  | 4601  | <b>4795.3</b>  | 4272  | 4371  | 2010  | 5582  |
| 697   | 279   | 368   | <b>690.3</b>   | 981   | 1071  | 664   | 2532  |
| 0     | 0     | 272   | <b>54.3</b>    | 0     | 689   | 1464  | 0     |
| 796   | 706   | 1050  | <b>974.2</b>   | 841   | 0     | 381   | 1718  |
| 1609  | 947   | 935   | <b>1933.0</b>  | 1856  | 2135  | 1249  | 3309  |
| 1167  | 1010  | 831   | <b>917.2</b>   | 948   | 265   | 523   | 1672  |
| 666   | 435   | 325   | <b>587.9</b>   | 411   | 0     | 0     | 922   |
| 77    | 161   | 168   | <b>256.6</b>   | 11    | 0     | 0     | 412   |
| 213   | 222   | 546   | <b>486.8</b>   | 556   | 245   | 111   | 540   |
| 337   | 288   | 419   | <b>342.2</b>   | 0     | 0     | 372   | 206   |
| 116   | 172   | 168   | <b>115.4</b>   | 94    | 0     | 0     | 0     |

|       |       |       |                |       |       |       |       |
|-------|-------|-------|----------------|-------|-------|-------|-------|
| 170   | 101   | 215   | <b>237.7</b>   | 193   | 217   | 0     | 326   |
| 683   | 543   | 720   | <b>661.7</b>   | 575   | 0     | 78    | 1138  |
| 187   | 490   | 463   | <b>468.4</b>   | 583   | 979   | 1333  | 941   |
| 242   | 169   | 195   | <b>299.4</b>   | 80    | 185   | 0     | 104   |
| 55    | 72    | 56    | <b>49.4</b>    | 0     | 76    | 0     | 245   |
| 577   | 445   | 704   | <b>800.6</b>   | 616   | 0     | 0     | 1491  |
| 1684  | 3009  | 2422  | <b>3717.8</b>  | 2974  | 0     | 3190  | 6250  |
| 2068  | 4060  | 1723  | <b>3202.2</b>  | 2050  | 0     | 3121  | 6267  |
| 334   | 0     | 253   | <b>343.7</b>   | 0     | 0     | 0     | 602   |
| 1340  | 1240  | 862   | <b>1198.8</b>  | 835   | 3369  | 2671  | 2025  |
| 1626  | 1371  | 799   | <b>759.2</b>   | 2354  | 4482  | 0     | 1258  |
| 268   | 388   | 677   | <b>470.4</b>   | 340   | 0     | 333   | 366   |
| 83    | 2175  | 2611  | <b>2044.5</b>  | 2700  | 2100  | 1941  | 2371  |
| 106   | 73    | 124   | <b>112.2</b>   | 99    | 29    | 264   | 262   |
| 0     | 0     | 40    | <b>29.2</b>    | 48    | 0     | 38    | 129   |
| 455   | 304   | 669   | <b>541.4</b>   | 512   | 446   | 837   | 777   |
| 41    | 94    | 155   | <b>124.2</b>   | 185   | 0     | 145   | 243   |
| 0     | 458   | 125   | <b>202.4</b>   | 64    | 0     | 111   | 91    |
| 7064  | 8267  | 7690  | <b>8419.7</b>  | 7960  | 8683  | 9923  | 10341 |
| 312   | 0     | 310   | <b>198.3</b>   | 93    | 38    | 186   | 226   |
| 7839  | 11895 | 5804  | <b>9854.5</b>  | 9932  | 0     | 0     | 17945 |
| 1025  | 1019  | 475   | <b>847.3</b>   | 0     | 0     | 0     | 677   |
| 4402  | 4180  | 2579  | <b>4208.9</b>  | 3253  | 4105  | 0     | 0     |
| 128   | 242   | 51    | <b>148.2</b>   | 88    | 0     | 38    | 357   |
| 416   | 362   | 354   | <b>226.5</b>   | 0     | 0     | 0     | 603   |
| 909   | 858   | 1028  | <b>1033.5</b>  | 1090  | 1213  | 1179  | 1343  |
| 6805  | 6955  | 6608  | <b>7318.9</b>  | 7846  | 4323  | 3710  | 5811  |
| 1917  | 2101  | 2620  | <b>2508.8</b>  | 2362  | 1989  | 2707  | 2709  |
| 768   | 440   | 390   | <b>483.1</b>   | 0     | 0     | 87    | 0     |
| 16267 | 20403 | 22248 | <b>21481.7</b> | 18736 | 22275 | 18369 | 24469 |
| 1073  | 1201  | 758   | <b>1163.2</b>  | 946   | 935   | 704   | 709   |
| 0     | 0     | 129   | <b>25.8</b>    | 0     | 0     | 0     | 0     |
| 1552  | 2228  | 1387  | <b>2111.4</b>  | 1435  | 849   | 745   | 3122  |
| 2796  | 3000  | 1452  | <b>2638.1</b>  | 1921  | 0     | 0     | 2544  |
| 0     | 0     | 84    | <b>63.4</b>    | 0     | 644   | 2340  | 408   |
| 5893  | 4796  | 1763  | <b>4501.2</b>  | 4016  | 0     | 0     | 4560  |
| 0     | 5732  | 4525  | <b>3034.7</b>  | 0     | 1469  | 0     | 0     |
| 0     | 2436  | 1276  | <b>1384.4</b>  | 0     | 2810  | 4114  | 1383  |
| 1858  | 926   | 996   | <b>1372.5</b>  | 1831  | 0     | 0     | 2093  |
| 0     | 999   | 416   | <b>549.8</b>   | 838   | 1198  | 0     | 1126  |
| 11115 | 5887  | 3337  | <b>8606.0</b>  | 3877  | 11162 | 0     | 24466 |
| 1451  | 2274  | 259   | <b>1941.3</b>  | 5503  | 0     | 0     | 0     |
| 1524  | 518   | 319   | <b>1052.5</b>  | 857   | 0     | 0     | 743   |
| 2900  | 0     | 1528  | <b>3085.9</b>  | 5570  | 2019  | 1752  | 5088  |
| 356   | 502   | 478   | <b>486.3</b>   | 695   | 415   | 375   | 484   |
| 0     | 0     | 716   | <b>143.2</b>   | 0     | 1170  | 359   | 2064  |
| 1347  | 2209  | 955   | <b>2014.6</b>  | 2126  | 0     | 0     | 1219  |
| 1261  | 1731  | 1641  | <b>1662.4</b>  | 1700  | 1937  | 1964  | 797   |
| 0     | 3265  | 1342  | <b>1566.0</b>  | 1742  | 0     | 247   | 637   |
| 1198  | 1107  | 757   | <b>1070.5</b>  | 909   | 0     | 0     | 1158  |
| 7825  | 12905 | 5018  | <b>9138.9</b>  | 7638  | 3808  | 1847  | 14545 |
| 0     | 0     | 1406  | <b>950.9</b>   | 0     | 0     | 0     | 0     |

|       |       |       |                |       |       |       |       |
|-------|-------|-------|----------------|-------|-------|-------|-------|
| 478   | 464   | 93    | <b>327.1</b>   | 336   | 0     | 0     | 341   |
| 449   | 844   | 683   | <b>712.8</b>   | 0     | 0     | 0     | 1336  |
| 1690  | 2295  | 2658  | <b>2225.6</b>  | 1765  | 1734  | 1912  | 2361  |
| 236   | 352   | 389   | <b>331.7</b>   | 293   | 178   | 262   | 627   |
| 1695  | 2269  | 2307  | <b>2730.3</b>  | 2664  | 2978  | 2329  | 3222  |
| 374   | 301   | 113   | <b>200.8</b>   | 168   | 121   | 257   | 430   |
| 210   | 68    | 71    | <b>101.8</b>   | 58    | 45    | 240   | 159   |
| 8058  | 8146  | 10602 | <b>9670.4</b>  | 8204  | 5193  | 5439  | 13081 |
| 11    | 0     | 35    | <b>27.2</b>    | 30    | 16    | 14    | 89    |
| 4453  | 4611  | 5394  | <b>5448.1</b>  | 5100  | 3220  | 2437  | 5319  |
| 439   | 0     | 43    | <b>96.3</b>    | 0     | 0     | 0     | 0     |
| 68    | 29    | 19    | <b>33.0</b>    | 0     | 0     | 17    | 0     |
| 236   | 0     | 26    | <b>52.5</b>    | 0     | 0     | 0     | 0     |
| 23508 | 21148 | 10767 | <b>16293.5</b> | 15685 | 10655 | 16360 | 9264  |
| 2295  | 11933 | 5868  | <b>6055.8</b>  | 5587  | 10094 | 9231  | 3306  |
| 0     | 52    | 172   | <b>65.1</b>    | 0     | 131   | 43    | 0     |
| 690   | 0     | 731   | <b>284.1</b>   | 0     | 1045  | 0     | 436   |
| 385   | 360   | 407   | <b>399.3</b>   | 1635  | 1719  | 1603  | 1136  |
| 10    | 87    | 120   | <b>80.6</b>    | 177   | 635   | 633   | 103   |
| 1594  | 1859  | 119   | <b>1124.5</b>  | 0     | 0     | 0     | 2121  |
| 0     | 0     | 34    | <b>13.8</b>    | 0     | 0     | 0     | 89    |
| 0     | 0     | 23    | <b>22.0</b>    | 0     | 0     | 17    | 74    |
| 75    | 104   | 57    | <b>71.2</b>    | 163   | 465   | 389   | 81    |
| 336   | 214   | 206   | <b>247.8</b>   | 141   | 132   | 0     | 862   |
| 0     | 0     | 163   | <b>32.5</b>    | 0     | 0     | 0     | 172   |
| 2412  | 143   | 145   | <b>539.9</b>   | 0     | 0     | 0     | 86    |
| 104   | 143   | 42    | <b>79.7</b>    | 15    | 0     | 0     | 312   |
| 20    | 66    | 56    | <b>38.7</b>    | 42    | 10    | 13    | 0     |
| 78    | 67    | 73    | <b>81.0</b>    | 38    | 87    | 398   | 178   |
| 17    | 47    | 1     | <b>23.0</b>    | 0     | 0     | 0     | 11    |
| 605   | 633   | 348   | <b>608.2</b>   | 519   | 0     | 0     | 1066  |
| 162   | 215   | 186   | <b>198.2</b>   | 154   | 304   | 150   | 618   |
| 77    | 283   | 84    | <b>141.4</b>   | 339   | 0     | 204   | 506   |
| 45    | 262   | 231   | <b>263.8</b>   | 228   | 985   | 451   | 614   |
| 383   | 429   | 614   | <b>506.7</b>   | 655   | 1338  | 1288  | 911   |
| 1983  | 0     | 1051  | <b>893.6</b>   | 1800  | 3829  | 0     | 0     |
| 1845  | 2965  | 1368  | <b>2438.3</b>  | 2392  | 0     | 0     | 3041  |
| 0     | 39    | 149   | <b>48.2</b>    | 0     | 0     | 0     | 308   |
| 105   | 405   | 168   | <b>325.8</b>   | 300   | 0     | 305   | 894   |
| 429   | 1070  | 703   | <b>1129.0</b>  | 849   | 526   | 0     | 1881  |
| 3457  | 3591  | 2486  | <b>3346.2</b>  | 2662  | 4555  | 1336  | 4892  |
| 1206  | 1118  | 703   | <b>605.4</b>   | 744   | 0     | 0     | 0     |
| 83    | 102   | 92    | <b>77.1</b>    | 0     | 0     | 65    | 207   |
| 0     | 0     | 56    | <b>11.2</b>    | 0     | 802   | 0     | 0     |
| 5522  | 5938  | 1875  | <b>3822.7</b>  | 6616  | 0     | 0     | 293   |
| 0     | 3653  | 2769  | <b>1928.2</b>  | 0     | 2280  | 1216  | 1655  |
| 0     | 0     | 551   | <b>110.2</b>   | 0     | 3477  | 2135  | 0     |
| 0     | 0     | 2048  | <b>409.6</b>   | 0     | 0     | 0     | 0     |
| 0     | 0     | 1976  | <b>395.1</b>   | 6363  | 2083  | 7160  | 0     |
| 4733  | 0     | 456   | <b>1037.8</b>  | 0     | 0     | 0     | 1974  |
| 62    | 173   | 100   | <b>140.9</b>   | 253   | 0     | 0     | 380   |
| 0     | 0     | 176   | <b>35.2</b>    | 1378  | 562   | 183   | 0     |

|          |          |          |               |          |          |          |          |
|----------|----------|----------|---------------|----------|----------|----------|----------|
| 0        | 0        | 330      | <b>137.9</b>  | 0        | 0        | 0        | 0        |
| 0        | 0        | 6198     | <b>1239.6</b> | 0        | 0        | 0        | 0        |
| 0        | 0        | 521      | <b>104.3</b>  | 0        | 0        | 0        | 0        |
| 0        | 0        | 632      | <b>126.5</b>  | 0        | 0        | 0        | 0        |
| 0        | 0        | 386      | <b>77.1</b>   | 0        | 0        | 0        | 0        |
| 0        | 0        | 158      | <b>31.7</b>   | 0        | 0        | 0        | 0        |
| 0        | 0        | 3553     | <b>710.5</b>  | 0        | 0        | 0        | 0        |
| 0        | 0        | 214      | <b>42.9</b>   | 0        | 0        | 0        | 0        |
| 0        | 0        | 845      | <b>169.0</b>  | 0        | 0        | 0        | 0        |
| 0        | 0        | 200      | <b>40.0</b>   | 0        | 0        | 0        | 0        |
| 0        | 0        | 345      | <b>68.9</b>   | 0        | 0        | 0        | 0        |
| 0        | 0        | 271      | <b>54.2</b>   | 0        | 0        | 0        | 0        |
| 0        | 0        | 2151     | <b>430.3</b>  | 0        | 0        | 0        | 0        |
| 0        | 0        | 2325     | <b>465.1</b>  | 0        | 0        | 0        | 0        |
| 0        | 0        | 2842     | <b>568.5</b>  | 0        | 0        | 0        | 0        |
| 0        | 0        | 1547     | <b>309.5</b>  | 0        | 0        | 0        | 0        |
| 0        | 0        | 2302     | <b>460.5</b>  | 0        | 0        | 0        | 0        |
| 0        | 0        | 3351     | <b>670.2</b>  | 0        | 0        | 0        | 0        |
| 0        | 0        | 203      | <b>40.5</b>   | 0        | 0        | 0        | 0        |
| 0        | 0        | 93       | <b>18.6</b>   | 0        | 0        | 0        | 0        |
| 0        | 0        | 54       | <b>10.8</b>   | 0        | 0        | 0        | 0        |
| quantity | quantity | quantity |               | quantity | quantity | quantity | quantity |

| 20040531O | 24mon          | 20040531P | 20040531Q | 20040531R | 20040628Srs | 34mon          |
|-----------|----------------|-----------|-----------|-----------|-------------|----------------|
| 319       | <b>1472.1</b>  | 181       | 1206      | 1757      | 3904        | <b>1762.0</b>  |
| 476       | <b>402.7</b>   | 304       | 91        | 86        | 335         | <b>204.0</b>   |
| 252       | <b>155.6</b>   | 79        | 193       | 176       | 184         | <b>158.1</b>   |
| 278       | <b>286.3</b>   | 209       | 75        | 66        | 495         | <b>211.3</b>   |
| 594       | <b>799.5</b>   | 561       | 535       | 395       | 1138        | <b>657.1</b>   |
| 331       | <b>240.8</b>   | 414       | 288       | 269       | 537         | <b>377.0</b>   |
| 93        | <b>123.0</b>   | 248       | 46        | 49        | 164         | <b>126.5</b>   |
| 29        | <b>38.3</b>    | 0         | 0         | 0         | 0           | <b>0.0</b>     |
| 544       | <b>515.5</b>   | 760       | 375       | 459       | 813         | <b>601.8</b>   |
| 0         | <b>48.9</b>    | 1642      | 0         | 32        | 0           | <b>418.7</b>   |
| 32        | <b>12.8</b>    | 22        | 0         | 5         | 0           | <b>6.9</b>     |
| 0         | <b>0.0</b>     | 0         | 0         | 0         | 0           | <b>0.0</b>     |
| 0         | <b>1926.0</b>  | 0         | 0         | 1672      | 0           | <b>417.9</b>   |
| 0         | <b>106.7</b>   | 0         | 40        | 64        | 13          | <b>29.1</b>    |
| 2508      | <b>2034.8</b>  | 2216      | 2950      | 1794      | 1948        | <b>2227.0</b>  |
| 17480     | <b>19513.7</b> | 22915     | 19250     | 19176     | 23380       | <b>21180.1</b> |
| 35        | <b>120.9</b>   | 35        | 0         | 19        | 14          | <b>17.0</b>    |
| 329       | <b>179.1</b>   | 123       | 244       | 181       | 81          | <b>157.3</b>   |
| 6         | <b>27.3</b>    | 47        | 16        | 20        | 0           | <b>21.0</b>    |
| 136       | <b>191.0</b>   | 210       | 69        | 53        | 127         | <b>114.8</b>   |
| 296       | <b>389.7</b>   | 857       | 616       | 433       | 974         | <b>720.1</b>   |
| 21        | <b>15.5</b>    | 0         | 23        | 20        | 25          | <b>16.9</b>    |
| 84        | <b>40.8</b>    | 47        | 9         | 54        | 3           | <b>28.1</b>    |
| 13        | <b>16.9</b>    | 3         | 115       | 7         | 2           | <b>31.7</b>    |
| 0         | <b>8.3</b>     | 87        | 0         | 27        | 65          | <b>44.6</b>    |
| 493       | <b>409.8</b>   | 434       | 355       | 93        | 0           | <b>220.5</b>   |
| 77        | <b>28.6</b>    | 52        | 16        | 26        | 10          | <b>25.9</b>    |
| 184       | <b>69.6</b>    | 127       | 41        | 75        | 11          | <b>63.4</b>    |
| 73        | <b>118.0</b>   | 82        | 146       | 67        | 62          | <b>89.3</b>    |
| 1973      | <b>2047.2</b>  | 2286      | 2323      | 1692      | 2422        | <b>2180.9</b>  |
| 223       | <b>161.2</b>   | 276       | 112       | 215       | 19          | <b>155.5</b>   |
| 182       | <b>252.0</b>   | 177       | 144       | 44        | 82          | <b>111.7</b>   |
| 63        | <b>355.6</b>   | 71        | 31        | 143       | 649         | <b>223.2</b>   |
| 21        | <b>63.3</b>    | 63        | 107       | 25        | 128         | <b>80.8</b>    |
| 14        | <b>18.7</b>    | 120       | 45        | 10        | 0           | <b>43.8</b>    |
| 0         | <b>58.0</b>    | 0         | 0         | 0         | 0           | <b>0.0</b>     |
| 721       | <b>546.1</b>   | 0         | 166       | 356       | 20          | <b>135.5</b>   |
| 402       | <b>311.0</b>   | 372       | 335       | 262       | 0           | <b>242.3</b>   |
| 18555     | <b>23837.4</b> | 20990     | 18366     | 14978     | 8957        | <b>15822.6</b> |
| 417       | <b>210.9</b>   | 1403      | 319       | 157       | 0           | <b>470.0</b>   |
| 308       | <b>230.3</b>   | 422       | 525       | 316       | 0           | <b>315.7</b>   |
| 0         | <b>13.3</b>    | 0         | 0         | 42        | 8           | <b>12.7</b>    |
| 44        | <b>58.0</b>    | 0         | 12        | 19        | 0           | <b>7.6</b>     |
| 611       | <b>279.0</b>   | 230       | 0         | 765       | 119         | <b>278.5</b>   |
| 55        | <b>31.4</b>    | 87        | 0         | 46        | 0           | <b>33.0</b>    |
| 35        | <b>28.0</b>    | 46        | 0         | 26        | 0           | <b>17.8</b>    |
| 61        | <b>61.2</b>    | 0         | 147       | 112       | 69          | <b>81.9</b>    |
| 7585      | <b>2416.4</b>  | 0         | 0         | 9350      | 10074       | <b>4856.2</b>  |
| 15        | <b>23.6</b>    | 0         | 7         | 2         | 0           | <b>2.1</b>     |
| 45        | <b>32.3</b>    | 31        | 12        | 0         | 64          | <b>26.6</b>    |
| 528       | <b>292.0</b>   | 375       | 1235      | 0         | 175         | <b>446.3</b>   |

|       |                |       |       |       |       |                |
|-------|----------------|-------|-------|-------|-------|----------------|
| 105   | <b>76.2</b>    | 115   | 65    | 222   | 0     | <b>100.6</b>   |
| 51    | <b>122.5</b>   | 213   | 0     | 129   | 84    | <b>106.5</b>   |
| 141   | <b>242.9</b>   | 152   | 181   | 98    | 231   | <b>165.6</b>   |
| 232   | <b>292.9</b>   | 401   | 326   | 0     | 345   | <b>268.2</b>   |
| 49    | <b>240.6</b>   | 100   | 65    | 130   | 222   | <b>129.1</b>   |
| 49    | <b>233.7</b>   | 185   | 209   | 0     | 246   | <b>160.1</b>   |
| 114   | <b>143.1</b>   | 40    | 101   | 0     | 0     | <b>35.1</b>    |
| 333   | <b>691.7</b>   | 110   | 186   | 0     | 225   | <b>130.3</b>   |
| 418   | <b>771.5</b>   | 1250  | 2412  | 0     | 0     | <b>915.4</b>   |
| 31    | <b>25.3</b>    | 5     | 55    | 16    | 72    | <b>36.8</b>    |
| 0     | <b>20.1</b>    | 118   | 65    | 0     | 0     | <b>45.8</b>    |
| 24    | <b>30.1</b>    | 101   | 50    | 0     | 0     | <b>37.8</b>    |
| 74    | <b>21.1</b>    | 56    | 20    | 88    | 0     | <b>40.9</b>    |
| 4219  | <b>3866.9</b>  | 4246  | 4101  | 4176  | 3523  | <b>4011.6</b>  |
| 0     | <b>206.7</b>   | 0     | 0     | 64    | 200   | <b>66.0</b>    |
| 401   | <b>466.2</b>   | 368   | 154   | 318   | 465   | <b>326.4</b>   |
| 543   | <b>1076.7</b>  | 701   | 634   | 913   | 1212  | <b>865.1</b>   |
| 888   | <b>823.2</b>   | 368   | 79    | 250   | 335   | <b>258.0</b>   |
| 127   | <b>71.8</b>    | 64    | 0     | 0     | 96    | <b>40.0</b>    |
| 128   | <b>25.7</b>    | 0     | 0     | 0     | 0     | <b>0.0</b>     |
| 95    | <b>46.6</b>    | 32    | 136   | 77    | 49    | <b>73.6</b>    |
| 0     | <b>0.0</b>     | 26    | 0     | 0     | 0     | <b>6.6</b>     |
| 0     | <b>0.0</b>     | 56    | 0     | 0     | 0     | <b>14.1</b>    |
| 442   | <b>284.5</b>   | 282   | 2     | 67    | 468   | <b>204.6</b>   |
| 76    | <b>152.9</b>   | 396   | 443   | 511   | 393   | <b>435.8</b>   |
| 1526  | <b>1049.8</b>  | 1168  | 1203  | 1232  | 986   | <b>1147.1</b>  |
| 0     | <b>1.6</b>     | 0     | 0     | 0     | 0     | <b>0.0</b>     |
| 355   | <b>152.7</b>   | 48    | 303   | 92    | 33    | <b>119.1</b>   |
| 197   | <b>136.0</b>   | 114   | 0     | 62    | 155   | <b>82.6</b>    |
| 10    | <b>37.3</b>    | 8     | 2     | 4     | 0     | <b>3.6</b>     |
| 91    | <b>39.0</b>    | 34    | 34    | 26    | 0     | <b>23.4</b>    |
| 10    | <b>2.8</b>     | 0     | 0     | 0     | 0     | <b>0.0</b>     |
| 0     | <b>0.0</b>     | 0     | 0     | 0     | 9     | <b>2.2</b>     |
| 68    | <b>50.4</b>    | 51    | 15    | 47    | 25    | <b>34.3</b>    |
| 0     | <b>0.0</b>     | 0     | 0     | 0     | 2     | <b>0.5</b>     |
| 23    | <b>14.3</b>    | 4     | 5     | 3     | 5     | <b>9.0</b>     |
| 351   | <b>315.3</b>   | 321   | 128   | 210   | 323   | <b>245.3</b>   |
| 2812  | <b>3691.9</b>  | 2518  | 4050  | 1810  | 3436  | <b>2953.3</b>  |
| 82    | <b>44.2</b>    | 137   | 97    | 118   | 0     | <b>88.1</b>    |
| 31060 | <b>34921.7</b> | 33686 | 37250 | 35242 | 40535 | <b>36678.1</b> |
| 0     | <b>647.3</b>   | 1657  | 0     | 2298  | 0     | <b>988.8</b>   |
| 533   | <b>468.2</b>   | 785   | 794   | 745   | 325   | <b>662.3</b>   |
| 526   | <b>499.3</b>   | 800   | 681   | 936   | 559   | <b>744.2</b>   |
| 418   | <b>352.7</b>   | 467   | 668   | 424   | 481   | <b>509.8</b>   |
| 37    | <b>19.7</b>    | 151   | 762   | 0     | 0     | <b>228.2</b>   |
| 0     | <b>3.9</b>     | 80    | 106   | 11    | 0     | <b>49.4</b>    |
| 0     | <b>387.2</b>   | 0     | 0     | 108   | 0     | <b>27.0</b>    |
| 0     | <b>0.0</b>     | 23    | 43    | 51    | 0     | <b>29.1</b>    |
| 536   | <b>799.6</b>   | 108   | 147   | 15    | 570   | <b>210.3</b>   |
| 0     | <b>0.0</b>     | 31    | 0     | 44    | 0     | <b>18.7</b>    |
| 442   | <b>430.3</b>   | 338   | 487   | 36    | 0     | <b>215.5</b>   |
| 367   | <b>328.4</b>   | 327   | 578   | 279   | 449   | <b>408.2</b>   |



|      |               |      |      |      |      |               |
|------|---------------|------|------|------|------|---------------|
| 64   | <b>78.4</b>   | 237  | 239  | 114  | 0    | <b>147.4</b>  |
| 15   | <b>36.5</b>   | 74   | 98   | 0    | 0    | <b>43.0</b>   |
| 134  | <b>60.5</b>   | 96   | 33   | 66   | 0    | <b>48.7</b>   |
| 0    | <b>0.0</b>    | 0    | 0    | 0    | 0    | <b>0.0</b>    |
| 79   | <b>70.9</b>   | 95   | 45   | 16   | 14   | <b>42.3</b>   |
| 355  | <b>267.8</b>  | 474  | 476  | 206  | 0    | <b>288.9</b>  |
| 73   | <b>105.3</b>  | 0    | 120  | 105  | 0    | <b>56.4</b>   |
| 144  | <b>180.1</b>  | 233  | 141  | 194  | 111  | <b>169.7</b>  |
| 44   | <b>43.0</b>   | 116  | 0    | 0    | 0    | <b>28.9</b>   |
| 9    | <b>12.2</b>   | 71   | 18   | 43   | 0    | <b>33.1</b>   |
| 176  | <b>52.7</b>   | 73   | 0    | 184  | 0    | <b>64.0</b>   |
| 47   | <b>38.4</b>   | 79   | 93   | 0    | 0    | <b>43.0</b>   |
| 0    | <b>10.4</b>   | 54   | 0    | 70   | 0    | <b>31.0</b>   |
| 324  | <b>342.6</b>  | 243  | 273  | 0    | 76   | <b>148.0</b>  |
| 17   | <b>197.6</b>  | 189  | 650  | 302  | 54   | <b>298.8</b>  |
| 1854 | <b>1904.1</b> | 1369 | 870  | 206  | 1871 | <b>1079.1</b> |
| 133  | <b>26.6</b>   | 0    | 40   | 40   | 0    | <b>19.9</b>   |
| 0    | <b>20.7</b>   | 173  | 0    | 0    | 9    | <b>45.6</b>   |
| 23   | <b>38.8</b>   | 64   | 0    | 42   | 27   | <b>33.1</b>   |
| 14   | <b>236.3</b>  | 104  | 0    | 0    | 41   | <b>36.2</b>   |
| 111  | <b>167.5</b>  | 230  | 125  | 209  | 84   | <b>161.8</b>  |
| 22   | <b>36.5</b>   | 33   | 36   | 159  | 19   | <b>61.7</b>   |
| 205  | <b>820.3</b>  | 865  | 1363 | 986  | 179  | <b>848.0</b>  |
| 0    | <b>25.3</b>   | 0    | 0    | 0    | 0    | <b>0.0</b>    |
| 1720 | <b>2320.6</b> | 5693 | 4266 | 1976 | 1175 | <b>3277.5</b> |
| 0    | <b>101.1</b>  | 0    | 0    | 0    | 401  | <b>100.1</b>  |
| 0    | <b>25.4</b>   | 0    | 73   | 0    | 0    | <b>18.3</b>   |
| 2547 | <b>4354.7</b> | 9927 | 2544 | 7180 | 7971 | <b>6905.5</b> |
| 323  | <b>276.1</b>  | 1229 | 0    | 0    | 272  | <b>375.4</b>  |
| 0    | <b>126.6</b>  | 0    | 1110 | 4156 | 0    | <b>1316.6</b> |
| 3622 | <b>4608.8</b> | 7445 | 7764 | 6516 | 4240 | <b>6491.4</b> |
| 0    | <b>78.4</b>   | 112  | 56   | 44   | 0    | <b>52.9</b>   |
| 0    | <b>54.3</b>   | 321  | 0    | 0    | 0    | <b>80.1</b>   |
| 173  | <b>34.5</b>   | 0    | 0    | 13   | 40   | <b>13.1</b>   |
| 1392 | <b>278.3</b>  | 1311 | 3545 | 0    | 0    | <b>1214.0</b> |
| 27   | <b>62.9</b>   | 65   | 86   | 0    | 15   | <b>41.5</b>   |
| 348  | <b>310.3</b>  | 1324 | 0    | 2811 | 0    | <b>1033.6</b> |
| 0    | <b>27.9</b>   | 84   | 0    | 17   | 0    | <b>25.3</b>   |
| 0    | <b>29.2</b>   | 0    | 0    | 0    | 53   | <b>13.2</b>   |
| 1025 | <b>1016.2</b> | 1267 | 1258 | 3569 | 96   | <b>1547.6</b> |
| 72   | <b>109.8</b>  | 45   | 47   | 0    | 21   | <b>28.2</b>   |
| 236  | <b>74.9</b>   | 406  | 285  | 0    | 90   | <b>195.2</b>  |
| 431  | <b>609.3</b>  | 790  | 520  | 847  | 263  | <b>605.1</b>  |
| 978  | <b>513.8</b>  | 1717 | 1858 | 2093 | 961  | <b>1657.4</b> |
| 104  | <b>465.4</b>  | 925  | 766  | 658  | 338  | <b>671.8</b>  |
| 0    | <b>50.5</b>   | 0    | 0    | 0    | 78   | <b>19.4</b>   |
| 0    | <b>8.0</b>    | 0    | 0    | 0    | 0    | <b>0.0</b>    |
| 24   | <b>13.6</b>   | 79   | 4    | 21   | 0    | <b>26.1</b>   |
| 71   | <b>55.5</b>   | 73   | 0    | 67   | 0    | <b>35.0</b>   |
| 0    | <b>0.0</b>    | 0    | 0    | 0    | 0    | <b>0.0</b>    |
| 178  | <b>93.2</b>   | 188  | 63   | 136  | 50   | <b>108.9</b>  |
| 139  | <b>92.0</b>   | 113  | 105  | 64   | 36   | <b>79.4</b>   |

|      |        |      |      |      |      |        |
|------|--------|------|------|------|------|--------|
| 50   | 19.1   | 85   | 0    | 46   | 0    | 32.8   |
| 56   | 26.4   | 34   | 0    | 0    | 28   | 15.7   |
| 0    | 164.7  | 277  | 249  | 429  | 27   | 245.3  |
| 0    | 0.0    | 52   | 0    | 0    | 0    | 13.0   |
| 6    | 6.4    | 25   | 9    | 20   | 0    | 13.6   |
| 26   | 57.1   | 0    | 61   | 0    | 54   | 28.7   |
| 0    | 5.7    | 0    | 0    | 0    | 0    | 0.0    |
| 8    | 18.1   | 0    | 15   | 0    | 0    | 3.7    |
| 13   | 36.6   | 0    | 18   | 0    | 44   | 15.5   |
| 0    | 0.0    | 0    | 0    | 6    | 0    | 1.4    |
| 65   | 56.1   | 113  | 70   | 45   | 39   | 66.7   |
| 43   | 27.6   | 121  | 55   | 50   | 119  | 86.3   |
| 27   | 21.3   | 98   | 48   | 15   | 13   | 43.4   |
| 187  | 240.7  | 278  | 165  | 215  | 445  | 275.5  |
| 35   | 24.9   | 115  | 38   | 69   | 5    | 56.9   |
| 34   | 43.3   | 76   | 40   | 40   | 26   | 45.6   |
| 32   | 46.4   | 127  | 8    | 13   | 10   | 39.6   |
| 0    | 660.9  | 510  | 236  | 491  | 1342 | 644.8  |
| 76   | 130.6  | 297  | 195  | 243  | 344  | 269.9  |
| 85   | 81.6   | 271  | 207  | 198  | 0    | 168.9  |
| 0    | 3.9    | 0    | 0    | 0    | 0    | 0.0    |
| 0    | 35.8   | 0    | 0    | 0    | 0    | 0.0    |
| 115  | 129.0  | 154  | 160  | 77   | 19   | 102.4  |
| 507  | 465.6  | 1055 | 902  | 412  | 113  | 620.6  |
| 49   | 28.5   | 154  | 49   | 45   | 0    | 61.9   |
| 239  | 146.4  | 280  | 44   | 115  | 223  | 165.5  |
| 2336 | 2516.6 | 1762 | 1711 | 1825 | 5242 | 2635.0 |
| 2408 | 1969.1 | 1984 | 3173 | 3580 | 5242 | 3494.5 |
| 351  | 245.6  | 226  | 149  | 189  | 126  | 172.3  |
| 969  | 426.0  | 0    | 0    | 703  | 0    | 175.7  |
| 37   | 10.1   | 0    | 0    | 7    | 1    | 2.1    |
| 2    | 11.9   | 0    | 0    | 6    | 32   | 9.6    |
| 146  | 103.6  | 203  | 59   | 84   | 66   | 103.2  |
| 2340 | 1897.6 | 2434 | 2272 | 2442 | 1901 | 2262.4 |
| 0    | 5.5    | 0    | 14   | 0    | 7    | 5.2    |
| 2684 | 2272.8 | 1876 | 1149 | 1910 | 2143 | 1769.5 |
| 1803 | 1802.1 | 1408 | 533  | 493  | 1970 | 1100.9 |
| 670  | 579.7  | 664  | 413  | 557  | 437  | 517.6  |
| 188  | 94.7   | 71   | 10   | 21   | 68   | 42.3   |
| 440  | 338.7  | 386  | 319  | 210  | 220  | 283.8  |
| 103  | 93.2   | 105  | 16   | 33   | 14   | 42.0   |
| 27   | 19.5   | 22   | 23   | 36   | 20   | 25.2   |
| 58   | 42.6   | 120  | 13   | 49   | 35   | 54.2   |
| 0    | 7.2    | 0    | 0    | 26   | 11   | 9.2    |
| 0    | 1.7    | 0    | 0    | 0    | 0    | 0.0    |
| 467  | 502.9  | 909  | 798  | 503  | 505  | 678.4  |
| 269  | 116.4  | 132  | 308  | 269  | 43   | 188.0  |
| 58   | 35.7   | 43   | 51   | 35   | 30   | 39.8   |
| 25   | 38.7   | 59   | 58   | 30   | 29   | 44.1   |
| 90   | 45.7   | 261  | 37   | 220  | 0    | 129.4  |
| 0    | 3.2    | 11   | 0    | 38   | 0    | 12.4   |
| 714  | 665.0  | 834  | 919  | 721  | 653  | 781.6  |

|      |               |      |      |      |      |               |
|------|---------------|------|------|------|------|---------------|
| 0    | <b>0.0</b>    | 24   | 0    | 105  | 0    | <b>32.3</b>   |
| 32   | <b>20.7</b>   | 36   | 16   | 15   | 9    | <b>18.9</b>   |
| 52   | <b>37.5</b>   | 100  | 54   | 125  | 16   | <b>73.5</b>   |
| 31   | <b>6.2</b>    | 4    | 0    | 0    | 0    | <b>0.9</b>    |
| 45   | <b>35.7</b>   | 56   | 60   | 78   | 10   | <b>50.7</b>   |
| 0    | <b>0.0</b>    | 0    | 0    | 152  | 0    | <b>38.0</b>   |
| 144  | <b>60.4</b>   | 153  | 77   | 240  | 0    | <b>117.3</b>  |
| 1233 | <b>973.3</b>  | 1158 | 1232 | 1221 | 272  | <b>970.9</b>  |
| 2715 | <b>2885.6</b> | 2547 | 2944 | 2278 | 3455 | <b>2806.2</b> |
| 98   | <b>67.8</b>   | 0    | 0    | 0    | 30   | <b>7.5</b>    |
| 0    | <b>10.1</b>   | 119  | 138  | 104  | 0    | <b>90.3</b>   |
| 459  | <b>678.8</b>  | 658  | 266  | 17   | 763  | <b>426.2</b>  |
| 123  | <b>24.6</b>   | 0    | 0    | 0    | 0    | <b>0.0</b>    |
| 48   | <b>32.3</b>   | 75   | 42   | 46   | 0    | <b>40.7</b>   |
| 168  | <b>405.0</b>  | 230  | 337  | 274  | 7    | <b>212.1</b>  |
| 455  | <b>146.3</b>  | 265  | 0    | 335  | 44   | <b>161.2</b>  |
| 0    | <b>50.8</b>   | 227  | 320  | 0    | 0    | <b>136.7</b>  |
| 100  | <b>104.6</b>  | 0    | 0    | 233  | 348  | <b>145.3</b>  |
| 965  | <b>1187.5</b> | 1184 | 978  | 935  | 1116 | <b>1053.1</b> |
| 137  | <b>81.1</b>   | 10   | 605  | 0    | 0    | <b>153.7</b>  |
| 111  | <b>43.4</b>   | 33   | 0    | 0    | 0    | <b>8.2</b>    |
| 123  | <b>63.8</b>   | 181  | 105  | 266  | 0    | <b>138.0</b>  |
| 232  | <b>65.8</b>   | 263  | 98   | 248  | 46   | <b>163.9</b>  |
| 307  | <b>290.0</b>  | 464  | 557  | 384  | 324  | <b>432.2</b>  |
| 0    | <b>0.0</b>    | 1186 | 717  | 1083 | 0    | <b>746.3</b>  |
| 61   | <b>70.2</b>   | 175  | 163  | 275  | 50   | <b>166.1</b>  |
| 0    | <b>1.3</b>    | 0    | 0    | 186  | 0    | <b>46.4</b>   |
| 2177 | <b>2074.4</b> | 2603 | 4939 | 5006 | 3325 | <b>3968.2</b> |
| 112  | <b>62.3</b>   | 107  | 90   | 0    | 0    | <b>49.5</b>   |
| 96   | <b>23.4</b>   | 90   | 134  | 532  | 0    | <b>188.9</b>  |
| 148  | <b>51.0</b>   | 43   | 0    | 0    | 0    | <b>10.7</b>   |
| 99   | <b>44.6</b>   | 60   | 60   | 66   | 0    | <b>46.4</b>   |
| 0    | <b>37.6</b>   | 150  | 120  | 71   | 0    | <b>85.4</b>   |
| 73   | <b>16.6</b>   | 260  | 369  | 475  | 0    | <b>276.2</b>  |
| 25   | <b>34.5</b>   | 184  | 57   | 95   | 39   | <b>93.8</b>   |
| 61   | <b>62.1</b>   | 82   | 90   | 90   | 41   | <b>75.7</b>   |
| 34   | <b>32.1</b>   | 94   | 0    | 117  | 32   | <b>60.7</b>   |
| 118  | <b>103.6</b>  | 61   | 224  | 130  | 32   | <b>111.7</b>  |
| 135  | <b>73.4</b>   | 63   | 115  | 76   | 0    | <b>63.3</b>   |
| 0    | <b>0.0</b>    | 0    | 0    | 0    | 0    | <b>0.0</b>    |
| 20   | <b>118.0</b>  | 107  | 74   | 58   | 0    | <b>59.7</b>   |
| 406  | <b>207.9</b>  | 2634 | 0    | 0    | 582  | <b>804.1</b>  |
| 80   | <b>75.3</b>   | 140  | 84   | 124  | 72   | <b>105.1</b>  |
| 1950 | <b>2548.2</b> | 2840 | 3709 | 3121 | 3175 | <b>3211.2</b> |
| 74   | <b>50.7</b>   | 129  | 14   | 91   | 39   | <b>68.3</b>   |
| 859  | <b>356.5</b>  | 0    | 0    | 0    | 624  | <b>156.1</b>  |
| 38   | <b>29.1</b>   | 8    | 12   | 25   | 0    | <b>11.3</b>   |
| 0    | <b>103.0</b>  | 6    | 21   | 12   | 14   | <b>13.2</b>   |
| 33   | <b>93.4</b>   | 117  | 104  | 141  | 130  | <b>122.9</b>  |
| 0    | <b>189.3</b>  | 0    | 0    | 2637 | 0    | <b>659.2</b>  |
| 1790 | <b>966.2</b>  | 2128 | 4189 | 0    | 1402 | <b>1929.8</b> |
| 355  | <b>1075.2</b> | 427  | 679  | 948  | 439  | <b>623.1</b>  |

|      |                |      |      |      |       |               |
|------|----------------|------|------|------|-------|---------------|
| 603  | <b>852.4</b>   | 845  | 323  | 931  | 1138  | <b>809.4</b>  |
| 137  | <b>141.5</b>   | 0    | 0    | 0    | 169   | <b>42.3</b>   |
| 0    | <b>0.0</b>     | 0    | 0    | 0    | 0     | <b>0.0</b>    |
| 160  | <b>71.5</b>    | 111  | 116  | 86   | 28    | <b>85.2</b>   |
| 68   | <b>48.7</b>    | 50   | 98   | 103  | 0     | <b>62.8</b>   |
| 398  | <b>348.5</b>   | 332  | 111  | 661  | 221   | <b>331.0</b>  |
| 85   | <b>36.5</b>    | 56   | 34   | 44   | 7     | <b>35.2</b>   |
| 211  | <b>199.4</b>   | 235  | 176  | 151  | 186   | <b>187.0</b>  |
| 120  | <b>143.3</b>   | 146  | 359  | 150  | 128   | <b>196.0</b>  |
| 177  | <b>138.5</b>   | 214  | 243  | 155  | 122   | <b>183.3</b>  |
| 92   | <b>61.6</b>    | 203  | 300  | 134  | 0     | <b>159.1</b>  |
| 83   | <b>78.7</b>    | 76   | 0    | 95   | 62    | <b>58.2</b>   |
| 232  | <b>147.0</b>   | 286  | 182  | 184  | 57    | <b>177.3</b>  |
| 340  | <b>444.7</b>   | 546  | 200  | 745  | 217   | <b>427.3</b>  |
| 279  | <b>341.6</b>   | 312  | 201  | 443  | 550   | <b>376.6</b>  |
| 72   | <b>86.8</b>    | 0    | 98   | 105  | 116   | <b>79.7</b>   |
| 72   | <b>109.9</b>   | 213  | 91   | 206  | 265   | <b>193.6</b>  |
| 72   | <b>79.7</b>    | 123  | 0    | 175  | 61    | <b>89.7</b>   |
| 101  | <b>62.2</b>    | 0    | 0    | 129  | 0     | <b>32.1</b>   |
| 91   | <b>91.0</b>    | 55   | 138  | 60   | 16    | <b>67.3</b>   |
| 0    | <b>23.8</b>    | 0    | 0    | 0    | 0     | <b>0.0</b>    |
| 80   | <b>102.7</b>   | 0    | 85   | 59   | 165   | <b>77.0</b>   |
| 78   | <b>145.7</b>   | 84   | 171  | 93   | 211   | <b>139.7</b>  |
| 16   | <b>11.9</b>    | 22   | 46   | 26   | 8     | <b>25.7</b>   |
| 270  | <b>266.1</b>   | 294  | 433  | 292  | 228   | <b>311.6</b>  |
| 129  | <b>115.9</b>   | 143  | 50   | 330  | 112   | <b>158.8</b>  |
| 55   | <b>63.3</b>    | 100  | 79   | 59   | 39    | <b>69.2</b>   |
| 269  | <b>291.2</b>   | 351  | 498  | 386  | 321   | <b>389.1</b>  |
| 114  | <b>92.9</b>    | 355  | 85   | 335  | 128   | <b>225.7</b>  |
| 36   | <b>21.8</b>    | 48   | 43   | 34   | 0     | <b>31.1</b>   |
| 49   | <b>28.5</b>    | 33   | 22   | 36   | 15    | <b>26.6</b>   |
| 79   | <b>82.8</b>    | 110  | 118  | 98   | 0     | <b>81.3</b>   |
| 2192 | <b>2135.4</b>  | 2490 | 3293 | 2914 | 1763  | <b>2615.1</b> |
| 10   | <b>24.5</b>    | 37   | 47   | 49   | 0     | <b>33.4</b>   |
| 0    | <b>0.0</b>     | 310  | 237  | 371  | 0     | <b>229.7</b>  |
| 41   | <b>44.9</b>    | 0    | 70   | 0    | 23    | <b>23.1</b>   |
| 85   | <b>61.3</b>    | 0    | 85   | 37   | 22    | <b>36.0</b>   |
| 0    | <b>2.4</b>     | 0    | 0    | 0    | 0     | <b>0.0</b>    |
| 0    | <b>6.8</b>     | 0    | 0    | 0    | 0     | <b>0.0</b>    |
| 0    | <b>0.0</b>     | 0    | 0    | 0    | 0     | <b>0.0</b>    |
| 31   | <b>23.1</b>    | 33   | 27   | 17   | 37    | <b>28.3</b>   |
| 73   | <b>79.1</b>    | 123  | 0    | 57   | 0     | <b>45.0</b>   |
| 62   | <b>102.3</b>   | 142  | 82   | 108  | 0     | <b>83.1</b>   |
| 46   | <b>79.1</b>    | 64   | 48   | 65   | 0     | <b>44.4</b>   |
| 3057 | <b>611.4</b>   | 3434 | 657  | 0    | 0     | <b>1022.7</b> |
| 231  | <b>115.9</b>   | 178  | 0    | 59   | 131   | <b>91.8</b>   |
| 0    | <b>0.0</b>     | 0    | 0    | 0    | 0     | <b>0.0</b>    |
| 9299 | <b>10475.2</b> | 7148 | 5477 | 4431 | 11695 | <b>7187.8</b> |
| 0    | <b>35.8</b>    | 139  | 0    | 30   | 14    | <b>45.6</b>   |
| 10   | <b>7.7</b>     | 21   | 0    | 21   | 31    | <b>18.3</b>   |
| 14   | <b>16.4</b>    | 31   | 0    | 17   | 48    | <b>24.0</b>   |
| 0    | <b>7.1</b>     | 16   | 0    | 21   | 8     | <b>11.3</b>   |

|      |        |      |      |      |      |        |
|------|--------|------|------|------|------|--------|
| 41   | 13.6   | 5    | 0    | 0    | 0    | 1.3    |
| 34   | 12.3   | 24   | 0    | 0    | 0    | 6.1    |
| 348  | 187.4  | 364  | 201  | 348  | 35   | 237.0  |
| 12   | 5.3    | 64   | 31   | 0    | 39   | 33.7   |
| 158  | 83.6   | 218  | 102  | 0    | 122  | 110.7  |
| 3046 | 2273.9 | 2389 | 2052 | 2213 | 3170 | 2456.2 |
| 58   | 28.9   | 39   | 34   | 52   | 6    | 32.7   |
| 0    | 0.0    | 0    | 0    | 11   | 0    | 2.7    |
| 25   | 29.0   | 121  | 60   | 0    | 3    | 45.9   |
| 87   | 60.9   | 171  | 83   | 0    | 20   | 68.4   |
| 20   | 13.5   | 0    | 0    | 0    | 1    | 0.3    |
| 0    | 0.0    | 0    | 0    | 0    | 0    | 0.0    |
| 0    | 0.0    | 0    | 0    | 11   | 0    | 2.7    |
| 576  | 299.8  | 580  | 361  | 608  | 342  | 472.8  |
| 215  | 144.8  | 362  | 286  | 0    | 207  | 213.8  |
| 1668 | 1266.2 | 1580 | 1558 | 1639 | 1819 | 1648.9 |
| 558  | 369.1  | 0    | 0    | 0    | 476  | 118.9  |
| 5    | 116.1  | 16   | 100  | 110  | 179  | 101.5  |
| 122  | 33.7   | 71   | 41   | 35   | 36   | 45.8   |
| 0    | 0.0    | 2    | 0    | 0    | 0    | 0.4    |
| 110  | 37.3   | 134  | 149  | 162  | 0    | 111.3  |
| 130  | 134.4  | 183  | 56   | 85   | 88   | 103.0  |
| 375  | 369.9  | 399  | 240  | 214  | 421  | 318.5  |
| 178  | 134.0  | 0    | 61   | 173  | 262  | 123.8  |
| 110  | 49.3   | 0    | 37   | 40   | 13   | 22.4   |
| 0    | 11.1   | 0    | 0    | 0    | 50   | 12.6   |
| 22   | 11.5   | 0    | 0    | 0    | 27   | 6.8    |
| 238  | 199.0  | 257  | 263  | 189  | 203  | 227.8  |
| 37   | 37.9   | 36   | 26   | 50   | 3    | 28.9   |
| 632  | 497.5  | 666  | 865  | 645  | 290  | 616.5  |
| 112  | 32.2   | 64   | 76   | 89   | 15   | 60.6   |
| 6313 | 7692.4 | 6232 | 7601 | 6436 | 7352 | 6905.1 |
| 967  | 363.1  | 0    | 0    | 399  | 180  | 144.8  |
| 119  | 60.5   | 158  | 91   | 111  | 52   | 103.0  |
| 115  | 76.1   | 73   | 19   | 107  | 108  | 76.9   |
| 121  | 124.6  | 96   | 46   | 86   | 257  | 121.0  |
| 24   | 36.3   | 190  | 86   | 98   | 254  | 157.0  |
| 46   | 13.5   | 268  | 75   | 214  | 0    | 139.3  |
| 656  | 527.5  | 553  | 1519 | 1006 | 663  | 935.2  |
| 75   | 24.0   | 51   | 0    | 46   | 37   | 33.3   |
| 0    | 11.8   | 0    | 149  | 34   | 8    | 47.9   |
| 225  | 194.4  | 188  | 110  | 127  | 494  | 229.7  |
| 51   | 41.4   | 0    | 0    | 0    | 75   | 18.8   |
| 62   | 24.8   | 57   | 36   | 6    | 0    | 24.6   |
| 149  | 31.0   | 0    | 74   | 85   | 19   | 44.4   |
| 0    | 35.9   | 152  | 358  | 0    | 0    | 127.5  |
| 475  | 360.8  | 414  | 219  | 284  | 408  | 331.1  |
| 148  | 106.4  | 102  | 187  | 23   | 72   | 95.9   |
| 52   | 16.4   | 0    | 1021 | 1162 | 0    | 546.0  |
| 65   | 37.0   | 163  | 78   | 60   | 0    | 75.3   |
| 162  | 162.1  | 50   | 31   | 56   | 368  | 126.2  |
| 232  | 207.1  | 318  | 177  | 0    | 204  | 174.9  |

|       |               |      |       |       |      |               |
|-------|---------------|------|-------|-------|------|---------------|
| 118   | <b>123.3</b>  | 42   | 171   | 199   | 25   | <b>109.2</b>  |
| 0     | <b>58.8</b>   | 0    | 44    | 140   | 97   | <b>70.1</b>   |
| 0     | <b>0.0</b>    | 266  | 166   | 347   | 0    | <b>194.9</b>  |
| 12    | <b>68.5</b>   | 94   | 45    | 0     | 122  | <b>65.2</b>   |
| 125   | <b>62.6</b>   | 9    | 139   | 0     | 150  | <b>74.5</b>   |
| 94    | <b>69.7</b>   | 65   | 41    | 49    | 132  | <b>72.1</b>   |
| 67    | <b>40.7</b>   | 44   | 19    | 15    | 14   | <b>23.1</b>   |
| 75    | <b>57.7</b>   | 72   | 50    | 120   | 49   | <b>72.9</b>   |
| 0     | <b>13.4</b>   | 85   | 57    | 0     | 3    | <b>36.3</b>   |
| 78    | <b>68.6</b>   | 99   | 38    | 21    | 0    | <b>39.6</b>   |
| 13    | <b>23.9</b>   | 62   | 93    | 56    | 0    | <b>52.6</b>   |
| 0     | <b>34.0</b>   | 105  | 75    | 33    | 38   | <b>62.7</b>   |
| 0     | <b>25.6</b>   | 102  | 146   | 139   | 0    | <b>96.8</b>   |
| 128   | <b>112.4</b>  | 180  | 199   | 426   | 201  | <b>251.6</b>  |
| 850   | <b>722.5</b>  | 709  | 376   | 361   | 0    | <b>361.6</b>  |
| 0     | <b>0.0</b>    | 0    | 0     | 0     | 0    | <b>0.0</b>    |
| 79    | <b>44.8</b>   | 78   | 51    | 19    | 16   | <b>41.1</b>   |
| 175   | <b>96.0</b>   | 180  | 199   | 207   | 0    | <b>146.5</b>  |
| 221   | <b>138.5</b>  | 334  | 288   | 269   | 20   | <b>227.9</b>  |
| 236   | <b>183.4</b>  | 235  | 136   | 183   | 0    | <b>138.6</b>  |
| 166   | <b>111.4</b>  | 122  | 73    | 0     | 836  | <b>257.7</b>  |
| 0     | <b>42.1</b>   | 111  | 152   | 295   | 72   | <b>157.1</b>  |
| 282   | <b>238.2</b>  | 266  | 145   | 199   | 0    | <b>152.3</b>  |
| 113   | <b>47.2</b>   | 0    | 57    | 0     | 148  | <b>51.3</b>   |
| 990   | <b>790.5</b>  | 779  | 934   | 832   | 1132 | <b>919.2</b>  |
| 432   | <b>336.1</b>  | 499  | 0     | 0     | 0    | <b>124.8</b>  |
| 0     | <b>160.6</b>  | 229  | 0     | 130   | 111  | <b>117.4</b>  |
| 553   | <b>336.3</b>  | 623  | 263   | 468   | 145  | <b>374.8</b>  |
| 166   | <b>127.3</b>  | 72   | 0     | 18    | 73   | <b>40.6</b>   |
| 120   | <b>53.3</b>   | 7    | 0     | 125   | 15   | <b>36.7</b>   |
| 599   | <b>558.0</b>  | 1028 | 1117  | 560   | 308  | <b>753.2</b>  |
| 0     | <b>0.0</b>    | 0    | 105   | 98    | 0    | <b>50.6</b>   |
| 0     | <b>0.0</b>    | 25   | 35    | 0     | 0    | <b>15.2</b>   |
| 319   | <b>362.1</b>  | 780  | 692   | 1227  | 115  | <b>703.4</b>  |
| 399   | <b>484.0</b>  | 632  | 417   | 285   | 265  | <b>399.7</b>  |
| 0     | <b>0.0</b>    | 0    | 252   | 447   | 0    | <b>174.9</b>  |
| 0     | <b>19.8</b>   | 268  | 0     | 0     | 0    | <b>66.9</b>   |
| 305   | <b>244.1</b>  | 189  | 231   | 240   | 49   | <b>177.0</b>  |
| 2512  | <b>2481.2</b> | 3286 | 3976  | 3611  | 2521 | <b>3348.5</b> |
| 0     | <b>0.0</b>    | 55   | 145   | 67    | 0    | <b>66.8</b>   |
| 9     | <b>6.2</b>    | 0    | 17    | 0     | 0    | <b>4.3</b>    |
| 21    | <b>10.5</b>   | 823  | 664   | 1029  | 0    | <b>629.1</b>  |
| 0     | <b>32.6</b>   | 194  | 216   | 82    | 26   | <b>129.4</b>  |
| 4195  | <b>3625.1</b> | 5138 | 3949  | 4489  | 2973 | <b>4137.3</b> |
| 1528  | <b>1302.5</b> | 1494 | 1476  | 1100  | 1043 | <b>1278.3</b> |
| 0     | <b>85.0</b>   | 242  | 124   | 143   | 0    | <b>127.3</b>  |
| 11050 | <b>7526.5</b> | 8400 | 10390 | 10890 | 1880 | <b>7890.1</b> |
| 0     | <b>41.7</b>   | 0    | 59    | 0     | 0    | <b>14.6</b>   |
| 25    | <b>39.6</b>   | 147  | 103   | 0     | 0    | <b>62.4</b>   |
| 0     | <b>0.0</b>    | 0    | 0     | 0     | 125  | <b>31.3</b>   |
| 424   | <b>406.0</b>  | 472  | 404   | 66    | 538  | <b>369.9</b>  |
| 1221  | <b>1078.1</b> | 1245 | 1097  | 1326  | 1342 | <b>1252.7</b> |

|       |                |       |       |       |       |                |
|-------|----------------|-------|-------|-------|-------|----------------|
| 24017 | <b>14831.9</b> | 15376 | 20831 | 17387 | 16231 | <b>17456.4</b> |
| 0     | <b>3.3</b>     | 69    | 0     | 0     | 0     | <b>17.3</b>    |
| 0     | <b>22.9</b>    | 0     | 0     | 0     | 0     | <b>0.0</b>     |
| 86    | <b>58.5</b>    | 69    | 88    | 71    | 59    | <b>71.5</b>    |
| 381   | <b>195.2</b>   | 77    | 65    | 52    | 150   | <b>86.1</b>    |
| 151   | <b>172.4</b>   | 363   | 423   | 519   | 144   | <b>362.2</b>   |
| 0     | <b>111.4</b>   | 278   | 235   | 0     | 90    | <b>150.8</b>   |
| 38    | <b>35.1</b>    | 67    | 54    | 47    | 50    | <b>54.5</b>    |
| 0     | <b>8.9</b>     | 17    | 27    | 16    | 18    | <b>19.6</b>    |
| 17    | <b>13.9</b>    | 38    | 47    | 0     | 45    | <b>32.5</b>    |
| 288   | <b>141.6</b>   | 212   | 211   | 318   | 105   | <b>211.8</b>   |
| 0     | <b>20.6</b>    | 118   | 45    | 75    | 91    | <b>82.5</b>    |
| 0     | <b>0.0</b>     | 28    | 0     | 0     | 0     | <b>6.9</b>     |
| 0     | <b>61.8</b>    | 31    | 60    | 0     | 83    | <b>43.6</b>    |
| 14    | <b>10.1</b>    | 0     | 0     | 21    | 37    | <b>14.6</b>    |
| 0     | <b>57.8</b>    | 113   | 138   | 197   | 106   | <b>138.5</b>   |
| 0     | <b>108.2</b>   | 202   | 275   | 192   | 65    | <b>183.5</b>   |
| 48    | <b>100.3</b>   | 61    | 55    | 46    | 0     | <b>40.5</b>    |
| 45    | <b>63.3</b>    | 41    | 41    | 39    | 0     | <b>30.4</b>    |
| 0     | <b>0.0</b>     | 0     | 185   | 0     | 55    | <b>59.9</b>    |
| 344   | <b>68.9</b>    | 0     | 0     | 0     | 0     | <b>0.0</b>     |
| 192   | <b>87.4</b>    | 178   | 0     | 210   | 89    | <b>119.4</b>   |
| 58    | <b>22.6</b>    | 0     | 0     | 34    | 0     | <b>8.4</b>     |
| 17    | <b>7.0</b>     | 29    | 0     | 28    | 45    | <b>25.5</b>    |
| 6494  | <b>5931.5</b>  | 6056  | 5794  | 5640  | 6445  | <b>5984.0</b>  |
| 0     | <b>0.0</b>     | 0     | 0     | 0     | 0     | <b>0.0</b>     |
| 2091  | <b>1761.9</b>  | 2425  | 2047  | 1849  | 1253  | <b>1893.6</b>  |
| 1999  | <b>2079.4</b>  | 0     | 1240  | 1425  | 2900  | <b>1391.4</b>  |
| 564   | <b>642.1</b>   | 423   | 230   | 348   | 1217  | <b>554.5</b>   |
| 582   | <b>681.7</b>   | 597   | 230   | 316   | 0     | <b>285.9</b>   |
| 278   | <b>169.8</b>   | 287   | 0     | 185   | 235   | <b>176.8</b>   |
| 0     | <b>0.0</b>     | 0     | 0     | 0     | 0     | <b>0.0</b>     |
| 28    | <b>16.8</b>    | 25    | 23    | 18    | 4     | <b>17.5</b>    |
| 12    | <b>6.0</b>     | 19    | 0     | 0     | 0     | <b>4.8</b>     |
| 11    | <b>28.9</b>    | 25    | 16    | 28    | 1     | <b>17.5</b>    |
| 0     | <b>18.9</b>    | 22    | 0     | 15    | 6     | <b>10.7</b>    |
| 76    | <b>15.1</b>    | 64    | 0     | 0     | 0     | <b>15.9</b>    |
| 39    | <b>17.1</b>    | 90    | 22    | 20    | 0     | <b>32.9</b>    |
| 1180  | <b>1047.1</b>  | 1092  | 1226  | 1338  | 963   | <b>1154.7</b>  |
| 90    | <b>83.4</b>    | 0     | 35    | 74    | 79    | <b>47.1</b>    |
| 1434  | <b>1196.4</b>  | 1310  | 1241  | 1116  | 1313  | <b>1245.0</b>  |
| 130   | <b>225.3</b>   | 0     | 88    | 0     | 602   | <b>172.5</b>   |
| 143   | <b>28.6</b>    | 0     | 0     | 0     | 0     | <b>0.0</b>     |
| 553   | <b>458.9</b>   | 489   | 243   | 442   | 568   | <b>435.4</b>   |
| 62    | <b>88.9</b>    | 48    | 46    | 60    | 61    | <b>53.8</b>    |
| 126   | <b>51.9</b>    | 81    | 22    | 58    | 7     | <b>41.9</b>    |
| 638   | <b>568.2</b>   | 456   | 517   | 602   | 532   | <b>526.7</b>   |
| 357   | <b>316.1</b>   | 262   | 183   | 236   | 385   | <b>266.6</b>   |
| 1739  | <b>2802.0</b>  | 2211  | 1388  | 1278  | 3432  | <b>2077.5</b>  |
| 98    | <b>272.7</b>   | 469   | 6     | 115   | 0     | <b>147.5</b>   |
| 105   | <b>77.6</b>    | 83    | 77    | 0     | 129   | <b>72.4</b>    |
| 100   | <b>74.3</b>    | 106   | 5     | 47    | 79    | <b>59.4</b>    |

|      |               |      |      |      |      |               |
|------|---------------|------|------|------|------|---------------|
| 525  | <b>460.0</b>  | 808  | 329  | 446  | 0    | <b>395.8</b>  |
| 288  | <b>221.6</b>  | 320  | 354  | 292  | 202  | <b>292.2</b>  |
| 112  | <b>77.0</b>   | 66   | 44   | 91   | 61   | <b>65.4</b>   |
| 112  | <b>97.6</b>   | 86   | 77   | 60   | 0    | <b>55.7</b>   |
| 464  | <b>409.3</b>  | 470  | 430  | 415  | 567  | <b>470.4</b>  |
| 141  | <b>79.4</b>   | 155  | 135  | 163  | 0    | <b>113.0</b>  |
| 128  | <b>75.8</b>   | 96   | 91   | 71   | 0    | <b>64.6</b>   |
| 394  | <b>291.5</b>  | 308  | 294  | 260  | 309  | <b>292.8</b>  |
| 794  | <b>503.1</b>  | 871  | 0    | 486  | 728  | <b>521.2</b>  |
| 250  | <b>168.0</b>  | 146  | 169  | 183  | 99   | <b>149.2</b>  |
| 62   | <b>46.1</b>   | 66   | 24   | 68   | 0    | <b>39.5</b>   |
| 44   | <b>44.0</b>   | 73   | 104  | 54   | 67   | <b>74.2</b>   |
| 0    | <b>15.8</b>   | 96   | 0    | 0    | 0    | <b>24.1</b>   |
| 0    | <b>0.0</b>    | 0    | 0    | 0    | 0    | <b>0.0</b>    |
| 0    | <b>28.4</b>   | 44   | 0    | 0    | 0    | <b>11.0</b>   |
| 0    | <b>1.5</b>    | 0    | 0    | 0    | 0    | <b>0.0</b>    |
| 0    | <b>2.4</b>    | 0    | 0    | 0    | 0    | <b>0.0</b>    |
| 203  | <b>125.0</b>  | 208  | 157  | 0    | 61   | <b>106.5</b>  |
| 0    | <b>26.5</b>   | 0    | 0    | 0    | 0    | <b>0.0</b>    |
| 0    | <b>31.6</b>   | 0    | 0    | 0    | 0    | <b>0.0</b>    |
| 99   | <b>104.2</b>  | 92   | 152  | 201  | 0    | <b>111.4</b>  |
| 954  | <b>895.3</b>  | 909  | 1059 | 1135 | 912  | <b>1003.8</b> |
| 113  | <b>95.7</b>   | 106  | 114  | 140  | 18   | <b>94.4</b>   |
| 66   | <b>88.4</b>   | 90   | 66   | 36   | 67   | <b>64.7</b>   |
| 251  | <b>176.0</b>  | 188  | 346  | 326  | 0    | <b>214.8</b>  |
| 289  | <b>177.2</b>  | 242  | 256  | 218  | 109  | <b>206.2</b>  |
| 11   | <b>11.1</b>   | 39   | 12   | 30   | 8    | <b>22.1</b>   |
| 112  | <b>83.8</b>   | 43   | 0    | 44   | 101  | <b>47.1</b>   |
| 110  | <b>110.4</b>  | 112  | 125  | 121  | 25   | <b>95.7</b>   |
| 154  | <b>64.0</b>   | 149  | 154  | 110  | 61   | <b>118.6</b>  |
| 142  | <b>94.1</b>   | 111  | 137  | 98   | 58   | <b>101.1</b>  |
| 30   | <b>55.5</b>   | 51   | 114  | 57   | 74   | <b>73.9</b>   |
| 14   | <b>26.3</b>   | 9    | 4    | 22   | 38   | <b>18.5</b>   |
| 958  | <b>957.3</b>  | 818  | 867  | 836  | 1033 | <b>888.4</b>  |
| 117  | <b>65.6</b>   | 79   | 86   | 109  | 14   | <b>71.8</b>   |
| 59   | <b>26.8</b>   | 78   | 25   | 59   | 42   | <b>51.1</b>   |
| 1173 | <b>1051.1</b> | 825  | 1162 | 844  | 1005 | <b>958.9</b>  |
| 68   | <b>45.8</b>   | 58   | 78   | 63   | 64   | <b>65.8</b>   |
| 0    | <b>40.0</b>   | 0    | 58   | 102  | 0    | <b>40.1</b>   |
| 0    | <b>0.0</b>    | 0    | 0    | 0    | 0    | <b>0.0</b>    |
| 264  | <b>251.6</b>  | 439  | 451  | 420  | 132  | <b>360.4</b>  |
| 0    | <b>47.9</b>   | 0    | 16   | 18   | 70   | <b>26.1</b>   |
| 774  | <b>209.2</b>  | 92   | 51   | 98   | 12   | <b>63.3</b>   |
| 54   | <b>126.6</b>  | 116  | 18   | 90   | 119  | <b>85.8</b>   |
| 47   | <b>108.2</b>  | 32   | 95   | 300  | 0    | <b>106.8</b>  |
| 3974 | <b>3287.0</b> | 2946 | 2509 | 2851 | 2501 | <b>2701.7</b> |
| 116  | <b>84.5</b>   | 61   | 60   | 63   | 69   | <b>63.3</b>   |
| 0    | <b>35.9</b>   | 100  | 220  | 0    | 170  | <b>122.5</b>  |
| 0    | <b>342.5</b>  | 0    | 0    | 231  | 0    | <b>57.8</b>   |
| 168  | <b>123.5</b>  | 163  | 233  | 120  | 119  | <b>158.5</b>  |
| 131  | <b>99.9</b>   | 113  | 87   | 101  | 38   | <b>84.9</b>   |
| 34   | <b>19.7</b>   | 31   | 23   | 13   | 0    | <b>16.7</b>   |



|      |        |      |      |      |      |        |
|------|--------|------|------|------|------|--------|
| 0    | 1.6    | 60   | 0    | 0    | 92   | 38.0   |
| 0    | 64.8   | 0    | 74   | 0    | 0    | 18.6   |
| 0    | 0.0    | 0    | 0    | 0    | 0    | 0.0    |
| 0    | 14.1   | 136  | 0    | 0    | 0    | 34.1   |
| 387  | 239.0  | 0    | 0    | 0    | 319  | 79.8   |
| 2686 | 2204.1 | 2631 | 2948 | 2383 | 3325 | 2821.7 |
| 0    | 448.0  | 0    | 0    | 0    | 0    | 0.0    |
| 94   | 90.7   | 57   | 43   | 50   | 64   | 53.6   |
| 391  | 303.2  | 312  | 383  | 385  | 330  | 352.3  |
| 214  | 172.2  | 156  | 224  | 192  | 163  | 183.7  |
| 3058 | 2952.9 | 2858 | 3160 | 3127 | 3801 | 3236.4 |
| 285  | 148.3  | 142  | 29   | 105  | 21   | 74.3   |
| 90   | 78.9   | 67   | 73   | 85   | 156  | 95.3   |
| 102  | 89.0   | 84   | 105  | 94   | 38   | 80.3   |
| 103  | 116.2  | 81   | 60   | 85   | 65   | 72.7   |
| 36   | 46.1   | 52   | 41   | 38   | 54   | 46.3   |
| 103  | 107.9  | 14   | 72   | 166  | 112  | 91.0   |
| 136  | 128.8  | 117  | 43   | 194  | 83   | 108.9  |
| 0    | 1.4    | 24   | 57   | 25   | 13   | 29.6   |
| 367  | 100.6  | 0    | 0    | 116  | 300  | 104.1  |
| 307  | 203.6  | 296  | 306  | 258  | 273  | 283.3  |
| 89   | 45.5   | 54   | 0    | 0    | 56   | 27.4   |
| 139  | 75.4   | 120  | 0    | 110  | 80   | 77.4   |
| 126  | 152.4  | 94   | 139  | 26   | 0    | 64.8   |
| 67   | 38.0   | 51   | 62   | 38   | 0    | 37.7   |
| 413  | 343.2  | 325  | 324  | 324  | 479  | 363.2  |
| 490  | 265.3  | 328  | 0    | 378  | 533  | 309.9  |
| 137  | 58.8   | 6    | 0    | 135  | 40   | 45.1   |
| 129  | 137.4  | 185  | 147  | 162  | 190  | 171.0  |
| 146  | 49.9   | 8    | 54   | 59   | 0    | 30.4   |
| 121  | 148.3  | 167  | 220  | 142  | 157  | 171.4  |
| 0    | 47.4   | 30   | 49   | 55   | 23   | 39.0   |
| 92   | 51.8   | 65   | 89   | 49   | 36   | 59.8   |
| 44   | 55.5   | 69   | 59   | 68   | 0    | 49.1   |
| 37   | 7.7    | 61   | 46   | 0    | 6    | 28.3   |
| 56   | 11.2   | 0    | 0    | 0    | 0    | 0.0    |
| 703  | 175.8  | 0    | 0    | 0    | 78   | 19.5   |
| 41   | 26.9   | 16   | 16   | 27   | 36   | 23.9   |
| 34   | 34.6   | 39   | 51   | 45   | 34   | 42.3   |
| 26   | 29.9   | 0    | 0    | 134  | 0    | 33.4   |
| 146  | 29.2   | 0    | 0    | 0    | 76   | 18.9   |
| 37   | 7.3    | 0    | 0    | 0    | 0    | 0.0    |
| 0    | 0.0    | 0    | 0    | 0    | 0    | 0.0    |
| 810  | 811.0  | 855  | 0    | 707  | 1003 | 641.4  |
| 224  | 116.0  | 168  | 0    | 136  | 168  | 117.9  |
| 0    | 0.0    | 0    | 0    | 0    | 34   | 8.6    |
| 59   | 60.7   | 154  | 0    | 39   | 45   | 59.4   |
| 414  | 322.1  | 436  | 330  | 360  | 252  | 344.4  |
| 1554 | 1690.2 | 1453 | 961  | 1098 | 2386 | 1474.6 |
| 0    | 61.3   | 0    | 0    | 0    | 0    | 0.0    |
| 557  | 264.0  | 562  | 378  | 433  | 308  | 420.3  |
| 92   | 105.2  | 115  | 90   | 116  | 47   | 92.0   |

|      |               |      |      |      |      |               |
|------|---------------|------|------|------|------|---------------|
| 757  | <b>502.1</b>  | 779  | 451  | 558  | 0    | <b>447.0</b>  |
| 0    | <b>40.6</b>   | 0    | 0    | 20   | 0    | <b>5.1</b>    |
| 94   | <b>55.2</b>   | 85   | 28   | 53   | 73   | <b>59.8</b>   |
| 0    | <b>25.6</b>   | 26   | 0    | 37   | 68   | <b>33.0</b>   |
| 1796 | <b>1947.8</b> | 1374 | 903  | 1325 | 1403 | <b>1251.2</b> |
| 557  | <b>486.0</b>  | 426  | 440  | 557  | 377  | <b>449.9</b>  |
| 19   | <b>50.4</b>   | 17   | 73   | 33   | 106  | <b>57.0</b>   |
| 0    | <b>1.4</b>    | 0    | 0    | 0    | 0    | <b>0.0</b>    |
| 476  | <b>519.6</b>  | 545  | 399  | 466  | 423  | <b>458.0</b>  |
| 200  | <b>181.7</b>  | 132  | 0    | 98   | 69   | <b>74.9</b>   |
| 1386 | <b>1456.0</b> | 1147 | 611  | 1184 | 2053 | <b>1248.8</b> |
| 170  | <b>170.6</b>  | 164  | 149  | 155  | 209  | <b>169.1</b>  |
| 470  | <b>94.1</b>   | 0    | 0    | 0    | 543  | <b>135.8</b>  |
| 318  | <b>337.3</b>  | 325  | 117  | 330  | 462  | <b>308.4</b>  |
| 1076 | <b>967.3</b>  | 804  | 845  | 1092 | 401  | <b>785.6</b>  |
| 0    | <b>5.5</b>    | 0    | 0    | 0    | 0    | <b>0.0</b>    |
| 461  | <b>547.9</b>  | 1105 | 290  | 906  | 653  | <b>738.6</b>  |
| 190  | <b>100.1</b>  | 135  | 114  | 105  | 29   | <b>95.8</b>   |
| 0    | <b>65.1</b>   | 73   | 0    | 389  | 36   | <b>124.6</b>  |
| 2237 | <b>2383.7</b> | 1953 | 1924 | 1954 | 2973 | <b>2201.0</b> |
| 703  | <b>596.2</b>  | 549  | 598  | 584  | 537  | <b>566.7</b>  |
| 83   | <b>64.0</b>   | 50   | 0    | 65   | 98   | <b>53.4</b>   |
| 186  | <b>189.2</b>  | 179  | 99   | 130  | 190  | <b>149.6</b>  |
| 286  | <b>337.1</b>  | 298  | 205  | 278  | 373  | <b>288.4</b>  |
| 340  | <b>417.9</b>  | 200  | 107  | 241  | 663  | <b>302.5</b>  |
| 0    | <b>30.6</b>   | 71   | 0    | 0    | 271  | <b>85.4</b>   |
| 252  | <b>186.5</b>  | 194  | 133  | 242  | 485  | <b>263.5</b>  |
| 89   | <b>45.6</b>   | 0    | 0    | 0    | 0    | <b>0.0</b>    |
| 0    | <b>17.1</b>   | 157  | 68   | 143  | 42   | <b>102.5</b>  |
| 533  | <b>636.5</b>  | 488  | 485  | 510  | 747  | <b>557.4</b>  |
| 0    | <b>8.3</b>    | 0    | 0    | 0    | 46   | <b>11.4</b>   |
| 83   | <b>73.5</b>   | 60   | 50   | 97   | 53   | <b>64.9</b>   |
| 177  | <b>229.2</b>  | 190  | 242  | 190  | 214  | <b>208.9</b>  |
| 318  | <b>248.7</b>  | 369  | 189  | 285  | 0    | <b>210.9</b>  |
| 2982 | <b>3002.5</b> | 2502 | 2992 | 2913 | 3103 | <b>2877.7</b> |
| 83   | <b>39.5</b>   | 85   | 0    | 104  | 52   | <b>60.2</b>   |
| 15   | <b>27.2</b>   | 0    | 0    | 0    | 40   | <b>10.0</b>   |
| 25   | <b>29.6</b>   | 10   | 0    | 20   | 29   | <b>14.7</b>   |
| 52   | <b>23.6</b>   | 20   | 37   | 18   | 23   | <b>24.6</b>   |
| 55   | <b>48.6</b>   | 76   | 46   | 64   | 55   | <b>60.4</b>   |
| 19   | <b>24.5</b>   | 45   | 11   | 32   | 50   | <b>34.2</b>   |
| 1560 | <b>1532.3</b> | 1758 | 1707 | 1702 | 1416 | <b>1645.7</b> |
| 572  | <b>639.7</b>  | 267  | 846  | 462  | 303  | <b>469.3</b>  |
| 768  | <b>620.8</b>  | 386  | 562  | 683  | 182  | <b>453.2</b>  |
| 73   | <b>84.2</b>   | 101  | 0    | 0    | 35   | <b>34.0</b>   |
| 0    | <b>280.6</b>  | 0    | 0    | 266  | 500  | <b>191.4</b>  |
| 874  | <b>677.3</b>  | 790  | 1264 | 563  | 367  | <b>745.7</b>  |
| 0    | <b>39.9</b>   | 10   | 0    | 0    | 0    | <b>2.4</b>    |
| 665  | <b>670.3</b>  | 617  | 685  | 839  | 630  | <b>692.7</b>  |
| 181  | <b>200.3</b>  | 132  | 146  | 203  | 190  | <b>167.7</b>  |
| 2850 | <b>4008.8</b> | 4172 | 3746 | 2411 | 4017 | <b>3586.5</b> |
| 0    | <b>52.6</b>   | 142  | 93   | 158  | 75   | <b>116.7</b>  |

|      |               |      |      |      |      |               |
|------|---------------|------|------|------|------|---------------|
| 1271 | <b>1045.9</b> | 923  | 483  | 950  | 900  | <b>814.1</b>  |
| 158  | <b>143.5</b>  | 0    | 22   | 0    | 0    | <b>5.5</b>    |
| 89   | <b>81.8</b>   | 69   | 16   | 53   | 150  | <b>71.8</b>   |
| 199  | <b>168.9</b>  | 102  | 115  | 82   | 275  | <b>143.7</b>  |
| 0    | <b>20.1</b>   | 0    | 343  | 0    | 252  | <b>148.8</b>  |
| 499  | <b>257.0</b>  | 339  | 183  | 359  | 148  | <b>257.1</b>  |
| 0    | <b>4.4</b>    | 0    | 0    | 61   | 40   | <b>25.3</b>   |
| 100  | <b>23.4</b>   | 0    | 0    | 71   | 219  | <b>72.5</b>   |
| 46   | <b>44.3</b>   | 46   | 69   | 51   | 28   | <b>48.2</b>   |
| 3017 | <b>2877.3</b> | 2539 | 1525 | 2630 | 5177 | <b>2967.8</b> |
| 635  | <b>531.1</b>  | 648  | 345  | 0    | 0    | <b>248.3</b>  |
| 539  | <b>204.8</b>  | 0    | 291  | 0    | 10   | <b>75.2</b>   |
| 91   | <b>42.5</b>   | 189  | 113  | 203  | 11   | <b>129.1</b>  |
| 95   | <b>191.8</b>  | 124  | 148  | 100  | 470  | <b>210.4</b>  |
| 392  | <b>219.4</b>  | 235  | 286  | 300  | 0    | <b>205.2</b>  |
| 44   | <b>176.8</b>  | 58   | 75   | 30   | 124  | <b>71.7</b>   |
| 80   | <b>88.3</b>   | 95   | 130  | 94   | 96   | <b>103.8</b>  |
| 332  | <b>400.5</b>  | 456  | 542  | 375  | 574  | <b>487.0</b>  |
| 256  | <b>245.7</b>  | 315  | 284  | 312  | 311  | <b>305.4</b>  |
| 31   | <b>24.0</b>   | 44   | 77   | 71   | 47   | <b>59.9</b>   |
| 18   | <b>44.4</b>   | 32   | 12   | 18   | 75   | <b>34.0</b>   |
| 72   | <b>93.4</b>   | 42   | 62   | 40   | 185  | <b>82.0</b>   |
| 280  | <b>326.1</b>  | 250  | 191  | 258  | 580  | <b>319.7</b>  |
| 94   | <b>61.0</b>   | 151  | 94   | 138  | 42   | <b>106.3</b>  |
| 0    | <b>51.2</b>   | 47   | 0    | 30   | 50   | <b>31.9</b>   |
| 84   | <b>89.4</b>   | 119  | 128  | 97   | 103  | <b>111.9</b>  |
| 724  | <b>854.7</b>  | 1254 | 1131 | 1150 | 1139 | <b>1168.4</b> |
| 37   | <b>36.3</b>   | 44   | 38   | 38   | 100  | <b>55.1</b>   |
| 40   | <b>31.4</b>   | 65   | 28   | 42   | 0    | <b>33.6</b>   |
| 27   | <b>42.3</b>   | 27   | 0    | 23   | 57   | <b>26.8</b>   |
| 66   | <b>122.2</b>  | 94   | 67   | 67   | 56   | <b>71.0</b>   |
| 363  | <b>352.8</b>  | 338  | 322  | 490  | 239  | <b>347.3</b>  |
| 0    | <b>55.7</b>   | 379  | 347  | 277  | 182  | <b>295.9</b>  |
| 296  | <b>105.3</b>  | 171  | 232  | 352  | 0    | <b>188.8</b>  |
| 632  | <b>477.8</b>  | 542  | 645  | 1126 | 229  | <b>635.3</b>  |
| 15   | <b>12.4</b>   | 17   | 6    | 20   | 0    | <b>10.8</b>   |
| 47   | <b>51.9</b>   | 89   | 89   | 67   | 62   | <b>76.6</b>   |
| 1016 | <b>720.6</b>  | 1078 | 895  | 1935 | 921  | <b>1207.2</b> |
| 79   | <b>67.2</b>   | 73   | 33   | 57   | 102  | <b>66.2</b>   |
| 103  | <b>125.2</b>  | 96   | 84   | 114  | 222  | <b>128.9</b>  |
| 46   | <b>50.9</b>   | 52   | 109  | 43   | 102  | <b>76.4</b>   |
| 0    | <b>0.0</b>    | 303  | 181  | 165  | 0    | <b>162.2</b>  |
| 72   | <b>80.0</b>   | 134  | 90   | 193  | 55   | <b>117.9</b>  |
| 0    | <b>0.0</b>    | 27   | 18   | 39   | 0    | <b>21.1</b>   |
| 0    | <b>0.0</b>    | 0    | 0    | 0    | 0    | <b>0.0</b>    |
| 1260 | <b>1079.0</b> | 1362 | 1318 | 1972 | 1583 | <b>1558.6</b> |
| 206  | <b>227.8</b>  | 237  | 145  | 190  | 318  | <b>222.3</b>  |
| 0    | <b>7.6</b>    | 0    | 0    | 18   | 0    | <b>4.5</b>    |
| 0    | <b>6.0</b>    | 0    | 0    | 82   | 0    | <b>20.4</b>   |
| 13   | <b>38.1</b>   | 52   | 0    | 69   | 34   | <b>39.0</b>   |
| 1531 | <b>1296.6</b> | 831  | 448  | 1024 | 1372 | <b>918.6</b>  |
| 1032 | <b>1108.5</b> | 994  | 945  | 993  | 1322 | <b>1063.5</b> |

|      |        |       |      |       |       |         |
|------|--------|-------|------|-------|-------|---------|
| 0    | 55.8   | 0     | 0    | 0     | 179   | 44.7    |
| 0    | 108.8  | 0     | 22   | 0     | 70    | 22.8    |
| 172  | 106.1  | 241   | 55   | 177   | 39    | 128.0   |
| 4478 | 5489.6 | 4549  | 2630 | 3758  | 6915  | 4463.1  |
| 296  | 431.9  | 290   | 312  | 428   | 145   | 293.7   |
| 1393 | 1568.5 | 1631  | 1287 | 1664  | 2220  | 1700.5  |
| 9898 | 9476.0 | 11512 | 8466 | 10209 | 14178 | 11091.5 |
| 236  | 301.0  | 278   | 211  | 215   | 48    | 188.2   |
| 291  | 1095.2 | 247   | 302  | 369   | 474   | 348.0   |
| 277  | 226.3  | 232   | 110  | 278   | 368   | 247.0   |
| 809  | 727.5  | 766   | 525  | 756   | 789   | 709.0   |
| 1148 | 229.5  | 0     | 0    | 0     | 0     | 0.0     |
| 1590 | 1661.6 | 1614  | 1200 | 1740  | 1637  | 1547.9  |
| 2666 | 3262.3 | 2929  | 2419 | 3301  | 4050  | 3174.5  |
| 42   | 782.1  | 0     | 878  | 0     | 881   | 439.7   |
| 0    | 0.0    | 0     | 226  | 0     | 43    | 67.3    |
| 470  | 222.0  | 0     | 376  | 0     | 61    | 109.3   |
| 117  | 99.9   | 107   | 31   | 85    | 81    | 76.1    |
| 0    | 61.0   | 0     | 0    | 0     | 228   | 57.0    |
| 0    | 450.7  | 0     | 304  | 0     | 156   | 115.1   |
| 15   | 83.0   | 64    | 39   | 73    | 124   | 74.9    |
| 1525 | 1046.9 | 2299  | 1079 | 1339  | 1177  | 1473.7  |
| 664  | 472.4  | 404   | 464  | 644   | 268   | 444.8   |
| 0    | 0.0    | 0     | 0    | 0     | 0     | 0.0     |
| 807  | 382.7  | 549   | 549  | 688   | 438   | 556.1   |
| 3226 | 3039.1 | 2867  | 3273 | 3570  | 1200  | 2727.3  |
| 0    | 29.1   | 0     | 111  | 0     | 2     | 28.4    |
| 0    | 23.3   | 35    | 0    | 21    | 59    | 28.5    |
| 129  | 66.4   | 0     | 0    | 0     | 33    | 8.3     |
| 224  | 294.3  | 156   | 36   | 140   | 356   | 172.1   |
| 123  | 54.3   | 69    | 141  | 101   | 0     | 77.7    |
| 4988 | 5402.7 | 4414  | 4287 | 5343  | 6955  | 5250.1  |
| 420  | 341.3  | 280   | 319  | 321   | 564   | 371.0   |
| 399  | 547.6  | 326   | 159  | 348   | 714   | 386.7   |
| 314  | 233.2  | 260   | 226  | 312   | 429   | 306.6   |
| 959  | 1168.4 | 999   | 1044 | 1082  | 1296  | 1105.1  |
| 12   | 35.4   | 0     | 0    | 0     | 49    | 12.1    |
| 120  | 127.0  | 70    | 63   | 122   | 14    | 67.0    |
| 150  | 135.1  | 106   | 139  | 167   | 0     | 103.1   |
| 2336 | 2262.9 | 2356  | 1372 | 2358  | 0     | 1521.4  |
| 551  | 751.8  | 367   | 611  | 802   | 0     | 444.9   |
| 188  | 219.0  | 145   | 0    | 0     | 917   | 265.5   |
| 64   | 55.6   | 65    | 0    | 76    | 63    | 50.9    |
| 129  | 183.8  | 142   | 113  | 156   | 189   | 150.1   |
| 284  | 409.0  | 269   | 172  | 343   | 321   | 276.3   |
| 146  | 173.2  | 103   | 55   | 146   | 121   | 106.4   |
| 151  | 110.8  | 126   | 142  | 103   | 0     | 92.7    |
| 101  | 135.5  | 147   | 152  | 204   | 117   | 155.3   |
| 164  | 102.9  | 109   | 0    | 95    | 0     | 51.1    |
| 167  | 148.6  | 188   | 120  | 192   | 145   | 161.1   |
| 0    | 38.0   | 84    | 24   | 35    | 26    | 42.2    |
| 73   | 53.2   | 51    | 0    | 74    | 98    | 55.6    |

|       |                |       |       |       |       |                |
|-------|----------------|-------|-------|-------|-------|----------------|
| 54    | <b>110.4</b>   | 17    | 0     | 0     | 134   | <b>37.7</b>    |
| 4860  | <b>6178.8</b>  | 2651  | 3423  | 7754  | 0     | <b>3456.9</b>  |
| 12872 | <b>12242.2</b> | 13606 | 13704 | 10225 | 14240 | <b>12943.8</b> |
| 513   | <b>575.6</b>   | 311   | 264   | 708   | 385   | <b>417.4</b>   |
| 0     | <b>9.2</b>     | 0     | 0     | 0     | 0     | <b>0.0</b>     |
| 0     | <b>42.6</b>    | 0     | 0     | 0     | 303   | <b>75.7</b>    |
| 316   | <b>353.2</b>   | 402   | 390   | 416   | 590   | <b>449.5</b>   |
| 791   | <b>804.0</b>   | 942   | 861   | 543   | 1490  | <b>958.9</b>   |
| 2108  | <b>1890.1</b>  | 1726  | 1025  | 1580  | 1113  | <b>1360.9</b>  |
| 267   | <b>285.8</b>   | 79    | 205   | 252   | 168   | <b>175.9</b>   |
| 31    | <b>21.1</b>    | 24    | 24    | 13    | 24    | <b>21.4</b>    |
| 949   | <b>978.6</b>   | 854   | 869   | 903   | 432   | <b>764.6</b>   |
| 336   | <b>465.9</b>   | 616   | 730   | 642   | 221   | <b>552.3</b>   |
| 1280  | <b>1349.6</b>  | 1176  | 1128  | 1529  | 2313  | <b>1536.5</b>  |
| 0     | <b>70.3</b>    | 0     | 0     | 423   | 316   | <b>184.8</b>   |
| 0     | <b>13.3</b>    | 106   | 0     | 0     | 0     | <b>26.4</b>    |
| 1295  | <b>1340.6</b>  | 1046  | 782   | 1193  | 1235  | <b>1064.2</b>  |
| 30    | <b>51.8</b>    | 0     | 0     | 48    | 28    | <b>19.0</b>    |
| 301   | <b>158.1</b>   | 243   | 0     | 328   | 0     | <b>142.9</b>   |
| 50    | <b>161.9</b>   | 269   | 282   | 301   | 164   | <b>254.0</b>   |
| 374   | <b>335.1</b>   | 383   | 396   | 573   | 274   | <b>406.5</b>   |
| 1778  | <b>2115.0</b>  | 2221  | 2375  | 2221  | 2181  | <b>2249.7</b>  |
| 161   | <b>191.4</b>   | 195   | 192   | 224   | 22    | <b>158.4</b>   |
| 97    | <b>165.1</b>   | 97    | 48    | 107   | 274   | <b>131.7</b>   |
| 57    | <b>48.8</b>    | 42    | 27    | 57    | 35    | <b>40.4</b>    |
| 154   | <b>128.2</b>   | 119   | 136   | 219   | 0     | <b>118.6</b>   |
| 773   | <b>798.2</b>   | 1122  | 1048  | 812   | 840   | <b>955.5</b>   |
| 31    | <b>69.8</b>    | 66    | 192   | 108   | 37    | <b>100.6</b>   |
| 136   | <b>27.1</b>    | 0     | 0     | 0     | 0     | <b>0.0</b>     |
| 0     | <b>129.8</b>   | 0     | 0     | 0     | 329   | <b>82.1</b>    |
| 1033  | <b>1120.5</b>  | 745   | 2052  | 81    | 247   | <b>781.4</b>   |
| 1756  | <b>1474.0</b>  | 828   | 1123  | 1435  | 791   | <b>1044.4</b>  |
| 511   | <b>444.7</b>   | 494   | 213   | 699   | 468   | <b>468.6</b>   |
| 455   | <b>406.2</b>   | 1041  | 0     | 1138  | 397   | <b>644.2</b>   |
| 230   | <b>206.5</b>   | 320   | 283   | 231   | 310   | <b>286.2</b>   |
| 0     | <b>380.0</b>   | 818   | 344   | 1028  | 950   | <b>784.8</b>   |
| 0     | <b>137.5</b>   | 216   | 183   | 423   | 0     | <b>205.6</b>   |
| 3149  | <b>3153.6</b>  | 3643  | 4231  | 4338  | 2757  | <b>3742.3</b>  |
| 172   | <b>210.3</b>   | 241   | 248   | 315   | 109   | <b>228.1</b>   |
| 74    | <b>77.9</b>    | 85    | 79    | 84    | 93    | <b>85.3</b>    |
| 199   | <b>249.0</b>   | 278   | 238   | 342   | 230   | <b>272.1</b>   |
| 0     | <b>0.0</b>     | 58    | 0     | 50    | 0     | <b>27.1</b>    |
| 399   | <b>85.7</b>    | 288   | 506   | 686   | 585   | <b>516.6</b>   |
| 462   | <b>477.1</b>   | 387   | 313   | 663   | 482   | <b>461.2</b>   |
| 0     | <b>22.3</b>    | 0     | 0     | 730   | 120   | <b>212.4</b>   |
| 582   | <b>696.4</b>   | 577   | 414   | 564   | 1060  | <b>653.6</b>   |
| 499   | <b>740.1</b>   | 643   | 660   | 705   | 792   | <b>700.0</b>   |
| 0     | <b>22.7</b>    | 18    | 26    | 79    | 17    | <b>35.1</b>    |
| 286   | <b>305.9</b>   | 263   | 212   | 131   | 245   | <b>213.1</b>   |
| 0     | <b>0.0</b>     | 34    | 0     | 37    | 0     | <b>17.6</b>    |
| 841   | <b>879.3</b>   | 1026  | 1045  | 1330  | 630   | <b>1007.9</b>  |
| 109   | <b>161.0</b>   | 159   | 89    | 104   | 215   | <b>141.5</b>   |

|       |                |       |       |       |       |                |
|-------|----------------|-------|-------|-------|-------|----------------|
| 113   | <b>153.3</b>   | 158   | 77    | 188   | 297   | <b>180.1</b>   |
| 45    | <b>71.1</b>    | 51    | 148   | 77    | 67    | <b>85.7</b>    |
| 2021  | <b>2130.3</b>  | 2375  | 2353  | 2473  | 1899  | <b>2275.2</b>  |
| 80    | <b>82.3</b>    | 115   | 71    | 85    | 44    | <b>79.0</b>    |
| 51    | <b>48.4</b>    | 73    | 32    | 67    | 85    | <b>64.3</b>    |
| 0     | <b>7.1</b>     | 0     | 36    | 0     | 0     | <b>8.9</b>     |
| 0     | <b>9.6</b>     | 0     | 43    | 51    | 0     | <b>23.6</b>    |
| 5230  | <b>3429.8</b>  | 3184  | 3949  | 3853  | 338   | <b>2831.0</b>  |
| 3069  | <b>2425.1</b>  | 1450  | 1020  | 1943  | 2363  | <b>1693.8</b>  |
| 1430  | <b>1205.6</b>  | 1028  | 365   | 1113  | 1408  | <b>978.7</b>   |
| 106   | <b>34.3</b>    | 87    | 0     | 78    | 84    | <b>62.1</b>    |
| 25236 | <b>14805.1</b> | 15495 | 17030 | 17387 | 8629  | <b>14635.5</b> |
| 384   | <b>248.8</b>   | 195   | 82    | 262   | 162   | <b>175.1</b>   |
| 13735 | <b>42725.1</b> | -3    | -3    | -3    | 39528 | <b>9879.8</b>  |
| 454   | <b>251.1</b>   | 1636  | 0     | 1147  | 612   | <b>848.7</b>   |
| 943   | <b>762.3</b>   | 532   | 248   | 702   | 726   | <b>552.2</b>   |
| 203   | <b>149.6</b>   | 73    | 58    | 76    | 164   | <b>92.8</b>    |
| 62    | <b>51.0</b>    | 49    | 0     | 155   | 78    | <b>70.3</b>    |
| 116   | <b>75.7</b>    | 0     | 0     | 33    | 27    | <b>15.1</b>    |
| 141   | <b>128.5</b>   | 130   | 0     | 84    | 257   | <b>117.6</b>   |
| 528   | <b>796.2</b>   | 627   | 291   | 429   | 1387  | <b>683.4</b>   |
| 268   | <b>183.4</b>   | 278   | 175   | 214   | 0     | <b>166.7</b>   |
| 36    | <b>115.1</b>   | 0     | 0     | 21    | 0     | <b>5.2</b>     |
| 1709  | <b>2106.8</b>  | 987   | 1221  | 2111  | 765   | <b>1270.8</b>  |
| 357   | <b>506.8</b>   | 617   | 392   | 458   | 158   | <b>406.2</b>   |
| 571   | <b>571.4</b>   | 672   | 557   | 754   | 0     | <b>495.8</b>   |
| 192   | <b>147.3</b>   | 126   | 54    | 103   | 82    | <b>91.4</b>    |
| 6006  | <b>4602.5</b>  | 1603  | 1856  | 3458  | 3690  | <b>2651.6</b>  |
| 181   | <b>211.7</b>   | 160   | 0     | 139   | 69    | <b>92.1</b>    |
| 2566  | <b>3145.3</b>  | 3325  | 2142  | 2961  | 2961  | <b>2847.4</b>  |
| 48341 | <b>30982.0</b> | 47213 | 38271 | 49058 | 43156 | <b>44424.6</b> |
| 138   | <b>80.2</b>    | 81    | 12    | 79    | 184   | <b>89.2</b>    |
| 118   | <b>78.0</b>    | 119   | 45    | 30    | 31    | <b>56.3</b>    |
| 176   | <b>102.0</b>   | 137   | 38    | 124   | 13    | <b>77.9</b>    |
| 40    | <b>84.1</b>    | 56    | 106   | 34    | 17    | <b>53.2</b>    |
| 0     | <b>12.0</b>    | 0     | 0     | 28    | 0     | <b>7.0</b>     |
| 0     | <b>382.6</b>   | 0     | 0     | 0     | 1980  | <b>495.0</b>   |
| 0     | <b>18.4</b>    | 132   | 0     | 68    | 83    | <b>71.0</b>    |
| 528   | <b>379.7</b>   | 608   | 618   | 25    | 158   | <b>352.4</b>   |
| 12    | <b>14.7</b>    | 28    | 0     | 112   | 48    | <b>47.3</b>    |
| 1394  | <b>600.6</b>   | 1437  | 626   | 1680  | 0     | <b>935.8</b>   |
| 4112  | <b>4069.1</b>  | 3499  | 1839  | 4254  | 3474  | <b>3266.5</b>  |
| 1037  | <b>1257.1</b>  | 1092  | 860   | 984   | 1103  | <b>1009.6</b>  |
| 0     | <b>430.5</b>   | 0     | 0     | 80    | 0     | <b>20.0</b>    |
| 980   | <b>784.0</b>   | 1036  | 840   | 857   | 506   | <b>810.0</b>   |
| 2334  | <b>2176.5</b>  | 2636  | 2053  | 2398  | 1733  | <b>2204.9</b>  |
| 915   | <b>864.5</b>   | 774   | 381   | 1195  | 0     | <b>587.2</b>   |
| 397   | <b>345.9</b>   | 331   | 21    | 298   | 1171  | <b>455.1</b>   |
| 0     | <b>84.6</b>    | 278   | 0     | 180   | 189   | <b>161.7</b>   |
| 241   | <b>338.7</b>   | 437   | 0     | 259   | 89    | <b>196.2</b>   |
| 190   | <b>153.7</b>   | 260   | 137   | 328   | 115   | <b>209.9</b>   |
| 157   | <b>50.2</b>    | 82    | 87    | 146   | 0     | <b>78.7</b>    |

|       |                |       |       |       |       |                |
|-------|----------------|-------|-------|-------|-------|----------------|
| 198   | <b>187.0</b>   | 210   | 0     | 231   | 188   | <b>157.4</b>   |
| 604   | <b>479.2</b>   | 592   | 490   | 667   | 0     | <b>437.2</b>   |
| 508   | <b>868.7</b>   | 423   | 0     | 672   | 478   | <b>393.4</b>   |
| 322   | <b>138.1</b>   | 286   | 0     | 516   | 18    | <b>205.2</b>   |
| 0     | <b>64.2</b>    | 82    | 0     | 0     | 0     | <b>20.5</b>    |
| 892   | <b>599.8</b>   | 554   | 0     | 741   | 991   | <b>571.6</b>   |
| 3272  | <b>3137.1</b>  | 2539  | 0     | 2610  | 2590  | <b>1934.8</b>  |
| 2690  | <b>2825.5</b>  | 1918  | 0     | 2850  | 2452  | <b>1804.9</b>  |
| 0     | <b>120.4</b>   | 0     | 0     | 114   | 363   | <b>119.4</b>   |
| 543   | <b>1888.8</b>  | 1006  | 1167  | 1212  | 966   | <b>1087.5</b>  |
| 1112  | <b>1841.3</b>  | 2309  | 845   | 854   | 1114  | <b>1280.3</b>  |
| 383   | <b>284.3</b>   | 378   | 232   | 300   | 239   | <b>287.2</b>   |
| 2046  | <b>2231.7</b>  | 2147  | 2202  | 2535  | 1288  | <b>2043.1</b>  |
| 132   | <b>157.4</b>   | 125   | 200   | 209   | 81    | <b>153.8</b>   |
| 11    | <b>45.2</b>    | 0     | 22    | 19    | 75    | <b>29.1</b>    |
| 487   | <b>611.8</b>   | 441   | 290   | 462   | 527   | <b>430.1</b>   |
| 135   | <b>141.5</b>   | 101   | 27    | 82    | 34    | <b>60.9</b>    |
| 140   | <b>81.1</b>    | 117   | 0     | 126   | 0     | <b>60.8</b>    |
| 6604  | <b>8702.3</b>  | 8745  | 8791  | 9680  | 4429  | <b>7911.1</b>  |
| 95    | <b>127.6</b>   | 23    | 67    | 273   | 45    | <b>102.0</b>   |
| 7683  | <b>7111.8</b>  | 12266 | 0     | 6376  | 11461 | <b>7525.8</b>  |
| 489   | <b>233.1</b>   | 660   | 0     | 828   | 83    | <b>392.8</b>   |
| 3767  | <b>2225.1</b>  | 3226  | 12698 | 4172  | 3593  | <b>5922.3</b>  |
| 42    | <b>105.0</b>   | 107   | 0     | 195   | 100   | <b>100.5</b>   |
| 175   | <b>155.4</b>   | 0     | 131   | 213   | 0     | <b>86.0</b>    |
| 1139  | <b>1192.8</b>  | 1195  | 1167  | 1461  | 986   | <b>1202.2</b>  |
| 5139  | <b>5365.8</b>  | 4932  | 3942  | 5678  | 4735  | <b>4821.7</b>  |
| 2306  | <b>2414.6</b>  | 2190  | 2507  | 2791  | 2211  | <b>2425.0</b>  |
| 159   | <b>49.2</b>    | 0     | 0     | 341   | 0     | <b>85.2</b>    |
| 16987 | <b>20167.1</b> | 15203 | 16868 | 19125 | 12456 | <b>15913.1</b> |
| 1627  | <b>984.1</b>   | 1393  | 0     | 1595  | 169   | <b>789.1</b>   |
| 0     | <b>0.0</b>     | 0     | 1462  | 0     | 68    | <b>382.3</b>   |
| 1953  | <b>1620.9</b>  | 2150  | 1611  | 2523  | 254   | <b>1634.4</b>  |
| 2122  | <b>1317.4</b>  | 2079  | 1007  | 2712  | 1379  | <b>1794.1</b>  |
| 0     | <b>678.3</b>   | 58    | 0     | 0     | 178   | <b>59.0</b>    |
| 4455  | <b>2606.2</b>  | 5820  | 0     | 6589  | 0     | <b>3102.3</b>  |
| 0     | <b>293.7</b>   | 0     | 6089  | 5439  | 0     | <b>2882.0</b>  |
| 0     | <b>1661.4</b>  | 0     | 4990  | 0     | 0     | <b>1247.4</b>  |
| 0     | <b>784.8</b>   | 0     | 0     | 1074  | 1252  | <b>581.4</b>   |
| 0     | <b>632.4</b>   | 0     | 0     | 2805  | 0     | <b>701.1</b>   |
| 592   | <b>8019.5</b>  | 3083  | 2859  | 4067  | 19852 | <b>7465.0</b>  |
| 0     | <b>1100.6</b>  | 0     | 0     | 3087  | 0     | <b>771.8</b>   |
| 1852  | <b>690.5</b>   | 0     | 0     | 579   | 0     | <b>144.7</b>   |
| 2741  | <b>3434.2</b>  | 6507  | 0     | 3750  | 13902 | <b>6039.8</b>  |
| 461   | <b>486.0</b>   | 667   | 867   | 778   | 153   | <b>616.2</b>   |
| 796   | <b>877.7</b>   | 1011  | 1750  | 0     | 666   | <b>856.8</b>   |
| 0     | <b>669.0</b>   | 0     | 0     | 2534  | 804   | <b>834.7</b>   |
| 1637  | <b>1606.9</b>  | 1867  | 2053  | 1935  | 541   | <b>1599.0</b>  |
| 1380  | <b>801.1</b>   | 0     | 0     | 1629  | 0     | <b>407.3</b>   |
| 1217  | <b>656.7</b>   | 1559  | 0     | 1303  | 599   | <b>865.1</b>   |
| 6823  | <b>6932.2</b>  | 10256 | 4645  | 10970 | 4925  | <b>7699.0</b>  |
| 0     | <b>0.0</b>     | 0     | 7104  | 0     | 0     | <b>1776.0</b>  |

|       |         |       |      |       |      |         |
|-------|---------|-------|------|-------|------|---------|
| 0     | 135.4   | 785   | 238  | 601   | 241  | 466.1   |
| 88    | 284.9   | 555   | 0    | 772   | 540  | 467.0   |
| 1900  | 1934.6  | 1734  | 1805 | 2341  | 338  | 1554.8  |
| 340   | 339.9   | 372   | 369  | 463   | 316  | 380.0   |
| 3086  | 2855.7  | 3488  | 2983 | 2790  | 1739 | 2749.9  |
| 247   | 244.8   | 467   | 64   | 350   | 425  | 326.4   |
| 77    | 116.0   | 135   | 116  | 165   | 107  | 130.7   |
| 8303  | 8044.0  | 9088  | 6952 | 11825 | 9772 | 9409.0  |
| 0     | 29.9    | 50    | 12   | 37    | 43   | 35.4    |
| 3706  | 3956.3  | 4641  | 4169 | 6831  | 3501 | 4785.6  |
| 0     | 0.0     | 0     | 0    | 0     | 0    | 0.0     |
| 0     | 3.4     | 197   | 27   | 22    | 0    | 61.7    |
| 0     | 0.0     | 0     | 0    | 0     | 0    | 0.0     |
| 15382 | 13469.4 | 17377 | 4672 | 18745 | 4696 | 11372.3 |
| 9606  | 7564.7  | 10938 | 0    | 7108  | 0    | 4511.4  |
| 207   | 76.2    | 54    | 0    | 12    | 0    | 16.5    |
| 2846  | 865.3   | 0     | 0    | 0     | 0    | 0.0     |
| 1041  | 1426.7  | 1431  | 660  | 660   | 0    | 688.0   |
| 393   | 388.1   | 0     | 0    | 612   | 0    | 153.0   |
| 210   | 466.2   | 463   | 0    | 446   | 67   | 244.1   |
| 0     | 17.9    | 0     | 0    | 0     | 27   | 6.8     |
| 78    | 34.0    | 82    | 0    | 0     | 0    | 20.5    |
| 353   | 290.0   | 0     | 291  | 268   | 0    | 139.6   |
| 151   | 257.3   | 154   | 24   | 194   | 0    | 93.1    |
| 0     | 34.4    | 0     | 129  | 0     | 0    | 32.3    |
| 476   | 112.4   | 0     | 0    | 1194  | 0    | 298.5   |
| 0     | 65.5    | 0     | 0    | 35    | 7    | 10.6    |
| 89    | 30.8    | 5     | 0    | 37    | 6    | 11.9    |
| 58    | 151.9   | 40    | 53   | 45    | 0    | 34.4    |
| 0     | 2.3     | 0     | 0    | 103   | 0    | 25.9    |
| 427   | 402.4   | 472   | 425  | 533   | 423  | 463.0   |
| 235   | 292.3   | 210   | 0    | 136   | 10   | 89.1    |
| 0     | 209.9   | 0     | 308  | 218   | 0    | 131.5   |
| 1089  | 673.4   | 1185  | 79   | 359   | 0    | 405.8   |
| 2620  | 1362.6  | 599   | 885  | 271   | 0    | 438.7   |
| 1067  | 1339.1  | 2426  | 2782 | 1673  | 378  | 1814.5  |
| 3218  | 1730.3  | 2624  | 1727 | 2464  | 1644 | 2114.8  |
| 0     | 61.6    | 84    | 0    | 0     | 30   | 28.5    |
| 421   | 384.0   | 402   | 389  | 300   | 145  | 309.0   |
| 942   | 839.6   | 1579  | 615  | 870   | 1636 | 1174.8  |
| 2244  | 3137.6  | 2591  | 2404 | 3166  | 3223 | 2845.9  |
| 0     | 148.8   | 2471  | 848  | 964   | 0    | 1070.8  |
| 179   | 90.3    | 152   | 169  | 158   | 0    | 119.8   |
| 0     | 160.4   | 0     | 72   | 0     | 0    | 18.1    |
| 1571  | 1696.0  | 7266  | 0    | 0     | 224  | 1872.6  |
| 1296  | 1289.3  | 0     | 3740 | 11418 | 93   | 3812.6  |
| 2373  | 1597.1  | 0     | 0    | 0     | 3290 | 822.4   |
| 0     | 0.0     | 0     | 0    | 0     | 0    | 0.0     |
| 0     | 3121.2  | 0     | 3663 | 3493  | 0    | 1788.9  |
| 0     | 394.9   | 0     | 3788 | 2876  | 0    | 1665.9  |
| 0     | 126.6   | 232   | 0    | 213   | 40   | 121.3   |
| 0     | 424.6   | 0     | 0    | 657   | 0    | 164.3   |



|          |   |            |          |          |          |          |             |            |
|----------|---|------------|----------|----------|----------|----------|-------------|------------|
|          | 0 | <b>0.0</b> | 0        | 0        | 248      | 0        | <b>62.0</b> |            |
|          | 0 | <b>0.0</b> | 0        | 0        | 0        | 0        | <b>0.0</b>  |            |
|          | 0 | <b>0.0</b> | 0        | 0        | 0        | 0        | <b>0.0</b>  |            |
|          | 0 | <b>0.0</b> | 0        | 0        | 0        | 0        | <b>0.0</b>  |            |
|          | 0 | <b>0.0</b> | 0        | 0        | 0        | 0        | <b>0.0</b>  |            |
|          | 0 | <b>0.0</b> | 0        | 0        | 0        | 0        | <b>0.0</b>  |            |
|          | 0 | <b>0.0</b> | 0        | 0        | 0        | 0        | <b>0.0</b>  |            |
|          | 0 | <b>0.0</b> | 0        | 0        | 0        | 0        | <b>0.0</b>  |            |
|          | 0 | <b>0.0</b> | 0        | 0        | 0        | 0        | <b>0.0</b>  |            |
|          | 0 | <b>0.0</b> | 0        | 0        | 0        | 0        | <b>0.0</b>  |            |
|          | 0 | <b>0.0</b> | 0        | 0        | 0        | 0        | <b>0.0</b>  |            |
|          | 0 | <b>0.0</b> | 0        | 0        | 0        | 0        | <b>0.0</b>  |            |
|          | 0 | <b>0.0</b> | 0        | 0        | 0        | 0        | <b>0.0</b>  |            |
|          | 0 | <b>0.0</b> | 0        | 0        | 0        | 0        | <b>0.0</b>  |            |
|          | 0 | <b>0.0</b> | 0        | 0        | 0        | 0        | <b>0.0</b>  |            |
|          | 0 | <b>0.0</b> | 0        | 0        | 0        | 0        | <b>0.0</b>  |            |
|          | 0 | <b>0.0</b> | 0        | 0        | 0        | 0        | <b>0.0</b>  |            |
|          | 0 | <b>0.0</b> | 0        | 0        | 0        | 0        | <b>0.0</b>  |            |
|          | 0 | <b>0.0</b> | 0        | 0        | 0        | 0        | <b>0.0</b>  |            |
| quantity | 0 | <b>0.0</b> | quantity | quantity | quantity | quantity | 0           | <b>0.0</b> |

| pvalue 4v12 | FC 4v12 | pvalue 4v24 | FC 4v24 | pvalue 12v24 | FC 12v24 | pvalue 12v34 | FC 12v34 |
|-------------|---------|-------------|---------|--------------|----------|--------------|----------|
| 0.78        | 1.1     | 0.91        | 1.0     | 0.67         | 0.9      | 0.94         | 1.0      |
| 0.16        | 0.4     | 0.15        | 0.4     | 0.99         | 1.0      | 0.14         | 0.5      |
| 0.63        | 0.9     | 0.48        | 1.2     | 0.19         | 1.4      | 0.16         | 1.4      |
| 0.09        | 0.3     | 0.09        | 0.4     | 0.85         | 1.1      | 0.67         | 0.8      |
| 0.29        | 1.7     | 0.03        | 5.0     | 0.04         | 2.9      | 0.06         | 2.4      |
| 0.24        | 0.6     | 0.95        | 1.0     | 0.09         | 1.7      | 0.01         | 2.7      |
| 0.04        | 0.3     | 0.04        | 0.3     | 0.99         | 1.0      | 0.96         | 1.0      |
| 0.06        | 0.2     | 0.05        | 0.1     | 0.64         | 0.8      | 0.04         | 0.0      |
| 0.91        | 1.0     | 0.09        | 1.9     | 0.04         | 1.8      | 0.02         | 2.1      |
| 0.41        | #DIV/0! | 0.22        | #DIV/0! | 0.28         | 5.0      | 0.29         | 42.7     |
| 0.85        | 1.2     | 0.83        | 0.8     | 0.62         | 0.7      | 0.26         | 0.4      |
| 0.41        | #DIV/0! | #DIV/0!     | #DIV/0! | 0.35         | 0.0      | 0.41         | 0.0      |
| 0.25        | 1.7     | 0.45        | 1.9     | 0.82         | 1.1      | 0.01         | 0.2      |
| 0.32        | 1.6     | 0.94        | 1.1     | 0.32         | 0.7      | 0.00         | 0.2      |
| 0.33        | 0.8     | 0.65        | 0.9     | 0.80         | 1.1      | 0.30         | 1.2      |
| 0.11        | 0.7     | 0.30        | 0.9     | 0.35         | 1.2      | 0.15         | 1.3      |
| 0.53        | 0.7     | 0.41        | 0.6     | 0.80         | 0.9      | 0.05         | 0.1      |
| 0.68        | 0.9     | 0.92        | 1.1     | 0.59         | 1.2      | 0.78         | 1.1      |
| 0.51        | 0.8     | 0.16        | 0.4     | 0.13         | 0.6      | 0.05         | 0.4      |
| 0.20        | 0.5     | 0.86        | 1.1     | 0.03         | 2.3      | 0.51         | 1.4      |
| 0.07        | 0.4     | 0.04        | 1.7     | 0.00         | 4.4      | 0.00         | 8.1      |
| 0.95        | 1.0     | 0.32        | 0.5     | 0.30         | 0.5      | 0.43         | 0.6      |
| 0.23        | #DIV/0! | 0.16        | #DIV/0! | 0.62         | 1.6      | 0.93         | 1.1      |
| 0.76        | 1.2     | 0.42        | 0.5     | 0.12         | 0.4      | 0.67         | 0.7      |
| 0.20        | #DIV/0! | 0.28        | #DIV/0! | 0.48         | 0.5      | 0.25         | 2.5      |
| 0.48        | 1.5     | 0.04        | 3.2     | 0.09         | 2.1      | 0.83         | 1.1      |
| 0.42        | 0.7     | 0.39        | 0.6     | 0.78         | 0.9      | 0.59         | 0.8      |
| 0.01        | 0.3     | 0.18        | 0.5     | 0.37         | 1.9      | 0.34         | 1.8      |
| 0.21        | 0.6     | 0.52        | 0.8     | 0.36         | 1.3      | 0.97         | 1.0      |
| 0.82        | 1.0     | 0.48        | 1.1     | 0.63         | 1.1      | 0.33         | 1.1      |
| 0.65        | 1.2     | 0.57        | 1.2     | 0.86         | 1.1      | 0.95         | 1.0      |
| 0.83        | 1.1     | 0.42        | 1.7     | 0.43         | 1.6      | 0.42         | 0.7      |
| 0.03        | 0.4     | 0.91        | 1.1     | 0.08         | 3.0      | 0.46         | 1.9      |
| 0.03        | 0.2     | 0.86        | 1.1     | 0.15         | 4.9      | 0.03         | 6.2      |
| 0.64        | 1.5     | 0.57        | 1.5     | 0.98         | 1.0      | 0.38         | 2.3      |
| 0.72        | 1.8     | 0.83        | 1.3     | 0.80         | 0.7      | 0.41         | 0.0      |
| 0.91        | 0.9     | 0.26        | 2.1     | 0.16         | 2.2      | 0.35         | 0.5      |
| 0.64        | 1.3     | 0.02        | 3.3     | 0.04         | 2.5      | 0.22         | 2.0      |
| 0.70        | 0.9     | 0.70        | 1.1     | 0.38         | 1.2      | 0.34         | 0.8      |
| 0.15        | 111.1   | 0.21        | 75.2    | 0.65         | 0.7      | 0.65         | 1.5      |
| 0.37        | 0.6     | 0.86        | 0.9     | 0.52         | 1.5      | 0.21         | 2.1      |
| 0.51        | 0.5     | 0.16        | 0.3     | 0.68         | 0.5      | 0.69         | 0.5      |
| 0.46        | 0.7     | 0.81        | 0.9     | 0.48         | 1.4      | 0.16         | 0.2      |
| 0.92        | 1.1     | 1.00        | 1.0     | 0.91         | 0.9      | 0.92         | 0.9      |
| 0.31        | 0.4     | 0.39        | 1.8     | 0.05         | 4.8      | 0.20         | 5.1      |
| 0.77        | 0.8     | 0.51        | 1.6     | 0.23         | 2.1      | 0.73         | 1.3      |
| 0.05        | 0.4     | 0.73        | 0.9     | 0.21         | 2.0      | 0.15         | 2.7      |
| 0.94        | 0.9     | 0.67        | 0.7     | 0.68         | 0.7      | 0.64         | 1.4      |
| 0.78        | 1.1     | 0.83        | 0.9     | 0.63         | 0.8      | 0.01         | 0.1      |
| 0.23        | 0.6     | 0.66        | 0.8     | 0.56         | 1.4      | 0.85         | 1.1      |
| 0.25        | 0.4     | 0.23        | 2.2     | 0.04         | 5.9      | 0.15         | 9.0      |

|      |         |         |         |      |     |       |      |
|------|---------|---------|---------|------|-----|-------|------|
| 0.43 | 1.6     | 0.02    | 2.1     | 0.35 | 1.4 | 0.36  | 1.8  |
| 0.07 | 0.4     | 0.28    | 0.6     | 0.35 | 1.7 | 0.54  | 1.5  |
| 0.02 | 0.4     | 0.98    | 1.0     | 0.02 | 2.3 | 0.13  | 1.6  |
| 0.01 | 0.6     | 0.84    | 0.9     | 0.20 | 1.6 | 0.32  | 1.5  |
| 0.00 | 0.3     | 0.73    | 0.9     | 0.07 | 3.3 | 0.18  | 1.8  |
| 0.42 | 0.6     | 0.41    | 2.9     | 0.27 | 4.7 | 0.10  | 3.2  |
| 0.22 | 0.4     | 0.66    | 0.8     | 0.32 | 1.7 | 0.15  | 0.4  |
| 0.39 | 0.7     | 0.75    | 1.1     | 0.23 | 1.5 | 0.04  | 0.3  |
| 0.42 | 0.7     | 0.23    | 2.3     | 0.12 | 3.2 | 0.23  | 3.8  |
| 0.36 | 0.6     | 0.57    | 0.6     | 0.87 | 1.1 | 0.38  | 1.6  |
| 0.30 | 2.8     | 0.59    | 2.0     | 0.67 | 0.7 | 0.55  | 1.6  |
| 0.10 | 3.1     | 0.10    | 7.7     | 0.18 | 2.5 | 0.27  | 3.1  |
| 0.81 | 1.2     | 0.47    | 2.5     | 0.48 | 2.0 | 0.13  | 3.9  |
| 0.30 | 1.3     | 0.00    | 2.5     | 0.00 | 2.0 | 0.00  | 2.1  |
| 0.17 | 11.6    | 0.18    | 7.5     | 0.58 | 0.6 | 0.23  | 0.2  |
| 0.07 | 1.9     | 0.02    | 3.2     | 0.10 | 1.7 | 0.58  | 1.2  |
| 0.39 | 1.5     | 0.02    | 4.5     | 0.02 | 3.0 | 0.02  | 2.4  |
| 0.11 | 1.6     | 0.09    | 1.9     | 0.51 | 1.2 | 0.01  | 0.4  |
| 0.04 | 0.1     | 0.06    | 0.2     | 0.18 | 1.9 | 0.96  | 1.0  |
| 0.10 | #DIV/0! | 0.41    | #DIV/0! | 0.08 | 0.1 | 0.10  | 0.0  |
| 0.33 | #DIV/0! | 0.05    | #DIV/0! | 0.07 | 6.5 | 0.02  | 10.2 |
| 0.75 | 0.8     | 0.04    | 0.0     | 0.16 | 0.0 | 0.27  | 0.1  |
| 0.24 | #DIV/0! | #DIV/0! | #DIV/0! | 0.18 | 0.0 | 0.42  | 0.3  |
| 0.43 | 2.1     | 0.18    | 3.8     | 0.38 | 1.8 | 0.71  | 1.3  |
| 0.10 | #DIV/0! | 0.01    | #DIV/0! | 0.05 | 3.0 | 0.00  | 8.5  |
| 0.98 | 1.0     | 0.07    | 1.4     | 0.05 | 1.4 | 0.001 | 1.5  |
| 0.52 | 0.4     | 0.41    | 0.2     | 0.65 | 0.6 | 0.29  | 0.0  |
| 0.03 | 17.9    | 0.13    | 33.1    | 0.41 | 1.8 | 0.58  | 1.4  |
| 0.55 | 1.7     | 0.03    | 3.3     | 0.15 | 2.0 | 0.79  | 1.2  |
| 0.65 | 0.7     | 0.49    | 0.6     | 0.53 | 0.8 | 0.01  | 0.1  |
| 0.09 | 3.8     | 0.13    | 4.9     | 0.63 | 1.3 | 0.58  | 0.8  |
| 0.26 | #DIV/0! | 0.25    | #DIV/0! | 0.38 | 3.1 | 0.26  | 0.0  |
| 0.41 | #DIV/0! | #DIV/0! | #DIV/0! | 0.35 | 0.0 | 0.43  | 4.4  |
| 0.79 | 1.2     | 0.18    | 2.4     | 0.18 | 2.0 | 0.47  | 1.4  |
| 0.45 | 0.5     | 0.09    | 0.0     | 0.12 | 0.0 | 0.19  | 0.0  |
| 0.02 | 0.2     | 0.03    | 0.3     | 0.67 | 1.2 | 0.55  | 0.8  |
| 0.17 | 0.6     | 0.68    | 0.9     | 0.20 | 1.5 | 0.68  | 1.2  |
| 0.45 | 1.4     | 0.13    | 1.8     | 0.50 | 1.3 | 0.96  | 1.0  |
| 0.79 | 1.4     | 0.62    | 1.7     | 0.81 | 1.2 | 0.21  | 2.4  |
| 0.44 | 1.2     | 0.23    | 1.3     | 0.42 | 1.1 | 0.23  | 1.1  |
| 0.47 | 7.5     | 0.32    | 8.5     | 0.92 | 1.1 | 0.63  | 1.7  |
| 0.70 | 0.9     | 0.00    | 2.1     | 0.00 | 2.3 | 0.00  | 3.2  |
| 0.20 | 0.6     | 0.96    | 1.0     | 0.03 | 1.8 | 0.00  | 2.6  |
| 0.42 | 1.6     | 0.03    | 3.4     | 0.07 | 2.2 | 0.00  | 3.1  |
| 0.20 | 39.4    | 0.27    | 4.5     | 0.19 | 0.1 | 0.78  | 1.3  |
| 0.27 | 0.5     | 0.05    | 0.1     | 0.08 | 0.1 | 0.53  | 1.6  |
| 0.65 | 0.6     | 0.96    | 1.0     | 0.73 | 1.5 | 0.46  | 0.1  |
| 0.39 | 7.3     | 0.09    | 0.0     | 0.26 | 0.0 | 0.40  | 0.2  |
| 0.24 | 0.5     | 0.66    | 1.2     | 0.05 | 2.4 | 0.44  | 0.6  |
| 0.29 | 0.3     | 0.12    | 0.0     | 0.15 | 0.0 | 1.00  | 1.0  |
| 0.64 | 1.3     | 0.89    | 1.1     | 0.68 | 0.8 | 0.16  | 0.4  |
| 0.27 | 1.9     | 0.01    | 6.0     | 0.01 | 3.2 | 0.00  | 4.0  |

|      |         |      |         |      |      |      |      |
|------|---------|------|---------|------|------|------|------|
| 0.20 | 1.6     | 0.14 | 3.3     | 0.18 | 2.1  | 0.06 | 4.0  |
| 0.48 | 1.8     | 0.95 | 1.1     | 0.52 | 0.6  | 0.63 | 0.7  |
| 0.04 | 2.6     | 0.25 | 2.2     | 0.62 | 0.8  | 0.33 | 0.7  |
| 0.84 | 0.7     | 0.29 | 0.0     | 0.31 | 0.0  | 0.38 | 0.0  |
| 0.00 | 2.9     | 0.18 | 1.7     | 0.02 | 0.6  | 0.01 | 0.3  |
| 0.18 | 2.2     | 0.46 | 1.7     | 0.57 | 0.8  | 0.68 | 0.8  |
| 0.64 | 1.3     | 0.38 | 2.3     | 0.49 | 1.7  | 0.88 | 0.9  |
| 0.09 | 1.6     | 0.06 | 2.3     | 0.21 | 1.4  | 0.19 | 1.3  |
| 0.43 | 0.5     | 0.11 | 3.2     | 0.05 | 5.8  | 0.44 | 3.9  |
| 0.52 | 0.8     | 0.38 | 0.6     | 0.53 | 0.7  | 0.30 | 1.9  |
| 0.05 | 0.3     | 0.97 | 1.0     | 0.31 | 3.0  | 0.27 | 3.6  |
| 0.27 | 2.6     | 0.45 | 1.9     | 0.60 | 0.7  | 0.76 | 0.8  |
| 0.52 | 1.8     | 0.99 | 1.0     | 0.48 | 0.6  | 0.54 | 1.7  |
| 0.39 | 0.8     | 0.02 | 1.8     | 0.00 | 2.4  | 0.95 | 1.0  |
| 0.11 | 0.6     | 0.40 | 0.7     | 0.66 | 1.2  | 0.30 | 1.9  |
| 0.11 | 0.6     | 0.61 | 0.9     | 0.16 | 1.5  | 0.70 | 0.8  |
| 0.76 | 1.4     | 0.62 | 0.5     | 0.37 | 0.3  | 0.32 | 0.2  |
| 0.20 | #DIV/0! | 0.41 | #DIV/0! | 0.28 | 0.2  | 0.58 | 0.5  |
| 0.66 | 0.8     | 0.08 | 0.5     | 0.21 | 0.6  | 0.21 | 0.5  |
| 0.96 | 1.0     | 0.99 | 1.0     | 0.97 | 1.0  | 0.01 | 0.2  |
| 0.40 | 1.3     | 0.82 | 1.1     | 0.40 | 0.8  | 0.42 | 0.8  |
| 0.76 | 0.9     | 0.08 | 0.5     | 0.08 | 0.6  | 0.94 | 1.0  |
| 0.69 | 1.2     | 0.86 | 0.9     | 0.62 | 0.7  | 0.58 | 0.8  |
| 0.24 | #DIV/0! | 0.41 | #DIV/0! | 0.33 | 0.2  | 0.24 | 0.0  |
| 0.95 | 1.0     | 0.95 | 1.0     | 1.00 | 1.0  | 0.52 | 1.4  |
| 0.41 | #DIV/0! | 0.41 | #DIV/0! | 0.51 | 3.6  | 0.47 | 3.6  |
| 0.85 | 1.2     | 0.80 | 0.8     | 0.61 | 0.7  | 0.44 | 0.5  |
| 0.39 | 0.4     | 0.31 | 2.2     | 0.04 | 5.6  | 0.00 | 8.8  |
| 0.23 | 48.7    | 0.09 | 73.5    | 0.60 | 1.5  | 0.53 | 2.1  |
| 0.13 | 0.1     | 0.12 | 0.1     | 0.67 | 0.7  | 0.23 | 7.8  |
| 0.23 | 0.7     | 0.73 | 0.9     | 0.45 | 1.2  | 0.03 | 1.7  |
| 0.06 | 0.1     | 0.73 | 0.8     | 0.02 | 11.5 | 0.07 | 7.7  |
| 0.24 | 0.3     | 0.19 | 0.2     | 0.61 | 0.7  | 1.00 | 1.0  |
| 0.07 | #DIV/0! | 0.41 | #DIV/0! | 0.91 | 0.9  | 0.24 | 0.3  |
| 0.22 | #DIV/0! | 0.41 | #DIV/0! | 0.57 | 2.6  | 0.18 | 11.1 |
| 0.03 | 0.5     | 0.08 | 0.5     | 0.92 | 1.0  | 0.47 | 0.7  |
| 0.43 | 2.1     | 0.34 | 1.8     | 0.76 | 0.8  | 0.33 | 2.7  |
| 0.23 | 0.2     | 0.97 | 1.0     | 0.47 | 4.5  | 0.35 | 4.1  |
| 0.41 | #DIV/0! | 0.41 | #DIV/0! | 0.97 | 0.9  | 0.65 | 0.4  |
| 0.42 | 1.7     | 0.03 | 3.8     | 0.11 | 2.2  | 0.15 | 3.4  |
| 0.27 | 0.6     | 0.58 | 0.8     | 0.50 | 1.3  | 0.16 | 0.3  |
| 0.66 | 1.5     | 0.96 | 1.1     | 0.65 | 0.7  | 0.37 | 1.9  |
| 0.88 | 0.9     | 0.07 | 2.0     | 0.06 | 2.1  | 0.10 | 2.1  |
| 0.01 | 3.9     | 0.27 | 1.8     | 0.03 | 0.5  | 0.10 | 1.5  |
| 0.38 | 0.7     | 0.54 | 0.8     | 0.73 | 1.1  | 0.15 | 1.7  |
| 0.35 | 0.3     | 0.92 | 1.1     | 0.15 | 3.3  | 0.87 | 1.3  |
| 0.35 | 0.6     | 0.07 | 0.2     | 0.20 | 0.3  | 0.05 | 0.0  |
| 0.78 | 0.8     | 0.08 | 0.4     | 0.43 | 0.4  | 0.86 | 0.8  |
| 0.38 | 1.7     | 0.58 | 0.8     | 0.19 | 0.5  | 0.14 | 0.3  |
| 0.67 | 0.8     | 0.01 | 0.0     | 0.02 | 0.0  | 0.03 | 0.0  |
| 0.17 | 1.4     | 0.62 | 1.2     | 0.61 | 0.9  | 0.98 | 1.0  |
| 0.37 | 1.2     | 0.62 | 1.1     | 0.74 | 0.9  | 0.42 | 0.8  |

|      |         |         |         |      |      |      |      |
|------|---------|---------|---------|------|------|------|------|
| 0.87 | 0.8     | 0.94    | 1.0     | 0.90 | 1.1  | 0.55 | 2.0  |
| 0.55 | 3.8     | 0.16    | 5.3     | 0.74 | 1.4  | 0.89 | 0.8  |
| 0.14 | 0.6     | 0.96    | 1.0     | 0.46 | 1.5  | 0.12 | 2.3  |
| 0.10 | #DIV/0! | #DIV/0! | #DIV/0! | 0.07 | 0.0  | 0.54 | 0.5  |
| 0.13 | 0.5     | 0.03    | 0.2     | 0.30 | 0.4  | 0.94 | 1.0  |
| 0.22 | 0.3     | 0.48    | 0.7     | 0.26 | 1.9  | 0.98 | 1.0  |
| 0.41 | #DIV/0! | 0.27    | #DIV/0! | 0.84 | 0.8  | 0.41 | 0.0  |
| 0.86 | 1.1     | 0.57    | 0.6     | 0.36 | 0.6  | 0.08 | 0.1  |
| 0.04 | 13.3    | 0.01    | 10.7    | 0.62 | 0.8  | 0.16 | 0.3  |
| 0.65 | 1.7     | 0.29    | 0.0     | 0.15 | 0.0  | 0.26 | 0.1  |
| 0.35 | 1.5     | 0.42    | 1.1     | 0.43 | 0.8  | 0.80 | 0.9  |
| 0.81 | 0.9     | 0.03    | 0.4     | 0.20 | 0.4  | 0.65 | 1.2  |
| 0.14 | 1.9     | 0.99    | 1.0     | 0.14 | 0.5  | 0.84 | 1.1  |
| 0.41 | 1.2     | 0.06    | 1.5     | 0.18 | 1.3  | 0.18 | 1.5  |
| 0.46 | 1.2     | 0.01    | 0.4     | 0.02 | 0.4  | 0.65 | 0.8  |
| 0.83 | 0.9     | 0.95    | 1.0     | 0.88 | 1.1  | 0.76 | 1.1  |
| 0.86 | 1.1     | 0.21    | 0.7     | 0.50 | 0.6  | 0.51 | 0.5  |
| 0.18 | 2.4     | 0.10    | 7.0     | 0.15 | 2.9  | 0.11 | 2.8  |
| 0.06 | 15.5    | 0.06    | 48.2    | 0.13 | 3.1  | 0.00 | 6.4  |
| 0.00 | 0.0     | 0.31    | 0.5     | 0.26 | 14.3 | 0.02 | 29.6 |
| 0.41 | #DIV/0! | 0.33    | #DIV/0! | 0.91 | 0.9  | 0.41 | 0.0  |
| 0.16 | 3.5     | 0.90    | 1.1     | 0.15 | 0.3  | 0.05 | 0.0  |
| 0.29 | 0.6     | 0.14    | 0.5     | 0.38 | 0.7  | 0.18 | 0.6  |
| 0.85 | 0.9     | 0.60    | 0.8     | 0.71 | 0.9  | 0.80 | 1.1  |
| 0.31 | 0.6     | 0.22    | 0.4     | 0.65 | 0.7  | 0.52 | 1.6  |
| 0.95 | 1.0     | 0.39    | 0.7     | 0.45 | 0.6  | 0.60 | 0.7  |
| 0.03 | 4.5     | 0.01    | 9.8     | 0.03 | 2.2  | 0.11 | 2.3  |
| 0.02 | 2.5     | 0.14    | 2.7     | 0.85 | 1.1  | 0.05 | 1.9  |
| 0.70 | 1.2     | 0.01    | 7.0     | 0.01 | 5.6  | 0.00 | 4.0  |
| 0.61 | 2.8     | 0.49    | 2.4     | 0.90 | 0.9  | 0.60 | 0.4  |
| 0.48 | 2.2     | 0.82    | 1.3     | 0.57 | 0.6  | 0.22 | 0.1  |
| 0.77 | 0.7     | 0.48    | 2.4     | 0.35 | 3.5  | 0.45 | 2.8  |
| 0.08 | 0.4     | 0.02    | 0.2     | 0.05 | 0.6  | 0.12 | 0.6  |
| 0.68 | 0.9     | 0.06    | 1.7     | 0.00 | 1.8  | 0.00 | 2.2  |
| 0.75 | 0.8     | 0.13    | 0.1     | 0.11 | 0.1  | 0.15 | 0.1  |
| 0.94 | 0.9     | 0.02    | 3.7     | 0.01 | 4.0  | 0.04 | 3.1  |
| 0.05 | 0.5     | 0.02    | 0.4     | 0.46 | 0.8  | 0.09 | 0.5  |
| 0.23 | 1.2     | 0.49    | 1.1     | 0.59 | 0.9  | 0.24 | 0.8  |
| 0.02 | 0.4     | 0.01    | 0.3     | 0.32 | 0.7  | 0.02 | 0.3  |
| 0.69 | 1.1     | 0.37    | 1.2     | 0.41 | 1.1  | 0.67 | 0.9  |
| 0.02 | 0.5     | 0.00    | 0.3     | 0.31 | 0.7  | 0.05 | 0.3  |
| 0.19 | 3.4     | 0.18    | 3.9     | 0.82 | 1.1  | 0.36 | 1.5  |
| 0.13 | 1.7     | 0.08    | 1.9     | 0.75 | 1.1  | 0.52 | 1.4  |
| 0.23 | #DIV/0! | 0.36    | #DIV/0! | 0.87 | 0.8  | 0.94 | 1.1  |
| 0.45 | 0.3     | 0.49    | 0.3     | 0.94 | 1.1  | 0.24 | 0.0  |
| 0.49 | 1.1     | 0.02    | 2.0     | 0.03 | 1.8  | 0.01 | 2.4  |
| 0.04 | 0.3     | 0.81    | 1.1     | 0.11 | 4.3  | 0.03 | 6.9  |
| 0.26 | 1.9     | 0.21    | 2.4     | 0.62 | 1.3  | 0.28 | 1.5  |
| 0.03 | 0.3     | 0.04    | 0.4     | 0.65 | 1.2  | 0.42 | 1.3  |
| 0.62 | 0.8     | 0.13    | 0.3     | 0.01 | 0.3  | 0.88 | 0.9  |
| 0.60 | 2.8     | 0.54    | 0.4     | 0.41 | 0.1  | 0.69 | 0.5  |
| 1.00 | 1.0     | 0.37    | 1.1     | 0.24 | 1.1  | 0.02 | 1.3  |

|      |         |         |         |      |     |       |     |
|------|---------|---------|---------|------|-----|-------|-----|
| 0.14 | #DIV/0! | #DIV/0! | #DIV/0! | 0.09 | 0.0 | 0.26  | 0.2 |
| 0.58 | 1.3     | 0.39    | 0.7     | 0.28 | 0.5 | 0.28  | 0.5 |
| 0.54 | 1.3     | 0.81    | 1.1     | 0.73 | 0.9 | 0.27  | 1.7 |
| 0.41 | #DIV/0! | 0.41    | #DIV/0! | 0.67 | 2.0 | 0.55  | 0.3 |
| 0.55 | 1.5     | 0.51    | 1.4     | 0.96 | 1.0 | 0.46  | 1.4 |
| 0.19 | #DIV/0! | #DIV/0! | #DIV/0! | 0.14 | 0.0 | 0.68  | 1.7 |
| 0.97 | 1.0     | 0.61    | 0.8     | 0.59 | 0.8 | 0.42  | 1.5 |
| 0.26 | 1.3     | 0.03    | 2.7     | 0.04 | 2.0 | 0.06  | 2.0 |
| 0.93 | 1.0     | 0.03    | 1.7     | 0.00 | 1.7 | 0.01  | 1.7 |
| 0.35 | 0.2     | 0.60    | 1.5     | 0.02 | 6.7 | 0.85  | 0.7 |
| 0.92 | 1.1     | 0.22    | 0.2     | 0.24 | 0.2 | 0.47  | 1.7 |
| 0.01 | 4.2     | 0.00    | 6.2     | 0.15 | 1.5 | 0.86  | 0.9 |
| 0.59 | 1.8     | 0.81    | 1.4     | 0.85 | 0.8 | 0.20  | 0.0 |
| 0.33 | 0.7     | 0.06    | 0.4     | 0.26 | 0.6 | 0.60  | 0.8 |
| 0.23 | 0.6     | 0.65    | 1.5     | 0.37 | 2.3 | 0.68  | 1.2 |
| 0.32 | 1.3     | 0.90    | 1.1     | 0.73 | 0.8 | 0.84  | 0.9 |
| 0.65 | 0.8     | 0.47    | 0.5     | 0.68 | 0.7 | 0.49  | 1.8 |
| 0.79 | 0.8     | 0.22    | 2.4     | 0.11 | 3.1 | 0.21  | 4.4 |
| 0.03 | 1.6     | 0.17    | 1.5     | 0.76 | 0.9 | 0.22  | 0.8 |
| 0.48 | 2.9     | 0.10    | 5.4     | 0.41 | 1.8 | 0.45  | 3.5 |
| 0.08 | 2.6     | 0.62    | 1.7     | 0.44 | 0.6 | 0.01  | 0.1 |
| 0.01 | 1.6     | 0.46    | 0.8     | 0.01 | 0.5 | 0.81  | 1.1 |
| 0.56 | 1.6     | 0.98    | 1.0     | 0.56 | 0.6 | 0.45  | 1.5 |
| 0.97 | 1.0     | 0.00    | 2.0     | 0.01 | 2.0 | 0.00  | 2.9 |
| 0.18 | 2.9     | 0.21    | 0.0     | 0.01 | 0.0 | 0.98  | 1.0 |
| 0.03 | 2.4     | 0.25    | 1.7     | 0.17 | 0.7 | 0.13  | 1.8 |
| 0.89 | 0.9     | 0.03    | 0.0     | 0.02 | 0.0 | 0.92  | 0.9 |
| 0.88 | 0.9     | 0.74    | 0.9     | 0.80 | 0.9 | 0.04  | 1.8 |
| 0.34 | 1.5     | 0.66    | 1.4     | 0.95 | 1.0 | 0.60  | 0.8 |
| 0.20 | #DIV/0! | 0.30    | #DIV/0! | 0.91 | 0.9 | 0.17  | 7.2 |
| 0.43 | 0.5     | 0.65    | 0.7     | 0.79 | 1.3 | 0.32  | 0.3 |
| 0.89 | 1.2     | 0.32    | 2.3     | 0.25 | 2.0 | 0.23  | 2.1 |
| 0.47 | 1.8     | 0.84    | 1.3     | 0.77 | 0.7 | 0.41  | 1.7 |
| 0.05 | 6.2     | 0.60    | 0.6     | 0.02 | 0.1 | 0.44  | 1.5 |
| 0.02 | 6.2     | 0.31    | 3.2     | 0.20 | 0.5 | 0.43  | 1.4 |
| 0.02 | 4.9     | 0.09    | 4.0     | 0.51 | 0.8 | 0.97  | 1.0 |
| 0.12 | 1.8     | 0.98    | 1.0     | 0.02 | 0.6 | 0.87  | 1.1 |
| 0.22 | 0.7     | 0.90    | 1.0     | 0.29 | 1.4 | 0.40  | 1.5 |
| 0.08 | #DIV/0! | 0.01    | #DIV/0! | 0.47 | 1.4 | 0.72  | 1.2 |
| 0.13 | 0.3     | 0.02    | 0.0     | 0.16 | 0.0 | 0.21  | 0.0 |
| 0.69 | 1.5     | 0.25    | 6.5     | 0.23 | 4.4 | 0.20  | 2.2 |
| 0.14 | #DIV/0! | 0.04    | #DIV/0! | 0.56 | 1.4 | 0.27  | 5.6 |
| 0.53 | 1.2     | 0.63    | 1.2     | 0.73 | 0.9 | 0.27  | 1.3 |
| 0.65 | 1.1     | 0.39    | 1.3     | 0.35 | 1.2 | 0.001 | 1.5 |
| 0.03 | 2.3     | 0.15    | 1.9     | 0.48 | 0.8 | 0.79  | 1.1 |
| 0.82 | 1.4     | 0.15    | 7.0     | 0.15 | 4.8 | 0.63  | 2.1 |
| 0.09 | 0.5     | 0.00    | 0.4     | 0.36 | 0.7 | 0.11  | 0.3 |
| 0.30 | 0.6     | 0.60    | 2.4     | 0.44 | 4.2 | 0.44  | 0.5 |
| 0.67 | 1.2     | 0.32    | 0.6     | 0.10 | 0.5 | 0.18  | 0.6 |
| 0.20 | #DIV/0! | 0.41    | #DIV/0! | 0.24 | 0.2 | 0.70  | 0.6 |
| 0.08 | 0.4     | 0.02    | 0.3     | 0.77 | 0.8 | 0.55  | 1.6 |
| 0.28 | 0.7     | 0.80    | 1.2     | 0.47 | 1.9 | 0.86  | 1.1 |

|      |         |      |         |       |     |      |      |
|------|---------|------|---------|-------|-----|------|------|
| 0.00 | 4.4     | 0.08 | 4.8     | 0.84  | 1.1 | 0.91 | 1.0  |
| 0.76 | 0.9     | 0.05 | 0.4     | 0.13  | 0.4 | 0.06 | 0.1  |
| 0.41 | 0.2     | 0.29 | 0.0     | 0.35  | 0.0 | 0.41 | 0.0  |
| 0.82 | 1.0     | 0.98 | 1.0     | 0.87  | 0.9 | 0.65 | 1.1  |
| 0.18 | 0.5     | 0.51 | 1.2     | 0.01  | 2.5 | 0.09 | 3.3  |
| 0.42 | 0.7     | 0.03 | 0.3     | 0.03  | 0.4 | 0.04 | 0.3  |
| 0.04 | 0.3     | 0.01 | 0.1     | 0.10  | 0.3 | 0.11 | 0.3  |
| 0.48 | 0.8     | 0.04 | 0.7     | 0.46  | 0.8 | 0.37 | 0.8  |
| 0.41 | 1.5     | 0.55 | 0.7     | 0.08  | 0.5 | 0.30 | 0.6  |
| 0.43 | 1.1     | 0.23 | 1.2     | 0.59  | 1.1 | 0.09 | 1.4  |
| 0.10 | 1.9     | 0.06 | 0.5     | 0.01  | 0.3 | 0.34 | 0.7  |
| 0.33 | 0.7     | 0.06 | 0.5     | 0.60  | 0.8 | 0.39 | 0.6  |
| 0.33 | 0.7     | 0.14 | 0.6     | 0.30  | 0.8 | 0.80 | 0.9  |
| 0.56 | 0.8     | 0.95 | 1.0     | 0.76  | 1.2 | 0.68 | 1.2  |
| 0.39 | 0.7     | 0.17 | 0.5     | 0.12  | 0.7 | 0.40 | 0.8  |
| 0.02 | 2.1     | 0.23 | 1.6     | 0.09  | 0.8 | 0.20 | 0.7  |
| 0.01 | 2.1     | 0.37 | 1.4     | 0.08  | 0.7 | 0.32 | 1.2  |
| 0.88 | 0.9     | 0.11 | 0.4     | 0.01  | 0.4 | 0.04 | 0.5  |
| 0.79 | 0.9     | 0.15 | 0.2     | 0.00  | 0.2 | 0.00 | 0.1  |
| 0.17 | 0.4     | 0.22 | 1.5     | 0.03  | 3.3 | 0.23 | 2.4  |
| 0.77 | 1.6     | 0.37 | 3.6     | 0.49  | 2.2 | 0.41 | 0.0  |
| 0.68 | 0.9     | 0.57 | 0.8     | 0.77  | 0.9 | 0.37 | 0.7  |
| 0.82 | 0.9     | 0.56 | 0.7     | 0.56  | 0.8 | 0.44 | 0.8  |
| 0.24 | 0.6     | 0.06 | 0.3     | 0.05  | 0.5 | 0.94 | 1.0  |
| 0.65 | 0.8     | 0.10 | 0.4     | 0.01  | 0.5 | 0.03 | 0.6  |
| 0.21 | 0.6     | 0.03 | 0.2     | 0.00  | 0.3 | 0.03 | 0.4  |
| 0.83 | 1.1     | 0.06 | 0.7     | 0.21  | 0.6 | 0.36 | 0.7  |
| 0.77 | 1.1     | 0.27 | 0.7     | 0.07  | 0.6 | 0.46 | 0.9  |
| 0.11 | 0.7     | 0.00 | 0.2     | 0.00  | 0.3 | 0.31 | 0.7  |
| 0.20 | 1.6     | 0.24 | 0.6     | 0.03  | 0.4 | 0.17 | 0.6  |
| 0.01 | 0.5     | 0.00 | 0.2     | 0.04  | 0.5 | 0.04 | 0.5  |
| 0.24 | 1.4     | 0.65 | 1.0     | 0.23  | 0.7 | 0.40 | 0.7  |
| 0.40 | 1.1     | 0.26 | 0.8     | 0.003 | 0.8 | 0.58 | 0.9  |
| 0.60 | 1.3     | 0.13 | 0.7     | 0.20  | 0.5 | 0.53 | 0.7  |
| 0.63 | 1.3     | 0.02 | 0.0     | 0.02  | 0.0 | 0.17 | 2.2  |
| 0.03 | 0.4     | 0.03 | 0.5     | 0.58  | 1.2 | 0.53 | 0.6  |
| 0.52 | 1.4     | 0.83 | 0.9     | 0.30  | 0.6 | 0.10 | 0.4  |
| 0.91 | 1.1     | 0.22 | 0.2     | 0.12  | 0.2 | 0.09 | 0.0  |
| 0.02 | #DIV/0! | 0.41 | #DIV/0! | 0.09  | 0.2 | 0.02 | 0.0  |
| 0.55 | 1.8     | 0.29 | 0.0     | 0.06  | 0.0 | 0.10 | 0.0  |
| 0.28 | 1.6     | 0.07 | 0.7     | 0.08  | 0.5 | 0.20 | 0.6  |
| 0.52 | 1.5     | 0.93 | 1.0     | 0.41  | 0.6 | 0.25 | 0.4  |
| 0.56 | 1.4     | 0.28 | 0.8     | 0.31  | 0.6 | 0.28 | 0.5  |
| 0.39 | 1.8     | 0.27 | 1.7     | 0.93  | 1.0 | 0.37 | 0.5  |
| 0.73 | 1.5     | 0.72 | 1.9     | 0.86  | 1.3 | 0.52 | 2.1  |
| 0.28 | 0.3     | 0.30 | 0.4     | 0.82  | 1.2 | 0.96 | 1.0  |
| 0.92 | 0.9     | 0.29 | 0.0     | 0.35  | 0.0 | 0.41 | 0.0  |
| 0.10 | 0.8     | 0.23 | 1.1     | 0.01  | 1.4 | 0.97 | 1.0  |
| 0.61 | 2.0     | 0.70 | 2.0     | 0.99  | 1.0 | 0.83 | 1.2  |
| 0.14 | 0.1     | 0.43 | 0.5     | 0.21  | 6.8 | 0.02 | 16.1 |
| 0.24 | #DIV/0! | 0.21 | #DIV/0! | 0.88  | 1.2 | 0.52 | 1.7  |
| 0.41 | #DIV/0! | 0.41 | #DIV/0! | 0.93  | 1.1 | 0.56 | 1.8  |

|      |         |         |         |      |     |      |     |
|------|---------|---------|---------|------|-----|------|-----|
| 0.49 | 2.4     | 0.55    | 1.9     | 0.81 | 0.8 | 0.24 | 0.1 |
| 0.97 | 0.9     | 0.91    | 1.1     | 0.87 | 1.2 | 0.75 | 0.6 |
| 0.27 | 0.7     | 0.37    | 0.7     | 0.87 | 1.1 | 0.51 | 1.4 |
| 0.61 | 1.8     | 0.39    | 0.2     | 0.19 | 0.1 | 0.71 | 0.7 |
| 0.06 | 4.0     | 0.27    | 3.3     | 0.70 | 0.8 | 0.86 | 1.1 |
| 0.63 | 0.9     | 0.27    | 1.2     | 0.24 | 1.3 | 0.14 | 1.4 |
| 0.95 | 1.0     | 0.69    | 0.8     | 0.48 | 0.8 | 0.73 | 0.9 |
| 0.11 | #DIV/0! | #DIV/0! | #DIV/0! | 0.07 | 0.0 | 0.22 | 0.2 |
| 0.02 | 0.3     | 0.01    | 0.3     | 0.97 | 1.0 | 0.61 | 1.5 |
| 0.59 | 0.8     | 0.33    | 1.6     | 0.16 | 2.0 | 0.31 | 2.2 |
| 0.52 | 0.6     | 0.16    | 0.2     | 0.14 | 0.3 | 0.07 | 0.0 |
| 0.52 | 2.6     | 0.29    | 0.0     | 0.21 | 0.0 | 0.27 | 0.0 |
| 0.25 | #DIV/0! | #DIV/0! | #DIV/0! | 0.19 | 0.0 | 0.49 | 0.4 |
| 0.09 | 0.7     | 0.80    | 1.1     | 0.26 | 1.5 | 0.01 | 2.4 |
| 0.14 | 0.5     | 0.95    | 1.0     | 0.35 | 2.0 | 0.12 | 2.9 |
| 0.89 | 1.0     | 0.25    | 1.2     | 0.37 | 1.2 | 0.01 | 1.5 |
| 0.49 | 0.6     | 0.50    | 2.3     | 0.33 | 3.9 | 0.86 | 1.3 |
| 0.79 | 0.9     | 0.18    | 0.7     | 0.35 | 0.7 | 0.25 | 0.6 |
| 0.41 | 1.8     | 0.65    | 1.6     | 0.89 | 0.9 | 0.68 | 1.2 |
| 0.77 | 0.7     | 0.29    | 0.0     | 0.14 | 0.0 | 0.22 | 0.0 |
| 0.36 | 1.6     | 0.91    | 0.9     | 0.35 | 0.6 | 0.30 | 1.7 |
| 0.77 | 1.1     | 0.61    | 1.1     | 0.82 | 1.0 | 0.44 | 0.8 |
| 0.00 | 2.9     | 0.00    | 4.8     | 0.01 | 1.6 | 0.15 | 1.4 |
| 0.92 | 0.9     | 0.43    | 0.5     | 0.23 | 0.6 | 0.27 | 0.5 |
| 0.90 | 1.1     | 0.75    | 0.8     | 0.64 | 0.8 | 0.10 | 0.4 |
| 0.35 | 4.0     | 0.70    | 2.0     | 0.55 | 0.5 | 0.63 | 0.6 |
| 0.41 | #DIV/0! | 0.07    | #DIV/0! | 0.92 | 0.9 | 0.71 | 0.5 |
| 0.18 | 0.9     | 0.07    | 1.3     | 0.01 | 1.4 | 0.00 | 1.6 |
| 0.20 | 0.6     | 0.91    | 0.9     | 0.39 | 1.5 | 0.72 | 1.1 |
| 0.18 | 1.2     | 0.08    | 1.3     | 0.54 | 1.1 | 0.21 | 1.3 |
| 0.81 | 0.9     | 0.72    | 0.8     | 0.82 | 0.8 | 0.30 | 1.6 |
| 0.33 | 0.8     | 0.93    | 1.0     | 0.20 | 1.3 | 0.48 | 1.2 |
| 0.42 | 1.2     | 0.71    | 1.3     | 0.99 | 1.0 | 0.09 | 0.4 |
| 0.78 | 0.9     | 0.83    | 0.9     | 0.96 | 1.0 | 0.14 | 1.7 |
| 0.01 | 0.5     | 0.00    | 0.2     | 0.02 | 0.4 | 0.04 | 0.5 |
| 0.78 | 0.9     | 0.23    | 1.5     | 0.02 | 1.7 | 0.31 | 1.7 |
| 0.93 | 0.9     | 0.52    | 2.0     | 0.44 | 2.2 | 0.01 | 9.7 |
| 0.39 | 4.1     | 0.77    | 0.8     | 0.31 | 0.2 | 0.41 | 2.0 |
| 0.97 | 1.0     | 0.71    | 1.0     | 0.88 | 1.0 | 0.10 | 1.8 |
| 0.90 | 0.9     | 0.66    | 1.6     | 0.59 | 1.8 | 0.30 | 2.5 |
| 0.41 | #DIV/0! | 0.23    | #DIV/0! | 0.74 | 1.5 | 0.25 | 6.1 |
| 0.48 | 0.8     | 0.18    | 0.8     | 0.79 | 0.9 | 0.84 | 1.1 |
| 0.52 | 1.9     | 0.28    | 2.4     | 0.66 | 1.3 | 0.58 | 0.6 |
| 0.90 | 1.0     | 0.04    | 0.4     | 0.03 | 0.4 | 0.04 | 0.4 |
| 0.54 | 2.0     | 0.60    | 2.5     | 0.85 | 1.3 | 0.46 | 1.8 |
| 0.53 | 0.6     | 0.42    | 0.4     | 0.71 | 0.7 | 0.37 | 2.4 |
| 0.25 | 1.3     | 0.03    | 1.7     | 0.24 | 1.3 | 0.47 | 1.2 |
| 0.48 | 0.8     | 0.71    | 1.1     | 0.33 | 1.3 | 0.67 | 1.2 |
| 0.26 | 5.9     | 0.45    | 0.3     | 0.14 | 0.0 | 0.59 | 1.6 |
| 0.86 | 1.0     | 0.25    | 0.6     | 0.24 | 0.6 | 0.62 | 1.3 |
| 0.73 | 0.7     | 0.20    | 2.8     | 0.04 | 4.3 | 0.27 | 3.3 |
| 0.00 | 24.6    | 0.00    | 33.7    | 0.22 | 1.4 | 0.73 | 1.2 |



|      |         |         |         |      |     |      |     |
|------|---------|---------|---------|------|-----|------|-----|
| 0.29 | 0.4     | 0.59    | 0.7     | 0.29 | 1.8 | 0.40 | 1.6 |
| 0.01 | 0.2     | 0.04    | 0.3     | 0.93 | 1.1 | 0.69 | 1.3 |
| 0.38 | 2.9     | 0.29    | 0.0     | 0.12 | 0.0 | 0.09 | 3.8 |
| 0.44 | 3.0     | 0.08    | 5.7     | 0.34 | 1.9 | 0.43 | 1.8 |
| 0.96 | 1.0     | 0.27    | 0.5     | 0.47 | 0.5 | 0.62 | 0.6 |
| 0.01 | 0.6     | 0.00    | 0.3     | 0.04 | 0.5 | 0.10 | 0.6 |
| 0.85 | 1.0     | 0.90    | 1.0     | 0.96 | 1.0 | 0.08 | 0.6 |
| 0.01 | #DIV/0! | 0.00    | #DIV/0! | 0.44 | 1.2 | 0.21 | 1.6 |
| 0.74 | 1.1     | 0.00    | 0.2     | 0.00 | 0.2 | 0.16 | 0.5 |
| 0.06 | 5.9     | 0.05    | 5.2     | 0.76 | 0.9 | 0.28 | 0.5 |
| 0.64 | 1.2     | 0.99    | 1.0     | 0.71 | 0.8 | 0.28 | 1.8 |
| 0.36 | 3.6     | 0.16    | 3.5     | 0.97 | 1.0 | 0.36 | 1.8 |
| 0.02 | 0.7     | 0.01    | 0.2     | 0.04 | 0.3 | 0.86 | 1.1 |
| 0.02 | 6.2     | 0.00    | 4.9     | 0.44 | 0.8 | 0.13 | 1.8 |
| 0.00 | 3.6     | 0.00    | 4.4     | 0.18 | 1.2 | 0.18 | 0.6 |
| 0.63 | 0.8     | 0.00    | 0.0     | 0.05 | 0.0 | 0.07 | 0.0 |
| 0.20 | 0.7     | 0.65    | 0.8     | 0.69 | 1.2 | 0.83 | 1.1 |
| 0.29 | 2.0     | 0.36    | 1.7     | 0.71 | 0.8 | 0.64 | 1.3 |
| 0.98 | 1.0     | 0.21    | 0.7     | 0.23 | 0.7 | 0.76 | 1.1 |
| 0.36 | 1.4     | 0.37    | 1.7     | 0.72 | 1.2 | 0.78 | 0.9 |
| 0.25 | 3.5     | 0.08    | 4.1     | 0.78 | 1.2 | 0.39 | 2.7 |
| 0.72 | 1.1     | 0.01    | 0.2     | 0.00 | 0.2 | 0.14 | 0.6 |
| 0.02 | 0.5     | 0.00    | 0.2     | 0.02 | 0.4 | 0.02 | 0.3 |
| 0.22 | 2.8     | 0.51    | 1.9     | 0.50 | 0.7 | 0.67 | 0.7 |
| 0.98 | 1.0     | 0.40    | 1.1     | 0.40 | 1.2 | 0.08 | 1.3 |
| 0.93 | 1.0     | 0.83    | 0.9     | 0.78 | 0.9 | 0.12 | 0.3 |
| 0.77 | 1.3     | 0.52    | 2.1     | 0.62 | 1.6 | 0.82 | 1.2 |
| 0.98 | 1.0     | 0.32    | 0.6     | 0.32 | 0.6 | 0.39 | 0.7 |
| 0.93 | 1.1     | 0.08    | 2.7     | 0.08 | 2.5 | 0.80 | 0.8 |
| 0.22 | 0.6     | 0.01    | 0.2     | 0.15 | 0.4 | 0.13 | 0.3 |
| 0.59 | 0.7     | 0.22    | 0.4     | 0.01 | 0.5 | 0.17 | 0.7 |
| 0.51 | 1.8     | 0.29    | 0.0     | 0.02 | 0.0 | 0.76 | 0.8 |
| 0.79 | 0.7     | 0.09    | 0.0     | 0.35 | 0.0 | 0.53 | 2.0 |
| 0.37 | 1.4     | 0.53    | 0.8     | 0.07 | 0.5 | 0.91 | 1.0 |
| 0.92 | 1.0     | 0.08    | 1.8     | 0.12 | 1.7 | 0.34 | 1.4 |
| 0.02 | 10.4    | 0.29    | 0.0     | 0.00 | 0.0 | 0.66 | 1.4 |
| 0.12 | 0.2     | 0.18    | 0.3     | 0.90 | 1.2 | 0.44 | 4.0 |
| 0.90 | 1.0     | 0.95    | 1.0     | 0.80 | 0.9 | 0.25 | 0.7 |
| 0.13 | 1.6     | 0.87    | 1.1     | 0.01 | 0.7 | 0.45 | 0.9 |
| 0.11 | #DIV/0! | #DIV/0! | #DIV/0! | 0.07 | 0.0 | 0.25 | 2.3 |
| 0.47 | 0.3     | 0.35    | 0.1     | 0.39 | 0.4 | 0.36 | 0.3 |
| 0.07 | 11.8    | 0.48    | 0.3     | 0.03 | 0.0 | 0.37 | 1.6 |
| 0.17 | 5.3     | 0.73    | 1.5     | 0.17 | 0.3 | 0.89 | 1.1 |
| 0.46 | 1.3     | 0.77    | 1.1     | 0.56 | 0.8 | 0.87 | 1.0 |
| 0.10 | 0.9     | 0.98    | 1.0     | 0.23 | 1.1 | 0.37 | 1.1 |
| 0.84 | 1.1     | 0.91    | 1.1     | 0.99 | 1.0 | 0.42 | 1.5 |
| 0.25 | 1.3     | 0.95    | 1.0     | 0.31 | 0.8 | 0.51 | 0.8 |
| 0.52 | 0.5     | 0.97    | 1.0     | 0.66 | 1.8 | 0.68 | 0.6 |
| 0.56 | 3.4     | 0.13    | 4.3     | 0.81 | 1.3 | 0.54 | 2.0 |
| 0.20 | #DIV/0! | #DIV/0! | #DIV/0! | 0.15 | 0.0 | 0.86 | 0.8 |
| 0.81 | 0.7     | 0.05    | 5.2     | 0.03 | 7.1 | 0.03 | 6.4 |
| 0.81 | 1.0     | 0.77    | 1.0     | 0.98 | 1.0 | 0.21 | 1.2 |

|      |         |         |         |      |     |      |     |
|------|---------|---------|---------|------|-----|------|-----|
| 0.77 | 0.9     | 0.53    | 1.2     | 0.41 | 1.3 | 0.08 | 1.5 |
| 0.30 | #DIV/0! | 0.41    | #DIV/0! | 0.28 | 0.1 | 0.61 | 0.5 |
| 0.41 | #DIV/0! | 0.25    | #DIV/0! | 0.99 | 1.0 | 0.41 | 0.0 |
| 0.75 | 1.1     | 0.59    | 1.2     | 0.57 | 1.1 | 0.02 | 1.3 |
| 0.74 | 1.2     | 0.05    | 6.4     | 0.03 | 5.4 | 0.07 | 2.4 |
| 0.48 | 1.3     | 0.88    | 0.9     | 0.30 | 0.7 | 0.21 | 1.5 |
| 0.07 | 2.6     | 0.60    | 1.4     | 0.20 | 0.5 | 0.50 | 0.7 |
| 0.14 | 1.4     | 0.72    | 1.0     | 0.08 | 0.7 | 0.78 | 1.1 |
| 0.07 | 2.3     | 0.71    | 0.7     | 0.03 | 0.3 | 0.22 | 0.7 |
| 0.95 | 1.0     | 0.31    | 0.5     | 0.34 | 0.4 | 0.94 | 1.0 |
| 0.89 | 1.0     | 0.77    | 0.9     | 0.71 | 0.9 | 0.29 | 1.3 |
| 0.50 | 1.4     | 0.26    | 0.4     | 0.08 | 0.3 | 0.60 | 1.2 |
| 0.41 | #DIV/0! | #DIV/0! | #DIV/0! | 0.35 | 0.0 | 0.97 | 0.9 |
| 0.79 | 1.2     | 0.87    | 0.9     | 0.62 | 0.7 | 0.38 | 0.5 |
| 0.26 | 0.2     | 0.28    | 0.3     | 0.79 | 1.3 | 0.58 | 1.9 |
| 0.73 | 1.1     | 0.07    | 0.5     | 0.10 | 0.4 | 0.94 | 1.0 |
| 0.94 | 1.0     | 0.33    | 0.7     | 0.26 | 0.7 | 0.68 | 1.1 |
| 0.24 | 2.1     | 0.29    | 1.7     | 0.64 | 0.8 | 0.11 | 0.3 |
| 0.53 | 1.3     | 0.68    | 1.1     | 0.74 | 0.9 | 0.13 | 0.4 |
| 0.21 | 4.9     | 0.29    | 0.0     | 0.07 | 0.0 | 0.72 | 0.7 |
| 0.41 | #DIV/0! | 0.41    | #DIV/0! | 0.77 | 1.6 | 0.41 | 0.0 |
| 0.64 | 1.7     | 0.17    | 2.4     | 0.70 | 1.4 | 0.45 | 1.9 |
| 0.41 | #DIV/0! | 0.19    | #DIV/0! | 0.40 | 2.7 | 0.99 | 1.0 |
| 0.41 | #DIV/0! | 0.13    | #DIV/0! | 0.69 | 1.5 | 0.07 | 5.6 |
| 0.25 | 0.9     | 0.83    | 1.0     | 0.50 | 1.1 | 0.25 | 1.1 |
| 0.41 | #DIV/0! | #DIV/0! | #DIV/0! | 0.35 | 0.0 | 0.41 | 0.0 |
| 0.77 | 1.0     | 0.15    | 1.3     | 0.11 | 1.4 | 0.05 | 1.5 |
| 0.77 | 0.9     | 0.47    | 1.1     | 0.43 | 1.2 | 0.54 | 0.8 |
| 0.88 | 1.0     | 0.41    | 1.2     | 0.35 | 1.3 | 0.85 | 1.1 |
| 0.14 | 0.6     | 0.42    | 1.2     | 0.05 | 2.1 | 0.82 | 0.9 |
| 0.23 | 0.6     | 0.55    | 1.2     | 0.14 | 2.0 | 0.23 | 2.0 |
| 0.24 | #DIV/0! | #DIV/0! | #DIV/0! | 0.18 | 0.0 | 0.24 | 0.0 |
| 0.13 | 5.8     | 0.06    | 4.8     | 0.70 | 0.8 | 0.78 | 0.9 |
| 0.20 | #DIV/0! | 0.08    | #DIV/0! | 0.90 | 1.1 | 0.90 | 0.9 |
| 0.03 | #DIV/0! | 0.08    | #DIV/0! | 0.39 | 1.7 | 0.93 | 1.0 |
| 0.08 | 0.3     | 0.52    | 0.7     | 0.31 | 2.4 | 0.69 | 1.3 |
| 0.68 | 0.5     | 0.69    | 0.6     | 0.99 | 1.0 | 0.96 | 1.1 |
| 0.24 | 4.3     | 0.98    | 1.0     | 0.18 | 0.2 | 0.39 | 0.4 |
| 0.41 | 0.8     | 0.09    | 1.3     | 0.03 | 1.6 | 0.01 | 1.7 |
| 0.88 | 0.9     | 0.29    | 2.0     | 0.18 | 2.3 | 0.70 | 1.3 |
| 0.24 | 1.1     | 0.03    | 1.4     | 0.05 | 1.3 | 0.00 | 1.3 |
| 0.82 | 1.2     | 0.09    | 2.7     | 0.11 | 2.3 | 0.61 | 1.7 |
| 0.41 | #DIV/0! | 0.41    | #DIV/0! | 0.41 | 8.1 | 0.41 | 0.0 |
| 0.14 | 1.6     | 0.07    | 2.8     | 0.16 | 1.8 | 0.07 | 1.7 |
| 0.74 | 0.9     | 0.12    | 0.7     | 0.52 | 0.8 | 0.14 | 0.5 |
| 0.15 | #DIV/0! | 0.07    | #DIV/0! | 0.53 | 1.5 | 0.75 | 1.2 |
| 0.04 | 1.4     | 0.06    | 1.4     | 1.00 | 1.0 | 0.51 | 0.9 |
| 0.77 | 1.1     | 0.06    | 2.9     | 0.05 | 2.6 | 0.02 | 2.2 |
| 0.00 | 3.1     | 0.00    | 4.4     | 0.13 | 1.4 | 0.85 | 1.0 |
| 0.36 | 1.4     | 0.49    | 2.2     | 0.62 | 1.5 | 0.79 | 0.8 |
| 0.68 | 1.4     | 0.26    | 2.0     | 0.51 | 1.4 | 0.65 | 1.3 |
| 0.43 | 0.7     | 0.24    | 0.8     | 0.75 | 1.1 | 0.86 | 0.9 |

|      |         |         |         |      |     |      |     |
|------|---------|---------|---------|------|-----|------|-----|
| 0.43 | 1.3     | 0.05    | 1.8     | 0.04 | 1.4 | 0.68 | 1.2 |
| 0.93 | 1.0     | 0.88    | 1.0     | 0.98 | 1.0 | 0.18 | 1.3 |
| 0.08 | 1.7     | 0.04    | 2.3     | 0.14 | 1.4 | 0.38 | 1.2 |
| 0.23 | 0.4     | 0.70    | 0.8     | 0.10 | 1.9 | 0.83 | 1.1 |
| 0.17 | 1.3     | 0.02    | 1.5     | 0.29 | 1.2 | 0.07 | 1.3 |
| 0.00 | 3.8     | 0.11    | 3.1     | 0.59 | 0.8 | 0.65 | 1.2 |
| 0.60 | 1.1     | 0.99    | 1.0     | 0.87 | 0.9 | 0.47 | 0.8 |
| 0.67 | 1.1     | 0.06    | 1.7     | 0.07 | 1.6 | 0.01 | 1.6 |
| 0.01 | 4.9     | 0.14    | 2.8     | 0.14 | 0.6 | 0.21 | 0.6 |
| 0.91 | 1.0     | 0.52    | 1.2     | 0.39 | 1.2 | 0.59 | 1.1 |
| 0.42 | 0.6     | 0.58    | 0.7     | 0.63 | 1.2 | 0.98 | 1.0 |
| 0.38 | 1.6     | 0.40    | 1.5     | 0.84 | 0.9 | 0.24 | 1.5 |
| 0.90 | 1.1     | 0.53    | 0.5     | 0.39 | 0.5 | 0.69 | 0.7 |
| 0.17 | 5.5     | 0.29    | 0.0     | 0.05 | 0.0 | 0.09 | 0.0 |
| 0.82 | 1.3     | 0.64    | 2.0     | 0.72 | 1.5 | 0.68 | 0.6 |
| 0.09 | #DIV/0! | 0.41    | #DIV/0! | 0.14 | 0.2 | 0.09 | 0.0 |
| 0.07 | 7.4     | 0.49    | 0.3     | 0.03 | 0.0 | 0.04 | 0.0 |
| 0.92 | 1.0     | 0.55    | 0.8     | 0.53 | 0.8 | 0.41 | 0.7 |
| 0.67 | 1.3     | 0.16    | 0.3     | 0.10 | 0.2 | 0.04 | 0.0 |
| 0.23 | #DIV/0! | 0.21    | #DIV/0! | 0.83 | 0.8 | 0.23 | 0.0 |
| 0.58 | 1.5     | 0.17    | 2.9     | 0.28 | 1.9 | 0.26 | 2.0 |
| 0.82 | 1.0     | 0.87    | 1.0     | 0.73 | 1.1 | 0.37 | 1.2 |
| 0.38 | 0.7     | 0.56    | 1.3     | 0.21 | 1.8 | 0.20 | 1.8 |
| 0.93 | 1.1     | 0.32    | 1.8     | 0.37 | 1.7 | 0.69 | 1.2 |
| 0.45 | 1.8     | 0.32    | 2.0     | 0.85 | 1.1 | 0.61 | 1.4 |
| 0.03 | 1.3     | 0.18    | 1.4     | 0.71 | 1.1 | 0.24 | 1.2 |
| 0.50 | 1.5     | 0.65    | 0.8     | 0.15 | 0.5 | 0.97 | 1.0 |
| 0.34 | 0.3     | 0.34    | 1.8     | 0.05 | 5.5 | 0.24 | 3.1 |
| 0.42 | 0.8     | 0.69    | 0.9     | 0.52 | 1.2 | 0.87 | 1.1 |
| 0.53 | 1.4     | 0.44    | 1.8     | 0.67 | 1.2 | 0.02 | 2.3 |
| 0.24 | 0.5     | 0.80    | 0.9     | 0.09 | 1.8 | 0.07 | 1.9 |
| 0.79 | 1.1     | 0.41    | 2.1     | 0.42 | 1.8 | 0.03 | 2.5 |
| 0.65 | 0.7     | 0.48    | 0.6     | 0.58 | 0.8 | 0.24 | 0.6 |
| 0.01 | 1.8     | 0.00    | 1.8     | 0.95 | 1.0 | 0.50 | 0.9 |
| 0.55 | 0.8     | 0.76    | 1.2     | 0.46 | 1.5 | 0.26 | 1.6 |
| 0.06 | 0.7     | 0.07    | 0.5     | 0.32 | 0.6 | 0.45 | 1.2 |
| 0.51 | 1.1     | 0.00    | 1.6     | 0.04 | 1.4 | 0.13 | 1.3 |
| 0.14 | 1.5     | 0.60    | 1.1     | 0.31 | 0.8 | 0.67 | 1.1 |
| 0.41 | #DIV/0! | 0.41    | #DIV/0! | 0.73 | 1.7 | 0.64 | 1.7 |
| 0.28 | #DIV/0! | #DIV/0! | #DIV/0! | 0.23 | 0.0 | 0.28 | 0.0 |
| 0.91 | 0.9     | 0.39    | 1.6     | 0.15 | 1.7 | 0.05 | 2.5 |
| 0.51 | 0.5     | 1.00    | 1.0     | 0.57 | 1.9 | 0.97 | 1.1 |
| 0.68 | 1.5     | 0.31    | 7.9     | 0.29 | 5.1 | 0.54 | 1.5 |
| 0.72 | 1.2     | 0.37    | 0.7     | 0.26 | 0.5 | 0.15 | 0.4 |
| 0.17 | 1.6     | 0.77    | 1.2     | 0.44 | 0.7 | 0.55 | 0.7 |
| 0.58 | 1.1     | 0.50    | 1.1     | 0.99 | 1.0 | 0.20 | 0.8 |
| 0.51 | 1.4     | 0.13    | 2.3     | 0.36 | 1.6 | 0.69 | 1.2 |
| 0.29 | 30.7    | 0.66    | 2.2     | 0.25 | 0.1 | 0.40 | 0.2 |
| 0.63 | 0.7     | 0.81    | 1.2     | 0.42 | 1.7 | 0.16 | 0.3 |
| 0.59 | 1.3     | 0.16    | 1.9     | 0.39 | 1.4 | 0.12 | 1.8 |
| 0.80 | 0.8     | 0.09    | 1.3     | 0.40 | 1.6 | 0.66 | 1.3 |
| 0.42 | 4.1     | 0.96    | 1.0     | 0.36 | 0.3 | 0.40 | 0.2 |

|      |         |         |         |      |      |      |     |
|------|---------|---------|---------|------|------|------|-----|
| 0.49 | 2.8     | 0.33    | 0.1     | 0.22 | 0.0  | 0.65 | 0.6 |
| 0.99 | 1.0     | 0.12    | 0.3     | 0.20 | 0.3  | 0.13 | 0.1 |
| 0.23 | #DIV/0! | #DIV/0! | #DIV/0! | 0.18 | 0.0  | 0.23 | 0.0 |
| 0.16 | 4.1     | 0.64    | 0.5     | 0.07 | 0.1  | 0.23 | 0.3 |
| 0.10 | 0.1     | 0.26    | 1.9     | 0.01 | 16.5 | 0.39 | 5.5 |
| 0.40 | 0.9     | 0.54    | 1.1     | 0.23 | 1.3  | 0.01 | 1.6 |
| 0.16 | #DIV/0! | 0.41    | #DIV/0! | 0.68 | 1.8  | 0.16 | 0.0 |
| 0.22 | 1.8     | 0.01    | 2.8     | 0.03 | 1.6  | 0.83 | 1.0 |
| 0.57 | 0.9     | 0.81    | 0.9     | 0.88 | 1.1  | 0.38 | 1.2 |
| 0.51 | 1.6     | 0.06    | 1.5     | 0.89 | 0.9  | 0.98 | 1.0 |
| 0.21 | 1.1     | 0.04    | 1.5     | 0.06 | 1.3  | 0.00 | 1.4 |
| 0.50 | 1.7     | 0.09    | 2.7     | 0.36 | 1.6  | 0.75 | 0.8 |
| 0.59 | 0.5     | 0.38    | 2.5     | 0.21 | 4.7  | 0.02 | 5.7 |
| 0.41 | 14.7    | 0.01    | 1.8     | 0.38 | 0.1  | 0.43 | 0.1 |
| 0.32 | 1.8     | 0.01    | 1.8     | 0.96 | 1.0  | 0.41 | 0.6 |
| 0.19 | #DIV/0! | 0.06    | #DIV/0! | 0.12 | 3.7  | 0.01 | 3.7 |
| 0.58 | 0.8     | 0.35    | 1.6     | 0.23 | 1.9  | 0.33 | 1.6 |
| 0.08 | 1.8     | 0.23    | 2.4     | 0.57 | 1.3  | 0.75 | 1.1 |
| 0.41 | #DIV/0! | 0.41    | #DIV/0! | 0.37 | 0.1  | 0.85 | 1.2 |
| 0.33 | 2.8     | 0.55    | 2.1     | 0.76 | 0.8  | 0.79 | 0.8 |
| 0.53 | 1.3     | 0.38    | 1.5     | 0.60 | 1.2  | 0.01 | 1.7 |
| 0.60 | 0.5     | 0.70    | 1.5     | 0.24 | 3.1  | 0.50 | 1.8 |
| 0.46 | 1.4     | 0.39    | 1.7     | 0.58 | 1.2  | 0.55 | 1.3 |
| 0.22 | 2.3     | 0.35    | 3.1     | 0.70 | 1.3  | 0.38 | 0.6 |
| 0.67 | 1.2     | 0.98    | 1.0     | 0.72 | 0.8  | 0.73 | 0.8 |
| 0.60 | 1.2     | 0.05    | 1.8     | 0.12 | 1.5  | 0.09 | 1.6 |
| 0.08 | 5.0     | 0.15    | 5.3     | 0.92 | 1.1  | 0.68 | 1.2 |
| 0.41 | #DIV/0! | 0.19    | #DIV/0! | 0.21 | 6.9  | 0.25 | 5.3 |
| 0.28 | 1.2     | 0.75    | 1.1     | 0.71 | 0.9  | 0.32 | 1.1 |
| 0.46 | 1.6     | 0.46    | 1.9     | 0.78 | 1.2  | 0.65 | 0.7 |
| 0.56 | 1.2     | 0.01    | 2.4     | 0.04 | 1.9  | 0.01 | 2.2 |
| 0.67 | 1.5     | 0.45    | 2.6     | 0.60 | 1.7  | 0.62 | 1.4 |
| 0.49 | 0.7     | 0.84    | 1.1     | 0.40 | 1.5  | 0.21 | 1.7 |
| 0.72 | 1.2     | 0.08    | 2.3     | 0.18 | 1.9  | 0.34 | 1.7 |
| 0.54 | 2.0     | 0.98    | 1.0     | 0.53 | 0.5  | 0.46 | 1.9 |
| 0.22 | #DIV/0! | 0.41    | #DIV/0! | 0.55 | 0.5  | 0.22 | 0.0 |
| 0.15 | 3.7     | 0.53    | 2.3     | 0.55 | 0.6  | 0.08 | 0.1 |
| 0.31 | 2.9     | 0.03    | 7.8     | 0.10 | 2.7  | 0.09 | 2.4 |
| 0.11 | 0.6     | 0.29    | 0.8     | 0.32 | 1.3  | 0.10 | 1.6 |
| 0.89 | 0.8     | 0.23    | 4.3     | 0.15 | 5.2  | 0.39 | 5.9 |
| 0.20 | #DIV/0! | 0.41    | #DIV/0! | 0.36 | 0.3  | 0.31 | 0.2 |
| 0.41 | #DIV/0! | 0.41    | #DIV/0! | 0.81 | 0.7  | 0.41 | 0.0 |
| 0.43 | 23.0    | 0.29    | 0.0     | 0.35 | 0.0  | 0.41 | 0.0 |
| 0.11 | 0.5     | 0.05    | 1.3     | 0.01 | 2.6  | 0.23 | 2.0 |
| 0.02 | 0.2     | 0.60    | 1.2     | 0.02 | 5.1  | 0.05 | 5.2 |
| 0.19 | #DIV/0! | #DIV/0! | #DIV/0! | 0.14 | 0.0  | 0.42 | 0.4 |
| 0.98 | 1.0     | 0.27    | 2.8     | 0.26 | 2.9  | 0.30 | 2.8 |
| 0.02 | 0.6     | 0.92    | 1.0     | 0.05 | 1.6  | 0.01 | 1.7 |
| 0.82 | 1.0     | 0.07    | 1.2     | 0.08 | 1.3  | 0.66 | 1.1 |
| 0.41 | #DIV/0! | 0.41    | #DIV/0! | 0.53 | 3.2  | 0.41 | 0.0 |
| 0.38 | 1.3     | 0.62    | 1.3     | 0.97 | 1.0  | 0.06 | 1.6 |
| 0.70 | 1.2     | 0.15    | 1.9     | 0.26 | 1.6  | 0.38 | 1.4 |

|      |         |      |         |      |      |      |      |
|------|---------|------|---------|------|------|------|------|
| 0.98 | 1.0     | 0.29 | 1.4     | 0.24 | 1.4  | 0.54 | 1.3  |
| 0.29 | #DIV/0! | 0.41 | #DIV/0! | 0.84 | 0.8  | 0.34 | 0.1  |
| 0.41 | 1.3     | 0.10 | 2.4     | 0.13 | 1.8  | 0.05 | 2.0  |
| 0.16 | 0.3     | 0.80 | 0.8     | 0.40 | 2.8  | 0.18 | 3.6  |
| 0.80 | 0.9     | 0.65 | 1.1     | 0.52 | 1.2  | 0.21 | 0.7  |
| 0.56 | 1.1     | 0.14 | 1.5     | 0.17 | 1.3  | 0.14 | 1.2  |
| 0.11 | 9.3     | 0.06 | 8.6     | 0.89 | 0.9  | 0.94 | 1.0  |
| 0.41 | #DIV/0! | 0.41 | #DIV/0! | 0.38 | 0.1  | 0.41 | 0.0  |
| 0.14 | 1.2     | 0.11 | 2.4     | 0.12 | 2.0  | 0.00 | 1.7  |
| 0.96 | 1.0     | 0.17 | 2.3     | 0.19 | 2.2  | 0.92 | 0.9  |
| 0.01 | 0.6     | 0.00 | 0.3     | 0.00 | 0.5  | 0.01 | 0.4  |
| 0.41 | 1.2     | 0.00 | 1.6     | 0.13 | 1.3  | 0.22 | 1.3  |
| 0.41 | #DIV/0! | 0.41 | #DIV/0! | 0.39 | 12.4 | 0.32 | 17.9 |
| 0.18 | 2.4     | 0.12 | 2.9     | 0.42 | 1.2  | 0.64 | 1.1  |
| 0.98 | 1.0     | 0.40 | 0.8     | 0.18 | 0.8  | 0.03 | 0.7  |
| 0.41 | #DIV/0! | 0.41 | #DIV/0! | 0.41 | 0.1  | 0.41 | 0.0  |
| 0.45 | 0.8     | 0.64 | 1.1     | 0.12 | 1.5  | 0.08 | 2.0  |
| 0.11 | 0.6     | 0.80 | 1.1     | 0.18 | 1.8  | 0.18 | 1.7  |
| 0.97 | 1.1     | 0.18 | 3.2     | 0.19 | 3.1  | 0.25 | 5.8  |
| 0.90 | 1.0     | 0.07 | 1.2     | 0.10 | 1.2  | 0.61 | 1.1  |
| 0.31 | 1.2     | 0.68 | 1.1     | 0.77 | 0.9  | 0.26 | 0.9  |
| 0.43 | 0.5     | 0.74 | 1.1     | 0.24 | 2.4  | 0.49 | 2.0  |
| 0.17 | 0.8     | 0.90 | 1.0     | 0.31 | 1.4  | 0.69 | 1.1  |
| 0.22 | 0.8     | 0.43 | 0.9     | 0.44 | 1.1  | 0.60 | 0.9  |
| 0.90 | 1.0     | 0.20 | 1.4     | 0.11 | 1.5  | 0.87 | 1.1  |
| 0.90 | 0.8     | 0.65 | 0.5     | 0.74 | 0.6  | 0.68 | 1.7  |
| 0.16 | 0.7     | 0.99 | 1.0     | 0.26 | 1.5  | 0.08 | 2.2  |
| 0.25 | #DIV/0! | 0.07 | #DIV/0! | 0.19 | 3.2  | 0.25 | 0.0  |
| 0.75 | 1.3     | 0.52 | 0.6     | 0.44 | 0.4  | 0.15 | 2.5  |
| 0.60 | 0.9     | 1.00 | 1.0     | 0.55 | 1.1  | 0.83 | 1.0  |
| 0.13 | #DIV/0! | 0.41 | #DIV/0! | 0.19 | 0.2  | 0.29 | 0.3  |
| 0.12 | 0.7     | 0.11 | 1.5     | 0.01 | 2.2  | 0.02 | 1.9  |
| 0.47 | 1.2     | 0.08 | 1.3     | 0.35 | 1.2  | 0.71 | 1.1  |
| 0.34 | 0.7     | 0.31 | 0.7     | 0.88 | 0.9  | 0.61 | 0.8  |
| 0.20 | 1.2     | 0.00 | 1.4     | 0.25 | 1.1  | 0.50 | 1.1  |
| 0.25 | 0.5     | 0.28 | 0.5     | 0.94 | 1.0  | 0.44 | 1.6  |
| 0.43 | 1.9     | 0.22 | 4.8     | 0.28 | 2.6  | 0.96 | 0.9  |
| 0.15 | 0.4     | 0.93 | 1.0     | 0.03 | 2.6  | 0.68 | 1.3  |
| 0.99 | 1.0     | 0.37 | 1.9     | 0.33 | 1.9  | 0.19 | 2.0  |
| 0.34 | 1.9     | 0.07 | 2.3     | 0.63 | 1.2  | 0.28 | 1.5  |
| 0.61 | 1.4     | 0.11 | 4.9     | 0.11 | 3.5  | 0.01 | 4.8  |
| 0.56 | 1.1     | 0.13 | 1.2     | 0.88 | 1.0  | 0.58 | 1.1  |
| 0.26 | 2.4     | 0.16 | 2.1     | 0.78 | 0.9  | 0.46 | 0.6  |
| 0.45 | 0.7     | 0.87 | 1.1     | 0.32 | 1.4  | 0.90 | 1.1  |
| 0.55 | 0.4     | 0.74 | 0.7     | 0.48 | 1.6  | 0.63 | 0.6  |
| 0.09 | #DIV/0! | 0.11 | #DIV/0! | 0.48 | 1.7  | 0.85 | 1.2  |
| 0.76 | 0.9     | 0.21 | 0.6     | 0.28 | 0.6  | 0.31 | 0.7  |
| 0.14 | 6.0     | 0.35 | 4.0     | 0.60 | 0.7  | 0.08 | 0.0  |
| 0.53 | 1.2     | 0.65 | 1.1     | 0.71 | 0.9  | 0.84 | 1.0  |
| 0.82 | 1.1     | 0.24 | 1.3     | 0.18 | 1.2  | 0.84 | 1.0  |
| 0.58 | 1.0     | 0.27 | 0.9     | 0.11 | 0.8  | 0.02 | 0.7  |
| 0.39 | 5.5     | 0.75 | 0.8     | 0.31 | 0.2  | 0.48 | 0.3  |

|      |         |      |         |      |     |      |     |
|------|---------|------|---------|------|-----|------|-----|
| 0.48 | 1.3     | 0.17 | 1.6     | 0.41 | 1.2 | 0.83 | 0.9 |
| 0.37 | 1.7     | 0.17 | 2.2     | 0.55 | 1.3 | 0.04 | 0.1 |
| 0.69 | 1.3     | 0.05 | 2.8     | 0.12 | 2.1 | 0.34 | 1.8 |
| 0.65 | 0.8     | 0.47 | 1.4     | 0.16 | 1.8 | 0.36 | 1.6 |
| 0.32 | 5.2     | 0.91 | 1.2     | 0.29 | 0.2 | 0.56 | 1.7 |
| 0.27 | 0.7     | 0.42 | 0.7     | 0.85 | 1.1 | 0.81 | 1.1 |
| 0.38 | 0.2     | 0.39 | 0.2     | 0.97 | 1.1 | 0.18 | 6.1 |
| 0.76 | 1.6     | 0.80 | 0.8     | 0.63 | 0.5 | 0.77 | 1.4 |
| 0.26 | 0.4     | 0.42 | 0.6     | 0.28 | 1.5 | 0.16 | 1.6 |
| 0.35 | 1.3     | 0.14 | 1.4     | 0.75 | 1.1 | 0.75 | 1.1 |
| 0.51 | 5.1     | 0.03 | 17.7    | 0.13 | 3.5 | 0.67 | 1.6 |
| 0.30 | 1.5     | 0.26 | 0.4     | 0.01 | 0.3 | 0.00 | 0.1 |
| 0.43 | 2.2     | 0.86 | 0.9     | 0.34 | 0.4 | 0.79 | 1.2 |
| 0.45 | 1.2     | 0.32 | 2.6     | 0.31 | 2.2 | 0.16 | 2.4 |
| 0.89 | 0.9     | 0.59 | 1.2     | 0.57 | 1.3 | 0.69 | 1.2 |
| 0.31 | 3.5     | 0.18 | 11.0    | 0.26 | 3.2 | 0.69 | 1.3 |
| 0.45 | 0.9     | 0.15 | 1.3     | 0.05 | 1.4 | 0.01 | 1.7 |
| 0.20 | 1.3     | 0.03 | 1.6     | 0.14 | 1.3 | 0.01 | 1.6 |
| 0.21 | 1.2     | 0.02 | 1.5     | 0.09 | 1.3 | 0.00 | 1.6 |
| 0.41 | #DIV/0! | 0.03 | #DIV/0! | 0.13 | 3.6 | 0.00 | 9.0 |
| 0.80 | 1.3     | 0.24 | 5.4     | 0.22 | 4.0 | 0.16 | 3.1 |
| 0.29 | 2.1     | 0.04 | 4.3     | 0.12 | 2.1 | 0.32 | 1.8 |
| 0.12 | 1.7     | 0.11 | 1.8     | 0.64 | 1.1 | 0.79 | 1.1 |
| 0.82 | 0.9     | 0.62 | 0.8     | 0.80 | 0.9 | 0.23 | 1.6 |
| 0.42 | 0.4     | 0.96 | 1.1     | 0.51 | 2.8 | 0.37 | 1.7 |
| 0.24 | 0.4     | 0.39 | 0.6     | 0.29 | 1.3 | 0.01 | 1.7 |
| 0.47 | 0.8     | 0.50 | 0.9     | 0.86 | 1.0 | 0.02 | 1.4 |
| 0.19 | #DIV/0! | 0.06 | #DIV/0! | 0.15 | 3.3 | 0.02 | 5.0 |
| 0.80 | 0.9     | 0.61 | 0.7     | 0.69 | 0.8 | 0.80 | 0.9 |
| 0.40 | 3.2     | 0.13 | 7.6     | 0.28 | 2.4 | 0.59 | 1.5 |
| 0.88 | 1.1     | 0.31 | 2.2     | 0.32 | 2.0 | 0.78 | 1.1 |
| 0.63 | 1.2     | 0.57 | 1.2     | 0.88 | 1.0 | 0.87 | 0.9 |
| 0.09 | 1.4     | 0.05 | 0.3     | 0.00 | 0.2 | 0.17 | 1.3 |
| 0.09 | 4.1     | 0.45 | 2.5     | 0.45 | 0.6 | 0.86 | 1.1 |
| 0.09 | 2.6     | 0.02 | 2.7     | 0.91 | 1.0 | 0.43 | 1.4 |
| 0.78 | 1.2     | 0.72 | 1.3     | 0.88 | 1.1 | 0.88 | 0.9 |
| 0.56 | 0.9     | 0.86 | 1.0     | 0.46 | 1.2 | 0.02 | 1.7 |
| 0.16 | 1.9     | 0.26 | 1.7     | 0.70 | 0.9 | 0.26 | 1.5 |
| 0.56 | 1.2     | 0.53 | 1.2     | 0.88 | 0.9 | 0.86 | 0.9 |
| 0.74 | 1.1     | 0.17 | 1.6     | 0.24 | 1.5 | 0.24 | 1.5 |
| 0.73 | 1.2     | 0.57 | 1.2     | 0.97 | 1.0 | 0.38 | 1.5 |
| 0.87 | 0.8     | 0.29 | 0.0     | 0.16 | 0.0 | 0.05 | 6.6 |
| 0.14 | 4.7     | 0.09 | 9.9     | 0.28 | 2.1 | 0.04 | 3.1 |
| 0.80 | 1.3     | 0.29 | 0.0     | 0.15 | 0.0 | 0.89 | 1.1 |
| 0.19 | 3.5     | 0.29 | 0.0     | 0.03 | 0.0 | 0.05 | 0.0 |
| 0.23 | 1.8     | 0.03 | 2.8     | 0.17 | 1.6 | 0.01 | 2.3 |
| 0.34 | 1.4     | 0.34 | 1.3     | 0.81 | 0.9 | 0.77 | 0.9 |
| 0.19 | #DIV/0! | 0.23 | #DIV/0! | 0.74 | 0.7 | 0.50 | 0.4 |
| 0.36 | #DIV/0! | 0.41 | #DIV/0! | 0.31 | 0.0 | 0.38 | 0.0 |
| 0.80 | 0.8     | 0.58 | 0.8     | 0.93 | 0.9 | 0.96 | 1.0 |
| 0.82 | 1.1     | 0.23 | 1.2     | 0.68 | 1.1 | 0.61 | 0.8 |
| 0.69 | 1.1     | 0.01 | 1.7     | 0.02 | 1.6 | 0.03 | 1.5 |

|      |         |         |         |      |     |      |     |
|------|---------|---------|---------|------|-----|------|-----|
| 0.85 | 0.9     | 0.70    | 1.5     | 0.56 | 1.8 | 0.76 | 1.4 |
| 0.69 | 1.4     | 0.83    | 1.2     | 0.85 | 0.8 | 0.25 | 0.2 |
| 0.72 | 1.1     | 0.60    | 1.3     | 0.73 | 1.1 | 0.48 | 1.4 |
| 0.59 | 1.1     | 0.16    | 1.3     | 0.38 | 1.1 | 0.70 | 0.9 |
| 0.43 | 2.1     | 0.58    | 1.7     | 0.79 | 0.8 | 0.46 | 0.6 |
| 0.41 | 1.1     | 0.00    | 1.5     | 0.00 | 1.4 | 0.02 | 1.5 |
| 0.87 | 1.0     | 0.83    | 1.0     | 0.73 | 1.0 | 0.12 | 1.2 |
| 0.56 | 0.9     | 0.90    | 1.0     | 0.79 | 1.1 | 0.12 | 0.7 |
| 0.28 | 2.1     | 0.54    | 1.8     | 0.77 | 0.8 | 0.13 | 0.3 |
| 0.29 | 1.3     | 0.25    | 1.7     | 0.43 | 1.3 | 0.22 | 1.4 |
| 0.37 | 1.1     | 0.18    | 1.2     | 0.30 | 1.1 | 0.28 | 1.1 |
| 0.45 | 0.4     | 0.59    | 0.5     | 0.87 | 1.3 | 0.41 | 0.0 |
| 0.81 | 1.0     | 0.76    | 1.0     | 0.83 | 1.0 | 0.44 | 0.9 |
| 0.79 | 1.0     | 0.83    | 1.0     | 0.60 | 1.0 | 0.85 | 1.0 |
| 0.14 | 3.0     | 0.10    | 2.9     | 0.95 | 1.0 | 0.35 | 0.5 |
| 0.71 | 1.9     | 0.29    | 0.0     | 0.35 | 0.0 | 0.99 | 1.0 |
| 0.64 | 0.8     | 0.41    | 0.6     | 0.66 | 0.8 | 0.26 | 0.4 |
| 0.17 | 0.7     | 0.60    | 1.1     | 0.00 | 1.7 | 0.28 | 1.3 |
| 0.27 | 25.7    | 0.36    | 8.3     | 0.39 | 0.3 | 0.43 | 0.3 |
| 0.71 | 1.6     | 0.53    | 3.6     | 0.60 | 2.2 | 0.63 | 0.6 |
| 0.14 | 0.5     | 0.57    | 1.2     | 0.10 | 2.2 | 0.15 | 2.0 |
| 0.95 | 1.0     | 0.90    | 0.9     | 0.85 | 0.9 | 0.28 | 1.3 |
| 0.06 | 1.9     | 0.13    | 1.8     | 0.83 | 0.9 | 0.65 | 0.9 |
| 0.41 | #DIV/0! | #DIV/0! | #DIV/0! | 0.35 | 0.0 | 0.41 | 0.0 |
| 0.08 | 1.7     | 0.45    | 0.7     | 0.04 | 0.4 | 0.08 | 0.6 |
| 0.46 | 0.9     | 0.71    | 1.0     | 0.30 | 1.2 | 0.81 | 1.1 |
| 0.76 | 0.8     | 0.25    | 0.3     | 0.23 | 0.4 | 0.30 | 0.4 |
| 0.24 | #DIV/0! | 0.24    | #DIV/0! | 0.64 | 1.6 | 0.39 | 2.0 |
| 0.01 | #DIV/0! | 0.13    | #DIV/0! | 0.12 | 0.4 | 0.01 | 0.1 |
| 0.48 | 1.2     | 0.11    | 1.6     | 0.30 | 1.3 | 0.49 | 0.8 |
| 0.56 | 0.9     | 0.10    | 0.5     | 0.16 | 0.5 | 0.52 | 0.8 |
| 0.12 | 1.1     | 0.34    | 1.1     | 0.65 | 1.0 | 0.64 | 0.9 |
| 0.00 | 2.2     | 0.00    | 2.8     | 0.12 | 1.3 | 0.13 | 1.4 |
| 0.97 | 1.0     | 0.34    | 1.3     | 0.39 | 1.3 | 0.79 | 0.9 |
| 0.83 | 1.0     | 0.29    | 0.7     | 0.10 | 0.7 | 0.33 | 0.9 |
| 0.54 | 1.0     | 0.83    | 1.1     | 0.95 | 1.0 | 0.60 | 1.0 |
| 0.14 | 0.3     | 0.68    | 1.3     | 0.15 | 4.7 | 0.75 | 1.6 |
| 0.68 | 0.8     | 0.61    | 0.7     | 0.95 | 1.0 | 0.35 | 0.5 |
| 0.42 | 1.3     | 0.23    | 1.8     | 0.49 | 1.3 | 0.98 | 1.0 |
| 0.92 | 1.0     | 0.79    | 0.9     | 0.84 | 0.9 | 0.22 | 0.6 |
| 0.63 | 1.3     | 0.90    | 1.1     | 0.59 | 0.8 | 0.16 | 0.5 |
| 0.57 | 1.7     | 0.28    | 2.7     | 0.48 | 1.5 | 0.57 | 1.9 |
| 0.04 | 2.9     | 0.05    | 3.3     | 0.68 | 1.1 | 0.93 | 1.0 |
| 0.19 | 1.5     | 0.16    | 1.8     | 0.50 | 1.2 | 0.96 | 1.0 |
| 0.99 | 1.0     | 0.44    | 1.3     | 0.41 | 1.3 | 0.57 | 0.9 |
| 0.28 | 1.6     | 0.08    | 2.5     | 0.26 | 1.5 | 0.82 | 0.9 |
| 0.98 | 1.0     | 0.43    | 0.5     | 0.36 | 0.5 | 0.34 | 0.4 |
| 0.17 | 1.3     | 0.14    | 1.7     | 0.29 | 1.3 | 0.03 | 1.5 |
| 0.76 | 1.2     | 0.85    | 0.9     | 0.59 | 0.8 | 0.16 | 0.4 |
| 0.05 | 1.8     | 0.01    | 1.4     | 0.26 | 0.8 | 0.54 | 0.9 |
| 0.91 | 1.1     | 0.52    | 1.4     | 0.56 | 1.3 | 0.46 | 1.5 |
| 0.51 | 1.8     | 0.37    | 3.1     | 0.53 | 1.8 | 0.32 | 1.9 |

|      |         |      |         |      |     |      |     |
|------|---------|------|---------|------|-----|------|-----|
| 0.71 | 1.3     | 0.62 | 0.7     | 0.28 | 0.5 | 0.08 | 0.2 |
| 0.94 | 1.0     | 0.58 | 1.2     | 0.57 | 1.2 | 0.44 | 0.7 |
| 0.94 | 1.0     | 0.20 | 0.8     | 0.19 | 0.8 | 0.30 | 0.9 |
| 0.81 | 0.9     | 0.55 | 1.2     | 0.44 | 1.3 | 0.84 | 0.9 |
| 0.27 | #DIV/0! | 0.41 | #DIV/0! | 0.26 | 0.1 | 0.27 | 0.0 |
| 0.16 | #DIV/0! | 0.36 | #DIV/0! | 0.18 | 0.2 | 0.33 | 0.3 |
| 0.58 | 0.9     | 0.75 | 1.0     | 0.41 | 1.1 | 0.04 | 1.4 |
| 0.61 | 0.6     | 0.58 | 0.6     | 0.84 | 0.9 | 0.77 | 1.1 |
| 0.13 | 1.7     | 0.59 | 0.9     | 0.06 | 0.5 | 0.03 | 0.4 |
| 0.94 | 1.0     | 0.42 | 1.2     | 0.37 | 1.3 | 0.43 | 0.8 |
| 0.99 | 1.0     | 0.42 | 0.6     | 0.51 | 0.6 | 0.54 | 0.6 |
| 0.65 | 1.1     | 0.33 | 1.4     | 0.38 | 1.3 | 0.96 | 1.0 |
| 0.46 | 1.7     | 0.95 | 1.0     | 0.34 | 0.6 | 0.53 | 0.7 |
| 0.06 | 1.5     | 0.96 | 1.0     | 0.25 | 0.7 | 0.27 | 0.8 |
| 0.26 | #DIV/0! | 0.20 | #DIV/0! | 0.33 | 0.2 | 0.69 | 0.6 |
| 0.67 | 1.4     | 0.18 | 0.3     | 0.19 | 0.2 | 0.43 | 0.4 |
| 0.30 | 1.2     | 0.07 | 1.5     | 0.18 | 1.3 | 0.95 | 1.0 |
| 0.87 | 1.1     | 0.10 | 0.3     | 0.25 | 0.2 | 0.24 | 0.1 |
| 0.18 | 2.2     | 0.95 | 1.1     | 0.16 | 0.5 | 0.15 | 0.4 |
| 0.21 | 1.6     | 0.21 | 1.6     | 0.92 | 1.0 | 0.12 | 1.5 |
| 0.13 | 1.5     | 0.04 | 1.7     | 0.49 | 1.1 | 0.17 | 1.4 |
| 0.24 | 1.2     | 0.29 | 1.2     | 0.99 | 1.0 | 0.59 | 1.1 |
| 0.58 | 1.5     | 0.12 | 2.7     | 0.31 | 1.8 | 0.51 | 1.5 |
| 0.52 | 1.2     | 0.21 | 1.8     | 0.36 | 1.4 | 0.76 | 1.1 |
| 0.91 | 1.1     | 0.53 | 0.8     | 0.71 | 0.7 | 0.65 | 0.6 |
| 0.16 | 2.1     | 0.01 | 2.3     | 0.80 | 1.1 | 1.00 | 1.0 |
| 0.58 | 0.9     | 0.14 | 0.8     | 0.21 | 0.9 | 0.78 | 1.0 |
| 0.98 | 1.0     | 0.01 | 5.3     | 0.01 | 5.2 | 0.02 | 7.5 |
| 0.75 | 0.6     | 0.37 | 0.1     | 0.36 | 0.2 | 0.29 | 0.0 |
| 0.10 | #DIV/0! | 0.41 | #DIV/0! | 0.29 | 0.3 | 0.20 | 0.2 |
| 0.71 | 0.8     | 0.73 | 1.1     | 0.44 | 1.3 | 0.91 | 0.9 |
| 0.74 | 1.1     | 0.10 | 1.4     | 0.40 | 1.2 | 0.68 | 0.9 |
| 0.42 | 1.6     | 0.00 | 2.8     | 0.07 | 1.8 | 0.13 | 1.9 |
| 0.32 | 1.7     | 0.67 | 0.8     | 0.16 | 0.5 | 0.60 | 0.8 |
| 0.96 | 1.0     | 0.23 | 0.8     | 0.38 | 0.8 | 0.44 | 1.2 |
| 0.43 | 1.6     | 0.88 | 1.2     | 0.60 | 0.7 | 0.29 | 1.5 |
| 0.39 | 1.3     | 0.88 | 0.9     | 0.45 | 0.7 | 0.90 | 1.1 |
| 0.88 | 1.0     | 0.80 | 1.0     | 0.88 | 1.0 | 0.16 | 1.2 |
| 0.14 | 1.6     | 0.03 | 2.4     | 0.17 | 1.5 | 0.11 | 1.6 |
| 0.38 | 0.5     | 0.74 | 0.8     | 0.23 | 1.6 | 0.04 | 1.7 |
| 0.08 | 2.3     | 0.11 | 4.2     | 0.28 | 1.8 | 0.02 | 2.0 |
| 0.14 | 11.3    | 0.29 | 0.0     | 0.07 | 0.0 | 0.58 | 0.6 |
| 0.03 | 3.6     | 0.90 | 1.2     | 0.09 | 0.3 | 0.04 | 1.9 |
| 0.14 | 2.5     | 0.58 | 1.4     | 0.27 | 0.6 | 0.23 | 0.5 |
| 0.23 | #DIV/0! | 0.41 | #DIV/0! | 0.30 | 0.2 | 0.55 | 2.0 |
| 0.13 | 1.6     | 0.21 | 1.5     | 0.80 | 0.9 | 0.65 | 0.9 |
| 0.05 | 2.3     | 0.11 | 4.1     | 0.30 | 1.7 | 0.03 | 1.6 |
| 0.14 | 45.1    | 0.15 | 23.3    | 0.43 | 0.5 | 0.77 | 0.8 |
| 0.69 | 1.1     | 0.21 | 1.4     | 0.16 | 1.3 | 0.55 | 0.9 |
| 0.07 | 7.3     | 0.29 | 0.0     | 0.02 | 0.0 | 0.27 | 0.5 |
| 0.18 | 1.4     | 0.73 | 0.9     | 0.05 | 0.7 | 0.17 | 0.8 |
| 0.29 | 1.5     | 0.13 | 2.5     | 0.24 | 1.7 | 0.22 | 1.5 |



|      |         |      |         |      |     |      |     |
|------|---------|------|---------|------|-----|------|-----|
| 0.26 | 1.5     | 0.54 | 1.3     | 0.84 | 0.9 | 0.80 | 1.1 |
| 0.13 | 2.0     | 0.04 | 3.4     | 0.19 | 1.7 | 0.10 | 2.0 |
| 0.15 | 1.3     | 0.60 | 0.9     | 0.03 | 0.7 | 0.04 | 0.7 |
| 0.23 | 1.5     | 0.25 | 1.4     | 0.66 | 0.9 | 0.60 | 0.8 |
| 0.51 | 1.3     | 0.62 | 1.4     | 0.94 | 1.0 | 0.37 | 1.4 |
| 0.74 | 1.3     | 0.16 | 0.2     | 0.13 | 0.1 | 0.20 | 0.2 |
| 0.48 | 0.5     | 0.23 | 0.3     | 0.48 | 0.5 | 0.83 | 1.2 |
| 0.06 | 3.5     | 0.35 | 1.8     | 0.14 | 0.5 | 0.10 | 0.4 |
| 0.45 | 1.3     | 0.07 | 1.7     | 0.40 | 1.3 | 0.77 | 0.9 |
| 0.44 | 1.7     | 0.04 | 2.2     | 0.53 | 1.3 | 0.93 | 1.0 |
| 0.66 | 1.7     | 0.84 | 1.2     | 0.74 | 0.7 | 0.73 | 1.3 |
| 0.01 | 2.4     | 0.12 | 1.8     | 0.27 | 0.8 | 0.19 | 0.7 |
| 0.95 | 1.0     | 0.08 | 2.7     | 0.04 | 2.8 | 0.12 | 2.0 |
| 0.57 | 0.7     | 0.56 | 1.3     | 0.26 | 1.9 | 0.51 | 0.4 |
| 0.93 | 1.0     | 0.13 | 0.4     | 0.06 | 0.4 | 0.59 | 1.3 |
| 0.82 | 0.9     | 0.21 | 1.6     | 0.07 | 1.7 | 0.39 | 1.3 |
| 0.78 | 1.2     | 0.15 | 2.6     | 0.12 | 2.2 | 0.44 | 1.4 |
| 0.56 | 0.6     | 0.95 | 1.0     | 0.41 | 1.6 | 0.33 | 2.2 |
| 0.51 | 2.3     | 0.30 | 4.9     | 0.45 | 2.2 | 0.47 | 0.4 |
| 0.07 | 0.7     | 0.79 | 0.9     | 0.73 | 1.2 | 0.86 | 1.1 |
| 0.77 | 0.9     | 0.68 | 1.1     | 0.51 | 1.2 | 0.99 | 1.0 |
| 0.09 | 1.2     | 0.57 | 1.2     | 0.99 | 1.0 | 0.77 | 0.9 |
| 0.93 | 0.9     | 0.33 | 3.8     | 0.26 | 4.0 | 0.17 | 0.2 |
| 0.57 | 0.8     | 0.42 | 1.4     | 0.23 | 1.7 | 0.98 | 1.0 |
| 0.03 | 1.2     | 0.11 | 1.3     | 0.64 | 1.1 | 0.44 | 0.8 |
| 0.07 | 1.4     | 0.68 | 1.2     | 0.60 | 0.8 | 0.28 | 0.7 |
| 0.93 | 1.0     | 0.57 | 1.3     | 0.54 | 1.3 | 0.66 | 0.8 |
| 0.23 | 1.6     | 0.26 | 1.6     | 0.98 | 1.0 | 0.12 | 0.6 |
| 0.83 | 0.9     | 0.22 | 2.1     | 0.18 | 2.3 | 1.00 | 1.0 |
| 0.82 | 1.0     | 0.11 | 1.4     | 0.12 | 1.3 | 0.27 | 1.2 |
| 0.59 | 1.4     | 0.69 | 1.3     | 0.95 | 1.0 | 0.26 | 1.4 |
| 0.54 | 0.6     | 0.48 | 0.6     | 0.88 | 0.9 | 0.99 | 1.0 |
| 0.31 | 1.3     | 0.51 | 1.6     | 0.74 | 1.2 | 0.67 | 0.9 |
| 0.31 | 0.7     | 0.87 | 0.9     | 0.58 | 1.3 | 0.99 | 1.0 |
| 0.82 | 1.1     | 0.59 | 1.6     | 0.60 | 1.5 | 0.86 | 0.9 |
| 0.27 | #DIV/0! | 0.41 | #DIV/0! | 0.86 | 1.3 | 0.81 | 0.7 |
| 0.37 | 2.2     | 0.89 | 0.8     | 0.34 | 0.4 | 0.49 | 0.5 |
| 0.81 | 0.9     | 0.05 | 0.1     | 0.01 | 0.1 | 0.08 | 0.3 |
| 0.06 | 2.0     | 0.21 | 1.9     | 0.85 | 0.9 | 0.75 | 0.9 |
| 0.30 | 6.1     | 0.45 | 4.2     | 0.72 | 0.7 | 0.36 | 2.2 |
| 0.24 | 1.7     | 0.73 | 0.8     | 0.14 | 0.5 | 0.50 | 0.7 |
| 0.05 | 1.1     | 0.89 | 1.0     | 0.25 | 0.8 | 0.01 | 0.7 |
| 0.76 | 0.9     | 0.22 | 1.7     | 0.16 | 1.8 | 0.15 | 1.5 |
| 0.72 | 1.8     | 0.26 | 14.6    | 0.24 | 7.9 | 0.61 | 0.4 |
| 0.14 | 1.3     | 0.87 | 1.1     | 0.56 | 0.8 | 0.32 | 0.8 |
| 0.98 | 1.0     | 0.58 | 1.1     | 0.70 | 1.1 | 0.66 | 1.1 |
| 0.68 | 1.1     | 0.94 | 1.0     | 0.84 | 0.9 | 0.22 | 0.6 |
| 0.62 | 0.8     | 0.23 | 0.5     | 0.24 | 0.6 | 0.60 | 0.8 |
| 0.70 | 1.2     | 0.27 | 0.4     | 0.17 | 0.3 | 0.39 | 0.6 |
| 0.25 | 1.6     | 0.77 | 1.1     | 0.34 | 0.7 | 0.11 | 0.4 |
| 0.02 | 1.6     | 0.54 | 0.7     | 0.04 | 0.4 | 0.06 | 0.6 |
| 0.25 | 2.2     | 0.98 | 1.0     | 0.18 | 0.4 | 0.43 | 0.7 |

|      |         |      |         |      |      |      |      |
|------|---------|------|---------|------|------|------|------|
| 0.26 | 1.6     | 0.54 | 1.3     | 0.56 | 0.8  | 0.38 | 0.7  |
| 0.00 | 1.6     | 0.79 | 1.2     | 0.41 | 0.7  | 0.14 | 0.7  |
| 0.25 | 1.4     | 0.02 | 2.6     | 0.04 | 1.9  | 0.63 | 0.8  |
| 0.32 | 1.5     | 0.57 | 0.7     | 0.09 | 0.5  | 0.49 | 0.7  |
| 0.02 | 5.2     | 0.35 | 6.7     | 0.77 | 1.3  | 0.20 | 0.4  |
| 0.81 | 1.1     | 0.76 | 0.8     | 0.58 | 0.7  | 0.47 | 0.7  |
| 0.94 | 1.0     | 0.69 | 0.9     | 0.70 | 0.8  | 0.23 | 0.5  |
| 0.85 | 1.1     | 0.88 | 0.9     | 0.76 | 0.9  | 0.17 | 0.6  |
| 0.75 | 0.8     | 0.15 | 0.3     | 0.27 | 0.4  | 0.26 | 0.3  |
| 0.02 | 0.7     | 0.72 | 1.1     | 0.24 | 1.6  | 0.36 | 0.9  |
| 0.13 | 0.5     | 0.74 | 1.2     | 0.23 | 2.4  | 0.32 | 1.7  |
| 0.15 | 1.4     | 0.66 | 0.9     | 0.10 | 0.6  | 0.07 | 0.6  |
| 0.66 | 0.9     | 0.74 | 1.0     | 0.73 | 1.1  | 1.00 | 1.0  |
| 0.06 | 2.1     | 0.09 | 3.0     | 0.40 | 1.4  | 0.29 | 1.4  |
| 0.48 | 1.6     | 0.34 | 2.6     | 0.55 | 1.5  | 1.00 | 1.0  |
| 0.47 | 1.2     | 0.21 | 1.3     | 0.56 | 1.1  | 0.31 | 0.8  |
| 0.28 | 1.5     | 0.29 | 1.7     | 0.72 | 1.1  | 0.09 | 0.5  |
| 0.34 | 2.2     | 0.87 | 0.9     | 0.22 | 0.4  | 0.22 | 0.3  |
| 0.22 | 1.2     | 0.19 | 1.2     | 0.74 | 1.0  | 0.68 | 0.9  |
| 0.14 | 4.0     | 0.13 | 2.6     | 0.42 | 0.6  | 0.37 | 0.5  |
| 0.66 | 0.9     | 0.40 | 0.7     | 0.47 | 0.7  | 0.45 | 0.8  |
| 0.21 | 1.4     | 0.10 | 0.4     | 0.01 | 0.3  | 0.07 | 0.5  |
| 0.29 | 0.8     | 0.05 | 0.4     | 0.09 | 0.5  | 0.43 | 1.4  |
| 0.74 | 1.1     | 0.74 | 0.8     | 0.58 | 0.7  | 0.41 | 0.7  |
| 0.07 | #DIV/0! | 0.28 | #DIV/0! | 0.65 | 0.7  | 0.26 | 0.4  |
| 0.18 | 1.2     | 0.01 | 1.4     | 0.08 | 1.2  | 0.19 | 1.2  |
| 0.44 | 1.1     | 0.11 | 0.8     | 0.04 | 0.7  | 0.00 | 0.7  |
| 0.23 | 1.4     | 0.26 | 1.3     | 0.73 | 1.0  | 0.78 | 1.0  |
| 0.21 | 1.9     | 0.21 | 0.2     | 0.00 | 0.1  | 0.01 | 0.2  |
| 0.23 | 1.2     | 0.40 | 1.1     | 0.54 | 0.9  | 0.04 | 0.7  |
| 0.18 | 1.6     | 0.43 | 1.3     | 0.46 | 0.8  | 0.38 | 0.7  |
| 0.45 | 0.3     | 0.29 | 0.0     | 0.35 | 0.0  | 0.30 | 14.8 |
| 0.36 | 1.2     | 0.85 | 0.9     | 0.38 | 0.8  | 0.42 | 0.8  |
| 0.92 | 1.0     | 0.09 | 0.5     | 0.07 | 0.5  | 0.12 | 0.7  |
| 0.57 | 0.4     | 0.33 | 4.7     | 0.20 | 10.7 | 0.95 | 0.9  |
| 0.89 | 1.0     | 0.34 | 0.6     | 0.18 | 0.6  | 0.46 | 0.7  |
| 0.82 | 1.1     | 0.03 | 0.1     | 0.07 | 0.1  | 0.94 | 0.9  |
| 0.67 | 1.5     | 0.58 | 1.7     | 0.77 | 1.2  | 0.91 | 0.9  |
| 0.29 | 0.7     | 0.12 | 0.4     | 0.34 | 0.6  | 0.13 | 0.4  |
| 0.47 | 0.7     | 0.60 | 0.8     | 0.83 | 1.2  | 0.83 | 1.3  |
| 0.89 | 1.1     | 0.99 | 1.0     | 0.91 | 0.9  | 0.81 | 0.9  |
| 0.34 | 0.7     | 0.23 | 0.4     | 0.53 | 0.6  | 0.29 | 0.4  |
| 0.58 | 0.8     | 0.24 | 0.5     | 0.46 | 0.7  | 0.05 | 0.1  |
| 0.10 | 0.4     | 0.10 | 0.4     | 0.81 | 1.1  | 0.34 | 2.0  |
| 0.08 | 1.9     | 0.05 | 1.9     | 1.00 | 1.0  | 0.46 | 1.3  |
| 0.66 | 0.5     | 0.24 | 3.2     | 0.09 | 6.1  | 0.09 | 6.0  |
| 0.75 | 1.2     | 0.26 | 0.4     | 0.06 | 0.3  | 0.15 | 0.4  |
| 0.02 | 1.4     | 0.15 | 1.4     | 0.82 | 1.0  | 0.85 | 1.0  |
| 0.84 | 1.1     | 0.37 | 0.6     | 0.28 | 0.5  | 0.16 | 0.3  |
| 0.38 | 1.1     | 0.40 | 0.7     | 0.19 | 0.6  | 0.55 | 0.8  |
| 0.80 | 0.9     | 0.35 | 0.7     | 0.43 | 0.8  | 0.54 | 0.8  |
| 0.47 | 0.5     | 0.09 | 0.0     | 0.19 | 0.0  | 0.65 | 1.9  |

|      |         |         |         |      |      |      |     |
|------|---------|---------|---------|------|------|------|-----|
| 0.16 | 0.6     | 0.02    | 0.2     | 0.12 | 0.4  | 0.37 | 1.4 |
| 0.15 | 1.5     | 0.58    | 0.6     | 0.18 | 0.4  | 0.25 | 0.7 |
| 0.04 | 1.5     | 0.09    | 1.3     | 0.23 | 0.9  | 0.17 | 0.7 |
| 0.02 | 1.5     | 0.20    | 1.6     | 0.92 | 1.0  | 0.33 | 1.1 |
| 0.69 | 1.1     | 0.23    | 1.1     | 0.78 | 1.0  | 0.97 | 1.0 |
| 0.14 | 3.0     | 0.03    | 3.6     | 0.62 | 1.2  | 0.29 | 1.6 |
| 0.19 | 2.1     | 0.19    | 2.4     | 0.76 | 1.1  | 0.41 | 1.3 |
| 0.13 | 1.3     | 0.68    | 1.1     | 0.34 | 0.8  | 0.84 | 1.0 |
| 0.46 | 1.5     | 0.54    | 1.7     | 0.89 | 1.1  | 0.54 | 1.3 |
| 0.47 | 1.1     | 0.37    | 0.8     | 0.09 | 0.7  | 0.48 | 0.9 |
| 0.36 | #DIV/0! | #DIV/0! | #DIV/0! | 0.30 | 0.0  | 0.36 | 0.0 |
| 0.81 | 0.9     | 0.03    | 0.1     | 0.02 | 0.1  | 0.51 | 1.9 |
| 0.35 | #DIV/0! | #DIV/0! | #DIV/0! | 0.29 | 0.0  | 0.35 | 0.0 |
| 0.05 | 2.0     | 0.08    | 1.7     | 0.36 | 0.8  | 0.31 | 0.7 |
| 0.54 | 0.8     | 0.82    | 1.0     | 0.49 | 1.2  | 0.62 | 0.7 |
| 0.20 | 0.4     | 0.30    | 0.5     | 0.84 | 1.2  | 0.25 | 0.3 |
| 0.19 | #DIV/0! | 0.19    | #DIV/0! | 0.33 | 3.0  | 0.19 | 0.0 |
| 0.01 | 0.3     | 0.86    | 1.0     | 0.00 | 3.6  | 0.30 | 1.7 |
| 0.40 | 0.7     | 0.08    | 3.2     | 0.03 | 4.8  | 0.61 | 1.9 |
| 0.67 | 0.9     | 0.15    | 0.4     | 0.25 | 0.4  | 0.06 | 0.2 |
| 0.82 | 0.8     | 0.96    | 1.1     | 0.84 | 1.3  | 0.51 | 0.5 |
| 0.02 | 0.3     | 0.13    | 0.5     | 0.59 | 1.5  | 0.95 | 0.9 |
| 0.67 | 1.3     | 0.03    | 5.3     | 0.02 | 4.1  | 0.39 | 2.0 |
| 0.19 | 0.7     | 0.61    | 0.7     | 0.95 | 1.0  | 0.03 | 0.4 |
| 0.41 | #DIV/0! | 0.41    | #DIV/0! | 0.97 | 1.1  | 1.00 | 1.0 |
| 0.34 | #DIV/0! | 0.32    | #DIV/0! | 0.40 | 0.2  | 0.70 | 0.6 |
| 0.76 | 1.1     | 0.96    | 0.9     | 0.83 | 0.8  | 0.03 | 0.1 |
| 0.83 | 0.9     | 0.60    | 0.7     | 0.69 | 0.8  | 0.09 | 0.3 |
| 0.10 | 0.5     | 0.99    | 1.0     | 0.32 | 1.9  | 0.01 | 0.4 |
| 0.61 | 1.5     | 0.30    | 0.1     | 0.03 | 0.1  | 0.91 | 1.1 |
| 0.24 | 0.8     | 0.17    | 0.5     | 0.35 | 0.7  | 0.12 | 0.8 |
| 0.12 | 0.6     | 0.67    | 0.8     | 0.32 | 1.5  | 0.06 | 0.4 |
| 0.17 | 0.5     | 0.58    | 0.7     | 0.56 | 1.5  | 0.92 | 0.9 |
| 0.05 | 0.5     | 0.63    | 1.2     | 0.05 | 2.6  | 0.59 | 1.5 |
| 0.01 | 0.4     | 0.86    | 1.1     | 0.04 | 2.7  | 0.71 | 0.9 |
| 0.60 | 1.5     | 0.42    | 2.2     | 0.60 | 1.5  | 0.20 | 2.0 |
| 0.32 | 1.2     | 0.79    | 0.9     | 0.40 | 0.7  | 0.50 | 0.9 |
| 0.23 | 6.8     | 0.46    | 8.7     | 0.85 | 1.3  | 0.60 | 0.6 |
| 0.37 | 0.8     | 0.80    | 0.9     | 0.73 | 1.2  | 0.88 | 0.9 |
| 0.17 | 0.6     | 0.08    | 0.4     | 0.50 | 0.7  | 0.91 | 1.0 |
| 0.18 | 0.8     | 0.30    | 0.8     | 0.79 | 0.9  | 0.25 | 0.9 |
| 0.10 | 0.5     | 0.00    | 0.1     | 0.17 | 0.2  | 0.42 | 1.8 |
| 0.21 | 0.5     | 0.40    | 0.6     | 0.79 | 1.2  | 0.34 | 1.6 |
| 0.41 | #DIV/0! | 0.41    | #DIV/0! | 0.38 | 14.3 | 0.75 | 1.6 |
| 0.05 | 8.9     | 0.42    | 4.0     | 0.26 | 0.4  | 0.38 | 0.5 |
| 0.91 | 1.1     | 0.79    | 0.7     | 0.49 | 0.7  | 0.48 | 2.0 |
| 0.41 | #DIV/0! | 0.08    | #DIV/0! | 0.07 | 14.5 | 0.36 | 7.5 |
| 0.41 | #DIV/0! | #DIV/0! | #DIV/0! | 0.35 | 0.0  | 0.41 | 0.0 |
| 0.41 | #DIV/0! | 0.12    | #DIV/0! | 0.12 | 7.9  | 0.21 | 4.5 |
| 0.47 | 4.6     | 0.74    | 1.7     | 0.54 | 0.4  | 0.66 | 1.6 |
| 0.79 | 1.1     | 0.98    | 1.0     | 0.87 | 0.9  | 0.76 | 0.9 |
| 0.31 | 0.1     | 0.91    | 1.1     | 0.18 | 12.1 | 0.42 | 4.7 |



| pvalue 24v34 | FC 24v34 | pvalue 4v34 | FC 4v34 |
|--------------|----------|-------------|---------|
| 0.72         | 1.2      | 0.81        | 1.1     |
| 0.05         | 0.5      | 0.12        | 0.2     |
| 0.95         | 1.0      | 0.44        | 1.3     |
| 0.49         | 0.7      | 0.10        | 0.3     |
| 0.62         | 0.8      | 0.03        | 4.1     |
| 0.09         | 1.6      | 0.19        | 1.6     |
| 0.94         | 1.0      | 0.07        | 0.3     |
| 0.00         | 0.0      | 0.05        | 0.0     |
| 0.53         | 1.2      | 0.06        | 2.2     |
| 0.34         | 8.6      | 0.34        | 418.7   |
| 0.58         | 0.5      | 0.52        | 0.4     |
| #DIV/0!      | #DIV/0!  | #DIV/0!     | 0       |
| 0.19         | 0.2      | 0.44        | 0.4     |
| 0.20         | 0.3      | 0.28        | 0.3     |
| 0.73         | 1.1      | 0.86        | 1.0     |
| 0.48         | 1.1      | 0.59        | 0.9     |
| 0.08         | 0.1      | 0.05        | 0.1     |
| 0.77         | 0.9      | 0.86        | 0.9     |
| 0.68         | 0.8      | 0.13        | 0.3     |
| 0.13         | 0.6      | 0.43        | 0.6     |
| 0.02         | 1.8      | 0.01        | 3.1     |
| 0.80         | 1.1      | 0.45        | 0.6     |
| 0.67         | 0.7      | 0.07        | 28.1    |
| 0.58         | 1.9      | 0.91        | 0.9     |
| 0.09         | 5.4      | 0.06        | 44.6    |
| 0.21         | 0.5      | 0.47        | 1.7     |
| 0.88         | 0.9      | 0.22        | 0.6     |
| 0.89         | 0.9      | 0.10        | 0.5     |
| 0.35         | 0.8      | 0.22        | 0.6     |
| 0.58         | 1.1      | 0.24        | 1.2     |
| 0.94         | 1.0      | 0.70        | 1.2     |
| 0.28         | 0.4      | 0.54        | 0.8     |
| 0.49         | 0.6      | 0.51        | 0.7     |
| 0.66         | 1.3      | 0.36        | 1.4     |
| 0.35         | 2.3      | 0.31        | 3.4     |
| 0.21         | 0.0      | 0.27        | 0.0     |
| 0.10         | 0.2      | 0.41        | 0.5     |
| 0.52         | 0.8      | 0.15        | 2.6     |
| 0.19         | 0.7      | 0.36        | 0.7     |
| 0.44         | 2.2      | 0.19        | 167.6   |
| 0.59         | 1.4      | 0.71        | 1.2     |
| 0.97         | 1.0      | 0.15        | 0.3     |
| 0.00         | 0.1      | 0.02        | 0.1     |
| 1.00         | 1.0      | 1.00        | 1.0     |
| 0.94         | 1.1      | 0.54        | 1.9     |
| 0.51         | 0.6      | 0.98        | 1.0     |
| 0.57         | 1.3      | 0.72        | 1.2     |
| 0.45         | 2.0      | 0.72        | 1.4     |
| 0.15         | 0.1      | 0.04        | 0.1     |
| 0.77         | 0.8      | 0.47        | 0.7     |
| 0.57         | 1.5      | 0.31        | 3.3     |

|      |         |         |       |
|------|---------|---------|-------|
| 0.58 | 1.3     | 0.22    | 2.8   |
| 0.79 | 0.9     | 0.23    | 0.6   |
| 0.21 | 0.7     | 0.20    | 0.7   |
| 0.84 | 0.9     | 0.67    | 0.9   |
| 0.26 | 0.5     | 0.02    | 0.5   |
| 0.69 | 0.7     | 0.21    | 2.0   |
| 0.13 | 0.2     | 0.13    | 0.2   |
| 0.02 | 0.2     | 0.03    | 0.2   |
| 0.82 | 1.2     | 0.36    | 2.7   |
| 0.61 | 1.5     | 0.93    | 0.9   |
| 0.41 | 2.3     | 0.28    | 4.6   |
| 0.77 | 1.3     | 0.21    | 9.7   |
| 0.42 | 1.9     | 0.17    | 4.8   |
| 0.72 | 1.0     | 0.00    | 2.6   |
| 0.31 | 0.3     | 0.48    | 2.4   |
| 0.26 | 0.7     | 0.04    | 2.3   |
| 0.48 | 0.8     | 0.00    | 3.6   |
| 0.02 | 0.3     | 0.11    | 0.6   |
| 0.32 | 0.6     | 0.07    | 0.1   |
| 0.41 | 0.0     | #DIV/0! | 0     |
| 0.37 | 1.6     | 0.02    | 73.6  |
| 0.29 | #DIV/0! | 0.10    | 0.1   |
| 0.29 | #DIV/0! | 0.36    | 14.1  |
| 0.64 | 0.7     | 0.33    | 2.7   |
| 0.00 | 2.9     | 0.00    | 435.8 |
| 0.53 | 1.1     | 0.002   | 1.5   |
| 0.41 | 0.0     | 0.36    | 0.0   |
| 0.75 | 0.8     | 0.12    | 25.8  |
| 0.24 | 0.6     | 0.36    | 2.0   |
| 0.02 | 0.1     | 0.19    | 0.1   |
| 0.43 | 0.6     | 0.20    | 2.9   |
| 0.25 | 0.0     | #DIV/0! | 0     |
| 0.29 | #DIV/0! | 0.36    | 2.2   |
| 0.42 | 0.7     | 0.38    | 1.6   |
| 0.29 | #DIV/0! | 0.14    | 0.0   |
| 0.35 | 0.6     | 0.01    | 0.2   |
| 0.28 | 0.8     | 0.20    | 0.7   |
| 0.48 | 0.8     | 0.22    | 1.4   |
| 0.27 | 2.0     | 0.18    | 3.3   |
| 0.38 | 1.1     | 0.20    | 1.3   |
| 0.66 | 1.5     | 0.17    | 13.0  |
| 0.11 | 1.4     | 0.01    | 3.0   |
| 0.05 | 1.5     | 0.26    | 1.5   |
| 0.15 | 1.4     | 0.00    | 4.9   |
| 0.23 | 11.6    | 0.26    | 52.6  |
| 0.09 | 12.7    | 0.64    | 0.7   |
| 0.30 | 0.1     | 0.09    | 0.1   |
| 0.02 | #DIV/0! | 0.88    | 1.1   |
| 0.03 | 0.3     | 0.16    | 0.3   |
| 0.10 | #DIV/0! | 0.34    | 0.3   |
| 0.34 | 0.5     | 0.53    | 0.5   |
| 0.40 | 1.2     | 0.00    | 7.5   |

|         |         |         |        |
|---------|---------|---------|--------|
| 0.28    | 1.9     | 0.08    | 6.3    |
| 0.86    | 1.2     | 0.80    | 1.3    |
| 0.70    | 0.8     | 0.42    | 1.7    |
| #DIV/0! | #DIV/0! | 0.36    | 0.0    |
| 0.23    | 0.6     | 1.00    | 1.0    |
| 0.90    | 1.1     | 0.38    | 1.8    |
| 0.49    | 0.5     | 0.81    | 1.2    |
| 0.83    | 0.9     | 0.05    | 2.1    |
| 0.65    | 0.7     | 0.62    | 2.1    |
| 0.23    | 2.7     | 0.47    | 1.6    |
| 0.83    | 1.2     | 0.79    | 1.2    |
| 0.88    | 1.1     | 0.45    | 2.1    |
| 0.28    | 3.0     | 0.34    | 3.0    |
| 0.03    | 0.4     | 0.64    | 0.8    |
| 0.48    | 1.5     | 0.87    | 1.1    |
| 0.07    | 0.6     | 0.05    | 0.5    |
| 0.84    | 0.7     | 0.55    | 0.4    |
| 0.59    | 2.2     | 0.33    | 45.6   |
| 0.72    | 0.9     | 0.10    | 0.4    |
| 0.27    | 0.2     | 0.03    | 0.2    |
| 0.89    | 1.0     | 0.93    | 1.0    |
| 0.44    | 1.7     | 0.85    | 0.9    |
| 0.96    | 1.0     | 0.85    | 0.9    |
| 0.41    | 0.0     | #DIV/0! | 0      |
| 0.55    | 1.4     | 0.45    | 1.5    |
| 0.99    | 1.0     | 0.36    | 100.1  |
| 0.80    | 0.7     | 0.64    | 0.6    |
| 0.27    | 1.6     | 0.07    | 3.4    |
| 0.74    | 1.4     | 0.25    | 100.0  |
| 0.21    | 10.4    | 0.99    | 1.0    |
| 0.17    | 1.4     | 0.24    | 1.3    |
| 0.48    | 0.7     | 0.42    | 0.6    |
| 0.76    | 1.5     | 0.34    | 0.3    |
| 0.61    | 0.4     | 0.21    | 13.1   |
| 0.28    | 4.4     | 0.20    | 1214.0 |
| 0.49    | 0.7     | 0.02    | 0.4    |
| 0.26    | 3.3     | 0.25    | 5.9    |
| 0.95    | 0.9     | 0.96    | 0.9    |
| 0.66    | 0.5     | 0.36    | 13.2   |
| 0.47    | 1.5     | 0.13    | 5.8    |
| 0.05    | 0.3     | 0.04    | 0.2    |
| 0.24    | 2.6     | 0.30    | 2.7    |
| 0.98    | 1.0     | 0.10    | 2.0    |
| 0.00    | 3.2     | 0.00    | 5.8    |
| 0.28    | 1.4     | 0.81    | 1.1    |
| 0.26    | 0.4     | 0.47    | 0.4    |
| 0.41    | 0.0     | 0.03    | 0.0    |
| 0.49    | 1.9     | 0.59    | 0.7    |
| 0.42    | 0.6     | 0.30    | 0.5    |
| #DIV/0! | #DIV/0! | 0.02    | 0.0    |
| 0.70    | 1.2     | 0.41    | 1.4    |
| 0.63    | 0.9     | 0.92    | 1.0    |

|      |         |         |      |
|------|---------|---------|------|
| 0.53 | 1.7     | 0.58    | 1.6  |
| 0.51 | 0.6     | 0.34    | 3.1  |
| 0.47 | 1.5     | 0.41    | 1.5  |
| 0.29 | #DIV/0! | 0.36    | 13.0 |
| 0.37 | 2.1     | 0.14    | 0.5  |
| 0.21 | 0.5     | 0.25    | 0.3  |
| 0.27 | 0.0     | #DIV/0! | 0    |
| 0.18 | 0.2     | 0.20    | 0.1  |
| 0.14 | 0.4     | 0.31    | 4.5  |
| 0.29 | #DIV/0! | 0.45    | 0.2  |
| 0.52 | 1.2     | 0.38    | 1.4  |
| 0.03 | 3.1     | 0.74    | 1.1  |
| 0.31 | 2.0     | 0.35    | 2.0  |
| 0.60 | 1.1     | 0.11    | 1.7  |
| 0.19 | 2.3     | 0.98    | 1.0  |
| 0.91 | 1.1     | 0.97    | 1.0  |
| 0.82 | 0.9     | 0.38    | 0.6  |
| 0.97 | 1.0     | 0.06    | 6.8  |
| 0.06 | 2.1     | 0.00    | 99.6 |
| 0.35 | 2.1     | 0.92    | 1.0  |
| 0.33 | 0.0     | #DIV/0! | 0    |
| 0.20 | 0.0     | 0.16    | 0.0  |
| 0.61 | 0.8     | 0.12    | 0.4  |
| 0.52 | 1.3     | 0.97    | 1.0  |
| 0.38 | 2.2     | 0.82    | 0.9  |
| 0.78 | 1.1     | 0.57    | 0.7  |
| 0.90 | 1.0     | 0.04    | 10.2 |
| 0.15 | 1.8     | 0.01    | 4.7  |
| 0.27 | 0.7     | 0.00    | 4.9  |
| 0.48 | 0.4     | 0.98    | 1.0  |
| 0.35 | 0.2     | 0.45    | 0.3  |
| 0.84 | 0.8     | 0.60    | 1.9  |
| 0.99 | 1.0     | 0.05    | 0.2  |
| 0.19 | 1.2     | 0.01    | 2.0  |
| 0.95 | 0.9     | 0.18    | 0.1  |
| 0.32 | 0.8     | 0.03    | 2.9  |
| 0.11 | 0.6     | 0.02    | 0.3  |
| 0.45 | 0.9     | 0.82    | 1.0  |
| 0.13 | 0.4     | 0.01    | 0.1  |
| 0.37 | 0.8     | 0.96    | 1.0  |
| 0.08 | 0.5     | 0.00    | 0.2  |
| 0.57 | 1.3     | 0.01    | 5.0  |
| 0.61 | 1.3     | 0.24    | 2.4  |
| 0.83 | 1.3     | 0.19    | 9.2  |
| 0.41 | 0.0     | 0.36    | 0.0  |
| 0.19 | 1.3     | 0.01    | 2.7  |
| 0.38 | 1.6     | 0.25    | 1.9  |
| 0.80 | 1.1     | 0.01    | 2.7  |
| 0.64 | 1.1     | 0.08    | 0.5  |
| 0.20 | 2.8     | 0.65    | 0.7  |
| 0.33 | 3.8     | 0.78    | 1.4  |
| 0.16 | 1.2     | 0.07    | 1.3  |



|         |         |      |       |
|---------|---------|------|-------|
| 0.19    | #DIV/0! | 0.24 | 32.3  |
| 0.84    | 0.9     | 0.29 | 0.7   |
| 0.20    | 2.0     | 0.18 | 2.2   |
| 0.48    | 0.1     | 0.36 | 0.9   |
| 0.35    | 1.4     | 0.26 | 2.0   |
| 0.29    | #DIV/0! | 0.36 | 38.0  |
| 0.31    | 1.9     | 0.48 | 1.5   |
| 0.99    | 1.0     | 0.05 | 2.7   |
| 0.82    | 1.0     | 0.07 | 1.6   |
| 0.02    | 0.1     | 0.36 | 0.2   |
| 0.03    | 8.9     | 0.38 | 1.8   |
| 0.23    | 0.6     | 0.12 | 3.9   |
| 0.41    | 0.0     | 0.13 | 0.0   |
| 0.63    | 1.3     | 0.20 | 0.5   |
| 0.50    | 0.5     | 0.51 | 0.8   |
| 0.90    | 1.1     | 0.76 | 1.2   |
| 0.38    | 2.7     | 0.71 | 1.3   |
| 0.64    | 1.4     | 0.31 | 3.3   |
| 0.61    | 0.9     | 0.09 | 1.4   |
| 0.61    | 1.9     | 0.39 | 10.3  |
| 0.29    | 0.2     | 0.35 | 0.3   |
| 0.20    | 2.2     | 0.35 | 1.7   |
| 0.20    | 2.5     | 0.20 | 2.4   |
| 0.03    | 1.5     | 0.00 | 3.0   |
| 0.02    | #DIV/0! | 0.20 | 2.9   |
| 0.06    | 2.4     | 0.05 | 4.1   |
| 0.30    | 36.6    | 0.87 | 0.8   |
| 0.02    | 1.9     | 0.14 | 1.7   |
| 0.78    | 0.8     | 0.87 | 1.1   |
| 0.16    | 8.1     | 0.16 | 188.9 |
| 0.32    | 0.2     | 0.13 | 0.1   |
| 0.93    | 1.0     | 0.32 | 2.4   |
| 0.38    | 2.3     | 0.17 | 3.1   |
| 0.02    | 16.6    | 0.06 | 9.2   |
| 0.13    | 2.7     | 0.05 | 8.8   |
| 0.55    | 1.2     | 0.02 | 4.9   |
| 0.27    | 1.9     | 0.37 | 1.9   |
| 0.86    | 1.1     | 0.94 | 1.0   |
| 0.75    | 0.9     | 0.04 | 63.3  |
| #DIV/0! | #DIV/0! | 0.04 | 0.0   |
| 0.49    | 0.5     | 0.20 | 3.3   |
| 0.32    | 3.9     | 0.25 | 804.1 |
| 0.11    | 1.4     | 0.19 | 1.6   |
| 0.17    | 1.3     | 0.10 | 1.7   |
| 0.52    | 1.3     | 0.18 | 2.5   |
| 0.41    | 0.4     | 0.55 | 3.0   |
| 0.02    | 0.4     | 0.00 | 0.1   |
| 0.44    | 0.1     | 0.05 | 0.3   |
| 0.47    | 1.3     | 0.52 | 0.7   |
| 0.47    | 3.5     | 0.36 | 659.2 |
| 0.32    | 2.0     | 0.24 | 0.6   |
| 0.55    | 0.6     | 0.23 | 0.7   |

|         |         |         |      |
|---------|---------|---------|------|
| 0.91    | 0.9     | 0.01    | 4.5  |
| 0.14    | 0.3     | 0.02    | 0.1  |
| #DIV/0! | #DIV/0! | 0.36    | 0.0  |
| 0.67    | 1.2     | 0.60    | 1.2  |
| 0.55    | 1.3     | 0.42    | 1.6  |
| 0.92    | 0.9     | 0.04    | 0.3  |
| 0.96    | 1.0     | 0.02    | 0.1  |
| 0.71    | 0.9     | 0.02    | 0.7  |
| 0.38    | 1.4     | 0.97    | 1.0  |
| 0.18    | 1.3     | 0.05    | 1.6  |
| 0.15    | 2.6     | 0.66    | 1.2  |
| 0.47    | 0.7     | 0.04    | 0.4  |
| 0.58    | 1.2     | 0.35    | 0.7  |
| 0.96    | 1.0     | 0.86    | 0.9  |
| 0.64    | 1.1     | 0.29    | 0.6  |
| 0.81    | 0.9     | 0.50    | 1.4  |
| 0.08    | 1.8     | 0.04    | 2.5  |
| 0.83    | 1.1     | 0.20    | 0.4  |
| 0.60    | 0.5     | 0.16    | 0.1  |
| 0.44    | 0.7     | 0.86    | 1.1  |
| 0.21    | 0.0     | 0.36    | 0.0  |
| 0.55    | 0.7     | 0.37    | 0.6  |
| 0.92    | 1.0     | 0.52    | 0.7  |
| 0.15    | 2.2     | 0.35    | 0.6  |
| 0.54    | 1.2     | 0.18    | 0.5  |
| 0.56    | 1.4     | 0.07    | 0.3  |
| 0.69    | 1.1     | 0.22    | 0.7  |
| 0.14    | 1.3     | 0.82    | 0.9  |
| 0.08    | 2.4     | 0.07    | 0.5  |
| 0.47    | 1.4     | 0.78    | 0.9  |
| 0.82    | 0.9     | 0.00    | 0.2  |
| 0.95    | 1.0     | 0.95    | 1.0  |
| 0.18    | 1.2     | 0.85    | 1.0  |
| 0.46    | 1.4     | 0.80    | 0.9  |
| 0.01    | #DIV/0! | 0.14    | 2.8  |
| 0.23    | 0.5     | 0.03    | 0.3  |
| 0.44    | 0.6     | 0.44    | 0.5  |
| 0.41    | 0.0     | 0.18    | 0.0  |
| 0.41    | 0.0     | #DIV/0! | 0    |
| #DIV/0! | #DIV/0! | 0.36    | 0.0  |
| 0.37    | 1.2     | 0.43    | 0.9  |
| 0.29    | 0.6     | 0.42    | 0.5  |
| 0.59    | 0.8     | 0.20    | 0.6  |
| 0.25    | 0.6     | 0.95    | 1.0  |
| 0.69    | 1.7     | 0.46    | 3.1  |
| 0.72    | 0.8     | 0.30    | 0.3  |
| #DIV/0! | #DIV/0! | 0.36    | 0.0  |
| 0.06    | 0.7     | 0.23    | 0.8  |
| 0.85    | 1.3     | 0.49    | 2.5  |
| 0.22    | 2.4     | 0.90    | 1.1  |
| 0.63    | 1.5     | 0.06    | 24.0 |
| 0.65    | 1.6     | 0.05    | 11.3 |

|         |         |      |      |
|---------|---------|------|------|
| 0.19    | 0.1     | 0.45 | 0.2  |
| 0.51    | 0.5     | 0.71 | 0.6  |
| 0.60    | 1.3     | 0.85 | 0.9  |
| 0.05    | 6.4     | 0.80 | 1.3  |
| 0.66    | 1.3     | 0.15 | 4.4  |
| 0.60    | 1.1     | 0.10 | 1.2  |
| 0.78    | 1.1     | 0.88 | 0.9  |
| 0.29    | #DIV/0! | 0.36 | 2.7  |
| 0.58    | 1.6     | 0.20 | 0.5  |
| 0.86    | 1.1     | 0.46 | 1.8  |
| 0.19    | 0.0     | 0.14 | 0.0  |
| #DIV/0! | #DIV/0! | 0.36 | 0.0  |
| 0.29    | #DIV/0! | 0.36 | 2.7  |
| 0.15    | 1.6     | 0.04 | 1.7  |
| 0.51    | 1.5     | 0.39 | 1.5  |
| 0.06    | 1.3     | 0.00 | 1.6  |
| 0.44    | 0.3     | 0.75 | 0.7  |
| 0.77    | 0.9     | 0.09 | 0.6  |
| 0.67    | 1.4     | 0.10 | 2.2  |
| 0.29    | #DIV/0! | 0.37 | 0.0  |
| 0.11    | 3.0     | 0.12 | 2.8  |
| 0.33    | 0.8     | 0.65 | 0.9  |
| 0.39    | 0.9     | 0.00 | 4.1  |
| 0.88    | 0.9     | 0.46 | 0.5  |
| 0.29    | 0.5     | 0.16 | 0.4  |
| 0.93    | 1.1     | 0.63 | 2.2  |
| 0.59    | 0.6     | 0.36 | 6.8  |
| 0.28    | 1.1     | 0.01 | 1.4  |
| 0.62    | 0.8     | 0.47 | 0.7  |
| 0.34    | 1.2     | 0.11 | 1.6  |
| 0.35    | 1.9     | 0.44 | 1.4  |
| 0.29    | 0.9     | 0.56 | 0.9  |
| 0.32    | 0.4     | 0.22 | 0.5  |
| 0.16    | 1.7     | 0.17 | 1.6  |
| 0.97    | 1.0     | 0.00 | 0.2  |
| 0.93    | 1.0     | 0.53 | 1.5  |
| 0.02    | 4.3     | 0.02 | 8.5  |
| 0.06    | 10.3    | 0.10 | 8.2  |
| 0.08    | 1.8     | 0.10 | 1.8  |
| 0.64    | 1.4     | 0.30 | 2.2  |
| 0.29    | 4.1     | 0.21 | 47.9 |
| 0.69    | 1.2     | 0.78 | 0.9  |
| 0.34    | 0.5     | 0.95 | 1.1  |
| 0.99    | 1.0     | 0.05 | 0.4  |
| 0.74    | 1.4     | 0.19 | 3.5  |
| 0.32    | 3.6     | 0.66 | 1.5  |
| 0.67    | 0.9     | 0.06 | 1.6  |
| 0.79    | 0.9     | 1.00 | 1.0  |
| 0.10    | 33.3    | 0.18 | 9.4  |
| 0.31    | 2.0     | 0.68 | 1.2  |
| 0.70    | 0.8     | 0.51 | 2.2  |
| 0.65    | 0.8     | 0.04 | 28.4 |

|         |         |      |      |
|---------|---------|------|------|
| 0.83    | 0.9     | 0.55 | 0.6  |
| 0.85    | 1.2     | 0.04 | 0.3  |
| 0.02    | #DIV/0! | 0.06 | 11.2 |
| 0.93    | 1.0     | 0.12 | 5.4  |
| 0.81    | 1.2     | 0.45 | 0.6  |
| 0.92    | 1.0     | 0.00 | 0.3  |
| 0.12    | 0.6     | 0.13 | 0.5  |
| 0.41    | 1.3     | 0.00 | 72.9 |
| 0.29    | 2.7     | 0.21 | 0.5  |
| 0.32    | 0.6     | 0.34 | 3.0  |
| 0.21    | 2.2     | 0.20 | 2.2  |
| 0.19    | 1.8     | 0.03 | 6.5  |
| 0.13    | 3.8     | 0.33 | 0.7  |
| 0.04    | 2.2     | 0.01 | 11.0 |
| 0.04    | 0.5     | 0.24 | 2.2  |
| #DIV/0! | #DIV/0! | 0.00 | 0.0  |
| 0.87    | 0.9     | 0.47 | 0.8  |
| 0.39    | 1.5     | 0.15 | 2.5  |
| 0.29    | 1.6     | 0.77 | 1.1  |
| 0.62    | 0.8     | 0.63 | 1.2  |
| 0.43    | 2.3     | 0.29 | 9.4  |
| 0.05    | 3.7     | 0.32 | 0.6  |
| 0.18    | 0.6     | 0.00 | 0.1  |
| 0.92    | 1.1     | 0.55 | 2.1  |
| 0.32    | 1.2     | 0.06 | 1.3  |
| 0.23    | 0.4     | 0.14 | 0.3  |
| 0.74    | 0.7     | 0.55 | 1.5  |
| 0.83    | 1.1     | 0.35 | 0.7  |
| 0.02    | 0.3     | 0.89 | 0.9  |
| 0.68    | 0.7     | 0.02 | 0.2  |
| 0.32    | 1.3     | 0.39 | 0.5  |
| 0.09    | #DIV/0! | 0.74 | 1.5  |
| 0.10    | #DIV/0! | 0.66 | 1.5  |
| 0.14    | 1.9     | 0.43 | 1.5  |
| 0.52    | 0.8     | 0.21 | 1.5  |
| 0.11    | #DIV/0! | 0.19 | 14.1 |
| 0.48    | 3.4     | 0.93 | 0.9  |
| 0.34    | 0.7     | 0.48 | 0.7  |
| 0.03    | 1.3     | 0.29 | 1.4  |
| 0.04    | #DIV/0! | 0.07 | 66.8 |
| 0.77    | 0.7     | 0.39 | 0.1  |
| 0.02    | 60.1    | 0.04 | 19.0 |
| 0.07    | 4.0     | 0.08 | 5.8  |
| 0.58    | 1.1     | 0.47 | 1.3  |
| 0.88    | 1.0     | 0.88 | 1.0  |
| 0.61    | 1.5     | 0.40 | 1.7  |
| 0.88    | 1.0     | 0.84 | 1.1  |
| 0.55    | 0.4     | 0.39 | 0.3  |
| 0.55    | 1.6     | 0.21 | 6.8  |
| 0.29    | #DIV/0! | 0.36 | 31.3 |
| 0.83    | 0.9     | 0.05 | 4.7  |
| 0.18    | 1.2     | 0.16 | 1.1  |

|         |         |         |      |
|---------|---------|---------|------|
| 0.47    | 1.2     | 0.05    | 1.4  |
| 0.40    | 5.3     | 0.36    | 17.3 |
| 0.25    | 0.0     | #DIV/0! | 0    |
| 0.26    | 1.2     | 0.26    | 1.5  |
| 0.18    | 0.4     | 0.07    | 2.8  |
| 0.05    | 2.1     | 0.13    | 2.0  |
| 0.63    | 1.4     | 0.34    | 1.9  |
| 0.01    | 1.6     | 0.02    | 1.5  |
| 0.15    | 2.2     | 0.24    | 1.6  |
| 0.26    | 2.3     | 0.88    | 1.1  |
| 0.28    | 1.5     | 0.25    | 1.4  |
| 0.02    | 4.0     | 0.20    | 1.7  |
| 0.29    | #DIV/0! | 0.36    | 6.9  |
| 0.63    | 0.7     | 0.59    | 0.6  |
| 0.65    | 1.4     | 0.43    | 0.4  |
| 0.03    | 2.4     | 0.67    | 1.1  |
| 0.21    | 1.7     | 0.67    | 1.2  |
| 0.08    | 0.4     | 0.59    | 0.7  |
| 0.11    | 0.5     | 0.11    | 0.5  |
| 0.16    | #DIV/0! | 0.39    | 3.6  |
| 0.41    | 0.0     | #DIV/0! | 0    |
| 0.57    | 1.4     | 0.13    | 3.3  |
| 0.44    | 0.4     | 0.36    | 8.4  |
| 0.08    | 3.7     | 0.03    | 25.5 |
| 0.94    | 1.0     | 0.79    | 1.0  |
| #DIV/0! | #DIV/0! | #DIV/0! | 0    |
| 0.70    | 1.1     | 0.07    | 1.4  |
| 0.24    | 0.7     | 0.43    | 0.7  |
| 0.70    | 0.9     | 0.93    | 1.0  |
| 0.04    | 0.4     | 0.11    | 0.5  |
| 0.92    | 1.0     | 0.61    | 1.2  |
| #DIV/0! | #DIV/0! | #DIV/0! | 0    |
| 0.92    | 1.0     | 0.06    | 5.0  |
| 0.81    | 0.8     | 0.36    | 4.8  |
| 0.47    | 0.6     | 0.03    | 17.5 |
| 0.49    | 0.6     | 0.17    | 0.4  |
| 0.97    | 1.1     | 0.73    | 0.6  |
| 0.47    | 1.9     | 0.55    | 1.9  |
| 0.41    | 1.1     | 0.03    | 1.5  |
| 0.31    | 0.6     | 0.86    | 1.1  |
| 0.70    | 1.0     | 0.00    | 1.5  |
| 0.72    | 0.8     | 0.58    | 2.0  |
| 0.41    | 0.0     | #DIV/0! | 0    |
| 0.88    | 0.9     | 0.01    | 2.7  |
| 0.10    | 0.6     | 0.00    | 0.4  |
| 0.73    | 0.8     | 0.05    | 41.9 |
| 0.54    | 0.9     | 0.05    | 1.3  |
| 0.63    | 0.8     | 0.01    | 2.5  |
| 0.30    | 0.7     | 0.03    | 3.3  |
| 0.59    | 0.5     | 0.86    | 1.2  |
| 0.88    | 0.9     | 0.38    | 1.9  |
| 0.50    | 0.8     | 0.24    | 0.7  |

|         |         |         |      |
|---------|---------|---------|------|
| 0.68    | 0.9     | 0.48    | 1.6  |
| 0.14    | 1.3     | 0.06    | 1.3  |
| 0.49    | 0.8     | 0.08    | 1.9  |
| 0.23    | 0.6     | 0.34    | 0.5  |
| 0.21    | 1.1     | 0.00    | 1.7  |
| 0.47    | 1.4     | 0.07    | 4.5  |
| 0.80    | 0.9     | 0.65    | 0.9  |
| 0.98    | 1.0     | 0.00    | 1.7  |
| 0.94    | 1.0     | 0.17    | 2.9  |
| 0.64    | 0.9     | 0.78    | 1.1  |
| 0.75    | 0.9     | 0.52    | 0.6  |
| 0.11    | 1.7     | 0.02    | 2.5  |
| 0.77    | 1.5     | 0.80    | 0.8  |
| #DIV/0! | #DIV/0! | 0.36    | 0.0  |
| 0.55    | 0.4     | 0.86    | 0.8  |
| 0.41    | 0.0     | #DIV/0! | 0    |
| 0.41    | 0.0     | 0.36    | 0.0  |
| 0.75    | 0.9     | 0.43    | 0.7  |
| 0.41    | 0.0     | 0.03    | 0.0  |
| 0.21    | 0.0     | #DIV/0! | 0    |
| 0.90    | 1.1     | 0.17    | 3.1  |
| 0.28    | 1.1     | 0.18    | 1.1  |
| 0.97    | 1.0     | 0.56    | 1.3  |
| 0.51    | 0.7     | 0.50    | 1.3  |
| 0.71    | 1.2     | 0.21    | 2.4  |
| 0.53    | 1.2     | 0.06    | 1.6  |
| 0.14    | 2.0     | 0.50    | 1.5  |
| 0.32    | 0.6     | 0.96    | 1.0  |
| 0.60    | 0.9     | 0.43    | 0.8  |
| 0.14    | 1.9     | 0.04    | 3.3  |
| 0.76    | 1.1     | 0.93    | 1.0  |
| 0.61    | 1.3     | 0.02    | 2.7  |
| 0.55    | 0.7     | 0.36    | 0.4  |
| 0.47    | 0.9     | 0.00    | 1.6  |
| 0.86    | 1.1     | 0.54    | 1.3  |
| 0.20    | 1.9     | 0.65    | 0.9  |
| 0.43    | 0.9     | 0.01    | 1.5  |
| 0.09    | 1.4     | 0.00    | 1.6  |
| 1.00    | 1.0     | 0.16    | 40.1 |
| #DIV/0! | #DIV/0! | #DIV/0! | 0    |
| 0.23    | 1.4     | 0.17    | 2.3  |
| 0.57    | 0.5     | 0.43    | 0.5  |
| 0.41    | 0.3     | 0.26    | 2.4  |
| 0.44    | 0.7     | 0.15    | 0.4  |
| 0.99    | 1.0     | 0.85    | 1.1  |
| 0.11    | 0.8     | 0.22    | 0.9  |
| 0.46    | 0.7     | 0.00    | 1.7  |
| 0.18    | 3.4     | 0.08    | 7.5  |
| 0.14    | 0.2     | 0.22    | 0.2  |
| 0.41    | 1.3     | 0.03    | 2.4  |
| 0.43    | 0.8     | 0.61    | 1.1  |
| 0.79    | 0.8     | 0.73    | 0.9  |

|         |         |         |      |
|---------|---------|---------|------|
| 0.11    | 24.2    | 0.66    | 1.6  |
| 0.56    | 0.3     | 0.04    | 0.1  |
| #DIV/0! | #DIV/0! | #DIV/0! | 0    |
| 0.58    | 2.4     | 0.87    | 1.3  |
| 0.16    | 0.3     | 0.67    | 0.6  |
| 0.12    | 1.3     | 0.01    | 1.4  |
| 0.41    | 0.0     | #DIV/0! | 0    |
| 0.01    | 0.6     | 0.22    | 1.7  |
| 0.67    | 1.2     | 0.65    | 1.1  |
| 0.70    | 1.1     | 0.01    | 1.6  |
| 0.49    | 1.1     | 0.00    | 1.6  |
| 0.19    | 0.5     | 0.62    | 1.4  |
| 0.76    | 1.2     | 0.06    | 3.0  |
| 0.61    | 0.9     | 0.08    | 1.7  |
| 0.01    | 0.6     | 0.45    | 1.1  |
| 0.99    | 1.0     | 0.00    | 46.3 |
| 0.74    | 0.8     | 0.49    | 1.4  |
| 0.76    | 0.8     | 0.15    | 2.0  |
| 0.01    | 21.0    | 0.02    | 29.6 |
| 0.97    | 1.0     | 0.48    | 2.2  |
| 0.24    | 1.4     | 0.02    | 2.1  |
| 0.55    | 0.6     | 0.93    | 0.9  |
| 0.96    | 1.0     | 0.39    | 1.7  |
| 0.43    | 0.4     | 0.68    | 1.3  |
| 0.99    | 1.0     | 1.00    | 1.0  |
| 0.73    | 1.1     | 0.04    | 1.9  |
| 0.80    | 1.2     | 0.06    | 6.2  |
| 0.79    | 0.8     | 0.20    | 45.1 |
| 0.36    | 1.2     | 0.04    | 1.4  |
| 0.56    | 0.6     | 0.82    | 1.2  |
| 0.42    | 1.2     | 0.00    | 2.7  |
| 0.82    | 0.8     | 0.19    | 2.1  |
| 0.68    | 1.2     | 0.49    | 1.2  |
| 0.77    | 0.9     | 0.19    | 2.1  |
| 0.23    | 3.7     | 0.26    | 3.8  |
| 0.41    | 0.0     | #DIV/0! | 0    |
| 0.34    | 0.1     | 0.08    | 0.3  |
| 0.77    | 0.9     | 0.01    | 6.9  |
| 0.23    | 1.2     | 0.71    | 1.0  |
| 0.92    | 1.1     | 0.47    | 4.8  |
| 0.79    | 0.6     | 0.36    | 18.9 |
| 0.41    | 0.0     | #DIV/0! | 0    |
| #DIV/0! | #DIV/0! | 0.36    | 0.0  |
| 0.43    | 0.8     | 0.92    | 1.0  |
| 0.97    | 1.0     | 0.64    | 1.2  |
| 0.29    | #DIV/0! | 0.36    | 8.6  |
| 0.98    | 1.0     | 0.30    | 2.8  |
| 0.75    | 1.1     | 0.80    | 1.0  |
| 0.49    | 0.9     | 0.78    | 1.1  |
| 0.41    | 0.0     | #DIV/0! | 0    |
| 0.21    | 1.6     | 0.03    | 2.0  |
| 0.69    | 0.9     | 0.14    | 1.7  |

|      |     |         |       |
|------|-----|---------|-------|
| 0.78 | 0.9 | 0.59    | 1.3   |
| 0.47 | 0.1 | 0.36    | 5.1   |
| 0.81 | 1.1 | 0.04    | 2.6   |
| 0.75 | 1.3 | 0.92    | 1.1   |
| 0.11 | 0.6 | 0.06    | 0.7   |
| 0.70 | 0.9 | 0.12    | 1.4   |
| 0.81 | 1.1 | 0.05    | 9.7   |
| 0.41 | 0.0 | #DIV/0! | 0     |
| 0.72 | 0.9 | 0.00    | 2.1   |
| 0.10 | 0.4 | 0.95    | 1.0   |
| 0.47 | 0.9 | 0.00    | 0.3   |
| 0.92 | 1.0 | 0.01    | 1.6   |
| 0.80 | 1.4 | 0.36    | 135.8 |
| 0.78 | 0.9 | 0.20    | 2.7   |
| 0.37 | 0.8 | 0.18    | 0.7   |
| 0.41 | 0.0 | #DIV/0! | 0     |
| 0.30 | 1.3 | 0.28    | 1.5   |
| 0.91 | 1.0 | 0.89    | 1.0   |
| 0.49 | 1.9 | 0.30    | 6.2   |
| 0.51 | 0.9 | 0.58    | 1.1   |
| 0.81 | 1.0 | 0.72    | 1.1   |
| 0.63 | 0.8 | 0.91    | 0.9   |
| 0.48 | 0.8 | 0.33    | 0.8   |
| 0.27 | 0.9 | 0.19    | 0.8   |
| 0.40 | 0.7 | 0.94    | 1.0   |
| 0.43 | 2.8 | 0.80    | 1.4   |
| 0.42 | 1.4 | 0.43    | 1.4   |
| 0.07 | 0.0 | #DIV/0! | 0     |
| 0.02 | 6.0 | 0.06    | 3.4   |
| 0.40 | 0.9 | 0.47    | 0.9   |
| 0.83 | 1.4 | 0.36    | 11.4  |
| 0.60 | 0.9 | 0.25    | 1.3   |
| 0.44 | 0.9 | 0.16    | 1.2   |
| 0.73 | 0.8 | 0.23    | 0.6   |
| 0.46 | 1.0 | 0.01    | 1.3   |
| 0.49 | 1.5 | 0.66    | 0.8   |
| 0.37 | 0.4 | 0.69    | 1.8   |
| 0.11 | 0.5 | 0.29    | 0.5   |
| 0.93 | 1.0 | 0.21    | 2.0   |
| 0.43 | 1.2 | 0.00    | 2.9   |
| 0.48 | 1.4 | 0.02    | 6.8   |
| 0.25 | 1.1 | 0.06    | 1.2   |
| 0.39 | 0.7 | 0.48    | 1.6   |
| 0.36 | 0.7 | 0.49    | 0.8   |
| 0.28 | 0.4 | 0.50    | 0.3   |
| 0.65 | 0.7 | 0.16    | 191.4 |
| 0.85 | 1.1 | 0.20    | 0.6   |
| 0.24 | 0.1 | 0.49    | 0.2   |
| 0.79 | 1.0 | 0.55    | 1.1   |
| 0.15 | 0.8 | 0.72    | 1.1   |
| 0.50 | 0.9 | 0.08    | 0.8   |
| 0.08 | 2.2 | 0.15    | 1.8   |



|         |         |      |      |
|---------|---------|------|------|
| 0.25    | 0.8     | 0.56 | 1.2  |
| 0.02    | 0.0     | 0.05 | 0.1  |
| 0.76    | 0.9     | 0.22 | 2.4  |
| 0.68    | 0.9     | 0.74 | 1.2  |
| 0.15    | 7.4     | 0.19 | 8.8  |
| 1.00    | 1.0     | 0.42 | 0.7  |
| 0.19    | 5.8     | 1.00 | 1.0  |
| 0.36    | 3.1     | 0.48 | 2.3  |
| 0.78    | 1.1     | 0.52 | 0.6  |
| 0.92    | 1.0     | 0.30 | 1.4  |
| 0.26    | 0.5     | 0.22 | 8.3  |
| 0.35    | 0.4     | 0.12 | 0.2  |
| 0.10    | 3.0     | 0.15 | 2.7  |
| 0.89    | 1.1     | 0.18 | 2.9  |
| 0.89    | 0.9     | 0.72 | 1.2  |
| 0.36    | 0.4     | 0.07 | 4.4  |
| 0.26    | 1.2     | 0.02 | 1.5  |
| 0.22    | 1.2     | 0.00 | 2.0  |
| 0.09    | 1.2     | 0.00 | 1.9  |
| 0.02    | 2.5     | 0.00 | 59.9 |
| 0.74    | 0.8     | 0.17 | 4.1  |
| 0.79    | 0.9     | 0.15 | 3.8  |
| 0.95    | 1.0     | 0.24 | 1.8  |
| 0.10    | 1.7     | 0.40 | 1.4  |
| 0.73    | 0.6     | 0.70 | 0.7  |
| 0.29    | 1.3     | 0.61 | 0.7  |
| 0.01    | 1.4     | 0.39 | 1.2  |
| 0.40    | 1.5     | 0.01 | 55.1 |
| 0.90    | 1.1     | 0.70 | 0.8  |
| 0.53    | 0.6     | 0.15 | 4.8  |
| 0.40    | 0.6     | 0.55 | 1.3  |
| 0.92    | 1.0     | 0.68 | 1.2  |
| 0.00    | 5.3     | 0.07 | 1.7  |
| 0.42    | 1.8     | 0.11 | 4.4  |
| 0.42    | 1.3     | 0.06 | 3.5  |
| 0.80    | 0.9     | 0.91 | 1.1  |
| 0.03    | 1.5     | 0.02 | 1.5  |
| 0.15    | 1.7     | 0.03 | 2.8  |
| 0.96    | 1.0     | 0.58 | 1.2  |
| 0.93    | 1.0     | 0.17 | 1.7  |
| 0.20    | 1.5     | 0.13 | 1.7  |
| 0.02    | #DIV/0! | 0.10 | 5.4  |
| 0.43    | 1.5     | 0.01 | 14.6 |
| 0.02    | #DIV/0! | 0.68 | 1.5  |
| #DIV/0! | #DIV/0! | 0.36 | 0.0  |
| 0.11    | 1.4     | 0.00 | 4.0  |
| 0.92    | 1.0     | 0.38 | 1.3  |
| 0.67    | 0.6     | 0.36 | 4.5  |
| 0.48    | 3.4     | 0.36 | 20.4 |
| 0.96    | 1.0     | 0.68 | 0.8  |
| 0.08    | 0.7     | 0.66 | 0.9  |
| 0.75    | 1.0     | 0.01 | 1.6  |

|         |         |         |      |
|---------|---------|---------|------|
| 0.86    | 0.8     | 0.88    | 1.2  |
| 0.29    | 0.2     | 0.27    | 0.3  |
| 0.70    | 1.2     | 0.45    | 1.6  |
| 0.27    | 0.8     | 0.93    | 1.0  |
| 0.63    | 0.7     | 0.83    | 1.1  |
| 0.52    | 1.1     | 0.02    | 1.6  |
| 0.36    | 1.2     | 0.21    | 1.2  |
| 0.26    | 0.6     | 0.12    | 0.6  |
| 0.32    | 0.3     | 0.28    | 0.6  |
| 0.80    | 1.1     | 0.14    | 1.8  |
| 0.86    | 1.0     | 0.14    | 1.2  |
| 0.41    | 0.0     | 0.17    | 0.0  |
| 0.40    | 0.9     | 0.88    | 1.0  |
| 0.84    | 1.0     | 0.98    | 1.0  |
| 0.32    | 0.6     | 0.59    | 1.6  |
| 0.20    | #DIV/0! | 0.64    | 1.9  |
| 0.43    | 0.5     | 0.20    | 0.3  |
| 0.21    | 0.8     | 0.66    | 0.9  |
| 0.96    | 0.9     | 0.42    | 7.7  |
| 0.51    | 0.3     | 0.94    | 0.9  |
| 0.77    | 0.9     | 0.78    | 1.1  |
| 0.50    | 1.4     | 0.43    | 1.3  |
| 0.84    | 0.9     | 0.12    | 1.7  |
| #DIV/0! | #DIV/0! | #DIV/0! | 0    |
| 0.39    | 1.5     | 0.85    | 1.0  |
| 0.57    | 0.9     | 0.74    | 0.9  |
| 0.98    | 1.0     | 0.32    | 0.3  |
| 0.81    | 1.2     | 0.06    | 28.5 |
| 0.19    | 0.1     | 0.36    | 8.3  |
| 0.16    | 0.6     | 0.88    | 0.9  |
| 0.56    | 1.4     | 0.32    | 0.7  |
| 0.80    | 1.0     | 0.86    | 1.0  |
| 0.69    | 1.1     | 0.01    | 3.0  |
| 0.32    | 0.7     | 0.79    | 0.9  |
| 0.39    | 1.3     | 0.71    | 0.9  |
| 0.84    | 0.9     | 0.95    | 1.0  |
| 0.30    | 0.3     | 0.37    | 0.4  |
| 0.28    | 0.5     | 0.23    | 0.4  |
| 0.57    | 0.8     | 0.51    | 1.3  |
| 0.40    | 0.7     | 0.17    | 0.6  |
| 0.22    | 0.6     | 0.52    | 0.6  |
| 0.83    | 1.2     | 0.46    | 3.2  |
| 0.82    | 0.9     | 0.14    | 3.0  |
| 0.50    | 0.8     | 0.17    | 1.4  |
| 0.28    | 0.7     | 0.57    | 0.9  |
| 0.21    | 0.6     | 0.31    | 1.5  |
| 0.73    | 0.8     | 0.42    | 0.4  |
| 0.58    | 1.1     | 0.02    | 2.0  |
| 0.37    | 0.5     | 0.29    | 0.4  |
| 0.49    | 1.1     | 0.03    | 1.6  |
| 0.82    | 1.1     | 0.44    | 1.5  |
| 0.96    | 1.0     | 0.15    | 3.3  |

|      |         |         |       |
|------|---------|---------|-------|
| 0.25 | 0.3     | 0.27    | 0.2   |
| 0.18 | 0.6     | 0.56    | 0.7   |
| 0.69 | 1.1     | 0.27    | 0.9   |
| 0.22 | 0.7     | 0.60    | 0.8   |
| 0.41 | 0.0     | #DIV/0! | 0     |
| 0.69 | 1.8     | 0.36    | 75.7  |
| 0.12 | 1.3     | 0.08    | 1.3   |
| 0.63 | 1.2     | 0.70    | 0.7   |
| 0.17 | 0.7     | 0.08    | 0.6   |
| 0.10 | 0.6     | 0.38    | 0.8   |
| 0.98 | 1.0     | 0.41    | 0.6   |
| 0.43 | 0.8     | 0.73    | 1.1   |
| 0.57 | 1.2     | 0.78    | 1.1   |
| 0.74 | 1.1     | 0.53    | 1.2   |
| 0.32 | 2.6     | 0.14    | 184.8 |
| 0.62 | 2.0     | 0.60    | 0.6   |
| 0.23 | 0.8     | 0.28    | 1.2   |
| 0.16 | 0.4     | 0.08    | 0.1   |
| 0.90 | 0.9     | 0.95    | 0.9   |
| 0.09 | 1.6     | 0.01    | 2.4   |
| 0.33 | 1.2     | 0.03    | 2.1   |
| 0.63 | 1.1     | 0.06    | 1.3   |
| 0.67 | 0.8     | 0.15    | 2.2   |
| 0.63 | 0.8     | 0.49    | 1.4   |
| 0.51 | 0.8     | 0.32    | 0.7   |
| 0.83 | 0.9     | 0.23    | 2.1   |
| 0.08 | 1.2     | 0.74    | 0.9   |
| 0.39 | 1.4     | 0.04    | 7.7   |
| 0.41 | 0.0     | 0.36    | 0.0   |
| 0.78 | 0.6     | 0.36    | 82.1  |
| 0.46 | 0.7     | 0.69    | 0.8   |
| 0.05 | 0.7     | 0.93    | 1.0   |
| 0.82 | 1.1     | 0.03    | 2.9   |
| 0.42 | 1.6     | 0.67    | 1.3   |
| 0.03 | 1.4     | 0.19    | 1.2   |
| 0.22 | 2.1     | 0.11    | 2.4   |
| 0.54 | 1.5     | 0.59    | 1.4   |
| 0.24 | 1.2     | 0.24    | 1.2   |
| 0.77 | 1.1     | 0.02    | 2.6   |
| 0.73 | 1.1     | 0.85    | 0.9   |
| 0.83 | 1.1     | 0.00    | 4.6   |
| 0.09 | #DIV/0! | 0.20    | 7.2   |
| 0.01 | 6.0     | 0.00    | 7.0   |
| 0.95 | 1.0     | 0.41    | 1.4   |
| 0.26 | 9.5     | 0.27    | 212.4 |
| 0.83 | 0.9     | 0.29    | 1.4   |
| 0.90 | 0.9     | 0.00    | 3.8   |
| 0.53 | 1.5     | 0.06    | 35.9  |
| 0.05 | 0.7     | 0.98    | 1.0   |
| 0.09 | #DIV/0! | 0.32    | 3.4   |
| 0.52 | 1.1     | 0.85    | 1.1   |
| 0.75 | 0.9     | 0.05    | 2.2   |

|      |     |      |      |
|------|-----|------|------|
| 0.71 | 1.2 | 0.24 | 1.6  |
| 0.60 | 1.2 | 0.03 | 4.1  |
| 0.63 | 1.1 | 0.83 | 1.0  |
| 0.87 | 1.0 | 0.34 | 1.3  |
| 0.56 | 1.3 | 0.06 | 1.8  |
| 0.85 | 1.3 | 0.26 | 0.2  |
| 0.34 | 2.5 | 0.62 | 0.6  |
| 0.69 | 0.8 | 0.52 | 1.5  |
| 0.19 | 0.7 | 0.46 | 1.2  |
| 0.43 | 0.8 | 0.21 | 1.8  |
| 0.38 | 1.8 | 0.29 | 2.2  |
| 0.97 | 1.0 | 0.05 | 1.8  |
| 0.33 | 0.7 | 0.24 | 1.9  |
| 0.06 | 0.2 | 0.19 | 0.3  |
| 0.13 | 3.4 | 0.70 | 1.2  |
| 0.29 | 0.7 | 0.71 | 1.2  |
| 0.32 | 0.6 | 0.42 | 1.6  |
| 0.55 | 1.4 | 0.61 | 1.4  |
| 0.29 | 0.2 | 0.98 | 1.0  |
| 0.89 | 0.9 | 0.64 | 0.8  |
| 0.66 | 0.9 | 0.86 | 0.9  |
| 0.84 | 0.9 | 0.77 | 1.1  |
| 0.21 | 0.0 | 0.22 | 0.2  |
| 0.28 | 0.6 | 0.57 | 0.8  |
| 0.37 | 0.8 | 0.86 | 1.0  |
| 0.78 | 0.9 | 0.90 | 1.1  |
| 0.34 | 0.6 | 0.40 | 0.8  |
| 0.16 | 0.6 | 0.81 | 0.9  |
| 0.21 | 0.4 | 0.80 | 0.9  |
| 0.52 | 0.9 | 0.20 | 1.2  |
| 0.40 | 1.4 | 0.17 | 1.9  |
| 0.87 | 1.1 | 0.57 | 0.6  |
| 0.64 | 0.7 | 0.78 | 1.2  |
| 0.66 | 0.8 | 0.46 | 0.7  |
| 0.60 | 0.6 | 0.98 | 1.0  |
| 0.75 | 0.6 | 0.36 | 7.0  |
| 0.86 | 1.3 | 0.94 | 1.1  |
| 0.14 | 3.9 | 0.17 | 0.3  |
| 0.88 | 0.9 | 0.42 | 1.7  |
| 0.23 | 3.2 | 0.12 | 13.4 |
| 0.49 | 1.6 | 0.70 | 1.3  |
| 0.34 | 0.8 | 0.17 | 0.8  |
| 0.53 | 0.8 | 0.01 | 1.3  |
| 0.25 | 0.0 | 0.80 | 0.7  |
| 0.94 | 1.0 | 0.59 | 1.1  |
| 0.95 | 1.0 | 0.30 | 1.1  |
| 0.46 | 0.7 | 0.45 | 0.7  |
| 0.72 | 1.3 | 0.48 | 0.7  |
| 0.49 | 1.9 | 0.57 | 0.8  |
| 0.31 | 0.6 | 0.43 | 0.7  |
| 0.56 | 1.4 | 0.97 | 1.0  |
| 0.55 | 1.6 | 0.62 | 1.5  |

|      |         |      |      |
|------|---------|------|------|
| 0.71 | 0.8     | 0.85 | 1.1  |
| 0.88 | 0.9     | 0.88 | 1.1  |
| 0.06 | 0.5     | 0.72 | 1.2  |
| 0.61 | 1.5     | 0.94 | 1.1  |
| 0.47 | 0.3     | 0.65 | 2.1  |
| 0.94 | 1.0     | 0.65 | 0.8  |
| 0.37 | 0.6     | 0.07 | 0.5  |
| 0.45 | 0.6     | 0.20 | 0.6  |
| 1.00 | 1.0     | 0.11 | 0.3  |
| 0.23 | 0.6     | 0.01 | 0.7  |
| 0.56 | 0.7     | 0.58 | 0.8  |
| 0.97 | 1.0     | 0.54 | 0.9  |
| 0.52 | 0.9     | 0.45 | 0.9  |
| 0.95 | 1.0     | 0.02 | 2.9  |
| 0.60 | 0.6     | 0.54 | 1.6  |
| 0.12 | 0.7     | 0.80 | 0.9  |
| 0.14 | 0.4     | 0.43 | 0.7  |
| 0.64 | 0.7     | 0.66 | 0.7  |
| 0.56 | 0.9     | 0.66 | 1.1  |
| 0.70 | 0.8     | 0.44 | 2.1  |
| 0.93 | 1.1     | 0.33 | 0.7  |
| 0.54 | 1.7     | 0.40 | 0.6  |
| 0.14 | 2.7     | 0.84 | 1.1  |
| 0.96 | 1.0     | 0.53 | 0.8  |
| 0.64 | 0.6     | 0.15 | 86.0 |
| 0.93 | 1.0     | 0.05 | 1.4  |
| 0.55 | 0.9     | 0.00 | 0.7  |
| 0.96 | 1.0     | 0.31 | 1.3  |
| 0.68 | 1.7     | 0.40 | 0.3  |
| 0.07 | 0.8     | 0.61 | 0.9  |
| 0.65 | 0.8     | 0.91 | 1.1  |
| 0.27 | #DIV/0! | 0.48 | 3.8  |
| 0.98 | 1.0     | 0.88 | 0.9  |
| 0.52 | 1.4     | 0.14 | 0.7  |
| 0.25 | 0.1     | 0.59 | 0.4  |
| 0.81 | 1.2     | 0.60 | 0.7  |
| 0.13 | 9.8     | 0.91 | 1.1  |
| 0.78 | 0.8     | 0.86 | 1.3  |
| 0.75 | 0.7     | 0.05 | 0.3  |
| 0.92 | 1.1     | 0.86 | 0.8  |
| 0.93 | 0.9     | 0.90 | 0.9  |
| 0.82 | 0.7     | 0.06 | 0.3  |
| 0.22 | 0.2     | 0.02 | 0.1  |
| 0.37 | 1.8     | 0.65 | 0.8  |
| 0.43 | 1.3     | 0.09 | 2.4  |
| 0.97 | 1.0     | 0.25 | 3.1  |
| 0.82 | 1.2     | 0.41 | 0.5  |
| 0.98 | 1.0     | 0.30 | 1.4  |
| 0.47 | 0.5     | 0.20 | 0.3  |
| 0.65 | 1.3     | 0.83 | 0.9  |
| 0.80 | 1.1     | 0.39 | 0.8  |
| 0.29 | #DIV/0! | 0.96 | 0.9  |

|         |         |         |        |
|---------|---------|---------|--------|
| 0.07    | 3.4     | 0.69    | 0.9    |
| 0.60    | 1.6     | 0.98    | 1.0    |
| 0.37    | 0.8     | 0.88    | 1.1    |
| 0.67    | 1.1     | 0.00    | 1.8    |
| 0.78    | 1.0     | 0.61    | 1.1    |
| 0.44    | 1.3     | 0.03    | 4.8    |
| 0.74    | 1.1     | 0.02    | 2.7    |
| 0.48    | 1.2     | 0.24    | 1.3    |
| 0.78    | 1.2     | 0.14    | 2.0    |
| 0.38    | 1.2     | 1.00    | 1.0    |
| #DIV/0! | #DIV/0! | #DIV/0! | 0      |
| 0.19    | 18.1    | 0.62    | 1.7    |
| #DIV/0! | #DIV/0! | #DIV/0! | 0      |
| 0.60    | 0.8     | 0.48    | 1.4    |
| 0.32    | 0.6     | 0.36    | 0.6    |
| 0.25    | 0.2     | 0.05    | 0.1    |
| 0.19    | 0.0     | #DIV/0! | 0      |
| 0.04    | 0.5     | 0.12    | 0.5    |
| 0.24    | 0.4     | 0.85    | 1.3    |
| 0.66    | 0.5     | 0.01    | 0.2    |
| 0.61    | 0.4     | 0.47    | 0.4    |
| 0.63    | 0.6     | 0.06    | 0.3    |
| 0.21    | 0.5     | 0.37    | 2.5    |
| 0.39    | 0.4     | 0.02    | 0.3    |
| 0.97    | 0.9     | 0.36    | 32.3   |
| 0.53    | 2.7     | 0.36    | 298.5  |
| 0.46    | 0.2     | 0.07    | 0.2    |
| 0.37    | 0.4     | 0.04    | 0.3    |
| 0.16    | 0.2     | 0.04    | 0.2    |
| 0.34    | 11.4    | 0.73    | 1.7    |
| 0.80    | 1.2     | 0.06    | 0.6    |
| 0.10    | 0.3     | 0.05    | 0.3    |
| 0.57    | 0.6     | 0.21    | 0.5    |
| 0.40    | 0.6     | 0.60    | 0.7    |
| 0.06    | 0.3     | 0.03    | 0.3    |
| 0.63    | 1.4     | 0.11    | 3.0    |
| 0.66    | 1.2     | 0.68    | 1.1    |
| 0.66    | 0.5     | 0.35    | 4.0    |
| 0.68    | 0.8     | 0.24    | 0.7    |
| 0.45    | 1.4     | 0.21    | 0.6    |
| 0.72    | 0.9     | 0.04    | 0.7    |
| 0.10    | 7.2     | 0.83    | 0.9    |
| 0.64    | 1.3     | 0.64    | 0.8    |
| 0.46    | 0.1     | 0.36    | 18.1   |
| 0.94    | 1.1     | 0.46    | 4.4    |
| 0.33    | 3.0     | 0.54    | 2.2    |
| 0.49    | 0.5     | 0.36    | 822.4  |
| #DIV/0! | #DIV/0! | #DIV/0! | 0      |
| 0.52    | 0.6     | 0.13    | 1788.9 |
| 0.23    | 4.2     | 0.20    | 7.3    |
| 0.96    | 1.0     | 0.92    | 0.9    |
| 0.45    | 0.4     | 0.61    | 0.4    |
