# Supplementary material
Source: PubMed Central journal article supplement (PMC3255083)
Supplement: NIHMS77189-supplement-02.pdf [file NIHMS77189-supplement-02.pdf]

# Laboratory of Mass Spectrometry and Gaseous Ion Chemistry

## PROWL

- ▶ **ProFound**
- ▶ **ProteinInfo**
- ▶ **PeptideMap**
- ▶ **PepFrag**
- ▶ **X! Tandem**
- ▶ **X! Hunter**
- ▶ **GPMDDB**
- ▶ **PROWL Home**
- ▶ **Chait Lab**

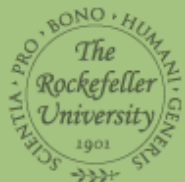

The Rockefeller University  
1230 York Avenue,  
New York, NY 10021  
(212) 327-8000

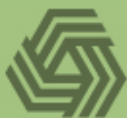

**National Center for  
Research Resources**

National Resource  
for the Mass Spectrometric  
Analysis of Biological  
Macromolecules

## ProFound

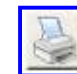

### Protein Candidates

| Rank | Expectation           | Protein Information and Sequence Analyse Tools (T)                                                                                                                            | %  | pI  | kDa   | R |
|------|-----------------------|-------------------------------------------------------------------------------------------------------------------------------------------------------------------------------|----|-----|-------|---|
| +1   | 1.2×10 <sup>-16</sup> | gi 38197676 gb AAH61872.1  Desmin [Rattus norvegicus]                                                                                                                         | 62 | 5.2 | 53.46 | ⊙ |
| -    |                       | gi 11968118 ref NP_071976.1  desmin [Rattus norvegicus]                                                                                                                       | 60 | 5.2 | 53.50 | ⊙ |
| -    |                       | gi 40538874 ref NP_631977.1  nexilin isoform b [Rattus norvegicus]                                                                                                            | 35 | 5.0 | 72.21 | ⊙ |
| -    |                       | gi 6651167 gb AAF22213.1 AF139494_1 syndapin IIba [Rattus norvegicus]                                                                                                         | 36 | 5.1 | 56.06 | ⊙ |
| -    |                       | gi 22256944 sp Q9QY17 PACN2_RAT Protein kinase C and casein kinase substrate in neurons 2 protein (Synaptic dynamin-associated protein II) (Syndapin 2) (Syndapin-II) (SdpII) | 35 | 5.0 | 56.30 | ⊙ |
| -    |                       | gi 51858601 gb AAH81803.1  Hspa2 protein [Rattus norvegicus]                                                                                                                  | 36 | 5.5 | 69.91 | ⊙ |
| -    |                       | gi 56090413 ref NP_001007661.1  hypothetical protein LOC300359 [Rattus norvegicus]                                                                                            | 32 | 5.3 | 60.85 | ⊙ |
| -    |                       | gi 3132829 gb AAC16391.1  nuclear RNA helicase [Rattus norvegicus]                                                                                                            | 42 | 5.4 | 49.58 | ⊙ |
| -    |                       | gi 55926219 ref NP_446015.2  nuclear RNA helicase, DECD variant of DEAD box family [Rattus norvegicus]                                                                        | 42 | 5.5 | 49.61 | ⊙ |
| -    |                       | gi 6651169 gb AAF22214.1 AF139495_1 syndapin IIbb [Rattus norvegicus]                                                                                                         | 38 | 5.3 | 51.62 | ⊙ |
| -    |                       | gi 6651165 gb AAF22212.1 AF139493_1 syndapin IIab [Rattus norvegicus]                                                                                                         | 37 | 5.2 | 51.86 | ⊙ |
| -    |                       | gi 47087085 ref NP_997710.1  type I keratin KA17 [Rattus norvegicus]                                                                                                          | 43 | 5.0 | 48.39 | ⊙ |
| -    |                       | gi 56788780 gb AAH88424.1  Krt1-19 protein [Rattus norvegicus]                                                                                                                | 42 | 5.3 | 46.68 | ⊙ |

|   |                                                                                                                 |    |     |       |   |
|---|-----------------------------------------------------------------------------------------------------------------|----|-----|-------|---|
| - | gi 42409519 ref NP_955792.1  keratin complex 1, acidic, gene 19 [Rattus norvegicus]                             | 44 | 5.2 | 44.62 | 🔴 |
| - | gi 21314404 gb AAM46928.1  liver regeneration-related protein 2 [Rattus norvegicus]                             | 33 | 5.2 | 65.48 | 🔴 |
| - | gi 111518 pir  A37180 chromogranin/secretogranin-like vesicle protein precursor - rat                           | 41 | 5.3 | 59.75 | 🔴 |
| - | gi 56090427 ref NP_001007695.1  interferon-induced protein with tetratricopeptide repeats 3 [Rattus norvegicus] | 37 | 5.5 | 48.78 | 🔴 |
| - | gi 1857139 gb AAC53054.1  guanylate kinase associated protein [Rattus norvegicus]                               | 25 | 5.3 | 74.96 | 🔴 |
| - | gi 92355 pir  S08211 dnaK-type molecular chaperone hst70 - rat                                                  | 37 | 5.4 | 69.81 | 🔴 |
| - | gi 16758722 ref NP_446308.1  secretogranin III [Rattus norvegicus]                                              | 45 | 4.9 | 53.17 | 🔴 |
| - | gi 27659719 ref NP_659549.2  optineurin [Rattus norvegicus]                                                     | 32 | 5.2 | 67.20 | 🔴 |
| - | gi 52000743 sp  Q63862_2 [Segment 2 of 2] Myosin-11 (Myosin heavy chain, smooth muscle isoform) (SMMHC)         | 36 | 5.1 | 71.76 | 🔴 |
| - | gi 11177910 ref NP_068635.1  heat shock protein 2 [Rattus norvegicus]                                           | 33 | 5.4 | 69.80 | 🔴 |
| - | gi 51858922 gb AAH81736.1  Clcc1 protein [Rattus norvegicus]                                                    | 19 | 5.3 | 62.11 | 🔴 |
| - | gi 19173780 ref NP_596905.1  Mid-1-related chloride channel 1 [Rattus norvegicus]                               | 18 | 5.4 | 62.07 | 🔴 |
| - | gi 203734 gb AAA19668.1  cytokeratin 8 polypeptide                                                              | 42 | 5.5 | 52.69 | 🔴 |
| - | gi 4079713 gb AAC98729.1  reggie1-4 [Rattus norvegicus]                                                         | 49 | 5.2 | 41.96 | 🔴 |
| - | gi 13929186 ref NP_114018.1  flotillin 2 [Rattus norvegicus]                                                    | 43 | 5.2 | 47.55 | 🔴 |
| - | gi 13124119 sp Q9Z2S9 FLOT2_RAT Flotillin-2 (Reggie-1) (REG-1)                                                  | 43 | 5.1 | 47.42 | 🔴 |
| - | gi 19173762 ref NP_596893.1  nucleosome assembly protein 1-like 3 [Rattus norvegicus]                           | 22 | 4.7 | 61.33 | 🔴 |
| - | gi 34862422 ref XP_343190.1  PREDICTED: similar to cytoskeleton-associated protein 4 [Rattus norvegicus]        | 30 | 5.4 | 63.59 | 🔴 |

NOTE:

1. To search again using **unmatched masses**, click the symbol .
2. Highly similar protein sequences were given the same rank (click "+" to expand/contract).

### Input Summary

**Search id** A51AD53A-1530-55291B4E

**Sequences** 20092

**Date & Time** Mon Jan 22 19:50:45 2007 UTC (Search Time: 0.63 sec.)

**Sample ID**

**Database** NCBI nr [..\databases\nr]

**Taxonomy** Rattus

**Mass Range** 40 - 75 kDa

**pI Range** 4.0 -5.5

**Digestion** Trypsin

**Missed Cuts** 2

**Modifications** +C2H3ON@C(Complete); +O@M(Partial);

**Charge State** MH+

**Masses (avg)**

**Tolerance (avg)** 1.00 ppm

**Masses (mon)** 707.397 717.443 729.448 735.451 741.442 743.421 751.433  
 756.417 757.453 765.318 766.435 768.520 771.393 778.468  
 780.420 786.404 788.442 794.381 797.378 802.436 811.949  
 813.444 816.439 822.714 823.486 826.383 832.308 838.917  
 839.424 848.371 854.414 858.468 863.481 870.530 878.405  
 881.557 882.516 884.475 891.449 898.532 904.914 905.480  
 911.440 922.519 925.464 934.447 939.512 947.487 953.792  
 954.456 956.536 964.541 967.510 973.545 981.874 989.519  
 996.514 999.489 1009.510 1011.563 1015.503 1021.601  
 1023.623 1027.501 1041.913 1042.564 1054.240 1055.464  
 1062.557 1064.575 1068.530 1075.535 1082.563 1086.595  
 1093.526 1100.612 1101.550 1108.527 1124.579 1125.527  
 1129.549 1135.481 1141.474 1148.578 1156.573 1172.600  
 1187.624 1196.638 1204.052 1204.612 1212.659 1222.615  
 1228.693 1229.778 1237.625 1242.696 1250.679 1255.634  
 1259.596 1263.563 1271.565 1272.573 1277.619 1284.942  
 1285.569 1293.641 1297.613 1300.524 1307.912 1308.642

|          |          |          |          |          |          |
|----------|----------|----------|----------|----------|----------|
| 1314.589 | 1320.549 | 1327.699 | 1328.632 | 1335.656 | 1348.625 |
| 1357.685 | 1366.577 | 1374.650 | 1379.695 | 1383.647 | 1392.674 |
| 1399.615 | 1401.680 | 1405.715 | 1418.664 | 1419.678 | 1425.720 |
| 1433.762 | 1434.730 | 1442.490 | 1446.635 | 1454.632 | 1460.748 |
| 1467.702 | 1469.095 | 1472.605 | 1475.758 | 1486.793 | 1488.610 |
| 1490.741 | 1501.571 | 1502.615 | 1515.636 | 1518.625 | 1523.718 |
| 1528.661 | 1536.144 | 1536.725 | 1539.734 | 1542.694 | 1549.787 |
| 1550.741 | 1553.711 | 1561.788 | 1573.728 | 1575.811 | 1584.695 |
| 1587.751 | 1596.561 | 1597.798 | 1601.783 | 1609.714 | 1611.659 |
| 1615.823 | 1623.842 | 1625.742 | 1628.783 | 1634.874 | 1642.832 |
| 1643.814 | 1648.785 | 1657.763 | 1662.755 | 1670.945 | 1673.808 |
| 1681.805 | 1682.799 | 1687.829 | 1696.801 | 1699.797 | 1707.689 |
| 1715.822 | 1724.254 | 1730.802 | 1738.821 | 1740.787 | 1749.505 |
| 1752.773 | 1761.748 | 1765.819 | 1768.762 | 1777.210 | 1778.743 |
| 1783.744 | 1792.683 | 1796.848 | 1805.248 | 1807.251 | 1816.651 |
| 1820.843 | 1830.797 | 1834.659 | 1838.814 | 1847.775 | 1868.847 |
| 1880.800 | 1883.954 | 1894.666 | 1899.828 | 1914.883 | 1923.201 |
| 1926.923 | 1935.149 | 1936.867 | 1940.900 | 1945.886 | 1963.271 |
| 1965.898 | 1973.967 | 1993.881 | 2007.013 | 2017.766 | 2023.033 |
| 2032.129 | 2042.037 | 2045.873 | 2055.998 | 2063.944 | 2072.029 |
| 2078.962 | 2088.983 | 2091.939 | 2096.931 | 2109.965 | 2112.131 |
| 2122.542 | 2131.114 | 2140.014 | 2149.870 | 2152.868 | 2157.934 |
| 2167.517 | 2170.904 | 2179.887 | 2184.984 | 2193.996 | 2196.015 |
| 2206.948 | 2211.000 | 2219.875 | 2222.669 | 2226.925 | 2230.931 |
| 2240.420 | 2245.906 | 2254.852 | 2257.987 | 2267.084 | 2272.989 |
| 2282.374 | 2286.043 | 2295.778 | 2308.574 | 2311.034 | 2321.146 |
| 2327.965 | 2339.026 | 2345.871 | 2354.948 | 2365.746 | 2369.088 |
| 2378.407 | 2381.035 | 2383.796 | 2392.946 | 2398.880 | 2411.828 |
| 2418.580 | 2428.394 | 2432.644 | 2441.754 | 2446.882 | 2453.148 |
| 2463.366 | 2465.239 | 2469.119 | 2474.007 | 2484.201 | 2486.283 |
| 2495.291 | 2501.081 | 2510.048 | 2520.248 | 2522.006 | 2528.166 |
| 2530.875 | 2540.099 | 2543.766 | 2553.967 | 2556.826 | 2566.302 |
| 2576.137 | 2588.114 | 2596.069 | 2608.023 | 2616.008 | 2628.147 |
| 2631.255 | 2643.083 | 2655.978 | 2661.255 | 2671.131 | 2682.977 |
| 2688.700 | 2697.857 | 2704.927 | 2716.847 | 2744.929 | 2755.169 |
| 2768.617 | 2781.528 | 2785.791 | 2796.392 | 2807.156 | 2821.229 |
| 2825.164 | 2835.194 | 2836.556 | 2842.009 | 2863.514 | 2883.580 |
| 2889.078 | 2900.814 | 2904.078 | 2918.172 | 2925.595 | 2935.216 |
| 2946.825 | 2951.578 | 2964.172 | 2978.042 | 2987.527 | 2994.668 |



|          |          |          |          |          |          |
|----------|----------|----------|----------|----------|----------|
| 3001.745 | 3012.966 | 3023.172 | 3027.021 | 3031.912 | 3044.080 |
| 3047.719 | 3054.114 | 3066.996 | 3078.187 | 3080.876 | 3085.062 |
| 3096.810 | 3106.029 | 3108.279 | 3112.483 | 3115.937 | 3128.119 |
| 3130.980 | 3142.135 | 3144.247 | 3147.946 | 3159.281 | 3176.777 |
| 3187.860 | 3199.569 | 3205.889 | 3214.961 | 3222.594 | 3234.061 |
| 3245.547 | 3248.460 | 3252.295 | 3258.512 | 3264.658 | 3277.044 |
| 3283.824 | 3291.150 | 3304.049 | 3311.321 | 3324.801 | 3336.909 |
| 3349.350 | 3355.813 | 3369.927 | 3381.098 | 3387.747 | 3401.377 |
| 3423.052 | 3441.323 | 3452.688 | 3473.015 | 3491.335 | 3496.498 |
| 3501.188 | 3512.568 | 3524.763 | 3535.780 | 3540.895 | 3554.339 |
| 3562.593 | 3570.536 | 3587.411 | 3591.596 | 3604.648 | 3621.601 |
| 3633.652 | 3637.782 | 3643.697 | 3655.946 | 3658.950 | 3672.362 |
| 3685.065 | 3695.339 |          |          |          |          |

**Tolerance** 52.00 ppm  
**(mon)**

**Number of** 418  
**Peptides**

# Laboratory of Mass Spectrometry and Gaseous Ion Chemistry

## PROWL

- ▶ **ProFound**
- ▶ **ProteinInfo**
- ▶ **PeptideMap**
- ▶ **PepFrag**
- ▶ **X! Tandem**
- ▶ **X! Hunter**
- ▶ **GPMDDB**
- ▶ **PROWL Home**
- ▶ **Chait Lab**

## ProFound



### Protein Candidates

| Rank | Expectation           | Protein Information and Sequence Analyse Tools (T)                                              | %  | pI  | kDa   | R |
|------|-----------------------|-------------------------------------------------------------------------------------------------|----|-----|-------|---|
| 1    | 4.5×10 <sup>-11</sup> | gi 8393910 ref NP_058932.1  phosphatidylethanolamine binding protein [Rattus norvegicus]        | 36 | 5.5 | 20.90 | ⊙ |
| 2    | 6.5×10 <sup>-7</sup>  | gi 56268897 gb AAH87105.1  Neurocalcin delta [Rattus norvegicus]                                | 31 | 5.2 | 22.34 | ⊙ |
| 3    | 1.6×10 <sup>-6</sup>  | gi 38454238 ref NP_942044.1  RAB15, member RAS oncogene family [Rattus norvegicus]              | 25 | 5.4 | 24.61 | ⊙ |
| +4   | 6.5×10 <sup>-6</sup>  | gi 22219117 pdb 1KWZ A Chain A, Rat Mannose Protein A (H189v) Complexed With Man-A13-Man        | 20 | 6.0 | 16.63 | ⊙ |
| -    | -                     | gi 22219120 pdb 1KX0 A Chain A, Rat Mannose Protein A (H189v I207v) Complexed With Man-A13- Man | 20 | 6.0 | 16.61 | ⊙ |
| -    | -                     | gi 206553 gb AAA42006.1  ras protein                                                            | 16 | 6.0 | 22.97 | ⊙ |
| -    | -                     | gi 6531679 gb AAF15537.1 AF202266_1 unknown [Rattus norvegicus]                                 | 19 | 5.2 | 25.57 | ⊙ |
| -    | -                     | gi 32492566 gb AAP85371.1  Aa1114 [Rattus norvegicus]                                           | 19 | 5.5 | 28.09 | ⊙ |
| -    | -                     | gi 57528169 ref NP_001009624.1  hypothetical protein LOC287598 [Rattus norvegicus]              | 40 | 5.7 | 16.67 | ⊙ |
| -    | -                     | gi 786459 gb AAB32798.1  protein tyrosine phosphatase; PTP; CL100; 3CH134 [Rattus sp.]          | 20 | 4.9 | 19.19 | ⊙ |
| -    | -                     | gi 16758368 ref NP_446041.1  RAB14, member RAS oncogene family [Rattus norvegicus]              | 18 | 5.8 | 24.14 | ⊙ |
| -    | -                     | gi 420272 pir  E42148 GTP-binding protein rab14 - rat                                           | 18 | 5.8 | 24.08 | ⊙ |
| -    | -                     | gi 13430206 gb AAK25769.1  non-erythrocyte beta-spectrin [Rattus norvegicus]                    | 25 | 5.6 | 23.31 | ⊙ |
| -    | -                     | gi 13559353 dbj BAB40836.1  h-caldesmon [Rattus norvegicus]                                     | 12 | 5.0 | 26.62 | ⊙ |

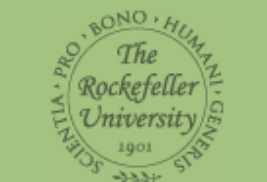

The Rockefeller University  
1230 York Avenue,  
New York, NY 10021  
(212) 327-8000

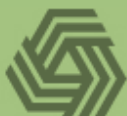

**National Center for  
Research Resources**

National Resource  
for the Mass Spectrometric  
Analysis of Biological  
Macromolecules

|   |                                                                                           |    |     |       |  |
|---|-------------------------------------------------------------------------------------------|----|-----|-------|--|
| - | <a href="#">gi 7441592 pir  S74158</a> cGMP-gated cation channel protein - rat (fragment) | 21 | 4.8 | 21.43 |  |
| - | <a href="#">gi 6940826 gb AAF31764.1 AF130338_1</a> beta-1 adducin [Rattus norvegicus]    | 21 | 4.9 | 20.99 |  |
| - | <a href="#">gi 25282431 ref NP_742044.1 </a> ELL associated factor 2 [Rattus norvegicus]  | 22 | 4.9 | 29.31 |  |

## NOTE:

1. To search again using **unmatched masses**, click the symbol .
2. Highly similar protein sequences were given the same rank (click "+" to expand/contract).

**Input Summary****Search id** A3CEBFE6-167C-53DD1A02**Sequences** 20092**Date & Time** Mon Jan 22 21:16:13 2007 UTC (Search Time: 0.42 sec.)**Sample ID****Database** NCBI nr [..\databases\nr]**Taxonomy** Rattus**Mass Range** 15 - 30 kDa**pI Range** 4.2 -6.0**Digestion** Trypsin**Missed Cuts** 1**Modifications** +C2H3ON@C(Complete); +O@M(Partial);**Charge State** MH+**Masses (avg)****Tolerance (avg)** 1.00 ppm

|                     |          |          |          |          |          |          |          |
|---------------------|----------|----------|----------|----------|----------|----------|----------|
| <b>Masses (mon)</b> | 704.157  | 704.835  | 711.453  | 717.419  | 725.725  | 726.268  | 728.262  |
|                     | 732.841  | 737.690  | 739.444  | 740.248  | 750.453  | 754.474  | 756.469  |
|                     | 764.404  | 765.446  | 772.456  | 777.510  | 784.537  | 785.442  | 788.875  |
|                     | 797.396  | 798.422  | 804.514  | 805.391  | 813.503  | 816.459  | 822.388  |
|                     | 824.472  | 831.400  | 836.877  | 849.296  | 856.012  | 856.524  | 862.242  |
|                     | 864.494  | 874.450  | 879.509  | 881.464  | 887.826  | 888.508  | 889.550  |
|                     | 893.607  | 902.516  | 904.498  | 906.441  | 912.485  | 919.366  | 920.509  |
|                     | 924.554  | 926.600  | 932.548  | 934.480  | 941.484  | 942.558  | 949.551  |
|                     | 955.489  | 961.487  | 962.488  | 968.424  | 969.471  | 975.849  | 977.615  |
|                     | 979.552  | 983.472  | 990.488  | 992.522  | 999.528  | 1009.422 | 1011.603 |
|                     | 1019.149 | 1021.556 | 1023.664 | 1028.535 | 1035.538 | 1036.577 |          |
|                     | 1038.528 | 1052.887 | 1053.585 | 1055.377 | 1057.651 | 1062.515 |          |
|                     | 1065.587 | 1071.570 | 1075.494 | 1078.585 | 1085.535 | 1091.573 |          |
|                     | 1092.684 | 1098.832 | 1104.683 | 1107.503 | 1110.595 | 1117.512 |          |
|                     | 1123.954 | 1125.399 | 1132.951 | 1133.494 | 1139.438 | 1142.438 |          |
|                     | 1148.678 | 1155.210 | 1157.498 | 1160.614 | 1166.581 | 1169.617 |          |
|                     | 1174.593 | 1175.609 | 1183.605 | 1187.544 | 1189.632 | 1196.558 |          |
|                     | 1203.552 | 1206.495 | 1214.643 | 1217.600 | 1221.454 | 1229.558 |          |
|                     | 1230.739 | 1233.715 | 1240.816 | 1241.575 | 1245.419 | 1248.556 |          |
|                     | 1253.603 | 1262.626 | 1270.721 | 1273.650 | 1281.395 | 1284.722 |          |
|                     | 1291.678 | 1294.679 | 1301.760 | 1304.578 | 1308.763 | 1315.979 |          |
|                     | 1316.712 | 1319.595 | 1326.548 | 1328.755 | 1335.928 | 1337.700 |          |
|                     | 1340.606 | 1348.651 | 1351.669 | 1358.705 | 1366.606 | 1367.651 |          |
|                     | 1373.681 | 1378.475 | 1386.533 | 1388.539 | 1391.651 | 1398.589 |          |
|                     | 1399.747 | 1403.830 | 1411.203 | 1414.745 | 1422.960 | 1428.653 |          |
|                     | 1433.745 | 1441.606 | 1444.675 | 1453.027 | 1456.570 | 1458.934 |          |
|                     | 1465.523 | 1473.677 | 1475.590 | 1480.248 | 1484.498 | 1487.612 |          |
|                     | 1500.830 | 1501.508 | 1505.737 | 1513.164 | 1514.841 | 1517.828 |          |
|                     | 1525.496 | 1529.864 | 1533.815 | 1541.206 | 1542.845 | 1550.257 |          |
|                     | 1558.113 | 1558.697 | 1560.824 | 1568.173 | 1569.186 | 1574.791 |          |
|                     | 1582.816 | 1588.821 | 1595.805 | 1597.688 | 1600.757 | 1608.740 |          |
|                     | 1610.576 | 1618.800 | 1628.131 | 1632.752 | 1640.759 | 1649.005 |          |
|                     | 1650.372 | 1658.368 | 1662.538 | 1673.095 | 1677.670 | 1685.842 |          |
|                     | 1688.884 | 1697.861 | 1699.747 | 1704.859 | 1713.320 | 1717.893 |          |
|                     | 1730.978 | 1741.639 | 1742.875 | 1751.881 | 1757.748 | 1766.906 |          |
|                     | 1769.340 | 1782.335 | 1786.317 | 1797.490 | 1805.778 | 1814.830 |          |
|                     | 1821.721 | 1832.255 | 1838.370 | 1842.587 | 1857.300 | 1865.841 |          |
|                     | 1867.586 | 1874.693 | 1886.198 | 1888.655 | 1897.151 | 1905.490 |          |
|                     | 1911.903 | 1921.868 | 1930.793 | 1934.050 | 1943.657 | 1946.745 |          |



|          |          |          |          |          |          |
|----------|----------|----------|----------|----------|----------|
| 1950.610 | 1958.946 | 1963.956 | 1972.860 | 1977.888 | 1985.922 |
| 1998.005 | 2001.920 | 2015.743 | 2024.279 | 2027.431 | 2036.720 |
| 2044.630 | 2049.993 | 2054.386 | 2063.370 | 2067.226 | 2075.809 |
| 2084.101 | 2088.346 | 2095.801 | 2120.042 | 2132.215 | 2141.680 |
| 2146.295 | 2155.916 | 2165.182 | 2169.132 | 2178.364 | 2184.907 |
| 2193.794 | 2195.876 | 2204.912 | 2206.683 | 2210.925 | 2219.865 |
| 2223.483 | 2230.094 | 2233.785 | 2245.642 | 2248.069 | 2250.752 |
| 2260.668 | 2265.987 | 2269.964 | 2283.269 | 2287.519 | 2297.710 |
| 2308.311 | 2312.909 | 2322.636 | 2326.663 | 2336.615 | 2344.110 |
| 2353.641 | 2359.788 | 2368.761 | 2371.778 | 2375.979 | 2381.037 |
| 2388.931 | 2392.027 | 2403.306 | 2412.825 | 2423.291 | 2429.529 |
| 2435.043 | 2439.232 | 2445.157 | 2456.160 | 2467.590 | 2469.597 |
| 2479.045 | 2484.347 | 2494.092 | 2497.860 | 2507.025 | 2517.017 |
| 2527.503 | 2530.145 | 2541.677 | 2546.093 | 2556.911 | 2570.416 |
| 2574.720 | 2588.477 | 2591.699 | 2600.690 | 2606.739 | 2610.041 |
| 2623.132 | 2633.905 | 2642.830 | 2661.073 | 2666.635 | 2678.124 |
| 2691.454 | 2698.796 | 2710.775 | 2722.850 | 2727.209 | 2739.038 |
| 2752.942 | 2760.155 | 2763.057 | 2768.228 | 2774.325 | 2786.184 |
| 2798.069 | 2801.989 | 2812.906 | 2815.979 | 2826.136 | 2831.006 |
| 2842.052 | 2852.328 | 2863.630 | 2875.244 | 2880.446 | 2908.192 |
| 2912.914 | 2927.977 | 2932.496 | 2956.168 | 2970.387 | 2981.404 |
| 2992.662 | 3003.794 | 3018.643 | 3039.315 | 3062.290 | 3081.390 |
| 3089.540 | 3098.599 | 3109.773 | 3120.891 | 3126.382 | 3143.488 |
| 3148.319 | 3166.014 | 3177.458 | 3191.887 | 3201.016 | 3208.100 |
| 3213.590 | 3229.857 | 3236.819 | 3256.060 | 3270.047 | 3277.205 |
| 3287.995 | 3306.301 | 3322.175 | 3339.796 | 3356.605 | 3359.957 |
| 3372.440 | 3383.304 | 3404.925 | 3414.110 | 3425.432 | 3429.052 |
| 3441.660 | 3444.973 | 3451.999 | 3464.252 | 3476.842 | 3482.154 |
| 3498.909 | 3506.465 | 3515.941 | 3521.601 | 3533.972 | 3546.204 |
| 3559.018 | 3565.192 | 3568.161 | 3574.905 | 3579.806 | 3593.724 |
| 3606.458 | 3611.058 | 3620.345 | 3628.835 | 3634.339 | 3646.817 |
| 3661.428 | 3672.242 | 3684.211 | 3687.961 |          |          |

**Tolerance** 12.00 ppm  
**(mon)**

**Number of** 434  
**Peptides**

# Laboratory of Mass Spectrometry and Gaseous Ion Chemistry

## PROWL

- ▶ **ProFound**
- ▶ **ProteinInfo**
- ▶ **PeptideMap**
- ▶ **PepFrag**
- ▶ **X! Tandem**
- ▶ **X! Hunter**
- ▶ **GPMDDB**
- ▶ **PROWL Home**
- ▶ **Chait Lab**



The Rockefeller University  
1230 York Avenue,  
New York, NY 10021  
(212) 327-8000



**National Center for  
Research Resources**

National Resource  
for the Mass Spectrometric  
Analysis of Biological  
Macromolecules

## ProFound



### Protein Candidates

| Rank | Expectation          | Protein Information and Sequence Analyse Tools (T)                                                                                                                                                                                                 | %  | pI  | kDa   | R |
|------|----------------------|----------------------------------------------------------------------------------------------------------------------------------------------------------------------------------------------------------------------------------------------------|----|-----|-------|---|
| +1   | 9.870 <sup>-11</sup> | gi 45737864 gb AAS75813.1  mitochondrial aldehyde dehydrogenase precursor [Rattus norvegicus]                                                                                                                                                      | 53 | 6.4 | 56.07 | ⊙ |
| -    | -                    | gi 25990263 gb AAM94394.2  mitochondrial aldehyde dehydrogenase [Rattus norvegicus]                                                                                                                                                                | 56 | 5.7 | 53.83 | ⊙ |
| -    | -                    | gi 16073616 gb AAK57732.1  aldehyde dehydrogenase [Rattus norvegicus]                                                                                                                                                                              | 57 | 6.1 | 48.65 | ⊙ |
| -    | -                    | gi 55742753 ref NP_001007002.1  coiled-coil domain containing 2 [Rattus norvegicus]                                                                                                                                                                | 47 | 5.7 | 69.24 | ⊙ |
| -    | -                    | gi 755493 gb AAA96350.1  rbSec1B                                                                                                                                                                                                                   | 47 | 6.3 | 69.12 | ⊙ |
| -    | -                    | gi 6981602 ref NP_037170.1  syntaxin binding protein 1 [Rattus norvegicus]                                                                                                                                                                         | 43 | 6.5 | 67.95 | ⊙ |
| -    | -                    | gi 13592101 ref NP_112388.1  syntaxin binding protein 2 [Rattus norvegicus]                                                                                                                                                                        | 45 | 6.3 | 67.13 | ⊙ |
| -    | -                    | gi 50926225 gb AAH79241.1  Similar to ALS2CR12 gene product [Rattus norvegicus]                                                                                                                                                                    | 54 | 6.1 | 48.70 | ⊙ |
| -    | -                    | gi 6166127 sp O88267 ACOT1_RAT Acyl-coenzyme A thioesterase 1 (Acyl-CoA thioesterase 1) (Inducible cytosolic acyl-coenzyme A thioester hydrolase) (Long chain acyl-CoA thioester hydrolase) (Long chain acyl-CoA hydrolase) (CTE-I) (LACH2) (ACH2) | 43 | 6.3 | 46.22 | ⊙ |
| -    | -                    | gi 40786432 ref NP_955402.1  keratin complex 2, basic, gene 8 [Rattus norvegicus]                                                                                                                                                                  | 38 | 5.8 | 54.00 | ⊙ |
| -    | -                    | gi 30352203 gb AAP31862.1  cytokeratin-8 [Rattus sp.]                                                                                                                                                                                              | 38 | 5.8 | 54.07 | ⊙ |
| -    | -                    | gi 8393668 ref NP_058989.1  KIS [Rattus norvegicus]                                                                                                                                                                                                | 39 | 5.6 | 47.11 | ⊙ |
| -    | -                    | gi 46485098 tpg DAA02218.1  TPA_exp: type II keratin Kb7 [Rattus norvegicus]                                                                                                                                                                       | 55 | 5.7 | 50.69 | ⊙ |

|   |                                |                                                                                                               |    |     |       |   |
|---|--------------------------------|---------------------------------------------------------------------------------------------------------------|----|-----|-------|---|
| - | gi 40018588 ref NP_954537.1    | UDP-N-acetyl-alpha-D-galactosamine: polypeptide N-acetylgalactosaminyltransferase 13 [Rattus norvegicus]      | 33 | 6.4 | 64.84 | 🔴 |
| - | gi 40254754 ref NP_112619.2    | occludin [Rattus norvegicus]                                                                                  | 30 | 5.9 | 59.57 | 🔴 |
| - | gi 4126665 dbj BAA36681.1      | occludin [Rattus norvegicus]                                                                                  | 30 | 5.9 | 59.60 | 🔴 |
| - | gi 40786491 ref NP_955433.1    | cytochrome P450, family 20, subfamily A, polypeptide 1 [Rattus norvegicus]                                    | 41 | 6.3 | 52.32 | 🔴 |
| - | gi 56090634 ref NP_001007663.1 | archain [Rattus norvegicus]                                                                                   | 34 | 5.9 | 57.64 | 🔴 |
| - | gi 13929056 ref NP_113940.1    | basal cell adhesion molecule [Rattus norvegicus]                                                              | 38 | 5.5 | 68.29 | 🔴 |
| - | gi 2144059 pir  I56606         | estrogen sulfotransferase isoform 3 - rat                                                                     | 55 | 5.6 | 35.77 | 🔴 |
| - | gi 50927747 gb AAH79240.1      | Similar to Murine homolog of human ftp-3 [Rattus norvegicus]                                                  | 37 | 5.9 | 49.56 | 🔴 |
| - | gi 32363191 sp Q63648 MERL_RAT | Merlin (Moesin-ezrin-radixin-like protein) (Neurofibromin-2) (Schwannomin)                                    | 36 | 6.2 | 68.98 | 🔴 |
| - | gi 543840 sp P36407 ARD1_RAT   | GTP-binding protein ARD-1 (ADP-ribosylation factor domain protein 1) (Tripartite motif-containing protein 23) | 33 | 5.9 | 63.71 | 🔴 |
| - | gi 54673782 gb AAH85124.1      | LOC501069 protein [Rattus norvegicus]                                                                         | 37 | 5.6 | 68.82 | 🔴 |
| - | gi 21955134 ref NP_665715.1    | dynein, cytoplasmic, light intermediate chain 1 [Rattus norvegicus]                                           | 45 | 6.1 | 57.00 | 🔴 |
| - | gi 40804381 gb AAR91694.1      | ezrin [Rattus norvegicus]                                                                                     | 29 | 5.8 | 69.50 | 🔴 |
| - | gi 19705559 ref NP_599246.1    | Hspb associated protein 1 [Rattus norvegicus]                                                                 | 39 | 6.5 | 49.75 | 🔴 |
| - | gi 1778213 gb AAC53362.1       | chaperonin 60 [Rattus norvegicus]                                                                             | 33 | 5.8 | 61.05 | 🔴 |
| - | gi 1845602 gb AAC53134.1       | outer dense fiber protein [Rattus norvegicus]                                                                 | 32 | 6.1 | 69.28 | 🔴 |
| - | gi 21728414 ref NP_663716.1    | protein-tyrosine phosphatase, non-receptor type 7 [Rattus norvegicus]                                         | 36 | 6.4 | 40.81 | 🔴 |
| - | gi 11560024 ref NP_071565.1    | heat shock protein 1 (chaperonin) [Rattus norvegicus]                                                         | 33 | 5.9 | 61.12 | 🔴 |

|   |                                                                                                                                                                                                                                  |    |     |       |   |
|---|----------------------------------------------------------------------------------------------------------------------------------------------------------------------------------------------------------------------------------|----|-----|-------|---|
| - | gi 51702230 sp P63039 CH60_RAT 60 kDa heat shock protein, mitochondrial precursor (Hsp60) (60 kDa chaperonin) (CPN60) (Heat shock protein 60) (HSP-60) (Mitochondrial matrix protein P1) (HSP-65)                                | 33 | 5.9 | 61.11 | 🔴 |
| - | gi 34098962 ref NP_036753.3  6-phosphofructo-2-kinase/fructose-2,6-biphosphatase 1 [Rattus norvegicus]                                                                                                                           | 36 | 6.3 | 55.38 | 🔴 |
| - | gi 1711602 sp P49890 ST1E6_RAT Estrogen sulfotransferase, isoform 6 (EST-6) (Sulfotransferase, estrogen-preferring) (Estrone sulfotransferase)                                                                                   | 50 | 5.6 | 35.63 | 🔴 |
| - | gi 56485 emb CAA47838.1  class I MHC [Rattus norvegicus]                                                                                                                                                                         | 46 | 6.2 | 40.08 | 🔴 |
| - | gi 56585031 gb AAH87631.1  TRNA splicing endonuclease 2 homolog (S. cerevisiae) [Rattus norvegicus]                                                                                                                              | 44 | 5.8 | 53.39 | 🔴 |
| - | gi 119751 sp P07953 F261_RAT 6-phosphofructo-2-kinase/fructose-2,6-biphosphatase 1 (6PF-2-K/Fru-2,6-P2ASE liver isozyme) [Includes: 6-phosphofructo-2-kinase ; Fructose-2,6-bisphosphatase ]                                     | 33 | 6.3 | 55.32 | 🔴 |
| - | gi 55824739 gb AAH86579.1  Akr1c18 protein [Rattus norvegicus]                                                                                                                                                                   | 45 | 5.6 | 39.45 | 🔴 |
| - | gi 52138521 ref NP_062230.1  ezrin [Rattus norvegicus]                                                                                                                                                                           | 29 | 5.8 | 69.49 | 🔴 |
| - | gi 14916547 sp O35824 DNJA2_RAT DnaJ homolog subfamily A member 2 (RDJ2)                                                                                                                                                         | 43 | 6.1 | 46.38 | 🔴 |
| - | gi 56799412 ref NP_114468.2  DnaJ (Hsp40) homolog, subfamily A, member 2 [Rattus norvegicus]                                                                                                                                     | 43 | 6.1 | 46.36 | 🔴 |
| - | gi 34872065 ref XP_239639.2  PREDICTED: similar to Matrix metalloproteinase-17 precursor (MMP-17) (Membrane-type matrix metalloproteinase 4) (MT-MMP 4) (Membrane-type-4 matrix metalloproteinase) (MT4-MMP) [Rattus norvegicus] | 24 | 5.9 | 65.66 | 🔴 |
| - | gi 6978503 ref NP_036955.1  Annexin III (Lipocortin III) [Rattus norvegicus]                                                                                                                                                     | 54 | 6.0 | 36.53 | 🔴 |
| - | gi 129372 sp P10361 P53_RAT Cellular tumor antigen p53 (Tumor suppressor p53)                                                                                                                                                    | 45 | 6.2 | 44.06 | 🔴 |
| - | gi 13591878 ref NP_112251.1  tumor protein p53 [Rattus norvegicus]                                                                                                                                                               | 45 | 6.2 | 44.09 | 🔴 |
| - | gi 71766 pir  LURT3 annexin III - rat                                                                                                                                                                                            | 54 | 6.0 | 36.57 | 🔴 |

|   |                                                                                                                                                                                        |    |     |       |   |
|---|----------------------------------------------------------------------------------------------------------------------------------------------------------------------------------------|----|-----|-------|---|
| - | gi 34852984 ref XP_231046.2  PREDICTED: similar to Negative elongation factor B (NELF-B) [Rattus norvegicus]                                                                           | 32 | 5.7 | 66.24 | 🔴 |
| - | gi 56972637 gb AAH88184.1  LOC366747 protein [Rattus norvegicus]                                                                                                                       | 44 | 6.3 | 65.84 | 🔴 |
| - | gi 1166528 gb AAC52417.1  ksGC                                                                                                                                                         | 41 | 6.2 | 48.66 | 🔴 |
| - | gi 17902245 gb AAL47844.1 AF450298_1 EZRIN [Rattus norvegicus]                                                                                                                         | 32 | 6.2 | 54.27 | 🔴 |
| - | gi 7434494 pir  S77704 6-phosphofructo-2-kinase (EC 2.7.1.105) / fructose-2, 6-bisphosphate 2-phosphatase (EC 3.1.3.46) clone 5c, skeletal muscle - rat                                | 35 | 6.4 | 54.83 | 🔴 |
| - | gi 42476092 ref NP_446421.2  G protein pathway suppressor 1 [Rattus norvegicus]                                                                                                        | 34 | 6.4 | 53.99 | 🔴 |
| - | gi 2494624 sp P97834 CSN1_RAT COP9 signalosome complex subunit 1 (Signalosome subunit 1) (SGN1) (JAB1-containing signalosome subunit 1) (G protein pathway suppressor 1) (MFH protein) | 34 | 6.4 | 53.98 | 🔴 |
| - | gi 1711599 sp P52844 ST1E1_RAT Estrogen sulfotransferase, isoform 1 (EST-1) (Sulfotransferase, estrogen-preferring) (Estrone sulfotransferase)                                         | 40 | 5.8 | 35.83 | 🔴 |
| - | gi 13540689 ref NP_110490.1  moesin [Rattus norvegicus]                                                                                                                                | 26 | 6.2 | 67.89 | 🔴 |
| - | gi 57012382 ref NP_001008811.1  type II keratin Kb25 [Rattus norvegicus]                                                                                                               | 33 | 6.3 | 54.65 | 🔴 |
| - | gi 5030428 gb AAD01874.2  glial fibrillary acidic protein delta [Rattus norvegicus]                                                                                                    | 31 | 5.7 | 48.82 | 🔴 |
| - | gi 56090198 ref NP_001007719.1  estrogen sulfotransferase [Rattus norvegicus]                                                                                                          | 47 | 5.8 | 35.69 | 🔴 |
| - | gi 56605726 ref NP_001008325.1  eukaryotic translation initiation factor 4B [Rattus norvegicus]                                                                                        | 33 | 5.6 | 69.16 | 🔴 |
| - | gi 56922 emb CAA33606.1  unnamed protein product [Rattus norvegicus]                                                                                                                   | 34 | 6.0 | 52.62 | 🔴 |
| - | gi 1934603 gb AAB51724.1  RN protein [Rattus norvegicus]                                                                                                                               | 41 | 6.1 | 38.05 | 🔴 |
| - | gi 53734490 gb AAH83578.1  Zinc finger protein 143 [Rattus norvegicus]                                                                                                                 | 25 | 5.7 | 68.51 | 🔴 |
| - | gi 33086640 gb AAP92632.1  Ba1-647 [Rattus norvegicus]                                                                                                                                 | 35 | 6.1 | 43.08 | 🔴 |

|   |                                                                                                                                        |    |     |       |  |
|---|----------------------------------------------------------------------------------------------------------------------------------------|----|-----|-------|--|
| - | <a href="#">gi 38512106 gb AAH61756.1 </a> Ribophorin I [Rattus norvegicus]                                                            | 35 | 6.1 | 68.50 |  |
| - | <a href="#">gi 6981486 ref NP_037199.1 </a> ribophorin I [Rattus norvegicus]                                                           | 36 | 6.1 | 68.40 |  |
| - | <a href="#">gi 56605698 ref NP_001008309.1 </a> hypothetical protein<br>LOC294390 [Rattus norvegicus]                                  | 35 | 6.1 | 67.02 |  |
| - | <a href="#">gi 205578 gb AAA41654.1 </a> cardiac myosin heavy chain 5                                                                  | 30 | 5.5 | 47.89 |  |
| - | <a href="#">gi 55742713 ref NP_446334.1 </a> extracellular matrix protein 1<br>[Rattus norvegicus]                                     | 30 | 6.4 | 64.89 |  |
| - | <a href="#">gi 13592025 ref NP_112344.1 </a> protein<br>geranylgeranyltransferase type I, beta subunit [Rattus<br>norvegicus]          | 33 | 6.2 | 43.25 |  |
| - | <a href="#">gi 56605800 ref NP_001008363.1 </a> vav-1 interacting Kruppel-<br>like protein [Rattus norvegicus]                         | 28 | 6.5 | 64.84 |  |
| - | <a href="#">gi 55741518 ref NP_001006987.1 </a> evolutionarily conserved<br>signaling intermediate in Toll pathway [Rattus norvegicus] | 24 | 6.0 | 49.89 |  |

## NOTE:

1. To search again using **unmatched masses**, click the symbol .
2. Highly similar protein sequences were given the same rank (click "+" to expand/contract).

**Input Summary****Search id** B62693C1-0424-B6E28E5A**Sequences** 20092**Date & Time** Tue Jan 23 01:42:50 2007 UTC (Search Time: 0.61 sec.)**Sample ID****Database** NCBI nr [..\databases\nr]**Taxonomy** Rattus**Mass Range** 35 - 70 kDa**pI Range** 5.5 -6.5**Digestion** Trypsin**Missed Cuts** 1**Modifications** +C2H3ON@C(Complete); +O@M(Partial); +HPO3@STY(Partial);**Charge State** MH+**Masses (avg)**

**Tolerance (avg)** 1.00 ppm

**Masses (mon)** 706.461 711.651 717.473 719.419 726.250 728.425 733.405  
735.372 740.522 741.290 750.544 751.428 753.346 755.487  
764.309 767.435 772.471 778.425 780.452 784.439 790.477  
791.347 794.414 800.946 802.393 808.423 811.446 817.857  
818.472 820.435 824.022 829.513 835.489 836.889 848.445  
851.464 857.519 863.872 864.505 866.404 875.454 881.914  
882.473 889.319 890.482 902.525 908.394 910.666 916.521  
922.558 923.416 929.517 930.542 936.461 938.479 940.459  
944.506 951.548 952.544 958.949 960.366 963.871 964.623  
969.518 972.494 978.755 980.398 983.855 990.492 996.471  
997.533 1003.363 1005.452 1012.504 1018.850 1019.537  
1025.819 1027.457 1028.449 1034.499 1038.528 1040.610  
1052.449 1053.541 1059.445 1060.540 1066.640 1067.563  
1074.565 1076.507 1082.873 1083.538 1089.792 1090.547  
1092.548 1098.516 1100.613 1107.543 1113.552 1115.529  
1122.597 1128.963 1130.546 1134.576 1136.617 1142.613  
1145.617 1148.580 1155.889 1156.712 1163.542 1164.598  
1170.576 1177.677 1184.615 1186.561 1194.641 1201.581  
1208.683 1212.616 1215.711 1222.807 1224.643 1227.565  
1233.655 1240.566 1248.638 1255.591 1264.668 1267.637  
1271.570 1281.572 1283.596 1290.646 1297.909 1303.735  
1311.035 1312.790 1319.675 1321.778 1329.423 1330.797  
1335.515 1339.650 1343.742 1352.588 1355.709 1359.726  
1370.518 1373.659 1381.002 1381.653 1385.758 1391.778  
1398.616 1400.731 1407.742 1418.723 1423.696 1432.700  
1435.759 1441.733 1453.256 1457.672 1467.041 1468.846  
1470.704 1478.251 1482.498 1487.738 1489.867 1492.726  
1499.704 1501.529 1506.750 1508.737 1513.708 1520.787  
1521.470 1528.672 1531.726 1539.693 1542.652 1545.721  
1552.980 1553.723 1560.735 1568.937 1569.683 1576.732  
1583.797 1587.817 1591.682 1599.803 1607.458 1610.699  
1621.740 1630.644 1634.779 1635.759 1643.718 1648.744  
1656.735 1665.790 1668.814 1671.785 1680.715 1686.737  
1695.874 1698.758 1708.762 1710.822 1714.778 1723.822  
1724.997 1729.865 1733.563 1741.758 1752.846 1759.787  
1763.686 1771.668 1776.773 1784.728 1789.794 1798.749  
1806.811 1810.762 1812.768 1821.723 1829.663 1835.774  
1844.034 1852.486 1859.099 1865.956 1874.809 1878.892

|          |          |          |          |          |          |
|----------|----------|----------|----------|----------|----------|
| 1881.988 | 1890.819 | 1901.726 | 1903.724 | 1912.783 | 1921.746 |
| 1931.380 | 1936.059 | 1941.870 | 1946.858 | 1955.782 | 1961.146 |
| 1967.174 | 1973.929 | 1982.794 | 1988.796 | 1996.852 | 1999.200 |
| 2004.804 | 2013.255 | 2016.036 | 2023.056 | 2031.303 | 2033.124 |
| 2037.985 | 2046.872 | 2050.896 | 2059.321 | 2068.193 | 2074.997 |
| 2084.948 | 2094.182 | 2098.006 | 2101.832 | 2112.899 | 2121.886 |
| 2127.846 | 2141.412 | 2152.146 | 2161.841 | 2164.473 | 2175.515 |
| 2179.852 | 2190.052 | 2199.517 | 2209.635 | 2212.042 | 2219.777 |
| 2227.399 | 2232.996 | 2243.958 | 2248.043 | 2257.120 | 2259.617 |
| 2269.039 | 2273.147 | 2276.488 | 2286.073 | 2297.035 | 2300.199 |
| 2307.182 | 2317.156 | 2320.399 | 2329.752 | 2332.874 | 2336.193 |
| 2345.382 | 2348.644 | 2352.040 | 2356.746 | 2366.958 | 2377.717 |
| 2386.922 | 2394.693 | 2404.723 | 2413.979 | 2417.422 | 2426.703 |
| 2437.331 | 2440.325 | 2454.118 | 2464.672 | 2473.641 | 2478.064 |
| 2487.729 | 2491.830 | 2501.723 | 2504.284 | 2513.865 | 2517.783 |
| 2527.390 | 2532.946 | 2548.358 | 2553.188 | 2564.225 | 2576.791 |
| 2588.838 | 2598.304 | 2609.164 | 2618.115 | 2630.950 | 2635.235 |
| 2638.832 | 2642.431 | 2658.101 | 2668.249 | 2679.950 | 2691.816 |
| 2697.129 | 2710.155 | 2716.890 | 2722.790 | 2734.328 | 2737.357 |
| 2748.572 | 2760.942 | 2769.865 | 2780.010 | 2792.024 | 2802.493 |
| 2807.344 | 2814.769 | 2818.199 | 2830.079 | 2840.261 | 2848.592 |
| 2860.535 | 2869.040 | 2879.724 | 2889.343 | 2899.050 | 2908.119 |
| 2919.166 | 2931.327 | 2945.194 | 2956.823 | 2967.228 | 2977.210 |
| 2984.340 | 2990.153 | 3002.386 | 3009.471 | 3021.743 | 3027.369 |
| 3033.372 | 3042.201 | 3055.952 | 3067.646 | 3074.060 | 3086.461 |
| 3092.595 | 3108.334 | 3115.992 | 3131.186 | 3141.888 | 3153.365 |
| 3156.766 | 3167.890 | 3179.412 | 3193.845 | 3199.093 | 3211.663 |
| 3225.249 | 3239.476 | 3250.665 | 3253.734 | 3262.795 | 3268.407 |
| 3277.103 | 3289.127 | 3302.099 | 3314.477 | 3318.195 | 3332.000 |
| 3343.499 | 3354.083 | 3366.165 | 3379.363 | 3384.366 | 3396.580 |
| 3399.872 | 3417.140 | 3421.700 | 3434.294 | 3445.647 | 3449.278 |
| 3460.971 | 3465.401 | 3470.308 | 3485.051 | 3495.849 | 3499.982 |
| 3510.166 | 3522.596 | 3534.489 | 3538.244 | 3549.922 | 3555.047 |
| 3567.233 | 3579.117 | 3591.906 | 3595.047 | 3609.234 | 3615.612 |
| 3630.566 | 3644.821 | 3652.526 | 3663.001 | 3676.014 | 3689.864 |
| 3695.820 |          |          |          |          |          |

**Tolerance** 38.00 ppm  
**(mon)**



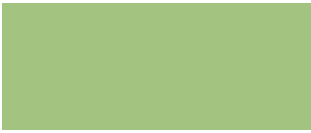

**Number of** 449  
**Peptides**

# Laboratory of Mass Spectrometry and Gaseous Ion Chemistry

## PROWL

- ▶ **ProFound**
- ▶ **ProteinInfo**
- ▶ **PeptideMap**
- ▶ **PepFrag**
- ▶ **X! Tandem**
- ▶ **X! Hunter**
- ▶ **GPMDB**
- ▶ **PROWL Home**
- ▶ **Chait Lab**



The Rockefeller University  
1230 York Avenue,  
New York, NY 10021  
(212) 327-8000



**National Center for  
Research Resources**

National Resource  
for the Mass Spectrometric  
Analysis of Biological  
Macromolecules

## ProFound

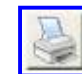

### Protein Candidates

| Rank | Expectation          | Protein Information and Sequence Analyse Tools (T)                                                                | %  | pI  | kDa   | R |
|------|----------------------|-------------------------------------------------------------------------------------------------------------------|----|-----|-------|---|
| +1   | 2.5×10 <sup>-9</sup> | gi 33086650 gb AAP92637.1  Cb1-812 [Rattus norvegicus]                                                            | 47 | 6.8 | 30.53 | ⊙ |
|      | -                    | gi 12585364 sp Q9Z0T0 TPMT_RAT Thiopurine S-methyltransferase (Thiopurine methyltransferase)                      | 35 | 6.3 | 27.96 | ⊙ |
| 2    | 2.8×10 <sup>-7</sup> | gi 51980519 gb AAH82050.1  Nudt18 protein [Rattus norvegicus]                                                     | 48 | 6.3 | 36.48 | ⊙ |
|      | -                    | gi 25992750 gb AAN77242.1  immunophilin XAP2 [Rattus norvegicus]                                                  | 38 | 6.1 | 38.05 | ⊙ |
|      | -                    | gi 56789141 gb AAH88125.1  Sulfotransferase family, cytosolic, 1C, member 1 [Rattus norvegicus]                   | 48 | 6.1 | 35.87 | ⊙ |
|      | -                    | gi 204655 gb AAA41348.1  haptoglobin (Hp)                                                                         | 27 | 6.3 | 39.11 | ⊙ |
|      | -                    | gi 38194517 gb AAR13265.1  GP49B2 [Rattus norvegicus]                                                             | 44 | 6.3 | 38.72 | ⊙ |
|      | -                    | gi 585574 sp P37805 TAGL3_RAT Transgelin-3 (Neuronal protein NP25)                                                | 53 | 6.5 | 24.98 | ⊙ |
|      | -                    | gi 13929030 ref NP_113920.1  sulfotransferase family 1A, member 2 [Rattus norvegicus]                             | 41 | 6.1 | 35.86 | ⊙ |
|      | -                    | gi 19550353 gb AAL91351.1  serum- and glucocorticoid-inducible kinase 2-related [Rattus norvegicus]               | 35 | 6.9 | 34.95 | ⊙ |
|      | -                    | gi 7245844 pdb 1C9L A Chain A, Peptide-In-Groove Interactions Link Target Proteins To The B-Propeller Of Clathrin | 52 | 6.5 | 39.98 | ⊙ |
|      | -                    | gi 56090453 ref NP_001007724.1  5'-nucleotidase, cytosolic III-like [Rattus norvegicus]                           | 34 | 6.3 | 33.96 | ⊙ |
|      | -                    | gi 1351280 sp P48500 TPIS_RAT Triosephosphate isomerase (TIM) (Triose-phosphate isomerase)                        | 51 | 6.5 | 27.42 | ⊙ |
|      | -                    | gi 38512111 gb AAH61781.1  Tpi1 protein [Rattus norvegicus]                                                       | 52 | 7.1 | 27.21 | ⊙ |

|   |                                                                                                                                                                           |    |     |       |   |
|---|---------------------------------------------------------------------------------------------------------------------------------------------------------------------------|----|-----|-------|---|
| - | <a href="#">gi 27465551 ref NP_775133.1 </a> prolactin-like protein C related [Rattus norvegicus]                                                                         | 42 | 6.9 | 23.93 | 🔴 |
| - | <a href="#">gi 11560081 ref NP_071598.1 </a> translin-associated factor X [Rattus norvegicus]                                                                             | 41 | 6.1 | 33.10 | 🔴 |
| - | <a href="#">gi 420272 pir  E42148</a> GTP-binding protein rab14 - rat                                                                                                     | 54 | 5.8 | 24.08 | 🔴 |
| - | <a href="#">gi 31324556 ref NP_852143.1 </a> retinol dehydrogenase 10 (all-trans) [Rattus norvegicus]                                                                     | 32 | 7.2 | 38.73 | 🔴 |
| - | <a href="#">gi 57164003 ref NP_001009175.1 </a> tripartite motif-containing 40 [Rattus norvegicus]                                                                        | 47 | 6.8 | 29.11 | 🔴 |
| - | <a href="#">gi 27695760 ref XP_215692.1 </a> PREDICTED: similar to myozenin 2 [Rattus norvegicus]                                                                         | 35 | 7.0 | 29.83 | 🔴 |
| - | <a href="#">gi 123513 sp P06866 HPT_RAT</a> Haptoglobin precursor [Contains: Haptoglobin alpha chain; Haptoglobin beta chain]                                             | 22 | 6.1 | 39.04 | 🔴 |
| - | <a href="#">gi 56789734 gb AAH88443.1 </a> Similar to RAB19, member RAS oncogene family [Rattus norvegicus]                                                               | 45 | 6.1 | 24.66 | 🔴 |
| - | <a href="#">gi 28933457 ref NP_803175.1 </a> glutathione S-transferase, mu 2 [Rattus norvegicus]                                                                          | 47 | 6.9 | 25.86 | 🔴 |
| - | <a href="#">gi 39930501 ref NP_446228.1 </a> zuotin related factor 2 [Rattus norvegicus]                                                                                  | 34 | 6.2 | 32.83 | 🔴 |
| - | <a href="#">gi 55670081 pdb 1TZD A</a> Chain A, Crystal Structure Of The Catalytic Core Of Inositol 1,4,5- Trisphosphate 3-Kinase                                         | 24 | 6.3 | 30.82 | 🔴 |
| - | <a href="#">gi 13124592 sp Q9JI51 VTI1A_RAT</a> Vesicle transport through interaction with t-SNAREs homolog 1A (Vesicle transport v-SNARE protein Vti1-like 2) (Vti1-rp2) | 52 | 6.1 | 26.02 | 🔴 |
| - | <a href="#">gi 46237562 emb CAE83942.1 </a> proteasome (prosome, macropain) subunit, beta type, 8 [Rattus norvegicus]                                                     | 46 | 7.0 | 30.84 | 🔴 |
| - | <a href="#">gi 2351075 dbj BAA22048.1 </a> 6-phosphofructo-2-kinase/fructose-2, 6-bisphosphatase [Rattus norvegicus]                                                      | 31 | 6.2 | 36.58 | 🔴 |
| - | <a href="#">gi 16758368 ref NP_446041.1 </a> RAB14, member RAS oncogene family [Rattus norvegicus]                                                                        | 47 | 5.8 | 24.14 | 🔴 |
| - | <a href="#">gi 38532559 gb AAR23524.1 </a> triosephosphate isomerase [Rattus norvegicus]                                                                                  | 46 | 6.5 | 27.31 | 🔴 |
| - | <a href="#">gi 1584427 prf  2123218B</a> corticoliberin-binding protein                                                                                                   | 31 | 6.1 | 36.72 | 🔴 |

|   |                                                                                        |    |     |       |                                                                                     |
|---|----------------------------------------------------------------------------------------|----|-----|-------|-------------------------------------------------------------------------------------|
| - | <a href="#">gi 14249130 ref NP_116002.1 </a> LIM and SH3 protein 1 [Rattus norvegicus] | 18 | 6.6 | 30.35 |   |
| - | <a href="#">gi 3493247 gb AAC33331.1 </a> MHC class I antigen [Rattus norvegicus]      | 21 | 6.4 | 39.56 |  |
| - | <a href="#">gi 16758434 ref NP_446078.1 </a> D-amino acid oxidase [Rattus norvegicus]  | 24 | 6.7 | 39.14 |  |

## NOTE:

1. To search again using **unmatched masses**, click the symbol .
2. Highly similar protein sequences were given the same rank (click "+" to expand/contract).

**Input Summary****Search id** B5D1CFAD-0478-65E12C06**Sequences** 20092**Date & Time** Tue Jan 23 15:38:02 2007 UTC (Search Time: 0.55 sec.)**Sample ID****Database** NCBI nr [..\databases\nr]**Taxonomy** Rattus**Mass Range** 20 - 40 kDa**pI Range** 5.8 -7.2**Digestion** Trypsin**Missed Cuts** 1**Modifications** +C2H3ON@C(Complete); +O@M(Partial); +HPO3@STY(Partial);**Charge State** MH+**Masses (avg)****Tolerance (avg)** 1.00 ppm

**Masses (mon)** 710.408 717.448 723.403 728.365 733.490 735.495 740.389  
742.476 746.438 751.442 756.464 763.396 765.366 767.451  
770.508 776.830 777.429 778.517 785.399 787.511 795.456  
797.392 802.451 807.411 814.419 820.303 822.461 826.477  
832.482 838.586 840.573 849.488 850.508 856.520 862.554  
863.502 875.521 881.821 882.620 884.579 887.502 891.474  
903.565 905.466 911.630 914.557 921.363 926.598 933.491  
934.518 941.606 945.532 948.471 954.572 955.529 962.528  
964.617 967.502 973.538 979.550 989.556 996.552 999.485  
1009.592 1010.576 1017.045 1017.560 1020.524 1025.516  
1032.595 1037.574 1044.172 1053.586 1060.586 1067.609  
1068.577 1075.582 1082.567 1088.597 1089.529 1091.618  
1098.565 1100.573 1104.595 1107.549 1113.558 1125.581  
1126.529 1130.598 1136.625 1141.530 1148.543 1149.593  
1155.624 1164.562 1167.550 1174.642 1177.596 1185.553  
1192.654 1193.630 1194.607 1201.642 1210.569 1213.568  
1221.035 1221.599 1226.591 1231.640 1234.712 1242.006  
1243.619 1254.656 1262.630 1270.678 1277.741 1284.775  
1285.644 1292.651 1300.552 1302.688 1308.671 1312.813  
1320.628 1327.682 1335.639 1337.706 1348.559 1349.548  
1357.720 1366.663 1368.654 1375.685 1377.733 1382.684  
1391.708 1396.685 1405.200 1405.704 1411.666 1419.720  
1427.898 1434.774 1443.507 1450.728 1452.728 1460.229  
1460.744 1463.729 1469.762 1475.807 1482.745 1489.752  
1502.092 1502.771 1515.742 1522.721 1523.772 1529.769  
1537.784 1539.791 1547.090 1547.778 1554.725 1561.794  
1565.840 1568.771 1578.813 1580.740 1586.794 1593.720  
1596.732 1600.824 1608.860 1609.724 1614.861 1624.832  
1634.724 1638.865 1646.887 1650.769 1653.834 1660.796  
1669.642 1675.810 1683.867 1692.775 1700.818 1707.766  
1716.849 1726.011 1727.914 1732.114 1734.862 1742.891  
1751.221 1757.934 1766.922 1772.871 1774.913 1784.058  
1787.814 1791.688 1800.306 1800.877 1803.850 1813.873  
1818.809 1821.912 1830.371 1831.870 1838.908 1847.234  
1847.928 1856.390 1858.073 1864.871 1867.955 1876.988  
1878.855 1887.037 1888.909 1897.289 1905.569 1906.804  
1916.874 1926.852 1936.381 1938.041 1943.559 1947.896  
1957.954 1959.981 1968.876 1971.985 1979.947 1982.945  
1995.981 2004.957 2007.973 2016.371 2018.912 2021.940

|          |          |          |          |          |          |
|----------|----------|----------|----------|----------|----------|
| 2032.066 | 2036.136 | 2041.001 | 2048.920 | 2061.926 | 2067.925 |
| 2076.693 | 2080.684 | 2095.641 | 2106.013 | 2114.366 | 2118.518 |
| 2122.984 | 2132.242 | 2144.575 | 2154.880 | 2163.893 | 2167.780 |
| 2174.056 | 2184.054 | 2186.509 | 2191.930 | 2194.958 | 2203.992 |
| 2207.977 | 2211.080 | 2220.909 | 2222.813 | 2230.123 | 2234.005 |
| 2242.928 | 2244.204 | 2254.681 | 2262.107 | 2266.082 | 2273.012 |
| 2283.299 | 2286.132 | 2295.804 | 2309.702 | 2313.005 | 2321.110 |
| 2330.660 | 2337.168 | 2347.338 | 2350.342 | 2352.432 | 2356.092 |
| 2367.221 | 2376.274 | 2380.282 | 2383.898 | 2393.510 | 2396.082 |
| 2398.983 | 2408.229 | 2410.147 | 2419.150 | 2424.188 | 2433.881 |
| 2436.141 | 2444.992 | 2454.260 | 2465.618 | 2469.231 | 2472.781 |
| 2479.551 | 2482.906 | 2490.496 | 2502.006 | 2509.018 | 2519.150 |
| 2524.900 | 2537.573 | 2547.082 | 2556.337 | 2562.402 | 2576.058 |
| 2580.983 | 2593.109 | 2603.684 | 2606.709 | 2612.214 | 2618.000 |
| 2627.106 | 2633.185 | 2644.256 | 2657.294 | 2663.964 | 2672.174 |
| 2682.070 | 2688.632 | 2705.140 | 2717.062 | 2729.855 | 2734.079 |
| 2740.351 | 2752.421 | 2754.612 | 2759.916 | 2764.871 | 2776.072 |
| 2786.727 | 2792.275 | 2799.254 | 2809.739 | 2813.237 | 2825.251 |
| 2838.725 | 2844.396 | 2858.563 | 2869.229 | 2873.126 | 2883.530 |
| 2889.173 | 2900.258 | 2904.247 | 2929.556 | 2932.983 | 2940.498 |
| 2950.583 | 2953.656 | 2957.170 | 2968.456 | 2982.852 | 2992.934 |
| 3006.059 | 3011.598 | 3022.691 | 3032.247 | 3044.936 | 3056.089 |
| 3062.343 | 3065.920 | 3076.812 | 3088.321 | 3091.538 | 3094.608 |
| 3098.952 | 3110.653 | 3116.361 | 3124.707 | 3129.599 | 3142.412 |
| 3145.581 | 3154.192 | 3167.357 | 3179.032 | 3189.511 | 3203.053 |
| 3209.605 | 3223.036 | 3234.657 | 3243.233 | 3256.733 | 3259.804 |
| 3271.336 | 3276.109 | 3291.836 | 3303.732 | 3311.932 | 3327.277 |
| 3338.925 | 3345.378 | 3357.290 | 3363.371 | 3377.893 | 3383.523 |
| 3395.265 | 3397.538 | 3414.567 | 3429.982 | 3434.708 | 3438.649 |
| 3443.538 | 3457.120 | 3470.411 | 3481.506 | 3488.330 | 3502.314 |
| 3515.689 | 3522.784 | 3526.375 | 3531.803 | 3540.113 | 3547.312 |
| 3557.002 | 3561.250 | 3577.785 | 3590.332 | 3603.060 | 3608.302 |
| 3626.317 | 3634.733 | 3648.510 | 3656.057 | 3668.652 | 3680.209 |
| 3693.008 | 3695.537 |          |          |          |          |

**Tolerance** 25.00 ppm  
**(mon)**

**Number of** 443  
**Peptides**



# Laboratory of Mass Spectrometry and Gaseous Ion Chemistry

## PROWL

- ▶ **ProFound**
- ▶ **ProteinInfo**
- ▶ **PeptideMap**
- ▶ **PepFrag**
- ▶ **X! Tandem**
- ▶ **X! Hunter**
- ▶ **GPMDDB**
- ▶ **PROWL Home**
- ▶ **Chait Lab**

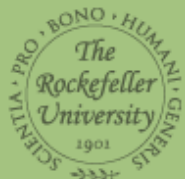

The Rockefeller University  
1230 York Avenue,  
New York, NY 10021  
(212) 327-8000



**National Center for  
Research Resources**

National Resource  
for the Mass Spectrometric  
Analysis of Biological  
Macromolecules

## ProFound



### Protein Candidates

| Rank | Expectation           | Protein Information and Sequence Analyse Tools (T)                                                   | %  | pI  | kDa   | R |
|------|-----------------------|------------------------------------------------------------------------------------------------------|----|-----|-------|---|
| +1   | 5.7×10 <sup>-29</sup> | gi 204499 gb AAA41285.1  glutathione S-transferase Y-b subunit (EC 2.5.1.18)                         | 26 | 7.9 | 22.04 | ⊙ |
|      | -                     | gi 207692 gb AAA42351.1  glutathione S-transferase Yb2 subunit                                       | 25 | 7.0 | 23.01 | ⊙ |
|      | -                     | gi 28933457 ref NP_803175.1  glutathione S-transferase, mu 2 [Rattus norvegicus]                     | 22 | 6.9 | 25.86 | ⊙ |
|      | -                     | gi 33356830 pdb 1B4P A Chain A, Crystal Structures Of Class Mu Chimeric Gst Isoenzymes M1-2 And M2-1 | 17 | 8.6 | 25.86 | ⊙ |
| 2    | 6.4×10 <sup>-18</sup> | gi 22074155 gb AAK95857.1  retinol dehydrogenase similar protein [Rattus norvegicus]                 | 20 | 9.0 | 20.33 | ⊙ |
| 3    | 4.2×10 <sup>-12</sup> | gi 554403 gb AAA79025.1  alpha-1-inhibitor III                                                       | 24 | 6.9 | 16.46 | ⊙ |
| 4    | 4.6×10 <sup>-11</sup> | gi 27674205 ref XP_213416.1  PREDICTED: similar to sperm acrosome associated 3 [Rattus norvegicus]   | 17 | 6.4 | 18.86 | ⊙ |
| 5    | 6.2×10 <sup>-11</sup> | gi 2443209 dbj BAA22285.1  c-met/hepatocyte growth factor receptor [Rattus norvegicus]               | 17 | 8.2 | 15.34 | ⊙ |
| 6    | 2.0×10 <sup>-10</sup> | gi 16258813 ref NP_434688.1  von Hippel-Lindau syndrome homolog [Rattus norvegicus]                  | 12 | 6.1 | 21.31 | ⊙ |
| 7    | 2.5×10 <sup>-10</sup> | gi 32527713 gb AAP86258.1  Ac2-032 [Rattus norvegicus]                                               | 21 | 8.0 | 15.94 | ⊙ |
| 8    | 4.6×10 <sup>-10</sup> | gi 42558275 ref NP_973717.1  pyroglutamyl-peptidase I [Rattus norvegicus]                            | 12 | 5.3 | 23.41 | ⊙ |
| 9    | 8.7×10 <sup>-10</sup> | gi 41349751 dbj BAD08305.1  core binding factor alpha1 subunit type I [Rattus norvegicus]            | 18 | 6.8 | 16.62 | ⊙ |
| 10   | 1.0×10 <sup>-9</sup>  | gi 6114760 emb CAB59427.1  phosphodiesterase I/nucleotide pyrophosphatase [Rattus norvegicus]        | 17 | 5.5 | 17.54 | ⊙ |
| 11   | 1.3×10 <sup>-9</sup>  | gi 16758194 ref NP_445905.1  regulator of G-protein signaling 2 [Rattus norvegicus]                  | 9  | 9.2 | 24.59 | ⊙ |



|    |                      |                                                                                                                                                                                                                         |    |     |       |  |
|----|----------------------|-------------------------------------------------------------------------------------------------------------------------------------------------------------------------------------------------------------------------|----|-----|-------|--|
| 12 | $1.6 \times 10^{-9}$ | gi 41349753 dbj BAD08306.1  core binding factor alpha1 subunit type II [Rattus norvegicus]                                                                                                                              | 17 | 6.3 | 18.24 |  |
| 13 | $2.9 \times 10^{-9}$ | gi 27687955 ref XP_225498.1  PREDICTED: similar to isopentenyl-diphosphate delta isomerase 2 [Rattus norvegicus]                                                                                                        | 11 | 5.4 | 26.65 |  |
| 14 | $7.7 \times 10^{-9}$ | gi 3687907 gb AAC78485.1  dlg 3 [Rattus norvegicus]                                                                                                                                                                     | 9  | 5.4 | 26.47 |  |
| 15 | $7.9 \times 10^{-9}$ | gi 16758202 ref NP_445911.1  RAB27B, member RAS oncogene family [Rattus norvegicus]                                                                                                                                     | 10 | 5.4 | 24.83 |  |
| 16 | $8.1 \times 10^{-9}$ | gi 19424194 ref NP_598220.1  RAB3C, member RAS oncogene family [Rattus norvegicus]                                                                                                                                      | 10 | 5.2 | 26.11 |  |
| 17 | $1.0 \times 10^{-8}$ | gi 8394142 ref NP_059013.1  low Mr GTP-binding protein [Rattus norvegicus]                                                                                                                                              | 9  | 5.1 | 25.34 |  |
| 18 | $2.5 \times 10^{-8}$ | gi 3687905 gb AAC78484.1  dlg 2 [Rattus norvegicus]                                                                                                                                                                     | 9  | 5.3 | 25.45 |  |
| 19 | $5.5 \times 10^{-8}$ | gi 27718481 ref XP_235187.1  PREDICTED: similar to Serine/threonine/tyrosine-interacting protein (Protein tyrosine phosphatase-like protein) (Phosphoserine/threonine/tyrosine interaction protein) [Rattus norvegicus] | 14 | 6.0 | 25.58 |  |
| 20 | $4.5 \times 10^{-7}$ | gi 50925721 gb AAH79134.1  Ube2e2 protein [Rattus norvegicus]                                                                                                                                                           | 7  | 9.4 | 26.72 |  |
| 21 | $7.3 \times 10^{-7}$ | gi 56605730 ref NP_001008327.1  REX2, RNA exonuclease 2 homolog [Rattus norvegicus]                                                                                                                                     | 9  | 6.7 | 26.96 |  |
| 22 | $2.4 \times 10^{-6}$ | gi 56541165 gb AAH87584.1  Rab8a protein [Rattus norvegicus]                                                                                                                                                            | 14 | 9.5 | 17.58 |  |
| 23 | $9.4 \times 10^{-6}$ | gi 49522647 gb AAH71176.1  Rab8a protein [Rattus norvegicus]                                                                                                                                                            | 11 | 9.3 | 23.69 |  |
| 24 | $3.3 \times 10^{-4}$ | gi 46237565 emb CAE83945.1  RT1 class II, B beta [Rattus norvegicus]                                                                                                                                                    | 14 | 8.0 | 27.07 |  |

## NOTE:

1. To search again using **unmatched masses**, click the symbol .
2. Highly similar protein sequences were given the same rank (click "+" to expand/contract).

**Input Summary**

Search id ADFAB1EA-0BF8-5E6124AA

Sequences 20073

**Date & Time** Fri Mar 30 17:00:13 2007 UTC (Search Time: 0.38 sec.)

**Sample ID** 20040813 NIA MRich spot 4216 search 20070330 number 1

**Database** NCBIInr [..\databases\Inr]

**Taxonomy** Rattus

**Mass Range** 15 - 28 kDa

**pI Range** 5.0 -9.6

**Digestion** Trypsin

**Missed Cuts** 0

**Modifications** +C2H3ON@C(Complete); +O@M(Partial);

**Charge State** MH+

**Masses (avg)**

**Tolerance (avg)** 1.00 ppm

**Masses (mon)** 706.348 711.629 712.257 717.362 718.407 723.389 725.416  
730.423 733.370 738.404 739.391 742.411 744.446 749.444  
754.422 763.351 765.396 769.438 773.453 779.468 781.440  
787.467 788.487 792.419 799.362 801.474 813.474 819.469  
825.487 831.449 833.466 836.848 841.485 848.679 850.483  
854.508 856.495 863.476 877.545 880.536 884.512 891.467  
892.551 903.455 904.406 906.470 916.501 918.396 922.497  
933.500 939.490 942.503 948.542 950.574 953.521 956.493  
962.515 963.475 969.581 970.587 980.546 988.503 989.519  
993.480 996.578 1003.555 1009.574 1010.557 1016.768  
1017.541 1023.580 1039.569 1043.520 1051.533 1056.535  
1060.562 1066.618 1068.552 1074.499 1078.648 1084.601  
1090.569 1094.572 1100.635 1102.555 1105.596 1107.565  
1113.799 1114.585 1124.648 1132.560 1138.590 1140.544  
1146.665 1148.557 1155.591 1163.564 1173.708 1186.862  
1187.581 1194.594 1209.081 1209.642 1210.602 1212.616  
1215.594 1222.643 1223.631 1228.674 1231.624 1238.956  
1239.619 1242.606 1246.666 1253.709 1254.615 1259.649  
1263.665 1270.636 1274.621 1285.118 1285.625 1287.604  
1294.666 1301.625 1302.693 1305.512 1312.988 1313.720  
1315.648 1327.710 1328.667 1332.595 1339.704 1347.722  
1349.749 1353.708 1361.693 1364.651 1371.796 1373.641  
1379.634 1386.819 1387.721 1390.656 1398.800 1400.689  
1403.612 1410.834 1411.693 1418.859 1419.620 1420.660

|          |          |          |          |          |          |
|----------|----------|----------|----------|----------|----------|
| 1424.646 | 1435.795 | 1442.715 | 1444.735 | 1447.653 | 1454.731 |
| 1463.679 | 1469.762 | 1479.740 | 1486.688 | 1500.788 | 1514.956 |
| 1517.734 | 1520.778 | 1527.716 | 1534.696 | 1535.698 | 1539.737 |
| 1543.755 | 1550.878 | 1552.787 | 1555.733 | 1562.751 | 1565.732 |
| 1568.744 | 1571.785 | 1579.160 | 1579.828 | 1586.739 | 1587.812 |
| 1595.010 | 1595.816 | 1598.883 | 1605.836 | 1614.751 | 1615.806 |
| 1619.651 | 1627.708 | 1628.821 | 1636.792 | 1642.844 | 1651.779 |
| 1654.790 | 1657.776 | 1665.790 | 1666.862 | 1674.815 | 1683.781 |
| 1693.049 | 1694.905 | 1715.673 | 1725.923 | 1728.805 | 1736.961 |
| 1743.758 | 1746.824 | 1756.940 | 1765.049 | 1773.800 | 1781.863 |
| 1783.739 | 1788.947 | 1791.881 | 1801.842 | 1809.824 | 1814.783 |
| 1819.921 | 1823.772 | 1831.976 | 1853.770 | 1858.005 | 1866.810 |
| 1870.856 | 1879.253 | 1881.034 | 1889.922 | 1899.330 | 1903.000 |
| 1911.204 | 1915.917 | 1931.688 | 1940.991 | 1945.058 | 1954.960 |
| 1959.935 | 1964.797 | 1969.695 | 1978.491 | 1986.166 | 1994.878 |
| 1999.995 | 2010.065 | 2017.620 | 2030.222 | 2040.004 | 2044.173 |
| 2054.141 | 2064.164 | 2073.107 | 2075.868 | 2085.390 | 2096.074 |
| 2100.948 | 2104.994 | 2113.035 | 2116.100 | 2120.936 | 2130.436 |
| 2132.022 | 2141.267 | 2143.854 | 2146.443 | 2150.688 | 2160.068 |
| 2166.018 | 2183.165 | 2188.958 | 2196.148 | 2206.101 | 2219.977 |
| 2229.920 | 2233.070 | 2242.085 | 2244.892 | 2258.154 | 2260.138 |
| 2269.208 | 2270.973 | 2275.983 | 2285.052 | 2294.075 | 2311.074 |
| 2320.083 | 2321.186 | 2330.183 | 2331.874 | 2346.043 | 2354.957 |
| 2361.073 | 2366.246 | 2376.019 | 2378.154 | 2395.230 | 2407.905 |
| 2418.228 | 2423.065 | 2432.258 | 2438.340 | 2448.494 | 2450.328 |
| 2461.276 | 2472.181 | 2485.897 | 2498.102 | 2504.401 | 2509.258 |
| 2514.996 | 2524.023 | 2527.443 | 2531.168 | 2542.941 | 2554.911 |
| 2568.889 | 2574.423 | 2579.278 | 2591.265 | 2595.244 | 2609.263 |
| 2614.943 | 2617.528 | 2627.393 | 2630.432 | 2635.375 | 2646.417 |
| 2658.976 | 2671.217 | 2683.695 | 2694.524 | 2697.007 | 2701.942 |
| 2705.094 | 2715.229 | 2726.227 | 2734.005 | 2746.383 | 2748.642 |
| 2760.876 | 2764.700 | 2775.975 | 2780.307 | 2790.689 | 2796.101 |
| 2800.235 | 2810.654 | 2820.627 | 2831.156 | 2838.437 | 2843.105 |
| 2854.971 | 2863.329 | 2875.816 | 2886.085 | 2890.466 | 2903.738 |
| 2913.803 | 2915.040 | 2919.661 | 2926.618 | 2937.161 | 2941.289 |
| 2951.858 | 2962.740 | 2972.870 | 2983.239 | 2995.174 | 3008.759 |
| 3018.969 | 3024.672 | 3036.393 | 3048.844 | 3053.571 | 3066.841 |
| 3079.317 | 3090.395 | 3092.680 | 3104.345 | 3116.935 | 3121.865 |
| 3133.547 | 3137.132 | 3143.929 | 3156.297 | 3163.191 | 3170.283 |



|          |          |          |          |          |          |
|----------|----------|----------|----------|----------|----------|
| 3181.220 | 3184.565 | 3189.625 | 3193.166 | 3201.625 | 3212.884 |
| 3216.017 | 3224.584 | 3241.751 | 3245.205 | 3257.349 | 3264.198 |
| 3272.907 | 3283.248 | 3294.457 | 3305.724 | 3312.431 | 3325.672 |
| 3337.148 | 3342.524 | 3353.522 | 3355.630 | 3368.097 | 3374.633 |
| 3386.116 | 3398.954 | 3402.767 | 3414.849 | 3418.080 | 3423.323 |
| 3436.391 | 3446.990 | 3454.593 | 3466.410 | 3478.646 | 3487.638 |
| 3499.113 | 3510.768 | 3519.402 | 3526.765 | 3538.065 | 3544.083 |
| 3555.371 | 3558.708 | 3563.375 | 3568.609 | 3578.847 | 3590.837 |
| 3595.970 | 3600.581 | 3613.094 | 3617.919 | 3620.596 | 3633.592 |
| 3643.313 | 3655.575 | 3665.694 | 3678.035 | 3682.453 | 3689.167 |
| 3701.384 |          |          |          |          |          |

**Tolerance** 8.00 ppm  
**(mon)**

**Number of** 448  
**Peptides**

# Laboratory of Mass Spectrometry and Gaseous Ion Chemistry

## PROWL

- ▶ **ProFound**
- ▶ **ProteinInfo**
- ▶ **PeptideMap**
- ▶ **PepFrag**
- ▶ **X! Tandem**
- ▶ **X! Hunter**
- ▶ **GPMDDB**
- ▶ **PROWL Home**
- ▶ **Chait Lab**



The Rockefeller University  
1230 York Avenue,  
New York, NY 10021  
(212) 327-8000



**National Center for  
Research Resources**

National Resource  
for the Mass Spectrometric  
Analysis of Biological  
Macromolecules

## ProFound

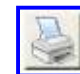

### Protein Candidates

| Rank | Expectation           | Protein Information and Sequence Analyse Tools (T)                                                              | %  | pI  | kDa   | R |
|------|-----------------------|-----------------------------------------------------------------------------------------------------------------|----|-----|-------|---|
| 1    | 1.4×10 <sup>-14</sup> | gi 50925930 gb AAH79461.1  Similar to RIKEN cDNA C430008C19 [Rattus norvegicus]                                 | 44 | 6.5 | 23.90 | ⊙ |
| +2   | 1.3×10 <sup>-6</sup>  | gi 56388776 gb AAH87696.1  Fgfr1op2 protein [Rattus norvegicus]                                                 | 19 | 5.4 | 25.05 | ⊙ |
|      | -                     | gi 38426813 gb AAR20448.1  wound inducible transcript 3.0 alpha [Rattus norvegicus]                             | 16 | 5.4 | 25.05 | ⊙ |
| 3    | 2.7×10 <sup>-6</sup>  | gi 46485429 ref NP_997477.1  glyoxylase 1 [Rattus norvegicus]                                                   | 23 | 5.1 | 20.97 | ⊙ |
| 4    | 9.5×10 <sup>-6</sup>  | gi 4138018 emb CAA76114.1  metalloproteinase [Rattus norvegicus]                                                | 16 | 6.1 | 23.12 | ⊙ |
| 5    | 1.5×10 <sup>-4</sup>  | gi 41386755 ref NP_958824.1  FGFR1 oncogene partner 2 [Rattus norvegicus]                                       | 18 | 5.6 | 29.53 | ⊙ |
| 6    | 4.0×10 <sup>-4</sup>  | gi 38489091 gb AAR21241.1  eomesodermin [Rattus norvegicus]                                                     | 27 | 6.8 | 22.10 | ⊙ |
| 7    | 7.7×10 <sup>-4</sup>  | gi 13399989 pdb 1I1A C Chain C, Crystal Structure Of The Neonatal Fc Receptor Complexed With A Heterodimeric Fc | 16 | 6.8 | 25.60 | ⊙ |
| 8    | 8.0×10 <sup>-4</sup>  | gi 56388596 gb AAH87673.1  Lipoma HMGIC fusion partner-like 5 [Rattus norvegicus]                               | 21 | 6.7 | 24.68 | ⊙ |
| 9    | 3.3×10 <sup>-3</sup>  | gi 55552 emb CAA78041.1  45kDa protein [Rattus norvegicus]                                                      | 13 | 6.7 | 21.26 | ⊙ |
| 10   | 4.9×10 <sup>-3</sup>  | gi 762882 gb AAA64892.1  glycoprotein P                                                                         | 16 | 6.5 | 27.74 | ⊙ |
| 11   | 5.2×10 <sup>-3</sup>  | gi 1658331 gb AAB18293.1  5-HT3 receptor subunit A short form                                                   | 16 | 6.8 | 25.81 | ⊙ |
| 12   | 6.0×10 <sup>-3</sup>  | gi 50811823 ref NP_001002851.1  SCIRP10-related protein [Rattus norvegicus]                                     | 20 | 5.3 | 18.97 | ⊙ |
| +13  | 9.7×10 <sup>-3</sup>  | gi 33356831 pdb 1C7Z A Chain A, Regulatory Complex Of Fructose-2,6-Bisphosphatase                               | 14 | 5.8 | 22.48 | ⊙ |

|     |       |                                                                                                                                                                         |    |     |       |  |
|-----|-------|-------------------------------------------------------------------------------------------------------------------------------------------------------------------------|----|-----|-------|--|
|     |       | <a href="#">gi 2914269 pdb 1TIP A</a> Chain A, The Bisphosphatase Domain Of The Bifunctional Rat Liver 6-Phosphofructo-2-KinaseFRUCTOSE-2,6-Bisphosphatase              | 14 | 5.7 | 22.34 |  |
|     |       | <a href="#">gi 2392330 pdb 1FBT A</a> Chain A, The Bisphosphatase Domain Of The Bifunctional Rat Liver 6-Phosphofructo-2-KinaseFRUCTOSE-2,6-Bisphosphatase              | 14 | 5.8 | 21.82 |  |
| 14  | 0.012 | <a href="#">gi 3687905 gb AAC78484.1</a>   dlg 2 [Rattus norvegicus]                                                                                                    | 14 | 5.3 | 25.45 |  |
| +15 | 0.034 | <a href="#">gi 2145145 gb AAB58429.1</a>   apolipoprotein A-I [Rattus norvegicus]                                                                                       | 20 | 5.5 | 29.96 |  |
|     |       | <a href="#">gi 2145143 gb AAB58428.1</a>   apolipoprotein A-I [Rattus norvegicus]                                                                                       | 20 | 5.5 | 29.87 |  |
| 16  | 0.041 | <a href="#">gi 8393355 ref NP_058822.1</a>   ferredoxin 1 [Rattus norvegicus]                                                                                           | 20 | 5.6 | 20.57 |  |
| 17  | 0.079 | <a href="#">gi 56605778 ref NP_001008352.1</a>   hypothetical protein LOC309681 [Rattus norvegicus]                                                                     | 10 | 6.6 | 28.39 |  |
| 18  | 0.16  | <a href="#">gi 8394513 ref NP_058884.1</a>   UNC-119 homolog [Rattus norvegicus]                                                                                        | 14 | 5.8 | 27.20 |  |
| 19  | 0.19  | <a href="#">gi 34871653 ref XP_343924.1</a>   PREDICTED: similar to retinoic acid, EGF, and NGF upregulated [Rattus norvegicus]                                         | 19 | 6.0 | 26.38 |  |
| 20  | 0.19  | <a href="#">gi 50925831 gb AAH79271.1</a>   Similar to Glutathione S-transferase A1 (GTH1) (HA subunit 1) (GST-epsilon) (GSTA1-1) (GST class-alpha) [Rattus norvegicus] | 14 | 5.9 | 25.79 |  |

## NOTE:

1. To search again using **unmatched masses**, click the symbol .
2. Highly similar protein sequences were given the same rank (click "+" to expand/contract).

**Input Summary****Search id** B002E773-09EC-606D26B6**Sequences** 20073**Date & Time** Mon Apr 02 14:09:36 2007 UTC (Search Time: 0.42 sec.)**Sample ID** 20040813 NIA MRich spot 6308 search 20070402 number 1**Database** NCBIInr [..\databases\nr]**Taxonomy** Rattus**Mass Range** 15 - 30 kDa

**pI Range** 5.0 -7.0

**Digestion** Trypsin

**Missed Cuts** 0

**Modifications** +C2H3ON@C(Complete);

**Charge State** MH+

**Masses (avg)**

**Tolerance (avg)** 1.00 ppm

**Masses (mon)** 709.380 711.387 715.410 720.418 725.425 727.437 732.651  
733.415 737.426 742.438 747.429 749.416 752.401 755.465  
763.600 764.381 766.502 770.453 776.400 778.481 784.496  
785.400 788.456 794.434 796.520 798.514 805.465 810.473  
812.484 818.456 819.457 821.441 824.508 826.518 832.522  
838.431 840.496 848.450 854.533 856.500 858.509 864.727  
865.479 866.508 878.467 880.501 884.517 891.552 893.521  
902.489 906.535 913.514 914.531 920.664 921.541 932.477  
938.525 940.545 942.506 948.587 949.540 951.531 955.519  
961.537 967.616 969.563 979.600 986.476 992.485 993.545  
996.579 999.554 1001.555 1007.759 1008.528 1014.518  
1020.570 1023.537 1037.553 1041.544 1044.542 1051.686  
1058.613 1060.540 1066.573 1070.554 1079.952 1080.571  
1081.544 1083.580 1089.835 1090.612 1096.575 1101.616  
1106.534 1111.575 1117.595 1124.578 1127.558 1133.599  
1136.659 1139.542 1142.610 1148.576 1155.588 1156.594  
1162.712 1163.607 1172.621 1187.599 1188.527 1200.667  
1208.561 1209.567 1216.645 1223.579 1227.654 1232.634  
1240.609 1242.672 1245.757 1252.726 1254.727 1261.650  
1263.778 1270.725 1278.678 1282.675 1290.593 1298.753  
1299.772 1307.742 1309.690 1316.909 1318.594 1327.652  
1334.871 1335.707 1337.700 1347.786 1349.640 1352.683  
1359.722 1372.707 1376.700 1390.645 1395.669 1402.643  
1405.517 1412.819 1416.693 1424.608 1425.649 1431.704  
1434.737 1441.807 1444.671 1449.792 1453.639 1456.771  
1463.665 1464.695 1469.748 1479.726 1487.659 1500.929  
1502.755 1506.724 1513.761 1517.718 1523.703 1531.649  
1537.714 1545.749 1552.770 1559.754 1564.783 1567.713  
1575.773 1582.782 1589.860 1591.847 1595.770 1597.815  
1604.900 1606.761 1610.784 1618.737 1621.664 1630.758

|          |          |          |          |          |          |
|----------|----------|----------|----------|----------|----------|
| 1632.553 | 1639.796 | 1648.039 | 1648.887 | 1657.015 | 1657.755 |
| 1660.909 | 1669.700 | 1671.902 | 1680.998 | 1683.870 | 1686.855 |
| 1694.799 | 1696.990 | 1708.240 | 1708.769 | 1725.899 | 1727.718 |
| 1732.703 | 1736.881 | 1740.839 | 1748.826 | 1751.812 | 1760.049 |
| 1761.631 | 1764.883 | 1768.760 | 1777.123 | 1778.854 | 1782.860 |
| 1791.941 | 1794.877 | 1802.930 | 1812.004 | 1819.865 | 1824.866 |
| 1832.871 | 1835.841 | 1844.246 | 1845.605 | 1854.843 | 1862.797 |
| 1864.977 | 1874.206 | 1877.939 | 1887.873 | 1896.718 | 1899.681 |
| 1904.996 | 1908.789 | 1920.132 | 1928.875 | 1936.868 | 1939.892 |
| 1944.907 | 1956.892 | 1959.872 | 1964.824 | 1973.848 | 1977.319 |
| 1985.022 | 1988.053 | 1991.567 | 2001.135 | 2002.942 | 2010.967 |
| 2014.713 | 2017.827 | 2025.911 | 2034.801 | 2043.711 | 2048.858 |
| 2057.157 | 2060.824 | 2068.872 | 2073.990 | 2077.978 | 2083.015 |
| 2092.369 | 2095.604 | 2106.068 | 2114.729 | 2123.813 | 2127.197 |
| 2131.267 | 2141.757 | 2145.872 | 2156.992 | 2166.291 | 2167.952 |
| 2171.968 | 2183.186 | 2188.885 | 2197.842 | 2200.021 | 2205.710 |
| 2219.934 | 2221.616 | 2227.047 | 2236.209 | 2239.108 | 2248.008 |
| 2257.213 | 2263.873 | 2272.019 | 2277.062 | 2287.260 | 2290.192 |
| 2310.574 | 2313.974 | 2326.821 | 2330.493 | 2339.866 | 2350.270 |
| 2361.351 | 2366.066 | 2368.557 | 2378.400 | 2383.394 | 2393.664 |
| 2395.905 | 2400.589 | 2409.341 | 2415.097 | 2419.037 | 2428.952 |
| 2433.933 | 2445.010 | 2454.912 | 2471.927 | 2476.080 | 2479.064 |
| 2488.026 | 2495.826 | 2504.481 | 2513.219 | 2516.934 | 2522.479 |
| 2531.349 | 2537.860 | 2542.205 | 2546.214 | 2557.919 | 2562.213 |
| 2571.290 | 2580.281 | 2586.237 | 2599.647 | 2608.653 | 2614.918 |
| 2624.916 | 2634.796 | 2639.984 | 2651.105 | 2659.262 | 2667.883 |
| 2679.726 | 2684.540 | 2695.300 | 2698.098 | 2708.430 | 2713.726 |
| 2720.538 | 2728.484 | 2738.980 | 2749.636 | 2753.559 | 2764.776 |
| 2777.613 | 2786.282 | 2796.247 | 2799.418 | 2812.943 | 2826.250 |
| 2836.789 | 2841.168 | 2848.282 | 2854.146 | 2863.475 | 2875.998 |
| 2882.034 | 2894.126 | 2900.654 | 2910.277 | 2924.104 | 2936.394 |
| 2943.408 | 2957.021 | 2961.932 | 2968.535 | 2980.662 | 2986.145 |
| 2996.500 | 3009.348 | 3016.522 | 3028.116 | 3038.172 | 3044.563 |
| 3047.873 | 3051.185 | 3061.540 | 3074.378 | 3088.591 | 3103.288 |
| 3108.320 | 3120.804 | 3135.050 | 3144.867 | 3157.236 | 3170.616 |
| 3181.934 | 3192.776 | 3201.731 | 3216.008 | 3223.120 | 3234.110 |
| 3237.560 | 3250.726 | 3254.838 | 3266.575 | 3277.909 | 3284.240 |
| 3295.141 | 3299.863 | 3305.828 | 3319.871 | 3331.103 | 3335.072 |
| 3342.238 | 3356.241 | 3360.381 | 3372.896 | 3375.793 | 3390.966 |



|          |          |          |          |          |          |
|----------|----------|----------|----------|----------|----------|
| 3399.685 | 3411.447 | 3423.110 | 3427.292 | 3438.311 | 3444.045 |
| 3453.387 | 3460.165 | 3471.673 | 3482.804 | 3488.376 | 3496.423 |
| 3511.228 | 3521.742 | 3534.677 | 3540.250 | 3544.825 | 3555.873 |
| 3567.944 | 3570.885 | 3584.556 | 3596.393 | 3608.656 | 3620.737 |
| 3629.343 | 3641.458 | 3647.320 | 3661.180 | 3672.205 | 3686.644 |
| 3692.420 | 3697.339 |          |          |          |          |

**Tolerance** 28.00 ppm  
**(mon)**

**Number of** 456  
**Peptides**

# Laboratory of Mass Spectrometry and Gaseous Ion Chemistry

## PROWL

- ▶ **ProFound**
- ▶ **ProteinInfo**
- ▶ **PeptideMap**
- ▶ **PepFrag**
- ▶ **X! Tandem**
- ▶ **X! Hunter**
- ▶ **GPMDDB**
- ▶ **PROWL Home**
- ▶ **Chait Lab**

## ProFound



### Protein Candidates

| Rank | Expectation          | Protein Information and Sequence Analyse Tools (T)                                                                          | %  | pI  | kDa   | R |
|------|----------------------|-----------------------------------------------------------------------------------------------------------------------------|----|-----|-------|---|
| +1   | 1.2×10 <sup>-5</sup> | gi 205486 gb AAA41623.1  myosin light chain MLC3-f                                                                          | 55 | 4.6 | 16.72 | ⊙ |
|      |                      | gi 13487933 ref NP_064489.1  fast myosin alkali light chain 3f [Rattus norvegicus]                                          | 47 | 4.6 | 16.71 | ⊙ |
| 2    | 4.4×10 <sup>-4</sup> | gi 34810965 pdb 1NN7 A Chain A, Crystal Structure Of The Tetramerization Domain Of The Shal Voltage-Gated Potassium Channel | 46 | 4.9 | 12.92 | ⊙ |
|      |                      | gi 39654792 pdb 1R13 A Chain A, Carbohydrate Recognition And Neck Domains Of Surfactant Protein A (Sp-A)                    | 23 | 4.6 | 16.87 | ⊙ |
|      |                      | gi 13591758 gb AAK31339.1 AAK31339 KIAA1454-like protein [Rattus norvegicus]                                                | 30 | 4.3 | 17.25 | ⊙ |
|      |                      | gi 16758744 ref NP_446330.1  complexin 2 [Rattus norvegicus]                                                                | 39 | 5.1 | 15.49 | ⊙ |
|      |                      | gi 1703700 gb AAB37711.1  KRP4=kinesin-related protein [rats, testes, Peptide Partial, 153 aa]                              | 48 | 4.8 | 17.06 | ⊙ |
|      |                      | gi 4096760 gb AAD10399.1  phosphatidylinositol 4-kinase [Rattus norvegicus]                                                 | 39 | 4.7 | 16.28 | ⊙ |
|      |                      | gi 2160456 dbj BAA03557.1  calcium-binding protein P23K beta [Rattus norvegicus]                                            | 45 | 4.7 | 16.95 | ⊙ |
|      |                      | gi 2956998 emb CAA76404.1  fractalkine/neuroactin [Rattus norvegicus]                                                       | 34 | 4.6 | 13.77 | ⊙ |
|      |                      | gi 1363278 pir  C57233 complexin II - rat                                                                                   | 28 | 5.1 | 15.39 | ⊙ |
|      |                      | gi 49259317 pdb 1UD0 A Chain A, Crystal Structure Of The C-Terminal 10-Kda Subdomain Of Hsc70                               | 27 | 4.8 | 11.82 | ⊙ |
|      |                      | gi 7547027 gb AAF63763.1 AF250032_1 agrin precursor [Rattus norvegicus]                                                     | 19 | 5.0 | 16.01 | ⊙ |



The Rockefeller University  
1230 York Avenue,  
New York, NY 10021  
(212) 327-8000



**National Center for  
Research Resources**

National Resource  
for the Mass Spectrometric  
Analysis of Biological  
Macromolecules

|   |                                                                                                                                                                                                       |    |     |       |  |
|---|-------------------------------------------------------------------------------------------------------------------------------------------------------------------------------------------------------|----|-----|-------|--|
| - | <a href="#">gi 27679694 ref XP_215044.1 </a> PREDICTED: similar to Acyl carrier protein, mitochondrial precursor (ACP) (NADH-ubiquinone oxidoreductase 9.6 kDa subunit) (CI-SDAP) [Rattus norvegicus] | 17 | 4.9 | 17.78 |  |
| - | <a href="#">gi 11596861 ref NP_071620.1 </a> guanylate cyclase activator 2b [Rattus norvegicus]                                                                                                       | 52 | 4.7 | 11.90 |  |
| - | <a href="#">gi 52695347 pdb 1Q8D A</a> Chain A, The Crystal Structure Of Gdnf Family Co-Receptor Alpha 1 Domain 3                                                                                     | 40 | 4.7 | 12.44 |  |
| - | <a href="#">gi 47058998 ref NP_997679.1 </a> TOM22 protein [Rattus norvegicus]                                                                                                                        | 19 | 4.3 | 15.47 |  |

## NOTE:

1. To search again using **unmatched masses**, click the symbol .
2. Highly similar protein sequences were given the same rank (click "+" to expand/contract).

**Input Summary****Search id** AE372424-0C10-5E49246E**Sequences** 20092**Date & Time** Thu Jan 25 15:42:03 2007 UTC (Search Time: 0.38 sec.)**Sample ID****Database** NCBI nr [..\databases\nr]**Taxonomy** Rattus**Mass Range** 10 - 18 kDa**pI Range** 4.0 -5.1**Digestion** Trypsin**Missed Cuts** 1**Modifications** +C2H3ON@C(Complete); +O@M(Partial); +HPO3@TY(Partial);**Charge State** MH+**Masses (avg)****Tolerance (avg)** 1.00 ppm

|                     |          |          |          |          |          |          |          |
|---------------------|----------|----------|----------|----------|----------|----------|----------|
| <b>Masses (mon)</b> | 706.413  | 711.407  | 712.268  | 717.391  | 719.427  | 724.504  | 729.453  |
|                     | 734.473  | 739.492  | 740.498  | 745.447  | 751.425  | 754.469  | 763.453  |
|                     | 768.497  | 769.429  | 773.482  | 779.478  | 780.454  | 786.440  | 788.440  |
|                     | 794.588  | 795.404  | 797.377  | 803.446  | 813.427  | 814.502  | 816.518  |
|                     | 818.460  | 823.431  | 825.478  | 831.440  | 833.477  | 840.462  | 848.436  |
|                     | 854.441  | 856.448  | 862.501  | 863.469  | 877.438  | 883.526  | 885.466  |
|                     | 888.490  | 894.435  | 902.499  | 905.472  | 911.473  | 913.464  | 919.430  |
|                     | 920.532  | 933.475  | 934.462  | 940.620  | 941.466  | 943.428  | 945.474  |
|                     | 952.541  | 955.512  | 961.614  | 964.474  | 970.940  | 971.569  | 979.532  |
|                     | 982.440  | 988.755  | 989.537  | 993.520  | 999.487  | 1000.466 | 1003.554 |
|                     | 1016.553 | 1022.546 | 1023.601 | 1033.677 | 1034.520 | 1037.531 |          |
|                     | 1043.694 | 1044.498 | 1051.686 | 1060.541 | 1066.531 | 1067.674 |          |
|                     | 1074.499 | 1078.628 | 1084.513 | 1089.504 | 1091.549 | 1098.584 |          |
|                     | 1102.557 | 1105.620 | 1107.545 | 1113.667 | 1114.453 | 1124.493 |          |
|                     | 1132.585 | 1134.579 | 1138.594 | 1141.479 | 1147.580 | 1148.560 |          |
|                     | 1151.572 | 1163.545 | 1173.735 | 1176.619 | 1187.608 | 1190.578 |          |
|                     | 1200.606 | 1208.594 | 1210.513 | 1217.641 | 1218.557 | 1221.589 |          |
|                     | 1229.599 | 1232.598 | 1235.671 | 1243.466 | 1244.629 | 1251.690 |          |
|                     | 1254.715 | 1261.661 | 1263.646 | 1270.689 | 1284.858 | 1287.658 |          |
|                     | 1291.646 | 1298.694 | 1302.723 | 1307.634 | 1314.945 | 1315.677 |          |
|                     | 1328.721 | 1329.604 | 1336.657 | 1337.666 | 1348.518 | 1351.659 |          |
|                     | 1364.854 | 1372.673 | 1373.621 | 1380.689 | 1390.661 | 1398.578 |          |
|                     | 1399.661 | 1403.592 | 1410.838 | 1412.634 | 1419.700 | 1420.664 |          |
|                     | 1432.715 | 1434.728 | 1442.719 | 1446.685 | 1453.759 | 1454.735 |          |
|                     | 1456.712 | 1463.657 | 1470.799 | 1483.034 | 1483.682 | 1486.666 |          |
|                     | 1500.792 | 1502.670 | 1515.666 | 1519.678 | 1526.667 | 1529.719 |          |
|                     | 1532.696 | 1535.675 | 1543.678 | 1554.966 | 1557.648 | 1561.662 |          |
|                     | 1568.719 | 1569.760 | 1576.755 | 1582.776 | 1585.750 | 1592.781 |          |
|                     | 1595.765 | 1598.778 | 1606.755 | 1614.780 | 1619.598 | 1627.818 |          |
|                     | 1635.840 | 1646.777 | 1649.756 | 1656.819 | 1660.822 | 1668.953 |          |
|                     | 1669.723 | 1672.806 | 1676.663 | 1683.810 | 1688.870 | 1697.652 |          |
|                     | 1715.842 | 1724.918 | 1725.813 | 1731.831 | 1739.770 | 1744.716 |          |
|                     | 1754.826 | 1757.845 | 1762.761 | 1773.802 | 1782.917 | 1785.846 |          |
|                     | 1790.858 | 1799.816 | 1802.845 | 1810.973 | 1813.839 | 1819.838 |          |
|                     | 1827.717 | 1831.778 | 1847.025 | 1847.894 | 1849.891 | 1858.706 |          |
|                     | 1866.814 | 1868.822 | 1876.806 | 1878.849 | 1888.902 | 1891.918 |          |
|                     | 1900.069 | 1906.855 | 1914.950 | 1924.982 | 1930.984 | 1938.893 |          |
|                     | 1941.889 | 1953.836 | 1956.874 | 1961.941 | 1965.850 | 1976.913 |          |
|                     | 1983.176 | 1985.936 | 2002.024 | 2011.828 | 2017.904 | 2022.869 |          |

|          |          |          |          |          |          |
|----------|----------|----------|----------|----------|----------|
| 2025.929 | 2035.883 | 2039.896 | 2047.051 | 2055.988 | 2066.108 |
| 2079.077 | 2082.948 | 2091.809 | 2094.983 | 2104.952 | 2111.043 |
| 2121.888 | 2127.010 | 2144.907 | 2147.996 | 2151.182 | 2161.283 |
| 2165.857 | 2170.153 | 2181.903 | 2190.091 | 2194.001 | 2203.507 |
| 2208.031 | 2220.582 | 2221.820 | 2230.941 | 2235.047 | 2238.168 |
| 2247.323 | 2257.776 | 2258.993 | 2265.176 | 2268.029 | 2277.117 |
| 2278.949 | 2282.069 | 2291.184 | 2296.055 | 2308.045 | 2310.862 |
| 2314.975 | 2324.124 | 2327.080 | 2342.899 | 2352.070 | 2360.931 |
| 2363.190 | 2367.154 | 2376.240 | 2380.117 | 2383.865 | 2396.115 |
| 2398.952 | 2408.199 | 2412.134 | 2419.087 | 2421.241 | 2432.989 |
| 2437.178 | 2445.232 | 2447.098 | 2453.234 | 2466.263 | 2469.744 |
| 2479.932 | 2485.101 | 2491.149 | 2495.993 | 2509.271 | 2518.695 |
| 2526.308 | 2551.052 | 2559.089 | 2568.128 | 2572.158 | 2582.419 |
| 2592.459 | 2596.062 | 2607.333 | 2618.215 | 2630.053 | 2650.234 |
| 2675.927 | 2679.344 | 2689.152 | 2692.193 | 2701.184 | 2705.072 |
| 2716.999 | 2729.058 | 2732.121 | 2742.202 | 2747.462 | 2758.633 |
| 2765.431 | 2777.881 | 2782.038 | 2791.926 | 2794.169 | 2804.685 |
| 2808.254 | 2821.981 | 2826.171 | 2831.152 | 2840.983 | 2843.210 |
| 2854.466 | 2858.175 | 2870.399 | 2882.505 | 2887.354 | 2900.003 |
| 2904.359 | 2915.444 | 2932.349 | 2946.376 | 2952.414 | 2964.765 |
| 2968.802 | 2978.759 | 2982.180 | 2988.254 | 3003.338 | 3014.056 |
| 3018.385 | 3033.247 | 3043.498 | 3052.463 | 3066.364 | 3070.059 |
| 3081.606 | 3092.387 | 3098.611 | 3111.526 | 3116.376 | 3126.164 |
| 3139.023 | 3150.434 | 3155.693 | 3160.275 | 3171.345 | 3177.419 |
| 3188.481 | 3199.828 | 3204.785 | 3208.295 | 3222.355 | 3238.362 |
| 3246.227 | 3249.990 | 3253.141 | 3264.372 | 3278.477 | 3285.695 |
| 3291.761 | 3303.989 | 3312.282 | 3323.459 | 3326.645 | 3337.807 |
| 3349.222 | 3353.708 | 3367.495 | 3380.684 | 3386.719 | 3390.446 |
| 3404.269 | 3413.592 | 3425.845 | 3429.592 | 3438.159 | 3452.237 |
| 3455.167 | 3466.701 | 3481.076 | 3487.796 | 3492.971 | 3504.328 |
| 3529.379 | 3541.677 | 3566.296 | 3585.391 | 3589.547 | 3593.786 |
| 3606.721 | 3609.716 | 3622.841 | 3637.615 | 3648.024 | 3660.974 |
| 3670.232 | 3682.035 | 3694.430 | 3698.936 | 3701.927 |          |

**Tolerance** 19.00 ppm  
**(mon)**

**Number of** 441  
**Peptides**

# Laboratory of Mass Spectrometry and Gaseous Ion Chemistry

## PROWL

- ▶ **ProFound**
- ▶ **ProteinInfo**
- ▶ **PeptideMap**
- ▶ **PepFrag**
- ▶ **X! Tandem**
- ▶ **X! Hunter**
- ▶ **GPMDDB**
- ▶ **PROWL Home**
- ▶ **Chait Lab**

## ProFound



### Protein Candidates

| Rank | Expectation          | Protein Information and Sequence Analyse Tools (T)                                                                                             | %  | pI  | kDa   | R |
|------|----------------------|------------------------------------------------------------------------------------------------------------------------------------------------|----|-----|-------|---|
| +1   | 1.6×10 <sup>-8</sup> | gi 1363305 pir  S57854 myosin regulatory light chain 2 (clone YU63), brain - rat (fragment)                                                    | 47 | 4.2 | 12.57 | ⊙ |
|      | -                    | gi 1334227 emb CAA38437.1  unnamed protein product [Rattus norvegicus]                                                                         | 55 | 4.6 | 6.68  | ⊙ |
| 2    | 3.4×10 <sup>-6</sup> | gi 4322329 gb AAD16017.1  amiloride-sensitive epithelial sodium channel alpha subunit [Rattus norvegicus]                                      | 58 | 4.6 | 8.56  | ⊙ |
| 3    | 5.2×10 <sup>-6</sup> | gi 1881810 gb AAB49505.1  RET1 alpha subunit [Rattus sp.]                                                                                      | 32 | 4.6 | 6.91  | ⊙ |
|      | -                    | gi 1675351 gb AAB19106.1  inositol monophosphate [Rattus norvegicus]                                                                           | 58 | 4.9 | 9.66  | ⊙ |
|      | -                    | gi 111289 pir  S21218 peptidylprolyl isomerase (EC 5.2.1.8), 22K - rat (fragments)                                                             | 30 | 4.4 | 8.87  | ⊙ |
|      | -                    | gi 56541036 gb AAH87583.1  Myeloid/lymphoid or mixed-lineage leukemia (trithorax homolog, Drosophila); translocated to, 11 [Rattus norvegicus] | 46 | 4.6 | 10.01 | ⊙ |
|      | -                    | gi 561839 gb AAB02848.1  guanine nucleotide regulatory protein G alpha q                                                                       | 47 | 4.7 | 11.21 | ⊙ |
|      | -                    | gi 1483586 emb CAA67567.1  RT6 [Rattus norvegicus]                                                                                             | 29 | 5.0 | 11.99 | ⊙ |
|      | -                    | gi 206996 gb AAA42152.1  senescence marker protein 2B                                                                                          | 58 | 4.9 | 7.99  | ⊙ |
|      | -                    | gi 30841840 gb AAP34393.1  follistatin 288 variant [Rattus norvegicus]                                                                         | 60 | 4.4 | 5.85  | ⊙ |
|      | -                    | gi 56388612 gb AAH87681.1  Similar to RIKEN cDNA 4933433P14 gene [Rattus norvegicus]                                                           | 16 | 4.2 | 15.71 | ⊙ |
|      | -                    | gi 56246 emb CAA29100.1  alpha 2u-globulin [Rattus norvegicus]                                                                                 | 30 | 4.9 | 7.99  | ⊙ |
|      | -                    | gi 587518 emb CAA57204.1  keratin 18 [Rattus norvegicus]                                                                                       | 12 | 4.6 | 16.94 | ⊙ |



The Rockefeller University  
1230 York Avenue,  
New York, NY 10021  
(212) 327-8000



**National Center for  
Research Resources**

National Resource  
for the Mass Spectrometric  
Analysis of Biological  
Macromolecules

|   |                                                                                                                                                        |    |     |       |  |
|---|--------------------------------------------------------------------------------------------------------------------------------------------------------|----|-----|-------|--|
| - | <a href="#">gi 56540888 gb AAH87139.1 </a> Atg12 protein [Rattus norvegicus]                                                                           | 16 | 4.9 | 15.25 |  |
| - | <a href="#">gi 92028 pir C31982</a> Ca <sup>2+</sup> -transporting ATPase (EC 3.6.3.8) RB5-10, brain - rat (fragment)                                  | 45 | 4.3 | 10.50 |  |
| - | <a href="#">gi 544788 gb AAB29567.1 </a> platelet-derived growth factor beta-receptor, PDGF beta receptor [rats, Rat-1 cells, Peptide Partial, 102 aa] | 34 | 4.9 | 11.43 |  |
| - | <a href="#">gi 21693154 dbj BAC02713.1 </a> growth and differentiation factor-5 [Rattus norvegicus]                                                    | 48 | 4.6 | 7.70  |  |

## NOTE:

1. To search again using **unmatched masses**, click the symbol .
2. Highly similar protein sequences were given the same rank (click "+" to expand/contract).

**Input Summary****Search id** AD4C3020-OCFC-5D5D2382**Sequences** 20092**Date & Time** Wed Jan 24 20:34:43 2007 UTC (Search Time: 0.30 sec.)**Sample ID****Database** NCBI nr [..\databases\nr]**Taxonomy** Rattus**Mass Range** 5 - 17 kDa**pI Range** 4.0 -5.0**Digestion** Trypsin**Missed Cuts** 1**Modifications** +C2H3ON@C(Complete); +O@M(Partial); +HPO3@STY(Partial);**Charge State** MH+**Masses (avg)****Tolerance (avg)** 1.00 ppm

|                     |          |          |          |          |          |          |         |
|---------------------|----------|----------|----------|----------|----------|----------|---------|
| <b>Masses (mon)</b> | 706.362  | 711.392  | 712.253  | 717.430  | 720.350  | 724.525  | 729.456 |
|                     | 732.419  | 735.406  | 740.484  | 742.241  | 748.428  | 750.434  | 753.476 |
|                     | 763.420  | 764.424  | 766.359  | 770.460  | 771.487  | 777.869  | 778.469 |
|                     | 781.455  | 785.502  | 792.396  | 793.456  | 797.477  | 799.472  | 806.446 |
|                     | 812.511  | 818.484  | 819.408  | 822.433  | 828.519  | 834.453  | 838.402 |
|                     | 841.481  | 848.460  | 850.459  | 856.767  | 857.535  | 861.419  | 864.481 |
|                     | 881.471  | 888.494  | 890.460  | 893.473  | 899.535  | 905.455  | 916.499 |
|                     | 921.515  | 932.821  | 933.478  | 934.465  | 940.520  | 943.575  | 949.453 |
|                     | 952.585  | 955.577  | 962.493  | 965.605  | 967.508  | 974.530  | 980.671 |
|                     | 986.515  | 991.487  | 992.525  | 999.552  | 1000.573 | 1004.535 |         |
|                     | 1011.627 | 1014.496 | 1018.528 | 1024.570 | 1034.586 | 1037.574 |         |
|                     | 1044.542 | 1051.708 | 1057.913 | 1058.504 | 1060.562 | 1064.576 |         |
|                     | 1067.673 | 1079.666 | 1085.620 | 1087.572 | 1093.593 | 1094.661 |         |
|                     | 1100.591 | 1102.601 | 1106.581 | 1112.610 | 1124.649 | 1130.614 |         |
|                     | 1132.470 | 1138.637 | 1140.567 | 1144.570 | 1146.597 | 1148.626 |         |
|                     | 1154.608 | 1158.590 | 1160.629 | 1166.620 | 1170.622 | 1173.594 |         |
|                     | 1176.592 | 1183.666 | 1186.608 | 1192.595 | 1200.649 | 1208.567 |         |
|                     | 1215.782 | 1216.674 | 1220.644 | 1228.674 | 1229.689 | 1234.696 |         |
|                     | 1240.567 | 1248.687 | 1254.758 | 1263.067 | 1263.665 | 1272.724 |         |
|                     | 1275.630 | 1285.600 | 1288.642 | 1297.669 | 1299.706 | 1306.703 |         |
|                     | 1311.695 | 1318.822 | 1329.647 | 1339.629 | 1348.659 | 1351.701 |         |
|                     | 1354.672 | 1365.817 | 1366.663 | 1368.654 | 1375.734 | 1382.859 |         |
|                     | 1385.763 | 1388.696 | 1396.759 | 1401.744 | 1405.753 | 1413.739 |         |
|                     | 1414.726 | 1422.763 | 1429.702 | 1430.746 | 1434.771 | 1441.867 |         |
|                     | 1442.736 | 1451.596 | 1458.759 | 1461.743 | 1468.648 | 1478.803 |         |
|                     | 1484.685 | 1489.798 | 1500.678 | 1514.897 | 1515.735 | 1522.740 |         |
|                     | 1523.896 | 1527.762 | 1530.710 | 1535.744 | 1542.690 | 1549.757 |         |
|                     | 1556.655 | 1562.663 | 1569.723 | 1572.764 | 1579.927 | 1581.854 |         |
|                     | 1586.677 | 1593.791 | 1595.861 | 1598.659 | 1605.692 | 1613.687 |         |
|                     | 1616.662 | 1624.820 | 1626.639 | 1630.687 | 1642.670 | 1644.690 |         |
|                     | 1652.617 | 1656.670 | 1658.698 | 1666.933 | 1669.821 | 1672.683 |         |
|                     | 1680.760 | 1682.886 | 1687.695 | 1696.695 | 1697.777 | 1715.800 |         |
|                     | 1725.938 | 1727.505 | 1735.882 | 1740.008 | 1743.801 | 1752.048 |         |
|                     | 1752.866 | 1756.843 | 1779.718 | 1788.221 | 1790.785 | 1794.861 |         |
|                     | 1803.000 | 1810.956 | 1817.811 | 1825.915 | 1833.951 | 1834.989 |         |
|                     | 1848.020 | 1856.046 | 1856.975 | 1863.916 | 1867.929 | 1876.728 |         |
|                     | 1879.938 | 1887.683 | 1892.044 | 1897.906 | 1906.305 | 1908.834 |         |
|                     | 1917.965 | 1927.945 | 1930.903 | 1940.857 | 1948.964 | 1959.055 |         |
|                     | 1962.991 | 1968.962 | 1977.038 | 1986.931 | 1988.942 | 1997.992 |         |



|          |          |          |          |          |          |
|----------|----------|----------|----------|----------|----------|
| 2004.921 | 2009.989 | 2019.934 | 2026.052 | 2035.064 | 2038.985 |
| 2047.996 | 2050.038 | 2059.959 | 2067.087 | 2075.024 | 2079.075 |
| 2082.055 | 2091.222 | 2093.964 | 2099.977 | 2109.060 | 2112.154 |
| 2117.015 | 2126.073 | 2127.967 | 2131.853 | 2141.035 | 2150.144 |
| 2153.017 | 2163.091 | 2166.068 | 2168.294 | 2183.026 | 2186.048 |
| 2195.220 | 2204.285 | 2207.512 | 2220.124 | 2223.203 | 2233.089 |
| 2243.062 | 2259.103 | 2268.267 | 2270.352 | 2275.104 | 2282.080 |
| 2291.872 | 2294.226 | 2308.345 | 2319.101 | 2321.145 | 2330.109 |
| 2348.090 | 2356.093 | 2365.550 | 2375.355 | 2380.347 | 2382.943 |
| 2393.213 | 2397.894 | 2407.237 | 2412.329 | 2420.341 | 2432.118 |
| 2436.206 | 2445.190 | 2454.125 | 2458.331 | 2465.315 | 2475.124 |
| 2484.213 | 2487.404 | 2497.256 | 2509.456 | 2518.473 | 2521.110 |
| 2527.134 | 2536.760 | 2546.302 | 2550.246 | 2560.222 | 2564.314 |
| 2580.097 | 2590.371 | 2596.581 | 2607.472 | 2624.975 | 2633.229 |
| 2644.372 | 2654.496 | 2658.975 | 2671.146 | 2682.368 | 2688.232 |
| 2698.476 | 2707.160 | 2716.983 | 2727.984 | 2734.427 | 2742.287 |
| 2749.418 | 2760.130 | 2763.777 | 2774.518 | 2778.564 | 2782.898 |
| 2789.725 | 2800.160 | 2805.795 | 2809.436 | 2819.442 | 2831.223 |
| 2842.417 | 2853.310 | 2860.872 | 2874.580 | 2892.305 | 2897.597 |
| 2907.396 | 2919.650 | 2923.692 | 2935.287 | 2945.735 | 2957.374 |
| 2960.892 | 2968.227 | 2970.871 | 2979.102 | 2985.061 | 2996.630 |
| 3004.675 | 3013.359 | 3019.982 | 3030.728 | 3042.682 | 3050.193 |
| 3058.124 | 3069.833 | 3077.788 | 3086.802 | 3098.304 | 3102.730 |
| 3107.498 | 3113.472 | 3125.211 | 3137.653 | 3141.805 | 3150.760 |
| 3164.996 | 3179.073 | 3184.659 | 3197.256 | 3202.248 | 3214.001 |
| 3219.618 | 3226.426 | 3237.380 | 3242.365 | 3258.959 | 3267.503 |
| 3280.339 | 3286.709 | 3293.355 | 3304.694 | 3317.953 | 3328.594 |
| 3341.628 | 3345.836 | 3357.264 | 3359.997 | 3368.946 | 3371.958 |
| 3385.703 | 3416.350 | 3423.284 | 3436.542 | 3441.598 | 3449.508 |
| 3462.499 | 3469.242 | 3480.203 | 3483.582 | 3486.644 | 3495.242 |
| 3506.524 | 3515.146 | 3525.820 | 3536.830 | 3545.770 | 3559.102 |
| 3562.399 | 3575.399 | 3587.374 | 3590.764 | 3605.151 | 3620.661 |
| 3634.417 | 3646.774 | 3651.658 | 3666.982 | 3681.316 | 3687.573 |
| 3700.308 |          |          |          |          |          |

**Tolerance** 11.00 ppm  
**(mon)**

**Number of** 442  
**Peptides**



PROWL

- [ProFound](#)
- [ProteinInfo](#)
- [PeptideMap](#)
- [PepFrag](#)
- [X! Tandem](#)
- [X! Hunter](#)
- [GPMDB](#)
- [PROWL Home](#)
- [Chait Lab](#)

The Rockefeller  
University

The Rockefeller University  
1230 York Avenue,  
New York, NY 10021  
(212) 327-8000

National Center of  
Research Resources

National Resource  
for the Mass Spectrometric  
Analysis of Biological  
Macromolecules

## ProFound

## Protein Candidates

| Rank | Expectation           | Protein Information and Sequence Analyse Tools (T)                                                                                | %                  | pI  | kDa   | R                        |
|------|-----------------------|-----------------------------------------------------------------------------------------------------------------------------------|--------------------|-----|-------|--------------------------|
| 1    | 2.4×10 <sup>-11</sup> | <a href="#">gi 57164117 ref NP_001009385.1 </a> apolipoprotein N [Rattus norvegicus]                                              | <a href="#">19</a> | 5.3 | 28.50 | <input type="checkbox"/> |
| 2    | 5.8×10 <sup>-7</sup>  | <a href="#">gi 27706430 ref XP_228520.1 </a> PREDICTED: similar to polycomb group ring finger 6 isoform a [Rattus norvegicus]     | <a href="#">17</a> | 5.1 | 25.46 | <input type="checkbox"/> |
| 3    | 8.0×10 <sup>-7</sup>  | <a href="#">gi 34013518 ref NP_898874.1 </a> RT1 class II, locus DOa [Rattus norvegicus]                                          | <a href="#">14</a> | 6.4 | 28.51 | <input type="checkbox"/> |
| 4    | 8.0×10 <sup>-7</sup>  | <a href="#">gi 9438772 gb AAB35455.2 </a> major histocompatibility complex class II alpha chain [Rattus sp.]                      | <a href="#">16</a> | 5.8 | 25.34 | <input type="checkbox"/> |
| 5    | 9.1×10 <sup>-7</sup>  | <a href="#">gi 2499750 sp Q63340 DUS7_RAT</a> Dual specificity protein phosphatase 7 (Dual specificity protein phosphatase MKP-X) | <a href="#">10</a> | 4.9 | 31.05 | <input type="checkbox"/> |
| 6    | 9.2×10 <sup>-7</sup>  | <a href="#">gi 56404684 sp Q6QA27 TRI44_RAT</a> Tripartite motif-containing protein 44 (Protein DIPB)                             | <a href="#">11</a> | 4.1 | 38.70 | <input type="checkbox"/> |
| 7    | 1.0×10 <sup>-6</sup>  | <a href="#">gi 13928892 ref NP_113834.1 </a> receptor activity modifying protein 2 [Rattus norvegicus]                            | <a href="#">15</a> | 5.0 | 20.57 | <input type="checkbox"/> |
| 8    | 1.0×10 <sup>-6</sup>  | <a href="#">gi 204044 gb AAA41120.1 </a> entactin                                                                                 | <a href="#">11</a> | 4.3 | 26.55 | <input type="checkbox"/> |
| 9    | 2.1×10 <sup>-6</sup>  | <a href="#">gi 16758656 ref NP_446264.1 </a> BCL2-antagonist/killer 1 [Rattus norvegicus]                                         | <a href="#">15</a> | 5.5 | 23.25 | <input type="checkbox"/> |
| 10   | 5.4×10 <sup>-6</sup>  | <a href="#">gi 16758526 ref NP_446158.1 </a> doublesex and mab-3 related transcription factor 1 [Rattus norvegicus]               | <a href="#">9</a>  | 6.2 | 39.88 | <input type="checkbox"/> |
| 11   | 6.2×10 <sup>-6</sup>  | <a href="#">gi 128201 sp P08460 NID1_RAT</a> Nidogen-1 (Entactin)                                                                 | <a href="#">8</a>  | 4.6 | 35.99 | <input type="checkbox"/> |
| 12   | 9.6×10 <sup>-6</sup>  | <a href="#">gi 21667355 gb AAM74035.1 </a> allantoicase [Rattus norvegicus]                                                       | <a href="#">15</a> | 5.6 | 21.40 | <input type="checkbox"/> |
| 13   | 1.1×10 <sup>-5</sup>  | <a href="#">gi 34871770 ref XP_342933.1 </a> PREDICTED: similar to ATP binding domain 1 family, member B [Rattus norvegicus]      | <a href="#">10</a> | 4.9 | 34.83 | <input type="checkbox"/> |
| 14   | 1.6×10 <sup>-5</sup>  | <a href="#">gi 477540 pir A49183</a> retinal particulate-guanylate cyclase - rat (fragments)                                      | <a href="#">8</a>  | 4.9 | 38.02 | <input type="checkbox"/> |
| 15   | 1.6×10 <sup>-5</sup>  | <a href="#">gi 13928908 ref NP_113844.1 </a> syntaxin 8 [Rattus norvegicus]                                                       | <a href="#">17</a> | 4.9 | 27.12 | <input type="checkbox"/> |
| 16   | 4.2×10 <sup>-5</sup>  | <a href="#">gi 34861797 ref XP_344982.1 </a> PREDICTED: similar to calcium binding protein 4 [Rattus norvegicus]                  | <a href="#">7</a>  | 5.0 | 30.47 | <input type="checkbox"/> |
| 17   | 4.8×10 <sup>-5</sup>  | <a href="#">gi 19386562 gb AAL86569.1 </a> vesicular protein vp-165 short isoform [Rattus norvegicus]                             | <a href="#">8</a>  | 5.2 | 38.83 | <input type="checkbox"/> |
| 18   | 5.1×10 <sup>-5</sup>  | <a href="#">gi 55250746 gb AAH85816.1 </a> WD repeat domain 45 [Rattus norvegicus]                                                | <a href="#">6</a>  | 6.5 | 35.31 | <input type="checkbox"/> |
| 19   | 1.9×10 <sup>-4</sup>  | <a href="#">gi 38970029 gb AAH63148.1 </a> F-box only protein 6b [Rattus norvegicus]                                              | <a href="#">7</a>  | 6.0 | 33.17 | <input type="checkbox"/> |
| 20   | 1.9×10 <sup>-4</sup>  | <a href="#">gi 3184552 gb AAC18967.1 </a> syntaxin 13 [Rattus norvegicus]                                                         | <a href="#">10</a> | 5.4 | 30.56 | <input type="checkbox"/> |

|    |                      |                                                                                                                                                                                                       |                    |     |       |                          |
|----|----------------------|-------------------------------------------------------------------------------------------------------------------------------------------------------------------------------------------------------|--------------------|-----|-------|--------------------------|
| 21 | 1.9×10 <sup>-4</sup> | <a href="#">gi 3213231 gb AAC23484.1</a> syntaxin 12 [Rattus norvegicus]                                                                                                                              | <a href="#">10</a> | 5.4 | 31.21 | <input type="checkbox"/> |
| 22 | 2.2×10 <sup>-4</sup> | <a href="#">gi 51315729 sp Q923V4 FBX6_RAT</a> F-box only protein 6 (F-box only protein 6b) (F-box/G-domain protein 2)                                                                                | <a href="#">7</a>  | 6.4 | 33.17 | <input type="checkbox"/> |
| 23 | 3.8×10 <sup>-4</sup> | <a href="#">gi 52695718 pdb 1TDQ A</a> Chain A, Structural Basis For The Interactions Between Tenascins And The C-Type Lectin Domains From Lecticans: Evidence For A Cross-Linking Role For Tenascins | <a href="#">11</a> | 4.8 | 30.28 | <input type="checkbox"/> |
| 24 | 9.3×10 <sup>-4</sup> | <a href="#">gi 9506919 ref NP_062080.1</a> neurogenic differentiation 3 [Rattus norvegicus]                                                                                                           | <a href="#">12</a> | 6.4 | 26.56 | <input type="checkbox"/> |
| 25 | 2.5×10 <sup>-3</sup> | <a href="#">gi 56971793 gb AAH88192.1</a> Angiotensin-like 3 [Rattus norvegicus]                                                                                                                      | <a href="#">5</a>  | 6.1 | 37.14 | <input type="checkbox"/> |
| 26 | 8.1×10 <sup>-3</sup> | <a href="#">gi 55715651 gb AAH85739.1</a> 3-hydroxyanthranilate 3,4-dioxygenase [Rattus norvegicus]                                                                                                   | <a href="#">6</a>  | 5.5 | 32.82 | <input type="checkbox"/> |
| 27 | 9.6×10 <sup>-3</sup> | <a href="#">gi 9910256 ref NP_064461.1</a> 3-hydroxyanthranilate 3,4-dioxygenase [Rattus norvegicus]                                                                                                  | <a href="#">6</a>  | 5.6 | 32.85 | <input type="checkbox"/> |

## NOTE:

1. To search again using [unmatched masses](#), click the symbol .

**Input Summary****Search id** A3BCB3F3-1668-53F11A39**Sequences** 20076**Date & Time** Tue Feb 20 17:53:41 2007 UTC (Search Time: 0.33 sec.)**Sample ID** 20040813 richardson NIA set 1 spot 1211 CONSENSUS search**Database** NCBIInr [..\databases\nr]**Taxonomy** Rattus**Mass Range** 20 - 40 kDa**pI Range** 4.0 -7.0**Digestion** Trypsin**Missed Cuts** 0**Modifications** +C2H3ON@C(Complete);**Charge State** MH+**Masses (avg)****Tolerance (avg)** 1.00 ppm

**Masses (mon)** 703.804 705.713 708.805 710.721 712.746 717.707 723.823 726.719 732.800  
733.820 736.753 739.730 740.680 745.701 749.652 751.640 754.702 756.697  
764.798 767.812 772.662 778.671 782.690 784.666 790.702 796.705 798.679  
804.884 806.639 810.653 815.675 821.695 823.758 828.647 834.637 835.724  
841.721 848.443 849.755 852.658 858.715 859.661 865.643 867.741 873.633  
875.641 878.667 881.739 887.678 893.657 897.641 903.673 906.545 909.605  
912.568 918.610 924.692 925.612 930.631 936.629 938.668 941.657 947.629  
952.624 958.631 964.531 970.680 971.644 977.648 978.636 981.625 984.598  
985.590 991.531 993.776 996.576 1002.593 1008.606 1015.580 1021.525  
1023.546 1025.569 1028.630 1034.699 1035.499 1038.531 1043.543 1051.596  
1057.558 1059.527 1061.542 1067.532 1071.557 1079.496 1082.481 1085.537  
1092.661 1094.529 1099.563 1105.526 1107.427 1113.478 1115.499 1123.397  
1130.599 1136.895 1137.439 1142.548 1145.506 1151.546 1154.332 1161.518  
1163.490 1166.498 1171.326 1180.436 1183.512 1187.472 1190.510 1197.483  
1204.452 1209.453 1216.480 1224.469 1227.484 1234.446 1241.830 1242.447  
1249.451 1252.520 1254.449 1262.467 1265.145 1268.401 1271.445 1280.359  
1285.395 1292.374 1295.447 1299.445 1306.389 1310.429 1313.450 1322.241  
1325.448 1328.363 1336.811 1338.484 1345.409 1351.337 1353.415 1360.801  
1362.464 1366.638 1370.322 1377.328 1380.401 1387.433 1391.471 1400.318  
1403.240 1410.508 1416.426 1424.286 1426.216 1430.463 1433.314 1435.429  
1442.345 1449.585 1450.353 1457.434 1459.386 1466.798 1467.365 1471.285  
1478.365 1486.447 1488.471 1495.331 1500.435 1503.434 1506.409 1513.259  
1516.323 1519.363 1522.013 1527.320 1530.398 1532.400 1539.704 1544.328  
1546.391 1548.403 1555.374 1559.383 1562.361 1565.314 1572.350 1574.378  
1577.370 1584.299 1587.354 1594.278 1602.294 1603.345 1612.249 1620.446  
1624.322 1629.342 1633.365 1641.479 1644.780 1649.340 1658.316 1663.170  
1672.376 1673.257 1676.231 1685.225 1691.114 1700.147 1703.285 1715.192  
1717.450 1719.375 1729.156 1736.243 1746.212 1753.193 1759.285 1767.395  
1768.301 1779.099 1780.178 1788.309 1800.167 1808.200 1812.295 1814.272  
1822.049 1824.233 1828.202 1830.217 1832.176 1840.597 1842.243 1851.007  
1854.164 1857.266 1867.199 1875.410 1879.026 1886.181 1895.868 1902.175  
1910.285 1913.140 1923.989 1927.179 1932.175 1940.142 1942.604 1950.771  
1956.423 1962.084 1965.156 1975.165 1978.067 1986.009 1994.597 1996.702  
1999.952 2009.988 2018.477 2023.107 2032.170 2035.023 2043.139 2052.918  
2057.006 2066.941 2075.488 2079.599 2086.021 2096.579 2102.008 2111.153  
2113.010 2115.857 2120.071 2129.007 2130.623 2138.834 2143.132 2148.995  
2158.649 2161.747 2176.483 2181.448 2188.182 2195.620 2206.675 2209.997  
2220.930 2225.564 2234.975 2237.904 2246.894 2249.512 2258.654 2268.327  
2277.507 2279.178 2288.767 2299.537 2303.736 2306.678 2315.903 2318.949  
2328.036 2331.709 2346.655 2356.646 2362.991 2371.706 2382.243 2386.024  
2395.571 2405.468 2414.260 2418.861 2423.665 2433.951 2443.195 2446.791  
2455.559 2459.130 2462.871 2472.906 2478.937 2489.946 2492.870 2497.747  
2502.461 2508.966 2520.311 2524.877 2534.427 2546.170 2555.114 2558.281  
2566.871 2573.084 2584.094 2586.628 2598.972 2604.399 2613.754 2625.783  
2633.968 2644.138 2646.632 2651.831 2663.496 2674.907 2684.877 2690.534  
2697.769 2705.155 2711.532 2722.203 2725.578 2735.994 2739.483 2746.501  
2760.884 2764.247 2768.285 2780.096 2791.613 2794.567 2799.126 2809.468



|          |          |          |          |          |          |          |          |
|----------|----------|----------|----------|----------|----------|----------|----------|
| 2815.039 | 2828.633 | 2838.672 | 2841.938 | 2847.253 | 2860.313 | 2868.892 | 2875.605 |
| 2880.157 | 2890.033 | 2896.299 | 2900.795 | 2913.687 | 2918.196 | 2928.792 | 2939.298 |
| 2942.147 | 2952.347 | 2956.484 | 2962.346 | 2972.251 | 2976.218 | 2979.746 | 2990.122 |
| 2994.396 | 3001.255 | 3004.724 | 3015.624 | 3024.951 | 3037.447 | 3041.309 | 3051.159 |
| 3057.040 | 3064.529 | 3069.153 | 3075.760 | 3086.864 | 3090.158 | 3093.903 | 3104.776 |
| 3109.957 | 3122.890 | 3139.585 | 3145.853 | 3159.428 | 3173.222 | 3180.739 | 3191.611 |
| 3197.701 | 3209.289 | 3216.007 | 3228.624 | 3232.911 | 3240.229 | 3250.588 | 3264.772 |
| 3270.393 | 3281.340 | 3285.006 | 3296.093 | 3307.625 | 3313.282 | 3317.703 | 3321.428 |
| 3334.559 | 3340.395 | 3347.327 | 3355.007 | 3366.212 | 3372.857 | 3384.523 | 3396.444 |
| 3400.448 | 3412.200 | 3416.567 | 3422.002 | 3428.466 | 3439.949 | 3449.317 | 3460.321 |
| 3468.367 | 3479.202 | 3485.402 | 3499.728 | 3508.418 | 3520.594 | 3525.191 | 3532.551 |
| 3544.247 | 3549.902 | 3562.873 | 3583.925 | 3600.350 | 3612.644 | 3620.500 | 3625.566 |
| 3637.576 | 3640.623 | 3648.021 | 3661.657 | 3673.931 | 3683.161 | 3695.757 |          |

**Tolerance (mon)** 19.00 ppm

**Number of Peptides** 487

# Laboratory of Mass Spectrometry and Gaseous Ion Chemistry

## PROWL

- ▶ **ProFound**
- ▶ **ProteinInfo**
- ▶ **PeptideMap**
- ▶ **PepFrag**
- ▶ **X! Tandem**
- ▶ **X! Hunter**
- ▶ **GPMDDB**
- ▶ **PROWL Home**
- ▶ **Chait Lab**



The Rockefeller University  
1230 York Avenue,  
New York, NY 10021  
(212) 327-8000



**National Center for  
Research Resources**

National Resource  
for the Mass Spectrometric  
Analysis of Biological  
Macromolecules

## ProFound



### Protein Candidates

| Rank | Expectation          | Protein Information and Sequence Analyse Tools (T)                                                 | %  | pI  | kDa   | R |
|------|----------------------|----------------------------------------------------------------------------------------------------|----|-----|-------|---|
| +1   | $3.7 \times 10^{-3}$ | gi 207498 gb AAA42289.1  embryonic fibroblast tropomyosin 1                                        | 20 | 4.6 | 33.00 | ● |
|      |                      | gi 20178269 sp P58775 TPM2_RAT Tropomyosin beta chain (Tropomyosin 2) (Beta-tropomyosin)           | 10 | 4.7 | 32.93 | ● |
| +2   | $5.5 \times 10^{-3}$ | gi 2145145 gb AAB58429.1  apolipoprotein A-I [Rattus norvegicus]                                   | 38 | 5.5 | 29.96 | ● |
|      |                      | gi 2145143 gb AAB58428.1  apolipoprotein A-I [Rattus norvegicus]                                   | 29 | 5.5 | 29.87 | ● |
| +3   | 0.018                | gi 6978515 ref NP_036870.1  apolipoprotein A-I [Rattus norvegicus]                                 | 33 | 5.5 | 30.10 | ● |
|      |                      | gi 113997 sp P04639 APOA1_RAT Apolipoprotein A-I precursor (Apo-AI) (ApoA-I)                       | 27 | 5.5 | 30.13 | ● |
| 4    | 0.029                | gi 37589620 gb AAH59151.1  Emd protein [Rattus norvegicus]                                         | 32 | 5.0 | 29.57 | ● |
|      |                      | gi 34863185 ref XP_234036.2  PREDICTED: similar to expressed sequence AW125753 [Rattus norvegicus] | 22 | 5.4 | 33.07 | ● |
|      |                      | gi 27661844 ref XP_219510.1  PREDICTED: similar to expressed sequence AI842788 [Rattus norvegicus] | 24 | 5.0 | 22.46 | ● |
|      |                      | gi 25452816 sp Q63149 CADH4_RAT Cadherin-4 (Retinal-cadherin) (R-cadherin) (R-CAD)                 | 21 | 4.5 | 32.89 | ● |
|      |                      | gi 18266686 ref NP_543163.1  thioredoxin-like (32kD) [Rattus norvegicus]                           | 24 | 4.8 | 32.63 | ● |
|      |                      | gi 1323728 gb AAB00334.1  phosducin-like protein [Rattus norvegicus]                               | 19 | 4.9 | 25.25 | ● |
|      |                      | gi 27227451 gb AAN85424.1  MHC class Ib antigen [Rattus norvegicus]                                | 30 | 5.1 | 31.90 | ● |

|   |                                                                                                                                                         |    |     |       |  |
|---|---------------------------------------------------------------------------------------------------------------------------------------------------------|----|-----|-------|--|
| - | <a href="#">gi 9507243 ref NP_062250.1</a> tyrosine 3-monooxygenase/tryptophan 5-monooxygenase activation protein, beta polypeptide [Rattus norvegicus] | 18 | 4.8 | 28.15 |  |
| - | <a href="#">gi 40018538 ref NP_954528.1</a> androgen-responsive gene encoding an ARD-like protein [Rattus norvegicus]                                   | 27 | 5.3 | 21.36 |  |
| - | <a href="#">gi 27680212 ref XP_219321.1</a> PREDICTED: similar to synaptonemal complex protein 3 [Rattus norvegicus]                                    | 20 | 5.6 | 27.44 |  |
| - | <a href="#">gi 55976166 sp Q68VK5 TSN5_RAT</a> Tetraspanin-5 (Tspan-5) (Transmembrane 4 superfamily member 9)                                           | 29 | 4.6 | 30.98 |  |
| - | <a href="#">gi 14192925 ref NP_062004.1</a> tropomyosin 1, alpha isoform f [Rattus norvegicus]                                                          | 24 | 4.8 | 28.91 |  |
| - | <a href="#">gi 41386755 ref NP_958824.1</a> FGFR1 oncogene partner 2 [Rattus norvegicus]                                                                | 25 | 5.6 | 29.53 |  |
| - | <a href="#">gi 56605828 ref NP_001008377.1</a> trafficking protein particle complex 3 [Rattus norvegicus]                                               | 17 | 4.8 | 20.46 |  |
| - | <a href="#">gi 8926237 gb AAF81755.1 AF269283_1</a> potassium channel auxiliary subunit KCHIP2a [Rattus norvegicus]                                     | 17 | 4.9 | 31.26 |  |
| - | <a href="#">gi 8926239 gb AAF81756.1 AF269284_1</a> potassium channel auxiliary subunit KCHIP2b [Rattus norvegicus]                                     | 18 | 4.8 | 29.31 |  |
| - | <a href="#">gi 3184552 gb AAC18967.1</a> syntaxin 13 [Rattus norvegicus]                                                                                | 20 | 5.4 | 30.56 |  |
| - | <a href="#">gi 8394091 ref NP_058953.1</a> proteasome activator subunit 2 [Rattus norvegicus]                                                           | 19 | 5.5 | 27.07 |  |

## NOTE:

1. To search again using **unmatched masses**, click the symbol .
2. Highly similar protein sequences were given the same rank (click "+" to expand/contract).

**Input Summary**

Search id A752F181-12F4-57651D8A

Sequences 20092

Date &amp; Time Thu Jan 25 18:48:42 2007 UTC (Search Time: 0.49 sec.)

Sample ID

Database NCBI nr [..\databases\nr]

Taxonomy Rattus



**Mass Range** 20 - 34 kDa

**pI Range** 4.5 -5.6

**Digestion** Trypsin

**Missed Cuts** 1

**Modifications** +C2H3ON@C(Complete); +O@M(Partial);

**Charge State** MH+

**Masses (avg)**

**Tolerance (avg)** 1.00 ppm

**Masses (mon)** 706.377 712.358 718.886 719.391 722.370 726.405 728.436  
734.418 739.401 740.407 743.411 745.428 750.430 753.380  
755.411 763.435 767.378 773.426 780.398 786.345 787.439  
793.376 794.418 797.358 803.408 804.400 813.466 814.406  
820.462 822.409 824.493 827.489 833.477 835.401 840.482  
848.436 850.475 856.487 863.469 880.529 882.506 888.450  
891.460 898.523 899.451 902.459 905.452 912.468 913.423  
920.511 932.489 934.503 940.682 941.507 944.503 946.509  
953.517 955.491 961.948 962.532 963.472 969.536 970.563  
979.553 982.440 988.522 993.520 999.508 1003.554 1016.488  
1022.761 1023.579 1036.534 1042.521 1051.664 1052.515  
1058.570 1060.541 1067.498 1068.531 1079.644 1082.520  
1088.638 1090.526 1091.549 1097.536 1098.584 1104.547  
1105.576 1107.545 1114.520 1116.565 1124.561 1133.559  
1134.533 1138.571 1140.570 1147.557 1149.564 1155.571  
1163.591 1172.629 1187.631 1200.653 1208.594 1210.654  
1215.599 1218.627 1225.661 1226.651 1229.575 1234.654  
1242.635 1244.652 1251.642 1254.667 1259.678 1263.694  
1270.857 1271.625 1273.594 1285.606 1289.615 1296.706  
1302.601 1308.656 1315.702 1316.605 1328.672 1332.575  
1339.685 1347.628 1349.630 1352.673 1372.723 1374.694  
1381.665 1391.715 1392.770 1400.114 1400.643 1403.617  
1406.670 1413.747 1415.722 1423.710 1424.726 1434.754  
1442.745 1449.759 1462.755 1470.773 1483.034 1483.760  
1485.731 1491.731 1501.131 1501.678 1504.732 1515.719  
1517.737 1520.728 1528.719 1533.750 1540.982 1541.774  
1554.992 1555.789 1557.781 1564.749 1569.760 1576.728  
1580.741 1584.731 1592.781 1598.751 1605.865 1606.728  
1609.779 1615.808 1619.625 1627.791 1628.741 1637.801

|          |          |          |          |          |          |
|----------|----------|----------|----------|----------|----------|
| 1646.777 | 1649.811 | 1657.778 | 1665.874 | 1670.879 | 1678.869 |
| 1679.669 | 1683.810 | 1691.859 | 1696.875 | 1724.750 | 1726.792 |
| 1737.860 | 1740.837 | 1744.800 | 1752.853 | 1755.842 | 1763.891 |
| 1783.884 | 1784.851 | 1788.835 | 1791.713 | 1800.044 | 1800.815 |
| 1802.902 | 1811.088 | 1812.836 | 1821.993 | 1829.934 | 1834.920 |
| 1847.894 | 1850.876 | 1860.884 | 1863.964 | 1867.920 | 1875.873 |
| 1877.886 | 1888.844 | 1890.952 | 1897.927 | 1906.943 | 1909.885 |
| 1918.016 | 1926.962 | 1928.913 | 1937.025 | 1941.948 | 1950.950 |
| 1955.950 | 1964.059 | 1967.971 | 1976.374 | 1978.950 | 1984.946 |
| 2003.078 | 2006.033 | 2009.050 | 2011.949 | 2019.871 | 2027.900 |
| 2031.996 | 2036.005 | 2044.126 | 2046.015 | 2054.034 | 2064.027 |
| 2069.048 | 2078.985 | 2083.010 | 2093.011 | 2095.045 | 2106.961 |
| 2115.966 | 2118.911 | 2128.035 | 2138.019 | 2140.979 | 2150.057 |
| 2160.062 | 2169.965 | 2182.029 | 2184.043 | 2192.046 | 2195.074 |
| 2204.077 | 2208.126 | 2219.915 | 2229.128 | 2233.105 | 2236.129 |
| 2245.088 | 2256.081 | 2265.047 | 2268.126 | 2277.374 | 2280.139 |
| 2283.131 | 2292.442 | 2295.119 | 2309.081 | 2314.133 | 2323.475 |
| 2326.170 | 2352.135 | 2364.238 | 2367.252 | 2376.076 | 2393.281 |
| 2399.018 | 2409.985 | 2418.292 | 2424.093 | 2437.045 | 2440.238 |
| 2450.232 | 2455.336 | 2464.290 | 2468.237 | 2481.206 | 2492.427 |
| 2500.370 | 2509.879 | 2523.126 | 2527.324 | 2539.905 | 2546.427 |
| 2552.176 | 2561.476 | 2566.217 | 2577.354 | 2581.255 | 2594.381 |
| 2600.115 | 2611.291 | 2614.012 | 2625.218 | 2628.222 | 2634.339 |
| 2645.069 | 2654.815 | 2660.302 | 2666.457 | 2677.287 | 2688.594 |
| 2695.235 | 2705.212 | 2718.123 | 2728.390 | 2734.129 | 2741.179 |
| 2753.363 | 2763.554 | 2766.423 | 2776.141 | 2779.337 | 2783.353 |
| 2793.563 | 2808.040 | 2821.409 | 2826.278 | 2831.223 | 2842.420 |
| 2853.962 | 2868.270 | 2881.456 | 2888.585 | 2900.438 | 2904.395 |
| 2917.664 | 2928.665 | 2932.495 | 2944.694 | 2955.014 | 2964.471 |
| 2972.364 | 2983.505 | 2993.340 | 3002.747 | 3009.064 | 3020.273 |
| 3029.389 | 3039.708 | 3053.691 | 3067.894 | 3080.035 | 3083.476 |
| 3092.575 | 3099.473 | 3111.601 | 3124.619 | 3129.668 | 3141.515 |
| 3149.300 | 3161.676 | 3174.533 | 3177.609 | 3188.519 | 3192.667 |
| 3203.603 | 3214.596 | 3221.705 | 3227.598 | 3234.491 | 3246.688 |
| 3250.835 | 3263.680 | 3275.700 | 3288.708 | 3292.651 | 3304.415 |
| 3312.282 | 3324.042 | 3326.761 | 3338.858 | 3350.704 | 3353.824 |
| 3366.791 | 3371.680 | 3380.841 | 3392.525 | 3396.882 | 3408.280 |
| 3420.563 | 3423.045 | 3434.763 | 3445.590 | 3450.061 | 3462.220 |
| 3467.852 | 3484.813 | 3510.512 | 3514.865 | 3524.537 | 3547.211 |

3560.103 3571.004 3580.673 3594.998 3608.744 3618.706  
3631.604 3650.140 3667.212 3685.592 3690.051

**Tolerance** 13.00 ppm  
**(mon)**

**Number of** 429  
**Peptides**

# Laboratory of Mass Spectrometry and Gaseous Ion Chemistry

## PROWL

- ▶ **ProFound**
- ▶ **ProteinInfo**
- ▶ **PeptideMap**
- ▶ **PepFrag**
- ▶ **X! Tandem**
- ▶ **X! Hunter**
- ▶ **GPMDDB**
- ▶ **PROWL Home**
- ▶ **Chait Lab**



The Rockefeller University  
1230 York Avenue,  
New York, NY 10021  
(212) 327-8000



**National Center for  
Research Resources**

National Resource  
for the Mass Spectrometric  
Analysis of Biological  
Macromolecules

## ProFound



### Protein Candidates

| Rank | Expectation           | Protein Information and Sequence Analyse Tools (T)                                                                                                                                    | %  | pI  | kDa   | R |
|------|-----------------------|---------------------------------------------------------------------------------------------------------------------------------------------------------------------------------------|----|-----|-------|---|
| 1    | 8.3×10 <sup>-36</sup> | gi 57528169 ref NP_001009624.1  hypothetical protein LOC287598 [Rattus norvegicus]                                                                                                    | 63 | 5.7 | 16.67 | ⊙ |
| 2    | 1.6×10 <sup>-9</sup>  | gi 2145098 gb AAB63349.1  G-protein coupled inward rectifier potassium channel splice variant Kir3.1b [Rattus norvegicus]                                                             | 46 | 5.5 | 13.58 | ⊙ |
| 3    | 1.8×10 <sup>-9</sup>  | gi 3891677 pdb 1BE9 A Chain A, The Third Pdz Domain From The Synaptic Protein Psd-95 In Complex With A C-Terminal Peptide Derived From Cript.                                         | 37 | 5.1 | 12.72 | ⊙ |
| 4    | 2.5×10 <sup>-9</sup>  | gi 27664048 ref XP_213753.1  PREDICTED: similar to DNA-directed RNA polymerase II 13.3 kDa polypeptide (RPB11) [Rattus norvegicus]                                                    | 28 | 5.6 | 13.33 | ⊙ |
| 5    | 2.8×10 <sup>-7</sup>  | gi 51854249 ref NP_001004095.1  S100 calcium binding protein A11 [Rattus norvegicus]                                                                                                  | 44 | 5.6 | 11.22 | ⊙ |
| 6    | 8.9×10 <sup>-7</sup>  | gi 16758754 ref NP_446336.1  ATPase, H <sup>+</sup> transporting, V1 subunit F [Rattus norvegicus]                                                                                    | 48 | 5.5 | 13.35 | ⊙ |
| +7   | 1.4×10 <sup>-6</sup>  | gi 643039 emb CAA57089.1  variable region-alpha RAV4.25 [Rattus norvegicus]                                                                                                           | 32 | 5.0 | 10.05 | ⊙ |
|      | -                     | gi 643041 emb CAA57090.1  variable region-alpha RAV4.26 [Rattus norvegicus]                                                                                                           | 32 | 5.3 | 10.02 | ⊙ |
|      | -                     | gi 9857600 dbj BAB11956.1  prepro-des-Gln14-ghrelin [Rattus norvegicus]                                                                                                               | 34 | 5.6 | 13.09 | ⊙ |
|      | -                     | gi 52695719 pdb 1TDQ B Chain B, Structural Basis For The Interactions Between Tenascins And The C-Type Lectin Domains From Lecticans: Evidence For A Cross-Linking Role For Tenascins | 28 | 5.0 | 15.98 | ⊙ |
|      | -                     | gi 13786138 ref NP_112608.1  t-complex testis expressed 1 [Rattus norvegicus]                                                                                                         | 14 | 5.0 | 12.66 | ⊙ |

|   |                                                                                                                                        |    |     |       |   |
|---|----------------------------------------------------------------------------------------------------------------------------------------|----|-----|-------|---|
| - | gi 11067387 ref NP_067701.1  ghrelin precursor [Rattus norvegicus]                                                                     | 33 | 5.6 | 13.22 | 🔴 |
| - | gi 2143802 pir  I57802 Ig lambda2-like chain - rat (fragment)                                                                          | 28 | 5.1 | 8.89  | 🔴 |
| - | gi 5830494 emb CAB54560.1  cysteine sulfinatase decarboxylase [Rattus norvegicus]                                                      | 31 | 5.6 | 12.27 | 🔴 |
| - | gi 643047 emb CAA57093.1  variable region-alpha RAV4.33 [Rattus norvegicus]                                                            | 22 | 4.9 | 10.19 | 🔴 |
| - | gi 47087087 ref NP_998732.1  zinc ribbon domain containing 1 [Rattus norvegicus]                                                       | 24 | 4.9 | 14.08 | 🔴 |
| - | gi 643027 emb CAA57083.1  variable region-alpha RAV4.12 [Rattus norvegicus]                                                            | 19 | 5.5 | 9.93  | 🔴 |
| - | gi 643031 emb CAA57085.1  variable region-alpha RAV4.14 [Rattus norvegicus]                                                            | 19 | 5.5 | 10.01 | 🔴 |
| - | gi 5327243 emb CAB46337.1  RT1-A [Rattus norvegicus]                                                                                   | 24 | 5.4 | 8.21  | 🔴 |
| - | gi 19110875 gb AAL85327.1 AF474162_1 global ischemia induced gene GIIG15B [Rattus norvegicus]                                          | 49 | 4.8 | 8.36  | 🔴 |
| - | gi 31542843 ref NP_598305.2  homeobox only domain [Rattus norvegicus]                                                                  | 49 | 4.8 | 8.38  | 🔴 |
| - | gi 203355 gb AAA40888.1  CCAAT binding transcription factor-B subunit                                                                  | 25 | 4.9 | 16.51 | 🔴 |
| - | gi 205574 gb AAA41652.1  myosin heavy chain                                                                                            | 18 | 5.3 | 15.40 | 🔴 |
| - | gi 643051 emb CAA57095.1  variable region-alpha RAV4.35 [Rattus norvegicus]                                                            | 22 | 5.2 | 10.24 | 🔴 |
| - | gi 544788 gb AAB29567.1  platelet-derived growth factor beta-receptor, PDGF beta receptor [rats, Rat-1 cells, Peptide Partial, 102 aa] | 36 | 4.9 | 11.43 | 🔴 |
| - | gi 53733524 gb AAH83728.1  Similar to Ubiquitin-like protein SMT3A precursor (Ubiquitin-related protein SUMO-2) [Rattus norvegicus]    | 11 | 5.6 | 12.55 | 🔴 |
| - | gi 13242275 ref NP_077350.1  myotrophin [Rattus norvegicus]                                                                            | 31 | 5.3 | 13.01 | 🔴 |
| - | gi 5852192 gb AAD53965.1  GTP-binding protein [Rattus norvegicus]                                                                      | 25 | 5.5 | 13.18 | 🔴 |
| - | gi 27666688 ref XP_213616.1  PREDICTED: similar to Stefin homolog [Rattus norvegicus]                                                  | 25 | 5.7 | 11.07 | 🔴 |

|   |                                |                                                      |    |     |       |   |
|---|--------------------------------|------------------------------------------------------|----|-----|-------|---|
| - | gi 688395 gb AAB31189.1        | zinc finger transcription factor; Kid-1 [Rattus sp.] | 41 | 5.4 | 12.68 | 🔴 |
| - | gi 6685834 sp Q9WVB1 RAB6A_RAT | Ras-related protein Rab-6A (Rab-6)                   | 12 | 5.3 | 15.87 | 🔴 |

## NOTE:

1. To search again using **unmatched masses**, click the symbol 🔴.
2. Highly similar protein sequences were given the same rank (click "+" to expand/contract).

**Input Summary****Search id** B71C303B-032C-672D2D52**Sequences** 20092**Date & Time** Wed Jan 24 21:16:08 2007 UTC (Search Time: 0.28 sec.)**Sample ID****Database** NCBI nr [..\databases\nr]**Taxonomy** Rattus**Mass Range** 8 - 17 kDa**pI Range** 4.8 -5.8**Digestion** Trypsin**Missed Cuts** 1**Modifications** +C2H3ON@C(Complete); +O@M(Partial); +HPO3@STY(Partial);**Charge State** MH+**Masses (avg)****Tolerance (avg)** 1.00 ppm

**Masses (mon)** 704.537 710.546 719.427 721.466 724.504 729.544 734.437  
737.447 739.475 743.485 748.517 749.455 752.459 757.429  
763.585 765.537 768.517 772.567 779.498 781.471 787.498  
793.435 794.439 798.519 804.421 805.451 813.487 816.617  
822.411 824.534 826.466 832.451 838.516 840.523 848.419  
854.542 860.628 866.498 879.454 881.450 883.528 889.476  
890.499 899.513 905.515 907.499 913.507 919.738 920.432  
922.515 929.494 935.513 937.468 943.450 944.504 947.504  
953.518 955.513 961.699 962.555 963.577 969.496 979.555  
988.798 989.581 993.521 999.531 1002.510 1018.528  
1022.611 1037.531 1043.498 1051.686 1058.460 1060.541

|          |          |          |          |          |          |
|----------|----------|----------|----------|----------|----------|
| 1064.598 | 1067.695 | 1073.860 | 1074.543 | 1080.595 | 1086.774 |
| 1087.572 | 1090.548 | 1096.689 | 1097.469 | 1102.579 | 1106.537 |
| 1112.678 | 1115.485 | 1124.559 | 1133.558 | 1138.547 | 1141.477 |
| 1147.555 | 1150.543 | 1154.541 | 1156.553 | 1162.763 | 1163.589 |
| 1173.549 | 1177.540 | 1186.632 | 1187.606 | 1190.553 | 1196.644 |
| 1203.801 | 1204.525 | 1207.632 | 1211.588 | 1219.588 | 1220.599 |
| 1228.652 | 1230.564 | 1234.627 | 1238.627 | 1245.694 | 1246.597 |
| 1251.615 | 1254.736 | 1260.631 | 1268.145 | 1270.758 | 1284.614 |
| 1291.739 | 1292.683 | 1298.666 | 1301.651 | 1307.704 | 1314.795 |
| 1317.725 | 1328.668 | 1329.674 | 1336.702 | 1347.650 | 1351.655 |
| 1364.702 | 1372.669 | 1373.717 | 1381.686 | 1390.732 | 1397.769 |
| 1400.790 | 1408.661 | 1409.671 | 1415.591 | 1417.770 | 1425.103 |
| 1427.594 | 1430.699 | 1433.756 | 1436.739 | 1443.815 | 1445.759 |
| 1450.677 | 1454.756 | 1461.722 | 1462.803 | 1465.714 | 1468.781 |
| 1482.745 | 1500.735 | 1501.831 | 1504.806 | 1514.850 | 1516.684 |
| 1522.772 | 1528.767 | 1535.723 | 1543.832 | 1555.864 | 1558.733 |
| 1566.769 | 1571.783 | 1579.719 | 1583.842 | 1591.782 | 1595.840 |
| 1599.742 | 1603.837 | 1611.828 | 1613.855 | 1619.620 | 1627.786 |
| 1628.791 | 1637.823 | 1647.592 | 1648.767 | 1654.786 | 1657.800 |
| 1665.896 | 1668.865 | 1677.071 | 1677.871 | 1684.800 | 1688.920 |
| 1696.786 | 1698.118 | 1702.810 | 1724.828 | 1729.892 | 1734.684 |
| 1742.826 | 1750.958 | 1753.804 | 1762.754 | 1773.824 | 1782.625 |
| 1784.900 | 1787.831 | 1795.868 | 1796.953 | 1801.837 | 1813.803 |
| 1823.825 | 1829.983 | 1830.876 | 1848.927 | 1857.013 | 1862.879 |
| 1866.892 | 1875.396 | 1881.846 | 1891.000 | 1900.000 | 1909.050 |
| 1913.849 | 1919.892 | 1932.008 | 1936.895 | 1940.898 | 1949.034 |
| 1960.049 | 1969.989 | 1978.906 | 1988.023 | 1994.002 | 2002.009 |
| 2006.892 | 2012.961 | 2022.004 | 2028.035 | 2036.140 | 2038.024 |
| 2046.058 | 2055.023 | 2068.018 | 2071.909 | 2081.391 | 2082.990 |
| 2091.820 | 2095.147 | 2101.039 | 2112.259 | 2115.944 | 2120.004 |
| 2130.995 | 2142.014 | 2146.006 | 2150.125 | 2152.000 | 2161.194 |
| 2168.088 | 2181.970 | 2185.054 | 2194.099 | 2204.173 | 2209.172 |
| 2220.074 | 2225.091 | 2232.086 | 2235.110 | 2238.072 | 2248.087 |
| 2252.272 | 2256.013 | 2264.979 | 2268.122 | 2277.304 | 2279.040 |
| 2282.160 | 2292.177 | 2296.145 | 2308.070 | 2312.116 | 2315.161 |
| 2320.998 | 2324.211 | 2327.070 | 2338.846 | 2352.383 | 2362.390 |
| 2367.270 | 2378.097 | 2395.207 | 2399.033 | 2408.146 | 2411.056 |
| 2418.205 | 2421.253 | 2431.803 | 2439.183 | 2450.106 | 2457.380 |
| 2469.114 | 2479.869 | 2492.329 | 2502.259 | 2507.113 | 2510.284 |



|          |          |          |          |          |          |
|----------|----------|----------|----------|----------|----------|
| 2522.279 | 2533.319 | 2538.169 | 2549.279 | 2553.293 | 2564.197 |
| 2587.820 | 2599.484 | 2613.722 | 2616.167 | 2620.372 | 2629.415 |
| 2641.102 | 2645.362 | 2652.296 | 2663.235 | 2666.608 | 2677.332 |
| 2689.371 | 2694.229 | 2704.168 | 2707.216 | 2717.847 | 2721.465 |
| 2727.302 | 2741.110 | 2747.250 | 2757.180 | 2767.767 | 2774.504 |
| 2779.332 | 2789.356 | 2800.432 | 2806.317 | 2811.280 | 2824.761 |
| 2831.102 | 2842.404 | 2851.103 | 2861.436 | 2864.427 | 2873.304 |
| 2888.273 | 2895.482 | 2903.462 | 2907.384 | 2918.292 | 2928.491 |
| 2931.590 | 2936.662 | 2946.747 | 2950.369 | 2960.587 | 2968.620 |
| 2979.421 | 2982.400 | 2987.332 | 2991.568 | 3002.411 | 3008.283 |
| 3020.601 | 3030.977 | 3034.353 | 3043.860 | 3054.351 | 3065.195 |
| 3069.561 | 3074.751 | 3091.135 | 3096.568 | 3108.539 | 3111.808 |
| 3115.342 | 3128.441 | 3141.342 | 3145.156 | 3158.394 | 3161.386 |
| 3165.062 | 3177.468 | 3188.529 | 3200.333 | 3204.526 | 3213.877 |
| 3228.369 | 3245.234 | 3248.650 | 3261.219 | 3265.606 | 3276.781 |
| 3279.365 | 3283.379 | 3287.280 | 3292.419 | 3303.484 | 3307.591 |
| 3316.236 | 3330.102 | 3341.074 | 3344.698 | 3349.803 | 3353.743 |
| 3366.592 | 3376.019 | 3380.993 | 3386.871 | 3399.626 | 3409.493 |
| 3423.986 | 3426.904 | 3441.354 | 3457.894 | 3461.857 | 3474.117 |
| 3487.393 | 3507.196 | 3519.015 | 3530.576 | 3535.862 | 3550.098 |
| 3565.168 | 3569.031 | 3574.788 | 3594.998 | 3604.255 | 3618.426 |
| 3638.149 | 3645.793 | 3658.292 | 3662.735 | 3673.998 |          |

**Tolerance** 8.00 ppm  
**(mon)**

**Number of** 440  
**Peptides**



PROWL

- [ProFound](#)
- [ProteinInfo](#)
- [PeptideMap](#)
- [PepFrag](#)
- [X! Tandem](#)
- [X! Hunter](#)
- [GPMDB](#)
- [PROWL Home](#)
- [Chait Lab](#)

The Rockefeller  
University

The Rockefeller University  
1230 York Avenue,  
New York, NY 10021  
(212) 327-8000

National Center of  
Research Resources

National Resource  
for the Mass Spectrometric  
Analysis of Biological  
Macromolecules

## ProFound

### Protein Candidates

| Rank | Expectation           | Protein Information and Sequence Analyse Tools (T)                                                                                                                                          | %                  | pI  | kDa   | R                        |
|------|-----------------------|---------------------------------------------------------------------------------------------------------------------------------------------------------------------------------------------|--------------------|-----|-------|--------------------------|
| +1   | 6.5×10 <sup>-24</sup> | <a href="#">gi 8248633 gb AAB29536.2 </a> heat shock protein 27 [Rattus norvegicus]                                                                                                         | <a href="#">48</a> | 6.1 | 22.86 | <input type="checkbox"/> |
|      | -                     | <a href="#">gi 1170367 sp P42930 HSPB1_RAT</a> Heat-shock protein beta-1 (HspB1) (Heat shock 27 kDa protein) (HSP 27)                                                                       | <a href="#">48</a> | 6.1 | 22.93 | <input type="checkbox"/> |
| 2    | 1.2×10 <sup>-7</sup>  | <a href="#">gi 13592152 ref NP_112416.1 </a> glutathione S-transferase, mu type 3 [Rattus norvegicus]                                                                                       | <a href="#">20</a> | 6.9 | 25.83 | <input type="checkbox"/> |
| 3    | 1.3×10 <sup>-4</sup>  | <a href="#">gi 40217491 dbj BAD05179.1 </a> ankyrin repeat small protein [Rattus norvegicus]                                                                                                | <a href="#">14</a> | 5.6 | 25.39 | <input type="checkbox"/> |
| 4    | 3.0×10 <sup>-4</sup>  | <a href="#">gi 11693154 ref NP_071782.1 </a> platelet-activating factor acetylhydrolase alpha 2 subunit [Rattus norvegicus]                                                                 | <a href="#">13</a> | 5.6 | 25.73 | <input type="checkbox"/> |
| 5    | 3.3×10 <sup>-4</sup>  | <a href="#">gi 27682181 ref XP_219746.1 </a> PREDICTED: similar to Three prime repair exonuclease 2 (3-5 exonuclease TREX2) [Rattus norvegicus]                                             | <a href="#">14</a> | 5.2 | 26.45 | <input type="checkbox"/> |
| 6    | 3.6×10 <sup>-4</sup>  | <a href="#">gi 1943431 pdb 6GSU A</a> Chain A, First-Sphere And Second-Sphere Electrostatic Effects In The Active Site Of A Class Mu Glutathione Transferase                                | <a href="#">12</a> | 8.6 | 25.91 | <input type="checkbox"/> |
| 7    | 8.1×10 <sup>-4</sup>  | <a href="#">gi 34866849 ref XP_216949.2 </a> PREDICTED: similar to Exosome complex exonuclease RRP41 (Ribosomal RNA-processing protein 41) (Exosome component 4) (p12A) [Rattus norvegicus] | <a href="#">11</a> | 5.7 | 26.66 | <input type="checkbox"/> |
| 8    | 2.3×10 <sup>-3</sup>  | <a href="#">gi 286206 dbj BAA03318.1 </a> calcineurin B [Rattus sp.]                                                                                                                        | <a href="#">12</a> | 5.0 | 25.08 | <input type="checkbox"/> |
| 9    | 3.4×10 <sup>-3</sup>  | <a href="#">gi 19424180 ref NP_598212.1 </a> preimplantation protein 3 [Rattus norvegicus]                                                                                                  | <a href="#">14</a> | 5.5 | 26.53 | <input type="checkbox"/> |
| 10   | 8.6×10 <sup>-3</sup>  | <a href="#">gi 34880612 ref XP_228900.2 </a> PREDICTED: similar to myosin light chain 1 slow a [Rattus norvegicus]                                                                          | <a href="#">16</a> | 5.8 | 27.67 | <input type="checkbox"/> |
| 11   | 0.025                 | <a href="#">gi 25453412 ref NP_620430.1 </a> glutathione S-transferase, pi 2 [Rattus norvegicus]                                                                                            | <a href="#">22</a> | 6.9 | 23.65 | <input type="checkbox"/> |
| 12   | 0.67                  | <a href="#">gi 16758972 ref NP_446050.1 </a> nudix-type motif 4 [Rattus norvegicus]                                                                                                         | <a href="#">21</a> | 6.0 | 20.35 | <input type="checkbox"/> |

### NOTE:

1. To search again using [unmatched masses](#), click the symbol .
2. Highly similar protein sequences were given the same rank (click "+" to expand/contract).

### Input Summary

Search id A8F8B288-112C-592D1F75

Sequences 20076

Date & Time Tue Feb 20 18:22:04 2007 UTC (Search Time: 0.39 sec.)

**Sample ID** 20040813 richardson NIA set 1 spot 2201 CONSENSUS search

**Database** NCBIInr [..\databases\nr]

**Taxonomy** Rattus

**Mass Range** 20 - 28 kDa

**pI Range** 5.0 -9.0

**Digestion** Trypsin

**Missed Cuts** 0

**Modifications** +C2H3ON@C(Complete);

**Charge State** MH+

**Masses (avg)**

**Tolerance (avg)** 1.00 ppm

**Masses (mon)** 704.671 706.404 710.412 718.895 719.400 725.490 728.463 732.388 737.383  
742.467 743.439 749.372 751.454 754.406 763.464 764.412 766.421 772.446  
774.447 780.654 781.405 787.489 794.448 796.497 802.448 814.495 815.474  
821.400 823.464 829.709 830.523 831.512 837.418 840.495 849.430 855.498  
856.501 859.496 866.490 877.473 881.483 884.521 891.476 903.445 904.456  
906.460 917.470 920.487 923.531 932.486 938.493 941.505 944.500 947.438  
954.574 955.489 962.467 964.472 970.561 979.510 986.575 987.611 994.515  
995.619 1001.720 1002.572 1003.574 1005.493 1011.603 1015.609 1019.493  
1021.492 1031.493 1035.473 1037.487 1043.781 1044.520 1051.490 1057.301  
1058.549 1063.458 1069.588 1070.557 1075.582 1082.544 1085.579 1087.486  
1093.530 1099.613 1100.550 1103.610 1109.967 1110.595 1116.522 1124.518  
1131.592 1137.621 1138.552 1141.892 1147.811 1148.586 1149.613 1163.618  
1172.611 1174.639 1177.616 1187.590 1189.376 1209.629 1216.614 1224.655  
1227.671 1234.660 1242.666 1243.638 1253.650 1254.675 1257.680 1260.665  
1263.678 1271.657 1285.711 1286.676 1293.856 1294.703 1296.690 1299.697  
1302.731 1309.688 1316.712 1327.676 1328.730 1336.667 1348.702 1356.697  
1373.682 1381.701 1391.727 1398.741 1401.714 1406.682 1414.721 1415.760  
1418.750 1425.705 1426.722 1433.773 1441.736 1445.751 1447.774 1461.740  
1469.781 1471.769 1482.764 1500.807 1504.774 1515.735 1516.784 1519.747  
1528.814 1536.747 1544.780 1555.833 1563.809 1569.751 1577.763 1585.796  
1589.766 1596.940 1597.774 1605.804 1607.827 1616.856 1619.673 1627.866  
1628.871 1637.822 1646.853 1649.833 1652.924 1655.772 1664.275 1664.797  
1673.103 1673.847 1681.817 1689.778 1698.840 1700.895 1709.791 1724.802  
1725.809 1731.884 1735.753 1744.375 1745.810 1753.893 1761.825 1773.914  
1782.858 1791.369 1791.910 1797.929 1805.990 1811.947 1819.981 1828.810  
1830.020 1832.988 1841.358 1841.964 1846.996 1854.963 1857.951 1861.000  
1868.968 1874.970 1883.873 1888.992 1897.899 1901.979 1910.888 1912.920  
1915.866 1919.080 1927.970 1937.028 1941.951 1944.950 1949.942 1958.784  
1960.871 1964.988 1967.945 1977.936 1981.981 1990.024 2003.083 2007.034  
2016.125 2021.057 2024.026 2032.032 2033.976 2043.128 2045.047 2050.990  
2053.949 2063.055 2065.931 2076.045 2079.146 2090.124 2093.111 2103.107  
2107.093 2118.082 2119.943 2126.988 2138.060 2142.048 2150.067 2160.823



|          |          |          |          |          |          |          |          |
|----------|----------|----------|----------|----------|----------|----------|----------|
| 2170.007 | 2183.110 | 2192.152 | 2195.086 | 2204.025 | 2208.043 | 2220.181 | 2223.071 |
| 2232.195 | 2234.104 | 2237.161 | 2246.251 | 2258.142 | 2265.125 | 2274.078 | 2279.156 |
| 2282.115 | 2291.522 | 2294.102 | 2311.039 | 2314.149 | 2323.231 | 2327.226 | 2353.132 |
| 2364.190 | 2366.221 | 2377.145 | 2385.001 | 2397.156 | 2399.069 | 2409.177 | 2418.377 |
| 2424.145 | 2436.100 | 2440.358 | 2446.118 | 2456.124 | 2470.133 | 2481.161 | 2487.239 |
| 2501.403 | 2510.239 | 2521.795 | 2524.300 | 2534.973 | 2540.199 | 2546.553 | 2550.192 |
| 2560.374 | 2565.183 | 2568.426 | 2573.174 | 2590.359 | 2596.259 | 2621.242 | 2630.079 |
| 2641.217 | 2653.454 | 2664.293 | 2667.389 | 2679.163 | 2691.313 | 2695.369 | 2705.242 |
| 2717.345 | 2723.319 | 2735.393 | 2742.198 | 2746.222 | 2759.230 | 2763.337 | 2773.370 |
| 2780.400 | 2784.238 | 2795.306 | 2805.753 | 2809.395 | 2822.445 | 2826.348 | 2831.401 |
| 2841.377 | 2852.449 | 2859.147 | 2868.522 | 2878.454 | 2884.567 | 2889.346 | 2902.217 |
| 2904.432 | 2915.445 | 2927.573 | 2937.352 | 2943.307 | 2948.646 | 2951.574 | 2956.774 |
| 2966.859 | 2970.346 | 2980.491 | 2992.347 | 2995.998 | 3003.637 | 3009.364 | 3019.093 |
| 3020.129 | 3025.612 | 3035.924 | 3039.601 | 3054.032 | 3065.624 | 3078.172 | 3082.584 |
| 3088.760 | 3097.455 | 3111.984 | 3117.662 | 3142.506 | 3146.322 | 3157.481 | 3161.647 |
| 3171.126 | 3177.580 | 3187.844 | 3199.343 | 3204.719 | 3211.360 | 3218.657 | 3230.288 |
| 3242.708 | 3257.728 | 3262.190 | 3265.809 | 3277.410 | 3288.953 | 3292.819 | 3304.854 |
| 3315.709 | 3321.065 | 3324.910 | 3336.654 | 3354.854 | 3367.667 | 3380.817 | 3405.976 |
| 3410.499 | 3429.018 | 3446.281 | 3450.989 | 3466.085 | 3478.591 | 3483.998 | 3493.190 |
| 3506.104 | 3519.480 | 3530.320 | 3541.377 | 3552.853 | 3558.236 | 3561.894 | 3574.933 |
| 3578.559 | 3593.164 | 3614.517 | 3627.165 | 3646.909 | 3660.632 | 3674.177 | 3680.672 |
| 3690.692 |          |          |          |          |          |          |          |

**Tolerance (mon)** 19.00 ppm

**Number of Peptides** 432

# Laboratory of Mass Spectrometry and Gaseous Ion Chemistry

## PROWL

- ▶ **ProFound**
- ▶ **ProteinInfo**
- ▶ **PeptideMap**
- ▶ **PepFrag**
- ▶ **X! Tandem**
- ▶ **X! Hunter**
- ▶ **GPMDDB**
- ▶ **PROWL Home**
- ▶ **Chait Lab**



The Rockefeller University  
1230 York Avenue,  
New York, NY 10021  
(212) 327-8000



**National Center for  
Research Resources**

National Resource  
for the Mass Spectrometric  
Analysis of Biological  
Macromolecules

## ProFound



### Protein Candidates

| Rank | Expectation            | Protein Information and Sequence Analyse Tools (T)                                                                                           | %  | pI  | kDa   | R |
|------|------------------------|----------------------------------------------------------------------------------------------------------------------------------------------|----|-----|-------|---|
| 1    | 5.3 × 10 <sup>-4</sup> | gi 205595 gb AAA41657.1  myosin heavy chain                                                                                                  | 41 | 5.2 | 44.90 | ● |
| +2   | 1.0 × 10 <sup>-3</sup> | gi 2507388 sp P09006 CPI6_RAT Contrapsin-like protease inhibitor 6 precursor (CPI-26) (Serine protease inhibitor 3) (SPI-3) (SPI-2.2)        | 38 | 5.3 | 46.81 | ● |
|      |                        | gi 13928716 ref NP_113719.1  serine protease inhibitor 2c [Rattus norvegicus]                                                                | 43 | 5.4 | 45.65 | ● |
| -    | -                      | gi 3169626 gb AAC17905.1  7acomp protein [Rattus sp.]                                                                                        | 28 | 5.9 | 48.21 | ● |
| -    | -                      | gi 38454312 ref NP_942084.1  basic leucine zipper and W2 domains 1 [Rattus norvegicus]                                                       | 32 | 5.7 | 48.20 | ● |
| -    | -                      | gi 57012388 ref NP_001008815.1  type II keratin Kb20 [Rattus norvegicus]                                                                     | 28 | 5.9 | 51.05 | ● |
| -    | -                      | gi 16758790 ref NP_446362.1  pleckstrin homology, Sec7 and coiled/coil domains 1 [Rattus norvegicus]                                         | 27 | 5.5 | 46.71 | ● |
| -    | -                      | gi 38181888 gb AAH61542.1  Proteasome (prosome, macropain) 26S subunit, ATPase 2 [Rattus norvegicus]                                         | 33 | 5.7 | 49.00 | ● |
| -    | -                      | gi 15100181 ref NP_150239.1  proteasome (prosome, macropain) 26S subunit, ATPase 2 [Rattus norvegicus]                                       | 33 | 5.6 | 48.96 | ● |
| -    | -                      | gi 19173736 ref NP_596874.1  serine carboxypeptidase 1 [Rattus norvegicus]                                                                   | 27 | 5.4 | 51.44 | ● |
| -    | -                      | gi 56605766 ref NP_001008345.1  eukaryotic translation termination factor 1 [Rattus norvegicus]                                              | 40 | 5.5 | 49.24 | ● |
| -    | -                      | gi 37788073 gb AAO65547.1  brain and heart protein NDRG4-C2 [Rattus norvegicus]                                                              | 27 | 5.5 | 43.30 | ● |
| -    | -                      | gi 18202478 sp P97738 NPTX2_RAT Neuronal pentraxin-2 precursor (NP2) (Neuronal pentraxin II) (NP-II) (Neuronal activity-regulated pentraxin) | 15 | 5.5 | 47.81 | ● |

## NOTE:

1. To search again using **unmatched masses**, click the symbol .
2. Highly similar protein sequences were given the same rank (click "+" to expand/contract).

**Input Summary****Search id** A32811EF-1720-5339195E**Sequences** 20092**Date & Time** Wed Jan 24 22:00:17 2007 UTC (Search Time: 0.53 sec.)**Sample ID****Database** NCBI nr [..\databases\nr]**Taxonomy** Rattus**Mass Range** 42 - 52 kDa**pI Range** 5.0 -6.0**Digestion** Trypsin**Missed Cuts** 1**Modifications** +C2H3ON@C(Complete); +O@M(Partial); +HPO3@STY(Partial);**Charge State** MH+**Masses (avg)****Tolerance (avg)** 1.00 ppm

**Masses (mon)** 706.396 711.373 712.324 714.299 719.322 722.391 726.445  
731.310 734.459 739.296 741.382 743.397 748.392 752.408  
754.420 763.349 765.412 771.433 774.406 778.472 784.431  
786.410 791.302 792.476 798.507 804.333 811.425 817.432  
819.414 822.401 825.451 831.471 833.431 836.852 840.494  
849.428 854.513 857.484 864.490 878.509 884.500 885.500  
890.471 892.499 898.518 904.435 905.447 907.533 916.451  
921.508 932.629 939.420 945.471 946.526 952.517 955.509  
961.507 964.576 968.529 974.420 977.447 983.556 989.536  
991.462 994.557 997.572 1003.424 1004.554 1010.555  
1011.603 1017.818 1018.376 1023.600 1034.499 1038.484  
1044.520 1051.512 1055.530 1061.550 1067.565 1079.668  
1081.504 1088.551 1091.528 1097.694 1098.608 1100.594  
1102.582 1109.586 1113.624 1120.010 1120.551 1123.571  
1132.566 1140.573 1146.672 1148.541 1154.547 1159.582  
1166.581 1173.625 1180.644 1185.551 1192.651 1198.678

|          |          |          |          |          |          |
|----------|----------|----------|----------|----------|----------|
| 1205.701 | 1206.613 | 1210.566 | 1218.047 | 1218.657 | 1220.632 |
| 1227.554 | 1228.592 | 1230.550 | 1237.524 | 1244.494 | 1246.584 |
| 1254.032 | 1254.557 | 1262.626 | 1267.558 | 1274.684 | 1282.650 |
| 1291.462 | 1294.560 | 1298.729 | 1303.730 | 1310.689 | 1313.639 |
| 1326.648 | 1334.480 | 1335.709 | 1341.669 | 1348.605 | 1349.792 |
| 1352.687 | 1355.684 | 1360.769 | 1362.656 | 1369.871 | 1372.289 |
| 1375.756 | 1384.709 | 1391.731 | 1399.677 | 1401.742 | 1408.807 |
| 1411.714 | 1418.602 | 1425.785 | 1435.256 | 1436.659 | 1443.837 |
| 1444.553 | 1451.366 | 1454.702 | 1462.801 | 1466.768 | 1470.870 |
| 1477.693 | 1484.688 | 1485.752 | 1492.740 | 1497.790 | 1506.138 |
| 1506.765 | 1515.689 | 1523.850 | 1531.797 | 1534.432 | 1538.813 |
| 1545.687 | 1552.788 | 1554.858 | 1558.709 | 1565.786 | 1569.785 |
| 1576.834 | 1584.784 | 1591.867 | 1592.834 | 1599.747 | 1602.818 |
| 1609.915 | 1612.563 | 1616.810 | 1624.806 | 1628.852 | 1633.801 |
| 1642.711 | 1651.236 | 1651.838 | 1657.616 | 1665.932 | 1667.307 |
| 1669.754 | 1673.773 | 1677.769 | 1684.754 | 1692.860 | 1701.070 |
| 1703.820 | 1711.917 | 1713.756 | 1724.644 | 1725.762 | 1730.801 |
| 1738.793 | 1742.782 | 1751.647 | 1754.805 | 1757.852 | 1766.162 |
| 1766.784 | 1770.862 | 1773.895 | 1781.958 | 1782.754 | 1790.695 |
| 1791.891 | 1800.167 | 1801.824 | 1809.635 | 1812.845 | 1820.823 |
| 1827.726 | 1836.574 | 1846.745 | 1848.540 | 1854.219 | 1858.309 |
| 1865.021 | 1875.854 | 1884.847 | 1894.917 | 1904.045 | 1912.899 |
| 1916.789 | 1922.956 | 1931.203 | 1937.867 | 1946.741 | 1954.235 |
| 1963.444 | 1964.967 | 1974.890 | 1983.878 | 1986.788 | 1991.504 |
| 1999.747 | 2002.669 | 2009.697 | 2018.855 | 2023.941 | 2031.978 |
| 2036.230 | 2044.991 | 2054.962 | 2058.780 | 2067.008 | 2069.948 |
| 2089.820 | 2096.568 | 2101.042 | 2104.995 | 2112.851 | 2122.023 |
| 2133.083 | 2134.918 | 2144.638 | 2150.068 | 2151.973 | 2161.169 |
| 2162.985 | 2170.132 | 2174.967 | 2184.998 | 2188.431 | 2192.245 |
| 2196.063 | 2206.711 | 2220.178 | 2224.179 | 2233.082 | 2242.608 |
| 2252.219 | 2254.169 | 2260.249 | 2269.192 | 2271.085 | 2280.821 |
| 2284.232 | 2295.771 | 2308.471 | 2313.231 | 2317.120 | 2321.272 |
| 2330.692 | 2339.676 | 2343.229 | 2353.085 | 2362.996 | 2367.320 |
| 2376.177 | 2386.662 | 2390.151 | 2398.985 | 2408.132 | 2416.204 |
| 2422.068 | 2431.194 | 2435.712 | 2445.029 | 2446.795 | 2451.162 |
| 2460.775 | 2468.500 | 2480.496 | 2488.117 | 2498.174 | 2504.137 |
| 2511.153 | 2519.768 | 2528.940 | 2531.108 | 2541.217 | 2555.227 |
| 2565.248 | 2568.763 | 2573.477 | 2577.237 | 2585.143 | 2596.012 |
| 2606.353 | 2615.302 | 2620.265 | 2630.137 | 2646.122 | 2651.080 |



|          |          |          |          |          |          |
|----------|----------|----------|----------|----------|----------|
| 2661.079 | 2668.486 | 2674.544 | 2685.076 | 2689.965 | 2693.635 |
| 2697.622 | 2708.375 | 2718.762 | 2722.627 | 2725.229 | 2729.204 |
| 2743.794 | 2757.432 | 2767.310 | 2779.550 | 2795.485 | 2806.288 |
| 2818.435 | 2829.210 | 2838.858 | 2848.666 | 2853.090 | 2860.472 |
| 2870.678 | 2885.641 | 2892.883 | 2905.834 | 2910.558 | 2921.253 |
| 2927.155 | 2931.494 | 2942.082 | 2944.275 | 2955.875 | 2965.368 |
| 2969.149 | 2974.254 | 2986.943 | 2999.291 | 3012.736 | 3018.212 |
| 3026.286 | 3037.341 | 3041.910 | 3054.147 | 3068.387 | 3079.219 |
| 3084.568 | 3096.253 | 3100.079 | 3111.117 | 3122.815 | 3128.314 |
| 3136.233 | 3142.575 | 3149.604 | 3161.601 | 3164.367 | 3170.510 |
| 3182.814 | 3188.518 | 3200.589 | 3219.370 | 3230.542 | 3238.857 |
| 3250.870 | 3255.059 | 3260.981 | 3272.380 | 3283.450 | 3287.351 |
| 3294.656 | 3305.649 | 3316.621 | 3321.744 | 3334.104 | 3339.709 |
| 3343.564 | 3356.902 | 3363.698 | 3371.557 | 3383.578 | 3388.792 |
| 3398.487 | 3407.291 | 3416.461 | 3428.996 | 3440.289 | 3445.231 |
| 3457.224 | 3468.841 | 3472.533 | 3476.504 | 3489.070 | 3496.396 |
| 3509.915 | 3515.466 | 3530.462 | 3541.640 | 3544.769 | 3559.224 |
| 3564.613 | 3581.166 | 3587.176 | 3599.090 | 3602.486 | 3616.776 |
| 3624.114 | 3638.040 | 3656.106 | 3675.441 | 3683.043 | 3695.976 |

**Tolerance** 21.00 ppm  
**(mon)**

**Number of** 453  
**Peptides**

# Laboratory of Mass Spectrometry and Gaseous Ion Chemistry

## PROWL

- ▶ **ProFound**
- ▶ **ProteinInfo**
- ▶ **PeptideMap**
- ▶ **PepFrag**
- ▶ **X! Tandem**
- ▶ **X! Hunter**
- ▶ **GPMDDB**
- ▶ **PROWL Home**
- ▶ **Chait Lab**

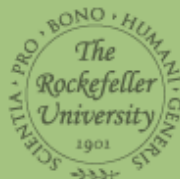

The Rockefeller University  
1230 York Avenue,  
New York, NY 10021  
(212) 327-8000



**National Center for  
Research Resources**

National Resource  
for the Mass Spectrometric  
Analysis of Biological  
Macromolecules

## ProFound



### Protein Candidates

| Rank | Expectation         | Protein Information and Sequence Analyse Tools (T)                                                            | %  | pI  | kDa   | R |
|------|---------------------|---------------------------------------------------------------------------------------------------------------|----|-----|-------|---|
| 1    | 2.770 <sup>-6</sup> | gi 23463271 ref NP_695209.1  COP9 (constitutive photomorphogenic) homolog, subunit 2 [Rattus norvegicus]      | 53 | 5.4 | 51.86 | ● |
| 2    | 5.070 <sup>-5</sup> | gi 25742837 ref NP_446009.1  protein arginine N-methyltransferase 3 [Rattus norvegicus]                       | 53 | 5.0 | 60.09 | ● |
| 3    | 2.570 <sup>-4</sup> | gi 37784494 gb AAO60218.1  MTSG1 346aa isoform [Rattus norvegicus]                                            | 50 | 5.8 | 40.19 | ● |
| 4    | 3.370 <sup>-4</sup> | gi 5802541 gb AAD51699.1  calpain isoform Rt88' [Rattus norvegicus]                                           | 51 | 5.5 | 57.31 | ● |
| 5    | 4.270 <sup>-4</sup> | gi 44921592 gb AAS49162.1  SCI-related protein [Rattus norvegicus]                                            | 47 | 5.3 | 57.65 | ● |
| 6    | 6.770 <sup>-4</sup> | gi 23618920 ref NP_112339.1  PCTAIRE protein kinase 1 isoform b [Rattus norvegicus]                           | 51 | 6.3 | 52.85 | ● |
| 7    | 7.370 <sup>-4</sup> | gi 13027473 ref NP_076491.1  MRS2-like, magnesium homeostasis factor [Rattus norvegicus]                      | 48 | 6.1 | 49.63 | ● |
| 8    | 1.470 <sup>-3</sup> | gi 56905 emb CAA30916.1  unnamed protein product [Rattus norvegicus]                                          | 40 | 6.4 | 57.06 | ● |
| 9    | 1.770 <sup>-3</sup> | gi 6714522 dbj BAA89475.1  dihydropyrimidinase-related protein [Rattus norvegicus]                            | 46 | 6.5 | 61.89 | ● |
| 10   | 2.170 <sup>-3</sup> | gi 56119147 ref NP_001007798.1  arrestin domain containing 3 [Rattus norvegicus]                              | 41 | 6.0 | 46.85 | ● |
| 11   | 2.270 <sup>-3</sup> | gi 27692054 ref XP_227318.1  PREDICTED: similar to tigger transposable element derived 4 [Rattus norvegicus]  | 43 | 5.7 | 58.06 | ● |
| 12   | 3.970 <sup>-3</sup> | gi 17902245 gb AAL47844.1 AF450298_1 EZRIN [Rattus norvegicus]                                                | 43 | 6.2 | 54.27 | ● |
| 13   | 4.470 <sup>-3</sup> | gi 13242285 ref NP_077358.1  serine (or cysteine) proteinase inhibitor, clade D, member 1 [Rattus norvegicus] | 47 | 6.5 | 54.76 | ● |



|     |                     |                                                                                                                                                                                                              |    |     |       |   |
|-----|---------------------|--------------------------------------------------------------------------------------------------------------------------------------------------------------------------------------------------------------|----|-----|-------|---|
| 14  | 4.6?0 <sup>-3</sup> | <a href="#">gi 51890219 ref NP_001004078.1 </a> chaperonin containing TCP1, subunit 5 (epsilon) [Rattus norvegicus]                                                                                          | 40 | 5.5 | 59.98 | 🔴 |
| 15  | 4.8?0 <sup>-3</sup> | <a href="#">gi 51854223 ref NP_001004077.1 </a> glucokinase activity, related sequence 2 [Rattus norvegicus]                                                                                                 | 38 | 5.1 | 61.97 | 🔴 |
| 16  | 4.9?0 <sup>-3</sup> | <a href="#">gi 20302020 ref NP_620217.1 </a> spermatogenesis-associated protein 7 [Rattus norvegicus]                                                                                                        | 46 | 5.8 | 60.36 | 🔴 |
| +17 | 5.9?0 <sup>-3</sup> | <a href="#">gi 123513 sp P06866 HPT_RAT</a> Haptoglobin precursor [Contains: Haptoglobin alpha chain; Haptoglobin beta chain]                                                                                | 46 | 6.1 | 39.04 | 🔴 |
|     | -                   | <a href="#">gi 33086640 gb AAP92632.1 </a> Ba1-647 [Rattus norvegicus]                                                                                                                                       | 39 | 6.1 | 43.08 | 🔴 |
|     | -                   | <a href="#">gi 204655 gb AAA41348.1 </a> haptoglobin (Hp)                                                                                                                                                    | 42 | 6.3 | 39.11 | 🔴 |
| 18  | 6.6?0 <sup>-3</sup> | <a href="#">gi 51948518 ref NP_001004275.1 </a> COP9 signalosome subunit 4 [Rattus norvegicus]                                                                                                               | 50 | 5.6 | 46.56 | 🔴 |
| 19  | 8.9?0 <sup>-3</sup> | <a href="#">gi 34879586 ref XP_225769.2 </a> PREDICTED: similar to glycerol kinase-like 1 [Rattus norvegicus]                                                                                                | 40 | 5.3 | 61.09 | 🔴 |
| +20 | 0.012               | <a href="#">gi 34098962 ref NP_036753.3 </a> 6-phosphofructo-2-kinase/fructose-2,6-biphosphatase 1 [Rattus norvegicus]                                                                                       | 44 | 6.3 | 55.38 | 🔴 |
|     | -                   | <a href="#">gi 119751 sp P07953 F261_RAT</a> 6-phosphofructo-2-kinase/fructose-2,6-biphosphatase 1 (6PF-2-K/Fru-2,6-P2ASE liver isozyme) [Includes: 6-phosphofructo-2-kinase ; Fructose-2,6-bisphosphatase ] | 44 | 6.3 | 55.32 | 🔴 |
|     | -                   | <a href="#">gi 56922 emb CAA33606.1 </a> unnamed protein product [Rattus norvegicus]                                                                                                                         | 41 | 6.0 | 52.62 | 🔴 |
|     | -                   | <a href="#">gi 7434494 pir  S77704</a> 6-phosphofructo-2-kinase (EC 2.7.1.105) / fructose-2, 6-bisphosphate 2-phosphatase (EC 3.1.3.46) clone 5c, skeletal muscle - rat                                      | 42 | 6.4 | 54.83 | 🔴 |
|     | -                   | <a href="#">gi 55824719 gb AAH86510.1 </a> Snx25 protein [Rattus norvegicus]                                                                                                                                 | 37 | 5.5 | 61.42 | 🔴 |
|     | -                   | <a href="#">gi 16758148 ref NP_445863.1 </a> sorting nexin 1 [Rattus norvegicus]                                                                                                                             | 36 | 5.2 | 59.14 | 🔴 |
|     | -                   | <a href="#">gi 27715247 ref XP_233266.1 </a> PREDICTED: hypothetical protein [Rattus norvegicus]                                                                                                             | 36 | 5.1 | 63.96 | 🔴 |
|     | -                   | <a href="#">gi 21426787 ref NP_653355.1 </a> calcium activated nucleotidase 1 [Rattus norvegicus]                                                                                                            | 47 | 6.2 | 45.70 | 🔴 |

|   |                                                                                                                                           |    |     |       |  |
|---|-------------------------------------------------------------------------------------------------------------------------------------------|----|-----|-------|--|
| - | <a href="#">gi 54035324 gb AAH83853.1</a> Crystallin, zeta (quinone reductase)-like 1 [Rattus norvegicus]                                 | 44 | 5.6 | 39.05 |  |
| - | <a href="#">gi 56847624 ref NP_001008753.1</a> keratin complex 1, acidic, gene 23 [Rattus norvegicus]                                     | 39 | 5.7 | 48.26 |  |
| - | <a href="#">gi 13096481 pdb 1D4F A</a> Chain A, Crystal Structure Of Recombinant Rat-Liver D244e Mutant S- Adenosylhomocysteine Hydrolase | 46 | 6.1 | 47.92 |  |
| - | <a href="#">gi 51260613 gb AAH78681.1</a> Carboxylesterase-like [Rattus norvegicus]                                                       | 39 | 5.9 | 62.42 |  |
| - | <a href="#">gi 40786436 ref NP_955404.1</a> eukaryotic translation initiation factor 4A, isoform 1 [Rattus norvegicus]                    | 50 | 5.3 | 46.36 |  |
| - | <a href="#">gi 6981416 ref NP_036765.1</a> peripherin [Rattus norvegicus]                                                                 | 45 | 5.4 | 53.65 |  |
| - | <a href="#">gi 54673768 gb AAH85123.1</a> RGD1309107 protein [Rattus norvegicus]                                                          | 41 | 6.4 | 57.97 |  |
| - | <a href="#">gi 50401219 sp P62603 TRI26_RAT</a> Tripartite motif-containing protein 26 (Zinc finger protein 173)                          | 43 | 5.0 | 63.53 |  |
| - | <a href="#">gi 57012378 ref NP_001008810.1</a> type II keratin Kb26 [Rattus norvegicus]                                                   | 50 | 6.0 | 58.52 |  |
| - | <a href="#">gi 585364 sp P37285 KLC1_RAT</a> Kinesin light chain 1 (KLC 1)                                                                | 41 | 5.8 | 63.69 |  |
| - | <a href="#">gi 9506963 ref NP_062245.1</a> protein phosphatase 2C, magnesium-dependent, catalytic subunit [Rattus norvegicus]             | 38 | 6.3 | 61.76 |  |
| - | <a href="#">gi 6981396 ref NP_037313.1</a> protein kinase, cAMP dependent regulatory, type I, alpha [Rattus norvegicus]                   | 43 | 5.3 | 43.31 |  |
| - | <a href="#">gi 34865922 ref XP_236627.2</a> PREDICTED: similar to MON1 homolog A [Rattus norvegicus]                                      | 25 | 5.8 | 62.48 |  |
| - | <a href="#">gi 4139571 pdb 1B3R A</a> Chain A, Rat Liver S- Adenosylhomocystein Hydrolase                                                 | 39 | 6.1 | 47.90 |  |
| - | <a href="#">gi 8392878 ref NP_058897.1</a> S-adenosylhomocysteine hydrolase [Rattus norvegicus]                                           | 39 | 6.1 | 48.03 |  |
| - | <a href="#">gi 58000421 ref NP_001009972.1</a> gametogenetin-binding protein 1 [Rattus norvegicus]                                        | 43 | 5.8 | 41.24 |  |

|   |                                                                                                                                                                                                                                |    |     |       |                                                                                       |
|---|--------------------------------------------------------------------------------------------------------------------------------------------------------------------------------------------------------------------------------|----|-----|-------|---------------------------------------------------------------------------------------|
| - | <a href="#">gi 34878802 ref XP_226031.2 </a> PREDICTED: similar to Transcription initiation factor TFIID subunit 7 (Transcription initiation factor TFIID 55 kDa subunit) (TAF(II)55) (TAFII-55) (TAFII55) [Rattus norvegicus] | 38 | 5.2 | 39.16 |    |
| - | <a href="#">gi 50925859 gb AAH79304.1 </a> Tektin 4 [Rattus norvegicus]                                                                                                                                                        | 49 | 5.8 | 52.76 |    |
| - | <a href="#">gi 34536836 ref NP_620245.2 </a> EH-domain containing 3 [Rattus norvegicus]                                                                                                                                        | 39 | 6.0 | 60.83 |    |
| - | <a href="#">gi 38511542 gb AAH61802.1 </a> Fibp protein [Rattus norvegicus]                                                                                                                                                    | 42 | 6.3 | 41.50 |    |
| - | <a href="#">gi 415898 emb CAA81642.1 </a> heat shock rotein 70 [Rattus rattus]                                                                                                                                                 | 55 | 5.6 | 50.50 |    |
| - | <a href="#">gi 57012336 ref NP_001008803.1 </a> type II keratin Kb22 [Rattus norvegicus]                                                                                                                                       | 39 | 5.5 | 55.72 |    |
| - | <a href="#">gi 16923972 ref NP_476464.1 </a> peptidase (prosome, macropain) 26S subunit, ATPase 1 [Rattus norvegicus]                                                                                                          | 45 | 5.9 | 49.34 |    |
| - | <a href="#">gi 55249675 gb AAH85725.1 </a> Capn10 protein [Rattus norvegicus]                                                                                                                                                  | 45 | 5.6 | 41.41 |    |
| - | <a href="#">gi 33086584 gb AAP92604.1 </a> Ab2-379 [Rattus norvegicus]                                                                                                                                                         | 37 | 5.2 | 62.34 |    |
| - | <a href="#">gi 18426834 ref NP_569095.1 </a> coronin, actin binding protein 1A [Rattus norvegicus]                                                                                                                             | 29 | 6.1 | 51.73 |    |
| - | <a href="#">gi 55562834 gb AAH86371.1 </a> Nedd4I protein [Rattus norvegicus]                                                                                                                                                  | 42 | 5.3 | 52.00 |    |
| - | <a href="#">gi 3676244 emb CAA09721.1 </a> DNA polymerase alpha subunit II [Rattus norvegicus]                                                                                                                                 | 34 | 5.8 | 55.50 |    |
| - | <a href="#">gi 46237572 emb CAE83952.1 </a> butyrophilin-like 5 [Rattus norvegicus]                                                                                                                                            | 43 | 5.4 | 45.67 |  |
| - | <a href="#">gi 50926983 gb AAH79135.1 </a> Similar to RIKEN cDNA 1810060J02 [Rattus norvegicus]                                                                                                                                | 35 | 5.0 | 50.32 |  |
| - | <a href="#">gi 20137191 sp Q91Y80 3BP5_RAT</a> SH3 domain-binding protein 5 (Vascular endothelial cell-specific protein 18)                                                                                                    | 34 | 5.3 | 47.35 |  |

## NOTE:

1. To search again using **unmatched masses**, click the symbol .
2. Highly similar protein sequences were given the same rank (click "+" to expand/contract).

**Input Summary****Search id** A3014387-1748-A3BE7A22**Sequences** 20092**Date & Time** Wed Jan 24 00:15:45 2007 UTC (Search Time: 0.61 sec.)**Sample ID****Database** NCBI nr [..\databases\nr]**Taxonomy** Rattus**Mass Range** 38 - 64 kDa**pI Range** 5.0 -6.5**Digestion** Trypsin**Missed Cuts** 1**Modifications** +C2H3ON@C(Complete); +O@M(Partial); +HPO3@ST(Partial);**Charge State** MH+**Masses (avg)****Tolerance (avg)** 1.00 ppm

|                     |          |          |          |          |          |          |         |
|---------------------|----------|----------|----------|----------|----------|----------|---------|
| <b>Masses (mon)</b> | 711.448  | 719.451  | 720.425  | 724.509  | 729.404  | 732.421  | 734.442 |
|                     | 740.486  | 743.416  | 748.448  | 751.468  | 754.420  | 764.481  | 765.448 |
|                     | 768.502  | 775.415  | 778.489  | 784.448  | 786.483  | 793.495  | 796.510 |
|                     | 798.503  | 804.462  | 814.449  | 819.466  | 822.472  | 824.498  | 830.708 |
|                     | 831.484  | 833.483  | 836.864  | 841.482  | 849.480  | 856.511  | 862.505 |
|                     | 864.482  | 879.496  | 882.550  | 888.515  | 891.484  | 903.513  | 905.476 |
|                     | 917.538  | 921.536  | 933.499  | 940.541  | 942.563  | 949.556  | 951.547 |
|                     | 955.514  | 962.555  | 963.516  | 968.596  | 979.576  | 988.904  | 989.560 |
|                     | 990.597  | 993.564  | 996.620  | 1003.576 | 1018.528 | 1020.547 |         |
|                     | 1023.623 | 1033.872 | 1034.521 | 1035.581 | 1038.528 | 1044.542 |         |
|                     | 1051.686 | 1057.847 | 1059.599 | 1066.618 | 1067.695 | 1074.565 |         |
|                     | 1078.671 | 1085.620 | 1088.593 | 1091.569 | 1098.627 | 1104.590 |         |
|                     | 1107.566 | 1113.867 | 1114.585 | 1125.574 | 1132.877 | 1133.579 |         |
|                     | 1134.599 | 1138.614 | 1141.499 | 1148.580 | 1153.648 | 1164.667 |         |
|                     | 1173.617 | 1187.627 | 1190.667 | 1201.675 | 1209.666 | 1211.656 |         |
|                     | 1218.599 | 1221.631 | 1226.670 | 1234.673 | 1241.705 | 1243.674 |         |
|                     | 1250.875 | 1251.613 | 1254.758 | 1262.039 | 1262.636 | 1263.689 |         |
|                     | 1270.708 | 1271.692 | 1285.697 | 1287.677 | 1294.738 | 1298.712 |         |
|                     | 1302.668 | 1308.699 | 1315.720 | 1317.698 | 1327.734 | 1332.643 |         |
|                     | 1348.710 | 1353.707 | 1372.742 | 1374.737 | 1382.734 | 1390.755 |         |

|          |          |          |          |          |          |
|----------|----------|----------|----------|----------|----------|
| 1391.759 | 1399.705 | 1407.724 | 1409.770 | 1411.717 | 1419.770 |
| 1423.780 | 1434.773 | 1441.767 | 1449.111 | 1449.752 | 1452.829 |
| 1463.754 | 1469.760 | 1483.780 | 1500.812 | 1501.777 | 1504.804 |
| 1514.953 | 1517.706 | 1522.771 | 1530.056 | 1530.793 | 1533.771 |
| 1541.849 | 1555.784 | 1559.769 | 1567.809 | 1569.782 | 1577.767 |
| 1581.754 | 1584.834 | 1592.777 | 1596.890 | 1599.824 | 1607.750 |
| 1609.829 | 1613.830 | 1618.891 | 1623.825 | 1631.810 | 1634.912 |
| 1647.048 | 1647.813 | 1655.858 | 1658.818 | 1666.944 | 1672.832 |
| 1681.158 | 1682.815 | 1685.827 | 1688.841 | 1698.872 | 1705.789 |
| 1716.176 | 1724.974 | 1725.896 | 1730.907 | 1733.850 | 1741.905 |
| 1742.917 | 1751.811 | 1754.884 | 1763.214 | 1773.946 | 1783.032 |
| 1786.901 | 1790.946 | 1799.904 | 1801.904 | 1809.916 | 1812.897 |
| 1821.939 | 1829.851 | 1831.897 | 1846.856 | 1849.027 | 1852.909 |
| 1861.905 | 1866.993 | 1876.053 | 1880.985 | 1889.904 | 1898.138 |
| 1900.016 | 1910.922 | 1917.050 | 1922.006 | 1930.991 | 1935.966 |
| 1939.998 | 1944.954 | 1954.023 | 1962.993 | 1968.935 | 1977.041 |
| 1978.928 | 1986.034 | 1991.981 | 1995.018 | 2000.014 | 2009.089 |
| 2016.008 | 2022.060 | 2025.059 | 2033.948 | 2041.062 | 2047.974 |
| 2057.066 | 2059.083 | 2063.945 | 2072.091 | 2075.035 | 2080.991 |
| 2091.018 | 2097.028 | 2107.032 | 2109.073 | 2112.074 | 2120.967 |
| 2127.081 | 2137.063 | 2146.195 | 2148.130 | 2151.190 | 2156.066 |
| 2166.273 | 2170.099 | 2182.132 | 2185.090 | 2192.116 | 2195.082 |
| 2203.072 | 2220.144 | 2223.033 | 2232.188 | 2235.180 | 2245.093 |
| 2257.172 | 2266.109 | 2276.251 | 2280.012 | 2283.133 | 2292.250 |
| 2296.185 | 2310.117 | 2321.201 | 2326.233 | 2354.155 | 2367.278 |
| 2381.094 | 2393.335 | 2399.039 | 2409.243 | 2420.297 | 2424.143 |
| 2435.197 | 2445.245 | 2448.344 | 2454.179 | 2464.266 | 2477.255 |
| 2493.237 | 2503.235 | 2508.326 | 2517.306 | 2521.363 | 2528.300 |
| 2538.402 | 2544.412 | 2559.109 | 2562.449 | 2567.224 | 2583.150 |
| 2595.316 | 2608.129 | 2618.181 | 2623.284 | 2633.262 | 2645.164 |
| 2651.229 | 2664.943 | 2668.177 | 2678.379 | 2691.185 | 2695.239 |
| 2706.123 | 2716.959 | 2720.049 | 2723.246 | 2734.115 | 2737.214 |
| 2748.253 | 2752.279 | 2763.135 | 2766.640 | 2773.268 | 2778.234 |
| 2788.110 | 2791.880 | 2797.256 | 2807.379 | 2811.340 | 2818.414 |
| 2825.532 | 2835.491 | 2838.252 | 2841.302 | 2855.136 | 2865.543 |
| 2869.365 | 2880.159 | 2890.394 | 2896.188 | 2904.274 | 2914.805 |
| 2918.441 | 2930.055 | 2934.028 | 2942.349 | 2949.145 | 2953.351 |
| 2963.237 | 2966.316 | 2978.207 | 2984.125 | 2988.282 | 3003.204 |
| 3013.542 | 3016.610 | 3023.527 | 3035.309 | 3051.387 | 3057.190 |



|          |          |          |          |          |          |
|----------|----------|----------|----------|----------|----------|
| 3068.141 | 3079.934 | 3082.923 | 3093.994 | 3098.451 | 3112.215 |
| 3116.083 | 3127.138 | 3139.004 | 3148.097 | 3159.132 | 3165.224 |
| 3176.857 | 3188.132 | 3199.197 | 3202.242 | 3215.736 | 3220.240 |
| 3238.133 | 3249.245 | 3253.541 | 3264.064 | 3275.182 | 3286.086 |
| 3292.259 | 3303.539 | 3306.981 | 3312.050 | 3319.448 | 3324.915 |
| 3336.133 | 3338.970 | 3349.861 | 3353.093 | 3364.045 | 3377.946 |
| 3380.878 | 3392.032 | 3394.774 | 3398.928 | 3410.700 | 3423.436 |
| 3438.481 | 3447.950 | 3476.116 | 3487.938 | 3509.887 | 3528.310 |
| 3537.658 | 3559.198 | 3563.369 | 3566.981 | 3587.198 | 3614.576 |
| 3625.774 | 3648.262 | 3663.942 | 3668.009 | 3674.521 | 3691.928 |
| 3698.338 |          |          |          |          |          |

**Tolerance** 48.00 ppm  
**(mon)**

**Number of** 423  
**Peptides**

# Laboratory of Mass Spectrometry and Gaseous Ion Chemistry

## PROWL

- **ProFound**
- **ProteinInfo**
- **PeptideMap**
- **PepFrag**
- **X! Tandem**
- **X! Hunter**
- **GPMDB**
- **PROWL Home**
- **Chait Lab**



The Rockefeller University  
1230 York Avenue,  
New York, NY 10021  
(212) 327-8000



**National Center for  
Research Resources**

National Resource  
for the Mass Spectrometric  
Analysis of Biological  
Macromolecules

## ProFound



### Protein Candidates

| Rank | Expectation           | Protein Information and Sequence Analyse Tools (T)                                                                                                      | %  | pI  | kDa   | R |
|------|-----------------------|---------------------------------------------------------------------------------------------------------------------------------------------------------|----|-----|-------|---|
| +1   | 4.2×10 <sup>-12</sup> | gi 205578 gb AAA41654.1  cardiac myosin heavy chain 5                                                                                                   | 41 | 5.5 | 47.89 | ● |
|      | -                     | gi 223466 prf  0807284A myosin H                                                                                                                        | 28 | 5.4 | 49.48 | ● |
|      | -                     | gi 205576 gb AAA41653.1  cardiac myosin heavy chain 21/26                                                                                               | 24 | 5.4 | 49.63 | ● |
| +2   | 1.8×10 <sup>-11</sup> | gi 204197 gb AAA41179.1  glucose-6-phosphate dehydrogenase                                                                                              | 42 | 6.2 | 55.32 | ● |
|      | -                     | gi 8393381 ref NP_058702.1  glucose-6-phosphate dehydrogenase [Rattus norvegicus]                                                                       | 38 | 6.0 | 59.81 | ● |
|      | -                     | gi 56605766 ref NP_001008345.1  eukaryotic translation termination factor 1 [Rattus norvegicus]                                                         | 42 | 5.5 | 49.24 | ● |
|      | -                     | gi 23463271 ref NP_695209.1  COP9 (constitutive photomorphogenic) homolog, subunit 2 [Rattus norvegicus]                                                | 36 | 5.4 | 51.86 | ● |
|      | -                     | gi 50927301 gb AAH78728.1  Spata7 protein [Rattus norvegicus]                                                                                           | 42 | 5.7 | 55.86 | ● |
|      | -                     | gi 16758204 ref NP_445912.1  protein interacting with C kinase 1 [Rattus norvegicus]                                                                    | 33 | 5.3 | 47.04 | ● |
|      | -                     | gi 49117334 gb AAH72689.1  Protein interacting with C kinase 1 [Rattus norvegicus]                                                                      | 33 | 5.3 | 47.14 | ● |
|      | -                     | gi 14150695 gb AAK54603.1 AF373289_1 protein kinase C-binding protein PICK1 [Rattus norvegicus]                                                         | 33 | 5.2 | 47.12 | ● |
|      | -                     | gi 7434494 pir  S77704 6-phosphofructo-2-kinase (EC 2.7.1.105) / fructose-2, 6-bisphosphate 2-phosphatase (EC 3.1.3.46) clone 5c, skeletal muscle - rat | 34 | 6.4 | 54.83 | ● |
|      | -                     | gi 27465585 ref NP_775151.1  keratin 20 [Rattus norvegicus]                                                                                             | 31 | 5.3 | 49.43 | ● |
|      | -                     | gi 57012388 ref NP_001008815.1  type II keratin Kb20 [Rattus norvegicus]                                                                                | 36 | 5.9 | 51.05 | ● |

|   |                                                                                                                                                                                               |    |     |       |   |
|---|-----------------------------------------------------------------------------------------------------------------------------------------------------------------------------------------------|----|-----|-------|---|
| - | gi 6978809 ref NP_036686.1  enolase 1, alpha [Rattus norvegicus]                                                                                                                              | 35 | 6.2 | 47.44 | 🔴 |
| - | gi 56605748 ref NP_001008336.1  eukaryotic translation initiation factor 4A2 [Rattus norvegicus]                                                                                              | 31 | 5.3 | 46.61 | 🔴 |
| - | gi 34880703 ref XP_234142.2  PREDICTED: similar to germ cell-less protein isoform 1 [Rattus norvegicus]                                                                                       | 24 | 5.5 | 58.92 | 🔴 |
| - | gi 36054040 ref NP_110468.2  neuronal pentraxin receptor [Rattus norvegicus]                                                                                                                  | 26 | 5.7 | 52.70 | 🔴 |
| - | gi 18202030 sp O35764 NPTXR_RAT Neuronal pentraxin receptor                                                                                                                                   | 26 | 5.8 | 52.81 | 🔴 |
| - | gi 24308510 ref NP_714957.1  neuronal pentraxin 1 [Rattus norvegicus]                                                                                                                         | 33 | 6.3 | 47.71 | 🔴 |
| - | gi 19924067 ref NP_612541.1  nucleoside-diphosphate kinase 7 [Rattus norvegicus]                                                                                                              | 38 | 6.3 | 45.09 | 🔴 |
| - | gi 20137191 sp Q91Y80 3BP5_RAT SH3 domain-binding protein 5 (Vascular endothelial cell-specific protein 18)                                                                                   | 27 | 5.3 | 47.35 | 🔴 |
| - | gi 34862267 ref XP_343156.1  PREDICTED: similar to Protein inhibitor of activated STAT protein 4 (Protein inhibitor of activated STAT protein gamma) (PIAS-gamma) (PIASy) [Rattus norvegicus] | 28 | 5.9 | 56.46 | 🔴 |
| - | gi 56757324 sp P04764 ENOA_RAT Alpha-enolase (2-phospho-D-glycerate hydro-lyase) (Non-neural enolase) (NNE) (Enolase 1)                                                                       | 30 | 6.2 | 47.45 | 🔴 |
| - | gi 38197558 gb AAH61764.1  Dnajc3 protein [Rattus norvegicus]                                                                                                                                 | 27 | 6.2 | 50.68 | 🔴 |
| - | gi 6981442 ref NP_036769.1  protein tyrosine phosphatase, non-receptor type 1 [Rattus norvegicus]                                                                                             | 40 | 5.8 | 50.28 | 🔴 |
| - | gi 37805418 gb AAH60314.1  Non-metastatic cells 7, protein expressed in [Rattus norvegicus]                                                                                                   | 37 | 6.3 | 45.06 | 🔴 |
| - | gi 92459 pir  JC1103 lens fiber cell beaded-filament protein CP94 - rat (fragment)                                                                                                            | 27 | 5.4 | 59.16 | 🔴 |
| - | gi 11560030 ref NP_071568.1  protein kinase inhibitor p58 [Rattus norvegicus]                                                                                                                 | 23 | 5.6 | 58.02 | 🔴 |



|   |                                                                                                                                           |    |     |       |   |
|---|-------------------------------------------------------------------------------------------------------------------------------------------|----|-----|-------|---|
| - | gi 56585031 gb AAH87631.1  TRNA splicing endonuclease 2 homolog (S. cerevisiae) [Rattus norvegicus]                                       | 33 | 5.8 | 53.39 | 🔴 |
| - | gi 32423788 gb AAP81281.1  EG3RVC [Rattus norvegicus]                                                                                     | 33 | 6.0 | 44.20 | 🔴 |
| - | gi 8393340 ref NP_058839.1  coagulation factor 10 [Rattus norvegicus]                                                                     | 22 | 5.3 | 55.62 | 🔴 |
| - | gi 50926203 gb AAH79267.1  Polymerase (DNA directed), delta 2, regulatory subunit [Rattus norvegicus]                                     | 26 | 5.3 | 51.96 | 🔴 |
| - | gi 40786436 ref NP_955404.1  eukaryotic translation initiation factor 4A, isoform 1 [Rattus norvegicus]                                   | 31 | 5.3 | 46.36 | 🔴 |
| - | gi 6137441 pdb 3BIF A Chain A, 6-Phosphofructo-2-KinaseFRUCTOSE-2,6-Bisphosphatase Empty 6-Pf-2k Active Site                              | 28 | 6.1 | 54.48 | 🔴 |
| - | gi 46485098 tpg DAA02218.1  TPA_exp: type II keratin Kb7 [Rattus norvegicus]                                                              | 27 | 5.7 | 50.69 | 🔴 |
| - | gi 2624499 pdb 1BIF  Chain , 6-Phosphofructo-2-KinaseFRUCTOSE-2,6-Bisphosphatase Bifunctional Enzyme Complexed With Atp-G-S And Phosphate | 28 | 6.1 | 54.61 | 🔴 |
| - | gi 111518 pir  A37180 chromogranin/secretogranin-like vesicle protein precursor - rat                                                     | 24 | 5.3 | 59.75 | 🔴 |
| - | gi 16758642 ref NP_446251.1  aspartyl-tRNA synthetase [Rattus norvegicus]                                                                 | 25 | 6.0 | 57.56 | 🔴 |
| - | gi 57164007 ref NP_001009176.1  tripartite motif-containing 10 [Rattus norvegicus]                                                        | 18 | 5.7 | 56.92 | 🔴 |
| - | gi 9506969 ref NP_062206.1  6-phosphofructo-2-kinase/fructose-2,6-biphosphatase 4 [Rattus norvegicus]                                     | 28 | 6.1 | 54.76 | 🔴 |
| - | gi 56325 emb CAA68545.1  unnamed protein product [Rattus norvegicus]                                                                      | 22 | 6.1 | 56.30 | 🔴 |
| - | gi 3169626 gb AAC17905.1  7acomp protein [Rattus sp.]                                                                                     | 24 | 5.9 | 48.21 | 🔴 |
| - | gi 51259385 gb AAH79183.1  Syntaxin 18 [Rattus norvegicus]                                                                                | 25 | 5.6 | 38.67 | 🔴 |
| - | gi 39645155 gb AAH63813.1  Gnn protein [Rattus norvegicus]                                                                                | 31 | 6.3 | 46.96 | 🔴 |
| - | gi 5802541 gb AAD51699.1  calpain isoform Rt88' [Rattus norvegicus]                                                                       | 33 | 5.5 | 57.31 | 🔴 |
| - | gi 55583763 sp Q6AYM2 TEKT2_RAT Tektin-2 (Testicular tektin) (Tektin-t)                                                                   | 30 | 5.8 | 50.73 | 🔴 |

|   |                                                                                                                                     |    |     |       |  |
|---|-------------------------------------------------------------------------------------------------------------------------------------|----|-----|-------|--|
| - | gi 6729954 pdb 2BIF A Chain A, 6-Phosphofructo-2-KinaseFRUCTOSE-2,6-Bisphosphatase H256a Mutant With F6p In Phosphatase Active Site | 26 | 6.0 | 54.54 |  |
| - | gi 23618920 ref NP_112339.1  PCTAIRE protein kinase 1 isoform b [Rattus norvegicus]                                                 | 28 | 6.3 | 52.85 |  |

## NOTE:

1. To search again using **unmatched masses**, click the symbol .
2. Highly similar protein sequences were given the same rank (click "+" to expand/contract).

**Input Summary****Search id** AD0D4342-0D3C-B07A137A**Sequences** 20092**Date & Time** Wed Jan 24 00:59:46 2007 UTC (Search Time: 0.56 sec.)**Sample ID****Database** NCBI nr [..\databases\nr]**Taxonomy** Rattus**Mass Range** 38 - 60 kDa**pI Range** 5.2 -6.6**Digestion** Trypsin**Missed Cuts** 1**Modifications** +C2H3ON@C(Complete); +O@M(Partial); +HPO3@STY(Partial);**Charge State** MH+**Masses (avg)****Tolerance (avg)** 1.00 ppm

**Masses (mon)** 707.395 712.250 717.409 723.418 724.395 726.369 731.415  
734.436 739.383 740.261 743.447 749.399 754.414 763.491  
764.420 768.423 774.436 778.484 780.436 786.931 787.459  
788.441 793.433 796.448 803.428 813.428 819.481 821.427  
824.513 830.375 832.430 836.860 840.483 848.437 854.482  
858.497 864.498 878.476 882.567 889.454 890.458 893.491  
902.500 904.522 906.506 916.497 919.493 922.534 932.490  
934.524 940.477 943.532 949.534 952.562 955.513 961.511  
963.514 968.532 980.607 986.493 992.588 994.560 997.575  
1003.554 1018.570 1021.578 1023.601 1029.528 1034.521

|          |          |          |          |          |          |
|----------|----------|----------|----------|----------|----------|
| 1038.550 | 1044.542 | 1051.664 | 1057.826 | 1058.548 | 1059.555 |
| 1065.564 | 1068.619 | 1078.650 | 1084.580 | 1088.616 | 1091.571 |
| 1097.336 | 1098.562 | 1104.591 | 1107.545 | 1113.621 | 1114.564 |
| 1124.515 | 1133.581 | 1136.574 | 1141.479 | 1148.560 | 1154.565 |
| 1160.586 | 1162.604 | 1172.905 | 1173.574 | 1176.595 | 1186.634 |
| 1200.629 | 1209.599 | 1212.620 | 1218.556 | 1225.614 | 1227.641 |
| 1234.653 | 1241.662 | 1249.619 | 1251.666 | 1254.691 | 1261.637 |
| 1263.694 | 1270.689 | 1273.641 | 1284.979 | 1285.678 | 1291.646 |
| 1298.645 | 1299.664 | 1307.634 | 1309.728 | 1311.702 | 1316.654 |
| 1327.667 | 1329.604 | 1337.691 | 1348.667 | 1351.659 | 1364.706 |
| 1372.824 | 1373.672 | 1380.916 | 1382.717 | 1389.658 | 1390.637 |
| 1399.612 | 1402.761 | 1410.714 | 1413.724 | 1417.725 | 1425.796 |
| 1426.787 | 1428.771 | 1435.802 | 1442.773 | 1449.736 | 1462.682 |
| 1465.695 | 1472.868 | 1473.747 | 1476.746 | 1479.748 | 1486.721 |
| 1487.734 | 1500.692 | 1501.787 | 1515.698 | 1516.720 | 1520.786 |
| 1524.779 | 1531.911 | 1533.782 | 1540.803 | 1554.787 | 1557.735 |
| 1560.765 | 1567.714 | 1569.767 | 1577.753 | 1579.759 | 1582.730 |
| 1586.777 | 1594.886 | 1597.737 | 1600.860 | 1607.763 | 1609.762 |
| 1618.796 | 1621.804 | 1624.815 | 1633.864 | 1634.790 | 1647.773 |
| 1652.860 | 1658.805 | 1661.822 | 1670.011 | 1670.809 | 1673.755 |
| 1679.793 | 1684.764 | 1688.773 | 1696.834 | 1706.750 | 1715.105 |
| 1715.802 | 1725.829 | 1728.795 | 1732.885 | 1740.798 | 1742.962 |
| 1745.802 | 1753.829 | 1756.819 | 1761.846 | 1773.850 | 1783.932 |
| 1784.899 | 1790.849 | 1799.779 | 1801.865 | 1810.851 | 1812.829 |
| 1818.941 | 1827.883 | 1830.907 | 1834.943 | 1848.062 | 1852.900 |
| 1860.995 | 1864.919 | 1867.886 | 1876.073 | 1876.948 | 1882.875 |
| 1890.919 | 1895.930 | 1903.885 | 1907.883 | 1913.888 | 1923.799 |
| 1931.871 | 1934.862 | 1940.880 | 1944.887 | 1953.301 | 1961.942 |
| 1976.854 | 1980.929 | 1990.922 | 2002.086 | 2013.040 | 2021.963 |
| 2026.993 | 2036.008 | 2044.952 | 2056.053 | 2058.099 | 2071.963 |
| 2080.003 | 2083.075 | 2092.985 | 2095.974 | 2101.992 | 2111.079 |
| 2120.404 | 2123.041 | 2126.984 | 2136.561 | 2138.087 | 2147.939 |
| 2152.093 | 2156.125 | 2166.113 | 2170.032 | 2182.349 | 2184.048 |
| 2191.104 | 2194.069 | 2204.049 | 2208.099 | 2220.141 | 2221.982 |
| 2229.099 | 2233.076 | 2238.139 | 2247.103 | 2258.163 | 2267.101 |
| 2277.118 | 2281.169 | 2290.185 | 2296.055 | 2308.141 | 2311.119 |
| 2315.201 | 2322.174 | 2331.206 | 2333.157 | 2348.082 | 2353.110 |
| 2363.053 | 2367.246 | 2380.175 | 2391.030 | 2395.116 | 2399.040 |
| 2411.262 | 2420.299 | 2424.145 | 2434.202 | 2437.128 | 2441.153 |



|          |          |          |          |          |          |
|----------|----------|----------|----------|----------|----------|
| 2453.047 | 2463.232 | 2466.208 | 2476.152 | 2479.169 | 2484.101 |
| 2493.308 | 2497.109 | 2509.240 | 2522.111 | 2525.189 | 2534.201 |
| 2538.135 | 2550.093 | 2560.067 | 2568.116 | 2584.251 | 2588.052 |
| 2597.381 | 2607.240 | 2616.155 | 2622.290 | 2634.098 | 2638.247 |
| 2646.209 | 2650.334 | 2655.364 | 2661.127 | 2667.176 | 2678.387 |
| 2689.307 | 2692.101 | 2695.212 | 2705.361 | 2707.322 | 2719.917 |
| 2723.219 | 2734.229 | 2740.113 | 2752.182 | 2762.543 | 2765.198 |
| 2773.809 | 2779.096 | 2789.329 | 2796.197 | 2807.246 | 2811.065 |
| 2822.000 | 2828.120 | 2839.196 | 2849.215 | 2863.105 | 2868.223 |
| 2883.062 | 2896.164 | 2906.354 | 2910.276 | 2921.474 | 2932.291 |
| 2937.069 | 2950.255 | 2960.210 | 2965.450 | 2981.161 | 2997.061 |
| 3008.091 | 3023.469 | 3028.134 | 3032.025 | 3043.563 | 3048.541 |
| 3052.035 | 3066.182 | 3078.494 | 3092.252 | 3096.145 | 3109.830 |
| 3121.438 | 3126.140 | 3139.361 | 3143.246 | 3156.427 | 3159.680 |
| 3173.198 | 3178.014 | 3189.253 | 3202.186 | 3216.824 | 3220.145 |
| 3225.990 | 3236.966 | 3241.140 | 3247.310 | 3258.438 | 3264.047 |
| 3276.089 | 3288.268 | 3292.088 | 3303.059 | 3309.131 | 3314.744 |
| 3319.820 | 3325.132 | 3336.778 | 3347.977 | 3352.960 | 3364.927 |
| 3376.446 | 3380.081 | 3391.351 | 3397.777 | 3406.642 | 3411.471 |
| 3422.989 | 3455.837 | 3475.627 | 3503.665 | 3516.569 | 3530.813 |
| 3560.469 | 3566.608 | 3580.549 | 3592.380 | 3595.402 | 3627.302 |
| 3634.225 | 3650.646 | 3667.755 | 3674.756 | 3681.682 | 3688.777 |

**Tolerance** 18.00 ppm  
**(mon)**

**Number of** 435  
**Peptides**

# Laboratory of Mass Spectrometry and Gaseous Ion Chemistry

## PROWL

- [ProFound](#)
- [ProteinInfo](#)
- [PeptideMap](#)
- [PepFrag](#)
- [X! Tandem](#)
- [X! Hunter](#)
- [GPMDB](#)
- [PROWL Home](#)
- [Chait Lab](#)



The Rockefeller University  
1230 York Avenue,  
New York, NY 10021  
(212) 327-8000



**National Center for  
Research Resources**

National Resource  
for the Mass Spectrometric  
Analysis of Biological  
Macromolecules

## ProFound



### Protein Candidates

| Rank | Expectation          | Protein Information and Sequence Analyse Tools (T)                                                     | %  | pI  | kDa   | R |
|------|----------------------|--------------------------------------------------------------------------------------------------------|----|-----|-------|---|
| 1    | 4.0×10 <sup>-8</sup> | gi 52138739 ref NP_001004443.1  hexosaminidase A [Rattus norvegicus]                                   | 34 | 6.9 | 61.09 | ⊙ |
| 2    | 5.5×10 <sup>-7</sup> | gi 51948406 ref NP_001004217.1  katanin p60 subunit A 1 [Rattus norvegicus]                            | 52 | 6.8 | 56.05 | ⊙ |
| 3    | 2.0×10 <sup>-6</sup> | gi 48428187 sp P62024 PHAR1_RAT Phosphatase and actin regulator 1                                      | 35 | 6.6 | 66.65 | ⊙ |
| 4    | 3.9×10 <sup>-6</sup> | gi 20302004 ref NP_620259.1  glutaminase 2 (liver, mitochondrial) [Rattus norvegicus]                  | 37 | 6.3 | 60.07 | ⊙ |
| 5    | 5.4×10 <sup>-6</sup> | gi 48927601 dbj BAD23895.1  Down-regulated in nephrectomized rat kidney #2 [Rattus norvegicus]         | 40 | 6.2 | 67.27 | ⊙ |
| 6    | 5.7×10 <sup>-6</sup> | gi 50979280 ref NP_001003401.1  ectodermal-neural cortex 1 [Rattus norvegicus]                         | 36 | 6.4 | 67.31 | ⊙ |
| +7   | 9.4×10 <sup>-6</sup> | gi 13751185 emb CAC37104.1  TA1 KET beta protein [Rattus norvegicus]                                   | 30 | 6.3 | 61.05 | ⊙ |
|      | -                    | gi 13751177 emb CAC37100.1  TA1 KET gamma protein [Rattus norvegicus]                                  | 26 | 6.2 | 54.07 | ⊙ |
|      | -                    | gi 13751183 emb CAC37103.1  TA2 KET beta protein [Rattus norvegicus]                                   | 26 | 6.3 | 63.21 | ⊙ |
|      | -                    | gi 13751179 emb CAC37101.1  TA2 KET gamma protein [Rattus norvegicus]                                  | 22 | 6.2 | 56.22 | ⊙ |
| 8    | 1.4×10 <sup>-5</sup> | gi 34098962 ref NP_036753.3  6-phosphofructo-2-kinase/fructose-2,6-biphosphatase 1 [Rattus norvegicus] | 40 | 6.3 | 55.38 | ⊙ |
| 9    | 5.1×10 <sup>-5</sup> | gi 21326447 ref NP_647540.1  EH-domain containing 4 [Rattus norvegicus]                                | 21 | 6.3 | 61.68 | ⊙ |
| 10   | 8.9×10 <sup>-5</sup> | gi 6981372 ref NP_037226.1  perilipin [Rattus norvegicus]                                              | 42 | 6.4 | 56.00 | ⊙ |

|    |                        |                                                                                                                                       |    |     |       |   |
|----|------------------------|---------------------------------------------------------------------------------------------------------------------------------------|----|-----|-------|---|
| 11 | 9.1 × 10 <sup>-5</sup> | gi 56268914 gb AAH87126.1  Similar to KIAA0974 protein [Rattus norvegicus]                                                            | 41 | 6.8 | 53.60 | 🔴 |
| 12 | 1.5 × 10 <sup>-4</sup> | gi 35902696 ref NP_037024.2  amiloride-sensitive cation channel 1, neuronal isoform a [Rattus norvegicus]                             | 28 | 6.7 | 64.12 | 🔴 |
| -  | -                      | gi 32527753 gb AAP86278.1  Ac2-248 [Rattus norvegicus]                                                                                | 28 | 6.9 | 67.22 | 🔴 |
| -  | -                      | gi 51948454 ref NP_001004241.1  sorting and assembly machinery component 50 homolog [Rattus norvegicus]                               | 29 | 6.3 | 52.40 | 🔴 |
| -  | -                      | gi 56905 emb CAA30916.1  unnamed protein product [Rattus norvegicus]                                                                  | 30 | 6.4 | 57.06 | 🔴 |
| -  | -                      | gi 19173754 ref NP_596887.1  testis-specific kinase 2 [Rattus norvegicus]                                                             | 28 | 6.5 | 64.17 | 🔴 |
| -  | -                      | gi 34871776 ref XP_232748.2  PREDICTED: similar to CG30497-PA, isoform A [Rattus norvegicus]                                          | 27 | 7.0 | 47.45 | 🔴 |
| -  | -                      | gi 28178055 gb AAC53453.2  hepatic multiple inositol polyphosphate phosphatase [Rattus norvegicus]                                    | 27 | 6.4 | 55.26 | 🔴 |
| -  | -                      | gi 50233797 ref NP_899162.1  keratin 5 (epidermolysis bullosa simplex, Dowling-Meara/Kobner/Weber-Cockayne types) [Rattus norvegicus] | 24 | 6.9 | 62.08 | 🔴 |
| -  | -                      | gi 975277 gb AAA75166.1  p72                                                                                                          | 22 | 7.1 | 69.47 | 🔴 |
| -  | -                      | gi 458333 gb AAA19133.1  protein tyrosine phosphatase                                                                                 | 26 | 6.9 | 68.99 | 🔴 |
| -  | -                      | gi 18543355 ref NP_570103.1  cytosolic acetyl-CoA hydrolase [Rattus norvegicus]                                                       | 21 | 6.8 | 62.63 | 🔴 |
| -  | -                      | gi 32527707 gb AAP86255.1  Ac1-581 [Rattus norvegicus]                                                                                | 37 | 6.9 | 57.34 | 🔴 |
| -  | -                      | gi 3133137 dbj BAA28175.1  N-Shc [Rattus rattus]                                                                                      | 35 | 6.9 | 52.52 | 🔴 |
| -  | -                      | gi 53733475 gb AAH83667.1  Polymerase (RNA) III (DNA directed) polypeptide C [Rattus norvegicus]                                      | 27 | 6.6 | 60.92 | 🔴 |
| -  | -                      | gi 23618920 ref NP_112339.1  PCTAIRE protein kinase 1 isoform b [Rattus norvegicus]                                                   | 28 | 6.3 | 52.85 | 🔴 |
| -  | -                      | gi 51260645 gb AAH78736.1  Klc3 protein [Rattus norvegicus]                                                                           | 25 | 6.2 | 55.87 | 🔴 |
| -  | -                      | gi 49035970 sp Q63686 PCTK1_RAT Serine/threonine-protein kinase PCTAIRE-1 (PCTAIRE-motif protein kinase 1)                            | 26 | 6.9 | 56.09 | 🔴 |
| -  | -                      | gi 730311 sp P38652 PGM1_RAT Phosphoglucomutase-1 (Glucose phosphomutase 1) (PGM 1)                                                   | 29 | 6.3 | 61.67 | 🔴 |

|   |                                                                                          |    |     |       |                                  |
|---|------------------------------------------------------------------------------------------|----|-----|-------|----------------------------------|
| - | gi 417209 sp P32577 CSK_RAT Tyrosine-protein kinase CSK (C-SRC kinase)                   | 35 | 6.6 | 51.30 | <input checked="" type="radio"/> |
| - | gi 13592101 ref NP_112388.1  syntaxin binding protein 2 [Rattus norvegicus]              | 28 | 6.3 | 67.13 | <input checked="" type="radio"/> |
| - | gi 54400716 ref NP_001005875.1  proteasome 26S non-ATPase subunit 12 [Rattus norvegicus] | 29 | 7.1 | 53.32 | <input checked="" type="radio"/> |

## NOTE:

1. To search again using **unmatched masses**, click the symbol .
2. Highly similar protein sequences were given the same rank (click "+" to expand/contract).

**Input Summary****Search id** ACAADEB2-0D9C-5CBD22E2**Sequences** 20092**Date & Time** Thu Jan 25 20:31:45 2007 UTC (Search Time: 0.58 sec.)**Sample ID****Database** NCBI nr [..\databases\nr]**Taxonomy** Rattus**Mass Range** 47 - 70 kDa**pI Range** 6.2 -7.2**Digestion** Trypsin**Missed Cuts** 1**Modifications** +C2H3ON@C(Complete); +O@M(Partial); +HPO3@STY(Partial);**Charge State** MH+**Masses (avg)****Tolerance (avg)** 1.00 ppm

|                     |          |          |          |          |          |          |          |
|---------------------|----------|----------|----------|----------|----------|----------|----------|
| <b>Masses (mon)</b> | 710.394  | 711.344  | 716.716  | 717.328  | 722.361  | 727.393  | 732.716  |
|                     | 733.299  | 738.442  | 739.356  | 744.411  | 745.420  | 750.625  | 751.417  |
|                     | 752.339  | 755.422  | 763.427  | 765.342  | 771.101  | 772.109  | 773.399  |
|                     | 779.376  | 780.447  | 786.300  | 786.904  | 787.508  | 790.379  | 792.422  |
|                     | 797.351  | 803.287  | 804.393  | 806.378  | 812.654  | 814.418  | 819.416  |
|                     | 825.511  | 828.489  | 832.501  | 838.664  | 840.495  | 848.509  | 854.436  |
|                     | 858.490  | 863.483  | 869.443  | 874.487  | 880.445  | 886.883  | 889.429  |
|                     | 895.437  | 900.415  | 906.541  | 907.473  | 909.480  | 915.576  | 916.472  |
|                     | 922.509  | 927.624  | 933.780  | 934.932  | 940.535  | 942.454  | 948.598  |
|                     | 951.480  | 953.535  | 959.506  | 961.528  | 965.579  | 971.651  | 979.720  |
|                     | 980.436  | 982.438  | 988.584  | 990.510  | 993.540  | 999.443  | 1005.706 |
|                     | 1012.759 | 1014.472 | 1016.509 | 1023.471 | 1039.525 | 1040.545 |          |
|                     | 1043.564 | 1051.621 | 1054.547 | 1057.520 | 1060.564 | 1066.686 |          |
|                     | 1067.477 | 1068.532 | 1074.567 | 1081.548 | 1087.486 | 1090.573 |          |
|                     | 1092.529 | 1098.564 | 1102.671 | 1105.622 | 1111.470 | 1117.827 |          |
|                     | 1125.534 | 1127.567 | 1134.038 | 1135.579 | 1139.619 | 1140.573 |          |
|                     | 1146.535 | 1148.632 | 1153.495 | 1163.664 | 1172.703 | 1173.578 |          |
|                     | 1186.570 | 1189.771 | 1200.659 | 1204.556 | 1212.486 | 1214.713 |          |
|                     | 1217.600 | 1224.678 | 1225.597 | 1232.628 | 1239.726 | 1240.579 |          |
|                     | 1244.612 | 1251.721 | 1252.602 | 1259.734 | 1263.678 | 1266.646 |          |
|                     | 1274.010 | 1274.658 | 1284.746 | 1286.652 | 1293.663 | 1295.745 |          |
|                     | 1300.692 | 1303.679 | 1307.692 | 1314.466 | 1316.566 | 1324.000 |          |
|                     | 1324.686 | 1331.750 | 1334.551 | 1341.691 | 1342.702 | 1346.725 |          |
|                     | 1350.655 | 1358.557 | 1361.685 | 1372.585 | 1373.732 | 1380.776 |          |
|                     | 1390.899 | 1391.677 | 1393.661 | 1400.756 | 1403.629 | 1410.497 |          |
|                     | 1414.646 | 1418.648 | 1421.692 | 1426.620 | 1434.104 | 1434.844 |          |
|                     | 1439.820 | 1446.724 | 1449.747 | 1456.675 | 1458.731 | 1464.753 |          |
|                     | 1471.924 | 1482.894 | 1485.746 | 1488.706 | 1491.772 | 1498.748 |          |
|                     | 1505.740 | 1514.739 | 1521.638 | 1523.792 | 1532.792 | 1535.771 |          |
|                     | 1542.664 | 1550.103 | 1550.792 | 1552.967 | 1556.842 | 1564.688 |          |
|                     | 1568.711 | 1575.892 | 1577.790 | 1581.750 | 1588.987 | 1596.671 |          |
|                     | 1599.740 | 1607.072 | 1607.855 | 1609.610 | 1617.885 | 1619.023 |          |
|                     | 1621.733 | 1625.829 | 1633.792 | 1646.880 | 1649.833 | 1657.827 |          |
|                     | 1667.105 | 1667.930 | 1670.929 | 1675.913 | 1679.885 | 1686.846 |          |
|                     | 1695.151 | 1708.094 | 1708.762 | 1724.970 | 1726.648 | 1730.987 |          |
|                     | 1738.896 | 1740.918 | 1747.751 | 1755.614 | 1756.883 | 1761.712 |          |
|                     | 1774.027 | 1780.812 | 1789.802 | 1791.768 | 1799.900 | 1801.014 |          |
|                     | 1808.852 | 1812.663 | 1820.871 | 1826.795 | 1835.035 | 1836.939 |          |
|                     | 1839.942 | 1848.038 | 1851.803 | 1860.739 | 1863.994 | 1868.007 |          |



|          |          |          |          |          |          |
|----------|----------|----------|----------|----------|----------|
| 1876.982 | 1885.920 | 1887.967 | 1890.953 | 1898.897 | 1907.504 |
| 1909.005 | 1915.159 | 1923.714 | 1924.985 | 1930.898 | 1935.073 |
| 1943.376 | 1945.068 | 1949.972 | 1958.069 | 1959.977 | 1965.048 |
| 1973.804 | 1978.085 | 1984.170 | 1992.037 | 2002.119 | 2005.013 |
| 2013.435 | 2014.916 | 2021.966 | 2031.637 | 2040.389 | 2042.154 |
| 2046.052 | 2054.193 | 2056.117 | 2060.150 | 2064.034 | 2074.021 |
| 2077.979 | 2087.200 | 2089.601 | 2098.970 | 2103.076 | 2110.959 |
| 2113.931 | 2119.912 | 2130.064 | 2134.760 | 2145.042 | 2150.130 |
| 2159.447 | 2162.045 | 2166.338 | 2169.191 | 2178.267 | 2182.166 |
| 2185.219 | 2188.054 | 2198.179 | 2202.128 | 2221.229 | 2227.646 |
| 2233.308 | 2238.149 | 2246.953 | 2258.206 | 2267.113 | 2276.938 |
| 2281.054 | 2284.144 | 2293.166 | 2309.064 | 2315.153 | 2319.628 |
| 2329.761 | 2333.372 | 2352.185 | 2354.995 | 2364.681 | 2366.253 |
| 2376.324 | 2392.936 | 2394.848 | 2404.616 | 2409.110 | 2420.299 |
| 2425.273 | 2435.236 | 2440.324 | 2448.651 | 2453.320 | 2463.174 |
| 2469.162 | 2478.443 | 2482.201 | 2493.020 | 2500.291 | 2504.335 |
| 2510.171 | 2519.124 | 2523.217 | 2529.989 | 2540.131 | 2545.227 |
| 2554.140 | 2564.262 | 2577.174 | 2581.143 | 2591.319 | 2593.582 |
| 2597.530 | 2608.082 | 2612.350 | 2624.002 | 2628.214 | 2638.136 |
| 2648.077 | 2651.407 | 2661.477 | 2664.188 | 2676.583 | 2688.448 |
| 2694.249 | 2705.242 | 2717.170 | 2727.857 | 2730.532 | 2735.252 |
| 2747.599 | 2757.355 | 2767.376 | 2775.215 | 2781.395 | 2789.396 |
| 2801.472 | 2809.252 | 2819.403 | 2826.276 | 2836.386 | 2846.156 |
| 2857.922 | 2861.128 | 2871.662 | 2877.261 | 2887.354 | 2890.614 |
| 2902.871 | 2914.717 | 2925.532 | 2931.329 | 2941.260 | 2944.111 |
| 2954.101 | 2964.914 | 2975.710 | 2987.484 | 2996.698 | 3004.043 |
| 3015.910 | 3022.648 | 3034.217 | 3047.370 | 3057.571 | 3063.684 |
| 3074.958 | 3082.061 | 3095.692 | 3106.837 | 3111.871 | 3122.894 |
| 3127.264 | 3134.276 | 3138.880 | 3145.377 | 3156.270 | 3163.467 |
| 3175.757 | 3178.454 | 3183.736 | 3196.257 | 3199.648 | 3210.482 |
| 3216.975 | 3220.569 | 3224.317 | 3235.499 | 3242.325 | 3255.767 |
| 3263.691 | 3276.059 | 3281.809 | 3286.056 | 3292.780 | 3303.460 |
| 3312.412 | 3325.338 | 3333.774 | 3346.430 | 3358.836 | 3369.857 |
| 3376.392 | 3387.324 | 3391.678 | 3402.792 | 3414.396 | 3425.783 |
| 3429.333 | 3435.254 | 3441.101 | 3450.514 | 3462.437 | 3469.418 |
| 3483.839 | 3488.135 | 3499.285 | 3510.932 | 3513.328 | 3527.239 |
| 3541.577 | 3548.638 | 3552.170 | 3561.974 | 3575.900 | 3589.409 |
| 3595.344 | 3608.282 | 3622.622 | 3635.446 | 3639.631 | 3647.927 |
| 3657.821 | 3672.217 | 3682.348 | 3696.792 |          |          |

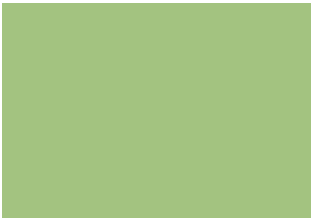

**Tolerance** 22.00 ppm  
**(mon)**

**Number of** 477  
**Peptides**

# Laboratory of Mass Spectrometry and Gaseous Ion Chemistry

## PROWL

- ▶ **ProFound**
- ▶ **ProteinInfo**
- ▶ **PeptideMap**
- ▶ **PepFrag**
- ▶ **X! Tandem**
- ▶ **X! Hunter**
- ▶ **GPMDDB**
- ▶ **PROWL Home**
- ▶ **Chait Lab**

## ProFound



### Protein Candidates

| Rank | Expectation           | Protein Information and Sequence Analyse Tools (T)                                                                                                                                | %  | pI  | kDa   | R |
|------|-----------------------|-----------------------------------------------------------------------------------------------------------------------------------------------------------------------------------|----|-----|-------|---|
| 1    | 3.5×10 <sup>-23</sup> | gi 6175089 sp P12346 TRFE_RAT Serotransferrin precursor (Transferrin) (Siderophilin) (Beta-1-metal-binding globulin)                                                              | 38 | 7.0 | 78.57 | ⊙ |
| 2    | 3.8×10 <sup>-16</sup> | gi 20302047 ref NP_620231.1  adenosine monophosphate deaminase 1 (isoform M) [Rattus norvegicus]                                                                                  | 33 | 6.5 | 87.10 | ⊙ |
| +3   | 3.7×10 <sup>-14</sup> | gi 205131 gb AAA41510.1  leukocyte common antigen related protein                                                                                                                 | 30 | 6.3 | 99.60 | ⊙ |
|      | -                     | gi 693993 emb CAA58537.1  leucocyte common antigen-related protein [Rattus norvegicus]                                                                                            | 30 | 6.5 | 71.62 | ⊙ |
| +4   | 1.1×10 <sup>-10</sup> | gi 51704215 sp Q01177 PLMN_RAT Plasminogen precursor [Contains: Plasmin heavy chain A; Activation peptide; Angiostatin; Plasmin heavy chain A, short form; Plasmin light chain B] | 18 | 6.8 | 93.26 | ⊙ |
|      | -                     | gi 33086496 gb AAP92560.1  Ab1-346 [Rattus norvegicus]                                                                                                                            | 16 | 6.8 | 88.44 | ⊙ |
| +5   | 1.5×10 <sup>-10</sup> | gi 34861509 ref XP_342003.1  PREDICTED: similar to Glycogen phosphorylase, muscle form (Myophosphorylase) [Rattus norvegicus]                                                     | 23 | 6.7 | 97.78 | ⊙ |
|      | -                     | gi 1730556 sp P09812 PYGM_RAT Glycogen phosphorylase, muscle form (Myophosphorylase)                                                                                              | 21 | 6.9 | 97.77 | ⊙ |
|      | -                     | gi 204423 gb AAA41253.1  glycogen phosphorylase                                                                                                                                   | 20 | 6.9 | 97.64 | ⊙ |
|      | -                     | gi 2425052 gb AAB72197.1  dynamin-like protein [Rattus norvegicus]                                                                                                                | 28 | 6.6 | 84.40 | ⊙ |
|      | -                     | gi 55250424 gb AAH85843.1  Dynamin 1-like [Rattus norvegicus]                                                                                                                     | 26 | 6.5 | 80.45 | ⊙ |

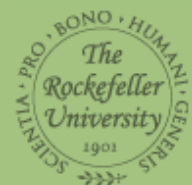

The Rockefeller University  
1230 York Avenue,  
New York, NY 10021  
(212) 327-8000

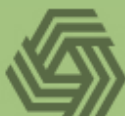

**National Center for  
Research Resources**

National Resource  
for the Mass Spectrometric  
Analysis of Biological  
Macromolecules

|   |                                                                                                                                                                                                                                            |    |     |       |   |
|---|--------------------------------------------------------------------------------------------------------------------------------------------------------------------------------------------------------------------------------------------|----|-----|-------|---|
| - | gi 27685783 ref XP_214480.1  PREDICTED: similar to Phosphatidylinositol-glycan-specific phospholipase D 1 precursor (PI-G PLD) (Glycoprotein phospholipase D) (Glycosyl-phosphatidylinositol-specific phospholipase D) [Rattus norvegicus] | 31 | 6.2 | 94.22 | 🔴 |
| - | gi 12621096 ref NP_075224.1  amiloride binding protein 1 [Rattus norvegicus]                                                                                                                                                               | 28 | 6.6 | 85.40 | 🔴 |
| - | gi 4868358 gb AAD31278.1  dynamin-like protein DLP1 isoform DLP1-37 [Rattus norvegicus]                                                                                                                                                    | 24 | 7.0 | 80.79 | 🔴 |
| - | gi 27683117 ref XP_237113.1  PREDICTED: similar to TGF beta receptor associated protein -1 [Rattus norvegicus]                                                                                                                             | 21 | 6.3 | 98.53 | 🔴 |
| - | gi 1934981 emb CAA72938.1  glucocorticoid receptor [Rattus norvegicus]                                                                                                                                                                     | 27 | 6.2 | 88.63 | 🔴 |
| - | gi 18766326 gb AAL78956.1 AF455050_1 glucocorticoid receptor [Rattus norvegicus]                                                                                                                                                           | 27 | 6.2 | 88.41 | 🔴 |
| - | gi 16758126 ref NP_445852.1  transducin-like enhancer protein 3 [Rattus norvegicus]                                                                                                                                                        | 18 | 6.7 | 83.42 | 🔴 |
| - | gi 18093102 ref NP_542420.1  dynamin 1 [Rattus norvegicus]                                                                                                                                                                                 | 19 | 6.3 | 96.25 | 🔴 |
| - | gi 13489067 ref NP_068516.1  N-ethylmaleimide sensitive fusion protein [Rattus norvegicus]                                                                                                                                                 | 18 | 6.6 | 83.21 | 🔴 |
| - | gi 17388906 gb AAF80473.2 AF162756_1 cenexin 2 [Rattus norvegicus]                                                                                                                                                                         | 22 | 6.7 | 89.88 | 🔴 |
| - | gi 47169484 tpe CAE48379.1  TPA: glutamine-fructose-6-phosphate transaminase 2 [Rattus norvegicus]                                                                                                                                         | 32 | 6.7 | 77.80 | 🔴 |
| - | gi 2494044 sp O09178 AMPD3_RAT AMP deaminase 3 (AMP deaminase isoform E)                                                                                                                                                                   | 24 | 6.6 | 88.98 | 🔴 |
| - | gi 31745156 ref NP_853662.1  F-box only protein 11 [Rattus norvegicus]                                                                                                                                                                     | 21 | 6.4 | 95.51 | 🔴 |
| - | gi 53733583 gb AAH83831.1  Ring finger protein 10 [Rattus norvegicus]                                                                                                                                                                      | 20 | 6.4 | 89.48 | 🔴 |
| - | gi 48686585 gb AAT46048.1  fidgetin-like 1 [Rattus norvegicus]                                                                                                                                                                             | 27 | 6.6 | 74.92 | 🔴 |
| - | gi 13928736 ref NP_113732.1  adenosine monophosphate deaminase 3 [Rattus norvegicus]                                                                                                                                                       | 23 | 6.9 | 92.75 | 🔴 |

|   |                                      |                                                                                                            |    |     |       |   |
|---|--------------------------------------|------------------------------------------------------------------------------------------------------------|----|-----|-------|---|
| - | gi 13242186 gb AAK16592.1 AF346902_1 | glycogen synthase [Rattus norvegicus]                                                                      | 22 | 6.6 | 81.46 | ⊙ |
| - | gi 19424312 ref NP_598286.1          | KH-type splicing regulatory protein [Rattus norvegicus]                                                    | 25 | 6.4 | 74.49 | ⊙ |
| - | gi 1346413 sp P48679 LMNA_RAT        | Lamin-A                                                                                                    | 25 | 6.5 | 74.59 | ⊙ |
| - | gi 54312102 ref NP_001005887.1       | itchy homolog E3 ubiquitin protein ligase [Rattus norvegicus]                                              | 21 | 6.3 | 98.47 | ⊙ |
| - | gi 40786501 ref NP_955434.1          | sperm protein SSP411 [Rattus norvegicus]                                                                   | 23 | 6.6 | 89.03 | ⊙ |
| - | gi 22902132 ref NP_690600.1          | RNA binding motif protein 10 [Rattus norvegicus]                                                           | 19 | 6.3 | 94.71 | ⊙ |
| - | gi 6978771 ref NP_037331.1           | dynamamin 2 [Rattus norvegicus]                                                                            | 15 | 7.0 | 98.55 | ⊙ |
| - | gi 7549773 ref NP_036873.1           | K-kininogen [Rattus norvegicus]                                                                            | 22 | 6.3 | 72.00 | ⊙ |
| - | gi 55715908 gb AAH85700.1            | Nibrin [Rattus norvegicus]                                                                                 | 13 | 6.7 | 84.14 | ⊙ |
| - | gi 20302036 ref NP_620228.1          | nibrin [Rattus norvegicus]                                                                                 | 15 | 6.4 | 84.31 | ⊙ |
| - | gi 20301994 ref NP_620205.1          | fibroblast activation protein [Rattus norvegicus]                                                          | 19 | 6.2 | 88.51 | ⊙ |
| - | gi 9506961 ref NP_062205.1           | peptidyl arginine deiminase, type I [Rattus norvegicus]                                                    | 19 | 6.7 | 74.58 | ⊙ |
| - | gi 1072002 pir  S27267               | lamin A - rat                                                                                              | 20 | 6.3 | 74.51 | ⊙ |
| - | gi 34870013 ref XP_344049.1          | PREDICTED: similar to DNA replication licensing factor MCM4 (CDC21 homolog) (P1-CDC21) [Rattus norvegicus] | 25 | 6.8 | 97.24 | ⊙ |
| - | gi 25742586 ref NP_071622.1          | vacuolar protein sorting 33B [Rattus norvegicus]                                                           | 20 | 6.4 | 71.36 | ⊙ |
| - | gi 16758510 ref NP_446142.1          | DnaJ (Hsp40) homolog, subfamily C, member 14 [Rattus norvegicus]                                           | 16 | 7.1 | 79.65 | ⊙ |

## NOTE:

1. To search again using **unmatched masses**, click the symbol ⊙.
2. Highly similar protein sequences were given the same rank (click "+" to expand/contract).

## Input Summary

Search id AAD6D3BA-0F70-5AE9210E

**Sequences** 20092**Date & Time** Thu Jan 25 21:10:46 2007 UTC (Search Time: 0.53 sec.)**Sample ID****Database** NCBI nr [..\databases\nr]**Taxonomy** Rattus**Mass Range** 70 - 100 kDa**pI Range** 6.2 -7.2**Digestion** Trypsin**Missed Cuts** 1**Modifications** +C2H3ON@C(Complete); +O@M(Partial);**Charge State** MH+**Masses (avg)****Tolerance (avg)** 1.00 ppm

| <b>Masses (mon)</b> | 707.374  | 712.390  | 717.406  | 719.424  | 723.415  | 726.348  | 731.413 |
|---------------------|----------|----------|----------|----------|----------|----------|---------|
|                     | 732.377  | 737.444  | 738.430  | 740.387  | 745.409  | 750.392  | 754.395 |
|                     | 764.438  | 768.404  | 772.417  | 778.390  | 784.462  | 790.425  | 791.466 |
|                     | 793.397  | 800.383  | 804.479  | 813.412  | 818.368  | 824.459  | 827.513 |
|                     | 829.429  | 835.425  | 836.437  | 840.468  | 849.461  | 853.426  | 859.469 |
|                     | 860.455  | 863.456  | 878.483  | 885.455  | 887.437  | 893.479  | 903.459 |
|                     | 906.495  | 912.540  | 913.455  | 915.489  | 921.483  | 922.545  | 925.530 |
|                     | 931.475  | 935.483  | 942.512  | 945.488  | 949.568  | 955.526  | 961.567 |
|                     | 963.487  | 969.740  | 970.558  | 979.549  | 986.510  | 992.689  | 993.495 |
|                     | 999.505  | 1001.527 | 1004.531 | 1013.529 | 1017.538 | 1024.568 |         |
|                     | 1040.523 | 1051.687 | 1057.521 | 1059.578 | 1061.572 | 1068.555 |         |
|                     | 1079.514 | 1080.554 | 1087.554 | 1090.574 | 1096.760 | 1097.540 |         |
|                     | 1104.551 | 1105.580 | 1107.550 | 1113.694 | 1114.548 | 1125.582 |         |
|                     | 1132.569 | 1135.606 | 1138.578 | 1141.486 | 1147.565 | 1150.599 |         |
|                     | 1156.564 | 1163.577 | 1173.584 | 1174.645 | 1186.552 | 1200.665 |         |
|                     | 1208.630 | 1216.034 | 1216.621 | 1218.547 | 1226.665 | 1233.533 |         |
|                     | 1234.668 | 1241.820 | 1243.576 | 1247.566 | 1254.708 | 1258.620 |         |
|                     | 1265.650 | 1269.627 | 1272.675 | 1284.708 | 1285.673 | 1289.537 |         |
|                     | 1296.628 | 1300.630 | 1303.617 | 1308.628 | 1316.675 | 1327.664 |         |
|                     | 1329.651 | 1336.630 | 1337.664 | 1348.665 | 1355.670 | 1364.681 |         |
|                     | 1374.670 | 1380.640 | 1387.878 | 1388.781 | 1390.688 | 1392.747 |         |
|                     | 1400.696 | 1406.648 | 1413.725 | 1420.770 | 1423.740 | 1431.726 |         |
|                     | 1432.745 | 1440.783 | 1447.843 | 1449.688 | 1451.688 | 1462.711 |         |

|          |          |          |          |          |          |
|----------|----------|----------|----------|----------|----------|
| 1463.741 | 1471.710 | 1483.717 | 1484.729 | 1500.750 | 1514.760 |
| 1515.730 | 1518.640 | 1525.732 | 1530.759 | 1533.736 | 1539.700 |
| 1555.139 | 1555.750 | 1562.901 | 1563.753 | 1566.736 | 1573.752 |
| 1579.820 | 1582.792 | 1589.656 | 1594.787 | 1597.800 | 1605.641 |
| 1607.691 | 1610.770 | 1618.968 | 1619.699 | 1623.793 | 1626.779 |
| 1635.807 | 1646.799 | 1652.706 | 1656.732 | 1665.787 | 1666.722 |
| 1670.765 | 1678.755 | 1681.763 | 1684.802 | 1692.881 | 1695.847 |
| 1705.815 | 1716.232 | 1725.729 | 1728.863 | 1732.813 | 1744.773 |
| 1745.842 | 1754.885 | 1756.888 | 1782.949 | 1783.632 | 1791.945 |
| 1796.937 | 1802.850 | 1811.810 | 1814.936 | 1817.806 | 1820.879 |
| 1828.876 | 1832.794 | 1835.851 | 1848.829 | 1850.827 | 1859.993 |
| 1861.881 | 1863.858 | 1872.852 | 1875.796 | 1881.868 | 1890.817 |
| 1895.916 | 1906.928 | 1919.889 | 1921.925 | 1932.953 | 1940.926 |
| 1951.026 | 1953.883 | 1971.934 | 1976.962 | 1985.925 | 2003.943 |
| 2007.804 | 2009.947 | 2023.012 | 2025.982 | 2034.023 | 2037.974 |
| 2041.867 | 2046.983 | 2056.013 | 2058.915 | 2068.032 | 2076.126 |
| 2077.968 | 2083.006 | 2093.995 | 2095.998 | 2105.815 | 2108.938 |
| 2111.970 | 2124.959 | 2128.998 | 2139.016 | 2149.028 | 2151.027 |
| 2154.996 | 2164.073 | 2165.985 | 2169.905 | 2182.159 | 2183.921 |
| 2190.978 | 2194.069 | 2203.987 | 2208.100 | 2220.906 | 2230.026 |
| 2232.157 | 2235.118 | 2238.144 | 2248.066 | 2257.082 | 2266.019 |
| 2268.072 | 2277.031 | 2279.153 | 2282.176 | 2292.131 | 2308.252 |
| 2311.004 | 2314.114 | 2324.138 | 2327.159 | 2352.086 | 2361.308 |
| 2364.026 | 2367.106 | 2377.211 | 2379.971 | 2394.289 | 2396.003 |
| 2399.005 | 2408.749 | 2410.998 | 2420.202 | 2424.048 | 2433.277 |
| 2435.172 | 2442.025 | 2448.121 | 2452.991 | 2463.445 | 2470.104 |
| 2483.012 | 2510.076 | 2522.276 | 2543.230 | 2568.298 | 2578.106 |
| 2586.255 | 2597.231 | 2600.322 | 2612.154 | 2617.184 | 2629.365 |
| 2633.305 | 2645.247 | 2652.217 | 2662.359 | 2665.454 | 2668.133 |
| 2678.479 | 2681.339 | 2685.213 | 2695.208 | 2706.168 | 2716.413 |
| 2726.324 | 2740.344 | 2750.335 | 2757.301 | 2767.323 | 2772.997 |
| 2779.246 | 2782.372 | 2792.261 | 2796.179 | 2806.486 | 2811.414 |
| 2821.642 | 2825.222 | 2830.381 | 2839.243 | 2849.305 | 2853.370 |
| 2860.501 | 2866.126 | 2876.452 | 2880.538 | 2893.318 | 2899.955 |
| 2904.637 | 2916.197 | 2932.485 | 2943.222 | 2945.819 | 2950.319 |
| 2963.326 | 2980.113 | 2985.449 | 2996.579 | 3002.003 | 3005.179 |
| 3016.604 | 3021.343 | 3029.349 | 3040.560 | 3043.422 | 3061.328 |
| 3064.461 | 3076.484 | 3080.634 | 3084.524 | 3091.602 | 3097.524 |
| 3110.438 | 3116.605 | 3128.278 | 3139.670 | 3143.371 | 3146.394 |



|          |          |          |          |          |          |
|----------|----------|----------|----------|----------|----------|
| 3158.312 | 3170.707 | 3177.502 | 3188.489 | 3203.574 | 3215.447 |
| 3234.005 | 3236.228 | 3247.737 | 3251.348 | 3260.423 | 3264.579 |
| 3277.026 | 3280.846 | 3289.729 | 3292.396 | 3305.632 | 3312.260 |
| 3325.536 | 3337.048 | 3339.773 | 3353.650 | 3367.634 | 3373.972 |
| 3381.647 | 3397.691 | 3413.263 | 3432.697 | 3443.957 | 3463.439 |
| 3482.498 | 3516.017 | 3528.052 | 3539.827 | 3542.674 | 3563.919 |
| 3567.500 | 3581.679 | 3598.229 | 3628.968 | 3643.836 | 3653.074 |
| 3668.604 | 3684.044 | 3697.140 |          |          |          |

**Tolerance** 38.00 ppm  
**(mon)**

**Number of** 426  
**Peptides**



PROWL

- [ProFound](#)
- [ProteinInfo](#)
- [PeptideMap](#)
- [PepFrag](#)
- [X! Tandem](#)
- [X! Hunter](#)
- [GPMDB](#)

- [PROWL Home](#)
- [Chait Lab](#)

The Rockefeller  
University

The Rockefeller University  
1230 York Avenue,  
New York, NY 10021  
(212) 327-8000

National Center of  
Research Resources

National Resource  
for the Mass Spectrometric  
Analysis of Biological  
Macromolecules

## ProFound

### Protein Candidates

| Rank | Expectation          | Protein Information and Sequence Analyse Tools (T)       | %                  | pI  | kDa  | R                        |
|------|----------------------|----------------------------------------------------------|--------------------|-----|------|--------------------------|
| 1    | 2.4×10 <sup>-4</sup> | <a href="#">gi 51703333 sp P62989 UBIQ_RAT</a> Ubiquitin | <a href="#">32</a> | 6.6 | 8.55 | <input type="checkbox"/> |

### NOTE:

- To search again using [unmatched masses](#), click the symbol .

### Input Summary

**Search id** A7E8D3DE-123C-581D1E65

**Sequences** 20076

**Date & Time** Tue Feb 20 15:55:18 2007 UTC (Search Time: 0.19 sec.)

**Sample ID** 20040813 richardson NIA set 1 spot 6010 CONSENSUS search

**Database** NCBIInr [..\databases\nr]

**Taxonomy** Rattus

**Mass Range** 0 - 10 kDa

**pI Range** 6.4 - 8.0

**Digestion** Trypsin

**Missed Cuts** 0

**Modifications** +C2H3ON@C(Complete); +O@M(Partial);

**Charge State** MH+

**Masses (avg)**

**Tolerance (avg)** 1.00 ppm

|                     |          |          |          |          |          |          |          |          |          |
|---------------------|----------|----------|----------|----------|----------|----------|----------|----------|----------|
| <b>Masses (mon)</b> | 700.330  | 707.359  | 712.698  | 717.354  | 723.364  | 728.382  | 731.380  | 736.352  | 739.403  |
|                     | 741.397  | 743.431  | 749.402  | 750.488  | 756.413  | 764.405  | 769.415  | 775.396  | 776.407  |
|                     | 778.470  | 781.531  | 788.427  | 789.409  | 796.492  | 798.505  | 804.445  | 813.435  | 819.469  |
|                     | 820.394  | 825.449  | 831.411  | 836.869  | 841.467  | 849.446  | 856.498  | 862.473  | 863.481  |
|                     | 866.507  | 877.491  | 881.480  | 884.518  | 891.474  | 903.463  | 904.434  | 917.488  | 921.466  |
|                     | 933.470  | 940.513  | 943.548  | 950.462  | 952.558  | 955.508  | 962.508  | 964.513  | 967.544  |
|                     | 970.518  | 971.545  | 978.519  | 984.505  | 990.530  | 991.525  | 994.515  | 999.549  | 1003.552 |
|                     | 1018.999 | 1019.536 | 1021.513 | 1034.542 | 1037.530 | 1039.525 | 1051.556 | 1052.559 |          |
|                     | 1053.542 | 1060.586 | 1065.543 | 1067.631 | 1079.558 | 1081.615 | 1087.575 | 1091.551 |          |
|                     | 1097.851 | 1098.565 | 1102.605 | 1106.541 | 1107.548 | 1114.568 | 1124.632 | 1133.563 |          |
|                     | 1138.576 | 1145.603 | 1146.582 | 1149.592 | 1156.607 | 1164.584 | 1172.613 | 1175.656 |          |
|                     | 1187.615 | 1190.632 | 1209.000 | 1209.585 | 1211.599 | 1218.848 | 1219.600 | 1220.610 |          |
|                     | 1227.627 | 1232.631 | 1234.687 | 1242.645 | 1244.663 | 1247.632 | 1255.608 | 1261.625 |          |
|                     | 1263.658 | 1271.661 | 1276.682 | 1284.630 | 1285.643 | 1291.659 | 1298.659 | 1299.677 |          |
|                     | 1302.615 | 1308.670 | 1316.644 | 1317.695 | 1328.712 | 1329.669 | 1336.697 | 1338.691 |          |
|                     | 1347.744 | 1348.782 | 1356.704 | 1364.897 | 1373.115 | 1373.689 | 1381.683 | 1382.685 |          |
|                     | 1390.705 | 1398.699 | 1401.671 | 1409.721 | 1411.693 | 1417.693 | 1425.688 | 1432.763 |          |
|                     | 1434.802 | 1442.768 | 1444.737 | 1447.732 | 1452.679 | 1463.758 | 1466.773 | 1474.750 |          |
|                     | 1477.776 | 1485.679 | 1486.743 | 1501.758 | 1504.759 | 1514.751 | 1519.759 | 1522.778 |          |
|                     | 1529.774 | 1534.755 | 1537.789 | 1545.163 | 1545.798 | 1555.156 | 1555.819 | 1562.784 |          |
|                     | 1565.766 | 1573.074 | 1573.768 | 1579.783 | 1586.775 | 1590.773 | 1593.781 | 1600.777 |          |
|                     | 1607.815 | 1615.815 | 1619.688 | 1627.799 | 1636.802 | 1644.793 | 1647.825 | 1656.802 |          |
|                     | 1657.816 | 1666.022 | 1666.847 | 1672.817 | 1680.867 | 1681.889 | 1690.819 | 1699.246 |          |
|                     | 1705.802 | 1714.824 | 1725.855 | 1728.877 | 1732.854 | 1735.827 | 1744.871 | 1748.867 |          |
|                     | 1757.889 | 1759.866 | 1762.833 | 1771.919 | 1783.872 | 1787.884 | 1791.787 | 1799.833 |          |
|                     | 1801.948 | 1809.902 | 1812.883 | 1820.919 | 1822.902 | 1826.901 | 1834.911 | 1847.913 |          |
|                     | 1850.925 | 1859.045 | 1860.932 | 1867.969 | 1875.893 | 1879.921 | 1887.899 | 1889.919 |          |
|                     | 1894.986 | 1897.919 | 1901.911 | 1907.906 | 1916.976 | 1918.982 | 1924.030 | 1931.924 |          |
|                     | 1935.004 | 1943.960 | 1947.941 | 1952.044 | 1960.980 | 1965.993 | 1973.944 | 1980.022 |          |
|                     | 1988.001 | 1995.996 | 2004.972 | 2012.004 | 2020.017 | 2022.015 | 2032.051 | 2041.959 |          |
|                     | 2049.056 | 2057.998 | 2062.002 | 2065.000 | 2074.039 | 2083.065 | 2092.143 | 2093.991 |          |
|                     | 2104.019 | 2108.037 | 2111.100 | 2121.044 | 2127.035 | 2130.205 | 2140.007 | 2151.051 |          |
|                     | 2156.082 | 2165.255 | 2168.045 | 2185.076 | 2188.099 | 2195.036 | 2201.067 | 2222.066 |          |
|                     | 2225.052 | 2230.106 | 2233.128 | 2242.081 | 2245.016 | 2259.016 | 2265.103 | 2274.087 |          |
|                     | 2285.021 | 2294.141 | 2311.142 | 2315.191 | 2322.164 | 2333.181 | 2353.069 | 2362.161 |          |
|                     | 2371.173 | 2380.037 | 2393.166 | 2396.199 | 2399.101 | 2409.274 | 2415.262 | 2424.142 |          |
|                     | 2432.208 | 2441.119 | 2448.179 | 2458.155 | 2465.106 | 2474.178 | 2476.960 | 2480.347 |          |
|                     | 2484.173 | 2491.228 | 2501.190 | 2509.215 | 2520.193 | 2527.266 | 2538.215 | 2548.237 |          |
|                     | 2553.204 | 2564.210 | 2568.134 | 2581.192 | 2586.225 | 2598.263 | 2608.369 | 2612.258 |          |
|                     | 2623.183 | 2631.194 | 2643.233 | 2653.217 | 2663.115 | 2666.246 | 2670.212 | 2681.259 |          |
|                     | 2687.367 | 2695.300 | 2708.151 | 2719.241 | 2723.247 | 2736.446 | 2740.394 | 2744.275 |          |
|                     | 2751.196 | 2757.136 | 2769.956 | 2773.432 | 2776.271 | 2779.324 | 2789.563 | 2802.886 |          |
|                     | 2806.311 | 2817.278 | 2822.394 | 2832.460 | 2839.385 | 2851.351 | 2858.226 | 2869.294 |          |
|                     | 2873.880 | 2884.508 | 2888.417 | 2904.479 | 2916.146 | 2921.023 | 2933.014 | 2942.436 |          |
|                     | 2949.273 | 2959.527 | 2962.533 | 2967.339 | 2970.386 | 2983.399 | 2995.850 | 2999.243 |          |
|                     | 3009.916 | 3012.319 | 3016.055 | 3026.980 | 3038.482 | 3045.468 | 3060.246 | 3072.222 |          |
|                     | 3076.032 | 3089.087 | 3097.518 | 3108.327 | 3115.468 | 3127.513 | 3133.243 | 3139.695 |          |



|          |          |          |          |          |          |          |          |
|----------|----------|----------|----------|----------|----------|----------|----------|
| 3151.372 | 3155.988 | 3166.974 | 3177.675 | 3188.509 | 3200.123 | 3202.792 | 3214.852 |
| 3221.999 | 3232.065 | 3245.179 | 3249.172 | 3267.093 | 3272.294 | 3285.759 | 3301.690 |
| 3313.470 | 3316.535 | 3330.635 | 3340.130 | 3351.470 | 3364.472 | 3367.912 | 3371.588 |
| 3375.659 | 3390.393 | 3400.680 | 3410.234 | 3419.605 | 3432.344 | 3443.010 | 3446.569 |
| 3463.083 | 3475.584 | 3490.416 | 3505.240 | 3508.392 | 3520.615 | 3533.179 | 3537.025 |
| 3539.951 | 3545.004 | 3553.393 | 3569.557 | 3581.443 | 3596.579 | 3612.355 | 3619.851 |
| 3631.657 | 3634.825 | 3640.027 | 3654.431 | 3667.231 | 3670.333 | 3684.143 | 3692.245 |
| 3697.323 |          |          |          |          |          |          |          |

**Tolerance (mon)** 10.00 ppm

**Number of Peptides** 440

PROWL

## ProFound

- [ProFound](#)
- [ProteinInfo](#)
- [PeptideMap](#)
- [PepFrag](#)
- [X! Tandem](#)
- [X! Hunter](#)
- [GPMDB](#)
- [PROWL Home](#)
- [Chait Lab](#)

The Rockefeller  
University

The Rockefeller University  
1230 York Avenue,  
New York, NY 10021  
(212) 327-8000

National Center of  
Research Resources

National Resource  
for the Mass Spectrometric  
Analysis of Biological  
Macromolecules

## Protein Candidates

| Rank | Expectation           | Protein Information and Sequence Analyse Tools (T)                                                                                                        | %                  | pI  | kDa   | R                        |
|------|-----------------------|-----------------------------------------------------------------------------------------------------------------------------------------------------------|--------------------|-----|-------|--------------------------|
| +1   | 2.3×10 <sup>-28</sup> | <a href="#">gi 55926145 ref NP_114021.2 </a> expressed in non-metastatic cells 2 [Rattus norvegicus]                                                      | <a href="#">32</a> | 6.9 | 17.38 | <input type="checkbox"/> |
|      | -                     | <a href="#">gi 206580 gb AAA42017.1 </a> RBL-NDP kinase 18kDa subunit (p18)                                                                               | <a href="#">20</a> | 6.9 | 17.47 | <input type="checkbox"/> |
| 2    | 2.1×10 <sup>-8</sup>  | <a href="#">gi 2143727 pir  S62669</a> folate binding protein I - rat (fragment)                                                                          | <a href="#">59</a> | 6.0 | 2.55  | <input type="checkbox"/> |
| 3    | 1.2×10 <sup>-7</sup>  | <a href="#">gi 6724099 gb AAF26845.1 AF196188_1</a> T cell receptor V delta 1 [Rattus norvegicus]                                                         | <a href="#">28</a> | 9.5 | 10.37 | <input type="checkbox"/> |
| 4    | 2.2×10 <sup>-7</sup>  | <a href="#">gi 228110 prf  1717324AA</a> T cell receptor variable region:SUBUNIT=beta: ISOTYPE=19                                                         | <a href="#">32</a> | 9.5 | 13.76 | <input type="checkbox"/> |
| 5    | 2.4×10 <sup>-7</sup>  | <a href="#">gi 6724133 gb AAF26861.1 AF196206_1</a> T cell receptor V delta 3; delta T cell receptor V delta 3 [Rattus norvegicus]                        | <a href="#">17</a> | 9.5 | 14.98 | <input type="checkbox"/> |
| 6    | 1.2×10 <sup>-6</sup>  | <a href="#">gi 34875549 ref XP_344453.1 </a> PREDICTED: similar to ATP synthase, H+ transporting, mitochondrial F0 complex, subunit G [Rattus norvegicus] | <a href="#">23</a> | 9.5 | 11.35 | <input type="checkbox"/> |
| 7    | 1.5×10 <sup>-6</sup>  | <a href="#">gi 902727 emb CAA61852.1 </a> putative olfactory receptor [Rattus norvegicus]                                                                 | <a href="#">15</a> | 9.2 | 18.07 | <input type="checkbox"/> |
| 8    | 1.5×10 <sup>-6</sup>  | <a href="#">gi 4102801 gb AAD01591.1 </a> retinoid X receptor gamma [Rattus norvegicus]                                                                   | <a href="#">21</a> | 8.9 | 12.41 | <input type="checkbox"/> |
| 9    | 1.9×10 <sup>-6</sup>  | <a href="#">gi 19577318 emb CAD21563.1 </a> ATPase subunit 8 [Rattus norvegicus]                                                                          | <a href="#">54</a> | 9.3 | 7.61  | <input type="checkbox"/> |
| 10   | 2.2×10 <sup>-6</sup>  | <a href="#">gi 203022 gb AAA40773.1 </a> alpha-tropomyosin                                                                                                | <a href="#">25</a> | 6.2 | 4.98  | <input type="checkbox"/> |
| 11   | 2.8×10 <sup>-6</sup>  | <a href="#">gi 55741522 ref NP_001006961.1 </a> mitochondrial protein, 18 kDa [Rattus norvegicus]                                                         | <a href="#">14</a> | 9.5 | 18.41 | <input type="checkbox"/> |
| 12   | 3.8×10 <sup>-6</sup>  | <a href="#">gi 7963642 gb AAF71299.1 AF213509_1</a> T cell receptor beta chain variable segment 13 precursor [Rattus norvegicus]                          | <a href="#">28</a> | 6.1 | 12.81 | <input type="checkbox"/> |
| 13   | 1.0×10 <sup>-5</sup>  | <a href="#">gi 27662826 ref XP_216691.1 </a> PREDICTED: similar to anterior gradient 2 [Rattus norvegicus]                                                | <a href="#">7</a>  | 9.0 | 19.91 | <input type="checkbox"/> |
| 14   | 1.1×10 <sup>-5</sup>  | <a href="#">gi 11066046 gb AAG28431.1 AF194442_1</a> SMDF neuregulin beta 4 [Rattus norvegicus]                                                           | <a href="#">23</a> | 9.6 | 15.56 | <input type="checkbox"/> |
| 15   | 2.4×10 <sup>-5</sup>  | <a href="#">gi 2896018 gb AAC03102.1 </a> Axl receptor tyrosine kinase [Rattus norvegicus]                                                                | <a href="#">32</a> | 9.4 | 8.88  | <input type="checkbox"/> |
| 16   | 3.4×10 <sup>-5</sup>  | <a href="#">gi 509827 gb AAA53178.1 </a> T-cell receptor beta-chain V region                                                                              | <a href="#">16</a> | 9.5 | 9.92  | <input type="checkbox"/> |
| 17   | 5.4×10 <sup>-5</sup>  | <a href="#">gi 543464 pir  B49828</a> T-cell receptor beta chain V region (Vbeta8.2) - rat                                                                | <a href="#">15</a> | 9.3 | 10.61 | <input type="checkbox"/> |
| 18   | 5.4×10 <sup>-5</sup>  | <a href="#">gi 207216 gb AAA51370.1 </a> T-cell receptor beta                                                                                             | <a href="#">12</a> | 9.3 | 12.84 | <input type="checkbox"/> |
| 19   | 8.3×10 <sup>-5</sup>  | <a href="#">gi 509835 gb AAA53182.1 </a> T-cell receptor beta-chain V region                                                                              | <a href="#">16</a> | 9.8 | 9.95  | <input type="checkbox"/> |

|    |                      |                                                                                                                                                                                               |                    |     |       |                          |
|----|----------------------|-----------------------------------------------------------------------------------------------------------------------------------------------------------------------------------------------|--------------------|-----|-------|--------------------------|
| 20 | 8.3×10 <sup>-5</sup> | <a href="#">gi 517184 emb CAA54957.1</a> T-cell receptor beta chain, variable region [Rattus norvegicus]                                                                                      | <a href="#">15</a> | 9.6 | 10.60 | <input type="checkbox"/> |
| 21 | 8.3×10 <sup>-5</sup> | <a href="#">gi 112370 pir B30598</a> T-cell receptor beta chain precursor V region (Z85) - rat (fragment)                                                                                     | <a href="#">11</a> | 9.3 | 14.50 | <input type="checkbox"/> |
| 22 | 8.3×10 <sup>-5</sup> | <a href="#">gi 999290 gb AAB34737.1</a> T-cell receptor av1 V beta chain 8.4 {V-D-J junction} [rats, LER, liver, Peptide Partial, 94 aa]                                                      | <a href="#">15</a> | 9.6 | 10.59 | <input type="checkbox"/> |
| 23 | 8.3×10 <sup>-5</sup> | <a href="#">gi 92796 pir S04542</a> T-cell receptor beta chain precursor V-J region (Z82) - rat (fragment)                                                                                    | <a href="#">11</a> | 9.5 | 14.61 | <input type="checkbox"/> |
| 24 | 1.2×10 <sup>-4</sup> | <a href="#">gi 207218 gb AAA51371.1</a> T-cell receptor beta                                                                                                                                  | <a href="#">12</a> | 9.4 | 12.80 | <input type="checkbox"/> |
| 25 | 1.7×10 <sup>-4</sup> | <a href="#">gi 228121 prf 1717324L</a> T cell receptor variable region:SUBUNIT=beta: ISOTYPE=8.2                                                                                              | <a href="#">11</a> | 9.5 | 13.77 | <input type="checkbox"/> |
| 26 | 1.7×10 <sup>-4</sup> | <a href="#">gi 1438517 emb CAA66261.1</a> T-cell receptor beta chain [Rattus norvegicus]                                                                                                      | <a href="#">13</a> | 9.1 | 12.08 | <input type="checkbox"/> |
| 27 | 5.9×10 <sup>-4</sup> | <a href="#">gi 92402 pir A23986</a> Ig kappa chain precursor V region (IR162) - rat                                                                                                           | <a href="#">17</a> | 8.8 | 13.96 | <input type="checkbox"/> |
| 28 | 9.2×10 <sup>-4</sup> | <a href="#">gi 561845 gb AAA51358.1</a> This CDS feature is included to show the translation of the corresponding V_region. Presently translation qualifiers on V_region features are illegal | <a href="#">30</a> | 6.0 | 13.14 | <input type="checkbox"/> |
| 29 | 0.94                 | <a href="#">gi 561849 gb AAA51363.1</a> This CDS feature is included to show the translation of the corresponding C_region. Presently translation qualifiers on C_region features are illegal | <a href="#">91</a> | 6.7 | 1.19  | <input type="checkbox"/> |

## NOTE:

1. To search again using [unmatched masses](#), click the symbol .
2. Highly similar protein sequences were given the same rank (click "+" to expand/contract).

## Input Summary

Search id B42CDE18-05F8-64612AA9

Sequences 20076

Date &amp; Time Tue Feb 20 16:04:00 2007 UTC (Search Time: 0.28 sec.)

Sample ID 20040813 richardson NIA set 1 spot 6110 CONSENSUS search

Database NCBI nr [..\databases\nr]

Taxonomy Rattus

Mass Range 0 - 20 kDa

pI Range 6.0 -10.0

Digestion Trypsin

Missed Cuts 0

Modifications +C2H3ON@C(Complete); +O@M(Partial);

Charge State MH+

Masses (avg)

Tolerance (avg) 1.00 ppm

**Masses (mon)** 707.371 718.574 719.403 720.377 725.403 730.373 731.446 733.375 738.409  
739.378 743.424 748.419 753.376 754.391 764.397 768.456 774.451 775.424  
778.386 784.458 785.400 787.417 790.383 796.425 802.358 804.454 813.674  
814.480 820.518 821.462 823.468 827.448 833.767 834.428 835.399 841.846  
848.454 849.414 854.519 859.500 865.425 866.474 877.457 881.427 888.490  
890.476 899.510 906.443 913.484 915.498 921.532 922.512 932.735 933.536  
940.455 944.544 948.496 954.576 960.488 966.669 967.547 968.489 975.473  
984.613 991.570 992.523 997.574 1001.551 1018.591 1020.589 1023.579  
1029.550 1030.543 1040.588 1041.565 1044.520 1051.490 1057.541 1060.607  
1066.685 1067.498 1068.553 1074.544 1076.574 1079.622 1085.599 1088.639  
1094.574 1100.570 1102.602 1105.509 1107.545 1114.632 1121.495 1123.546  
1130.639 1136.892 1137.573 1140.684 1145.621 1151.618 1154.611 1163.615  
1167.681 1174.635 1175.650 1184.620 1187.632 1189.651 1196.600 1197.625  
1203.664 1211.615 1213.607 1217.689 1224.814 1225.545 1226.676 1229.647  
1232.670 1241.641 1243.704 1250.763 1252.572 1256.672 1260.683 1268.677  
1269.660 1275.566 1284.571 1287.660 1295.714 1298.720 1300.734 1308.683  
1315.729 1316.534 1326.737 1333.512 1335.749 1339.786 1341.708 1344.767  
1352.602 1355.698 1370.757 1377.968 1379.718 1382.794 1384.797 1391.694  
1394.759 1398.784 1401.781 1408.669 1409.781 1412.790 1415.726 1424.832  
1434.758 1441.829 1448.764 1449.661 1451.635 1458.747 1465.646 1472.792  
1479.724 1483.636 1500.824 1503.667 1514.860 1516.826 1521.680 1525.832  
1532.834 1534.811 1537.766 1540.803 1548.741 1553.938 1561.270 1562.787  
1569.767 1571.795 1580.855 1581.819 1586.696 1594.616 1598.893 1604.875  
1611.948 1612.787 1616.871 1619.634 1630.000 1637.892 1646.950 1649.792  
1658.829 1660.941 1669.925 1674.798 1682.880 1690.816 1692.893 1701.047  
1701.880 1715.852 1724.900 1729.908 1733.859 1737.898 1745.738 1746.892  
1751.059 1753.906 1761.810 1763.873 1773.728 1775.940 1783.922 1785.913  
1793.918 1795.886 1798.826 1801.912 1810.181 1810.897 1812.846 1815.972  
1823.929 1828.936 1837.210 1848.338 1849.901 1852.914 1861.910 1865.689  
1867.930 1875.008 1883.999 1892.836 1902.956 1911.955 1919.854 1927.977  
1931.852 1939.940 1941.987 1950.900 1955.066 1965.979 1977.311 1980.037  
1988.255 2003.026 2007.579 2011.141 2020.726 2024.815 2031.031 2037.045  
2048.977 2058.010 2067.155 2070.125 2078.990 2082.922 2087.935 2097.239  
2105.110 2111.944 2122.294 2125.336 2128.007 2138.022 2141.511 2151.152  
2152.964 2157.998 2167.049 2183.036 2193.117 2195.073 2204.929 2207.966  
2220.294 2223.151 2229.983 2234.056 2237.177 2246.297 2255.563 2257.163  
2268.024 2272.227 2281.161 2284.057 2293.434 2295.014 2310.917 2317.137  
2331.165 2340.214 2353.004 2356.207 2365.272 2367.205 2375.962 2379.279  
2393.428 2398.901 2408.709 2409.899 2420.160 2423.110 2432.237 2439.384  
2450.475 2454.111 2464.901 2473.134 2477.189 2483.294 2492.802 2501.790  
2509.747 2513.326 2526.851 2543.436 2546.834 2557.281 2567.715 2570.105  
2582.277 2593.105 2604.850 2609.218 2614.760 2620.447 2632.357 2644.814  
2649.284 2655.147 2660.078 2670.268 2680.721 2687.492 2691.334 2695.215  
2706.172 2716.204 2722.527 2732.836 2744.258 2749.412 2759.949 2772.988  
2781.188 2791.785 2802.937 2808.290 2813.326 2824.056 2830.360 2833.084  
2844.319 2857.628 2867.901 2881.879 2887.669 2895.421 2906.742 2911.793  
2922.199 2926.243 2937.880 2946.650 2960.636 2968.670 2981.568 2985.947



|          |          |          |          |          |          |          |          |
|----------|----------|----------|----------|----------|----------|----------|----------|
| 2996.042 | 2998.808 | 3003.237 | 3017.616 | 3024.652 | 3034.887 | 3046.813 | 3053.063 |
| 3065.621 | 3072.675 | 3081.308 | 3089.466 | 3101.048 | 3104.125 | 3116.976 | 3127.780 |
| 3133.510 | 3141.246 | 3154.627 | 3159.321 | 3172.285 | 3177.638 | 3188.775 | 3196.427 |
| 3207.673 | 3211.261 | 3220.889 | 3231.987 | 3242.299 | 3257.624 | 3268.785 | 3282.010 |
| 3292.517 | 3304.551 | 3317.228 | 3328.258 | 3329.501 | 3340.552 | 3353.765 | 3367.240 |
| 3380.507 | 3394.034 | 3398.236 | 3411.091 | 3419.674 | 3425.981 | 3441.220 | 3450.277 |
| 3454.394 | 3474.897 | 3479.704 | 3493.668 | 3507.421 | 3521.121 | 3525.920 | 3537.050 |
| 3548.078 | 3559.284 | 3570.548 | 3575.340 | 3583.160 | 3591.836 | 3607.520 | 3613.835 |
| 3616.550 | 3631.841 | 3644.114 | 3651.601 | 3665.375 | 3676.969 | 3687.967 | 3700.375 |

**Tolerance (mon)** 9.00 ppm

**Number of Peptides** 455

# Laboratory of Mass Spectrometry and Gaseous Ion Chemistry

## PROWL

- ▶ **ProFound**
- ▶ **ProteinInfo**
- ▶ **PeptideMap**
- ▶ **PepFrag**
- ▶ **X! Tandem**
- ▶ **X! Hunter**
- ▶ **GPMDDB**
- ▶ **PROWL Home**
- ▶ **Chait Lab**



The Rockefeller University  
1230 York Avenue,  
New York, NY 10021  
(212) 327-8000



**National Center for  
Research Resources**

National Resource  
for the Mass Spectrometric  
Analysis of Biological  
Macromolecules

## ProFound



### Protein Candidates

| Rank | Expectation           | Protein Information and Sequence Analyse Tools (T)                                         | %  | pI  | kDa   | R |
|------|-----------------------|--------------------------------------------------------------------------------------------|----|-----|-------|---|
| 1    | 4.6×10 <sup>-16</sup> | gi 6900621 emb CAB71407.1  immunoglobulin heavy chain variable region [Rattus norvegicus]  | 62 | 8.9 | 11.11 | ⊙ |
| 2    | 4.8×10 <sup>-10</sup> | gi 1438517 emb CAA66261.1  T-cell receptor beta chain [Rattus norvegicus]                  | 44 | 9.1 | 12.08 | ⊙ |
| 3    | 2.3×10 <sup>-8</sup>  | gi 7673574 gb AAF66932.1  immunoglobulin heavy chain variable region [Rattus norvegicus]   | 38 | 9.0 | 11.23 | ⊙ |
| 4    | 2.8×10 <sup>-8</sup>  | gi 1166514 gb AAC52369.1  RGS8                                                             | 55 | 8.3 | 7.85  | ⊙ |
| 5    | 7.0×10 <sup>-8</sup>  | gi 23477207 emb CAD38515.1  neuron-specific protein PEP-19 [Rattus norvegicus]             | 28 | 8.8 | 10.88 | ⊙ |
| 6    | 2.8×10 <sup>-5</sup>  | gi 6900569 emb CAB71379.1  immunoglobulin heavy chain variable region [Rattus norvegicus]  | 25 | 8.9 | 12.38 | ⊙ |
| 7    | 7.1×10 <sup>-5</sup>  | gi 8825628 gb AAF80146.1  T cell receptor [Rattus norvegicus]                              | 19 | 8.3 | 11.46 | ⊙ |
| 8    | 7.4×10 <sup>-5</sup>  | gi 46237624 emb CAE84001.1  leukocyte specific transcript 1 [Rattus norvegicus]            | 28 | 8.0 | 13.69 | ⊙ |
| 9    | 8.2×10 <sup>-5</sup>  | gi 6900892 emb CAB71543.1  immunoglobulin heavy chain variable region [Rattus norvegicus]  | 35 | 8.2 | 10.71 | ⊙ |
| 10   | 8.3×10 <sup>-5</sup>  | gi 12018330 ref NP_072156.1  leucocyte specific transcript 1 [Rattus norvegicus]           | 28 | 8.9 | 13.71 | ⊙ |
| 11   | 8.4×10 <sup>-5</sup>  | gi 7673586 gb AAF66938.1  immunoglobulin heavy chain variable region [Rattus norvegicus]   | 29 | 8.3 | 10.66 | ⊙ |
| 12   | 9.5×10 <sup>-5</sup>  | gi 12055416 emb CAC20875.1  immunoglobulin heavy chain variable region [Rattus norvegicus] | 40 | 9.1 | 9.47  | ⊙ |
| 13   | 1.0×10 <sup>-4</sup>  | gi 27545366 ref NP_775421.1  defensin NP-4 precursor [Rattus norvegicus]                   | 20 | 8.1 | 10.43 | ⊙ |
| 14   | 2.0×10 <sup>-4</sup>  | gi 29243397 gb AAO66430.1  beta adducin [Rattus norvegicus]                                | 41 | 9.0 | 4.61  | ⊙ |



|    |                      |                                                                                                               |    |     |       |  |
|----|----------------------|---------------------------------------------------------------------------------------------------------------|----|-----|-------|--|
| 15 | $2.3 \times 10^{-4}$ | gi 6900732 emb CAB71463.1  immunoglobulin heavy chain variable region [Rattus norvegicus]                     | 34 | 8.1 | 11.40 |  |
| 16 | $2.8 \times 10^{-4}$ | gi 37361810 gb AAQ91018.1  LRRGT00062 [Rattus norvegicus]                                                     | 38 | 8.2 | 11.80 |  |
| 17 | $4.0 \times 10^{-4}$ | gi 6900742 emb CAB71468.1  immunoglobulin heavy chain variable region [Rattus norvegicus]                     | 35 | 8.1 | 11.09 |  |
| 18 | $6.1 \times 10^{-4}$ | gi 2144049 pir  I56980 arginine decarboxylase - rat (fragment)                                                | 20 | 9.1 | 9.34  |  |
| 19 | $1.0 \times 10^{-3}$ | gi 13928914 ref NP_113848.1  cyclic AMP phosphoprotein, 19 kDa [Rattus norvegicus]                            | 22 | 9.1 | 12.27 |  |
| 20 | $2.3 \times 10^{-3}$ | gi 7673582 gb AAF66936.1  immunoglobulin heavy chain variable region [Rattus norvegicus]                      | 23 | 9.2 | 9.29  |  |
| 21 | $4.8 \times 10^{-3}$ | gi 5420308 emb CAB46648.1  MHC class I antigen [Rattus norvegicus]                                            | 27 | 8.3 | 8.85  |  |
| 22 | $7.8 \times 10^{-3}$ | gi 6900762 emb CAB71478.1  immunoglobulin heavy chain variable region [Rattus norvegicus]                     | 40 | 8.8 | 10.65 |  |
| 23 | $8.9 \times 10^{-3}$ | gi 6900658 emb CAB71426.1  immunoglobulin heavy chain variable region [Rattus norvegicus]                     | 37 | 8.9 | 11.80 |  |
| 24 | 0.013                | gi 7414613 emb CAB85952.1  immunoglobulin heavy chain variable region [Rattus norvegicus]                     | 37 | 9.0 | 11.53 |  |
| 25 | 0.75                 | gi 1352179 sp P80433 COX82_RAT Cytochrome c oxidase polypeptide VIII-liver (Cytochrome c oxidase subunit 8-2) | 16 | 8.1 | 5.08  |  |

## NOTE:

1. To search again using **unmatched masses**, click the symbol .

**Input Summary**

Search id AE76B943-0BD0-AF3488CC

Sequences 20092

Date &amp; Time Thu Jan 25 23:19:09 2007 UTC (Search Time: 0.28 sec.)

Sample ID

Database NCBI nr [..\databases\nr]

Taxonomy Rattus

Mass Range 1 - 14 kDa

**pI Range** 7.8 -9.2

**Digestion** Trypsin

**Missed Cuts** 1

**Modifications** +C2H3ON@C(Complete); +O@M(Partial);

**Charge State** MH+

**Masses (avg)**

**Tolerance (avg)** 1.00 ppm

**Masses (mon)** 710.445 711.342 714.357 719.343 724.383 726.411 730.367  
734.388 738.347 742.353 747.436 749.404 752.482 754.401  
763.329 768.409 770.386 776.388 778.469 780.403 786.426  
792.453 793.381 799.472 801.394 814.410 820.467 824.497  
826.449 832.433 834.453 836.844 841.481 849.439 850.420  
856.432 857.515 860.451 866.499 876.366 877.482 880.413  
882.430 888.794 889.436 895.424 902.643 903.472 904.443  
907.480 917.496 918.434 921.494 932.471 938.581 941.468  
948.457 949.514 955.493 961.532 962.471 968.533 979.492  
980.523 988.460 990.576 993.500 997.554 1004.471 1018.506  
1019.516 1023.579 1035.517 1038.506 1044.694 1051.599  
1057.563 1062.535 1068.531 1074.521 1077.589 1083.516  
1087.617 1091.548 1097.557 1100.614 1104.635 1107.544  
1113.598 1115.574 1119.511 1125.710 1132.583 1137.502  
1139.568 1145.664 1146.529 1152.643 1163.589 1172.557  
1176.570 1186.608 1190.575 1200.626 1208.614 1215.619  
1216.698 1224.598 1226.553 1233.728 1235.548 1242.631  
1246.548 1253.734 1254.711 1259.602 1267.544 1268.574  
1275.583 1282.514 1286.639 1293.455 1294.568 1298.543  
1302.668 1306.679 1313.622 1317.552 1323.641 1327.562  
1334.707 1339.703 1341.674 1348.487 1355.564 1359.557  
1366.688 1373.589 1375.585 1383.084 1387.543 1394.546  
1395.703 1401.794 1407.672 1414.777 1419.667 1426.649  
1434.770 1442.838 1446.753 1449.673 1462.695 1469.783  
1482.713 1486.707 1500.547 1504.669 1514.896 1515.656  
1520.718 1527.866 1529.892 1534.635 1540.759 1554.715  
1556.786 1564.791 1565.723 1568.654 1576.690 1578.802  
1584.639 1591.963 1592.769 1597.743 1604.827 1605.798  
1608.875 1613.766 1621.726 1623.706 1631.800 1635.636  
1639.914 1642.805 1650.891 1652.724 1660.753 1669.654

|          |          |          |          |          |          |
|----------|----------|----------|----------|----------|----------|
| 1673.728 | 1680.731 | 1684.818 | 1693.645 | 1696.056 | 1698.663 |
| 1703.717 | 1715.826 | 1724.902 | 1725.741 | 1733.861 | 1741.720 |
| 1749.511 | 1750.835 | 1758.732 | 1767.185 | 1767.722 | 1783.639 |
| 1784.862 | 1789.871 | 1793.748 | 1796.800 | 1804.886 | 1805.830 |
| 1809.809 | 1817.896 | 1819.791 | 1828.821 | 1830.895 | 1835.854 |
| 1839.895 | 1847.817 | 1855.872 | 1856.858 | 1868.075 | 1871.161 |
| 1880.931 | 1882.917 | 1890.844 | 1896.821 | 1905.923 | 1914.252 |
| 1916.875 | 1920.916 | 1929.159 | 1931.940 | 1935.967 | 1940.859 |
| 1950.512 | 1953.904 | 1960.875 | 1969.951 | 1976.591 | 1986.904 |
| 1997.905 | 2006.885 | 2010.809 | 2024.208 | 2031.790 | 2041.424 |
| 2045.198 | 2051.904 | 2054.956 | 2063.085 | 2071.106 | 2074.878 |
| 2078.990 | 2093.910 | 2096.654 | 2103.104 | 2109.007 | 2118.450 |
| 2123.847 | 2129.096 | 2137.899 | 2142.137 | 2151.061 | 2153.092 |
| 2162.227 | 2165.171 | 2170.032 | 2182.914 | 2188.047 | 2195.078 |
| 2204.175 | 2207.781 | 2221.061 | 2231.071 | 2234.062 | 2237.152 |
| 2246.272 | 2258.067 | 2267.165 | 2277.118 | 2283.487 | 2293.088 |
| 2296.057 | 2307.949 | 2311.121 | 2320.327 | 2324.092 | 2333.128 |
| 2349.196 | 2354.259 | 2363.714 | 2374.894 | 2394.368 | 2397.071 |
| 2407.305 | 2413.159 | 2416.138 | 2425.053 | 2434.483 | 2436.744 |
| 2440.070 | 2446.996 | 2455.334 | 2466.261 | 2475.335 | 2479.091 |
| 2482.412 | 2494.274 | 2497.236 | 2507.278 | 2510.044 | 2517.103 |
| 2526.169 | 2535.116 | 2539.052 | 2544.112 | 2553.295 | 2563.722 |
| 2567.202 | 2577.384 | 2580.052 | 2590.362 | 2591.631 | 2597.191 |
| 2607.775 | 2610.598 | 2614.799 | 2625.213 | 2627.906 | 2634.471 |
| 2644.474 | 2645.825 | 2655.607 | 2659.149 | 2667.285 | 2677.733 |
| 2682.337 | 2692.396 | 2696.277 | 2707.238 | 2718.959 | 2723.281 |
| 2735.213 | 2745.370 | 2748.195 | 2758.447 | 2759.438 | 2764.218 |
| 2769.286 | 2779.648 | 2791.809 | 2795.656 | 2801.144 | 2811.495 |
| 2821.328 | 2832.791 | 2843.199 | 2847.153 | 2859.497 | 2865.192 |
| 2875.588 | 2878.624 | 2882.746 | 2894.189 | 2907.398 | 2915.032 |
| 2927.158 | 2939.529 | 2949.473 | 2952.401 | 2964.495 | 2968.568 |
| 2978.598 | 2981.173 | 2986.473 | 2995.980 | 3002.622 | 3012.710 |
| 3015.336 | 3020.110 | 3024.371 | 3034.309 | 3036.907 | 3040.027 |
| 3046.271 | 3056.470 | 3060.270 | 3075.384 | 3079.309 | 3092.259 |
| 3105.386 | 3108.992 | 3120.649 | 3126.900 | 3135.044 | 3145.389 |
| 3162.871 | 3174.705 | 3177.553 | 3188.386 | 3199.810 | 3204.919 |
| 3212.705 | 3224.325 | 3231.790 | 3239.263 | 3245.325 | 3256.042 |
| 3262.736 | 3272.865 | 3276.721 | 3287.683 | 3291.973 | 3303.077 |
| 3305.865 | 3313.152 | 3325.885 | 3337.551 | 3341.289 | 3353.841 |



|          |          |          |          |          |          |
|----------|----------|----------|----------|----------|----------|
| 3365.088 | 3378.311 | 3381.836 | 3390.383 | 3393.483 | 3404.087 |
| 3417.663 | 3423.021 | 3436.357 | 3442.363 | 3456.370 | 3459.857 |
| 3465.407 | 3475.567 | 3488.368 | 3498.522 | 3509.848 | 3522.032 |
| 3527.631 | 3539.164 | 3543.654 | 3556.017 | 3559.231 | 3567.154 |
| 3574.601 | 3589.277 | 3603.416 | 3607.704 | 3619.771 | 3624.069 |
| 3628.044 | 3641.284 | 3643.317 | 3658.214 | 3662.289 | 3674.814 |
| 3679.920 | 3689.079 | 3697.840 |          |          |          |

**Tolerance** 16.00 ppm  
**(mon)**

**Number of** 463  
**Peptides**

# Laboratory of Mass Spectrometry and Gaseous Ion Chemistry

## PROWL

- **ProFound**
- **ProteinInfo**
- **PeptideMap**
- **PepFrag**
- **X! Tandem**
- **X! Hunter**
- **GPMDDB**
- **PROWL Home**
- **Chait Lab**

## ProFound



### Protein Candidates

| Rank | Expectation          | Protein Information and Sequence Analyse Tools (T)                                                               | %  | pI  | kDa   | R |
|------|----------------------|------------------------------------------------------------------------------------------------------------------|----|-----|-------|---|
| +1   | 9.5×10 <sup>-7</sup> | gi 223466 prf  0807284A myosin H                                                                                 | 12 | 5.4 | 49.48 | ⊙ |
|      | -                    | gi 205576 gb AAA41653.1  cardiac myosin heavy chain 21/26                                                        | 12 | 5.4 | 49.63 | ⊙ |
|      | -                    | gi 205578 gb AAA41654.1  cardiac myosin heavy chain 5                                                            | 8  | 5.5 | 47.89 | ⊙ |
| +2   | 6.2×10 <sup>-3</sup> | gi 57178 emb CAA33412.1  S-antigen [Rattus norvegicus]                                                           | 10 | 5.9 | 45.26 | ⊙ |
|      | -                    | gi 114219 sp P15887 ARRS_RAT S-arrestin (Retinal S-antigen) (48 kDa protein) (S-AG) (Rod photoreceptor arrestin) | 10 | 5.7 | 45.22 | ⊙ |
|      | -                    | gi 206848 gb AAA42107.1  S-antigen                                                                               | 10 | 6.0 | 45.31 | ⊙ |
| 3    | 0.010                | gi 55778538 gb AAH86386.1  RGD1359202 protein [Rattus norvegicus]                                                | 10 | 6.9 | 41.43 | ⊙ |
| 4    | 0.013                | gi 2773249 gb AAB96759.1  glutamate carboxypeptidase II [Rattus norvegicus]                                      | 9  | 7.4 | 53.07 | ⊙ |
| 5    | 0.038                | gi 57977291 ref NP_071599.2  RSD-6 [Rattus norvegicus]                                                           | 11 | 4.1 | 42.29 | ⊙ |
| 6    | 0.087                | gi 56789535 gb AAH88425.1  Tripartite motif protein 13 [Rattus norvegicus]                                       | 9  | 5.6 | 47.65 | ⊙ |

### NOTE:

1. To search again using **unmatched masses**, click the symbol ⊙.
2. Highly similar protein sequences were given the same rank (click "+" to expand/contract).

### Input Summary

**Search id** B10690A9-08EC-616D27B6

**Sequences** 20073

**Date & Time** Fri Mar 30 19:35:06 2007 UTC (Search Time: 0.36 sec.)

**Sample ID** 20040825 NIA MRich spot 3408 search 20070330 number 1

**Database** NCBI nr [..\databases\nr]

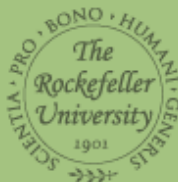

The Rockefeller University  
1230 York Avenue,  
New York, NY 10021  
(212) 327-8000



**National Center for  
Research Resources**

National Resource  
for the Mass Spectrometric  
Analysis of Biological  
Macromolecules

**Taxonomy** Rattus**Mass Range** 30 - 55 kDa**pI Range** 4.0 -8.0**Digestion** Trypsin**Missed Cuts** 0**Modifications** +C2H3ON@C(Complete);**Charge State** MH+**Masses (avg)****Tolerance (avg)** 1.00 ppm

| <b>Masses (mon)</b> | 705.523  | 710.479  | 718.404  | 719.540  | 724.508  | 733.440  | 739.406 |
|---------------------|----------|----------|----------|----------|----------|----------|---------|
|                     | 740.504  | 743.471  | 749.460  | 750.454  | 752.519  | 757.470  | 764.463 |
|                     | 767.422  | 771.470  | 774.461  | 780.574  | 781.439  | 784.412  | 786.466 |
|                     | 792.456  | 798.487  | 804.465  | 813.609  | 814.607  | 818.469  | 820.491 |
|                     | 824.503  | 825.488  | 838.505  | 839.518  | 841.487  | 854.551  | 862.492 |
|                     | 864.489  | 880.482  | 884.538  | 890.529  | 903.483  | 916.592  | 920.506 |
|                     | 933.490  | 934.539  | 943.527  | 949.570  | 954.614  | 961.506  | 967.607 |
|                     | 970.581  | 980.561  | 988.667  | 989.556  | 1002.784 | 1003.552 |         |
|                     | 1013.594 | 1019.557 | 1022.610 | 1025.624 | 1028.556 | 1040.588 |         |
|                     | 1051.687 | 1058.615 | 1060.608 | 1062.581 | 1067.675 | 1086.622 |         |
|                     | 1088.663 | 1091.551 | 1097.562 | 1099.636 | 1102.516 | 1106.474 |         |
|                     | 1112.593 | 1118.526 | 1124.633 | 1133.632 | 1134.516 | 1146.583 |         |
|                     | 1148.543 | 1151.715 | 1154.572 | 1160.639 | 1166.722 | 1169.574 |         |
|                     | 1176.649 | 1186.550 | 1200.825 | 1209.609 | 1216.665 | 1221.505 |         |
|                     | 1228.807 | 1229.633 | 1231.663 | 1238.759 | 1239.659 | 1242.670 |         |
|                     | 1249.536 | 1256.731 | 1258.831 | 1263.683 | 1270.726 | 1273.631 |         |
|                     | 1277.549 | 1284.631 | 1290.741 | 1293.790 | 1298.708 | 1305.533 |         |
|                     | 1312.765 | 1313.765 | 1320.678 | 1327.683 | 1329.694 | 1333.747 |         |
|                     | 1347.745 | 1349.599 | 1354.648 | 1361.693 | 1362.636 | 1368.681 |         |
|                     | 1375.762 | 1376.611 | 1380.784 | 1390.882 | 1391.610 | 1399.758 |         |
|                     | 1403.639 | 1410.936 | 1412.782 | 1417.720 | 1424.749 | 1425.918 |         |
|                     | 1428.766 | 1436.767 | 1438.783 | 1445.404 | 1453.861 | 1455.761 |         |
|                     | 1462.730 | 1464.635 | 1471.883 | 1484.746 | 1487.705 | 1494.776 |         |
|                     | 1498.864 | 1505.726 | 1515.721 | 1519.865 | 1527.775 | 1529.802 |         |
|                     | 1535.916 | 1541.726 | 1543.868 | 1546.805 | 1553.776 | 1555.820 |         |
|                     | 1558.822 | 1565.980 | 1567.819 | 1569.792 | 1577.056 | 1581.015 |         |
|                     | 1582.889 | 1585.837 | 1592.761 | 1594.858 | 1597.816 | 1599.808 |         |
|                     | 1606.979 | 1607.789 | 1616.005 | 1617.440 | 1625.166 | 1625.818 |         |

|          |          |          |          |          |          |
|----------|----------|----------|----------|----------|----------|
| 1627.936 | 1635.959 | 1643.947 | 1645.749 | 1654.255 | 1655.925 |
| 1664.896 | 1672.790 | 1675.765 | 1683.767 | 1684.762 | 1688.771 |
| 1697.942 | 1707.750 | 1724.904 | 1731.818 | 1739.869 | 1741.021 |
| 1744.815 | 1753.038 | 1754.842 | 1756.817 | 1764.983 | 1766.765 |
| 1771.807 | 1783.929 | 1788.767 | 1797.977 | 1801.862 | 1810.390 |
| 1810.906 | 1811.851 | 1820.000 | 1824.743 | 1828.801 | 1836.902 |
| 1839.905 | 1844.905 | 1857.914 | 1859.917 | 1869.891 | 1872.862 |
| 1881.966 | 1890.944 | 1898.947 | 1916.182 | 1919.957 | 1924.769 |
| 1933.050 | 1936.871 | 1940.904 | 1948.952 | 1955.588 | 1962.891 |
| 1972.121 | 1982.722 | 1991.668 | 1993.922 | 2006.029 | 2016.903 |
| 2025.228 | 2029.990 | 2035.029 | 2040.958 | 2048.053 | 2052.811 |
| 2059.009 | 2067.820 | 2072.999 | 2096.399 | 2105.073 | 2112.063 |
| 2122.972 | 2134.998 | 2140.635 | 2147.839 | 2151.086 | 2160.029 |
| 2170.120 | 2181.776 | 2184.073 | 2192.012 | 2195.009 | 2201.041 |
| 2219.945 | 2222.199 | 2231.607 | 2238.230 | 2258.030 | 2260.207 |
| 2270.016 | 2273.066 | 2282.163 | 2291.117 | 2295.149 | 2309.142 |
| 2315.199 | 2336.216 | 2346.972 | 2351.641 | 2355.071 | 2357.197 |
| 2367.346 | 2378.469 | 2388.927 | 2395.121 | 2398.979 | 2409.548 |
| 2411.136 | 2414.974 | 2420.340 | 2430.491 | 2433.148 | 2440.297 |
| 2448.290 | 2457.297 | 2471.242 | 2476.100 | 2480.023 | 2493.157 |
| 2503.190 | 2505.954 | 2509.395 | 2519.292 | 2523.250 | 2529.411 |
| 2540.366 | 2549.406 | 2554.340 | 2565.383 | 2580.315 | 2585.210 |
| 2595.290 | 2598.964 | 2612.237 | 2623.404 | 2631.968 | 2640.477 |
| 2654.515 | 2658.404 | 2666.260 | 2677.367 | 2681.028 | 2692.691 |
| 2696.118 | 2705.220 | 2716.480 | 2723.119 | 2734.169 | 2737.340 |
| 2746.441 | 2758.847 | 2764.477 | 2768.338 | 2775.893 | 2783.743 |
| 2793.633 | 2795.841 | 2801.258 | 2814.216 | 2821.547 | 2825.019 |
| 2833.225 | 2839.360 | 2851.974 | 2863.030 | 2876.816 | 2882.383 |
| 2890.490 | 2903.398 | 2913.317 | 2920.994 | 2936.452 | 2941.967 |
| 2951.915 | 2955.869 | 2966.757 | 2976.599 | 2987.193 | 2997.401 |
| 3002.789 | 3006.223 | 3016.278 | 3027.684 | 3037.886 | 3040.931 |
| 3050.263 | 3062.666 | 3065.313 | 3076.363 | 3080.325 | 3091.289 |
| 3093.837 | 3096.760 | 3107.491 | 3110.609 | 3122.003 | 3126.635 |
| 3137.719 | 3143.722 | 3153.020 | 3164.378 | 3172.986 | 3178.528 |
| 3187.574 | 3201.433 | 3206.428 | 3220.404 | 3231.346 | 3234.525 |
| 3238.396 | 3243.726 | 3255.284 | 3259.244 | 3263.784 | 3275.609 |
| 3279.735 | 3292.632 | 3304.122 | 3315.554 | 3318.386 | 3329.765 |
| 3341.085 | 3345.720 | 3354.648 | 3367.692 | 3374.692 | 3384.952 |
| 3392.244 | 3408.505 | 3414.289 | 3428.629 | 3442.209 | 3454.747 |

3470.323 3474.570 3487.246 3499.706 3512.906 3524.292  
3532.774 3545.875 3594.808 3609.602 3621.182 3636.598  
3651.679 3656.116 3674.584 3692.280 3699.731

**Tolerance** 10.00 ppm  
**(mon)**

**Number of** 426  
**Peptides**



# Laboratory of Mass Spectrometry and Gaseous Ion Chemistry

## PROWL

- ▶ **ProFound**
- ▶ **ProteinInfo**
- ▶ **PeptideMap**
- ▶ **PepFrag**
- ▶ **X! Tandem**
- ▶ **X! Hunter**
- ▶ **GPMDDB**
- ▶ **PROWL Home**
- ▶ **Chait Lab**

## ProFound



### Protein Candidates

| Rank | Expectation           | Protein Information and Sequence Analyse Tools (T)                                                                                                                               | %  | pI  | kDa   | R |
|------|-----------------------|----------------------------------------------------------------------------------------------------------------------------------------------------------------------------------|----|-----|-------|---|
| +1   | 5.9×10 <sup>-21</sup> | gi 21730241 pdb 1GVE B Chain B, Aflatoxin Aldehyde Reductase (Akr7a1) From Rat Liver                                                                                             | 20 | 6.6 | 37.08 | ⊙ |
|      | -                     | gi 433611 emb CAA52740.1  aflatoxin B1 aldehyde reductase [Rattus norvegicus]                                                                                                    | 20 | 6.8 | 37.12 | ⊙ |
|      | -                     | gi 21730240 pdb 1GVE A Chain A, Aflatoxin Aldehyde Reductase (Akr7a1) From Rat Liver                                                                                             | 20 | 7.2 | 37.21 | ⊙ |
|      | -                     | gi 7106240 ref NP_037347.1  aldo-keto reductase family 7, member A3 (aflatoxin aldehyde reductase) [Rattus norvegicus]                                                           | 20 | 6.8 | 37.13 | ⊙ |
|      | -                     | gi 51261212 gb AAH78872.1  Afar protein [Rattus norvegicus]                                                                                                                      | 14 | 6.8 | 39.16 | ⊙ |
| 2    | 2.2×10 <sup>-16</sup> | gi 56605744 ref NP_001008334.1  hypothetical protein LOC302032 [Rattus norvegicus]                                                                                               | 22 | 6.4 | 24.13 | ⊙ |
| +3   | 7.3×10 <sup>-16</sup> | gi 1584427 prf  2123218B corticoliberin-binding protein                                                                                                                          | 13 | 6.1 | 36.72 | ⊙ |
|      | -                     | gi 117444 sp P24388 CRHBP_RAT Corticotropin-releasing factor-binding protein precursor (CRF-binding protein) (CRF-BP) (Corticotropin-releasing hormone-binding protein) (CRH-BP) | 13 | 6.1 | 36.73 | ⊙ |
|      | -                     | gi 21070952 ref NP_631922.1  corticotropin releasing hormone binding protein [Rattus norvegicus]                                                                                 | 13 | 6.1 | 36.76 | ⊙ |
| 4    | 9.0×10 <sup>-16</sup> | gi 57114348 ref NP_001008877.1  Ac1254 [Rattus norvegicus]                                                                                                                       | 9  | 5.2 | 34.82 | ⊙ |
| 5    | 2.1×10 <sup>-14</sup> | gi 13540671 ref NP_110481.1  leukocyte cell derived chemotaxin 1 [Rattus norvegicus]                                                                                             | 14 | 6.0 | 38.00 | ⊙ |
| 6    | 6.4×10 <sup>-14</sup> | gi 35215315 ref NP_877400.1  putative C3orf6 protein [Rattus norvegicus]                                                                                                         | 10 | 6.4 | 35.31 | ⊙ |
| 7    | 7.2×10 <sup>-14</sup> | gi 50927559 gb AAH78713.1  Cyp4f6 protein [Rattus norvegicus]                                                                                                                    | 12 | 5.8 | 40.34 | ⊙ |
| +8   | 3.0×10 <sup>-11</sup> | gi 56789141 gb AAH88125.1  Sulfotransferase family, cytosolic, 1C, member 1 [Rattus norvegicus]                                                                                  | 13 | 6.1 | 35.87 | ⊙ |

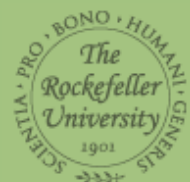

The Rockefeller University  
1230 York Avenue,  
New York, NY 10021  
(212) 327-8000



**National Center for  
Research Resources**

National Resource  
for the Mass Spectrometric  
Analysis of Biological  
Macromolecules

|    |                       |                                                                                                                                  |    |     |       |   |
|----|-----------------------|----------------------------------------------------------------------------------------------------------------------------------|----|-----|-------|---|
|    | -                     | gi 13929030 ref NP_113920.1  sulfotransferase family 1A, member 2 [Rattus norvegicus]                                            | 13 | 6.1 | 35.86 | 🔴 |
| 9  | 4.9×10 <sup>-11</sup> | gi 34875668 ref XP_237115.2  PREDICTED: similar to non-catalytic region of tyrosine kinase adaptor protein 2 [Rattus norvegicus] | 7  | 6.5 | 43.12 | 🔴 |
| 10 | 4.2×10 <sup>-9</sup>  | gi 395067 emb CAA52117.1  amiloride binding protein (short form) [Rattus norvegicus]                                             | 12 | 5.9 | 25.56 | 🔴 |
| 11 | 7.0×10 <sup>-9</sup>  | gi 49175746 gb AAT52165.1  fos-related 2 [Rattus norvegicus]                                                                     | 10 | 7.0 | 35.41 | 🔴 |
| 12 | 1.8×10 <sup>-8</sup>  | gi 2627162 dbj BAA23524.1  Truncated TSH receptor [Rattus sordidus]                                                              | 9  | 7.0 | 26.66 | 🔴 |
| 13 | 4.0×10 <sup>-8</sup>  | gi 38146389 gb AAR11567.1  cardiotrophin-like cytokine [Rattus norvegicus]                                                       | 9  | 6.9 | 20.63 | 🔴 |
| 14 | 4.5×10 <sup>-8</sup>  | gi 47577411 ref NP_001000290.1  olfactory receptor Olr454 [Rattus norvegicus]                                                    | 5  | 5.3 | 35.27 | 🔴 |
| 15 | 7.1×10 <sup>-8</sup>  | gi 8394076 ref NP_058979.1  proteasome (prosome, macropain) subunit, alpha type 6 [Rattus norvegicus]                            | 9  | 6.3 | 27.84 | 🔴 |
| 16 | 7.9×10 <sup>-8</sup>  | gi 2582497 gb AAB82567.1  caspase 2 [Rattus norvegicus]                                                                          | 18 | 6.0 | 29.21 | 🔴 |
| 17 | 1.2×10 <sup>-7</sup>  | gi 16758368 ref NP_446041.1  RAB14, member RAS oncogene family [Rattus norvegicus]                                               | 13 | 5.8 | 24.14 | 🔴 |
| 18 | 1.2×10 <sup>-7</sup>  | gi 420272 pir  E42148 GTP-binding protein rab14 - rat                                                                            | 13 | 5.8 | 24.08 | 🔴 |
| 19 | 1.4×10 <sup>-7</sup>  | gi 554486 gb AAA41864.1  protein kinase C type III                                                                               | 16 | 7.3 | 29.82 | 🔴 |
| 20 | 1.4×10 <sup>-7</sup>  | gi 19745164 ref NP_604444.1  protein kinase C, delta binding protein [Rattus norvegicus]                                         | 17 | 5.8 | 27.89 | 🔴 |
| 21 | 1.7×10 <sup>-7</sup>  | gi 40786457 ref NP_955411.1  hypothetical protein LOC294311 [Rattus norvegicus]                                                  | 12 | 6.3 | 40.12 | 🔴 |
| 22 | 1.9×10 <sup>-7</sup>  | gi 6981322 ref NP_036853.1  purinergic receptor P2X-like 1 [Rattus norvegicus]                                                   | 9  | 6.5 | 43.12 | 🔴 |
| 23 | 5.0×10 <sup>-7</sup>  | gi 33086532 gb AAP92578.1  Ab2-093 [Rattus norvegicus]                                                                           | 6  | 6.8 | 43.57 | 🔴 |
| 24 | 5.1×10 <sup>-7</sup>  | gi 31324556 ref NP_852143.1  retinol dehydrogenase 10 (all-trans) [Rattus norvegicus]                                            | 8  | 7.2 | 38.73 | 🔴 |
| 25 | 5.4×10 <sup>-7</sup>  | gi 51948530 ref NP_001004280.1  hypothetical protein LOC362134 [Rattus norvegicus]                                               | 9  | 5.1 | 33.55 | 🔴 |

|    |                      |                                                                                                                                                 |    |     |       |   |
|----|----------------------|-------------------------------------------------------------------------------------------------------------------------------------------------|----|-----|-------|---|
| 26 | $7.8 \times 10^{-7}$ | gi 38454226 ref NP_942039.1  tumor protein D52-like 2 [Rattus norvegicus]                                                                       | 9  | 5.8 | 24.03 | 🔴 |
| 27 | $8.9 \times 10^{-7}$ | gi 2143731 pir  JC4845 G protein-activated inward rectifier potassium channel chain - rat                                                       | 8  | 5.2 | 43.02 | 🔴 |
| 28 | $1.1 \times 10^{-6}$ | gi 34328540 ref NP_899159.1  cathepsin Y [Rattus norvegicus]                                                                                    | 7  | 6.8 | 34.86 | 🔴 |
| 29 | $1.2 \times 10^{-6}$ | gi 38194517 gb AAR13265.1  GP49B2 [Rattus norvegicus]                                                                                           | 7  | 6.3 | 38.72 | 🔴 |
| 30 | $1.4 \times 10^{-6}$ | gi 54035313 gb AAH83808.1  Similar to Nuclear autoantigen Sp-100 (Speckled 100 kDa) (Nuclear dot-associated Sp100 protein) [Rattus norvegicus]  | 8  | 5.3 | 38.61 | 🔴 |
| 31 | $1.4 \times 10^{-6}$ | gi 5669929 gb AAD46521.1 AF154914_1 cyclin H [Rattus norvegicus]                                                                                | 8  | 7.1 | 38.05 | 🔴 |
| 32 | $1.6 \times 10^{-6}$ | gi 19865045 sp Q9R1A0 CCNH_RAT Cyclin-H                                                                                                         | 8  | 6.7 | 38.05 | 🔴 |
| 33 | $1.8 \times 10^{-6}$ | gi 31542350 ref NP_443213.2  cyclin H [Rattus norvegicus]                                                                                       | 8  | 7.1 | 38.13 | 🔴 |
| 34 | $2.7 \times 10^{-6}$ | gi 38541353 gb AAH62058.1  Ckm protein [Rattus norvegicus]                                                                                      | 4  | 6.6 | 43.26 | 🔴 |
| 35 | $2.8 \times 10^{-6}$ | gi 9296968 sp P82471 GNAO_RAT Guanine nucleotide-binding protein G(q) subunit alpha (Guanine nucleotide-binding protein alpha-q)                | 9  | 5.6 | 41.74 | 🔴 |
| 36 | $3.0 \times 10^{-6}$ | gi 6978661 ref NP_036662.1  creatine kinase, muscle [Rattus norvegicus]                                                                         | 4  | 6.6 | 43.23 | 🔴 |
| 37 | $3.2 \times 10^{-6}$ | gi 13591957 ref NP_112298.1  guanine nucleotide binding protein, alpha q polypeptide [Rattus norvegicus]                                        | 9  | 5.5 | 42.41 | 🔴 |
| 38 | $3.3 \times 10^{-6}$ | gi 34873464 ref XP_213437.2  PREDICTED: similar to Speckle-type POZ protein (PDX-1 C-terminal-interacting factor 1) (PCIF1) [Rattus norvegicus] | 8  | 5.6 | 42.86 | 🔴 |
| 39 | $3.5 \times 10^{-6}$ | gi 55742832 ref NP_077069.3  annexin A4 [Rattus norvegicus]                                                                                     | 7  | 5.4 | 36.22 | 🔴 |
| 40 | $3.5 \times 10^{-6}$ | gi 37999910 sp P55260 ANXA4_RAT Annexin A4 (Annexin IV) (Lipocortin IV) (36 kDa zymogen granule membrane-associated protein) (ZAP36)            | 7  | 5.3 | 36.17 | 🔴 |
| 41 | $3.5 \times 10^{-6}$ | gi 19705473 ref NP_599199.1  2-amino-3-carboxymuconate-6-semialdehyde decarboxylase [Rattus norvegicus]                                         | 9  | 6.0 | 38.47 | 🔴 |
| 42 | $3.6 \times 10^{-6}$ | gi 38303943 gb AAH62016.1  RAB4A, member RAS oncogene family [Rattus norvegicus]                                                                | 13 | 5.8 | 24.68 | 🔴 |
| 43 | $3.8 \times 10^{-6}$ | gi 27545370 ref NP_775423.1  preprotrypsinogen IV [Rattus norvegicus]                                                                           | 17 | 6.4 | 27.24 | 🔴 |

|    |                      |                                                                                                                                                                           |    |     |       |  |
|----|----------------------|---------------------------------------------------------------------------------------------------------------------------------------------------------------------------|----|-----|-------|--|
| 44 | $4.3 \times 10^{-6}$ | <a href="#">gi 37361894 gb AAQ91060.1</a>   LRRGT00104 [Rattus norvegicus]                                                                                                | 6  | 6.8 | 40.22 |  |
| 45 | $4.5 \times 10^{-6}$ | <a href="#">gi 19386562 gb AAL86569.1</a>   vesicular protein vp-165 short isoform [Rattus norvegicus]                                                                    | 11 | 5.2 | 38.83 |  |
| 46 | $5.1 \times 10^{-6}$ | <a href="#">gi 47168483 pdb 1OT7 A</a> Chain A, Structural Basis For 3-Deoxy-Cdca Binding And Activation Of Fxr                                                           | 15 | 5.2 | 26.87 |  |
| 47 | $5.8 \times 10^{-6}$ | <a href="#">gi 8393962 ref NP_058927.1</a>   phosphatidylinositol transfer protein [Rattus norvegicus]                                                                    | 8  | 6.0 | 32.12 |  |
| 48 | $6.1 \times 10^{-6}$ | <a href="#">gi 3452564 dbj BAA32479.1</a>   Vesl-2(delta 11) [Rattus norvegicus]                                                                                          | 9  | 6.0 | 39.61 |  |
| 49 | $7.3 \times 10^{-6}$ | <a href="#">gi 1122946 gb AAC52330.1</a>   arylalkylamine N-acetyltransferase                                                                                             | 21 | 6.8 | 20.08 |  |
| 50 | $7.9 \times 10^{-6}$ | <a href="#">gi 34866299 ref XP_232664.2</a>   PREDICTED: similar to p47 protein isoform a [Rattus norvegicus]                                                             | 9  | 5.1 | 37.11 |  |
| 51 | $1.0 \times 10^{-5}$ | <a href="#">gi 56090449 ref NP_001007716.1</a>   RIB43A domain with coiled-coils 1 [Rattus norvegicus]                                                                    | 7  | 6.5 | 44.75 |  |
| 52 | $1.1 \times 10^{-5}$ | <a href="#">gi 12700185 gb AAG38402.1</a>   recombination activating protein 1 [Rattus norvegicus]                                                                        | 9  | 5.7 | 29.27 |  |
| 53 | $1.6 \times 10^{-5}$ | <a href="#">gi 12831221 ref NP_075589.1</a>   vesicle transport through interaction with t-SNAREs homolog 1A [Rattus norvegicus]                                          | 5  | 6.1 | 25.14 |  |
| 54 | $1.6 \times 10^{-5}$ | <a href="#">gi 13124592 sp Q9JI51 VTI1A_RAT</a> Vesicle transport through interaction with t-SNAREs homolog 1A (Vesicle transport v-SNARE protein Vti1-like 2) (Vti1-rp2) | 5  | 6.1 | 26.02 |  |
| 55 | $1.8 \times 10^{-5}$ | <a href="#">gi 55778322 gb AAH86609.1</a>   LOC360912 protein [Rattus norvegicus]                                                                                         | 14 | 5.2 | 34.41 |  |
| 56 | $2.4 \times 10^{-5}$ | <a href="#">gi 25453349 sp Q8VDA5 ZBP1_RAT</a> Z-DNA-binding protein 1 (Tumor stroma and activated macrophage protein DLM-1)                                              | 6  | 5.3 | 44.24 |  |
| 57 | $2.4 \times 10^{-5}$ | <a href="#">gi 34860868 ref XP_342595.1</a>   PREDICTED: similar to Z-DNA binding protein 1 (Tumor stroma and activated macrophage protein DLM-1) [Rattus norvegicus]     | 6  | 5.3 | 44.21 |  |
| 58 | $3.3 \times 10^{-5}$ | <a href="#">gi 50927681 gb AAH79000.1</a>   Germ cell associated 1 [Rattus norvegicus]                                                                                    | 7  | 5.7 | 41.34 |  |
| 59 | $3.4 \times 10^{-5}$ | <a href="#">gi 28396191 gb AAO39003.1</a>   HOMER1G [Rattus norvegicus]                                                                                                   | 9  | 5.1 | 21.97 |  |
| 60 | $6.7 \times 10^{-5}$ | <a href="#">gi 33086580 gb AAP92602.1</a>   Ab2-305 [Rattus norvegicus]                                                                                                   | 9  | 6.1 | 43.78 |  |

|    |                      |                                                                                                                                           |    |     |       |  |
|----|----------------------|-------------------------------------------------------------------------------------------------------------------------------------------|----|-----|-------|--|
| 61 | $8.7 \times 10^{-5}$ | <a href="#">gi 57526957 ref NP_001009603.1 </a> aspartoacylase-3 [Rattus norvegicus]                                                      | 12 | 5.4 | 35.80 |  |
| 62 | $1.9 \times 10^{-4}$ | <a href="#">gi 729113 sp P39948 CCND1_RAT</a> G1/S-specific cyclin-D1                                                                     | 7  | 5.0 | 34.26 |  |
| 63 | $1.9 \times 10^{-4}$ | <a href="#">gi 31377523 ref NP_741989.2 </a> cyclin D1 [Rattus norvegicus]                                                                | 7  | 5.1 | 34.20 |  |
| 64 | $3.0 \times 10^{-4}$ | <a href="#">gi 3834625 gb AAC71031.1 </a> homer-1b [Rattus norvegicus]                                                                    | 5  | 5.3 | 40.22 |  |
| 65 | $3.4 \times 10^{-4}$ | <a href="#">gi 13928988 ref NP_113895.1 </a> homer homolog 1 [Rattus norvegicus]                                                          | 5  | 5.4 | 41.40 |  |
| 66 | $3.9 \times 10^{-4}$ | <a href="#">gi 3452560 dbj BAA32477.1 </a> Vesl-1L [Rattus norvegicus]                                                                    | 5  | 5.5 | 41.44 |  |
| 67 | $4.4 \times 10^{-4}$ | <a href="#">gi 48927599 dbj BAD23894.1 </a> Down-regulated in nephrectomized rat kidney #1 [Rattus norvegicus]                            | 7  | 7.0 | 32.27 |  |
| 68 | $5.3 \times 10^{-4}$ | <a href="#">gi 18426822 ref NP_569088.1 </a> serine (or cysteine) proteinase inhibitor, clade B (ovalbumin), member 7 [Rattus norvegicus] | 5  | 7.1 | 43.03 |  |
| 69 | $8.4 \times 10^{-3}$ | <a href="#">gi 27702700 ref XP_215785.1 </a> PREDICTED: similar to APAF1 interacting protein [Rattus norvegicus]                          | 13 | 6.5 | 27.61 |  |

## NOTE:

1. To search again using **unmatched masses**, click the symbol .
2. Highly similar protein sequences were given the same rank (click "+" to expand/contract).

**Input Summary****Search id** AF22B88E-0ACC-5F8D25D6**Sequences** 20073**Date & Time** Mon Apr 02 17:25:57 2007 UTC (Search Time: 0.34 sec.)**Sample ID** 20040825 NIA MRich spot 5209 search 20070402 number 2**Database** NCBI nr [..\databases\nr]**Taxonomy** Rattus**Mass Range** 17 - 45 kDa**pI Range** 5.0 -7.5**Digestion** Trypsin**Missed Cuts** 0**Modifications** +C2H3ON@C(Complete); +O@M(Partial);**Charge State** MH+**Masses (avg)**

**Tolerance (avg)** 1.00 ppm

**Masses (mon)** 706.386 711.415 712.276 718.425 722.431 726.358 731.458  
740.468 743.453 748.447 750.490 754.419 757.450 762.473  
768.538 774.383 778.486 784.407 791.466 796.505 803.371  
804.457 811.453 817.498 819.518 824.511 831.458 838.044  
838.550 840.499 850.550 858.511 864.512 874.526 878.528  
888.503 891.573 893.502 903.582 904.513 917.484 918.523  
922.564 932.724 933.464 934.533 946.559 948.567 958.516  
964.565 975.584 981.623 982.614 986.476 992.613 1002.513  
1004.516 1018.894 1019.560 1020.570 1023.602 1029.616  
1030.609 1041.587 1042.608 1051.620 1053.585 1060.605  
1061.592 1065.629 1068.639 1085.951 1086.572 1087.592  
1090.678 1093.657 1100.588 1102.598 1106.645 1110.609  
1116.627 1122.592 1123.562 1132.623 1135.614 1138.631  
1144.633 1148.552 1150.582 1156.683 1160.600 1165.717  
1169.579 1176.700 1183.658 1191.635 1194.609 1197.635  
1209.001 1209.703 1211.670 1215.561 1221.621 1228.640  
1231.637 1233.716 1240.864 1241.670 1242.642 1249.745  
1251.720 1253.721 1260.712 1261.715 1268.728 1271.702  
1284.669 1285.731 1289.715 1292.713 1303.794 1304.766  
1307.709 1310.704 1317.681 1318.708 1321.715 1324.702  
1331.667 1334.664 1338.724 1345.849 1348.591 1352.771  
1359.735 1362.715 1372.645 1374.691 1390.682 1398.674  
1402.704 1406.765 1413.792 1414.703 1422.612 1429.779  
1432.733 1434.771 1442.711 1444.731 1451.800 1454.751  
1462.745 1464.754 1469.833 1472.750 1479.784 1486.731  
1493.721 1500.752 1515.757 1522.709 1526.756 1533.629  
1534.709 1540.833 1543.794 1551.022 1551.738 1554.762  
1560.793 1567.741 1568.808 1571.768 1578.821 1579.784  
1588.786 1595.797 1599.752 1607.813 1616.786 1618.817  
1623.804 1628.826 1637.831 1646.724 1650.797 1654.793  
1658.766 1662.826 1671.842 1674.816 1683.781 1688.813  
1698.925 1701.868 1705.897 1712.855 1726.842 1733.900  
1741.954 1749.999 1752.845 1761.876 1764.816 1772.857  
1782.821 1783.987 1787.942 1792.870 1796.806 1805.892  
1808.898 1817.068 1817.814 1826.206 1827.760 1831.936  
1846.864 1855.003 1856.918 1863.946 1866.912 1874.920  
1876.903 1882.888 1892.863 1899.959 1910.009 1912.894  
1922.949 1929.923 1937.889 1940.913 1948.901 1957.858

|          |          |          |          |          |          |
|----------|----------|----------|----------|----------|----------|
| 1962.986 | 1985.004 | 1994.074 | 2003.768 | 2009.952 | 2014.966 |
| 2026.893 | 2032.019 | 2043.053 | 2052.011 | 2056.131 | 2057.933 |
| 2066.740 | 2070.078 | 2093.120 | 2098.978 | 2102.187 | 2105.925 |
| 2111.119 | 2115.020 | 2121.032 | 2130.004 | 2135.043 | 2144.169 |
| 2147.008 | 2151.035 | 2160.008 | 2161.948 | 2166.993 | 2182.161 |
| 2184.143 | 2187.984 | 2192.050 | 2194.888 | 2204.079 | 2206.040 |
| 2221.058 | 2230.112 | 2238.293 | 2248.118 | 2258.219 | 2262.093 |
| 2266.195 | 2275.084 | 2282.124 | 2291.174 | 2295.076 | 2308.227 |
| 2311.140 | 2315.156 | 2324.206 | 2337.114 | 2350.057 | 2353.062 |
| 2355.055 | 2366.148 | 2379.139 | 2383.215 | 2393.220 | 2404.204 |
| 2420.182 | 2434.018 | 2437.242 | 2447.427 | 2450.061 | 2455.198 |
| 2470.071 | 2481.096 | 2494.265 | 2510.268 | 2525.240 | 2536.354 |
| 2539.272 | 2551.131 | 2569.159 | 2582.046 | 2590.198 | 2597.197 |
| 2617.006 | 2626.248 | 2638.309 | 2643.224 | 2654.421 | 2665.190 |
| 2672.323 | 2678.455 | 2692.976 | 2705.364 | 2709.325 | 2719.326 |
| 2721.223 | 2734.099 | 2748.064 | 2761.427 | 2766.243 | 2778.337 |
| 2789.212 | 2799.467 | 2802.639 | 2811.097 | 2817.136 | 2827.800 |
| 2832.458 | 2845.846 | 2848.433 | 2859.264 | 2865.283 | 2872.318 |
| 2882.435 | 2893.366 | 2896.302 | 2906.207 | 2918.384 | 2931.134 |
| 2935.402 | 2942.304 | 2952.543 | 2964.523 | 2970.211 | 2980.572 |
| 2989.073 | 2999.282 | 3004.486 | 3011.357 | 3021.197 | 3026.457 |
| 3030.498 | 3042.152 | 3049.475 | 3059.340 | 3071.087 | 3075.344 |
| 3086.522 | 3089.704 | 3093.412 | 3104.511 | 3110.480 | 3116.306 |
| 3126.279 | 3139.511 | 3144.495 | 3151.751 | 3157.918 | 3161.476 |
| 3173.190 | 3177.365 | 3188.499 | 3199.538 | 3205.560 | 3216.514 |
| 3228.213 | 3233.458 | 3246.378 | 3258.747 | 3264.863 | 3276.303 |
| 3282.898 | 3287.222 | 3291.394 | 3306.442 | 3315.006 | 3326.805 |
| 3338.430 | 3350.115 | 3353.741 | 3369.165 | 3380.276 | 3392.385 |
| 3404.439 | 3423.760 | 3454.327 | 3462.486 | 3507.289 | 3516.626 |
| 3520.022 | 3530.377 | 3543.032 | 3546.801 | 3563.825 | 3577.224 |
| 3580.285 | 3599.327 | 3605.592 | 3617.772 | 3634.315 | 3640.203 |
| 3652.360 | 3665.311 | 3676.570 | 3691.159 | 3695.864 |          |

**Tolerance** 8.00 ppm  
**(mon)**

**Number of** 427  
**Peptides**

PROWL

## ProFound

- [ProFound](#)
- [ProteinInfo](#)
- [PeptideMap](#)
- [PepFrag](#)
- [X! Tandem](#)
- [X! Hunter](#)
- [GPMDB](#)
- [PROWL Home](#)
- [Chait Lab](#)

The Rockefeller  
University

The Rockefeller University  
1230 York Avenue,  
New York, NY 10021  
(212) 327-8000

National Center of  
Research Resources

National Resource  
for the Mass Spectrometric  
Analysis of Biological  
Macromolecules

## Protein Candidates

| Rank | Expectation           | Protein Information and Sequence Analyse Tools (T)                                                                                                                             | %                  | pI  | kDa   | R                        |
|------|-----------------------|--------------------------------------------------------------------------------------------------------------------------------------------------------------------------------|--------------------|-----|-------|--------------------------|
| 1    | 4.2×10 <sup>-13</sup> | <a href="#">gi 6940826 gb AAF31764.1 AF130338_1</a> beta-1 adducin [Rattus norvegicus]                                                                                         | <a href="#">36</a> | 4.9 | 20.99 | <input type="checkbox"/> |
| 2    | 7.3×10 <sup>-7</sup>  | <a href="#">gi 2144103 pir  I51903</a> type I interleukin-1 receptor - rat (fragment)                                                                                          | <a href="#">26</a> | 4.9 | 19.74 | <input type="checkbox"/> |
| +3   | 1.4×10 <sup>-6</sup>  | <a href="#">gi 203361 gb AAA40891.1</a> clathryn light chain (LCB3)                                                                                                            | <a href="#">14</a> | 4.6 | 23.22 | <input type="checkbox"/> |
|      | -                     | <a href="#">gi 16758690 ref NP_446287.1</a> clathrin, light polypeptide (Lcb) [Rattus norvegicus]                                                                              | <a href="#">13</a> | 4.6 | 25.21 | <input type="checkbox"/> |
| 4    | 1.3×10 <sup>-4</sup>  | <a href="#">gi 7547027 gb AAF63763.1 AF250032_1</a> agrin precursor [Rattus norvegicus]                                                                                        | <a href="#">19</a> | 5.0 | 16.01 | <input type="checkbox"/> |
| 5    | 4.1×10 <sup>-4</sup>  | <a href="#">gi 12964662 dbj BAB32668.1</a> branched-chain alpha-keto acid dihydrolipoyl acyltransferase [Rattus norvegicus]                                                    | <a href="#">22</a> | 5.2 | 20.82 | <input type="checkbox"/> |
| 6    | 6.1×10 <sup>-4</sup>  | <a href="#">gi 2674183 gb AAB88701.1</a> kinesin-related protein KRP4 [Rattus norvegicus]                                                                                      | <a href="#">26</a> | 4.9 | 17.12 | <input type="checkbox"/> |
| 7    | 9.6×10 <sup>-4</sup>  | <a href="#">gi 755583 gb AAC52590.1</a> C-CAM4                                                                                                                                 | <a href="#">18</a> | 5.6 | 16.00 | <input type="checkbox"/> |
| 8    | 9.6×10 <sup>-4</sup>  | <a href="#">gi 27545443 ref NP_775461.1</a> CEA-related cell adhesion molecule 10 [Rattus norvegicus]                                                                          | <a href="#">18</a> | 5.6 | 16.10 | <input type="checkbox"/> |
| 9    | 1.3×10 <sup>-3</sup>  | <a href="#">gi 2326257 dbj BAA21777.1</a> growth hormone secretagogue receptor type 1a [Rattus norvegicus]                                                                     | <a href="#">17</a> | 5.2 | 27.31 | <input type="checkbox"/> |
| 10   | 1.4×10 <sup>-3</sup>  | <a href="#">gi 7766811 pdb 1CK4 A</a> Chain A, Crystal Structure Of Rat A1b1 Integrin I-Domain.                                                                                | <a href="#">17</a> | 5.3 | 22.19 | <input type="checkbox"/> |
| 11   | 1.4×10 <sup>-3</sup>  | <a href="#">gi 30749469 pdb 1MHP A</a> Chain A, Crystal Structure Of A Chimeric Alpha1 Integrin I-Domain In Complex With The Fab Fragment Of A Humanized Neutralizing Antibody | <a href="#">18</a> | 5.6 | 21.64 | <input type="checkbox"/> |
| 12   | 1.5×10 <sup>-3</sup>  | <a href="#">gi 21930125 gb AAM82159.1 AF523266_1</a> osteoclast stimulating factor [Rattus norvegicus]                                                                         | <a href="#">15</a> | 5.3 | 23.89 | <input type="checkbox"/> |
| 13   | 1.5×10 <sup>-3</sup>  | <a href="#">gi 38382846 gb AAH62400.1</a> Osteoclast stimulating factor 1 [Rattus norvegicus]                                                                                  | <a href="#">15</a> | 5.4 | 23.88 | <input type="checkbox"/> |
| 14   | 1.7×10 <sup>-3</sup>  | <a href="#">gi 16758744 ref NP_446330.1</a> complexin 2 [Rattus norvegicus]                                                                                                    | <a href="#">14</a> | 5.1 | 15.49 | <input type="checkbox"/> |
| 15   | 1.7×10 <sup>-3</sup>  | <a href="#">gi 1363278 pir  C57233</a> complexin II - rat                                                                                                                      | <a href="#">14</a> | 5.1 | 15.39 | <input type="checkbox"/> |
| 16   | 1.9×10 <sup>-3</sup>  | <a href="#">gi 12408324 ref NP_074055.1</a> complexin 1 [Rattus norvegicus]                                                                                                    | <a href="#">14</a> | 4.9 | 15.16 | <input type="checkbox"/> |
| 17   | 2.1×10 <sup>-3</sup>  | <a href="#">gi 13242261 ref NP_077342.1</a> neuronal calcium sensor-1 [Rattus norvegicus]                                                                                      | <a href="#">14</a> | 4.7 | 21.92 | <input type="checkbox"/> |
| 18   | 4.8×10 <sup>-3</sup>  | <a href="#">gi 20302119 ref NP_620270.1</a> dopamine receptor D1 interacting protein [Rattus norvegicus]                                                                       | <a href="#">22</a> | 5.8 | 24.99 | <input type="checkbox"/> |
| 19   | 5.5×10 <sup>-3</sup>  | <a href="#">gi 46048487 ref NP_996833.1</a> MID1 interacting G12-like protein [Rattus norvegicus]                                                                              | <a href="#">9</a>  | 5.4 | 20.51 | <input type="checkbox"/> |



|    |                      |                                                      |                                                                                                      |                    |     |       |                          |
|----|----------------------|------------------------------------------------------|------------------------------------------------------------------------------------------------------|--------------------|-----|-------|--------------------------|
| 20 | 6.5×10 <sup>-3</sup> | <a href="#">gi 204128 gb AAA41153.1</a>              | ferritin heavy chain                                                                                 | <a href="#">11</a> | 5.9 | 21.15 | <input type="checkbox"/> |
| 21 | 6.5×10 <sup>-3</sup> | <a href="#">gi 6978859 ref NP_036980.1</a>           | ferritin, heavy polypeptide 1 [Rattus norvegicus]                                                    | <a href="#">11</a> | 5.6 | 21.25 | <input type="checkbox"/> |
| 22 | 6.8×10 <sup>-3</sup> | <a href="#">gi 13492652 gb AAK28292.1 AF345445_1</a> | potassium channel beta subunit KChIP4 variant [Rattus norvegicus]                                    | <a href="#">7</a>  | 4.7 | 25.16 | <input type="checkbox"/> |
| 23 | 6.9×10 <sup>-3</sup> | <a href="#">gi 56605760 ref NP_001008342.1</a>       | prolactin-like protein-F beta [Rattus norvegicus]                                                    | <a href="#">8</a>  | 5.4 | 29.03 | <input type="checkbox"/> |
| 24 | 6.9×10 <sup>-3</sup> | <a href="#">gi 120519 sp P19132 FRIH_RAT</a>         | Ferritin heavy chain (Ferritin H subunit)                                                            | <a href="#">11</a> | 5.9 | 21.28 | <input type="checkbox"/> |
| 25 | 7.2×10 <sup>-3</sup> | <a href="#">gi 34870715 ref XP_220404.2</a>          | PREDICTED: similar to Keratinocytes-associated transmembrane protein 2 precursor [Rattus norvegicus] | <a href="#">9</a>  | 5.0 | 28.42 | <input type="checkbox"/> |
| 26 | 7.3×10 <sup>-3</sup> | <a href="#">gi 51859472 gb AAH81845.1</a>            | Fth1 protein [Rattus norvegicus]                                                                     | <a href="#">9</a>  | 6.0 | 25.22 | <input type="checkbox"/> |
| 27 | 9.0×10 <sup>-3</sup> | <a href="#">gi 56404325 sp Q6AY91 NRK1_RAT</a>       | Nicotinamide riboside kinase 1                                                                       | <a href="#">6</a>  | 4.7 | 22.47 | <input type="checkbox"/> |
| 28 | 0.011                | <a href="#">gi 34856632 ref XP_342484.1</a>          | PREDICTED: similar to zinc finger, CSL-type containing 3 [Rattus norvegicus]                         | <a href="#">7</a>  | 4.7 | 17.26 | <input type="checkbox"/> |
| 29 | 0.019                | <a href="#">gi 20151158 pdb 1L0B A</a>               | Chain A, Crystal Structure Of Rat Bracl Tandem-Brc Region                                            | <a href="#">10</a> | 5.2 | 26.51 | <input type="checkbox"/> |
| 30 | 0.051                | <a href="#">gi 27710200 ref XP_229205.1</a>          | PREDICTED: similar to dual specificity phosphatase 21 [Rattus norvegicus]                            | <a href="#">6</a>  | 5.9 | 21.66 | <input type="checkbox"/> |
| 31 | 0.057                | <a href="#">gi 7259287 dbj BAA92743.1</a>            | A-type potassium channel modulatory protein 2a [Rattus norvegicus]                                   | <a href="#">10</a> | 4.5 | 25.79 | <input type="checkbox"/> |

## NOTE:

1. To search again using [unmatched masses](#), click the symbol .
2. Highly similar protein sequences were given the same rank (click "+" to expand/contract).

## Input Summary

Search id A79F168E-12A8-57B11DF9

Sequences 20092

Date &amp; Time Thu Jan 25 16:11:53 2007 UTC (Search Time: 0.33 sec.)

Sample ID 20040825 richardson NIA set 1 spot 1111, 20070125, cleaned data #2

Database NCBIInr [..\databases\nr]

Taxonomy Rattus

Mass Range 15 - 30 kDa

pI Range 3.0 -6.0

Digestion Trypsin

Missed Cuts 0

Modifications +C2H3ON@C(Complete); +NO2-H@Y(Partial); +O@M(Partial);

Charge State MH+

Masses (avg)

**Tolerance (avg) 1.00 ppm**

**Masses (mon)** 711.378 718.316 719.506 724.420 733.368 738.365 739.462 741.474 743.398  
745.416 750.362 751.394 754.364 763.329 765.411 769.416 775.171 775.752  
778.432 780.366 786.445 792.377 798.370 801.451 814.430 820.428 824.498  
827.494 833.443 834.473 837.350 840.486 850.557 857.495 858.480 879.456  
888.494 891.464 898.506 916.479 923.108 932.471 934.527 946.946 948.479  
954.579 956.534 962.535 974.509 979.534 985.523 991.508 992.483 1002.809  
1003.448 1004.578 1013.532 1014.517 1020.547 1021.450 1024.462 1027.522  
1033.180 1041.544 1043.564 1051.555 1055.486 1060.563 1064.576 1068.530  
1082.541 1088.637 1091.525 1097.624 1107.565 1113.574 1117.687 1121.581  
1133.601 1139.725 1146.596 1151.705 1153.601 1159.596 1161.636 1172.577  
1176.590 1186.605 1187.602 1191.594 1200.669 1205.524 1207.557 1215.614  
1220.640 1227.632 1228.646 1236.016 1236.702 1237.578 1240.634 1248.586  
1251.751 1256.636 1263.659 1264.664 1271.661 1273.630 1280.796 1281.639  
1284.629 1292.672 1295.675 1301.664 1310.688 1317.591 1320.549 1323.632  
1330.791 1331.675 1336.665 1348.155 1349.588 1353.646 1360.736 1362.698  
1365.582 1372.629 1373.626 1380.469 1381.644 1390.615 1396.720 1404.654  
1407.783 1410.740 1418.105 1418.789 1421.605 1424.728 1432.716 1434.754  
1441.748 1447.632 1453.656 1461.055 1462.728 1464.711 1470.693 1482.823  
1483.627 1488.687 1493.729 1501.673 1503.735 1514.874 1518.701 1527.606  
1529.659 1532.662 1535.720 1543.855 1547.666 1554.956 1557.691 1563.728  
1570.682 1577.412 1580.702 1587.775 1589.707 1596.800 1599.761 1611.683  
1612.791 1621.724 1623.731 1631.715 1635.661 1639.774 1646.760 1651.708  
1659.816 1660.886 1665.855 1672.759 1681.691 1689.706 1698.712 1709.912  
1710.830 1718.804 1727.746 1736.179 1739.716 1748.628 1753.840 1761.828  
1764.259 1768.900 1784.934 1792.936 1796.930 1800.841 1808.879 1815.127  
1818.714 1826.820 1828.892 1835.924 1839.850 1849.537 1857.973 1860.935  
1863.578 1872.105 1874.873 1883.805 1886.845 1894.955 1898.797 1907.462  
1914.969 1923.670 1932.748 1940.867 1952.305 1955.936 1965.836 1974.174  
1982.530 1983.910 1993.940 2001.886 2009.848 2021.942 2030.277 2038.143  
2041.915 2050.902 2053.647 2057.952 2069.915 2079.331 2094.313 2103.631  
2106.473 2120.219 2123.011 2135.908 2146.940 2151.124 2161.382 2186.786  
2194.824 2201.993 2220.806 2223.092 2239.030 2258.961 2265.015 2274.706  
2278.852 2282.133 2291.087 2308.820 2311.216 2315.071 2324.024 2327.110  
2336.510 2338.399 2349.160 2352.001 2362.990 2367.249 2383.203 2394.033  
2397.957 2407.830 2416.928 2419.280 2425.082 2435.210 2439.333 2451.192  
2454.061 2463.213 2465.219 2468.230 2473.253 2478.013 2483.246 2492.150  
2496.086 2510.106 2519.599 2523.287 2527.146 2537.316 2540.031 2553.187  
2555.672 2566.548 2569.108 2579.294 2582.374 2589.191 2593.684 2597.047  
2608.905 2613.070 2620.893 2624.964 2636.228 2641.281 2652.025 2663.730  
2667.139 2677.517 2682.190 2685.331 2696.095 2706.249 2712.315 2726.333  
2736.297 2741.057 2753.274 2761.482 2772.007 2777.650 2781.415 2786.249  
2799.280 2810.448 2819.527 2832.062 2840.279 2852.608 2859.232 2873.083  
2884.542 2891.022 2894.320 2904.441 2913.235 2918.510 2929.403 2939.731  
2944.409 2955.826 2958.390 2970.899 2975.786 2978.505 2988.441 2990.283  
2994.300 3007.032 3011.467 3023.643 3034.693 3040.411 3045.279 3055.587



|          |          |          |          |          |          |          |          |
|----------|----------|----------|----------|----------|----------|----------|----------|
| 3060.989 | 3075.580 | 3087.623 | 3093.540 | 3106.594 | 3110.801 | 3122.648 | 3136.743 |
| 3153.632 | 3158.893 | 3166.128 | 3173.866 | 3177.511 | 3190.397 | 3202.737 | 3206.360 |
| 3212.581 | 3221.445 | 3232.620 | 3243.391 | 3249.532 | 3254.795 | 3265.834 | 3270.378 |
| 3282.910 | 3288.470 | 3299.682 | 3304.521 | 3315.682 | 3323.677 | 3335.299 | 3347.524 |
| 3359.109 | 3367.781 | 3379.283 | 3385.668 | 3391.745 | 3400.577 | 3409.420 | 3421.780 |
| 3435.741 | 3450.363 | 3463.312 | 3475.688 | 3479.859 | 3494.255 | 3498.875 | 3514.028 |
| 3534.577 | 3539.543 | 3551.492 | 3558.840 | 3569.614 | 3574.765 | 3582.419 | 3595.893 |
| 3599.447 | 3612.467 | 3628.510 | 3635.652 | 3640.565 | 3645.198 | 3667.385 | 3673.585 |
| 3681.792 | 3694.835 | 3698.519 |          |          |          |          |          |

**Tolerance (mon)** 10.00 ppm

**Number of Peptides** 433

# Laboratory of Mass Spectrometry and Gaseous Ion Chemistry

## PROWL

- **ProFound**
- **ProteinInfo**
- **PeptideMap**
- **PepFrag**
- **X! Tandem**
- **X! Hunter**
- **GPMDDB**
- **PROWL Home**
- **Chait Lab**

## ProFound



### Protein Candidates

| Rank | Expectation          | Protein Information and Sequence Analyse Tools (T)                                 | %  | pI  | kDa   | R |
|------|----------------------|------------------------------------------------------------------------------------|----|-----|-------|---|
| +1   | 1.2×10 <sup>-6</sup> | gi 19424194 ref NP_598220.1  RAB3C, member RAS oncogene family [Rattus norvegicus] | 63 | 5.2 | 26.11 | ● |
|      | -                    | gi 51338595 sp P62824 RAB3C_RAT Ras-related protein Rab-3C                         | 56 | 5.1 | 26.08 | ● |
| +2   | 1.5×10 <sup>-5</sup> | gi 112442 pir  A39816 tropomyosin 2, fibroblast - rat                              | 38 | 4.7 | 32.75 | ● |
|      | -                    | gi 207502 gb AAA18097.1  alpha-tropomyosin 3                                       | 37 | 4.7 | 32.83 | ● |
|      | -                    | gi 14134107 gb AAK54243.1 AF372217_1 tropomyosin alpha isoform [Rattus norvegicus] | 36 | 4.8 | 33.07 | ● |
|      | -                    | gi 207351 gb AAA21805.1  non-muscle alpha tropomyosin                              | 36 | 4.8 | 32.77 | ● |
|      | -                    | gi 207353 gb AAA21802.1  hepatoma alpha tropomyosin                                | 36 | 4.8 | 32.85 | ● |
|      | -                    | gi 207349 gb AAA21801.1  striated-muscle alpha tropomyosin                         | 32 | 4.7 | 32.73 | ● |
|      | -                    | gi 207352 gb AAA21803.1  minor striated-muscle alpha tropomyosin                   | 26 | 4.8 | 33.93 | ● |
|      | -                    | gi 207355 gb AAA42252.1  brain alpha-tropomyosin (TMBr-1)                          | 31 | 4.7 | 32.55 | ● |
|      | -                    | gi 112446 pir  C39816 tropomyosin 5a, fibroblast - rat                             | 35 | 4.7 | 28.60 | ● |
|      | -                    | gi 112447 pir  D39816 tropomyosin 5b, fibroblast - rat                             | 34 | 4.7 | 28.68 | ● |
|      | -                    | gi 112448 pir  A22165 tropomyosin alpha chain, smooth muscle - rat                 | 29 | 4.9 | 32.24 | ● |
|      | -                    | gi 207350 gb AAA21804.1  smooth-muscle alpha tropomyosin                           | 29 | 4.7 | 32.71 | ● |
|      | -                    | gi 50926969 gb AAH79119.1  Similar to RIKEN cDNA 5830446M03 [Rattus norvegicus]    | 49 | 5.2 | 32.90 | ● |
|      | -                    | gi 1098969 gb AAC53100.1  inositol 1,4,5-trisphosphate receptor                    | 45 | 5.2 | 22.58 | ● |
|      | -                    | gi 38051907 gb AAH60562.1  Rab3b protein [Rattus norvegicus]                       | 64 | 5.0 | 26.12 | ● |

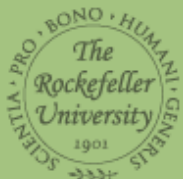

The Rockefeller University  
1230 York Avenue,  
New York, NY 10021  
(212) 327-8000



**National Center for  
Research Resources**

National Resource  
for the Mass Spectrometric  
Analysis of Biological  
Macromolecules

|   |                                                                                                    |    |     |       |  |
|---|----------------------------------------------------------------------------------------------------|----|-----|-------|--|
| - | <a href="#">gi 13592037 ref NP_112353.1 </a> RAB3B, member RAS oncogene family [Rattus norvegicus] | 55 | 4.9 | 25.00 |  |
| - | <a href="#">gi 2981437 gb AAC06290.1 </a> lipocortin V [Rattus norvegicus]                         | 38 | 5.0 | 33.95 |  |
| - | <a href="#">gi 56649 emb CAA34347.1 </a> myosin heavy chain (AA 279) [Rattus norvegicus]           | 40 | 5.2 | 31.98 |  |
| - | <a href="#">gi 9653293 gb AAB37701.2 </a> tropomyosin 5; TM-5 [Rattus sp.]                         | 31 | 4.7 | 29.16 |  |
| - | <a href="#">gi 56971497 gb AAH88253.1 </a> Similar to RIKEN cDNA 4933417L10 [Rattus norvegicus]    | 27 | 5.2 | 33.52 |  |
| - | <a href="#">gi 56388776 gb AAH87696.1 </a> Fgfr1op2 protein [Rattus norvegicus]                    | 44 | 5.4 | 25.05 |  |

## NOTE:

1. To search again using **unmatched masses**, click the symbol .
2. Highly similar protein sequences were given the same rank (click "+" to expand/contract).

**Input Summary****Search id** ACD81015-OD60-ADA43B0E**Sequences** 20076**Date & Time** Tue Feb 06 02:06:02 2007 UTC (Search Time: 0.53 sec.)**Sample ID****Database** NCBI\nr [..\databases\nr]**Taxonomy** Rattus**Mass Range** 19 - 34 kDa**pI Range** 4.7 -5.8**Digestion** Trypsin**Missed Cuts** 1**Modifications** +C2H3ON@C(Complete); +O@M(Partial); +HPO3@SY(Partial);**Charge State** MH+**Masses (avg)****Tolerance (avg)** 1.00 ppm

**Masses (mon)** 710.379 718.663 719.420 722.362 726.397 728.410 733.408  
740.416 743.438 745.419 751.488 754.385 761.455 766.380  
768.447 774.460 776.407 779.464 781.437 787.406 793.399  
794.422 797.362 803.449 805.395 813.448 817.404 820.367  
824.513 827.470 831.499 837.384 838.416 840.481 848.670  
850.532 859.499 889.488 903.503 916.487 918.463 932.479  
934.493 941.476 942.529 948.444 959.537 960.496 964.503  
979.560 988.527 990.537 1003.558 1015.505 1018.508  
1024.550 1027.545 1033.548 1040.589 1051.686 1057.540  
1060.562 1063.455 1069.519 1085.618 1088.679 1094.614  
1100.342 1103.558 1106.554 1113.503 1115.592 1118.515  
1124.598 1132.917 1133.573 1134.548 1147.593 1149.600  
1155.607 1157.598 1162.593 1172.548 1177.599 1186.598  
1200.662 1207.573 1214.645 1218.588 1221.596 1228.661  
1229.605 1232.603 1240.625 1243.637 1251.765 1258.583  
1263.673 1271.028 1272.636 1286.645 1288.673 1304.618  
1307.682 1314.627 1316.702 1320.685 1324.674 1332.720  
1336.776 1344.711 1349.700 1356.780 1357.673 1365.645  
1372.742 1373.639 1382.683 1391.657 1394.671 1402.221  
1402.751 1407.695 1414.901 1416.699 1423.598 1428.757  
1433.748 1440.764 1447.772 1449.719 1456.749 1458.805  
1461.712 1468.796 1469.725 1477.062 1477.760 1484.755  
1488.725 1491.739 1498.740 1505.732 1514.913 1517.639  
1525.778 1532.911 1535.706 1542.730 1544.740 1547.758  
1555.739 1558.740 1563.767 1570.908 1571.842 1579.752  
1585.830 1589.827 1596.840 1597.754 1605.782 1608.994  
1612.857 1620.788 1621.872 1624.882 1633.985 1635.754  
1638.832 1646.799 1654.758 1656.812 1660.760 1664.741  
1670.816 1680.764 1681.786 1690.798 1707.725 1708.727  
1724.905 1727.730 1735.995 1736.836 1739.867 1747.654  
1749.794 1752.921 1756.870 1764.836 1765.685 1773.388  
1783.694 1787.990 1790.809 1797.910 1805.941 1806.857  
1810.808 1818.953 1820.820 1828.815 1832.935 1841.795  
1846.912 1855.168 1856.821 1860.943 1868.823 1870.773  
1873.861 1882.031 1884.836 1889.984 1899.978 1908.146  
1919.132 1930.002 1940.991 1950.912 1956.864 1960.947  
1974.956 1979.896 1988.084 1993.913 2002.943 2011.088  
2020.066 2021.882 2034.831 2037.900 2047.914 2050.992  
2059.968 2068.013 2070.004 2079.052 2088.950 2093.046

|          |          |          |          |          |          |
|----------|----------|----------|----------|----------|----------|
| 2107.025 | 2122.105 | 2136.865 | 2146.994 | 2150.053 | 2159.055 |
| 2162.154 | 2171.213 | 2174.070 | 2184.160 | 2193.991 | 2196.073 |
| 2205.424 | 2208.019 | 2219.933 | 2221.139 | 2230.066 | 2238.151 |
| 2248.262 | 2250.977 | 2260.093 | 2265.058 | 2275.133 | 2279.215 |
| 2282.077 | 2290.933 | 2295.157 | 2308.179 | 2310.638 | 2315.140 |
| 2324.125 | 2327.113 | 2336.251 | 2337.945 | 2342.114 | 2351.086 |
| 2353.078 | 2364.134 | 2367.180 | 2376.397 | 2378.137 | 2382.047 |
| 2391.293 | 2394.258 | 2397.950 | 2407.921 | 2411.921 | 2422.219 |
| 2424.010 | 2433.403 | 2436.028 | 2440.185 | 2451.043 | 2454.045 |
| 2463.329 | 2470.086 | 2481.111 | 2493.910 | 2502.090 | 2509.069 |
| 2518.592 | 2522.278 | 2527.219 | 2537.047 | 2551.146 | 2555.094 |
| 2568.184 | 2583.020 | 2596.078 | 2617.124 | 2626.229 | 2645.871 |
| 2651.521 | 2656.275 | 2667.152 | 2670.109 | 2678.365 | 2682.200 |
| 2688.308 | 2695.053 | 2705.658 | 2707.305 | 2717.513 | 2723.135 |
| 2735.063 | 2746.383 | 2756.169 | 2767.249 | 2775.298 | 2779.380 |
| 2793.211 | 2797.377 | 2807.326 | 2811.289 | 2824.446 | 2836.452 |
| 2839.322 | 2853.517 | 2858.269 | 2868.217 | 2883.207 | 2893.234 |
| 2896.351 | 2903.242 | 2914.359 | 2925.460 | 2931.255 | 2942.974 |
| 2958.414 | 2965.269 | 2981.099 | 2985.403 | 3002.024 | 3013.217 |
| 3023.430 | 3033.179 | 3039.266 | 3041.940 | 3046.771 | 3050.379 |
| 3061.624 | 3066.247 | 3069.679 | 3080.511 | 3085.523 | 3093.573 |
| 3104.747 | 3110.604 | 3121.507 | 3126.326 | 3138.238 | 3144.467 |
| 3155.354 | 3166.715 | 3169.406 | 3177.299 | 3188.660 | 3199.776 |
| 3205.684 | 3216.944 | 3228.185 | 3230.749 | 3243.203 | 3247.270 |
| 3256.449 | 3265.527 | 3278.086 | 3282.637 | 3288.544 | 3292.330 |
| 3304.475 | 3316.333 | 3321.377 | 3329.572 | 3336.338 | 3346.499 |
| 3357.768 | 3369.329 | 3381.498 | 3394.512 | 3408.495 | 3423.885 |
| 3439.587 | 3446.938 | 3466.140 | 3487.145 | 3525.024 | 3538.110 |
| 3549.174 | 3554.752 | 3558.165 | 3570.024 | 3584.563 | 3628.356 |
| 3652.569 | 3659.896 | 3672.780 | 3700.659 |          |          |

**Tolerance** 27.00 ppm  
**(mon)**

**Number of** 419  
**Peptides**

PROWL

## ProFound

- [ProFound](#)
- [ProteinInfo](#)
- [PeptideMap](#)
- [PepFrag](#)
- [X! Tandem](#)
- [X! Hunter](#)
- [GPMDB](#)
- [PROWL Home](#)
- [Chait Lab](#)

The Rockefeller  
University

The Rockefeller University  
1230 York Avenue,  
New York, NY 10021  
(212) 327-8000

National Center of  
Research Resources

National Resource  
for the Mass Spectrometric  
Analysis of Biological  
Macromolecules

## Protein Candidates

| Rank | Expectation           | Protein Information and Sequence Analyse Tools (T)                                                                                                                     | %                  | pI  | kDa   | R                        |
|------|-----------------------|------------------------------------------------------------------------------------------------------------------------------------------------------------------------|--------------------|-----|-------|--------------------------|
| +1   | 8.5×10 <sup>-20</sup> | <a href="#">gi 2914269 pdb 1TIP A</a> Chain A, The Bisphosphatase Domain Of The Bifunctional Rat Liver 6-Phosphofructo-2-KinaseFRUCTOSE-2,6-Bisphosphatase             | <a href="#">28</a> | 5.7 | 22.34 | <input type="checkbox"/> |
|      | -                     | <a href="#">gi 33356831 pdb 1C7Z A</a> Chain A, Regulatory Complex Of Fructose-2,6-Bisphosphatase                                                                      | <a href="#">28</a> | 5.8 | 22.48 | <input type="checkbox"/> |
| 2    | 2.7×10 <sup>-9</sup>  | <a href="#">gi 3176876 gb AAC18852.1</a> ankyrinG [Rattus norvegicus]                                                                                                  | <a href="#">34</a> | 5.0 | 15.94 | <input type="checkbox"/> |
| 3    | 3.7×10 <sup>-8</sup>  | <a href="#">gi 34881545 ref XP_346352.1</a> PREDICTED: similar to RAB9B, member RAS oncogene family [Rattus norvegicus]                                                | <a href="#">19</a> | 4.8 | 23.04 | <input type="checkbox"/> |
| 4    | 4.1×10 <sup>-8</sup>  | <a href="#">gi 203278 gb AAA40870.1</a> clathryn light chain (LCA3)                                                                                                    | <a href="#">6</a>  | 4.4 | 23.60 | <input type="checkbox"/> |
| 5    | 6.2×10 <sup>-8</sup>  | <a href="#">gi 39654405 pdb 1PID A</a> Chain A, Structural Insights Into The Inter-Domain Chaperoning Of Tandem Pdz Domains In Glutamate Receptor Interacting Proteins | <a href="#">15</a> | 4.7 | 21.32 | <input type="checkbox"/> |
| 6    | 7.2×10 <sup>-8</sup>  | <a href="#">gi 56090373 ref NP_001007648.1</a> hypothetical protein LOC297337 [Rattus norvegicus]                                                                      | <a href="#">9</a>  | 5.7 | 19.67 | <input type="checkbox"/> |
| 7    | 7.3×10 <sup>-8</sup>  | <a href="#">gi 57863782 ref NP_001009264.1</a> T-cell activation protein [Rattus norvegicus]                                                                           | <a href="#">14</a> | 4.7 | 14.20 | <input type="checkbox"/> |
| 8    | 1.9×10 <sup>-7</sup>  | <a href="#">gi 27708842 ref XP_216097.1</a> PREDICTED: similar to replication protein A3 [Rattus norvegicus]                                                           | <a href="#">18</a> | 4.8 | 13.79 | <input type="checkbox"/> |
| 9    | 5.8×10 <sup>-7</sup>  | <a href="#">gi 1929922 gb AAB51478.1</a> anti-idiotype immunoglobulin M heavy chain [Rattus norvegicus]                                                                | <a href="#">28</a> | 4.7 | 19.33 | <input type="checkbox"/> |
| 10   | 2.1×10 <sup>-6</sup>  | <a href="#">gi 207359 gb AAA42254.1</a> brain alpha-tropomyosin (TMBr-3)                                                                                               | <a href="#">8</a>  | 4.6 | 23.33 | <input type="checkbox"/> |
| 11   | 3.3×10 <sup>-6</sup>  | <a href="#">gi 55831 emb CAA35499.1</a> unnamed protein product [Rattus norvegicus]                                                                                    | <a href="#">18</a> | 4.6 | 19.73 | <input type="checkbox"/> |
| 12   | 4.5×10 <sup>-6</sup>  | <a href="#">gi 554472 gb AAA41539.1</a> lactase phlorizin hydrolase [Rattus norvegicus]                                                                                | <a href="#">7</a>  | 5.4 | 24.41 | <input type="checkbox"/> |
| 13   | 4.5×10 <sup>-6</sup>  | <a href="#">gi 2392330 pdb 1FBT A</a> Chain A, The Bisphosphatase Domain Of The Bifunctional Rat Liver 6-Phosphofructo-2-KinaseFRUCTOSE-2,6-Bisphosphatase             | <a href="#">9</a>  | 5.8 | 21.82 | <input type="checkbox"/> |
| 14   | 7.4×10 <sup>-6</sup>  | <a href="#">gi 134717 sp P01244 SOMA_RAT</a> Somatotropin precursor (Growth hormone)                                                                                   | <a href="#">14</a> | 5.7 | 24.92 | <input type="checkbox"/> |
| 15   | 7.4×10 <sup>-6</sup>  | <a href="#">gi 56318 emb CAA24547.1</a> unnamed protein product [Rattus norvegicus]                                                                                    | <a href="#">14</a> | 5.7 | 24.89 | <input type="checkbox"/> |
| 16   | 9.7×10 <sup>-6</sup>  | <a href="#">gi 14994701 gb AAK76996.1</a> epidermal growth factor receptor [Rattus norvegicus]                                                                         | <a href="#">3</a>  | 5.4 | 20.67 | <input type="checkbox"/> |
| 17   | 2.4×10 <sup>-5</sup>  | <a href="#">gi 6981520 ref NP_037214.1</a> syndecan 2 [Rattus norvegicus]                                                                                              | <a href="#">18</a> | 4.6 | 23.26 | <input type="checkbox"/> |



|    |                      |                                                                                                                                                                                                        |                    |     |       |                          |
|----|----------------------|--------------------------------------------------------------------------------------------------------------------------------------------------------------------------------------------------------|--------------------|-----|-------|--------------------------|
| 18 | 2.4×10 <sup>-5</sup> | <a href="#">gi 3171996 emb CAA06509.1 </a> collagen alpha 1 (V) [Rattus norvegicus]                                                                                                                    | <a href="#">14</a> | 4.8 | 22.73 | <input type="checkbox"/> |
| 19 | 2.2×10 <sup>-4</sup> | <a href="#">gi 2842665 sp Q64119 MYL6_RAT</a> Myosin light polypeptide 6 (Smooth muscle and nonmuscle myosin light chain alkali 6) (Myosin light chain alkali 3) (Myosin light chain 3) (MLC-3) (LC17) | <a href="#">13</a> | 4.5 | 17.13 | <input type="checkbox"/> |
| 20 | 9.4×10 <sup>-4</sup> | <a href="#">gi 18266698 ref NP_543171.1 </a> Fas apoptotic inhibitory molecule [Rattus norvegicus]                                                                                                     | <a href="#">17</a> | 5.3 | 20.43 | <input type="checkbox"/> |
| 21 | 1.3×10 <sup>-3</sup> | <a href="#">gi 38502804 sp Q8R5H8 FAIM1_RAT</a> Fas apoptotic inhibitory molecule 1 (rFAIM)                                                                                                            | <a href="#">15</a> | 4.8 | 22.86 | <input type="checkbox"/> |
| 22 | 0.64                 | <a href="#">gi 34873950 ref XP_213490.2 </a> PREDICTED: similar to Protein C21orf58 [Rattus norvegicus]                                                                                                | <a href="#">16</a> | 4.6 | 20.59 | <input type="checkbox"/> |

## NOTE:

1. To search again using [unmatched masses](#), click the symbol .
2. Highly similar protein sequences were given the same rank (click "+" to expand/contract).

## Input Summary

Search id AA91FA68-0F90-5AC92111

Sequences 20076

Date &amp; Time Thu Feb 22 19:59:04 2007 UTC (Search Time: 0.28 sec.)

Sample ID 20040825 richardson NIA set 1 spot 2112 CONSENSUS search

Database NCBIInr [..\databases\nr]

Taxonomy Rattus

Mass Range 12 - 25 kDa

pI Range 3.0 -6.0

Digestion Trypsin

Missed Cuts 0

Modifications +C2H3ON@C(Complete); +O@M(Partial); +HPO3@Y(Partial);

Charge State MH+

Masses (avg)

Tolerance (avg) 1.00 ppm

**Masses (mon)** 710.273 711.295 718.449 719.260 721.353 726.309 731.318 733.374 738.390  
740.346 745.422 750.294 755.423 757.402 762.462 766.328 772.371 773.287  
778.456 784.471 786.318 789.394 795.414 796.457 802.446 803.456 812.401  
818.393 820.317 824.406 827.479 838.542 840.471 850.503 862.272 864.485  
876.330 879.479 888.437 889.520 893.416 898.489 904.467 916.380 920.415  
932.474 933.481 939.553 941.451 945.459 950.533 954.581 960.451 961.451  
965.502 974.490 977.495 988.461 994.541 1002.427 1012.847 1013.490 1016.469  
1022.655 1023.537 1025.497 1031.516 1040.741 1041.500 1051.511 1056.513  
1062.557 1068.530 1079.488 1085.531 1086.373 1090.546 1096.531 1097.132  
1098.559 1107.564 1111.531 1117.505 1119.508 1125.617 1132.535 1133.576  
1138.474 1141.473 1147.619 1148.531 1154.513 1157.578 1164.226 1169.558  
1176.656 1187.877 1189.617 1196.799 1197.521 1204.609 1205.637 1208.513  
1215.564 1221.648 1228.642 1229.728 1233.553 1240.606 1243.404 1247.536  
1254.581 1256.441 1261.598 1264.587 1271.584 1272.160 1274.730 1277.566  
1281.610 1288.993 1289.669 1297.656 1304.428 1306.689 1313.631 1320.616  
1326.615 1332.651 1339.735 1347.382 1350.521 1357.628 1362.642 1369.606  
1373.669 1381.587 1385.642 1391.536 1396.712 1403.738 1405.605 1408.584  
1411.718 1418.832 1424.745 1431.917 1433.701 1438.649 1447.597 1448.494  
1451.697 1458.758 1460.275 1463.646 1470.684 1477.764 1479.731 1486.470  
1487.223 1488.755 1492.522 1499.786 1501.663 1509.681 1516.672 1518.638  
1524.808 1529.701 1536.685 1537.345 1541.649 1548.634 1550.939 1553.618  
1557.680 1565.739 1569.764 1574.728 1581.921 1588.702 1593.239 1597.810  
1604.948 1608.834 1616.727 1619.651 1622.796 1630.777 1638.725 1641.724  
1650.026 1651.940 1660.350 1662.518 1666.775 1674.837 1678.751 1687.147  
1689.774 1697.726 1702.861 1710.954 1711.484 1713.935 1716.639 1724.290  
1725.968 1733.864 1735.883 1739.671 1744.814 1753.006 1755.601 1761.727  
1770.809 1782.898 1791.009 1792.805 1796.940 1804.940 1811.926 1819.873  
1821.798 1830.170 1831.812 1843.645 1853.777 1856.909 1862.019 1871.036  
1874.941 1882.996 1886.270 1889.839 1895.698 1904.238 1907.795 1916.038  
1918.043 1922.852 1932.046 1940.697 1950.141 1954.962 1963.695 1971.012  
1976.666 1984.967 1986.407 1991.783 1996.865 2004.756 2009.342 2013.268  
2018.528 2028.979 2032.924 2043.930 2052.708 2058.967 2066.980 2070.349  
2093.702 2096.137 2105.181 2108.581 2111.488 2120.782 2126.803 2137.999  
2147.787 2150.909 2160.102 2163.891 2177.980 2185.971 2194.923 2200.069  
2209.081 2220.238 2222.078 2239.064 2248.092 2257.203 2258.963 2263.927  
2273.166 2276.314 2281.974 2290.669 2295.023 2310.084 2319.060 2338.041  
2348.475 2352.851 2356.119 2365.512 2367.150 2380.046 2390.014 2393.308  
2400.959 2413.021 2415.073 2425.943 2436.206 2437.237 2443.293 2453.759  
2464.147 2466.990 2481.129 2494.098 2499.484 2512.298 2521.354 2531.309  
2535.242 2544.477 2546.108 2557.133 2568.114 2572.109 2584.184 2588.295  
2598.244 2602.916 2613.891 2617.509 2628.964 2633.179 2636.015 2646.090  
2650.216 2661.290 2672.179 2680.962 2691.367 2695.178 2705.295 2712.308  
2722.563 2728.401 2738.898 2743.342 2749.202 2760.093 2766.113 2770.012  
2779.026 2789.156 2798.522 2808.153 2819.732 2826.534 2833.128 2843.393  
2846.771 2851.842 2859.294 2867.225 2872.205 2882.396 2892.823 2897.753  
2908.643 2914.241 2917.552 2928.406 2938.586 2941.143 2951.199 2960.320  
2972.171 2978.897 2991.043 3003.990 3010.640 3016.224 3027.631 3031.265



|          |          |          |          |          |          |          |          |
|----------|----------|----------|----------|----------|----------|----------|----------|
| 3041.437 | 3044.187 | 3054.230 | 3055.199 | 3065.448 | 3067.649 | 3071.755 | 3076.087 |
| 3087.157 | 3093.074 | 3104.475 | 3108.755 | 3112.513 | 3125.418 | 3136.462 | 3149.341 |
| 3157.550 | 3169.106 | 3174.569 | 3181.405 | 3187.373 | 3198.336 | 3202.604 | 3215.732 |
| 3229.805 | 3234.860 | 3245.674 | 3258.658 | 3262.581 | 3271.514 | 3284.897 | 3288.643 |
| 3298.385 | 3313.450 | 3318.764 | 3330.104 | 3333.137 | 3347.229 | 3358.852 | 3363.148 |
| 3371.903 | 3385.606 | 3397.608 | 3408.570 | 3421.756 | 3426.485 | 3429.561 | 3440.297 |
| 3451.684 | 3463.327 | 3469.591 | 3481.105 | 3490.409 | 3501.558 | 3507.299 | 3521.311 |
| 3526.348 | 3544.365 | 3549.379 | 3563.594 | 3570.190 | 3591.303 | 3595.340 | 3610.536 |
| 3625.804 | 3629.981 | 3634.770 | 3637.855 | 3650.862 | 3670.088 | 3686.583 | 3699.879 |

**Tolerance (mon)** 9.00 ppm

**Number of Peptides** 455

# Laboratory of Mass Spectrometry and Gaseous Ion Chemistry

## PROWL

- **ProFound**
- **ProteinInfo**
- **PeptideMap**
- **PepFrag**
- **X! Tandem**
- **X! Hunter**
- **GPMDDB**
- **PROWL Home**
- **Chait Lab**

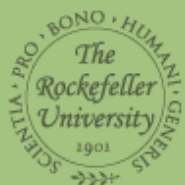

The Rockefeller University  
1230 York Avenue,  
New York, NY 10021  
(212) 327-8000



**National Center for  
Research Resources**

National Resource  
for the Mass Spectrometric  
Analysis of Biological  
Macromolecules

## ProFound



### Protein Candidates

| Rank | Expectation          | Protein Information and Sequence Analyse Tools (T)                                                                                                                  | %  | pI  | kDa   | R |
|------|----------------------|---------------------------------------------------------------------------------------------------------------------------------------------------------------------|----|-----|-------|---|
| 1    | 1.3×10 <sup>-5</sup> | gi 52000743 sp  Q63862_2 [Segment 2 of 2] Myosin-11 (Myosin heavy chain, smooth muscle isoform) (SMMHC)                                                             | 56 | 5.1 | 71.76 | ⊙ |
| +2   | 2.1×10 <sup>-3</sup> | gi 48734834 gb AAH72523.1  Anxa6 protein [Rattus norvegicus]                                                                                                        | 53 | 5.4 | 76.14 | ⊙ |
| -    | -                    | gi 13994159 ref NP_077070.1  annexin A6 [Rattus norvegicus]                                                                                                         | 53 | 5.4 | 76.14 | ⊙ |
| -    | -                    | gi 20302073 ref NP_620244.1  cadherin 13 [Rattus norvegicus]                                                                                                        | 37 | 5.0 | 78.47 | ⊙ |
| -    | -                    | gi 127572 sp P18589 MX2_RAT Interferon-induced GTP-binding protein Mx2                                                                                              | 45 | 5.5 | 75.63 | ⊙ |
| -    | -                    | gi 127573 sp P18590 MX3_RAT Interferon-induced GTP-binding protein Mx3                                                                                              | 44 | 5.3 | 75.56 | ⊙ |
| -    | -                    | gi 6978647 ref NP_036658.1  chromogranin B [Rattus norvegicus]                                                                                                      | 51 | 5.0 | 77.49 | ⊙ |
| -    | -                    | gi 53734296 gb AAH83905.1  Lrrc43 protein [Rattus norvegicus]                                                                                                       | 35 | 5.2 | 76.55 | ⊙ |
| -    | -                    | gi 34859658 ref XP_235782.2  PREDICTED: similar to Kelch repeat and BTB domain-containing protein 3 (BTB and kelch domain-containing protein 3) [Rattus norvegicus] | 52 | 5.6 | 70.74 | ⊙ |
| -    | -                    | gi 13928780 ref NP_113764.1  cytochrome P450 reductase [Rattus norvegicus]                                                                                          | 38 | 5.3 | 77.34 | ⊙ |
| -    | -                    | gi 205660 gb AAA41683.1  NADPH-cytochrome P-450 oxidoreductase                                                                                                      | 36 | 5.3 | 77.32 | ⊙ |

### NOTE:

1. To search again using **unmatched masses**, click the symbol ⊙.
2. Highly similar protein sequences were given the same rank (click "+" to expand/contract).

**Input Summary****Search id** AE3D8DDE-0BFC-BODDC982**Sequences** 20076**Date & Time** Sun Feb 04 23:03:01 2007 UTC (Search Time: 0.55 sec.)**Sample ID****Database** NCBI nr [..\databases\nr]**Taxonomy** Rattus**Mass Range** 69 - 80 kDa**pI Range** 4.8 -5.6**Digestion** Trypsin**Missed Cuts** 1**Modifications** +C2H3ON@C(Complete); +O@M(Partial); +HPO3@STY(Partial);**Charge State** MH+**Masses (avg)****Tolerance (avg)** 1.00 ppm

| <b>Masses (mon)</b> | 710.379  | 712.244  | 717.458  | 720.469  | 724.499  | 740.240  | 745.426 |
|---------------------|----------|----------|----------|----------|----------|----------|---------|
|                     | 750.410  | 751.460  | 754.431  | 763.435  | 767.416  | 769.429  | 773.445 |
|                     | 780.418  | 786.498  | 791.448  | 797.399  | 798.482  | 804.461  | 813.451 |
|                     | 814.430  | 820.448  | 824.499  | 830.477  | 837.975  | 839.514  | 841.484 |
|                     | 854.528  | 862.470  | 880.480  | 886.518  | 888.481  | 891.491  | 902.733 |
|                     | 903.522  | 905.464  | 908.543  | 916.529  | 918.505  | 932.544  | 938.593 |
|                     | 941.522  | 944.559  | 950.606  | 958.712  | 959.524  | 966.581  | 970.580 |
|                     | 979.508  | 988.519  | 993.538  | 1003.594 | 1013.593 | 1016.551 |         |
|                     | 1022.523 | 1023.578 | 1029.570 | 1033.547 | 1037.552 | 1044.564 |         |
|                     | 1051.686 | 1057.892 | 1058.636 | 1060.564 | 1066.598 | 1067.675 |         |
|                     | 1085.690 | 1088.685 | 1092.552 | 1098.587 | 1106.519 | 1112.548 |         |
|                     | 1113.625 | 1117.626 | 1123.956 | 1124.701 | 1132.907 | 1133.564 |         |
|                     | 1138.599 | 1146.605 | 1148.543 | 1151.669 | 1158.645 | 1164.608 |         |
|                     | 1173.627 | 1175.634 | 1187.686 | 1188.660 | 1200.639 | 1208.790 |         |
|                     | 1209.633 | 1211.717 | 1218.661 | 1220.611 | 1225.672 | 1228.689 |         |
|                     | 1236.770 | 1238.664 | 1244.616 | 1249.583 | 1254.727 | 1261.650 |         |
|                     | 1263.707 | 1270.990 | 1271.710 | 1273.679 | 1284.631 | 1288.807 |         |
|                     | 1291.515 | 1303.880 | 1305.533 | 1312.839 | 1314.693 | 1319.529 |         |
|                     | 1327.707 | 1329.670 | 1337.486 | 1338.791 | 1347.795 | 1351.751 |         |
|                     | 1354.747 | 1357.722 | 1364.824 | 1365.794 | 1373.666 | 1380.710 |         |

|          |          |          |          |          |          |
|----------|----------|----------|----------|----------|----------|
| 1381.860 | 1389.628 | 1396.612 | 1399.657 | 1403.639 | 1412.732 |
| 1417.416 | 1424.648 | 1426.732 | 1428.792 | 1435.798 | 1442.821 |
| 1445.430 | 1453.682 | 1454.786 | 1460.774 | 1467.832 | 1470.903 |
| 1483.191 | 1483.814 | 1485.733 | 1490.719 | 1497.797 | 1504.761 |
| 1515.697 | 1519.788 | 1523.753 | 1529.540 | 1537.791 | 1544.822 |
| 1547.760 | 1555.769 | 1561.856 | 1569.021 | 1570.808 | 1577.860 |
| 1579.679 | 1584.847 | 1590.856 | 1596.984 | 1604.823 | 1609.735 |
| 1613.925 | 1617.470 | 1626.879 | 1635.172 | 1637.896 | 1645.889 |
| 1647.993 | 1656.230 | 1664.021 | 1666.631 | 1674.832 | 1676.927 |
| 1681.782 | 1686.756 | 1689.771 | 1697.835 | 1707.810 | 1715.749 |
| 1716.920 | 1725.803 | 1731.570 | 1734.794 | 1743.864 | 1745.580 |
| 1757.613 | 1765.780 | 1785.898 | 1788.944 | 1797.041 | 1804.928 |
| 1806.960 | 1815.041 | 1820.007 | 1828.866 | 1837.891 | 1847.950 |
| 1854.817 | 1857.950 | 1866.959 | 1873.978 | 1881.828 | 1890.982 |
| 1899.161 | 1907.975 | 1913.952 | 1922.948 | 1924.897 | 1928.740 |
| 1937.890 | 1944.031 | 1954.318 | 1964.871 | 1976.860 | 1985.103 |
| 1994.024 | 2002.032 | 2011.082 | 2020.032 | 2029.699 | 2033.068 |
| 2037.109 | 2046.299 | 2053.160 | 2066.947 | 2078.199 | 2101.228 |
| 2106.233 | 2111.026 | 2120.134 | 2133.272 | 2136.789 | 2140.091 |
| 2152.041 | 2161.237 | 2163.241 | 2183.431 | 2186.044 | 2191.117 |
| 2195.092 | 2204.063 | 2208.081 | 2220.410 | 2222.060 | 2231.246 |
| 2238.251 | 2247.087 | 2258.180 | 2260.325 | 2270.616 | 2276.365 |
| 2283.184 | 2292.366 | 2296.173 | 2310.300 | 2315.256 | 2337.413 |
| 2343.083 | 2353.235 | 2363.114 | 2367.307 | 2376.296 | 2384.249 |
| 2388.132 | 2394.391 | 2399.106 | 2408.652 | 2420.236 | 2425.177 |
| 2434.474 | 2436.336 | 2440.328 | 2450.955 | 2455.459 | 2465.417 |
| 2470.169 | 2480.357 | 2492.955 | 2500.326 | 2509.463 | 2522.472 |
| 2535.448 | 2545.770 | 2548.286 | 2561.123 | 2571.532 | 2575.599 |
| 2585.181 | 2596.256 | 2608.250 | 2611.451 | 2617.617 | 2631.421 |
| 2645.471 | 2657.509 | 2666.233 | 2675.982 | 2679.294 | 2690.500 |
| 2695.499 | 2706.387 | 2710.209 | 2720.741 | 2723.483 | 2734.322 |
| 2746.454 | 2762.365 | 2773.495 | 2779.494 | 2782.976 | 2795.501 |
| 2806.447 | 2810.446 | 2815.162 | 2826.183 | 2831.307 | 2842.467 |
| 2854.764 | 2857.357 | 2866.728 | 2877.559 | 2888.882 | 2900.046 |
| 2903.421 | 2915.595 | 2926.519 | 2936.551 | 2950.184 | 2953.808 |
| 2967.078 | 2979.200 | 2987.186 | 2991.495 | 2997.689 | 3001.305 |
| 3013.571 | 3021.973 | 3032.092 | 3035.729 | 3047.768 | 3051.786 |
| 3062.216 | 3075.540 | 3086.759 | 3094.699 | 3105.878 | 3108.507 |
| 3111.851 | 3123.662 | 3134.667 | 3144.822 | 3149.773 | 3155.447 |



|          |          |          |          |          |          |
|----------|----------|----------|----------|----------|----------|
| 3164.612 | 3174.625 | 3187.658 | 3199.080 | 3202.548 | 3215.066 |
| 3219.804 | 3225.349 | 3237.182 | 3245.467 | 3252.226 | 3259.606 |
| 3264.839 | 3276.320 | 3289.367 | 3292.729 | 3305.615 | 3318.486 |
| 3326.719 | 3330.955 | 3341.850 | 3345.551 | 3353.817 | 3364.827 |
| 3376.795 | 3382.630 | 3397.613 | 3407.594 | 3420.426 | 3424.958 |
| 3432.097 | 3444.184 | 3459.222 | 3478.067 | 3492.423 | 3502.980 |
| 3506.250 | 3518.146 | 3526.741 | 3537.751 | 3549.138 | 3565.287 |
| 3579.579 | 3589.540 | 3593.698 | 3617.317 | 3620.518 | 3625.991 |
| 3639.834 | 3667.151 | 3677.640 | 3691.908 | 3694.610 |          |

**Tolerance** 77.00 ppm  
**(mon)**

**Number of** 414  
**Peptides**

# Laboratory of Mass Spectrometry and Gaseous Ion Chemistry

## PROWL

- ▶ **ProFound**
- ▶ **ProteinInfo**
- ▶ **PeptideMap**
- ▶ **PepFrag**
- ▶ **X! Tandem**
- ▶ **X! Hunter**
- ▶ **GPMDDB**
- ▶ **PROWL Home**
- ▶ **Chait Lab**

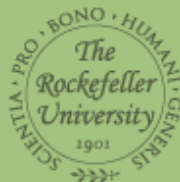

The Rockefeller University  
1230 York Avenue,  
New York, NY 10021  
(212) 327-8000



**National Center for  
Research Resources**

National Resource  
for the Mass Spectrometric  
Analysis of Biological  
Macromolecules

## ProFound



### Protein Candidates

| Rank | Expectation          | Protein Information and Sequence Analyse Tools (T)                                                                   | %  | pI  | kDa   | R |
|------|----------------------|----------------------------------------------------------------------------------------------------------------------|----|-----|-------|---|
| 1    | 1.2×10 <sup>-5</sup> | gi 1408312 gb AAB03674.1  dimethylglycine dehydrogenase-like protein                                                 | 31 | 5.9 | 30.09 | ⊙ |
| 2    | 1.7×10 <sup>-3</sup> | gi 24158900 pdb 1LUF A Chain A, Crystal Structure Of The Musk Tyrosine Kinase: Insights Into Receptor Autoregulation | 23 | 5.5 | 39.33 | ⊙ |
| 3    | 0.021                | gi 8547323 gb AAF76329.1  semaphorin [Rattus norvegicus]                                                             | 21 | 6.0 | 33.89 | ⊙ |
| +4   | 0.026                | gi 52345435 ref NP_037027.2  adenosine kinase [Rattus norvegicus]                                                    | 20 | 5.8 | 40.46 | ⊙ |
|      | -                    | gi 1906013 gb AAB50236.1  adenosine kinase [Rattus norvegicus]                                                       | 14 | 5.8 | 40.42 | ⊙ |
| 5    | 0.026                | gi 7242211 ref NP_037178.1  thyrotropin releasing hormone [Rattus norvegicus]                                        | 18 | 5.4 | 29.44 | ⊙ |
| 6    | 0.033                | gi 11024668 ref NP_067601.1  aryl hydrocarbon receptor-interacting protein-like 1 [Rattus norvegicus]                | 12 | 5.7 | 38.68 | ⊙ |
| +7   | 0.041                | gi 34810278 pdb 1OR8 A Chain A, Structure Of The Predominant Protein Arginine Methyltransferase Prmt1                | 29 | 5.5 | 39.77 | ⊙ |
|      | -                    | gi 31615892 pdb 1ORI A Chain A, Structure Of The Predominant Protein Arginine Methyltransferase Prmt1                | 29 | 5.5 | 40.13 | ⊙ |
|      | -                    | gi 53733398 gb AAH83550.1  Flot2 protein [Rattus norvegicus]                                                         | 16 | 5.3 | 38.81 | ⊙ |
|      | -                    | gi 4097589 gb AAD00120.1  R-Reggie-1.1                                                                               | 16 | 5.3 | 38.81 | ⊙ |
|      | -                    | gi 57528160 ref NP_001009619.1  nucleotide binding protein 1 [Rattus norvegicus]                                     | 21 | 5.7 | 34.65 | ⊙ |
|      | -                    | gi 45478210 gb AAS66276.1  LRRGT00185 [Rattus norvegicus]                                                            | 16 | 5.3 | 29.42 | ⊙ |
|      | -                    | gi 16758066 ref NP_445799.1  nuclear distribution gene E homolog 1 [Rattus norvegicus]                               | 17 | 5.3 | 38.62 | ⊙ |



gi|203826|gb|AAA41050.1| cytochrome P-450c17 (EC  
1.14.99.9)

35 5.2 26.97 

NOTE:

1. To search again using **unmatched masses**, click the symbol .
2. Highly similar protein sequences were given the same rank (click "+" to expand/contract).

**Input Summary**

**Search id** A8695475-11D0-A85AF707

**Sequences** 20076

**Date & Time** Mon Feb 05 02:43:06 2007 UTC (Search Time: 0.50 sec.)

**Sample ID**

**Database** NCBI nr [..\databases\nr]

**Taxonomy** Rattus

**Mass Range** 23 - 41 kDa

**pI Range** 5.2 -6.1

**Digestion** Trypsin

**Missed Cuts** 1

**Modifications** +C2H3ON@C(Complete); +NO2-H@Y(Partial); +O@M(Partial);

**Charge State** MH+

**Masses (avg)**

**Tolerance (avg)** 1.00 ppm

**Masses (mon)** 704.586 710.381 718.415 719.479 724.520 739.402 740.481  
743.412 748.702 749.475 754.454 763.440 768.465 774.424  
777.346 783.452 786.448 792.458 796.381 802.485 804.430  
810.661 811.465 817.473 822.461 826.362 833.396 834.367  
840.479 848.591 849.394 852.357 859.442 865.526 876.683  
878.477 888.494 891.484 897.519 903.495 913.552 919.601  
923.460 925.567 931.737 932.497 934.450 942.508 948.486  
953.590 959.541 962.523 981.548 987.480 991.522 997.612  
1003.570 1013.549 1014.534 1020.673 1022.458 1028.620  
1029.548 1040.588 1042.651 1051.643 1057.543 1062.538  
1067.698 1073.841 1074.503 1080.643 1087.600 1090.553  
1096.718 1098.612 1104.531 1105.649 1109.501 1115.584  
1118.552 1124.479 1132.572 1133.523 1138.627 1141.512

|          |          |          |          |          |          |
|----------|----------|----------|----------|----------|----------|
| 1147.682 | 1151.721 | 1157.598 | 1163.535 | 1169.557 | 1176.680 |
| 1186.604 | 1192.685 | 1202.630 | 1209.572 | 1211.609 | 1217.660 |
| 1219.634 | 1226.671 | 1233.776 | 1235.692 | 1242.847 | 1244.413 |
| 1245.672 | 1248.667 | 1255.645 | 1256.790 | 1263.647 | 1270.667 |
| 1285.537 | 1291.553 | 1304.331 | 1305.523 | 1312.853 | 1313.805 |
| 1320.571 | 1327.821 | 1329.686 | 1336.715 | 1339.817 | 1346.700 |
| 1353.774 | 1354.641 | 1362.083 | 1362.729 | 1365.687 | 1372.711 |
| 1379.478 | 1380.778 | 1391.027 | 1391.705 | 1398.569 | 1400.811 |
| 1402.701 | 1409.693 | 1413.790 | 1417.716 | 1424.568 | 1427.720 |
| 1431.410 | 1438.295 | 1438.806 | 1441.846 | 1444.838 | 1451.832 |
| 1454.064 | 1460.798 | 1467.727 | 1469.765 | 1482.802 | 1487.783 |
| 1491.732 | 1498.683 | 1504.709 | 1515.278 | 1516.772 | 1524.175 |
| 1524.832 | 1530.621 | 1537.846 | 1539.774 | 1543.792 | 1547.762 |
| 1555.187 | 1555.798 | 1557.657 | 1560.475 | 1570.705 | 1571.692 |
| 1579.870 | 1587.962 | 1588.767 | 1597.554 | 1606.825 | 1608.823 |
| 1613.904 | 1617.449 | 1625.881 | 1631.696 | 1640.820 | 1644.749 |
| 1653.828 | 1657.800 | 1660.872 | 1670.875 | 1677.984 | 1686.075 |
| 1688.868 | 1697.180 | 1697.762 | 1707.793 | 1715.927 | 1725.032 |
| 1732.031 | 1735.031 | 1737.921 | 1745.565 | 1753.620 | 1763.871 |
| 1765.794 | 1773.925 | 1783.865 | 1789.814 | 1796.943 | 1804.802 |
| 1812.964 | 1813.853 | 1820.973 | 1829.834 | 1833.927 | 1848.201 |
| 1851.184 | 1854.053 | 1864.885 | 1874.961 | 1875.835 | 1884.040 |
| 1885.882 | 1889.979 | 1892.820 | 1901.825 | 1910.911 | 1923.946 |
| 1926.073 | 1932.847 | 1941.028 | 1956.696 | 1968.989 | 1983.270 |
| 1994.022 | 2004.139 | 2007.970 | 2021.998 | 2033.645 | 2040.119 |
| 2047.061 | 2055.236 | 2066.825 | 2072.187 | 2094.259 | 2105.185 |
| 2114.621 | 2120.913 | 2129.949 | 2131.877 | 2137.074 | 2139.877 |
| 2150.078 | 2160.116 | 2169.110 | 2182.683 | 2184.194 | 2193.238 |
| 2196.046 | 2205.083 | 2208.057 | 2220.514 | 2222.229 | 2231.160 |
| 2235.235 | 2238.325 | 2247.225 | 2257.199 | 2267.099 | 2276.249 |
| 2280.268 | 2283.229 | 2292.186 | 2296.057 | 2308.242 | 2310.217 |
| 2320.167 | 2323.348 | 2336.322 | 2338.081 | 2343.099 | 2352.565 |
| 2356.324 | 2365.653 | 2367.324 | 2376.773 | 2379.073 | 2382.196 |
| 2392.103 | 2399.093 | 2408.341 | 2413.931 | 2420.356 | 2424.202 |
| 2433.498 | 2435.293 | 2445.410 | 2455.248 | 2466.510 | 2468.953 |
| 2481.320 | 2495.166 | 2499.239 | 2509.286 | 2519.995 | 2527.339 |
| 2537.306 | 2550.354 | 2565.142 | 2568.248 | 2582.402 | 2594.844 |
| 2606.079 | 2617.337 | 2622.683 | 2636.156 | 2641.070 | 2649.629 |
| 2663.484 | 2673.822 | 2676.191 | 2686.692 | 2689.417 | 2695.150 |



|          |          |          |          |          |          |
|----------|----------|----------|----------|----------|----------|
| 2707.511 | 2718.389 | 2724.364 | 2731.156 | 2742.717 | 2746.564 |
| 2758.476 | 2761.485 | 2774.529 | 2783.515 | 2794.510 | 2799.213 |
| 2808.453 | 2818.316 | 2821.250 | 2825.438 | 2831.279 | 2842.476 |
| 2854.162 | 2866.413 | 2873.560 | 2883.464 | 2888.604 | 2900.058 |
| 2904.450 | 2914.517 | 2925.658 | 2929.486 | 2942.409 | 2950.528 |
| 2965.589 | 2978.040 | 2985.177 | 2994.055 | 3006.492 | 3010.521 |
| 3015.143 | 3024.548 | 3036.787 | 3047.750 | 3052.737 | 3064.474 |
| 3078.775 | 3090.526 | 3095.247 | 3098.546 | 3110.596 | 3121.691 |
| 3128.207 | 3139.522 | 3146.510 | 3158.161 | 3161.607 | 3172.754 |
| 3177.652 | 3188.675 | 3199.870 | 3214.713 | 3219.336 | 3222.127 |
| 3234.569 | 3245.690 | 3253.564 | 3266.450 | 3271.765 | 3282.873 |
| 3286.349 | 3289.825 | 3292.763 | 3304.371 | 3315.379 | 3318.715 |
| 3324.773 | 3327.764 | 3337.838 | 3347.731 | 3353.932 | 3365.060 |
| 3368.696 | 3381.846 | 3393.178 | 3397.732 | 3410.899 | 3425.788 |
| 3429.692 | 3449.249 | 3461.525 | 3473.902 | 3479.820 | 3493.105 |
| 3506.136 | 3528.589 | 3541.165 | 3555.811 | 3558.624 | 3580.113 |
| 3627.545 | 3646.149 | 3670.715 | 3687.547 | 3691.843 |          |

**Tolerance** 14.00 ppm  
**(mon)**

**Number of** 421  
**Peptides**

# Laboratory of Mass Spectrometry and Gaseous Ion Chemistry

## PROWL

- ▶ **ProFound**
- ▶ **ProteinInfo**
- ▶ **PeptideMap**
- ▶ **PepFrag**
- ▶ **X! Tandem**
- ▶ **X! Hunter**
- ▶ **GPMDDB**
- ▶ **PROWL Home**
- ▶ **Chait Lab**

## ProFound



### Protein Candidates

| Rank | Expectation          | Protein Information and Sequence Analyse Tools (T)                                                                                                                  | %  | pI  | kDa   | R |
|------|----------------------|---------------------------------------------------------------------------------------------------------------------------------------------------------------------|----|-----|-------|---|
| 1    | 8.9×10 <sup>-7</sup> | gi 25282455 ref NP_741987.1  3(2),5-bisphosphate nucleotidase [Rattus norvegicus]                                                                                   | 30 | 5.6 | 33.50 | ● |
| 2    | 1.5×10 <sup>-6</sup> | gi 1381643 gb AAB02722.1  cysteine protease p32-beta [Rattus norvegicus]                                                                                            | 44 | 5.7 | 30.10 | ● |
| 3    | 1.4×10 <sup>-5</sup> | gi 34859703 ref XP_215664.2  PREDICTED: similar to Breast carcinoma amplified sequence 2 homolog (DNA amplified in mammary carcinoma 1 protein) [Rattus norvegicus] | 42 | 5.5 | 26.20 | ● |
| 4    | 3.0×10 <sup>-5</sup> | gi 547791 sp P36374 KLK8_RAT Prostatic glandular kallikrein-8 precursor (Tissue kallikrein) (P1 kallikrein) (RGK-8)                                                 | 35 | 5.6 | 29.57 | ● |
| 5    | 4.1×10 <sup>-5</sup> | gi 12083641 ref NP_073180.1  synaptosomal-associated protein 23 [Rattus norvegicus]                                                                                 | 43 | 4.8 | 23.50 | ● |
| +6   | 1.2×10 <sup>-4</sup> | gi 3341891 dbj BAA31863.1  RT1-DOb [Rattus norvegicus]                                                                                                              | 35 | 5.0 | 30.84 | ● |
|      | -                    | gi 57012350 ref NP_001008846.1  RT1 class II, locus DOB [Rattus norvegicus]                                                                                         | 29 | 5.0 | 30.81 | ● |
| 7    | 1.5×10 <sup>-3</sup> | gi 50925623 gb AAH79028.1  Leucine rich repeat containing 23 [Rattus norvegicus]                                                                                    | 39 | 5.1 | 33.76 | ● |
| +8   | 2.5×10 <sup>-3</sup> | gi 14192925 ref NP_062004.1  tropomyosin 1, alpha isoform f [Rattus norvegicus]                                                                                     | 24 | 4.8 | 28.91 | ● |
|      | -                    | gi 112448 pir  A22165 tropomyosin alpha chain, smooth muscle - rat                                                                                                  | 26 | 4.9 | 32.24 | ● |
| 9    | 4.2×10 <sup>-3</sup> | gi 53733481 gb AAH83676.1  Similar to mage-k1 [Rattus norvegicus]                                                                                                   | 37 | 5.5 | 34.83 | ● |
|      | -                    | gi 55778318 gb AAH86598.1  Acyl-Coenzyme A binding domain containing 6 [Rattus norvegicus]                                                                          | 28 | 4.9 | 31.25 | ● |
|      | -                    | gi 16758348 ref NP_446028.1  peroxiredoxin 6 [Rattus norvegicus]                                                                                                    | 34 | 5.6 | 24.86 | ● |

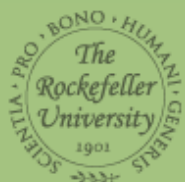

The Rockefeller University  
1230 York Avenue,  
New York, NY 10021  
(212) 327-8000



**National Center for  
Research Resources**

National Resource  
for the Mass Spectrometric  
Analysis of Biological  
Macromolecules

|   |                                                                                                                                                                |    |     |       |  |
|---|----------------------------------------------------------------------------------------------------------------------------------------------------------------|----|-----|-------|--|
| - | <a href="#">gi 13928740 ref NP_113734.1 </a> regucalcin [Rattus norvegicus]                                                                                    | 35 | 5.3 | 33.94 |  |
| - | <a href="#">gi 408807 dbj BAA07490.1 </a> regucalcin [Rattus norvegicus]                                                                                       | 35 | 5.4 | 33.94 |  |
| - | <a href="#">gi 34874480 ref XP_236938.2 </a> PREDICTED: similar to CG31803-PA [Rattus norvegicus]                                                              | 33 | 5.3 | 31.26 |  |
| - | <a href="#">gi 56970492 gb AAH88458.1 </a> Similar to RIKEN cDNA 2700085E05 [Rattus norvegicus]                                                                | 28 | 5.1 | 33.53 |  |
| - | <a href="#">gi 1711602 sp P49890 ST1E6_RAT</a> Estrogen sulfotransferase, isoform 6 (EST-6) (Sulfotransferase, estrogen-preferring) (Estrone sulfotransferase) | 27 | 5.6 | 35.63 |  |

## NOTE:

1. To search again using **unmatched masses**, click the symbol .
2. Highly similar protein sequences were given the same rank (click "+" to expand/contract).

**Input Summary****Search id** AEE2C6FA-0B54-AFAD68C4**Sequences** 20076**Date & Time** Wed Feb 07 01:38:58 2007 UTC (Search Time: 0.53 sec.)**Sample ID****Database** NCBI nr [..\databases\nr]**Taxonomy** Rattus**Mass Range** 23 - 36 kDa**pI Range** 4.8 -5.7**Digestion** Trypsin**Missed Cuts** 1**Modifications** +C2H3ON@C(Complete); +O@M(Partial); +HPO3@STY(Partial);**Charge State** MH+**Masses (avg)****Tolerance (avg)** 1.00 ppm

**Masses (mon)** 704.568 710.433 718.448 719.512 724.335 725.439 733.375  
737.349 741.463 743.478 748.455 753.412 754.353 757.440  
762.408 767.392 774.375 779.473 785.360 786.397 789.436  
794.603 796.518 798.513 804.739 813.442 817.398 819.476  
825.494 831.475 832.464 836.875 840.478 848.648 850.550  
858.493 877.515 880.526 888.528 890.514 898.500 904.620  
905.470 918.470 932.426 935.509 941.527 942.518 947.563  
953.619 954.575 961.363 963.095 967.588 969.556 975.514  
981.554 988.585 989.537 995.535 1002.530 1018.570  
1020.589 1025.560 1031.817 1032.574 1037.531 1043.694  
1051.664 1056.535 1060.563 1066.509 1067.520 1080.573  
1081.547 1087.973 1088.550 1091.526 1094.641 1100.615  
1107.657 1113.667 1119.445 1120.008 1120.548 1125.667  
1131.634 1135.735 1147.284 1150.636 1155.549 1161.641  
1162.650 1165.750 1167.634 1174.704 1176.572 1186.588  
1191.669 1192.668 1209.599 1210.653 1218.579 1220.648  
1228.371 1233.636 1240.689 1247.692 1251.688 1254.642  
1259.414 1262.568 1264.673 1268.721 1276.427 1284.518  
1291.401 1292.877 1303.716 1304.737 1309.700 1316.553  
1319.656 1321.661 1324.672 1331.687 1332.694 1339.484  
1348.662 1350.714 1358.690 1361.570 1365.645 1372.419  
1374.788 1381.609 1390.730 1394.724 1401.771 1404.720  
1411.641 1415.538 1422.510 1423.602 1430.670 1433.829  
1440.718 1444.732 1451.776 1458.605 1459.762 1466.843  
1470.893 1479.760 1487.304 1489.616 1497.966 1500.599  
1503.834 1515.734 1522.713 1529.049 1535.716 1542.740  
1547.715 1556.147 1558.140 1565.242 1566.015 1569.720  
1576.715 1584.476 1585.735 1589.759 1598.090 1598.682  
1607.037 1610.115 1618.553 1619.718 1624.842 1628.807  
1633.810 1642.719 1644.876 1649.821 1655.787 1658.747  
1661.874 1670.338 1671.934 1676.837 1679.816 1684.703  
1693.834 1695.830 1708.217 1708.801 1712.839 1725.316  
1727.778 1733.800 1741.827 1742.698 1749.872 1752.633  
1760.364 1763.869 1773.241 1782.979 1783.832 1791.888  
1800.448 1801.877 1804.908 1811.751 1819.899 1824.095  
1829.851 1838.155 1847.925 1853.545 1857.953 1865.914  
1869.552 1874.825 1882.938 1885.979 1895.934 1905.034  
1913.154 1916.867 1922.974 1931.044 1939.753 1949.077  
1951.961 1963.641 1970.241 1972.932 1982.875 1992.933

|          |          |          |          |          |          |
|----------|----------|----------|----------|----------|----------|
| 2001.992 | 2011.948 | 2019.294 | 2025.048 | 2037.219 | 2041.933 |
| 2058.031 | 2067.851 | 2072.293 | 2074.961 | 2092.792 | 2096.183 |
| 2106.494 | 2116.025 | 2128.932 | 2130.424 | 2135.339 | 2144.218 |
| 2151.709 | 2161.029 | 2168.173 | 2182.812 | 2191.853 | 2193.934 |
| 2203.030 | 2208.090 | 2220.641 | 2228.011 | 2234.119 | 2238.228 |
| 2247.191 | 2257.036 | 2260.077 | 2269.854 | 2274.252 | 2282.161 |
| 2291.116 | 2308.106 | 2310.890 | 2315.134 | 2324.055 | 2338.235 |
| 2342.177 | 2352.589 | 2355.170 | 2364.332 | 2367.314 | 2376.204 |
| 2381.396 | 2385.012 | 2394.365 | 2398.948 | 2408.427 | 2413.984 |
| 2425.217 | 2434.316 | 2438.405 | 2442.066 | 2454.098 | 2465.692 |
| 2467.800 | 2477.615 | 2483.285 | 2493.299 | 2503.636 | 2507.177 |
| 2510.045 | 2520.519 | 2524.444 | 2530.201 | 2538.002 | 2549.146 |
| 2563.179 | 2568.127 | 2578.003 | 2580.534 | 2590.400 | 2594.208 |
| 2597.366 | 2610.429 | 2622.733 | 2630.985 | 2640.982 | 2644.826 |
| 2660.197 | 2666.247 | 2672.478 | 2685.066 | 2695.304 | 2704.021 |
| 2707.771 | 2718.368 | 2722.480 | 2733.248 | 2737.088 | 2749.474 |
| 2759.269 | 2769.932 | 2781.078 | 2783.636 | 2793.669 | 2799.727 |
| 2809.718 | 2816.149 | 2824.021 | 2833.768 | 2840.299 | 2845.688 |
| 2861.524 | 2868.448 | 2877.332 | 2885.469 | 2896.953 | 2903.412 |
| 2911.514 | 2921.447 | 2923.559 | 2935.301 | 2941.583 | 2951.385 |
| 2955.412 | 2964.576 | 2975.518 | 2992.374 | 2995.361 | 2998.053 |
| 3008.095 | 3010.460 | 3014.381 | 3020.339 | 3030.233 | 3033.869 |
| 3039.141 | 3049.885 | 3054.463 | 3058.001 | 3067.210 | 3078.377 |
| 3081.480 | 3093.722 | 3105.951 | 3110.533 | 3118.429 | 3125.544 |
| 3136.966 | 3140.703 | 3145.463 | 3159.080 | 3164.497 | 3177.281 |
| 3187.543 | 3198.887 | 3207.352 | 3218.502 | 3230.820 | 3237.602 |
| 3241.206 | 3252.299 | 3259.526 | 3266.568 | 3277.396 | 3281.871 |
| 3294.193 | 3308.088 | 3319.877 | 3332.853 | 3347.101 | 3358.100 |
| 3365.286 | 3371.306 | 3383.677 | 3391.360 | 3399.485 | 3411.867 |
| 3416.354 | 3427.622 | 3433.698 | 3445.865 | 3458.765 | 3475.978 |
| 3483.407 | 3497.134 | 3502.752 | 3505.662 | 3516.517 | 3524.828 |
| 3534.751 | 3540.959 | 3556.806 | 3560.422 | 3573.331 | 3587.717 |
| 3590.379 | 3600.473 | 3606.780 | 3620.461 | 3625.041 | 3631.327 |
| 3648.917 | 3655.550 | 3660.314 | 3670.953 | 3686.226 | 3700.054 |

**Tolerance** 24.00 ppm  
**(mon)**

**Number of** 446  
**Peptides**





# Laboratory of Mass Spectrometry and Gaseous Ion Chemistry

## PROWL

- **ProFound**
- **ProteinInfo**
- **PeptideMap**
- **PepFrag**
- **X! Tandem**
- **X! Hunter**
- **GPMDDB**
- **PROWL Home**
- **Chait Lab**

## ProFound



### Protein Candidates

| Rank | Expectation          | Protein Information and Sequence Analyse Tools (T)                                                                                                                                                                                                                         | %  | pI  | kDa   | R |
|------|----------------------|----------------------------------------------------------------------------------------------------------------------------------------------------------------------------------------------------------------------------------------------------------------------------|----|-----|-------|---|
| +1   | 6.3×10 <sup>-4</sup> | gi 127764 sp P04462 MYH8_RAT Myosin-8 (Myosin heavy chain, skeletal muscle, perinatal) (MyHC-perinatal)                                                                                                                                                                    | 61 | 6.4 | 29.83 | ⊙ |
|      | -                    | gi 5802178 gb AAD51613.1 AF157005_1 type 2X myosin heavy chain [Rattus norvegicus]                                                                                                                                                                                         | 50 | 8.0 | 21.33 | ⊙ |
| 2    | 1.7×10 <sup>-3</sup> | gi 50925831 gb AAH79271.1  Similar to Glutathione S-transferase A1 (GTH1) (HA subunit 1) (GST-epsilon) (GSTA1-1) (GST class-alpha) [Rattus norvegicus]                                                                                                                     | 47 | 5.9 | 25.79 | ⊙ |
| 3    | 2.0×10 <sup>-3</sup> | gi 56789734 gb AAH88443.1  Similar to RAB19, member RAS oncogene family [Rattus norvegicus]                                                                                                                                                                                | 51 | 6.1 | 24.66 | ⊙ |
| 4    | 2.2×10 <sup>-3</sup> | gi 13124592 sp Q9JI51 VTI1A_RAT Vesicle transport through interaction with t-SNAREs homolog 1A (Vesicle transport v-SNARE protein Vti1-like 2) (Vti1-rp2)                                                                                                                  | 59 | 6.1 | 26.02 | ⊙ |
| 5    | 5.8×10 <sup>-3</sup> | gi 205755 gb AAC42095.1  neuronal protein                                                                                                                                                                                                                                  | 60 | 6.5 | 24.98 | ⊙ |
| 6    | 5.8×10 <sup>-3</sup> | gi 34871064 ref XP_220574.2  PREDICTED: similar to Sperm-associated antigen 7 [Rattus norvegicus]                                                                                                                                                                          | 69 | 6.9 | 26.12 | ⊙ |
| 7    | 6.4×10 <sup>-3</sup> | gi 2039340 gb AAB52995.1  putative RNA binding protein 1 [Rattus norvegicus]                                                                                                                                                                                               | 49 | 6.4 | 20.68 | ⊙ |
|      | -                    | gi 34878180 ref XP_214617.2  PREDICTED: similar to potassium channel tetramerisation domain containing 1 [Rattus norvegicus]                                                                                                                                               | 50 | 6.6 | 29.70 | ⊙ |
|      | -                    | gi 203822 gb AAA41048.1  cytochrome PB24                                                                                                                                                                                                                                   | 41 | 6.1 | 22.55 | ⊙ |
|      | -                    | gi 34877568 ref XP_343617.1  PREDICTED: similar to Eukaryotic translation initiation factor 4E type 3 (eIF4E type 3) (eIF-4E type 3) (mRNA cap-binding protein type 3) (Eukaryotic translation initiation factor 4E-like 3) (eIF4E-like protein 4E-LP) [Rattus norvegicus] | 42 | 6.7 | 26.58 | ⊙ |



The Rockefeller University  
1230 York Avenue,  
New York, NY 10021  
(212) 327-8000

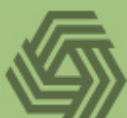

**National Center for  
Research Resources**

National Resource  
for the Mass Spectrometric  
Analysis of Biological  
Macromolecules

|   |                                                                                                                                                                                   |    |     |       |  |
|---|-----------------------------------------------------------------------------------------------------------------------------------------------------------------------------------|----|-----|-------|--|
| - | <a href="#">gi 13592152 ref NP_112416.1</a>   glutathione S-transferase, mu type 3 [Rattus norvegicus]                                                                            | 56 | 6.9 | 25.83 |  |
| - | <a href="#">gi 50054216 ref NP_113950.2</a>   cyclin-dependent kinase inhibitor 1B (p27, kip1) [Rattus norvegicus]                                                                | 61 | 6.5 | 22.35 |  |
| - | <a href="#">gi 56605778 ref NP_001008352.1</a>   hypothetical protein LOC309681 [Rattus norvegicus]                                                                               | 53 | 6.6 | 28.39 |  |
| - | <a href="#">gi 7767104 pdb 1DVG A</a> Chain A, Crystal Structure Of Rat Heme Oxygenase-1 In Complex With Heme; Seleleno-Methionine Derivative, Mutated At M51t,M93I, M155I,M191I. | 48 | 6.0 | 29.89 |  |
| - | <a href="#">gi 57870410 gb AAH89059.1</a>   Transmembrane protein 17 [Rattus norvegicus]                                                                                          | 28 | 5.9 | 22.65 |  |
| - | <a href="#">gi 2281010 dbj BAA21561.1</a>   p27 [Rattus norvegicus]                                                                                                               | 60 | 6.5 | 22.32 |  |
| - | <a href="#">gi 13786152 ref NP_112618.1</a>   B-cell CLL/lymphoma 10 [Rattus norvegicus]                                                                                          | 33 | 5.9 | 26.27 |  |
| - | <a href="#">gi 205630 gb AAA41670.1</a>   Na,K-ATPase alpha-1 subunit                                                                                                             | 26 | 7.0 | 27.34 |  |
| - | <a href="#">gi 6093966 sp P56700 RGS16_RAT</a> Regulator of G-protein signaling 16 (RGS16) (Retinally abundant regulator of G-protein signaling) (RGS-R)                          | 32 | 8.0 | 22.61 |  |

## NOTE:

1. To search again using **unmatched masses**, click the symbol .
2. Highly similar protein sequences were given the same rank (click "+" to expand/contract).

**Input Summary****Search id** B2114EE3-0828-B20300AF**Sequences** 20076**Date & Time** Mon Feb 05 03:48:04 2007 UTC (Search Time: 0.53 sec.)**Sample ID****Database** NCBI nr [..\databases\nr]**Taxonomy** Rattus**Mass Range** 20 - 30 kDa**pI Range** 5.8 -8.0**Digestion** Trypsin**Missed Cuts** 1

**Modifications** +C2H3ON@C(Complete); +O@M(Partial); +HPO3@SY(Partial);

**Charge State** MH+

**Masses (avg)**

**Tolerance (avg)** 1.00 ppm

**Masses (mon)** 711.414 712.258 718.407 719.489 724.439 725.398 733.424  
740.415 741.422 743.437 748.708 749.425 750.438 754.422  
764.391 768.412 775.436 776.391 778.473 785.430 786.429  
792.399 796.493 798.487 804.446 813.455 819.469 824.501  
825.486 831.293 836.867 841.484 854.527 862.488 864.504  
879.459 889.440 890.503 902.505 905.478 907.503 917.540  
920.497 933.501 934.508 946.534 960.555 961.514 966.568  
974.531 975.476 978.546 988.546 994.625 1002.725 1003.577  
1004.558 1014.496 1020.548 1021.515 1024.614 1030.544  
1040.524 1042.564 1051.664 1054.590 1060.562 1066.552  
1068.618 1085.575 1088.681 1091.569 1098.604 1102.577  
1109.626 1115.640 1117.641 1119.531 1125.595 1133.600  
1139.838 1143.635 1150.608 1151.750 1158.610 1167.559  
1174.605 1182.598 1185.562 1192.638 1199.596 1208.562  
1209.639 1213.573 1220.616 1227.632 1231.643 1238.738  
1239.615 1242.649 1250.656 1258.689 1261.698 1263.659  
1270.630 1272.670 1276.682 1279.304 1286.704 1289.627  
1292.673 1303.730 1305.602 1312.785 1320.599 1324.687  
1331.652 1338.734 1343.688 1350.876 1351.643 1354.639  
1362.676 1368.645 1375.726 1382.674 1390.694 1393.707  
1396.674 1403.776 1407.687 1411.680 1418.592 1419.631  
1422.676 1425.698 1431.397 1438.714 1439.710 1446.742  
1454.124 1454.766 1461.731 1465.723 1469.720 1476.798  
1482.727 1490.747 1496.730 1504.735 1510.747 1517.793  
1519.577 1525.749 1532.724 1535.387 1542.755 1543.733  
1547.782 1549.398 1557.729 1558.766 1563.420 1571.789  
1578.869 1581.839 1586.796 1593.964 1598.778 1600.824  
1608.780 1614.833 1617.432 1625.916 1633.907 1639.817  
1643.827 1645.465 1653.229 1653.859 1657.941 1660.848  
1663.482 1672.748 1675.806 1684.858 1688.784 1697.815  
1705.786 1714.807 1724.858 1729.838 1733.845 1741.844  
1742.940 1745.526 1754.849 1757.755 1764.876 1772.917  
1784.787 1790.879 1796.925 1801.865 1810.880 1811.911  
1815.926 1820.807 1827.910 1836.844 1847.913 1849.824



|          |          |          |          |          |          |
|----------|----------|----------|----------|----------|----------|
| 1856.926 | 1866.891 | 1875.075 | 1875.892 | 1879.860 | 1892.053 |
| 1895.189 | 1898.972 | 1904.639 | 1915.940 | 1919.036 | 1926.891 |
| 1931.889 | 1940.956 | 1949.985 | 1973.038 | 1990.845 | 1994.001 |
| 2004.931 | 2028.185 | 2035.926 | 2058.015 | 2098.107 | 2103.972 |
| 2108.051 | 2111.114 | 2120.065 | 2125.030 | 2133.918 | 2136.003 |
| 2139.926 | 2149.563 | 2152.125 | 2161.038 | 2170.126 | 2182.159 |
| 2185.180 | 2192.175 | 2194.951 | 2204.079 | 2207.337 | 2220.964 |
| 2229.987 | 2232.055 | 2235.206 | 2245.183 | 2258.159 | 2268.124 |
| 2277.178 | 2280.039 | 2283.192 | 2292.212 | 2296.341 | 2308.201 |
| 2317.432 | 2337.156 | 2346.314 | 2350.231 | 2359.317 | 2363.114 |
| 2367.143 | 2376.393 | 2379.185 | 2382.142 | 2391.257 | 2395.146 |
| 2404.417 | 2407.292 | 2410.234 | 2420.230 | 2424.076 | 2434.234 |
| 2443.282 | 2448.145 | 2452.146 | 2455.283 | 2464.470 | 2474.143 |
| 2477.226 | 2481.150 | 2492.302 | 2495.228 | 2506.007 | 2507.255 |
| 2510.224 | 2523.098 | 2533.361 | 2537.159 | 2549.286 | 2552.280 |
| 2562.329 | 2567.241 | 2577.320 | 2591.600 | 2597.329 | 2609.944 |
| 2623.279 | 2635.126 | 2638.412 | 2651.299 | 2662.271 | 2667.348 |
| 2678.458 | 2682.050 | 2695.288 | 2707.437 | 2719.403 | 2723.233 |
| 2734.388 | 2746.554 | 2756.660 | 2773.309 | 2778.916 | 2783.464 |
| 2796.487 | 2809.469 | 2821.228 | 2825.309 | 2837.496 | 2840.224 |
| 2852.767 | 2857.339 | 2883.360 | 2895.419 | 2904.270 | 2914.626 |
| 2925.036 | 2937.473 | 2942.185 | 2960.667 | 2968.259 | 2979.905 |
| 2983.252 | 2993.232 | 3007.807 | 3021.197 | 3031.387 | 3041.707 |
| 3048.622 | 3059.231 | 3062.884 | 3066.390 | 3075.461 | 3086.529 |
| 3089.411 | 3093.457 | 3105.120 | 3108.424 | 3111.729 | 3122.712 |
| 3124.745 | 3136.542 | 3139.637 | 3143.224 | 3155.510 | 3166.607 |
| 3171.423 | 3177.724 | 3188.783 | 3201.387 | 3208.365 | 3220.281 |
| 3232.487 | 3243.526 | 3255.007 | 3264.776 | 3278.030 | 3288.799 |
| 3292.702 | 3303.843 | 3314.383 | 3325.677 | 3338.508 | 3346.920 |
| 3353.938 | 3364.987 | 3368.661 | 3381.536 | 3392.551 | 3399.067 |
| 3410.779 | 3413.966 | 3429.411 | 3444.061 | 3454.742 | 3478.298 |
| 3509.390 | 3562.536 | 3589.076 | 3614.783 | 3638.753 | 3647.655 |
| 3653.351 |          |          |          |          |          |

**Tolerance** 43.00 ppm  
**(mon)**

**Number of** 405  
**Peptides**

# Laboratory of Mass Spectrometry and Gaseous Ion Chemistry

## PROWL

- **ProFound**
- **ProteinInfo**
- **PeptideMap**
- **PepFrag**
- **X! Tandem**
- **X! Hunter**
- **GPMDDB**
- **PROWL Home**
- **Chait Lab**



The Rockefeller University  
1230 York Avenue,  
New York, NY 10021  
(212) 327-8000



**National Center for  
Research Resources**

National Resource  
for the Mass Spectrometric  
Analysis of Biological  
Macromolecules

## ProFound



### Protein Candidates

| Rank | Expectation          | Protein Information and Sequence Analyse Tools (T)                                                                                  | %  | pI  | kDa   | R |
|------|----------------------|-------------------------------------------------------------------------------------------------------------------------------------|----|-----|-------|---|
| +1   | 1.3×10 <sup>-8</sup> | gi 13124118 sp Q9Z1E1 FLOT1_RAT Flotillin-1 (Reggie-2) (REG-2)                                                                      | 20 | 6.7 | 47.77 | ⊙ |
| -    | -                    | gi 40352785 gb AAH64652.1  Flot1 protein [Rattus norvegicus]                                                                        | 20 | 6.7 | 47.78 | ⊙ |
| -    | -                    | gi 38454312 ref NP_942084.1  basic leucine zipper and W2 domains 1 [Rattus norvegicus]                                              | 17 | 5.7 | 48.20 | ⊙ |
| -    | -                    | gi 42559550 sp Q8R5K6 TOB1_RAT Tob1 protein (Transducer of erbB-2 1)                                                                | 15 | 6.2 | 40.56 | ⊙ |
| -    | -                    | gi 16758932 ref NP_446462.1  neuraminidase 3 [Rattus norvegicus]                                                                    | 17 | 5.8 | 48.22 | ⊙ |
| -    | -                    | gi 34857271 ref XP_214979.2  PREDICTED: similar to alpha/beta hydrolase fold protein [Rattus norvegicus]                            | 13 | 6.2 | 49.12 | ⊙ |
| -    | -                    | gi 204052 gb AAA41123.1  extracellular signal-regulated kinase 1                                                                    | 13 | 6.0 | 42.37 | ⊙ |
| -    | -                    | gi 204054 gb AAA63486.1  extracellular-signal-regulated kinase 1 [Rattus norvegicus]                                                | 12 | 6.0 | 42.82 | ⊙ |
| -    | -                    | gi 515499 gb AAA20009.1  microtubule-associated protein-2 kinase                                                                    | 13 | 6.2 | 42.46 | ⊙ |
| -    | -                    | gi 8393331 ref NP_059043.1  protein kinase, mitogen activated 3 (extracellular-signal-regulated kinase 1, ERK1) [Rattus norvegicus] | 12 | 6.0 | 43.31 | ⊙ |
| -    | -                    | gi 8050445 gb AAF71666.1 AF155236_1 extracellular signal-regulated kinase 1b [Rattus norvegicus]                                    | 11 | 6.4 | 46.11 | ⊙ |
| -    | -                    | gi 56090367 ref NP_001007633.1  activating signal cointegrator 1 complex subunit 1 [Rattus norvegicus]                              | 11 | 6.0 | 41.45 | ⊙ |

NOTE:

1. To search again using **unmatched masses**, click the symbol .
2. Highly similar protein sequences were given the same rank (click "+" to expand/contract).

### Input Summary

**Search id** A7A35260-1294-57C51DD9

**Sequences** 20076

**Date & Time** Tue Feb 06 15:13:16 2007 UTC (Search Time: 0.44 sec.)

**Sample ID**

**Database** NCBI nr [..\databases\nr]

**Taxonomy** Rattus

**Mass Range** 40 - 52 kDa

**pI Range** 5.7 -7.0

**Digestion** Trypsin

**Missed Cuts** 1

**Modifications** +C2H3ON@C(Complete);

**Charge State** MH+

**Masses (avg)**

**Tolerance (avg)** 1.00 ppm

**Masses (mon)** 702.579 709.274 714.401 716.414 718.286 721.332 729.349  
 735.387 736.298 740.333 747.243 753.280 755.070 763.477  
 764.239 770.363 778.574 780.206 786.130 787.110 794.254  
 798.294 800.213 804.134 805.106 811.201 812.331 816.628  
 818.107 822.111 827.999 834.064 836.628 844.032 849.940  
 850.567 856.282 858.013 861.324 864.009 869.729 875.985  
 880.188 885.961 890.127 891.973 898.047 899.478 904.101  
 909.992 911.737 918.122 919.936 926.186 931.000 937.164  
 941.099 943.865 950.133 956.069 958.399 965.113 966.178  
 972.143 978.253 981.915 986.281 992.118 992.944 1001.990  
 1005.227 1006.976 1012.873 1016.879 1019.990 1025.796  
 1027.843 1033.823 1034.839 1040.796 1047.031 1049.557  
 1050.341 1056.015 1056.627 1057.239 1059.733 1064.773  
 1070.486 1071.278 1073.282 1076.765 1082.797 1088.935  
 1091.244 1092.044 1098.230 1103.943 1106.581 1109.088  
 1115.300 1121.822 1131.641 1133.022 1138.983 1145.301  
 1152.344 1157.944 1163.970 1164.957 1174.295 1176.739

|          |          |          |          |          |          |
|----------|----------|----------|----------|----------|----------|
| 1185.499 | 1189.856 | 1193.037 | 1201.904 | 1205.637 | 1213.871 |
| 1215.723 | 1222.910 | 1223.662 | 1231.485 | 1235.194 | 1238.860 |
| 1246.708 | 1247.587 | 1256.130 | 1257.180 | 1259.565 | 1261.524 |
| 1265.588 | 1274.457 | 1285.285 | 1287.094 | 1295.142 | 1301.104 |
| 1303.094 | 1307.517 | 1315.019 | 1317.019 | 1320.488 | 1327.561 |
| 1335.563 | 1336.079 | 1340.509 | 1344.723 | 1349.636 | 1361.524 |
| 1370.474 | 1373.165 | 1382.928 | 1392.953 | 1397.828 | 1406.114 |
| 1413.970 | 1423.903 | 1425.554 | 1427.840 | 1434.585 | 1436.420 |
| 1443.747 | 1444.411 | 1449.734 | 1457.351 | 1459.227 | 1469.009 |
| 1473.756 | 1477.400 | 1484.624 | 1486.932 | 1490.098 | 1497.482 |
| 1504.494 | 1505.564 | 1512.411 | 1514.217 | 1522.186 | 1523.104 |
| 1525.180 | 1533.678 | 1541.275 | 1545.610 | 1552.415 | 1554.430 |
| 1558.917 | 1567.748 | 1570.067 | 1572.894 | 1579.625 | 1581.177 |
| 1585.031 | 1592.970 | 1596.006 | 1599.663 | 1607.126 | 1616.094 |
| 1624.354 | 1627.256 | 1636.661 | 1638.213 | 1640.175 | 1647.922 |
| 1655.798 | 1659.771 | 1668.582 | 1670.644 | 1681.773 | 1690.642 |
| 1696.208 | 1705.782 | 1706.727 | 1714.798 | 1716.136 | 1720.711 |
| 1728.954 | 1732.902 | 1741.372 | 1749.721 | 1751.692 | 1756.145 |
| 1764.869 | 1765.406 | 1774.040 | 1779.571 | 1789.179 | 1796.987 |
| 1799.669 | 1802.868 | 1811.851 | 1819.852 | 1822.321 | 1830.115 |
| 1838.213 | 1847.544 | 1851.306 | 1856.580 | 1864.824 | 1867.440 |
| 1875.476 | 1879.908 | 1887.912 | 1890.895 | 1898.277 | 1907.466 |
| 1914.203 | 1917.060 | 1925.467 | 1930.638 | 1939.460 | 1947.144 |
| 1960.442 | 1969.212 | 1979.290 | 1987.053 | 1995.402 | 1997.777 |
| 2007.838 | 2017.197 | 2031.490 | 2034.768 | 2044.769 | 2047.265 |
| 2058.640 | 2062.398 | 2071.272 | 2074.796 | 2080.042 | 2090.338 |
| 2091.353 | 2100.536 | 2103.128 | 2110.760 | 2120.295 | 2121.720 |
| 2126.870 | 2138.309 | 2145.536 | 2153.056 | 2162.906 | 2167.291 |
| 2176.261 | 2177.424 | 2180.346 | 2189.659 | 2200.445 | 2204.867 |
| 2215.754 | 2221.778 | 2232.324 | 2234.455 | 2239.486 | 2248.733 |
| 2251.096 | 2256.528 | 2266.420 | 2271.775 | 2275.177 | 2278.357 |
| 2290.293 | 2295.741 | 2302.260 | 2305.847 | 2315.490 | 2321.454 |
| 2333.665 | 2343.985 | 2347.571 | 2357.170 | 2359.524 | 2369.279 |
| 2379.283 | 2382.108 | 2391.843 | 2401.697 | 2404.304 | 2408.630 |
| 2413.125 | 2424.515 | 2430.187 | 2437.227 | 2448.307 | 2451.706 |
| 2462.484 | 2471.646 | 2480.892 | 2485.387 | 2489.786 | 2493.415 |
| 2504.488 | 2508.195 | 2512.647 | 2524.540 | 2526.637 | 2530.056 |
| 2542.160 | 2552.183 | 2562.328 | 2566.010 | 2570.446 | 2583.193 |
| 2596.177 | 2600.536 | 2605.001 | 2612.497 | 2622.348 | 2632.321 |

|          |          |          |          |          |          |
|----------|----------|----------|----------|----------|----------|
| 2638.300 | 2645.325 | 2659.159 | 2664.369 | 2676.058 | 2680.657 |
| 2688.052 | 2696.646 | 2709.387 | 2715.664 | 2719.068 | 2723.528 |
| 2733.410 | 2743.874 | 2746.449 | 2750.614 | 2761.041 | 2767.766 |
| 2778.651 | 2782.592 | 2790.054 | 2801.517 | 2813.111 | 2818.327 |
| 2828.344 | 2836.657 | 2851.162 | 2854.003 | 2857.708 | 2870.067 |
| 2873.097 | 2884.476 | 2888.455 | 2899.321 | 2904.761 | 2919.258 |
| 2924.462 | 2935.176 | 2939.956 | 2953.259 | 2961.313 | 2972.058 |
| 2982.418 | 2986.390 | 2991.469 | 3003.707 | 3009.614 | 3020.445 |
| 3022.666 | 3035.375 | 3045.473 | 3055.810 | 3059.719 | 3070.790 |
| 3085.694 | 3101.608 | 3113.168 | 3118.354 | 3128.625 | 3149.296 |
| 3152.583 | 3157.953 | 3169.692 | 3172.384 | 3176.746 | 3191.030 |
| 3195.823 | 3206.526 | 3215.759 | 3226.686 | 3240.123 | 3250.478 |
| 3265.618 | 3275.936 | 3284.225 | 3290.053 | 3300.951 | 3311.829 |
| 3324.159 | 3337.408 | 3348.968 | 3368.435 | 3374.298 | 3385.217 |
| 3388.742 | 3395.407 | 3398.114 | 3410.368 | 3425.637 | 3437.270 |
| 3443.824 | 3457.861 | 3468.992 | 3483.279 | 3487.134 | 3496.879 |
| 3507.953 | 3510.385 | 3522.359 | 3536.194 | 3541.840 | 3553.626 |
| 3564.869 | 3578.385 | 3585.152 | 3600.562 | 3607.148 | 3622.767 |
| 3635.173 | 3649.186 | 3654.513 | 3670.560 | 3683.701 | 3688.440 |

**Tolerance** 22.00 ppm  
**(mon)**

**Number of** 460  
**Peptides**



# Laboratory of Mass Spectrometry and Gaseous Ion Chemistry

## PROWL

- ▶ **ProFound**
- ▶ **ProteinInfo**
- ▶ **PeptideMap**
- ▶ **PepFrag**
- ▶ **X! Tandem**
- ▶ **X! Hunter**
- ▶ **GPMDDB**
- ▶ **PROWL Home**
- ▶ **Chait Lab**



The Rockefeller University  
1230 York Avenue,  
New York, NY 10021  
(212) 327-8000

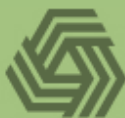

**National Center for  
Research Resources**

National Resource  
for the Mass Spectrometric  
Analysis of Biological  
Macromolecules

## ProFound



### Protein Candidates

| Rank | Expectation            | Protein Information and Sequence Analyse Tools (T)                                                  | %  | pI  | kDa   | R |
|------|------------------------|-----------------------------------------------------------------------------------------------------|----|-----|-------|---|
| 1    | 1.1 × 10 <sup>-7</sup> | gi 16758678 ref NP_446279.1  procollagen-lysine, 2-oxoglutarate 5-dioxygenase 1 [Rattus norvegicus] | 31 | 6.3 | 84.16 | ⊙ |
| +2   | 2.1 × 10 <sup>-6</sup> | gi 13489075 ref NP_071572.1  phosphodiesterase 10A [Rattus norvegicus]                              | 31 | 6.1 | 91.51 | ⊙ |
|      | -                      | gi 6683035 dbj BAA88997.1  PDE10A3 [Rattus norvegicus]                                              | 30 | 6.1 | 90.49 | ⊙ |
|      | -                      | gi 42600939 gb AAS21246.1  PDE10A14 [Rattus norvegicus]                                             | 31 | 6.7 | 75.40 | ⊙ |
|      | -                      | gi 42600937 gb AAS21245.1  PDE10A13 [Rattus norvegicus]                                             | 28 | 6.3 | 82.27 | ⊙ |
| 3    | 3.7 × 10 <sup>-6</sup> | gi 20301994 ref NP_620205.1  fibroblast activation protein [Rattus norvegicus]                      | 27 | 6.2 | 88.51 | ⊙ |
| 4    | 4.9 × 10 <sup>-6</sup> | gi 127570 sp P18588 MX1_RAT Interferon-induced GTP-binding protein Mx1                              | 27 | 6.5 | 75.08 | ⊙ |
| 5    | 9.2 × 10 <sup>-6</sup> | gi 55741823 ref NP_001006977.1  threonyl-tRNA synthetase [Rattus norvegicus]                        | 28 | 6.5 | 81.47 | ⊙ |
| 6    | 1.1 × 10 <sup>-5</sup> | gi 13489067 ref NP_068516.1  N-ethylmaleimide sensitive fusion protein [Rattus norvegicus]          | 27 | 6.6 | 83.21 | ⊙ |
|      | -                      | gi 55250714 gb AAH85721.1  G elongation factor [Rattus norvegicus]                                  | 32 | 6.4 | 84.12 | ⊙ |
|      | -                      | gi 92654 pir  A34337 propionyl-CoA carboxylase (EC 6.4.1.3) alpha chain precursor - rat (fragment)  | 36 | 6.3 | 78.22 | ⊙ |
|      | -                      | gi 9971583 dbj BAB12573.1  exchange factor for ARF6 [Rattus norvegicus]                             | 21 | 7.4 | 71.14 | ⊙ |
|      | -                      | gi 9507019 ref NP_062237.1  sec1 family domain containing 1 [Rattus norvegicus]                     | 26 | 6.1 | 72.59 | ⊙ |
|      | -                      | gi 1144569 gb AAB08009.1  r-sly1                                                                    | 26 | 6.0 | 73.90 | ⊙ |
|      | -                      | gi 1000686 dbj BAA06674.1  LIMK-2b [Rattus norvegicus]                                              | 29 | 7.0 | 71.01 | ⊙ |

|   |                                                                                                                                                                        |    |     |       |   |
|---|------------------------------------------------------------------------------------------------------------------------------------------------------------------------|----|-----|-------|---|
| - | gi 205063 gb AAA41476.1  ORF with similarities to Kex2 and furin proteins; putative                                                                                    | 22 | 6.0 | 84.77 | 🔴 |
| - | gi 57977273 ref NP_996729.1  phosphofructokinase, platelet [Rattus norvegicus]                                                                                         | 27 | 7.0 | 86.67 | 🔴 |
| - | gi 129684 sp P14882 PCCA_RAT Propionyl-CoA carboxylase alpha chain, mitochondrial precursor (PCCase subunit alpha) (Propanoyl-CoA:carbon dioxide ligase subunit alpha) | 34 | 6.3 | 78.32 | 🔴 |
| - | gi 51259466 gb AAH79391.1  Eukaryotic translation elongation factor 1 delta (guanine nucleotide exchange protein) [Rattus norvegicus]                                  | 23 | 6.1 | 72.68 | 🔴 |
| - | gi 47169484 tpe CAE48379.1  TPA: glutamine-fructose-6-phosphate transaminase 2 [Rattus norvegicus]                                                                     | 27 | 6.7 | 77.80 | 🔴 |
| - | gi 206050 gb AAA88512.1  alpha-propionyl-CoA carboxylase (EC 6.4.1.3)                                                                                                  | 33 | 6.7 | 80.56 | 🔴 |
| - | gi 48256734 gb AAT41589.1  acyl-CoA synthetase isoform 6 variant2 [Rattus norvegicus]                                                                                  | 26 | 6.8 | 79.18 | 🔴 |
| - | gi 20302036 ref NP_620228.1  nibrin [Rattus norvegicus]                                                                                                                | 22 | 6.4 | 84.31 | 🔴 |
| - | gi 16758432 ref NP_446077.1  G elongation factor [Rattus norvegicus]                                                                                                   | 25 | 7.0 | 84.55 | 🔴 |
| - | gi 51980333 gb AAH82049.1  DEAD (Asp-Glu-Ala-Asp) box polypeptide 1 [Rattus norvegicus]                                                                                | 24 | 6.8 | 83.45 | 🔴 |
| - | gi 17388906 gb AAF80473.2 AF162756_1 cenexin 2 [Rattus norvegicus]                                                                                                     | 19 | 6.7 | 89.88 | 🔴 |
| - | gi 50925505 gb AAH78857.1  Outer dense fiber of sperm tails 2 [Rattus norvegicus]                                                                                      | 23 | 7.3 | 74.08 | 🔴 |
| - | gi 56118953 ref NP_077049.2  LIM motif-containing protein kinase 2 [Rattus norvegicus]                                                                                 | 26 | 7.3 | 73.55 | 🔴 |
| - | gi 13929158 ref NP_114002.1  G protein-coupled receptor kinase interactor 1 [Rattus norvegicus]                                                                        | 23 | 6.5 | 85.95 | 🔴 |
| - | gi 1517938 gb AAB48561.1  isoform of PSD-95/SAP90 [Rattus norvegicus]                                                                                                  | 20 | 6.4 | 92.72 | 🔴 |
| - | gi 400195 sp Q02759 LX12L_RAT Arachidonate 12-lipoxygenase, leukocyte-type (12-LOX)                                                                                    | 24 | 6.1 | 76.40 | 🔴 |

|   |                                                                                                                                                                  |    |     |       |   |
|---|------------------------------------------------------------------------------------------------------------------------------------------------------------------|----|-----|-------|---|
| - | gi 37361828 gb AAQ91027.1  LRRGT00071 [Rattus norvegicus]                                                                                                        | 22 | 6.3 | 90.44 | 🔴 |
| - | gi 975277 gb AAA75166.1  p72                                                                                                                                     | 28 | 7.1 | 69.47 | 🔴 |
| - | gi 1209468 emb CAA63043.1  stat5bDelta40C [Rattus norvegicus]                                                                                                    | 21 | 6.4 | 83.65 | 🔴 |
| - | gi 2996000 gb AAC08408.1  outer dense fiber protein ODF84 [Rattus norvegicus]                                                                                    | 22 | 7.0 | 74.11 | 🔴 |
| - | gi 51858866 gb AAH81969.1  Similar to RIKEN cDNA 4921537D05 [Rattus norvegicus]                                                                                  | 17 | 6.2 | 82.12 | 🔴 |
| - | gi 55715908 gb AAH85700.1  Nibrin [Rattus norvegicus]                                                                                                            | 19 | 6.7 | 84.14 | 🔴 |
| - | gi 51859211 gb AAH82042.1  ATP-binding cassette, sub-family F (GCN20), member 3 [Rattus norvegicus]                                                              | 16 | 6.1 | 80.24 | 🔴 |
| - | gi 31542125 ref NP_112272.2  arachidonate 12-lipoxygenase [Rattus norvegicus]                                                                                    | 24 | 6.2 | 76.32 | 🔴 |
| - | gi 9507209 ref NP_062094.1  transformation related protein 63 [Rattus norvegicus]                                                                                | 21 | 6.2 | 77.66 | 🔴 |
| - | gi 48686585 gb AAT46048.1  fidgetin-like 1 [Rattus norvegicus]                                                                                                   | 26 | 6.6 | 74.92 | 🔴 |
| - | gi 18543341 ref NP_570095.1  acyl-CoA synthetase long-chain family member 6 [Rattus norvegicus]                                                                  | 22 | 6.6 | 79.17 | 🔴 |
| - | gi 417242 sp P33124 ACSL6_RAT Long-chain-fatty-acid--CoA ligase 6 (Long-chain acyl-CoA synthetase 6) (LACS 6) (Long-chain-fatty-acid--CoA ligase, brain isozyme) | 22 | 6.7 | 79.19 | 🔴 |
| - | gi 13751173 emb CAC37098.1  TA1 KET alpha protein [Rattus norvegicus]                                                                                            | 20 | 6.2 | 75.50 | 🔴 |
| - | gi 32264631 gb AAP78762.1  Ac1288 [Rattus norvegicus]                                                                                                            | 20 | 6.4 | 81.10 | 🔴 |
| - | gi 1845602 gb AAC53134.1  outer dense fiber protein [Rattus norvegicus]                                                                                          | 20 | 6.1 | 69.28 | 🔴 |
| - | gi 54035509 gb AAH83909.1  TNF receptor-associated protein 1 [Rattus norvegicus]                                                                                 | 26 | 6.6 | 80.67 | 🔴 |
| - | gi 21634411 gb AAM63551.1  hypertrophied skeletal muscle protein GTF3 [Rattus norvegicus]                                                                        | 19 | 6.7 | 93.26 | 🔴 |
| - | gi 51556265 ref NP_001003957.1  DNA methyltransferase 3A isoform 2 [Rattus norvegicus]                                                                           | 28 | 6.1 | 79.29 | 🔴 |

|   |                                                                                                                                              |    |     |       |  |
|---|----------------------------------------------------------------------------------------------------------------------------------------------|----|-----|-------|--|
| - | <a href="#">gi 39930373 ref NP_058867.1 </a> protein kinase C, epsilon [Rattus norvegicus]                                                   | 24 | 6.5 | 84.77 |  |
| - | <a href="#">gi 34859748 ref XP_227556.2 </a> PREDICTED: similar to CG10915-PA [Rattus norvegicus]                                            | 27 | 7.2 | 70.51 |  |
| - | <a href="#">gi 34858308 ref XP_232266.2 </a> PREDICTED: similar to Egg-derived tyrosine phosphatase CG6542-PA, isoform A [Rattus norvegicus] | 25 | 6.2 | 73.40 |  |
| - | <a href="#">gi 56270161 gb AAH87149.1 </a> Similar to retinoid x receptor interacting protein [Rattus norvegicus]                            | 17 | 6.3 | 81.62 |  |

## NOTE:

1. To search again using **unmatched masses**, click the symbol .
2. Highly similar protein sequences were given the same rank (click "+" to expand/contract).

**Input Summary****Search id** A7E9F8C7-124C-A8B852BE**Sequences** 20076**Date & Time** Wed Feb 07 15:49:01 2007 UTC (Search Time: 0.53 sec.)**Sample ID****Database** NCBI nr [..\databases\nr]**Taxonomy** Rattus**Mass Range** 69 - 94 kDa**pI Range** 6.0 -7.5**Digestion** Trypsin**Missed Cuts** 1**Modifications** +C2H3ON@C(Complete); +NO2-H@Y(Partial); +O@M(Partial);**Charge State** MH+**Masses (avg)****Tolerance (avg)** 1.00 ppm

**Masses (mon)** 711.333 712.212 717.442 720.308 723.325 739.362 740.240  
745.407 751.422 756.370 761.483 766.445 768.420 774.452  
777.355 781.429 783.423 789.438 795.345 798.477 804.264  
810.493 811.470 817.458 820.248 824.472 830.411 838.395  
840.480 854.263 855.541 858.494 862.263 878.454 888.449  
893.469 898.502 904.459 916.414 922.471 933.516 935.469  
941.631 943.490 947.523 954.597 960.634 961.385 967.464  
980.038 980.564 983.537 987.486 993.711 994.538 1000.466  
1012.824 1013.531 1017.497 1023.643 1024.569 1027.543  
1033.525 1040.588 1051.686 1058.504 1061.571 1064.510  
1067.696 1085.577 1088.660 1094.596 1100.592 1107.634  
1113.576 1114.542 1118.521 1124.695 1132.607 1138.547  
1146.667 1152.667 1154.541 1158.546 1164.669 1169.542  
1177.564 1186.609 1200.651 1204.641 1207.586 1214.635  
1216.910 1221.492 1228.581 1233.610 1240.758 1244.625  
1247.547 1254.759 1260.678 1263.666 1270.733 1284.612  
1291.689 1303.689 1304.661 1307.701 1315.720 1320.558  
1324.694 1331.708 1332.740 1339.604 1347.745 1349.598  
1356.629 1357.646 1364.771 1365.642 1372.714 1373.712  
1380.830 1391.605 1398.770 1401.691 1414.622 1415.711  
1421.795 1428.783 1429.877 1434.640 1442.733 1449.848  
1450.720 1457.855 1459.732 1463.720 1470.965 1471.740  
1479.730 1486.858 1489.585 1491.742 1498.821 1501.637  
1503.750 1514.785 1517.773 1521.762 1529.544 1530.703  
1535.710 1543.607 1546.809 1553.885 1558.718 1569.767  
1577.083 1577.805 1583.425 1590.155 1591.820 1596.658  
1601.745 1608.920 1611.864 1614.866 1622.910 1626.709  
1630.865 1638.731 1639.794 1648.174 1648.830 1654.794  
1662.855 1665.986 1674.736 1676.940 1680.830 1688.788  
1697.014 1709.935 1713.751 1726.092 1727.826 1732.643  
1741.004 1745.895 1754.034 1757.956 1767.029 1773.260  
1783.823 1789.856 1798.155 1800.782 1808.648 1811.742  
1822.246 1824.862 1832.838 1834.856 1846.960 1847.887  
1851.941 1860.702 1867.825 1874.844 1883.834 1893.989  
1901.998 1906.523 1910.906 1915.943 1925.031 1929.879  
1933.075 1941.967 1954.093 1959.872 1973.130 1977.979  
1982.054 1992.861 1993.944 2004.000 2012.087 2021.916  
2032.103 2041.038 2048.042 2057.500 2060.953 2066.031  
2076.115 2094.289 2099.995 2111.955 2120.971 2126.993

|          |          |          |          |          |          |
|----------|----------|----------|----------|----------|----------|
| 2142.552 | 2146.169 | 2149.665 | 2153.414 | 2163.051 | 2172.490 |
| 2183.931 | 2189.664 | 2194.046 | 2203.110 | 2220.183 | 2229.141 |
| 2238.214 | 2247.272 | 2258.269 | 2261.183 | 2270.994 | 2275.137 |
| 2278.962 | 2282.146 | 2291.293 | 2296.165 | 2307.961 | 2311.327 |
| 2315.150 | 2324.169 | 2327.093 | 2337.209 | 2343.107 | 2353.356 |
| 2356.135 | 2367.232 | 2379.210 | 2387.168 | 2395.238 | 2408.245 |
| 2419.232 | 2421.486 | 2431.075 | 2439.353 | 2449.244 | 2452.212 |
| 2455.282 | 2470.192 | 2480.784 | 2482.058 | 2491.565 | 2501.596 |
| 2504.292 | 2511.141 | 2520.433 | 2522.294 | 2525.069 | 2534.421 |
| 2538.186 | 2546.984 | 2549.093 | 2562.273 | 2575.419 | 2581.782 |
| 2584.487 | 2595.149 | 2597.381 | 2609.308 | 2620.436 | 2632.935 |
| 2646.503 | 2656.668 | 2658.474 | 2667.200 | 2677.753 | 2685.429 |
| 2697.382 | 2707.539 | 2718.347 | 2724.463 | 2729.529 | 2739.676 |
| 2740.945 | 2743.945 | 2747.439 | 2758.256 | 2766.330 | 2777.645 |
| 2783.294 | 2796.496 | 2800.310 | 2810.445 | 2814.590 | 2826.397 |
| 2830.733 | 2835.646 | 2839.343 | 2850.375 | 2863.303 | 2867.523 |
| 2881.357 | 2886.206 | 2891.637 | 2894.646 | 2905.676 | 2916.872 |
| 2920.439 | 2933.452 | 2944.921 | 2950.957 | 2957.585 | 2969.285 |
| 2978.177 | 2990.764 | 2996.958 | 3009.437 | 3019.721 | 3024.017 |
| 3032.619 | 3046.324 | 3050.491 | 3060.509 | 3063.267 | 3076.856 |
| 3090.099 | 3095.644 | 3106.600 | 3109.830 | 3115.994 | 3126.684 |
| 3140.638 | 3147.135 | 3158.408 | 3161.627 | 3171.559 | 3177.747 |
| 3187.781 | 3200.192 | 3205.683 | 3214.844 | 3225.892 | 3231.979 |
| 3234.660 | 3239.528 | 3248.698 | 3263.882 | 3274.822 | 3279.488 |
| 3288.985 | 3292.887 | 3305.501 | 3319.652 | 3325.982 | 3335.662 |
| 3347.655 | 3359.045 | 3361.622 | 3367.365 | 3373.505 | 3387.800 |
| 3391.957 | 3395.881 | 3409.200 | 3422.742 | 3426.290 | 3433.074 |
| 3455.605 | 3470.349 | 3476.779 | 3484.964 | 3505.709 | 3522.956 |
| 3527.874 | 3549.988 | 3562.317 | 3569.314 | 3582.320 | 3587.562 |
| 3607.068 | 3614.189 | 3619.859 | 3636.284 | 3647.987 | 3668.960 |
| 3685.127 | 3695.966 |          |          |          |          |

**Tolerance** 35.00 ppm  
**(mon)**

**Number of** 424  
**Peptides**

# Laboratory of Mass Spectrometry and Gaseous Ion Chemistry

## PROWL

- ▶ **ProFound**
- ▶ **ProteinInfo**
- ▶ **PeptideMap**
- ▶ **PepFrag**
- ▶ **X! Tandem**
- ▶ **X! Hunter**
- ▶ **GPMDDB**
- ▶ **PROWL Home**
- ▶ **Chait Lab**

## ProFound



### Protein Candidates

| Rank | Expectation          | Protein Information and Sequence Analyse Tools (T)                                                                                 | %  | pI  | kDa   | R |
|------|----------------------|------------------------------------------------------------------------------------------------------------------------------------|----|-----|-------|---|
| 1    | 9.8×10 <sup>-7</sup> | gi 18158453 ref NP_542961.1  galactose-4-epimerase, UDP [Rattus norvegicus]                                                        | 62 | 7.9 | 38.55 | ⊙ |
| 2    | 4.1×10 <sup>-5</sup> | gi 16758520 ref NP_446155.1  mitogen-activated protein kinase kinase 6 [Rattus norvegicus]                                         | 63 | 7.0 | 37.77 | ⊙ |
| 3    | 7.7×10 <sup>-4</sup> | gi 45478138 gb AAS66240.1  LRRGT00149 [Rattus norvegicus]                                                                          | 43 | 6.6 | 43.49 | ⊙ |
| 4    | 1.6×10 <sup>-3</sup> | gi 34869622 ref XP_214147.2  PREDICTED: similar to proteasome 26S ATPase subunit 6 [Rattus norvegicus]                             | 41 | 7.8 | 46.06 | ⊙ |
| 5    | 6.3×10 <sup>-3</sup> | gi 50925797 gb AAH79230.1  Similar to actin-like 7-alpha-like protein [Rattus norvegicus]                                          | 47 | 6.9 | 46.60 | ⊙ |
| +6   | 0.018                | gi 51980625 gb AAH81691.1  Sulfotransferase family, cytosolic, 1C, member 2a [Rattus norvegicus]                                   | 48 | 7.0 | 35.18 | ⊙ |
|      | -                    | gi 11262122 pir  JC7283 hydroxyarylamine sulfotransferase (EC 2.8.2.-) 2A - rat                                                    | 38 | 7.0 | 35.22 | ⊙ |
|      | -                    | gi 4689042 emb CAB41461.1  sulfotransferase K2 [Rattus norvegicus]                                                                 | 38 | 7.0 | 35.22 | ⊙ |
| 7    | 0.026                | gi 54035400 gb AAH83568.1  Phosphoglycerate kinase 2 [Rattus norvegicus]                                                           | 37 | 7.7 | 45.39 | ⊙ |
| 8    | 0.032                | gi 13592141 ref NP_112411.1  for proteasomal ATPase (SUG1) [Rattus norvegicus]                                                     | 53 | 7.1 | 45.78 | ⊙ |
| 9    | 0.048                | gi 11968124 ref NP_071979.1  transcobalamin 2 precursor [Rattus norvegicus]                                                        | 42 | 7.9 | 47.86 | ⊙ |
| 10   | 0.072                | gi 34866729 ref XP_217099.2  PREDICTED: similar to Vacuolar protein sorting 26 homolog (VPS26 protein homolog) [Rattus norvegicus] | 53 | 6.9 | 39.16 | ⊙ |

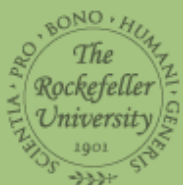

The Rockefeller University  
1230 York Avenue,  
New York, NY 10021  
(212) 327-8000



**National Center for  
Research Resources**

National Resource  
for the Mass Spectrometric  
Analysis of Biological  
Macromolecules

|   |                                                                                                              |    |     |       |  |
|---|--------------------------------------------------------------------------------------------------------------|----|-----|-------|--|
| - | <a href="#">gi 25453414 ref NP_037289.1</a>   arginosuccinate synthetase [Rattus norvegicus]                 | 45 | 7.7 | 46.76 |  |
| - | <a href="#">gi 1334163 emb CAA30044.1</a>   unnamed protein product [Rattus norvegicus]                      | 55 | 6.8 | 39.60 |  |
| - | <a href="#">gi 809075 emb CAA25516.1</a>   cytochrome P-450 [Rattus norvegicus]                              | 37 | 6.8 | 42.56 |  |
| - | <a href="#">gi 4455013 gb AAD21037.1</a>   G-septin gamma [Rattus norvegicus]                                | 39 | 7.8 | 34.56 |  |
| - | <a href="#">gi 9506591 ref NP_062111.1</a>   farnesyl diphosphate farnesyl transferase 1 [Rattus norvegicus] | 37 | 6.6 | 48.72 |  |
| - | <a href="#">gi 38197390 gb AAH61877.1</a>   Glutamate oxaloacetate transaminase 1 [Rattus norvegicus]        | 33 | 6.7 | 46.64 |  |

## NOTE:

1. To search again using **unmatched masses**, click the symbol .
2. Highly similar protein sequences were given the same rank (click "+" to expand/contract).

**Input Summary****Search id** B07F1CB6-09B8-60A126B5**Sequences** 20076**Date & Time** Tue Feb 06 19:40:01 2007 UTC (Search Time: 0.58 sec.)**Sample ID****Database** NCBI nr [..\databases\nr]**Taxonomy** Rattus**Mass Range** 30 - 50 kDa**pI Range** 6.6 -8.3**Digestion** Trypsin**Missed Cuts** 1**Modifications** +C2H3ON@C(Complete); +O@M(Partial); +HPO3@STY(Partial);**Charge State** MH+**Masses (avg)****Tolerance (avg)** 1.00 ppm



**Masses (mon)** 710.413 711.453 718.392 719.510 724.912 725.510 733.409  
738.407 740.399 743.440 749.465 752.505 757.439 763.428  
766.459 768.527 774.672 775.440 781.914 782.515 786.452  
792.479 793.426 796.498 798.473 804.470 806.493 812.482  
813.440 815.417 819.474 820.456 824.507 827.503 833.472  
834.463 836.834 840.477 848.646 850.548 857.486 889.429  
902.495 903.466 916.492 920.528 932.465 934.520 937.546  
943.528 945.575 948.556 958.568 959.464 965.600 980.562  
988.541 990.573 1002.551 1012.823 1013.508 1016.573  
1022.502 1023.578 1029.506 1031.601 1040.610 1052.035  
1052.668 1058.505 1060.541 1066.773 1067.696 1085.645  
1088.684 1091.550 1098.630 1102.559 1107.637 1113.669  
1117.534 1120.573 1132.678 1133.584 1137.598 1146.671  
1148.541 1151.735 1158.001 1158.619 1162.631 1169.571  
1177.662 1186.848 1187.729 1190.653 1200.961 1203.645  
1210.870 1211.666 1218.704 1221.665 1228.685 1231.635  
1238.707 1239.702 1244.683 1248.651 1251.744 1259.710  
1263.750 1271.225 1271.729 1284.746 1287.666 1291.678  
1303.752 1305.502 1312.735 1314.784 1321.699 1324.686  
1332.463 1334.552 1339.769 1346.701 1353.749 1357.739  
1364.717 1371.663 1373.708 1381.602 1391.853 1394.718  
1402.722 1403.605 1410.826 1411.813 1419.080 1419.740  
1425.630 1428.783 1432.729 1440.459 1441.763 1448.954  
1449.902 1455.751 1460.712 1467.847 1468.802 1482.869  
1486.734 1491.722 1498.802 1500.731 1504.723 1514.741  
1517.703 1525.712 1532.740 1534.744 1536.749 1543.591  
1544.649 1547.747 1555.781 1562.853 1568.713 1575.813  
1582.742 1590.814 1596.834 1606.750 1614.910 1617.427  
1625.804 1627.840 1636.925 1639.896 1647.811 1653.802  
1661.806 1666.832 1676.963 1679.804 1683.780 1689.780  
1697.815 1698.814 1705.842 1713.805 1725.027 1725.755  
1731.829 1740.105 1746.515 1754.881 1755.897 1763.749  
1764.937 1771.959 1782.746 1786.130 1789.860 1796.875  
1800.815 1809.025 1811.833 1820.815 1822.740 1826.940  
1835.065 1847.055 1849.950 1858.910 1862.076 1870.919  
1873.891 1882.646 1884.955 1890.982 1898.750 1908.063  
1912.949 1922.946 1931.016 1939.014 1943.910 1954.285  
1964.062 1972.995 1975.927 1981.979 1993.989 2002.780  
2005.945 2014.248 2016.153 2024.235 2026.932 2041.937

|          |          |          |          |          |          |
|----------|----------|----------|----------|----------|----------|
| 2051.199 | 2054.006 | 2065.070 | 2068.346 | 2078.097 | 2082.059 |
| 2100.970 | 2112.283 | 2117.022 | 2121.828 | 2132.326 | 2142.227 |
| 2147.031 | 2149.965 | 2159.500 | 2165.137 | 2170.029 | 2181.967 |
| 2184.989 | 2193.056 | 2196.053 | 2205.247 | 2208.063 | 2220.233 |
| 2224.233 | 2229.032 | 2234.059 | 2238.168 | 2258.287 | 2260.208 |
| 2265.046 | 2275.830 | 2279.108 | 2282.164 | 2291.634 | 2296.053 |
| 2308.981 | 2310.114 | 2315.167 | 2325.192 | 2337.095 | 2351.020 |
| 2355.169 | 2364.199 | 2367.181 | 2377.252 | 2383.957 | 2387.082 |
| 2395.119 | 2399.109 | 2410.010 | 2413.185 | 2420.304 | 2424.183 |
| 2436.137 | 2447.021 | 2454.157 | 2463.208 | 2468.292 | 2479.281 |
| 2490.093 | 2495.374 | 2499.211 | 2509.324 | 2519.322 | 2521.960 |
| 2525.817 | 2535.136 | 2537.239 | 2554.165 | 2567.152 | 2577.128 |
| 2579.420 | 2584.007 | 2596.074 | 2602.943 | 2613.333 | 2617.088 |
| 2625.158 | 2633.171 | 2647.397 | 2651.316 | 2663.157 | 2673.492 |
| 2676.314 | 2680.253 | 2690.272 | 2695.236 | 2706.263 | 2719.351 |
| 2723.252 | 2733.350 | 2740.645 | 2745.479 | 2755.301 | 2758.307 |
| 2774.428 | 2785.973 | 2799.750 | 2811.455 | 2817.816 | 2820.784 |
| 2832.210 | 2835.222 | 2845.454 | 2849.193 | 2861.071 | 2869.509 |
| 2883.564 | 2894.391 | 2905.419 | 2915.376 | 2943.708 | 2954.207 |
| 2982.983 | 2993.257 | 3003.770 | 3007.944 | 3024.593 | 3029.373 |
| 3036.014 | 3046.602 | 3050.470 | 3058.587 | 3070.035 | 3073.171 |
| 3080.495 | 3093.445 | 3104.883 | 3108.262 | 3111.493 | 3123.491 |
| 3126.428 | 3132.307 | 3143.363 | 3146.310 | 3154.363 | 3165.686 |
| 3168.529 | 3172.474 | 3178.433 | 3187.288 | 3198.859 | 3201.565 |
| 3212.361 | 3217.517 | 3228.837 | 3240.445 | 3243.322 | 3252.535 |
| 3265.417 | 3278.556 | 3282.298 | 3285.927 | 3297.289 | 3309.406 |
| 3313.360 | 3326.905 | 3334.525 | 3347.606 | 3353.649 | 3364.815 |
| 3370.795 | 3382.577 | 3387.396 | 3399.599 | 3411.981 | 3419.736 |
| 3425.804 | 3429.274 | 3442.105 | 3447.006 | 3462.406 | 3501.034 |
| 3507.811 | 3524.104 | 3548.334 | 3554.434 | 3562.469 | 3571.881 |
| 3586.304 | 3591.267 | 3598.131 | 3618.275 | 3623.705 | 3638.354 |
| 3656.167 | 3662.073 | 3665.375 | 3670.227 | 3684.969 | 3692.576 |

**Tolerance** 34.00 ppm  
**(mon)**

**Number of** 434  
**Peptides**

# Laboratory of Mass Spectrometry and Gaseous Ion Chemistry

## PROWL

- ▶ **ProFound**
- ▶ **ProteinInfo**
- ▶ **PeptideMap**
- ▶ **PepFrag**
- ▶ **X! Tandem**
- ▶ **X! Hunter**
- ▶ **GPMDDB**
- ▶ **PROWL Home**
- ▶ **Chait Lab**

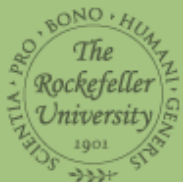

The Rockefeller University  
1230 York Avenue,  
New York, NY 10021  
(212) 327-8000



**National Center for  
Research Resources**

National Resource  
for the Mass Spectrometric  
Analysis of Biological  
Macromolecules

## ProFound



### Protein Candidates

| Rank | Expectation          | Protein Information and Sequence Analyse Tools (T)                                                                | %  | pI  | kDa   | R |
|------|----------------------|-------------------------------------------------------------------------------------------------------------------|----|-----|-------|---|
| +1   | 4.1×10 <sup>-4</sup> | gi 49359177 gb AAT65503.1  protein kinase C epsilon [Rattus norvegicus]                                           | 41 | 6.6 | 84.93 | ⊙ |
|      | -                    | gi 39930373 ref NP_058867.1  protein kinase C, epsilon [Rattus norvegicus]                                        | 40 | 6.5 | 84.77 | ⊙ |
| +2   | 5.5×10 <sup>-4</sup> | gi 28557685 ref NP_787065.1  procollagen lysine, 2-oxoglutarate 5-dioxygenase 2 [Rattus norvegicus]               | 43 | 6.3 | 87.56 | ⊙ |
|      | -                    | gi 28400783 emb CAD23630.1  procollagen-lysine, 2-oxoglutarate 5-dioxygenase 2, short variant [Rattus norvegicus] | 42 | 6.3 | 85.15 | ⊙ |
| 3    | 7.7×10 <sup>-4</sup> | gi 48686585 gb AAT46048.1  fidgetin-like 1 [Rattus norvegicus]                                                    | 57 | 6.6 | 74.92 | ⊙ |
|      | -                    | gi 12083643 ref NP_073182.1  exocyst complex component 7 [Rattus norvegicus]                                      | 36 | 6.3 | 75.26 | ⊙ |
|      | -                    | gi 40786501 ref NP_955434.1  sperm protein SSP411 [Rattus norvegicus]                                             | 38 | 6.6 | 89.03 | ⊙ |
|      | -                    | gi 34854035 ref XP_342626.1  PREDICTED: similar to Semaphorin-3D precursor [Rattus norvegicus]                    | 39 | 6.8 | 90.66 | ⊙ |

### NOTE:

1. To search again using **unmatched masses**, click the symbol ⊙.
2. Highly similar protein sequences were given the same rank (click "+" to expand/contract).

### Input Summary

**Search id** B535AE6D-0510-65492B6E

**Sequences** 20092

**Date & Time** Fri Jan 26 18:46:26 2007 UTC (Search Time: 0.53 sec.)

**Sample ID**

**Database** NCBIInr [..\databases\Inr]

**Taxonomy** Rattus

**Mass Range** 73 - 94 kDa

**pI Range** 6.2 -7.4

**Digestion** Trypsin

**Missed Cuts** 1

**Modifications** +C2H3ON@C(Complete); +O@M(Partial); +HPO3@STY(Partial);

**Charge State** MH+

**Masses (avg)**

**Tolerance (avg)** 1.00 ppm

**Masses (mon)** 710.332 711.336 718.419 723.564 724.378 727.422 732.454  
733.419 738.453 739.385 742.405 745.431 750.470 751.391  
754.398 763.457 766.377 768.407 774.440 778.449 784.408  
790.428 791.449 794.384 797.362 803.432 805.453 813.374  
816.446 819.465 825.463 831.522 832.472 838.810 839.414  
841.461 848.440 854.504 859.466 865.688 866.499 879.456  
882.550 887.472 893.393 895.444 903.412 906.467 917.476  
923.476 933.457 939.488 944.464 948.478 955.493 962.492  
964.497 970.523 979.534 982.441 989.560 990.533 993.500  
997.575 1003.512 1018.463 1023.580 1036.534 1042.543  
1051.861 1052.515 1058.570 1060.563 1065.520 1071.920  
1072.537 1079.644 1081.590 1088.549 1090.526 1096.577  
1101.485 1106.537 1107.544 1113.508 1124.740 1125.575  
1132.607 1133.558 1138.525 1140.546 1147.578 1148.536  
1154.564 1164.600 1173.089 1173.619 1175.603 1187.630  
1191.599 1207.587 1215.645 1218.579 1221.588 1228.796  
1229.692 1232.620 1234.653 1242.065 1243.607 1251.047  
1251.570 1259.654 1262.594 1269.658 1271.649 1284.641  
1285.630 1289.663 1296.658 1302.577 1305.688 1307.659  
1314.751 1316.533 1327.643 1329.630 1336.658 1337.642  
1347.704 1348.693 1351.586 1372.701 1373.673 1377.717  
1391.743 1400.621 1407.708 1411.702 1418.640 1419.704  
1426.764 1428.747 1432.719 1434.758 1441.727 1443.721  
1451.661 1462.710 1464.718 1469.772 1472.715 1482.729  
1483.740 1487.736 1500.616 1501.712 1514.783 1517.692  
1521.655 1529.753 1530.649 1535.710 1542.946 1543.793  
1555.904 1556.727 1563.721 1566.810 1569.716 1576.765

|          |          |          |          |          |          |
|----------|----------|----------|----------|----------|----------|
| 1584.715 | 1592.684 | 1599.785 | 1605.741 | 1613.871 | 1621.833 |
| 1623.731 | 1626.825 | 1635.036 | 1635.798 | 1646.762 | 1650.808 |
| 1659.765 | 1660.807 | 1669.269 | 1669.819 | 1672.846 | 1677.862 |
| 1686.781 | 1688.745 | 1696.833 | 1716.135 | 1724.792 | 1726.806 |
| 1731.846 | 1735.743 | 1743.831 | 1746.840 | 1753.742 | 1761.815 |
| 1783.017 | 1783.870 | 1787.797 | 1791.757 | 1800.060 | 1802.746 |
| 1810.874 | 1812.708 | 1820.801 | 1821.721 | 1830.238 | 1830.813 |
| 1835.888 | 1847.851 | 1856.516 | 1859.941 | 1868.866 | 1877.901 |
| 1879.857 | 1889.825 | 1895.889 | 1907.812 | 1913.845 | 1923.933 |
| 1930.940 | 1939.115 | 1940.894 | 1945.911 | 1960.851 | 1972.079 |
| 1976.956 | 1988.951 | 2001.855 | 2003.844 | 2009.847 | 2013.985 |
| 2022.971 | 2031.794 | 2035.833 | 2046.055 | 2054.837 | 2060.978 |
| 2072.060 | 2077.059 | 2082.955 | 2096.100 | 2098.938 | 2104.896 |
| 2110.987 | 2122.792 | 2127.014 | 2136.964 | 2141.013 | 2150.029 |
| 2160.001 | 2170.028 | 2181.998 | 2185.963 | 2191.950 | 2195.041 |
| 2204.959 | 2207.996 | 2221.149 | 2230.172 | 2233.035 | 2236.123 |
| 2244.922 | 2257.064 | 2265.999 | 2268.180 | 2277.009 | 2280.063 |
| 2283.087 | 2292.171 | 2294.978 | 2311.008 | 2315.122 | 2324.075 |
| 2326.088 | 2352.115 | 2361.138 | 2367.098 | 2379.173 | 2383.873 |
| 2393.023 | 2395.133 | 2398.991 | 2408.302 | 2410.915 | 2414.123 |
| 2423.133 | 2425.023 | 2434.286 | 2441.136 | 2451.164 | 2454.065 |
| 2465.189 | 2469.170 | 2480.060 | 2485.060 | 2495.278 | 2502.012 |
| 2509.025 | 2519.021 | 2521.152 | 2531.240 | 2541.451 | 2565.208 |
| 2577.504 | 2581.062 | 2585.239 | 2597.377 | 2611.127 | 2629.160 |
| 2640.224 | 2650.306 | 2659.469 | 2664.126 | 2676.240 | 2680.249 |
| 2691.105 | 2695.161 | 2705.067 | 2717.308 | 2720.364 | 2725.250 |
| 2735.740 | 2739.546 | 2743.215 | 2755.295 | 2760.212 | 2771.124 |
| 2774.281 | 2782.342 | 2792.265 | 2799.104 | 2806.165 | 2816.453 |
| 2822.355 | 2826.329 | 2838.125 | 2843.080 | 2855.414 | 2861.250 |
| 2867.451 | 2881.032 | 2891.275 | 2894.246 | 2904.368 | 2916.289 |
| 2927.324 | 2936.042 | 2949.346 | 2959.417 | 2963.194 | 2966.422 |
| 2980.420 | 2991.060 | 3002.863 | 3009.513 | 3017.354 | 3021.279 |
| 3034.998 | 3039.379 | 3052.470 | 3062.753 | 3068.387 | 3080.455 |
| 3086.217 | 3094.233 | 3101.546 | 3115.786 | 3127.306 | 3131.227 |
| 3139.302 | 3153.514 | 3161.315 | 3167.570 | 3178.464 | 3191.624 |
| 3199.319 | 3209.161 | 3223.493 | 3235.366 | 3238.050 | 3248.566 |
| 3256.523 | 3265.529 | 3277.016 | 3288.678 | 3292.738 | 3304.350 |
| 3308.420 | 3312.182 | 3323.207 | 3325.616 | 3338.650 | 3350.110 |
| 3353.701 | 3365.343 | 3369.059 | 3384.570 | 3397.563 | 3410.463 |

|          |          |          |          |          |          |
|----------|----------|----------|----------|----------|----------|
| 3414.558 | 3427.570 | 3439.578 | 3451.251 | 3460.365 | 3464.213 |
| 3479.745 | 3484.718 | 3497.146 | 3505.045 | 3519.428 | 3530.516 |
| 3534.283 | 3542.906 | 3557.368 | 3563.242 | 3575.569 | 3582.305 |
| 3599.194 | 3615.516 | 3621.437 | 3637.931 | 3643.140 | 3655.034 |
| 3666.541 | 3683.220 | 3697.272 | 3701.579 |          |          |

**Tolerance** 37.00 ppm  
**(mon)**

**Number of** 433  
**Peptides**

# Laboratory of Mass Spectrometry and Gaseous Ion Chemistry

## PROWL

- ▶ **ProFound**
- ▶ **ProteinInfo**
- ▶ **PeptideMap**
- ▶ **PepFrag**
- ▶ **X! Tandem**
- ▶ **X! Hunter**
- ▶ **GPMDDB**
- ▶ **PROWL Home**
- ▶ **Chait Lab**



The Rockefeller University  
1230 York Avenue,  
New York, NY 10021  
(212) 327-8000



**National Center for  
Research Resources**

National Resource  
for the Mass Spectrometric  
Analysis of Biological  
Macromolecules

## ProFound



### Protein Candidates

| Rank | Expectation             | Protein Information and Sequence Analyse Tools (T)                                                                                               | %  | pI  | kDa   | R |
|------|-------------------------|--------------------------------------------------------------------------------------------------------------------------------------------------|----|-----|-------|---|
| +1   | 1.1 × 10 <sup>-30</sup> | gi 461731 sp P26772 CH10_RAT 10 kDa heat shock protein, mitochondrial (Hsp10) (10 kDa chaperonin) (CPN10)                                        | 59 | 8.9 | 10.88 | ⊙ |
|      | -                       | gi 6981052 ref NP_037098.1  heat shock 10 kDa protein 1 [Rattus norvegicus]                                                                      | 59 | 8.9 | 10.86 | ⊙ |
|      | -                       | gi 400542 gb AAB27570.1  chaperonin 10, cpn10 [Rattus norvegicus=rats, liver, Peptide Mitochondrial, 101 aa]                                     | 59 | 8.9 | 10.75 | ⊙ |
| 2    | 3.0 × 10 <sup>-13</sup> | gi 8825633 gb AAF80151.1  T cell receptor [Rattus norvegicus]                                                                                    | 48 | 9.0 | 11.43 | ⊙ |
| 3    | 2.4 × 10 <sup>-10</sup> | gi 46015734 pdb 1S6C B Chain B, Crystal Structure Of The Complex Between Kchip1 And Kv4.2 N1-30                                                  | 97 | 9.5 | 2.95  | ⊙ |
| 4    | 1.4 × 10 <sup>-8</sup>  | gi 50925829 gb AAH79266.1  LOC290508 protein [Rattus norvegicus]                                                                                 | 63 | 9.7 | 7.17  | ⊙ |
| 5    | 4.6 × 10 <sup>-8</sup>  | gi 1297196 gb AAC52814.1  RCAT2                                                                                                                  | 51 | 9.1 | 4.41  | ⊙ |
| 6    | 7.9 × 10 <sup>-8</sup>  | gi 41529155 dbj BAD08448.1  CD89 or IgA Fc receptor isoform 2 [Rattus norvegicus]                                                                | 35 | 9.3 | 12.27 | ⊙ |
| 7    | 5.2 × 10 <sup>-7</sup>  | gi 12055452 emb CAC20893.1  immunoglobulin heavy chain variable region [Rattus norvegicus]                                                       | 44 | 9.3 | 9.25  | ⊙ |
| 8    | 9.6 × 10 <sup>-7</sup>  | gi 114491 sp P11608 ATP8_RAT ATP synthase protein 8 (ATPase subunit 8) (A6L) (Chargerin II)                                                      | 37 | 9.3 | 7.62  | ⊙ |
| 9    | 1.0 × 10 <sup>-6</sup>  | gi 6900670 emb CAB71432.1  immunoglobulin heavy chain variable region [Rattus norvegicus]                                                        | 38 | 9.8 | 11.24 | ⊙ |
| 10   | 1.6 × 10 <sup>-6</sup>  | gi 6900734 emb CAB71464.1  immunoglobulin heavy chain variable region [Rattus norvegicus]                                                        | 36 | 9.6 | 10.63 | ⊙ |
| 11   | 1.8 × 10 <sup>-6</sup>  | gi 7677280 gb AAF67106.1 AF220557_1 murine complement receptor 1-specific monoclonal antibody Ig light chain variable region [Rattus norvegicus] | 25 | 9.5 | 12.66 | ⊙ |

|    |                      |                                                                                                             |    |     |       |  |
|----|----------------------|-------------------------------------------------------------------------------------------------------------|----|-----|-------|--|
| 12 | $2.7 \times 10^{-6}$ | <a href="#">gi 6900772 emb CAB71483.1</a>   immunoglobulin heavy chain variable region [Rattus norvegicus]  | 40 | 8.7 | 11.89 |  |
| 13 | $2.7 \times 10^{-6}$ | <a href="#">gi 12055436 emb CAC20885.1</a>   immunoglobulin heavy chain variable region [Rattus norvegicus] | 52 | 9.4 | 9.27  |  |
| 14 | $3.8 \times 10^{-6}$ | <a href="#">gi 6900790 emb CAB71492.1</a>   immunoglobulin heavy chain variable region [Rattus norvegicus]  | 41 | 9.0 | 10.71 |  |
| 15 | $4.8 \times 10^{-6}$ | <a href="#">gi 984323 gb AAB17124.1</a>   signal recognition particle 54 kDa subunit                        | 20 | 9.5 | 7.98  |  |
| 16 | $5.2 \times 10^{-6}$ | <a href="#">gi 6900593 emb CAB71392.1</a>   immunoglobulin heavy chain variable region [Rattus norvegicus]  | 42 | 9.0 | 11.47 |  |
| 17 | $5.2 \times 10^{-6}$ | <a href="#">gi 6900510 emb CAB71838.1</a>   immunoglobulin heavy chain variable region [Rattus norvegicus]  | 42 | 9.3 | 11.65 |  |
| 18 | $5.7 \times 10^{-6}$ | <a href="#">gi 19424244 ref NP_598245.1</a>   brain protein 44-like [Rattus norvegicus]                     | 31 | 9.9 | 12.61 |  |
| 19 | $5.7 \times 10^{-6}$ | <a href="#">gi 37361848 gb AAQ91037.1</a>   LRRGT00081 [Rattus norvegicus]                                  | 36 | 9.6 | 5.69  |  |
| 20 | $8.1 \times 10^{-6}$ | <a href="#">gi 1166518 gb AAC52371.1</a>   RGS3                                                             | 31 | 9.6 | 7.79  |  |
| 21 | $5.2 \times 10^{-5}$ | <a href="#">gi 56799093 dbj BAD83366.1</a>   myelin protein zero [Rattus norvegicus]                        | 14 | 8.6 | 11.78 |  |
| 22 | $6.6 \times 10^{-5}$ | <a href="#">gi 6900876 emb CAB71535.1</a>   immunoglobulin heavy chain variable region [Rattus norvegicus]  | 20 | 9.3 | 11.80 |  |
| 23 | $1.1 \times 10^{-4}$ | <a href="#">gi 2253444 gb AAB62948.1</a>   mucin 1 [Rattus norvegicus]                                      | 28 | 9.1 | 8.28  |  |
| 24 | $1.4 \times 10^{-4}$ | <a href="#">gi 554443 gb AAA41347.1</a>   heme oxygenase                                                    | 24 | 9.3 | 10.61 |  |
| 25 | $1.8 \times 10^{-4}$ | <a href="#">gi 20384773 gb AAK55112.1</a>   NOVA-1 variant 4 [Rattus norvegicus]                            | 49 | 9.3 | 9.46  |  |
| 26 | $6.4 \times 10^{-4}$ | <a href="#">gi 818016 emb CAA25083.1</a>   unnamed protein product [Rattus norvegicus]                      | 22 | 9.3 | 10.55 |  |
| 27 | $6.9 \times 10^{-3}$ | <a href="#">gi 2570078 emb CAA05477.1</a>   Immunoglobulin heavy chain [Rattus norvegicus]                  | 34 | 9.5 | 9.26  |  |

## NOTE:

1. To search again using **unmatched masses**, click the symbol .
2. Highly similar protein sequences were given the same rank (click "+" to expand/contract).



**Input Summary****Search id** B12053D2-0918-61412755**Sequences** 20076**Date & Time** Mon Feb 05 21:35:17 2007 UTC (Search Time: 0.28 sec.)**Sample ID****Database** NCBI nr [..\databases\nr]**Taxonomy** Rattus**Mass Range** 1 - 13 kDa**pI Range** 8.5 -10.0**Digestion** Trypsin**Missed Cuts** 1**Modifications** +C2H3ON@C(Complete);**Charge State** MH+**Masses (avg)****Tolerance (avg)** 1.00 ppm

|                     |          |          |          |          |          |          |         |
|---------------------|----------|----------|----------|----------|----------|----------|---------|
| <b>Masses (mon)</b> | 710.424  | 712.236  | 717.413  | 723.368  | 726.283  | 731.475  | 739.425 |
|                     | 740.230  | 746.408  | 752.446  | 754.384  | 763.461  | 765.358  | 768.393 |
|                     | 774.426  | 775.399  | 778.473  | 784.357  | 788.431  | 793.386  | 799.478 |
|                     | 802.409  | 804.258  | 811.445  | 817.395  | 818.414  | 820.262  | 824.486 |
|                     | 830.445  | 838.274  | 839.462  | 841.470  | 854.514  | 860.422  | 866.510 |
|                     | 880.484  | 888.486  | 889.489  | 902.475  | 904.436  | 907.493  | 913.623 |
|                     | 914.477  | 919.468  | 921.508  | 933.493  | 935.508  | 941.463  | 946.486 |
|                     | 959.464  | 960.486  | 964.514  | 970.582  | 976.501  | 986.322  | 992.522 |
|                     | 995.598  | 997.594  | 1003.531 | 1013.573 | 1019.557 | 1023.578 |         |
|                     | 1030.542 | 1032.574 | 1035.603 | 1041.565 | 1043.542 | 1051.665 |         |
|                     | 1057.564 | 1060.563 | 1063.589 | 1070.578 | 1085.600 | 1088.662 |         |
|                     | 1091.572 | 1097.649 | 1107.636 | 1112.231 | 1118.659 | 1125.601 |         |
|                     | 1132.632 | 1138.641 | 1139.595 | 1145.668 | 1146.557 | 1150.616 |         |
|                     | 1156.626 | 1157.611 | 1163.663 | 1169.593 | 1176.691 | 1184.622 |         |
|                     | 1191.650 | 1208.762 | 1210.658 | 1218.631 | 1220.629 | 1228.683 |         |
|                     | 1231.657 | 1238.587 | 1239.629 | 1241.715 | 1249.648 | 1251.719 |         |
|                     | 1259.684 | 1264.705 | 1268.585 | 1275.666 | 1282.670 | 1285.733 |         |
|                     | 1292.765 | 1293.563 | 1303.725 | 1305.500 | 1312.757 | 1317.638 |         |
|                     | 1320.596 | 1324.683 | 1328.434 | 1335.705 | 1337.723 | 1348.551 |         |
|                     | 1353.622 | 1356.719 | 1359.572 | 1366.778 | 1368.795 | 1373.655 |         |

|          |          |          |          |          |          |
|----------|----------|----------|----------|----------|----------|
| 1380.774 | 1391.800 | 1394.438 | 1401.157 | 1401.761 | 1403.652 |
| 1412.644 | 1417.379 | 1424.762 | 1431.401 | 1438.719 | 1445.442 |
| 1452.847 | 1455.748 | 1462.948 | 1464.750 | 1469.779 | 1482.865 |
| 1485.459 | 1492.784 | 1493.694 | 1500.727 | 1501.588 | 1511.804 |
| 1519.798 | 1520.375 | 1521.740 | 1526.734 | 1529.813 | 1536.956 |
| 1537.801 | 1540.733 | 1543.773 | 1547.769 | 1555.884 | 1557.797 |
| 1564.766 | 1565.884 | 1568.683 | 1575.810 | 1579.794 | 1581.427 |
| 1584.695 | 1591.777 | 1597.665 | 1605.694 | 1611.364 | 1619.617 |
| 1620.565 | 1623.819 | 1631.886 | 1635.778 | 1638.883 | 1646.933 |
| 1647.808 | 1650.706 | 1655.715 | 1664.768 | 1668.781 | 1675.802 |
| 1683.887 | 1684.716 | 1692.795 | 1695.732 | 1705.784 | 1713.746 |
| 1721.838 | 1722.816 | 1725.780 | 1733.788 | 1734.910 | 1737.744 |
| 1741.760 | 1749.805 | 1752.764 | 1757.757 | 1765.953 | 1769.775 |
| 1781.606 | 1790.855 | 1795.902 | 1797.900 | 1801.813 | 1809.940 |
| 1818.429 | 1819.003 | 1821.876 | 1829.875 | 1830.998 | 1836.477 |
| 1844.768 | 1853.599 | 1859.896 | 1866.930 | 1875.406 | 1876.835 |
| 1885.188 | 1886.884 | 1898.925 | 1906.915 | 1918.991 | 1930.927 |
| 1940.942 | 1952.976 | 1956.787 | 1963.943 | 1989.091 | 1993.990 |
| 2005.102 | 2015.036 | 2030.907 | 2035.007 | 2043.096 | 2054.131 |
| 2058.009 | 2066.144 | 2074.018 | 2098.042 | 2104.154 | 2111.173 |
| 2120.963 | 2130.993 | 2136.189 | 2140.175 | 2150.282 | 2152.969 |
| 2162.073 | 2164.077 | 2170.160 | 2181.879 | 2186.096 | 2192.021 |
| 2195.112 | 2204.368 | 2208.196 | 2220.239 | 2222.049 | 2228.149 |
| 2232.093 | 2235.181 | 2245.095 | 2258.199 | 2267.234 | 2275.066 |
| 2280.145 | 2283.202 | 2292.126 | 2296.062 | 2308.116 | 2310.317 |
| 2315.274 | 2337.170 | 2346.199 | 2349.201 | 2355.147 | 2363.163 |
| 2367.290 | 2376.377 | 2379.367 | 2389.300 | 2394.340 | 2399.056 |
| 2410.022 | 2418.263 | 2424.130 | 2433.159 | 2436.184 | 2440.309 |
| 2450.102 | 2452.236 | 2455.339 | 2466.400 | 2469.278 | 2479.297 |
| 2481.176 | 2493.303 | 2502.495 | 2509.273 | 2526.410 | 2537.223 |
| 2550.270 | 2560.281 | 2566.011 | 2568.263 | 2580.260 | 2590.159 |
| 2597.330 | 2609.566 | 2614.283 | 2626.422 | 2635.613 | 2645.479 |
| 2653.247 | 2662.345 | 2667.179 | 2679.406 | 2691.100 | 2695.365 |
| 2707.375 | 2720.395 | 2723.277 | 2737.464 | 2749.320 | 2752.323 |
| 2765.310 | 2780.280 | 2792.691 | 2795.504 | 2809.306 | 2822.283 |
| 2833.281 | 2839.381 | 2852.534 | 2866.440 | 2870.373 | 2880.489 |
| 2886.349 | 2896.528 | 2904.474 | 2914.541 | 2926.446 | 2933.776 |
| 2937.462 | 2950.366 | 2961.721 | 2965.499 | 2978.279 | 2984.606 |
| 2992.156 | 3004.477 | 3010.352 | 3016.564 | 3022.081 | 3028.677 |



|          |          |          |          |          |          |
|----------|----------|----------|----------|----------|----------|
| 3034.129 | 3045.309 | 3048.470 | 3051.595 | 3063.665 | 3075.534 |
| 3086.491 | 3088.887 | 3092.745 | 3104.445 | 3107.712 | 3110.679 |
| 3123.467 | 3126.669 | 3139.490 | 3150.862 | 3154.569 | 3160.398 |
| 3171.543 | 3177.654 | 3188.677 | 3199.718 | 3203.606 | 3207.688 |
| 3218.762 | 3230.659 | 3241.543 | 3247.644 | 3259.479 | 3264.635 |
| 3277.426 | 3289.857 | 3292.717 | 3304.556 | 3317.347 | 3320.840 |
| 3325.733 | 3337.631 | 3346.550 | 3353.802 | 3365.086 | 3367.744 |
| 3378.777 | 3381.792 | 3392.809 | 3396.694 | 3399.758 | 3410.725 |
| 3424.823 | 3429.792 | 3441.518 | 3456.511 | 3468.481 | 3573.716 |

**Tolerance** 13.00 ppm  
**(mon)**

**Number of** 416  
**Peptides**

# Laboratory of Mass Spectrometry and Gaseous Ion Chemistry

## PROWL

- **ProFound**
- **ProteinInfo**
- **PeptideMap**
- **PepFrag**
- **X! Tandem**
- **X! Hunter**
- **GPMDB**
- **PROWL Home**
- **Chait Lab**

## ProFound



### Protein Candidates

| Rank | Expectation            | Protein Information and Sequence Analyse Tools (T)       | %  | pI  | kDa   | R                                |
|------|------------------------|----------------------------------------------------------|----|-----|-------|----------------------------------|
| 1    | 5.1 × 10 <sup>-5</sup> | gi 14269568 ref NP_113843.1  latexin [Rattus norvegicus] | 17 | 5.8 | 26.36 | <input checked="" type="radio"/> |

### NOTE:

1. To search again using **unmatched masses**, click the symbol .

### Input Summary

**Search id** AB0AA9F7-0EE8-5B7121BA

**Sequences** 20073

**Date & Time** Fri Mar 30 17:21:36 2007 UTC (Search Time: 0.27 sec.)

**Sample ID** 20061228 NIA MRich spot 4212 search 20070330 number 1

**Database** NCBI nr [..\databases\nr]

**Taxonomy** Rattus

**Mass Range** 15 - 35 kDa

**pI Range** 4.0 -7.0

**Digestion** Trypsin

**Missed Cuts** 0

**Modifications** +C2H3ON@C(Complete); +CH2N2@K(Complete);

**Charge State** MH+

**Masses (avg)**

**Tolerance (avg)** 1.00 ppm



The Rockefeller University  
1230 York Avenue,  
New York, NY 10021  
(212) 327-8000



**National Center for  
Research Resources**

National Resource  
for the Mass Spectrometric  
Analysis of Biological  
Macromolecules

|                     |          |          |          |          |          |          |         |
|---------------------|----------|----------|----------|----------|----------|----------|---------|
| <b>Masses (mon)</b> | 663.322  | 668.682  | 696.735  | 724.767  | 753.802  | 767.798  | 797.853 |
|                     | 832.323  | 841.876  | 1030.494 | 1220.602 | 1268.608 | 1280.622 |         |
|                     | 1330.619 | 1568.755 | 1695.800 | 1713.796 | 1757.843 | 1779.859 |         |
|                     | 1838.858 | 1854.876 | 1895.880 | 1929.907 | 1931.904 | 1949.902 |         |
|                     | 1957.910 | 1966.914 | 1984.930 | 2006.919 | 2007.918 | 2021.936 |         |
|                     | 2024.936 | 2025.923 | 2038.952 | 2039.947 | 2044.949 | 2045.967 |         |
|                     | 2047.956 | 2048.948 | 2055.958 | 2056.964 | 2070.981 | 2098.992 |         |
|                     | 2120.995 | 2121.998 | 2131.008 | 2150.003 | 2167.052 | 2181.047 |         |
|                     | 2209.082 | 2225.108 | 2241.133 | 2242.137 | 2348.152 | 2349.149 |         |
|                     | 2364.123 | 2365.154 | 2374.167 | 2375.125 | 2392.169 | 2397.135 |         |
|                     | 2398.155 | 2405.144 | 2418.155 | 2435.196 | 2436.184 | 2447.143 |         |
|                     | 2448.153 | 2453.178 | 2454.156 | 2460.162 | 2463.147 | 2464.198 |         |
|                     | 2479.180 | 2495.164 | 2506.148 | 2507.182 | 2516.174 | 2535.146 |         |
|                     | 2536.172 | 2539.150 | 2540.189 | 2550.177 | 2551.188 | 2556.193 |         |
|                     | 2557.191 | 2564.205 | 2565.184 | 2575.175 | 2576.209 | 2580.200 |         |
|                     | 2606.229 | 2607.204 | 2613.165 | 2614.206 | 2622.204 | 2638.222 |         |
|                     | 2639.211 | 2650.215 | 2651.240 | 2666.219 | 2668.227 | 2680.226 |         |
|                     | 2681.237 | 2687.233 | 2688.218 | 2693.228 | 2700.253 | 2701.254 |         |
|                     | 2718.262 | 2719.230 | 2724.275 | 2725.236 | 2731.254 | 2732.268 |         |
|                     | 2745.240 | 2752.284 | 2762.298 | 2763.239 | 2770.255 | 2771.244 |         |
|                     | 2784.293 | 2785.299 | 2789.277 | 2790.258 | 2795.267 | 2796.290 |         |
|                     | 2803.286 | 2804.267 | 2818.314 | 2819.287 | 2823.300 | 2824.292 |         |
|                     | 2832.299 | 2833.295 | 2838.270 | 2839.292 | 2848.282 | 2849.301 |         |
|                     | 2866.294 | 2886.372 | 2895.354 | 2896.356 | 2906.356 | 2914.362 |         |
|                     | 2922.350 | 2934.340 | 2935.335 | 2952.365 | 2953.332 | 2961.347 |         |
|                     | 2962.321 | 2968.400 | 2969.349 | 2981.338 | 2982.359 | 2992.359 |         |
|                     | 2993.336 | 3004.371 | 3010.338 | 3011.371 | 3018.369 | 3029.428 |         |
|                     | 3047.432 | 3048.311 | 3051.404 | 3052.398 | 3064.402 | 3065.382 |         |
|                     | 3077.435 | 3094.485 | 3095.462 | 3107.431 | 3112.434 | 3138.467 |         |
|                     | 3147.436 | 3148.444 | 3175.424 | 3176.434 | 3187.457 | 3202.434 |         |
|                     | 3203.463 | 3212.462 | 3213.455 | 3218.479 | 3228.448 | 3244.491 |         |
|                     | 3245.466 | 3262.490 | 3275.478 | 3291.459 | 3301.533 | 3302.538 |         |
|                     | 3307.453 | 3308.429 | 3314.477 | 3316.501 | 3327.444 | 3329.527 |         |
|                     | 3338.510 | 3339.391 | 3346.491 | 3347.503 | 3356.632 | 3369.559 |         |
|                     | 3377.499 | 3378.523 | 3384.518 | 3385.542 | 3389.511 | 3390.519 |         |
|                     | 3396.486 | 3406.535 | 3407.474 | 3415.526 | 3416.518 | 3422.546 |         |
|                     | 3423.426 | 3446.530 | 3447.550 | 3459.589 | 3460.491 | 3465.556 |         |
|                     | 3470.547 | 3481.568 | 3482.543 | 3493.462 | 3494.527 | 3499.623 |         |
|                     | 3512.529 | 3513.636 | 3530.629 | 3538.601 | 3549.583 | 3565.594 |         |



|          |          |          |          |          |          |
|----------|----------|----------|----------|----------|----------|
| 3570.545 | 3581.583 | 3596.548 | 3603.626 | 3620.619 | 3624.675 |
| 3638.655 | 3657.672 | 3682.656 | 3695.656 | 3711.682 | 3722.703 |
| 3742.658 | 3754.674 | 3770.676 | 3781.680 | 3787.767 | 3798.716 |
| 3803.663 | 3815.666 | 3830.698 | 3847.679 | 3864.704 | 3877.703 |
| 3889.729 | 3907.712 | 3917.709 | 3923.739 | 3933.710 | 3949.781 |
| 3970.759 | 3987.740 | 4003.829 | 4010.814 | 4019.802 | 4028.768 |
| 4034.758 | 4046.827 | 4055.821 | 4066.806 | 4082.891 | 4092.734 |
| 4100.775 | 4113.922 | 4152.871 | 4185.716 | 4190.851 | 4206.879 |
| 4218.729 | 4236.683 | 4250.442 | 4278.876 | 4300.904 | 4317.274 |
| 4644.422 |          |          |          |          |          |

**Tolerance** 8.00 ppm  
**(mon)**

**Number of** 290  
**Peptides**

# Laboratory of Mass Spectrometry and Gaseous Ion Chemistry

## PROWL

- ▶ [ProFound](#)
- ▶ [ProteinInfo](#)
- ▶ [PeptideMap](#)
- ▶ [PepFrag](#)
- ▶ [X! Tandem](#)
- ▶ [X! Hunter](#)
- ▶ [GPMDB](#)
- ▶ [PROWL Home](#)
- ▶ [Chait Lab](#)



The Rockefeller University  
1230 York Avenue,  
New York, NY 10021  
(212) 327-8000



**National Center for  
Research Resources**

National Resource  
for the Mass Spectrometric  
Analysis of Biological  
Macromolecules

## ProFound



### Protein Candidates

| Rank | Expectation          | Protein Information and Sequence Analyse Tools (T)                                                              | %  | pI  | kDa   | R |
|------|----------------------|-----------------------------------------------------------------------------------------------------------------|----|-----|-------|---|
| 1    | 6.5×10 <sup>-8</sup> | gi 11968064 ref NP_071944.1  parvalbumin [Rattus norvegicus]                                                    | 38 | 5.0 | 12.58 | ⊙ |
| 2    | 3.4×10 <sup>-5</sup> | gi 6900834 emb CAB71514.1  immunoglobulin heavy chain variable region [Rattus norvegicus]                       | 46 | 5.2 | 11.43 | ⊙ |
| 3    | 4.0×10 <sup>-5</sup> | gi 205413 gb AAA41599.1  MHC truncated antigen                                                                  | 27 | 4.8 | 12.35 | ⊙ |
| 4    | 8.2×10 <sup>-5</sup> | gi 27574128 pdb 1N7S B Chain B, High Resolution Structure Of A Truncated Neuronal Snare Complex                 | 71 | 4.8 | 7.99  | ⊙ |
| 5    | 1.4×10 <sup>-4</sup> | gi 52696058 pdb 1URQ B Chain B, Crystal Structure Of Neuronal Q-Snares In Complex With R-Snare Motif Of Tomosyn | 64 | 5.1 | 8.89  | ⊙ |
| 6    | 1.9×10 <sup>-4</sup> | gi 6729810 pdb 1SFC B Chain B, Neuronal Synaptic Fusion Complex                                                 | 58 | 5.1 | 9.82  | ⊙ |
| 7    | 2.9×10 <sup>-4</sup> | gi 15987986 pdb 1G33 A Chain A, Crystal Structure Of Rat Parvalbumin Without The N-Terminal Domain              | 38 | 4.6 | 8.26  | ⊙ |
| 8    | 5.8×10 <sup>-4</sup> | gi 32185283 gb AAO64469.1  BCL-WS [Rattus norvegicus]                                                           | 46 | 4.9 | 8.63  | ⊙ |
| 9    | 7.4×10 <sup>-4</sup> | gi 55669693 pdb 1S3P A Chain A, Crystal Structure Of Rat Alpha-Parvalbumin S55dE59D MUTANT                      | 26 | 4.9 | 12.46 | ⊙ |
| 10   | 7.4×10 <sup>-4</sup> | gi 494573 pdb 1RTP 1 Chain 1, Alpha-Parvalbumin                                                                 | 26 | 5.0 | 12.45 | ⊙ |
| 11   | 1.3×10 <sup>-3</sup> | gi 205601 gb AAA41660.1  myosin light chain 2                                                                   | 29 | 4.7 | 11.70 | ⊙ |
| 12   | 1.7×10 <sup>-3</sup> | gi 203239 gb AAA40853.1  intestinal calcium-binding protein                                                     | 30 | 5.0 | 9.65  | ⊙ |
| 13   | 6.5×10 <sup>-3</sup> | gi 27545440 ref NP_775459.1  CaM-kinase II inhibitor alpha [Rattus norvegicus]                                  | 29 | 5.2 | 8.80  | ⊙ |
| 14   | 0.013                | gi 27065383 pdb 1LJ0 A Chain A, Structure Of Quintuple Mutant Of The Rat Outer Mitochondrial Cytochrome B5.     | 28 | 4.8 | 10.56 | ⊙ |
| 15   | 0.013                | gi 15988286 pdb 1ICC A Chain A, Rat Outer Mitochondrial Membrane Cytochrome B5                                  | 30 | 4.9 | 10.14 | ⊙ |

|    |       |                                                                                                                                                                                |    |     |       |  |
|----|-------|--------------------------------------------------------------------------------------------------------------------------------------------------------------------------------|----|-----|-------|--|
| 16 | 0.014 | <a href="#">gi 27721221 ref XP_217235.1 </a> PREDICTED: similar to RING-box protein 2 (Rbx2) (RING finger protein 7) (Sensitive to apoptosis gene protein) [Rattus norvegicus] | 20 | 5.2 | 13.67 |  |
| 17 | 0.017 | <a href="#">gi 56605674 ref NP_001008279.1 </a> hypothetical protein LOC287278 [Rattus norvegicus]                                                                             | 27 | 5.1 | 13.53 |  |

## NOTE:

- To search again using [unmatched masses](#), click the symbol .

**Input Summary****Search id** B109C9CD-0938-61212746**Sequences** 20092**Date & Time** Mon Jan 29 17:20:58 2007 UTC (Search Time: 0.28 sec.)**Sample ID****Database** NCBI nr [..\databases\nr]**Taxonomy** Rattus**Mass Range** 4 - 14 kDa**pI Range** 4.5 -5.5**Digestion** Trypsin**Missed Cuts** 1**Modifications** +C2H3ON@C(Complete); +CH2N2@K(Complete);**Charge State** MH+**Masses (avg)****Tolerance (avg)** 1.00 ppm

**Masses (mon)** 616.435 640.664 654.687 656.636 668.694 696.734 710.749  
719.385 722.748 724.768 725.772 738.785 739.776 740.765  
753.802 754.805 766.812 778.813 795.824 797.856 811.868  
824.498 850.447 853.410 918.466 920.464 948.524 955.504  
990.548 1005.541 1013.522 1028.534 1058.495 1064.528  
1087.545 1091.542 1145.567 1177.591 1195.594 1202.566  
1217.647 1220.596 1223.605 1233.634 1240.581 1244.598  
1248.602 1262.613 1265.633 1268.608 1282.642 1291.616  
1329.633 1333.657 1432.738 1456.708 1469.713 1504.710  
1529.739 1542.767 1559.780 1568.763 1601.794 1624.769  
1665.762 1684.763 1713.806 1757.874 1894.891 1928.901



|          |          |          |          |          |          |
|----------|----------|----------|----------|----------|----------|
| 1933.841 | 2091.037 | 2167.072 | 2172.061 | 2180.090 | 2181.056 |
| 2209.115 | 2314.121 | 2315.131 | 2355.158 | 2364.155 | 2374.133 |
| 2379.176 | 2381.173 | 2390.106 | 2392.199 | 2398.200 | 2399.149 |
| 2408.227 | 2425.190 | 2435.111 | 2448.153 | 2463.134 | 2464.196 |
| 2486.197 | 2495.135 | 2505.113 | 2522.166 | 2531.103 | 2532.155 |
| 2555.152 | 2594.167 | 2607.215 | 2650.229 | 2674.240 | 2701.223 |
| 2707.383 | 2744.179 | 2763.215 | 3052.288 | 3060.419 | 3061.403 |
| 3078.433 | 3080.413 | 3081.292 | 3094.386 | 3104.381 | 3105.358 |
| 3112.469 | 3135.373 | 3140.384 | 3141.430 | 3190.489 | 3191.498 |
| 3220.525 | 3232.416 | 3233.575 | 3273.463 | 3274.471 | 3278.464 |
| 3279.435 | 3281.480 | 3282.376 | 3291.521 | 3316.473 | 3326.683 |
| 3336.515 | 3337.373 | 3340.445 | 3355.515 | 3369.455 | 3516.558 |
| 3617.587 | 3704.511 | 3736.697 | 3912.638 | 4183.928 | 4515.600 |

**Tolerance** 41.00 ppm  
**(mon)**

**Number of** 148  
**Peptides**

# Laboratory of Mass Spectrometry and Gaseous Ion Chemistry

## PROWL

- ▶ **ProFound**
- ▶ **ProteinInfo**
- ▶ **PeptideMap**
- ▶ **PepFrag**
- ▶ **X! Tandem**
- ▶ **X! Hunter**
- ▶ **GPMDDB**
- ▶ **PROWL Home**
- ▶ **Chait Lab**



The Rockefeller University  
1230 York Avenue,  
New York, NY 10021  
(212) 327-8000



**National Center for  
Research Resources**

National Resource  
for the Mass Spectrometric  
Analysis of Biological  
Macromolecules

## ProFound



### Protein Candidates

| Rank | Expectation          | Protein Information and Sequence Analyse Tools (T)                                                                                     | %  | pI  | kDa   | R |
|------|----------------------|----------------------------------------------------------------------------------------------------------------------------------------|----|-----|-------|---|
| 1    | 2.7×10 <sup>-9</sup> | gi 554476 gb AAA41655.1  myosin heavy chain                                                                                            | 49 | 5.3 | 20.16 | ⊙ |
| 2    | 7.3×10 <sup>-7</sup> | gi 1065013 pdb 1RSY  Chain , Synaptotagmin I (First C2 Domain) (Calb)                                                                  | 32 | 5.0 | 17.69 | ⊙ |
| 3    | 1.2×10 <sup>-4</sup> | gi 56605732 ref NP_001008328.1  family with sequence similarity 96, member A [Rattus norvegicus]                                       | 48 | 4.7 | 18.99 | ⊙ |
| +4   | 4.4×10 <sup>-4</sup> | gi 228542 prf  1805343A myosin:SUBUNIT=regulatory light chain                                                                          | 40 | 4.7 | 20.32 | ⊙ |
| -    | -                    | gi 2119365 pir  S45709 myosin regulatory light chain 2, brain (clone FY53) - rat                                                       | 40 | 4.7 | 20.45 | ⊙ |
| -    | -                    | gi 27711040 ref XP_216161.1  PREDICTED: similar to Mitotic spindle assembly checkpoint protein MAD2A (MAD2-like 1) [Rattus norvegicus] | 26 | 5.1 | 24.24 | ⊙ |
| -    | -                    | gi 2674183 gb AAB88701.1  kinesin-related protein KRP4 [Rattus norvegicus]                                                             | 40 | 4.9 | 17.37 | ⊙ |
| -    | -                    | gi 47155821 gb AAT11858.1  dopamine- and cAMP-regulated phosphoprotein DARPP-32 [Rattus norvegicus]                                    | 32 | 4.5 | 23.29 | ⊙ |
| -    | -                    | gi 56090345 ref NP_001007739.1  hypothetical protein LOC361744 [Rattus norvegicus]                                                     | 55 | 4.9 | 20.66 | ⊙ |
| -    | -                    | gi 7381175 gb AAF61422.1 AF136282_1 apoptotic death agonist BID [Rattus norvegicus]                                                    | 36 | 4.8 | 22.57 | ⊙ |
| -    | -                    | gi 12083631 ref NP_073175.1  BH3 interacting domain death agonist [Rattus norvegicus]                                                  | 36 | 4.8 | 22.54 | ⊙ |
| -    | -                    | gi 554496 gb AAA41953.1  proline-rich protein                                                                                          | 33 | 5.1 | 20.37 | ⊙ |
| -    | -                    | gi 34879746 ref XP_344141.1  PREDICTED: similar to solute carrier family 41, member 1 [Rattus norvegicus]                              | 49 | 4.6 | 17.94 | ⊙ |

|   |                                                                                                                                                                        |    |     |       |  |
|---|------------------------------------------------------------------------------------------------------------------------------------------------------------------------|----|-----|-------|--|
| - | <a href="#">gi 57870401 gb AAH89061.1 </a> Thyroid hormone responsive protein [Rattus norvegicus]                                                                      | 30 | 4.8 | 17.48 |  |
| - | <a href="#">gi 2765346 emb CAA73919.1 </a> calpastatin [Rattus norvegicus]                                                                                             | 35 | 4.8 | 19.68 |  |
| - | <a href="#">gi 7107454 gb AAF36411.1 AF235993_1</a> Bax protein splice variant k [Rattus norvegicus]                                                                   | 27 | 5.1 | 20.09 |  |
| - | <a href="#">gi 12964662 dbj BAB32668.1 </a> branched-chain alpha-keto acid dihydrolipoyl acyltransferase [Rattus norvegicus]                                           | 37 | 5.2 | 21.49 |  |
| - | <a href="#">gi 56090259 ref NP_001007668.1 </a> spermidine/spermine N1-acetyl transferase [Rattus norvegicus]                                                          | 29 | 5.2 | 20.74 |  |
| - | <a href="#">gi 39654405 pdb 1P1D A</a> Chain A, Structural Insights Into The Inter-Domain Chaperoning Of Tandem PdZ Domains In Glutamate Receptor Interacting Proteins | 32 | 4.7 | 21.79 |  |
| - | <a href="#">gi 1929922 gb AAB51478.1 </a> anti-idiotypic immunoglobulin M heavy chain [Rattus norvegicus]                                                              | 33 | 4.7 | 19.62 |  |

## NOTE:

1. To search again using **unmatched masses**, click the symbol .
2. Highly similar protein sequences were given the same rank (click "+" to expand/contract).

**Input Summary****Search id** B058773B-09E8-60712696**Sequences** 20092**Date & Time** Tue Jan 30 17:22:36 2007 UTC (Search Time: 0.33 sec.)**Sample ID****Database** NCBI nr [..\databases\nr]**Taxonomy** Rattus**Mass Range** 17 - 25 kDa**pI Range** 4.5 -5.3**Digestion** Trypsin**Missed Cuts** 1**Modifications** +C2H3ON@C(Complete); +O@M(Partial); +HPO3@STY (Partial); +CH2N2@K(Complete);**Charge State** MH+

**Masses (avg)****Tolerance (avg)** 1.00 ppm

**Masses (mon)** 662.306 750.781 832.308 841.474 848.444 918.509 938.475  
991.513 1063.501 1080.490 1177.582 1194.604 1211.581  
1219.610 1223.605 1248.603 1291.616 1330.606 1333.650  
1560.772 1601.787 1666.777 1748.974 1757.857 1762.823  
1765.828 1779.861 1808.832 1837.850 1893.874 1904.843  
1932.893 1949.928 1965.915 1982.927 1992.919 2021.935  
2035.963 2036.962 2042.947 2043.961 2045.950 2046.962  
2053.957 2054.952 2072.989 2096.975 2122.011 2181.050  
2209.087 2291.132 2298.156 2314.120 2315.097 2339.152  
2341.186 2348.163 2349.164 2364.137 2365.154 2375.160  
2376.178 2392.219 2397.152 2398.148 2419.174 2433.186  
2448.173 2460.160 2465.191 2466.190 2486.189 2487.195  
2497.199 2504.157 2506.157 2534.192 2535.206 2554.184  
2555.186 2558.198 2559.207 2577.213 2593.178 2609.215  
2610.195 2632.193 2633.174 2637.189 2638.211 2648.209  
2649.211 2655.230 2656.234 2673.226 2674.215 2690.246  
2691.235 2723.225 2724.243 2731.267 2732.253 2747.246  
2748.242 2763.252 2764.248 2775.274 2776.278 2785.277  
2786.284 2794.275 2795.289 2804.271 2805.263 2809.279  
2810.291 2819.297 2820.289 2832.299 2833.291 2837.297  
2838.288 2849.281 2850.297 2868.351 2885.322 2886.337  
2894.321 2895.320 2904.328 2914.359 2922.331 2949.348  
2953.326 2954.330 2964.341 2965.333 2980.337 2981.364  
2994.356 2995.351 3002.399 3003.357 3011.360 3012.370  
3020.383 3029.461 3047.477 3060.394 3061.403 3075.392  
3083.359 3084.368 3105.410 3112.388 3136.424 3172.461  
3173.439 3182.450 3183.441 3198.463 3202.446 3203.446  
3210.451 3220.478 3228.462 3232.490 3233.470 3244.508  
3245.476 3262.553 3274.477 3275.473 3292.541 3314.502  
3325.531 3326.553 3342.481 3353.564 3354.583 3366.515  
3367.546 3372.519 3373.516 3385.682 3386.526 3399.505  
3400.533 3417.534 3418.525 3428.531 3429.566 3437.547  
3438.536 3447.543 3448.591 3461.542 3462.602 3468.573  
3469.566 3480.554 3481.586 3491.563 3492.542 3507.553  
3516.572 3521.599 3530.594 3537.607 3541.573 3550.586  
3566.582 3577.576 3589.629 3603.648 3615.596 3621.618  
3639.605 3651.640 3664.643 3680.648 3694.635 3710.667



|          |          |          |          |          |          |
|----------|----------|----------|----------|----------|----------|
| 3725.706 | 3730.714 | 3739.650 | 3753.680 | 3769.700 | 3782.738 |
| 3797.690 | 3801.659 | 3814.712 | 3824.734 | 3832.686 | 3844.713 |
| 3860.717 | 3868.656 | 3877.744 | 3887.760 | 3893.718 | 3907.768 |
| 3922.747 | 3931.728 | 3938.768 | 3947.736 | 3962.777 | 3973.790 |
| 3983.830 | 3995.819 | 4002.844 | 4010.825 | 4035.844 | 4054.826 |
| 4063.870 | 4074.834 | 4083.902 | 4100.815 | 4104.839 | 4112.887 |
| 4128.856 | 4145.862 | 4156.837 | 4166.925 | 4181.838 | 4194.874 |
| 4205.893 | 4220.927 | 4243.846 | 4251.076 | 4270.333 | 4307.685 |
| 4473.841 |          |          |          |          |          |

**Tolerance** 15.00 ppm  
**(mon)**

**Number of** 272  
**Peptides**

# Laboratory of Mass Spectrometry and Gaseous Ion Chemistry

## PROWL

- ▶ **ProFound**
- ▶ **ProteinInfo**
- ▶ **PeptideMap**
- ▶ **PepFrag**
- ▶ **X! Tandem**
- ▶ **X! Hunter**
- ▶ **GPMDDB**
- ▶ **PROWL Home**
- ▶ **Chait Lab**

## ProFound



### Protein Candidates

| Rank | Expectation            | Protein Information and Sequence Analyse Tools (T)                                                                                                                                                               | %  | pI  | kDa   | R |
|------|------------------------|------------------------------------------------------------------------------------------------------------------------------------------------------------------------------------------------------------------|----|-----|-------|---|
| 1    | 4.1 × 10 <sup>-9</sup> | gi 15824045 dbj BAB68551.1  TAFIIB [Rattus norvegicus]                                                                                                                                                           | 48 | 5.5 | 14.16 | ⊙ |
| +2   | 4.8 × 10 <sup>-8</sup> | gi 45267819 ref NP_571989.2  caveolin 2 [Rattus norvegicus]                                                                                                                                                      | 46 | 5.3 | 18.81 | ⊙ |
|      | -                      | gi 38322757 gb AAR16307.1  caveolin 2 [Rattus norvegicus]                                                                                                                                                        | 30 | 5.3 | 18.78 | ⊙ |
| 3    | 1.1 × 10 <sup>-7</sup> | gi 11141738 gb AAG32053.1  complement component 7 [Rattus norvegicus]                                                                                                                                            | 67 | 5.4 | 16.33 | ⊙ |
| 4    | 5.7 × 10 <sup>-4</sup> | gi 26992096 gb AAN86738.1  homeobox prot-oncogene [Rattus sp.]                                                                                                                                                   | 55 | 5.0 | 14.75 | ⊙ |
| 5    | 6.9 × 10 <sup>-4</sup> | gi 12408324 ref NP_074055.1  complexin 1 [Rattus norvegicus]                                                                                                                                                     | 35 | 4.9 | 15.92 | ⊙ |
| 6    | 8.5 × 10 <sup>-4</sup> | gi 12018254 ref NP_072115.1  transcription elongation factor B (SIII), polypeptide 1 [Rattus norvegicus]                                                                                                         | 78 | 4.7 | 12.88 | ⊙ |
| 7    | 1.3 × 10 <sup>-3</sup> | gi 34856632 ref XP_342484.1  PREDICTED: similar to zinc finger, CSL-type containing 3 [Rattus norvegicus]                                                                                                        | 49 | 4.7 | 17.85 | ⊙ |
| 8    | 1.7 × 10 <sup>-3</sup> | gi 230180 pdb 1MSB A Chain A, Mannose Binding Protein A (Lectin Domain) Complex With Holmium                                                                                                                     | 38 | 5.3 | 13.22 | ⊙ |
|      | -                      | gi 34858175 ref XP_227370.2  PREDICTED: similar to Farnesyl pyrophosphate synthetase (FPP synthetase) (FPS) (Farnesyl diphosphate synthetase) (Cholesterol-regulated 39 kDa protein) (CR 39) [Rattus norvegicus] | 45 | 5.4 | 19.48 | ⊙ |
|      | -                      | gi 56605732 ref NP_001008328.1  family with sequence similarity 96, member A [Rattus norvegicus]                                                                                                                 | 34 | 4.7 | 18.99 | ⊙ |
|      | -                      | gi 27689593 ref XP_226974.1  PREDICTED: similar to eukaryotic translation initiation factor 5A2 [Rattus norvegicus]                                                                                              | 38 | 5.4 | 17.71 | ⊙ |
|      | -                      | gi 6683092 dbj BAA89032.1  R-ras GTPase activating protein [Rattus norvegicus]                                                                                                                                   | 27 | 5.4 | 14.73 | ⊙ |
|      | -                      | gi 1675351 gb AAB19106.1  inositol monophosphate [Rattus norvegicus]                                                                                                                                             | 49 | 4.9 | 9.96  | ⊙ |

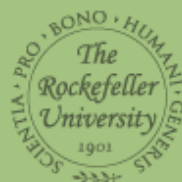

The Rockefeller University  
1230 York Avenue,  
New York, NY 10021  
(212) 327-8000



**National Center for  
Research Resources**

National Resource  
for the Mass Spectrometric  
Analysis of Biological  
Macromolecules

|   |                                                                                                                                                                                                                 |    |     |       |   |
|---|-----------------------------------------------------------------------------------------------------------------------------------------------------------------------------------------------------------------|----|-----|-------|---|
| - | gi 27669100 ref XP_216785.1  PREDICTED: similar to NADH-ubiquinone oxidoreductase E5SS subunit, mitochondrial precursor (Complex I-E5SS) (CI-E5SS) (Neuronal protein 15.6) (p15.6) (Np15.6) [Rattus norvegicus] | 31 | 5.1 | 17.78 | 🔴 |
| - | gi 13540630 ref NP_110459.1  brain lipid binding protein [Rattus norvegicus]                                                                                                                                    | 28 | 5.5 | 15.64 | 🔴 |
| - | gi 6689091 emb CAB65384.1  MAP19 protein [Rattus norvegicus]                                                                                                                                                    | 51 | 5.0 | 13.70 | 🔴 |
| - | gi 34855683 ref XP_214895.2  PREDICTED: similar to DNA-directed RNA polymerase II 14.5 kDa polypeptide (RPB9) (RPB14.5) [Rattus norvegicus]                                                                     | 44 | 5.0 | 15.23 | 🔴 |
| - | gi 51980674 gb AAH82106.1  Similar to RIKEN cDNA 4933415F23 [Rattus norvegicus]                                                                                                                                 | 18 | 4.6 | 17.16 | 🔴 |
| - | gi 2674183 gb AAB88701.1  kinesin-related protein KRP4 [Rattus norvegicus]                                                                                                                                      | 32 | 4.9 | 17.37 | 🔴 |
| - | gi 20302079 ref NP_620247.1  RS21-C6 protein [Rattus norvegicus]                                                                                                                                                | 21 | 4.8 | 18.79 | 🔴 |
| - | gi 15826396 pdb 1JEX A Chain A, Solution Structure Of A67v Mutant Of Rat Ferro Cytochrome B5                                                                                                                    | 41 | 5.2 | 11.23 | 🔴 |
| - | gi 6981316 ref NP_037128.1  oxytocin [Rattus norvegicus]                                                                                                                                                        | 44 | 5.3 | 14.06 | 🔴 |
| - | gi 27704684 ref XP_215938.1  PREDICTED: similar to WAP four-disulfide core domain 3 isoform 1 precursor [Rattus norvegicus]                                                                                     | 36 | 5.5 | 15.70 | 🔴 |
| - | gi 57526823 ref NP_001009621.1  NudC domain containing 2 [Rattus norvegicus]                                                                                                                                    | 34 | 5.0 | 18.21 | 🔴 |
| - | gi 34853142 ref XP_216020.2  PREDICTED: similar to Protein C9orf7 [Rattus norvegicus]                                                                                                                           | 25 | 5.4 | 19.01 | 🔴 |
| - | gi 294577 gb AAB59703.1  cystatin S [Rattus norvegicus]                                                                                                                                                         | 33 | 4.7 | 15.47 | 🔴 |
| - | gi 224985 prf  1205244A cytochrome b5                                                                                                                                                                           | 52 | 5.4 | 10.82 | 🔴 |
| - | gi 2914179 pdb 1AW3  Chain , The Solution Nmr Structure Of Oxidized Rat Mitochondrial Cytochrome B5, Minimized Average Structure                                                                                | 51 | 5.3 | 11.08 | 🔴 |

|   |                                                                                                                                                                                                           |    |     |       |   |
|---|-----------------------------------------------------------------------------------------------------------------------------------------------------------------------------------------------------------|----|-----|-------|---|
| - | gi 2554670 pdb 1AQA  Chain , Solution Structure Of Reduced Microsomal Rat Cytochrome B5, Nmr, Minimized Average Structure                                                                                 | 51 | 5.2 | 11.20 | 🔴 |
| - | gi 2098349 pdb 1IEU  Chain , Apocytochrome B5, Ph 6.2, 298 K, Nmr, 10 Structures                                                                                                                          | 49 | 5.0 | 11.61 | 🔴 |
| - | gi 3660010 pdb 1BFX  Chain , The Solution Nmr Structure Of The B Form Of Oxidized Rat Microsomal Cytochrome B5, Minimized Average Structure                                                               | 48 | 5.0 | 11.74 | 🔴 |
| - | gi 2257955 gb AAB67609.1  cytochrome b5 [Rattus norvegicus]                                                                                                                                               | 48 | 5.3 | 11.81 | 🔴 |
| - | gi 34863048 ref XP_347100.1  PREDICTED: hypothetical protein [Rattus norvegicus]                                                                                                                          | 40 | 4.9 | 13.42 | 🔴 |
| - | gi 11560046 ref NP_071581.1  cytochrome b-5 [Rattus norvegicus]                                                                                                                                           | 36 | 4.9 | 15.76 | 🔴 |
| - | gi 45478236 gb AAS66289.1  LRRGT00198 [Rattus norvegicus]                                                                                                                                                 | 52 | 4.9 | 10.53 | 🔴 |
| - | gi 57012392 ref NP_001008857.1  RT1 class Ib, locus H2-TL-like (S2) [Rattus norvegicus]                                                                                                                   | 27 | 5.5 | 19.59 | 🔴 |
| - | gi 55562787 gb AAH86338.1  LOC474154 protein [Rattus norvegicus]                                                                                                                                          | 22 | 5.5 | 16.82 | 🔴 |
| - | gi 758267 emb CAA26200.1  unnamed protein product [Rattus norvegicus]                                                                                                                                     | 27 | 5.4 | 18.54 | 🔴 |
| - | gi 92406 pir  A27390 Ig lambda-1 chain C region - rat                                                                                                                                                     | 39 | 5.3 | 12.17 | 🔴 |
| - | gi 204868 gb AAA41419.1  lambda-chain C1-region                                                                                                                                                           | 39 | 5.3 | 12.16 | 🔴 |
| - | gi 56090411 ref NP_001007653.1  polymerase (DNA directed), epsilon 3 (p17 subunit) [Rattus norvegicus]                                                                                                    | 17 | 4.7 | 17.44 | 🔴 |
| - | gi 24416601 gb AAM97286.1  CACNA1I splicing variant b [Rattus norvegicus]                                                                                                                                 | 41 | 4.6 | 12.66 | 🔴 |
| - | gi 34860679 ref XP_342576.1  PREDICTED: similar to Seminal vesicle secretory protein 6 precursor (Seminal vesicle secretory protein VI) (SVS VI) (Seminal vesicle protein 6) (SVSP99) [Rattus norvegicus] | 34 | 5.5 | 11.73 | 🔴 |
| - | gi 34933275 ref XP_346272.1  PREDICTED: similar to Huntingtin interacting protein M [Rattus norvegicus]                                                                                                   | 27 | 5.1 | 16.93 | 🔴 |



|   |                                                                                                                |    |     |       |  |
|---|----------------------------------------------------------------------------------------------------------------|----|-----|-------|--|
| - | <a href="#">gi 643039 emb CAA57089.1</a>   variable region-alpha RAV4.25<br>[Rattus norvegicus]                | 46 | 5.0 | 10.22 |  |
| - | <a href="#">gi 643041 emb CAA57090.1</a>   variable region-alpha RAV4.26<br>[Rattus norvegicus]                | 46 | 5.3 | 10.19 |  |
| - | <a href="#">gi 1065013 pdb 1RSY</a>   Chain , Synaptotagmin I (First C2<br>Domain) (Calb)                      | 22 | 5.0 | 17.69 |  |
| - | <a href="#">gi 27672880 ref XP_213347.1</a>   PREDICTED: similar to MAK31-<br>like protein [Rattus norvegicus] | 27 | 5.3 | 13.75 |  |

## NOTE:

1. To search again using **unmatched masses**, click the symbol .
2. Highly similar protein sequences were given the same rank (click "+" to expand/contract).

**Input Summary****Search id** B35459A1-06EC-636D2992**Sequences** 20092**Date & Time** Tue Jan 30 19:41:38 2007 UTC (Search Time: 0.28 sec.)**Sample ID****Database** NCBI nr [..\databases\nr]**Taxonomy** Rattus**Mass Range** 7 - 20 kDa**pI Range** 4.6 -5.6**Digestion** Trypsin**Missed Cuts** 1**Modifications** +C2H3ON@C(Complete); +O@M(Partial); +HPO3@STY  
(Partial); +CH2N2@K(Complete);**Charge State** MH+**Masses (avg)****Tolerance (avg)** 1.00 ppm

|                     |          |          |          |          |          |          |         |
|---------------------|----------|----------|----------|----------|----------|----------|---------|
| <b>Masses (mon)</b> | 664.340  | 791.406  | 817.420  | 823.441  | 848.439  | 902.463  | 938.474 |
|                     | 991.514  | 1064.512 | 1080.489 | 1194.572 | 1219.601 | 1223.599 |         |
|                     | 1291.613 | 1315.591 | 1323.662 | 1330.601 | 1333.638 | 1523.881 |         |
|                     | 1529.732 | 1559.770 | 1602.798 | 1664.762 | 1666.772 | 1684.796 |         |
|                     | 1695.785 | 1713.792 | 1720.803 | 1756.843 | 1762.828 | 1765.830 |         |
|                     | 1779.860 | 1838.857 | 1878.849 | 1893.872 | 1904.820 | 1908.891 |         |
|                     | 1928.905 | 1935.892 | 1948.918 | 1962.905 | 1984.913 | 1987.903 |         |
|                     | 2021.939 | 2035.952 | 2036.959 | 2042.948 | 2044.947 | 2045.946 |         |
|                     | 2051.964 | 2052.954 | 2070.951 | 2089.000 | 2096.980 | 2122.000 |         |
|                     | 2173.027 | 2181.045 | 2298.147 | 2299.157 | 2314.113 | 2315.086 |         |
|                     | 2339.135 | 2341.173 | 2364.129 | 2365.155 | 2376.179 | 2377.186 |         |
|                     | 2392.212 | 2419.167 | 2433.170 | 2458.156 | 2465.186 | 2466.196 |         |
|                     | 2497.190 | 2504.134 | 2505.115 | 2534.192 | 2535.191 | 2554.177 |         |
|                     | 2555.175 | 2561.194 | 2562.181 | 2577.206 | 2591.177 | 2609.204 |         |
|                     | 2610.185 | 2632.179 | 2633.162 | 2649.216 | 2650.199 | 2659.203 |         |
|                     | 2660.203 | 2667.203 | 2668.229 | 2673.234 | 2674.190 | 2690.211 |         |
|                     | 2692.213 | 2723.242 | 2724.237 | 2733.242 | 2734.245 | 2745.242 |         |
|                     | 2746.234 | 2764.267 | 2765.261 | 2776.261 | 2777.268 | 2784.269 |         |
|                     | 2785.273 | 2795.282 | 2802.271 | 2803.269 | 2805.281 | 2806.274 |         |
|                     | 2818.287 | 2819.274 | 2837.303 | 2838.298 | 2849.291 | 2850.283 |         |
|                     | 2866.316 | 2885.313 | 2886.317 | 2894.323 | 2895.325 | 2904.315 |         |
|                     | 2914.348 | 2949.343 | 2953.335 | 2954.327 | 2964.334 | 2965.330 |         |
|                     | 2979.339 | 2980.320 | 2994.339 | 2995.333 | 3001.401 | 3011.338 |         |
|                     | 3012.309 | 3020.368 | 3029.447 | 3033.396 | 3034.353 | 3046.404 |         |
|                     | 3047.454 | 3052.352 | 3053.336 | 3061.397 | 3068.352 | 3069.354 |         |
|                     | 3077.420 | 3084.356 | 3085.360 | 3102.388 | 3103.401 | 3111.365 |         |
|                     | 3112.376 | 3136.415 | 3172.448 | 3173.426 | 3182.438 | 3183.431 |         |
|                     | 3198.460 | 3208.442 | 3218.452 | 3230.481 | 3262.537 | 3273.479 |         |
|                     | 3290.563 | 3291.583 | 3316.478 | 3325.552 | 3326.544 | 3336.495 |         |
|                     | 3337.525 | 3353.572 | 3354.597 | 3368.616 | 3372.546 | 3373.515 |         |
|                     | 3383.546 | 3384.570 | 3393.513 | 3394.528 | 3400.527 | 3401.540 |         |
|                     | 3404.545 | 3416.522 | 3417.555 | 3429.532 | 3430.562 | 3436.532 |         |
|                     | 3446.528 | 3447.566 | 3453.529 | 3454.521 | 3462.523 | 3463.550 |         |
|                     | 3473.537 | 3474.534 | 3490.550 | 3491.541 | 3495.554 | 3496.563 |         |
|                     | 3509.556 | 3516.574 | 3525.576 | 3532.564 | 3540.554 | 3548.593 |         |
|                     | 3565.616 | 3575.617 | 3581.594 | 3589.589 | 3600.607 | 3621.621 |         |
|                     | 3637.604 | 3651.632 | 3663.616 | 3677.632 | 3698.647 | 3712.659 |         |
|                     | 3728.637 | 3742.627 | 3753.642 | 3758.694 | 3772.665 | 3781.652 |         |
|                     | 3786.688 | 3800.733 | 3812.713 | 3819.713 | 3827.689 | 3832.673 |         |

3843.716 3861.690 3867.656 3890.740 3911.775 4226.963

**Tolerance** 13.00 ppm  
**(mon)**

**Number of** 241  
**Peptides**

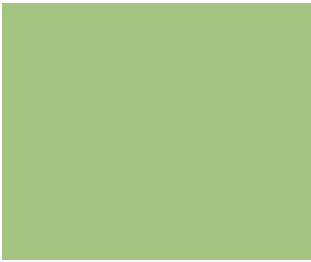

PROWL

- [ProFound](#)
- [ProteinInfo](#)
- [PeptideMap](#)
- [PepFrag](#)
- [X! Tandem](#)
- [X! Hunter](#)
- [GPMDB](#)
- [PROWL Home](#)
- [Chait Lab](#)

The Rockefeller  
University

The Rockefeller University  
1230 York Avenue,  
New York, NY 10021  
(212) 327-8000

National Center of  
Research Resources

National Resource  
for the Mass Spectrometric  
Analysis of Biological  
Macromolecules

## ProFound

## Protein Candidates

| Rank | Expectation           | Protein Information and Sequence Analyse Tools (T)                                                                                         | %                  | pI  | kDa   | R                        |
|------|-----------------------|--------------------------------------------------------------------------------------------------------------------------------------------|--------------------|-----|-------|--------------------------|
| 1    | 2.5×10 <sup>-23</sup> | <a href="#">gi 56090293 ref NP_001007621.1 </a> pyruvate dehydrogenase (lipoamide) beta [Rattus norvegicus]                                | <a href="#">14</a> | 6.2 | 40.11 | <input type="checkbox"/> |
| 2    | 5.1×10 <sup>-8</sup>  | <a href="#">gi 285140 pir JX0228</a> proteasome endopeptidase complex (EC 3.4.25.1) delta chain - rat                                      | <a href="#">21</a> | 5.0 | 22.03 | <input type="checkbox"/> |
| 3    | 7.4×10 <sup>-8</sup>  | <a href="#">gi 50925763 gb AAH79187.1 </a> Similar to hypothetical protein MGC33309 [Rattus norvegicus]                                    | <a href="#">14</a> | 6.1 | 36.45 | <input type="checkbox"/> |
| 4    | 8.3×10 <sup>-8</sup>  | <a href="#">gi 56090624 ref NP_001007676.1 </a> C1q and tumor necrosis factor related protein 1 [Rattus norvegicus]                        | <a href="#">14</a> | 6.1 | 33.05 | <input type="checkbox"/> |
| 5    | 9.2×10 <sup>-8</sup>  | <a href="#">gi 47169486 tpe CAE48380.1 </a> TPA: proteasome subunit beta type 6-like [Rattus norvegicus]                                   | <a href="#">18</a> | 4.8 | 25.68 | <input type="checkbox"/> |
| 6    | 9.2×10 <sup>-8</sup>  | <a href="#">gi 54019419 ref NP_476440.2 </a> proteasome (prosome, macropain) subunit, beta type 6 [Rattus norvegicus]                      | <a href="#">18</a> | 4.8 | 25.67 | <input type="checkbox"/> |
| 7    | 1.3×10 <sup>-7</sup>  | <a href="#">gi 19705435 ref NP_599156.1 </a> alcohol dehydrogenase 7 (class IV), mu or sigma polypeptide [Rattus norvegicus]               | <a href="#">13</a> | 6.3 | 42.05 | <input type="checkbox"/> |
| 8    | 1.3×10 <sup>-7</sup>  | <a href="#">gi 5915678 sp P41682 ADH7_RAT</a> Alcohol dehydrogenase class 4 mu/sigma chain (Alcohol dehydrogenase class IV mu/sigma chain) | <a href="#">13</a> | 6.6 | 41.98 | <input type="checkbox"/> |
| 9    | 1.5×10 <sup>-7</sup>  | <a href="#">gi 25282455 ref NP_741987.1 </a> 3(2),5-bisphosphate nucleotidase [Rattus norvegicus]                                          | <a href="#">10</a> | 5.6 | 34.34 | <input type="checkbox"/> |
| 10   | 2.3×10 <sup>-7</sup>  | <a href="#">gi 13928958 ref NP_113878.1 </a> crystallin, beta B3 [Rattus norvegicus]                                                       | <a href="#">11</a> | 6.7 | 24.81 | <input type="checkbox"/> |
| 11   | 5.4×10 <sup>-7</sup>  | <a href="#">gi 299145 gb AAB26277.1 </a> integrin alpha v subunit [Rattus sp.]                                                             | <a href="#">18</a> | 5.2 | 28.46 | <input type="checkbox"/> |
| 12   | 6.1×10 <sup>-7</sup>  | <a href="#">gi 6689087 emb CAB65382.1 </a> MASP-2 protein [Rattus norvegicus]                                                              | <a href="#">5</a>  | 6.0 | 38.46 | <input type="checkbox"/> |
| 13   | 8.1×10 <sup>-7</sup>  | <a href="#">gi 57222310 ref NP_001009491.1 </a> 2'-5' oligoadenylate synthetase 1H [Rattus norvegicus]                                     | <a href="#">6</a>  | 5.4 | 44.57 | <input type="checkbox"/> |
| 14   | 9.0×10 <sup>-7</sup>  | <a href="#">gi 6689099 emb CAB65388.1 </a> MASP-2 protein [Rattus norvegicus]                                                              | <a href="#">4</a>  | 6.2 | 41.57 | <input type="checkbox"/> |
| 15   | 2.3×10 <sup>-5</sup>  | <a href="#">gi 9506501 ref NP_062232.1 </a> calponin 3, acidic [Rattus norvegicus]                                                         | <a href="#">8</a>  | 5.5 | 37.60 | <input type="checkbox"/> |
| 16   | 3.2×10 <sup>-5</sup>  | <a href="#">gi 55778376 gb AAH86383.1 </a> Eukaryotic translation initiation factor 3, subunit 4 (delta) [Rattus norvegicus]               | <a href="#">12</a> | 5.7 | 37.14 | <input type="checkbox"/> |
| 17   | 1.1×10 <sup>-4</sup>  | <a href="#">gi 14091738 ref NP_114447.1 </a> eukaryotic translation initiation factor 2B, subunit 2 beta [Rattus norvegicus]               | <a href="#">6</a>  | 5.8 | 39.63 | <input type="checkbox"/> |
| 18   | 1.1×10 <sup>-4</sup>  | <a href="#">gi 47683035 gb AAH70506.1 </a> Eukaryotic translation initiation factor 2B, subunit 2 beta [Rattus norvegicus]                 | <a href="#">6</a>  | 5.7 | 39.60 | <input type="checkbox"/> |

19 1.1×10<sup>-4</sup> [gi|2149254|gb|AAB58527.1](#) eukaryotic initiation factor eIF-2B beta subunit  
[Rattus norvegicus]

[6](#) 5.7 39.22

NOTE:

1. To search again using [unmatched masses](#), click the symbol

**Input Summary**

**Search id** B0E30CFE-0954-6105274D

**Sequences** 20076

**Date & Time** Tue Feb 06 20:48:45 2007 UTC (Search Time: 0.30 sec.)

**Sample ID** 20061228 richardson NIA set 1 spot 2403 CONSENSUS search 1

**Database** NCBIInr [..\databases\nr]

**Taxonomy** Rattus

**Mass Range** 20 - 45 kDa

**pI Range** 4.0 -7.0

**Digestion** Trypsin

**Missed Cuts** 0

**Modifications** +C2H3ON@C(Complete); +CH2N2@K(Complete);

**Charge State** MH+

**Masses (avg)**

**Tolerance (avg)** 1.00 ppm

**Masses (mon)** 663.324 718.358 791.411 861.512 902.473 919.455 944.554 991.516 1080.490  
1113.594 1219.619 1223.605 1290.620 1305.647 1313.639 1331.656 1346.651  
1431.715 1456.709 1486.710 1529.732 1542.755 1559.764 1568.755 1601.792  
1664.763 1666.776 1695.792 1699.864 1713.810 1730.839 1745.841 1747.856  
1757.865 1763.870 1779.866 1794.883 1801.882 1825.884 1827.870 1851.876  
1858.942 1893.892 1904.841 1908.907 1931.911 1953.928 1957.932 1962.908  
2001.928 2002.939 2023.940 2033.944 2035.963 2045.954 2046.955 2052.966  
2053.953 2062.993 2070.962 2098.993 2122.006 2167.052 2181.061 2209.094  
2298.157 2339.153 2341.191 2349.171 2350.170 2367.161 2368.155 2376.176  
2377.241 2381.163 2382.168 2392.230 2408.172 2435.237 2450.182 2460.158  
2497.189 2498.205 2503.189 2504.154 2514.194 2534.221 2535.194 2553.197  
2554.208 2559.208 2560.219 2593.196 2602.228 2603.217 2609.220 2610.214  
2633.188 2634.182 2650.220 2651.219 2668.259 2673.254 2674.217 2684.240  
2685.260 2691.226 2692.229 2723.271 2724.231 2733.257 2734.246 2746.247  
2747.232 2752.279 2753.298 2763.266 2764.234 2775.292 2776.283 2785.276  
2786.298 2801.287 2802.297 2820.302 2832.297 2833.274 2837.311 2838.308  
2850.289 2851.319 2868.365 2882.335 2885.359 2886.413 2892.326 2893.337  
2906.342 2914.334 2922.310 2948.344 2949.354 2959.371 2960.359 2964.348  
2965.340 2977.356 2978.340 2981.346 2982.382 2990.354 2991.366 3000.431  
3001.436 3011.360 3012.374 3020.375 3029.476 3047.539 3060.378 3061.402



3068.356 3070.353 3076.421 3077.420 3084.376 3085.366 3102.398 3103.407  
3112.374 3136.431 3172.445 3173.451 3183.448 3184.452 3196.434 3202.447  
3203.461 3208.450 3220.468 3228.461 3232.496 3233.479 3245.512 3262.540  
3273.488 3281.503 3292.535 3307.556 3308.559 3314.507 3326.535 3342.515  
3353.557 3354.537 3372.601 3373.536 3383.576 3384.527 3391.569 3392.587  
3398.556 3399.530 3406.547 3407.541 3418.547 3419.572 3434.592 3435.578  
3447.596 3448.582 3461.551 3476.591 3478.635 3479.549 3491.629 3492.610  
3499.588 3509.578 3519.602 3525.603 3532.619 3548.636 3552.614 3566.617  
3581.654 3599.633 3613.637 3622.622 3632.606 3650.655 3665.659 3675.658  
3683.646 3695.641 3710.689 3720.674 3727.687 3740.661 3755.744 3766.646  
3778.693 3783.707 3792.698 3801.719 3818.737 3835.702 3840.730 3851.822  
3861.694 3865.724 3874.753 3884.806 3895.707 3910.765 3920.703 3931.679  
3939.788 3948.815 3966.773 3979.763 3987.741 4004.890 4020.866 4036.786  
4046.821 4059.886 4080.876 4094.854 4103.912 4114.890 4127.890 4140.892  
4147.936 4155.906 4167.855 4190.991 4205.981 4229.838 4458.699 4473.779  
4676.501

**Tolerance (mon)** 9.00 ppm

**Number of Peptides** 282

# Laboratory of Mass Spectrometry and Gaseous Ion Chemistry

## PROWL

- **ProFound**
- **ProteinInfo**
- **PeptideMap**
- **PepFrag**
- **X! Tandem**
- **X! Hunter**
- **GPMDDB**
- **PROWL Home**
- **Chait Lab**



The Rockefeller University  
1230 York Avenue,  
New York, NY 10021  
(212) 327-8000



**National Center for  
Research Resources**

National Resource  
for the Mass Spectrometric  
Analysis of Biological  
Macromolecules

## ProFound



### Protein Candidates

| Rank | Expectation           | Protein Information and Sequence Analyse Tools (T)                                                                                                  | %  | pI  | kDa   | R |
|------|-----------------------|-----------------------------------------------------------------------------------------------------------------------------------------------------|----|-----|-------|---|
| +1   | 2.5×10 <sup>-13</sup> | gi 984553 gb AAC72249.1  G protein beta 1 subunit [Rattus norvegicus]                                                                               | 31 | 5.5 | 38.59 | ⊙ |
| -    | -                     | gi 51338711 sp P54311 GBB1_RAT Guanine nucleotide-binding protein G(I)/G(S)/G(T) subunit beta 1 (Transducin beta chain 1)                           | 31 | 5.6 | 38.58 | ⊙ |
| -    | -                     | gi 34868134 ref XP_235618.2  PREDICTED: similar to Ankyrin repeat and SOCS box protein 8 (ASB-8) [Rattus norvegicus]                                | 34 | 5.6 | 32.78 | ⊙ |
| -    | -                     | gi 24496500 gb AAN60073.1  RING finger protein MOMO [Rattus norvegicus]                                                                             | 23 | 4.7 | 44.83 | ⊙ |
| -    | -                     | gi 51854215 ref NP_001004075.1  ring finger protein 34 [Rattus norvegicus]                                                                          | 23 | 4.7 | 44.82 | ⊙ |
| -    | -                     | gi 13399443 pdb 1CX4 A Chain A, Crystal Structure Of A Deletion Mutant Of The Type Ii Beta Regulatory Subunit Of Camp-Dependent Protein Kinase      | 25 | 4.9 | 35.30 | ⊙ |
| -    | -                     | gi 11120724 ref NP_068537.1  sulfotransferase family 1D, member 1 [Rattus norvegicus]                                                               | 25 | 5.7 | 37.70 | ⊙ |
| -    | -                     | gi 8926237 gb AAF81755.1 AF269283_1 potassium channel auxiliary subunit KCHIP2a [Rattus norvegicus]                                                 | 31 | 4.9 | 31.85 | ⊙ |
| -    | -                     | gi 8926239 gb AAF81756.1 AF269284_1 potassium channel auxiliary subunit KCHIP2b [Rattus norvegicus]                                                 | 33 | 4.8 | 29.90 | ⊙ |
| -    | -                     | gi 27227451 gb AAN85424.1  MHC class Ib antigen [Rattus norvegicus]                                                                                 | 24 | 5.1 | 32.36 | ⊙ |
| -    | -                     | gi 50657372 ref NP_001002821.1  histocompatibility 2, T region locus 18 [Rattus norvegicus]                                                         | 19 | 5.3 | 40.56 | ⊙ |
| -    | -                     | gi 5542343 pdb 1QBQ A Chain A, Structure Of Rat Farnesyl Protein Transferase Complexed With A Cvim Peptide And Alpha-Hydroxyfarnesylphosphonic Acid | 22 | 5.1 | 40.44 | ⊙ |

|   |                                                                                                                                                                                                                                |    |     |       |  |
|---|--------------------------------------------------------------------------------------------------------------------------------------------------------------------------------------------------------------------------------|----|-----|-------|--|
| - | <a href="#">gi 34881740 ref XP_215225.2 </a> PREDICTED: similar to UCH37-interacting protein 1 isoform 1 [Rattus norvegicus]                                                                                                   | 13 | 4.8 | 42.39 |  |
| - | <a href="#">gi 31077142 ref NP_852030.1 </a> potassium channel interacting protein 4 [Rattus norvegicus]                                                                                                                       | 27 | 5.1 | 29.81 |  |
| - | <a href="#">gi 56585055 gb AAH87718.1 </a> Ring finger protein 135 [Rattus norvegicus]                                                                                                                                         | 14 | 5.5 | 47.79 |  |
| - | <a href="#">gi 40786447 ref NP_955410.1 </a> craniofacial development protein 1 [Rattus norvegicus]                                                                                                                            | 11 | 4.8 | 34.55 |  |
| - | <a href="#">gi 48843735 ref NP_001001717.1 </a> RT1 class Ib, locus M2 [Rattus norvegicus]                                                                                                                                     | 23 | 5.7 | 39.97 |  |
| - | <a href="#">gi 16758084 ref NP_445877.1 </a> copper chaperone for superoxide dismutase [Rattus norvegicus]                                                                                                                     | 20 | 5.8 | 29.89 |  |
| - | <a href="#">gi 34878802 ref XP_226031.2 </a> PREDICTED: similar to Transcription initiation factor TFIID subunit 7 (Transcription initiation factor TFIID 55 kDa subunit) (TAF(II)55) (TAFII-55) (TAFII55) [Rattus norvegicus] | 17 | 5.2 | 40.68 |  |
| - | <a href="#">gi 2499601 sp P70618 MK14_RAT</a> Mitogen-activated protein kinase 14 (Mitogen-activated protein kinase p38 alpha) (MAP kinase p38 alpha) (CRK1)                                                                   | 13 | 5.6 | 42.33 |  |
| - | <a href="#">gi 54035313 gb AAH83808.1 </a> Similar to Nuclear autoantigen Sp-100 (Speckled 100 kDa) (Nuclear dot-associated Sp100 protein) [Rattus norvegicus]                                                                 | 11 | 5.3 | 39.12 |  |
| - | <a href="#">gi 1916984 gb AAB51285.1 </a> p38 mitogen activated protein kinase [Rattus norvegicus]                                                                                                                             | 13 | 5.5 | 42.22 |  |
| - | <a href="#">gi 13194758 gb AAK15541.1 AF346293_1</a> p38 mitogen-activated protein kinase alpha1 [Rattus norvegicus]                                                                                                           | 13 | 5.6 | 42.34 |  |
| - | <a href="#">gi 27682039 ref XP_236922.1 </a> PREDICTED: similar to beta-tubulin cofactor C [Rattus norvegicus]                                                                                                                 | 19 | 5.1 | 39.20 |  |

## NOTE:

1. To search again using **unmatched masses**, click the symbol .
2. Highly similar protein sequences were given the same rank (click "+" to expand/contract).

## Input Summary

Search id B12B2FD8-0914-6145276A



**Sequences** 20092**Date & Time** Wed Jan 31 16:42:59 2007 UTC (Search Time: 0.41 sec.)**Sample ID****Database** NCBIInr [..\databases\Inr]**Taxonomy** Rattus**Mass Range** 28 - 48 kDa**pI Range** 4.7 -5.8**Digestion** Trypsin**Missed Cuts** 1**Modifications** +C2H3ON@C(Complete); +O@M(Partial); +CH2N2@K(Complete);**Charge State** MH+**Masses (avg)****Tolerance (avg)** 1.00 ppm

| <b>Masses (mon)</b> | 663.302  | 849.430  | 879.433  | 881.259  | 899.269  | 917.276  | 991.512 |
|---------------------|----------|----------|----------|----------|----------|----------|---------|
|                     | 1013.529 | 1177.574 | 1211.591 | 1223.608 | 1224.591 | 1226.587 |         |
|                     | 1265.616 | 1267.623 | 1330.600 | 1441.714 | 1529.735 | 1557.738 |         |
|                     | 1584.791 | 1630.752 | 1684.780 | 1757.849 | 1762.830 | 1765.832 |         |
|                     | 1789.833 | 1837.853 | 1853.863 | 1874.898 | 1887.875 | 1889.888 |         |
|                     | 1895.881 | 1904.893 | 1906.880 | 1908.888 | 1932.916 | 1951.909 |         |
|                     | 1953.919 | 1962.929 | 1984.931 | 2004.927 | 2022.008 | 2039.976 |         |
|                     | 2047.979 | 2048.955 | 2051.955 | 2052.956 | 2057.971 | 2059.002 |         |
|                     | 2071.003 | 2100.009 | 2123.990 | 2132.013 | 2150.015 | 2152.047 |         |
|                     | 2167.034 | 2183.075 | 2234.107 | 2241.129 | 2242.143 | 2298.147 |         |
|                     | 2306.147 | 2341.181 | 2363.132 | 2365.150 | 2376.138 | 2377.180 |         |
|                     | 2381.142 | 2382.184 | 2392.165 | 2396.151 | 2397.165 | 2435.194 |         |
|                     | 2447.148 | 2448.116 | 2458.181 | 2495.185 | 2507.210 | 2510.184 |         |
|                     | 2511.203 | 2537.198 | 2538.209 | 2553.221 | 2562.214 | 2563.210 |         |
|                     | 2572.231 | 2583.213 | 2584.228 | 2595.204 | 2596.209 | 2605.198 |         |
|                     | 2606.239 | 2611.237 | 2612.200 | 2622.240 | 2625.257 | 2626.172 |         |
|                     | 2639.265 | 2640.243 | 2647.217 | 2648.242 | 2668.265 | 2669.248 |         |
|                     | 2679.227 | 2680.240 | 2686.281 | 2687.240 | 2690.265 | 2691.256 |         |
|                     | 2697.309 | 2698.261 | 2706.349 | 2714.258 | 2715.267 | 2723.259 |         |
|                     | 2732.308 | 2733.300 | 2748.204 | 2749.334 | 2751.177 | 2752.249 |         |
|                     | 2765.304 | 2776.273 | 2777.295 | 2784.369 | 2785.312 | 2787.261 |         |
|                     | 2788.320 | 2795.252 | 2796.311 | 2804.208 | 2805.287 | 2816.268 |         |
|                     | 2817.295 | 2821.320 | 2832.254 | 2833.282 | 2839.278 | 2847.271 |         |



|          |          |          |          |          |          |
|----------|----------|----------|----------|----------|----------|
| 2848.354 | 2866.253 | 2887.353 | 2888.331 | 2897.398 | 2898.362 |
| 2906.361 | 2915.430 | 2922.362 | 2947.337 | 2948.361 | 2964.366 |
| 2965.391 | 2978.374 | 2979.281 | 2995.376 | 2999.392 | 3000.338 |
| 3003.378 | 3004.383 | 3012.451 | 3024.355 | 3029.407 | 3030.602 |
| 3047.343 | 3048.451 | 3058.412 | 3059.519 | 3065.352 | 3066.385 |
| 3077.454 | 3081.372 | 3083.384 | 3094.465 | 3095.500 | 3105.406 |
| 3114.442 | 3136.410 | 3145.422 | 3147.471 | 3179.443 | 3180.476 |
| 3196.455 | 3202.481 | 3213.498 | 3218.485 | 3227.456 | 3244.475 |
| 3245.483 | 3262.479 | 3274.422 | 3275.475 | 3284.402 | 3285.529 |
| 3292.457 | 3301.523 | 3306.537 | 3307.394 | 3314.463 | 3325.440 |
| 3326.572 | 3330.477 | 3338.536 | 3347.504 | 3348.534 | 3352.534 |
| 3353.508 | 3367.530 | 3368.493 | 3374.572 | 3375.601 | 3382.533 |
| 3383.566 | 3402.552 | 3403.517 | 3411.548 | 3415.552 | 3417.469 |
| 3427.505 | 3432.572 | 3433.441 | 3436.591 | 3438.517 | 3446.492 |
| 3447.592 | 3454.588 | 3462.497 | 3476.506 | 3486.611 | 3487.550 |
| 3499.505 | 3500.407 | 3509.640 | 3516.644 | 3527.590 | 3531.591 |
| 3537.645 | 3553.579 | 3563.693 | 3573.613 | 3579.648 | 3589.640 |
| 3609.587 | 3620.642 | 3631.649 | 3636.662 | 3648.640 | 3663.666 |
| 3673.648 | 3679.624 | 3692.715 | 3697.624 | 3713.636 | 3724.705 |
| 3744.765 | 3754.751 | 3761.662 | 3774.752 | 3792.712 | 3801.685 |
| 3818.702 | 3824.730 | 3840.735 | 3880.700 | 4100.892 | 4232.903 |
| 4264.932 | 4551.526 | 4800.682 |          |          |          |

**Tolerance** 12.00 ppm  
**(mon)**

**Number of** 268  
**Peptides**

PROWL

## ProFound

- [ProFound](#)
- [ProteinInfo](#)
- [PeptideMap](#)
- [PepFrag](#)
- [X! Tandem](#)
- [X! Hunter](#)
- [GPMDB](#)
- [PROWL Home](#)
- [Chait Lab](#)

The Rockefeller  
University

The Rockefeller University  
1230 York Avenue,  
New York, NY 10021  
(212) 327-8000

National Center of  
Research Resources

National Resource  
for the Mass Spectrometric  
Analysis of Biological  
Macromolecules

## Protein Candidates

| Rank | Expectation           | Protein Information and Sequence Analyse Tools (T)                                                                                                                                                                                               | %                  | pI  | kDa   | R                        |
|------|-----------------------|--------------------------------------------------------------------------------------------------------------------------------------------------------------------------------------------------------------------------------------------------|--------------------|-----|-------|--------------------------|
| +1   | 7.2×10 <sup>-30</sup> | <a href="#">gi 818029 emb CAA29121.1</a>   <a href="#">dismutase [Rattus norvegicus]</a>                                                                                                                                                         | <a href="#">38</a> | 5.9 | 16.11 | <input type="checkbox"/> |
|      | -                     | <a href="#">gi 203658 gb AAA40996.1</a>   <a href="#">Cu-Zn superoxide dismutase (EC 1.15.1.1)</a>                                                                                                                                               | <a href="#">38</a> | 5.9 | 16.24 | <input type="checkbox"/> |
|      | -                     | <a href="#">gi 1213217 emb CAA79925.1</a>   <a href="#">Cu/Zn superoxide dismutase [Rattus norvegicus]</a>                                                                                                                                       | <a href="#">37</a> | 5.7 | 16.51 | <input type="checkbox"/> |
|      | -                     | <a href="#">gi 8394328 ref NP_058746.1</a>   <a href="#">superoxide dismutase 1 [Rattus norvegicus]</a>                                                                                                                                          | <a href="#">37</a> | 5.9 | 16.44 | <input type="checkbox"/> |
|      | -                     | <a href="#">gi 27706818 ref XP_217572.1</a>   <a href="#">PREDICTED: similar to PDZ domain containing 11 [Rattus norvegicus]</a>                                                                                                                 | <a href="#">47</a> | 6.6 | 16.46 | <input type="checkbox"/> |
|      | -                     | <a href="#">gi 2780953 pdb 1AR0 A</a>   <a href="#">Chain A, Nuclear Transport Factor 2 (Ntf2) E42k Mutant</a>                                                                                                                                   | <a href="#">38</a> | 5.6 | 14.93 | <input type="checkbox"/> |
|      | -                     | <a href="#">gi 228123 prf 1717324N</a>   <a href="#">T cell receptor variable region:SUBUNIT=beta: ISOTYPE=9</a>                                                                                                                                 | <a href="#">49</a> | 6.7 | 13.28 | <input type="checkbox"/> |
|      | -                     | <a href="#">gi 2058677 gb AAB53321.1</a>   <a href="#">Kv4.3 [Rattus norvegicus]</a>                                                                                                                                                             | <a href="#">38</a> | 6.5 | 17.57 | <input type="checkbox"/> |
|      | -                     | <a href="#">gi 27662982 ref XP_235505.1</a>   <a href="#">PREDICTED: similar to NADH-ubiquinone oxidoreductase ESSS subunit, mitochondrial precursor (Complex I-ESSS) (CI-ESSS) (Neuronal protein 17.3) (p17.3) (Np17.3) [Rattus norvegicus]</a> | <a href="#">26</a> | 6.7 | 17.78 | <input type="checkbox"/> |
|      | -                     | <a href="#">gi 11560097 ref NP_071610.1</a>   <a href="#">baculoviral IAP repeat-containing 5 [Rattus norvegicus]</a>                                                                                                                            | <a href="#">29</a> | 5.9 | 17.56 | <input type="checkbox"/> |
|      | -                     | <a href="#">gi 4928278 gb AAD33515.1</a>   <a href="#">ephrin A-2 precursor [Rattus norvegicus]</a>                                                                                                                                              | <a href="#">17</a> | 6.1 | 12.12 | <input type="checkbox"/> |
|      | -                     | <a href="#">gi 675469 gb AAA87728.1</a>   <a href="#">synaptotagmin VIII</a>                                                                                                                                                                     | <a href="#">23</a> | 5.6 | 15.93 | <input type="checkbox"/> |
|      | -                     | <a href="#">gi 46391590 gb AAS90843.1</a>   <a href="#">OX2 receptor precursor variant 1 [Rattus norvegicus]</a>                                                                                                                                 | <a href="#">16</a> | 5.8 | 17.14 | <input type="checkbox"/> |
|      | -                     | <a href="#">gi 13516471 dbj BAB40316.1</a>   <a href="#">beta-actin FE-3 [Rattus norvegicus]</a>                                                                                                                                                 | <a href="#">21</a> | 5.6 | 15.43 | <input type="checkbox"/> |
|      | -                     | <a href="#">gi 34869362 ref XP_221411.2</a>   <a href="#">PREDICTED: similar to stefin A2 [Rattus norvegicus]</a>                                                                                                                                | <a href="#">7</a>  | 6.7 | 12.21 | <input type="checkbox"/> |
|      | -                     | <a href="#">gi 5419945 emb CAB46528.1</a>   <a href="#">endothelin-converting enzyme-1 b isoform [Rattus norvegicus]</a>                                                                                                                         | <a href="#">26</a> | 6.2 | 13.65 | <input type="checkbox"/> |
|      | -                     | <a href="#">gi 6114760 emb CAB59427.1</a>   <a href="#">phosphodiesterase I/nucleotide pyrophosphatase [Rattus norvegicus]</a>                                                                                                                   | <a href="#">26</a> | 5.5 | 17.83 | <input type="checkbox"/> |
|      | -                     | <a href="#">gi 30387884 gb AAP32273.1</a>   <a href="#">homeobox Otx1 [Rattus sp.]</a>                                                                                                                                                           | <a href="#">22</a> | 6.8 | 15.62 | <input type="checkbox"/> |

NOTE:

1. To search again using [unmatched masses](#), click the symbol .
2. Highly similar protein sequences were given the same rank (click "+" to expand/contract).

**Input Summary****Search id** AB7DD259-0EC4-5B9521DD**Sequences** 20092**Date & Time** Mon Jan 29 16:20:50 2007 UTC (Search Time: 0.27 sec.)**Sample ID** 20061228 richardson NIA set 1 spot 3105, 20070128, cleaned data search 3**Database** NCBIInr [..\databases\nr]**Taxonomy** Rattus**Mass Range** 12 - 18 kDa**pI Range** 5.5 -7.0**Digestion** Trypsin**Missed Cuts** 0**Modifications** +C2H3ON@C(Complete); +O@M(Partial); +CH2N2@K(Complete);**Charge State** MH+**Masses (avg)****Tolerance (avg)** 1.00 ppm

**Masses (mon)** 605.333 634.274 654.390 660.287 662.302 666.641 668.679 672.396 684.661  
719.381 724.767 725.771 753.800 768.381 802.263 804.274 824.497 832.305  
854.286 862.286 902.459 904.456 918.458 948.519 955.502 990.543 1005.537  
1027.546 1080.480 1091.528 1167.516 1174.568 1179.595 1211.574 1224.565  
1233.636 1243.552 1248.597 1262.604 1281.603 1322.657 1330.603 1367.753  
1380.699 1408.646 1529.735 1552.760 1666.788 1808.829 1825.828 1837.849  
1891.858 1904.846 1908.884 1917.881 1931.916 1949.904 1953.910 1964.908  
1986.901 2005.921 2006.927 2015.905 2016.925 2021.936 2025.928 2026.933  
2036.947 2037.942 2038.941 2042.953 2046.932 2047.957 2070.957 2098.965  
2124.012 2152.048 2183.079 2225.099 2241.116 2242.137 2298.144 2306.146  
2366.168 2367.103 2377.151 2378.141 2390.141 2397.156 2398.160 2416.118  
2417.143 2430.153 2431.091 2450.172 2455.196 2456.188 2458.158 2465.225  
2466.200 2479.184 2498.197 2506.181 2507.187 2512.205 2513.228 2518.166  
2519.170 2532.168 2533.193 2543.188 2544.202 2558.185 2559.200 2566.190  
2567.138 2591.198 2604.209 2622.208 2627.170 2628.194 2638.221 2639.227  
2648.215 2649.227 2668.263 2669.239 2679.264 2686.213 2687.212 2700.220  
2701.214 2708.262 2718.230 2719.246 2731.281 2732.254 2743.205 2744.200  
2764.299 2765.278 2776.302 2782.247 2784.274 2789.263 2790.251 2800.277  
2801.280 2806.291 2807.271 2819.289 2820.282 2834.290 2835.282 2844.275  
2845.280 2847.319 2848.298 2862.294 2863.318 2866.318 2893.349 2894.337  
2903.314 2914.365 2922.329 2947.336 2958.330 2960.344 2976.320 2977.352  
2995.372 2996.375 3001.367 3002.274 3020.336 3033.348 3034.368 3047.420  
3048.392 3060.392 3065.390 3066.363 3077.390 3083.380 3084.397 3095.444  
3105.425 3114.456 3138.461 3147.456 3148.473 3180.503 3181.469 3187.458



|          |          |          |          |          |          |          |          |
|----------|----------|----------|----------|----------|----------|----------|----------|
| 3199.494 | 3210.458 | 3220.483 | 3228.457 | 3232.498 | 3233.495 | 3244.487 | 3245.479 |
| 3260.486 | 3273.558 | 3274.484 | 3289.500 | 3291.701 | 3298.489 | 3307.656 | 3308.540 |
| 3316.489 | 3330.553 | 3337.634 | 3353.679 | 3355.686 | 3372.524 | 3373.540 | 3388.515 |
| 3389.531 | 3406.538 | 3407.561 | 3419.560 | 3420.542 | 3429.581 | 3430.533 | 3434.554 |
| 3435.531 | 3444.571 | 3445.577 | 3461.530 | 3463.568 | 3480.601 | 3482.569 | 3500.626 |
| 3511.576 | 3527.571 | 3536.618 | 3545.591 | 3550.609 | 3561.589 | 3566.612 | 3575.671 |
| 3583.609 | 3589.635 | 3602.569 | 3613.639 | 3631.623 | 3642.667 | 3653.676 | 3659.663 |
| 3676.684 | 3692.646 | 3706.694 | 3714.707 | 3724.703 | 3736.692 | 3743.689 | 3757.717 |
| 3774.758 | 3789.665 | 3806.684 | 3813.694 | 3820.787 | 3834.736 | 3843.763 | 3849.729 |
| 3860.673 | 3875.743 | 3890.743 | 3907.732 | 3915.735 | 3926.754 | 3931.896 | 3943.736 |
| 3954.776 | 3963.827 | 3971.753 | 3975.781 | 3984.811 | 3994.795 | 4011.821 | 4022.816 |
| 4036.846 | 4047.764 | 4053.811 | 4066.844 | 4085.838 | 4095.850 | 4109.951 | 4127.862 |
| 4160.783 | 4167.762 | 4173.563 | 4521.263 | 4613.309 | 4630.511 | 4646.664 |          |

**Tolerance (mon)** 38.00 ppm

**Number of Peptides** 298

# Laboratory of Mass Spectrometry and Gaseous Ion Chemistry

## PROWL

- **ProFound**
- **ProteinInfo**
- **PeptideMap**
- **PepFrag**
- **X! Tandem**
- **X! Hunter**
- **GPMDDB**
- **PROWL Home**
- **Chait Lab**



The Rockefeller University  
1230 York Avenue,  
New York, NY 10021  
(212) 327-8000



**National Center for  
Research Resources**

National Resource  
for the Mass Spectrometric  
Analysis of Biological  
Macromolecules

## ProFound



### Protein Candidates

| Rank | Expectation           | Protein Information and Sequence Analyse Tools (T)                                                             | %  | pI  | kDa   | R |
|------|-----------------------|----------------------------------------------------------------------------------------------------------------|----|-----|-------|---|
| 1    | 1.2×10 <sup>-16</sup> | gi 16758348 ref NP_446028.1  peroxiredoxin 6 [Rattus norvegicus]                                               | 29 | 5.6 | 25.61 | ⊙ |
| 2    | 3.3×10 <sup>-9</sup>  | gi 46359595 dbj BAD15354.1  interleukin-1 receptor accessory protein [Rattus norvegicus]                       | 34 | 6.4 | 25.13 | ⊙ |
| 3    | 4.5×10 <sup>-9</sup>  | gi 554507 gb AAA42117.1  stem cell factor                                                                      | 30 | 5.4 | 23.43 | ⊙ |
| +4   | 1.2×10 <sup>-7</sup>  | gi 38426813 gb AAR20448.1  wound inducible transcript 3.0 alpha [Rattus norvegicus]                            | 26 | 5.4 | 25.72 | ⊙ |
| -    | -                     | gi 56388776 gb AAH87696.1  Fgfr1op2 protein [Rattus norvegicus]                                                | 26 | 5.4 | 25.72 | ⊙ |
| -    | -                     | gi 6689097 emb CAB65387.1  MAp19 protein [Rattus norvegicus]                                                   | 30 | 5.8 | 20.85 | ⊙ |
| -    | -                     | gi 16758274 ref NP_445964.1  peroxiredoxin 4 [Rattus norvegicus]                                               | 18 | 6.2 | 31.89 | ⊙ |
| -    | -                     | gi 56605786 ref NP_001008356.1  hypothetical protein LOC312640 [Rattus norvegicus]                             | 26 | 6.3 | 30.63 | ⊙ |
| -    | -                     | gi 27465597 ref NP_775156.1  cytosolic resiniferatoxin-binding protein [Rattus norvegicus]                     | 34 | 5.9 | 27.51 | ⊙ |
| -    | -                     | gi 56090405 ref NP_001007660.1  hypothetical protein LOC300240 [Rattus norvegicus]                             | 20 | 5.8 | 25.91 | ⊙ |
| -    | -                     | gi 29293823 ref NP_808795.1  single-strand selective monofunctional uracil DNA glycosylase [Rattus norvegicus] | 18 | 6.4 | 31.17 | ⊙ |
| -    | -                     | gi 21245092 ref NP_640348.1  hypothetical protein LOC246120 [Rattus norvegicus]                                | 26 | 6.4 | 24.30 | ⊙ |
| -    | -                     | gi 13591872 ref NP_112248.1  adenylate kinase 2 isoform a [Rattus norvegicus]                                  | 22 | 6.3 | 27.49 | ⊙ |

|   |                                                                                                                                            |    |     |       |   |
|---|--------------------------------------------------------------------------------------------------------------------------------------------|----|-----|-------|---|
| - | gi 12585364 sp Q9Z0T0 TPMT_RAT Thiopurine S-methyltransferase (Thiopurine methyltransferase)                                               | 16 | 6.3 | 28.76 | 🔴 |
| - | gi 13400108 gb AAF43717.2  CD40 protein [Rattus norvegicus]                                                                                | 23 | 5.8 | 20.06 | 🔴 |
| - | gi 19923695 ref NP_113908.2  deiodinase, iodothyronine, type II [Rattus norvegicus]                                                        | 8  | 6.3 | 30.49 | 🔴 |
| - | gi 1518958 gb AAC52767.1  type II iodothyronine deiodinase [Rattus norvegicus]                                                             | 8  | 6.3 | 30.41 | 🔴 |
| - | gi 7436479 pir  T10816 thyroxine deiodinase (EC 3.8.1.4), type II - rat                                                                    | 8  | 6.3 | 30.41 | 🔴 |
| - | gi 92444 pir  C27115 K-kininogen, LMW precursor - rat (fragments)                                                                          | 17 | 6.3 | 33.24 | 🔴 |
| - | gi 230371 pdb 1TON  Chain , Tonin (E.C. Number Not Assigned)                                                                               | 14 | 5.8 | 26.88 | 🔴 |
| - | gi 33086596 gb AAP92610.1  Ab2-416 [Rattus norvegicus]                                                                                     | 24 | 6.0 | 21.01 | 🔴 |
| - | gi 112492 pir  S10088 beta-crystallin A3/A1 - rat (fragment)                                                                               | 21 | 6.4 | 21.67 | 🔴 |
| - | gi 223879 prf  1003216A tonin                                                                                                              | 15 | 6.1 | 25.02 | 🔴 |
| - | gi 33356831 pdb 1C7Z A Chain A, Regulatory Complex Of Fructose-2,6-Bisphosphatase                                                          | 19 | 5.8 | 22.85 | 🔴 |
| - | gi 2914269 pdb 1TIP A Chain A, The Bisphosphatase Domain Of The Bifunctional Rat Liver 6-Phosphofructo-2-KinaseFRUCTOSE-2,6-Bisphosphatase | 19 | 5.7 | 22.72 | 🔴 |
| - | gi 34853298 ref XP_341743.1  PREDICTED: similar to histidine triad protein 4 [Rattus norvegicus]                                           | 18 | 6.2 | 20.66 | 🔴 |
| - | gi 6688729 emb CAB65248.1  MASP-2 [Rattus norvegicus]                                                                                      | 22 | 6.0 | 21.79 | 🔴 |
| - | gi 6689093 emb CAB65385.1  MAp19 protein [Rattus norvegicus]                                                                               | 22 | 6.0 | 21.74 | 🔴 |
| - | gi 8394076 ref NP_058979.1  proteasome (prosome, macropain) subunit, alpha type 6 [Rattus norvegicus]                                      | 12 | 6.3 | 28.64 | 🔴 |
| - | gi 20385792 gb AAM21454.1 AF381279_1 parkin isoform [Rattus norvegicus]                                                                    | 13 | 5.4 | 23.66 | 🔴 |
| - | gi 19424188 ref NP_598217.1  CD79B antigen [Rattus norvegicus]                                                                             | 21 | 5.5 | 26.69 | 🔴 |

|   |                                                                                                       |    |     |       |   |
|---|-------------------------------------------------------------------------------------------------------|----|-----|-------|---|
| - | gi 58000409 ref NP_001009962.1  meteorin, glial cell differentiation regulator [Rattus norvegicus]    | 9  | 6.3 | 32.08 | ⊙ |
| - | gi 56605744 ref NP_001008334.1  hypothetical protein LOC302032 [Rattus norvegicus]                    | 15 | 6.4 | 24.64 | ⊙ |
| - | gi 3769634 gb AAC64592.1  olfactory receptor [Rattus norvegicus]                                      | 17 | 6.5 | 25.29 | ⊙ |
| - | gi 3114353 pdb 2KIN A Chain A, Kinesin (Monomeric) From Rattus Norvegicus                             | 14 | 5.9 | 28.08 | ⊙ |
| - | gi 3122309 sp P56536 KIF5C_RAT Kinesin heavy chain isoform 5C (Kinesin heavy chain neuron-specific 2) | 14 | 5.9 | 28.22 | ⊙ |
| - | gi 1929920 gb AAB51477.1  anti-idiotypic immunoglobulin M light chain [Rattus norvegicus]             | 20 | 5.6 | 26.19 | ⊙ |
| - | gi 18478866 gb AAL73348.1 AF343574_1 parkin transcript variant 6 [Rattus norvegicus]                  | 9  | 6.2 | 32.77 | ⊙ |
| - | gi 34873023 ref XP_342995.1  PREDICTED: hypothetical protein [Rattus norvegicus]                      | 24 | 5.5 | 20.65 | ⊙ |
| - | gi 47169594 tpe CAE51906.1  TPA: kallikrein 1 precursor [Rattus norvegicus]                           | 9  | 6.3 | 26.13 | ⊙ |
| - | gi 41386755 ref NP_958824.1  FGFR1 oncogene partner 2 [Rattus norvegicus]                             | 15 | 5.6 | 30.21 | ⊙ |
| - | gi 34856053 ref XP_341851.1  PREDICTED: similar to BCL2-like 12 (proline rich) [Rattus norvegicus]    | 16 | 5.7 | 27.75 | ⊙ |
| - | gi 38454298 ref NP_942076.1  hypothetical protein LOC362301 [Rattus norvegicus]                       | 19 | 5.9 | 21.01 | ⊙ |

## NOTE:

1. To search again using **unmatched masses**, click the symbol ⊙.
2. Highly similar protein sequences were given the same rank (click "+" to expand/contract).

**Input Summary**

Search id B469BB3A-05D8-64812AA6

Sequences 20092

Date &amp; Time Mon Jan 29 18:37:33 2007 UTC (Search Time: 0.34 sec.)

Sample ID



**Database** NCBI nr [..\databases\nr]

**Taxonomy** Rattus

**Mass Range** 20 - 34 kDa

**pI Range** 5.4 -6.5

**Digestion** Trypsin

**Missed Cuts** 0

**Modifications** +C2H3ON@C(Complete); +O@M(Partial); +HPO3@STY  
(Partial); +CH2N2@K(Complete);

**Charge State** MH+

**Masses (avg)**

**Tolerance (avg)** 1.00 ppm

**Masses (mon)** 612.630 615.625 626.653 628.619 654.392 668.687 682.714  
684.666 696.735 719.384 724.768 738.784 739.777 753.802  
754.805 766.813 767.801 768.797 769.823 795.817 797.854  
811.870 813.852 824.498 868.526 888.458 906.466 918.464  
920.465 948.524 955.503 976.545 990.546 999.529 1005.538  
1009.522 1020.498 1027.552 1058.497 1063.582 1070.554  
1076.532 1080.479 1087.543 1089.534 1091.538 1094.510  
1099.599 1173.652 1184.637 1191.667 1195.590 1199.621  
1217.646 1220.604 1223.612 1233.650 1244.590 1248.613  
1262.607 1265.630 1288.602 1291.620 1305.645 1312.628  
1322.661 1328.708 1346.642 1352.683 1363.643 1370.733  
1377.645 1388.665 1395.652 1432.714 1454.717 1456.716  
1481.702 1500.648 1504.720 1529.734 1542.760 1548.754  
1551.736 1557.746 1559.778 1568.753 1573.760 1575.732  
1584.774 1589.774 1602.807 1616.725 1622.760 1624.750  
1632.759 1639.719 1642.739 1653.753 1664.760 1666.772  
1683.778 1685.794 1695.790 1713.794 1720.807 1730.770  
1745.777 1757.855 1762.847 1779.864 1784.842 1786.873  
1828.925 1837.864 1850.899 1855.853 1894.909 1904.809  
1914.946 1928.893 1957.951 1962.912 1985.917 1992.926  
2000.948 2005.936 2015.847 2016.915 2021.939 2024.956  
2025.948 2036.981 2037.986 2039.954 2046.026 2046.940  
2050.995 2051.971 2070.922 2091.025 2099.000 2121.000  
2149.018 2180.073 2181.068 2209.089 2266.154 2339.170  
2341.198 2355.168 2363.177 2365.143 2374.223 2375.215  
2380.223 2381.190 2392.245 2416.253 2434.253 2435.246

|          |          |          |          |          |          |
|----------|----------|----------|----------|----------|----------|
| 2448.189 | 2458.162 | 2465.201 | 2466.203 | 2483.219 | 2485.211 |
| 2497.192 | 2498.136 | 2506.126 | 2513.165 | 2514.119 | 2530.176 |
| 2531.150 | 2540.184 | 2541.200 | 2554.285 | 2555.182 | 2574.169 |
| 2591.108 | 2599.172 | 2600.181 | 2604.307 | 2605.137 | 2610.246 |
| 2611.180 | 2622.219 | 2632.158 | 2633.233 | 2650.169 | 2651.221 |
| 2667.200 | 2668.198 | 2674.232 | 2676.179 | 2687.207 | 2689.175 |
| 2704.127 | 2705.230 | 2713.206 | 2714.199 | 2726.260 | 2727.250 |
| 2733.231 | 2734.240 | 2740.317 | 2742.331 | 2745.274 | 2746.166 |
| 2749.259 | 2750.274 | 2763.212 | 2765.237 | 2776.278 | 2785.281 |
| 2786.253 | 2790.261 | 2791.239 | 2801.303 | 2802.259 | 2807.290 |
| 2818.288 | 2819.256 | 2833.293 | 2834.242 | 2838.333 | 2839.292 |
| 2852.287 | 2853.285 | 2862.306 | 2863.327 | 2867.407 | 2868.406 |
| 2885.378 | 2886.229 | 2893.223 | 2894.438 | 2903.299 | 2914.335 |
| 2916.302 | 2947.312 | 2960.241 | 2963.266 | 2964.421 | 2977.349 |
| 2978.380 | 2990.378 | 2991.401 | 3001.312 | 3003.308 | 3010.334 |
| 3011.284 | 3020.394 | 3029.355 | 3030.526 | 3033.405 | 3034.351 |
| 3046.377 | 3047.306 | 3059.355 | 3061.335 | 3063.522 | 3064.407 |
| 3077.477 | 3078.386 | 3094.384 | 3105.422 | 3114.448 | 3122.392 |
| 3135.419 | 3136.423 | 3140.364 | 3141.451 | 3153.459 | 3171.487 |
| 3172.433 | 3191.467 | 3192.451 | 3210.458 | 3218.487 | 3231.509 |
| 3232.509 | 3244.505 | 3250.485 | 3260.504 | 3273.479 | 3281.481 |
| 3316.470 | 3324.478 | 3325.475 | 3339.484 | 3345.459 | 3346.427 |
| 3355.508 | 3357.508 | 3366.572 | 3367.586 | 3373.568 | 3375.514 |
| 3382.527 | 3383.513 | 3398.560 | 3403.603 | 3405.604 | 3421.612 |
| 3422.564 | 3432.494 | 3443.544 | 3448.568 | 3453.531 | 3455.454 |
| 3460.605 | 3468.545 | 3469.566 | 3472.532 | 3473.537 | 3480.815 |
| 3484.679 | 3485.542 | 3499.542 | 3506.579 | 3515.622 | 3522.605 |
| 3543.594 | 3549.604 | 3564.719 | 3567.556 | 3568.528 | 3587.641 |
| 3595.648 | 3604.712 | 3630.678 | 3665.665 | 3672.768 | 3693.691 |
| 3707.662 | 3711.525 | 3736.634 | 3744.697 | 3779.705 | 3817.679 |
| 3849.698 | 3863.732 | 3886.779 | 3892.727 | 4113.888 | 4124.926 |

**Tolerance** 16.00 ppm  
(mon)

**Number of** 347  
**Peptides**

# Laboratory of Mass Spectrometry and Gaseous Ion Chemistry

## PROWL

- [ProFound](#)
- [ProteinInfo](#)
- [PeptideMap](#)
- [PepFrag](#)
- [X! Tandem](#)
- [X! Hunter](#)
- [GPMDB](#)
- [PROWL Home](#)
- [Chait Lab](#)



The Rockefeller University  
1230 York Avenue,  
New York, NY 10021  
(212) 327-8000



**National Center for  
Research Resources**

National Resource  
for the Mass Spectrometric  
Analysis of Biological  
Macromolecules

## ProFound



### Protein Candidates

| Rank | Expectation           | Protein Information and Sequence Analyse Tools (T)                                                                                                                                                            | %  | pI  | kDa   | R |
|------|-----------------------|---------------------------------------------------------------------------------------------------------------------------------------------------------------------------------------------------------------|----|-----|-------|---|
| 1    | 1.5×10 <sup>-17</sup> | gi 27687455 ref XP_226755.1  PREDICTED: similar to cytoplasmic beta-actin [Rattus norvegicus]                                                                                                                 | 75 | 5.3 | 43.04 | ⊙ |
| +2   | 2.3×10 <sup>-15</sup> | gi 51316969 sp P62738 ACTA_RAT Actin, aortic smooth muscle (Alpha-actin-2)                                                                                                                                    | 64 | 5.2 | 43.19 | ⊙ |
|      | -                     | gi 6978441 ref NP_037025.1  actin, gamma 2 [Rattus norvegicus]                                                                                                                                                | 59 | 5.3 | 43.06 | ⊙ |
|      | -                     | gi 54036667 sp P68035 ACTC_RAT Actin, alpha cardiac muscle 1 (Alpha-cardiac actin)                                                                                                                            | 70 | 5.2 | 43.14 | ⊙ |
|      | -                     | gi 40786499 ref NP_955437.1  leucine carboxyl methyltransferase 1 [Rattus norvegicus]                                                                                                                         | 42 | 5.7 | 39.80 | ⊙ |
|      | -                     | gi 51036635 ref NP_036690.2  fructose-1,6- biphosphatase 1 [Rattus norvegicus]                                                                                                                                | 53 | 5.5 | 41.06 | ⊙ |
|      | -                     | gi 310111 gb AAA41131.1  fructose-biphosphatase                                                                                                                                                               | 53 | 5.5 | 41.03 | ⊙ |
|      | -                     | gi 21431625 sp  Q9ERB4_1 [Segment 1 of 2] Versican core protein precursor (Large fibroblast proteoglycan) (Chondroitin sulfate proteoglycan core protein 2) (PG-M) (Glial hyaluronate-binding protein) (GHAP) | 57 | 5.3 | 40.17 | ⊙ |
|      | -                     | gi 46237569 emb CAE83949.1  butyrophilin-like 2 [Rattus norvegicus]                                                                                                                                           | 37 | 5.0 | 51.58 | ⊙ |
|      | -                     | gi 40786517 ref NP_955442.1  WD repeat domain 12 [Rattus norvegicus]                                                                                                                                          | 46 | 5.6 | 49.36 | ⊙ |
|      | -                     | gi 1169826 sp P43424 GALT_RAT Galactose-1-phosphate uridylyltransferase (Gal-1-P uridylyltransferase) (UDP-glucose--hexose-1-phosphate uridylyltransferase)                                                   | 53 | 6.1 | 44.24 | ⊙ |

|   |                                |                                                                                                                 |    |     |       |   |
|---|--------------------------------|-----------------------------------------------------------------------------------------------------------------|----|-----|-------|---|
| - | gi 9296968 sp P82471 GNAO_RAT  | Guanine nucleotide-binding protein G(q) subunit alpha (Guanine nucleotide-binding protein alpha-q)              | 44 | 5.6 | 42.66 | 🔴 |
| - | gi 13591957 ref NP_112298.1    | guanine nucleotide binding protein, alpha q polypeptide [Rattus norvegicus]                                     | 43 | 5.5 | 43.34 | 🔴 |
| - | gi 51980596 gb AAH82087.1      | Eukaryotic translation initiation factor 3, subunit 6 [Rattus norvegicus]                                       | 49 | 5.7 | 53.70 | 🔴 |
| - | gi 1166528 gb AAC52417.1       | ksGC                                                                                                            | 44 | 6.2 | 49.54 | 🔴 |
| - | gi 42476312 ref NP_714955.2    | serine (or cysteine) proteinase inhibitor, clade B (ovalbumin), member 10 [Rattus norvegicus]                   | 49 | 6.2 | 46.59 | 🔴 |
| - | gi 1711600 sp P52845 ST1E2_RAT | Estrogen sulfotransferase, isoform 2 (EST-2) (Sulfotransferase, estrogen-preferring) (Estrone sulfotransferase) | 58 | 5.6 | 36.87 | 🔴 |
| - | gi 16758932 ref NP_446462.1    | neuraminidase 3 [Rattus norvegicus]                                                                             | 51 | 5.8 | 48.93 | 🔴 |
| - | gi 4433355 dbj BAA20565.1      | carboxyesterase E1 [Rattus norvegicus]                                                                          | 45 | 5.6 | 50.03 | 🔴 |
| - | gi 56090198 ref NP_001007719.1 | estrogen sulfotransferase [Rattus norvegicus]                                                                   | 51 | 5.8 | 36.86 | 🔴 |
| - | gi 13591874 ref NP_112249.1    | guanine nucleotide-binding protein, beta-1 subunit [Rattus norvegicus]                                          | 37 | 5.5 | 38.55 | 🔴 |
| - | gi 1711602 sp P49890 ST1E6_RAT | Estrogen sulfotransferase, isoform 6 (EST-6) (Sulfotransferase, estrogen-preferring) (Estrone sulfotransferase) | 58 | 5.6 | 36.76 | 🔴 |
| - | gi 55250760 gb AAH85868.1      | FK506 binding protein 5 [Rattus norvegicus]                                                                     | 36 | 5.9 | 53.70 | 🔴 |
| - | gi 57526868 ref NP_001009628.1 | T-kininogen II precursor [Rattus norvegicus]                                                                    | 44 | 5.9 | 50.20 | 🔴 |
| - | gi 50657372 ref NP_001002821.1 | histocompatibility 2, T region locus 18 [Rattus norvegicus]                                                     | 47 | 5.3 | 40.56 | 🔴 |
| - | gi 50925905 gb AAH79411.1      | Ubiquitin-like 1 (sentrin) activating enzyme E1A [Rattus norvegicus]                                            | 52 | 5.0 | 40.04 | 🔴 |
| - | gi 206150 gb AAA41856.1        | protein kinase type II regulatory subunit (, EC 2.7.1.37)                                                       | 41 | 5.0 | 43.31 | 🔴 |

|   |                                                                                                         |    |     |       |   |
|---|---------------------------------------------------------------------------------------------------------|----|-----|-------|---|
| - | gi 57012430 ref NP_001008820.1  keratin complex 1, acidic, gene 2 [Rattus norvegicus]                   | 53 | 4.9 | 52.73 | 🔴 |
| - | gi 12666521 emb CAC28066.1  protein phosphatase 1B2 53 kDa isoform [Rattus norvegicus]                  | 40 | 4.9 | 52.46 | 🔴 |
| - | gi 46237572 emb CAE83952.1  butyrophilin-like 5 [Rattus norvegicus]                                     | 46 | 5.4 | 46.42 | 🔴 |
| - | gi 50927329 gb AAH78939.1  Secernin 2 [Rattus norvegicus]                                               | 40 | 5.2 | 47.39 | 🔴 |
| - | gi 1330250 gb AAB00808.1  MHC class I antigen [Rattus norvegicus]                                       | 47 | 5.4 | 41.87 | 🔴 |
| - | gi 40786436 ref NP_955404.1  eukaryotic translation initiation factor 4A, isoform 1 [Rattus norvegicus] | 44 | 5.3 | 47.21 | 🔴 |
| - | gi 11120724 ref NP_068537.1  sulfotransferase family 1D, member 1 [Rattus norvegicus]                   | 53 | 5.7 | 37.70 | 🔴 |
| - | gi 57012446 ref NP_001008816.1  type I keratin KA22 [Rattus norvegicus]                                 | 47 | 5.1 | 51.29 | 🔴 |
| - | gi 16758340 ref NP_446020.1  phosphate cytidyltransferase 2, ethanolamine [Rattus norvegicus]           | 47 | 6.2 | 46.68 | 🔴 |
| - | gi 8393746 ref NP_058942.1  mitogen activated protein kinase kinase 5 isoform b [Rattus norvegicus]     | 50 | 5.9 | 50.32 | 🔴 |
| - | gi 8393652 ref NP_058992.1  potassium inwardly-rectifying channel J2 [Rattus norvegicus]                | 44 | 5.6 | 49.91 | 🔴 |
| - | gi 205308 gb AAA41570.1  alpha-1 major acute phase protein prepeptide                                   | 40 | 6.0 | 49.77 | 🔴 |
| - | gi 47477878 gb AAH70884.1  Pgcp protein [Rattus norvegicus]                                             | 33 | 6.0 | 53.13 | 🔴 |
| - | gi 13928880 ref NP_113828.1  plasma glutamate carboxypeptidase [Rattus norvegicus]                      | 33 | 6.1 | 53.06 | 🔴 |
| - | gi 7108713 gb AAF36518.1 AF131077_1 liver annexin-like protein [Rattus norvegicus]                      | 33 | 6.0 | 53.10 | 🔴 |
| - | gi 47477783 gb AAH70955.1  Ckb protein [Rattus norvegicus]                                              | 48 | 5.3 | 45.98 | 🔴 |
| - | gi 1346007 sp P02680 FIBG_RAT Fibrinogen gamma chain precursor                                          | 37 | 5.4 | 52.55 | 🔴 |
| - | gi 1183937 emb CAA29289.1  gamma-fibrinogen [Rattus norvegicus]                                         | 40 | 5.6 | 51.56 | 🔴 |

|   |                                                                                                                      |    |     |       |   |
|---|----------------------------------------------------------------------------------------------------------------------|----|-----|-------|---|
| - | gi 769859 gb AAA69915.1  lamina associated polypeptide 1C                                                            | 40 | 5.7 | 52.92 | 🔴 |
| - | gi 13591934 ref NP_112285.1  chitobiase, di-N-acetyl- [Rattus norvegicus]                                            | 43 | 5.3 | 42.91 | 🔴 |
| - | gi 2851391 sp P16391 HA12_RAT RT1 class I histocompatibility antigen, AA alpha chain precursor                       | 47 | 5.3 | 42.52 | 🔴 |
| - | gi 13928776 ref NP_113761.1  phosphorylase kinase, gamma 1 [Rattus norvegicus]                                       | 31 | 6.1 | 46.46 | 🔴 |
| - | gi 40786443 ref NP_955408.1  Sil1 protein [Rattus norvegicus]                                                        | 37 | 5.1 | 53.85 | 🔴 |
| - | gi 940831 emb CAA62021.1  Mature alpha chain of major histocompatibility complex class I antigen [Rattus norvegicus] | 31 | 5.4 | 39.67 | 🔴 |
| - | gi 47087085 ref NP_997710.1  type I keratin KA17 [Rattus norvegicus]                                                 | 37 | 5.0 | 49.32 | 🔴 |
| - | gi 1263200 gb AAC52551.1  MHC class I RT1.Ac heavy chain precursor                                                   | 29 | 5.5 | 41.85 | 🔴 |
| - | gi 57012370 ref NP_001008822.1  keratin 25A [Rattus norvegicus]                                                      | 39 | 5.0 | 50.55 | 🔴 |
| - | gi 56270274 gb AAH87595.1  Similar to RIKEN cDNA 2810428C21 [Rattus norvegicus]                                      | 35 | 6.1 | 40.22 | 🔴 |
| - | gi 40891590 gb AAR97521.1  zinc finger protein 183 [Rattus norvegicus]                                               | 35 | 5.9 | 40.16 | 🔴 |
| - | gi 205578 gb AAA41654.1  cardiac myosin heavy chain 5                                                                | 27 | 5.5 | 49.78 | 🔴 |
| - | gi 39645155 gb AAH63813.1  Gnn protein [Rattus norvegicus]                                                           | 34 | 6.3 | 48.18 | 🔴 |
| - | gi 2225995 emb CAA74333.1  MHC class I alpha chain [Rattus norvegicus]                                               | 45 | 5.2 | 39.79 | 🔴 |
| - | gi 55778623 gb AAH86600.1  Inositol polyphosphate-1-phosphatase [Rattus norvegicus]                                  | 28 | 5.0 | 44.79 | 🔴 |
| - | gi 204050 gb AAA41122.1  c-erbA-alpha-2 protein                                                                      | 40 | 5.7 | 42.82 | 🔴 |
| - | gi 18034777 ref NP_542143.1  apolipoprotein A-V [Rattus norvegicus]                                                  | 37 | 6.0 | 42.14 | 🔴 |
| - | gi 4103877 gb AAD01873.1  glial fibrillary acidic protein alpha [Rattus norvegicus]                                  | 33 | 5.4 | 50.84 | 🔴 |
| - | gi 8393431 ref NP_058705.1  glial fibrillary acidic protein [Rattus norvegicus]                                      | 33 | 5.4 | 50.82 | 🔴 |

|   |                                 |                                                                 |    |     |       |   |
|---|---------------------------------|-----------------------------------------------------------------|----|-----|-------|---|
| - | gi 40018556 ref NP_954517.1     | nin one binding protein [Rattus norvegicus]                     | 27 | 6.1 | 47.84 | 🔴 |
| - | gi 14916547 sp O35824 DNJA2_RAT | DnaJ homolog subfamily A member 2 (RDJ2)                        | 38 | 6.1 | 47.72 | 🔴 |
| - | gi 51259324 gb AAH78893.1       | Fibrinogen, gamma polypeptide [Rattus norvegicus]               | 36 | 5.8 | 51.56 | 🔴 |
| - | gi 34979829 gb AAQ83903.1       | flavoheomprotein b5/b5R variant [Rattus norvegicus]             | 30 | 6.0 | 51.42 | 🔴 |
| - | gi 27720673 ref XP_236398.1     | PREDICTED: similar to CG11584-PB [Rattus norvegicus]            | 29 | 6.0 | 48.15 | 🔴 |
| - | gi 56799412 ref NP_114468.2     | DnaJ (Hsp40) homolog, subfamily A, member 2 [Rattus norvegicus] | 37 | 6.1 | 47.70 | 🔴 |
| - | gi 1000514 emb CAA57986.1       | major histocompatibility complex class I [Rattus norvegicus]    | 47 | 5.3 | 41.65 | 🔴 |
| - | gi 25742579 ref NP_071792.1     | heterogeneous nuclear ribonucleoprotein F [Rattus norvegicus]   | 36 | 5.3 | 46.73 | 🔴 |
| - | gi 4930076 pdb 1PHZ A           | Chain A, Structure Of Phosphorylated Phenylalanine Hydroxylase  | 28 | 5.7 | 50.72 | 🔴 |
| - | gi 53733952 gb AAH83669.1       | Vacuolar ATPase subunit H [Rattus norvegicus]                   | 37 | 6.3 | 52.49 | 🔴 |
| - | gi 22324680 gb AAM95632.1       | FK506 binding protein 4 [Rattus norvegicus]                     | 33 | 5.7 | 47.34 | 🔴 |
| - | gi 50925541 gb AAH78934.1       | Protective protein for beta-galactosidase [Rattus norvegicus]   | 27 | 5.1 | 52.72 | 🔴 |
| - | gi 71830 pir  FGRTGB            | fibrinogen gamma-B chain precursor - rat                        | 28 | 5.6 | 52.46 | 🔴 |
| - | gi 5030428 gb AAD01874.2        | glial fibrillary acidic protein delta [Rattus norvegicus]       | 29 | 5.7 | 49.58 | 🔴 |
| - | gi 12711386 emb CAC28536.1      | Ajuba protein [Rattus norvegicus]                               | 29 | 6.0 | 42.40 | 🔴 |
| - | gi 2887302 emb CAA57631.1       | RT1.A(u) alpha chain [Rattus norvegicus]                        | 39 | 5.1 | 39.48 | 🔴 |
| - | gi 28461157 ref NP_786933.1     | crystallin, lambda 1 [Rattus norvegicus]                        | 26 | 5.9 | 36.52 | 🔴 |

|   |                                                                                                               |    |     |       |   |
|---|---------------------------------------------------------------------------------------------------------------|----|-----|-------|---|
| - | gi 1263202 gb AAC52552.1  MHC class I RT1.Au heavy chain precursor                                            | 37 | 5.3 | 41.68 | ⊙ |
| - | gi 31581536 ref NP_787037.2  sequestosome 1 isoform 1 [Rattus norvegicus]                                     | 35 | 5.1 | 49.29 | ⊙ |
| - | gi 50925859 gb AAH79304.1  Tektin 4 [Rattus norvegicus]                                                       | 21 | 5.8 | 53.81 | ⊙ |
| - | gi 3150056 gb AAC26487.1  MHC class Ib RT1.S3 [Rattus norvegicus]                                             | 39 | 5.7 | 40.71 | ⊙ |
| - | gi 223466 prf  0807284A myosin H                                                                              | 18 | 5.4 | 51.50 | ⊙ |
| - | gi 205576 gb AAA41653.1  cardiac myosin heavy chain 21/26                                                     | 18 | 5.4 | 51.65 | ⊙ |
| - | gi 5912596 emb CAB56216.1  A2b [Rattus norvegicus]                                                            | 27 | 5.6 | 39.49 | ⊙ |
| - | gi 25742677 ref NP_476463.1  proteasome 26S ATPase subunit 4 [Rattus norvegicus]                              | 21 | 5.1 | 48.72 | ⊙ |
| - | gi 5912590 emb CAB56213.1  A1k [Rattus norvegicus]                                                            | 22 | 5.6 | 39.69 | ⊙ |
| - | gi 57222292 ref NP_001009379.1  2'-5' oligoadenylate synthetase 1D [Rattus norvegicus]                        | 31 | 6.0 | 44.30 | ⊙ |
| - | gi 16923954 ref NP_476449.1  serine (or cysteine) proteinase inhibitor, clade B, member 5 [Rattus norvegicus] | 36 | 5.8 | 43.99 | ⊙ |

## NOTE:

1. To search again using **unmatched masses**, click the symbol ⊙.
2. Highly similar protein sequences were given the same rank (click "+" to expand/contract).

**Input Summary****Search id** A59F0287-14A0-55B91BDE**Sequences** 20092**Date & Time** Wed Jan 31 19:07:04 2007 UTC (Search Time: 0.55 sec.)**Sample ID****Database** NCBI nr [..\databases\nr]**Taxonomy** Rattus**Mass Range** 36 - 54 kDa**pI Range** 4.9 -6.3**Digestion** Trypsin**Missed Cuts** 1



**Modifications** +C2H3ON@C(Complete); +O@M(Partial); +HPO3@TY  
(Partial); +CH2N2@K(Complete);

**Charge State** MH+

**Masses (avg)**

**Tolerance (avg)** 1.00 ppm

**Masses (mon)** 663.345 780.372 832.317 918.466 991.513 1045.526 1064.524  
1091.542 1112.534 1177.580 1217.631 1220.603 1224.587  
1226.592 1233.626 1242.595 1258.599 1268.607 1291.615  
1313.613 1330.603 1372.660 1441.743 1482.694 1486.706  
1504.712 1529.726 1533.723 1543.734 1568.761 1572.744  
1584.773 1589.753 1600.756 1602.789 1616.722 1622.732  
1624.764 1630.760 1642.767 1653.738 1678.761 1685.790  
1688.799 1695.786 1713.802 1717.823 1721.794 1736.804  
1740.825 1743.818 1748.809 1757.861 1766.820 1780.857  
1786.836 1790.837 1837.835 1854.849 1871.872 1889.876  
1894.872 1904.865 1908.884 1932.891 1954.912 1962.903  
1987.920 2004.922 2005.924 2019.917 2020.944 2039.951  
2046.950 2047.951 2051.953 2052.942 2056.919 2057.959  
2072.986 2091.026 2096.994 2118.987 2124.007 2152.043  
2183.056 2209.092 2348.152 2349.143 2364.148 2365.164  
2375.145 2376.134 2381.160 2382.146 2397.150 2398.175  
2419.144 2420.152 2437.193 2438.169 2447.170 2448.159  
2458.164 2482.198 2483.194 2506.187 2507.186 2514.205  
2538.195 2550.180 2551.199 2556.192 2557.197 2564.199  
2565.196 2574.188 2577.208 2591.198 2605.197 2606.205  
2636.201 2637.198 2647.184 2649.228 2664.244 2665.241  
2673.229 2674.220 2678.235 2679.232 2684.244 2685.244  
2694.177 2699.240 2700.222 2713.247 2714.240 2718.242  
2719.236 2723.255 2724.270 2733.254 2734.244 2741.259  
2742.225 2749.288 2750.228 2761.219 2762.264 2766.266  
2768.290 2784.291 2785.368 2789.278 2790.263 2796.291  
2797.309 2805.281 2806.269 2817.295 2818.280 2822.295  
2823.210 2832.292 2833.233 2837.302 2849.289 2850.306  
2868.308 2882.316 2885.323 2886.330 2889.318 2890.305  
2896.332 2906.333 2914.354 2922.323 2950.232 2962.342  
2963.328 2969.363 2970.359 2977.361 2979.357 2995.362  
2997.361 3003.373 3004.345 3011.367 3012.372 3020.363  
3028.336 3029.316 3048.459 3051.390 3052.344 3065.408



|          |          |          |          |          |          |
|----------|----------|----------|----------|----------|----------|
| 3077.413 | 3085.357 | 3086.367 | 3093.496 | 3094.491 | 3111.462 |
| 3112.361 | 3136.424 | 3148.443 | 3149.434 | 3180.463 | 3181.478 |
| 3187.460 | 3198.475 | 3201.439 | 3213.473 | 3220.468 | 3230.500 |
| 3243.466 | 3244.453 | 3260.474 | 3277.488 | 3284.500 | 3285.453 |
| 3301.516 | 3306.469 | 3307.516 | 3316.498 | 3326.459 | 3337.477 |
| 3338.518 | 3345.491 | 3346.498 | 3355.472 | 3356.447 | 3367.513 |
| 3368.539 | 3381.504 | 3382.527 | 3389.429 | 3390.589 | 3402.434 |
| 3403.496 | 3410.467 | 3411.549 | 3417.531 | 3418.494 | 3423.464 |
| 3424.541 | 3431.534 | 3432.519 | 3443.471 | 3444.532 | 3450.517 |
| 3451.646 | 3459.542 | 3460.530 | 3469.570 | 3470.552 | 3484.485 |
| 3485.606 | 3492.575 | 3493.514 | 3513.540 | 3519.580 | 3526.636 |
| 3534.594 | 3545.604 | 3558.610 | 3572.648 | 3581.615 | 3592.550 |
| 3614.567 | 3618.567 | 3637.616 | 3646.632 | 3652.601 | 3665.648 |
| 3674.596 | 3679.606 | 3695.598 | 3708.697 | 3712.698 | 3725.674 |
| 3742.758 | 3756.744 | 3773.673 | 3788.676 | 3802.678 | 3808.744 |
| 3813.793 | 3819.684 | 3834.717 | 3843.670 | 3856.784 | 3862.745 |
| 3872.746 | 4115.848 | 4257.988 | 4288.157 |          |          |

**Tolerance** 36.00 ppm  
**(mon)**

**Number of** 299  
**Peptides**

PROWL

## ProFound

- [ProFound](#)
- [ProteinInfo](#)
- [PeptideMap](#)
- [PepFrag](#)
- [X! Tandem](#)
- [X! Hunter](#)
- [GPMDB](#)
- [PROWL Home](#)
- [Chait Lab](#)

The Rockefeller  
University

The Rockefeller University  
1230 York Avenue,  
New York, NY 10021  
(212) 327-8000

National Center of  
Research Resources

National Resource  
for the Mass Spectrometric  
Analysis of Biological  
Macromolecules

## Protein Candidates

| Rank | Expectation           | Protein Information and Sequence Analyse Tools (T)                                                                                                                                                        | %                  | pI  | kDa   | R                        |
|------|-----------------------|-----------------------------------------------------------------------------------------------------------------------------------------------------------------------------------------------------------|--------------------|-----|-------|--------------------------|
| 1    | 4.9×10 <sup>-29</sup> | <a href="#">gi 13592025 ref NP_112344.1 </a> protein geranylgeranyltransferase type I, beta subunit [Rattus norvegicus]                                                                                   | <a href="#">24</a> | 6.2 | 43.97 | <input type="checkbox"/> |
| 2    | 2.5×10 <sup>-18</sup> | <a href="#">gi 34860125 ref XP_345272.1 </a> PREDICTED: similar to Guanine nucleotide-binding protein G(t), alpha-2 subunit (Transducin alpha-2 chain) [Rattus norvegicus]                                | <a href="#">12</a> | 5.2 | 41.95 | <input type="checkbox"/> |
| +3   | 2.7×10 <sup>-12</sup> | <a href="#">gi 25742623 ref NP_113983.1 </a> UDP-glucose ceramide glucosyltransferase [Rattus norvegicus]                                                                                                 | <a href="#">6</a>  | 8.4 | 46.27 | <input type="checkbox"/> |
|      | -                     | <a href="#">gi 2924340 emb CAA11853.1 </a> ceramide glucosyltransferase [Rattus norvegicus]                                                                                                               | <a href="#">6</a>  | 8.7 | 46.21 | <input type="checkbox"/> |
| 4    | 3.7×10 <sup>-12</sup> | <a href="#">gi 34862688 ref XP_222370.2 </a> PREDICTED: similar to Neurogenic differentiation factor 4 (NeuroD4) (Atonal protein homolog 3) (Helix-loop-helix protein MATH-3) (MATH3) [Rattus norvegicus] | <a href="#">17</a> | 6.5 | 38.40 | <input type="checkbox"/> |
| 5    | 7.4×10 <sup>-11</sup> | <a href="#">gi 741805 prf 2008147C</a> protein RAKd                                                                                                                                                       | <a href="#">17</a> | 6.6 | 38.50 | <input type="checkbox"/> |
| 6    | 3.7×10 <sup>-10</sup> | <a href="#">gi 48927689 gb AAT47556.1 </a> UDP-GlcNAc:betaGal beta-1,3-N-acetylglucosaminyltransferase-like 1 [Rattus norvegicus]                                                                         | <a href="#">15</a> | 6.5 | 41.95 | <input type="checkbox"/> |
| 7    | 3.9×10 <sup>-10</sup> | <a href="#">gi 29789261 ref NP_112299.1 </a> guanine nucleotide-binding protein, beta 2 [Rattus norvegicus]                                                                                               | <a href="#">16</a> | 5.6 | 38.39 | <input type="checkbox"/> |
| 8    | 4.3×10 <sup>-10</sup> | <a href="#">gi 51980596 gb AAH82087.1 </a> Eukaryotic translation initiation factor 3, subunit 6 [Rattus norvegicus]                                                                                      | <a href="#">12</a> | 5.7 | 53.70 | <input type="checkbox"/> |
| 9    | 2.9×10 <sup>-9</sup>  | <a href="#">gi 16758354 ref NP_446034.1 </a> lipocalin 7 [Rattus norvegicus]                                                                                                                              | <a href="#">10</a> | 6.5 | 54.55 | <input type="checkbox"/> |
| 10   | 3.3×10 <sup>-9</sup>  | <a href="#">gi 20301976 ref NP_620195.1 </a> trans-golgi network protein 1 [Rattus norvegicus]                                                                                                            | <a href="#">11</a> | 5.0 | 39.88 | <input type="checkbox"/> |
| 11   | 4.0×10 <sup>-9</sup>  | <a href="#">gi 57351 emb CAA45884.1 </a> trans golgi network (TGN) specific integral membrane protein TGN38 [Rattus norvegicus]                                                                           | <a href="#">11</a> | 4.9 | 42.67 | <input type="checkbox"/> |
| 12   | 4.5×10 <sup>-9</sup>  | <a href="#">gi 8895958 gb AAF81193.1 AF237719_1</a> PDK2.1 pyruvate dehydrogenase kinase 2 subunit variant p45 [Rattus norvegicus]                                                                        | <a href="#">11</a> | 6.2 | 44.97 | <input type="checkbox"/> |
| 13   | 4.9×10 <sup>-9</sup>  | <a href="#">gi 9845234 ref NP_063970.1 </a> annexin A2 [Rattus norvegicus]                                                                                                                                | <a href="#">13</a> | 7.7 | 40.33 | <input type="checkbox"/> |
| 14   | 5.5×10 <sup>-9</sup>  | <a href="#">gi 9247201 gb AAB31934.2 </a> annexin II [Rattus sp.]                                                                                                                                         | <a href="#">13</a> | 8.3 | 40.42 | <input type="checkbox"/> |
| 15   | 7.0×10 <sup>-9</sup>  | <a href="#">gi 51948426 ref NP_001004227.1 </a> RNA terminal phosphate cyclase domain 1 [Rattus norvegicus]                                                                                               | <a href="#">13</a> | 7.9 | 40.63 | <input type="checkbox"/> |
| 16   | 8.9×10 <sup>-9</sup>  | <a href="#">gi 53759105 ref NP_001005265.1 </a> complement receptor related protein isoform 3 [Rattus norvegicus]                                                                                         | <a href="#">9</a>  | 5.6 | 57.36 | <input type="checkbox"/> |

|    |                      |                                                                                                                                      |                    |     |       |                          |
|----|----------------------|--------------------------------------------------------------------------------------------------------------------------------------|--------------------|-----|-------|--------------------------|
| 17 | 1.0×10 <sup>-8</sup> | <a href="#">gi 13540705 ref NP_110499.1 </a> pyruvate dehydrogenase kinase 2 subunit p45 (PDK2) [Rattus norvegicus]                  | <a href="#">11</a> | 6.1 | 47.16 | <input type="checkbox"/> |
| 18 | 1.1×10 <sup>-8</sup> | <a href="#">gi 392566 gb AAC04306.1 </a> LAR receptor-linked tyrosine phosphatase [Rattus norvegicus]                                | <a href="#">10</a> | 7.8 | 54.44 | <input type="checkbox"/> |
| 19 | 3.1×10 <sup>-8</sup> | <a href="#">gi 55249723 gb AAH85801.1 </a> Nucleosome assembly protein 1-like 4 [Rattus norvegicus]                                  | <a href="#">8</a>  | 4.6 | 45.56 | <input type="checkbox"/> |
| 20 | 4.9×10 <sup>-8</sup> | <a href="#">gi 57012884 sp Q66H86 OLFL1_RAT</a> Olfactomedin-like protein 1 precursor                                                | <a href="#">10</a> | 7.2 | 46.95 | <input type="checkbox"/> |
| 21 | 6.5×10 <sup>-8</sup> | <a href="#">gi 17105358 ref NP_476553.1 </a> ubiquitin-activating enzyme E1C [Rattus norvegicus]                                     | <a href="#">6</a>  | 5.3 | 53.31 | <input type="checkbox"/> |
| 22 | 7.2×10 <sup>-8</sup> | <a href="#">gi 11559958 ref NP_071527.1 </a> synaptotagmin 6 [Rattus norvegicus]                                                     | <a href="#">9</a>  | 8.6 | 59.37 | <input type="checkbox"/> |
| 23 | 1.2×10 <sup>-7</sup> | <a href="#">gi 9506451 ref NP_062166.1 </a> carbonic anhydrase 5 [Rattus norvegicus]                                                 | <a href="#">18</a> | 9.0 | 35.33 | <input type="checkbox"/> |
| 24 | 1.3×10 <sup>-7</sup> | <a href="#">gi 53733416 gb AAH83587.1 </a> Yip1 domain family, member 2 [Rattus norvegicus]                                          | <a href="#">15</a> | 5.5 | 35.26 | <input type="checkbox"/> |
| 25 | 1.6×10 <sup>-7</sup> | <a href="#">gi 6978697 ref NP_036665.1 </a> carboxypeptidase B1 [Rattus norvegicus]                                                  | <a href="#">11</a> | 5.4 | 48.78 | <input type="checkbox"/> |
| 26 | 2.9×10 <sup>-7</sup> | <a href="#">gi 51980318 gb AAH81983.1 </a> Von Willebrand factor A domain containing 1 [Rattus norvegicus]                           | <a href="#">10</a> | 6.2 | 45.18 | <input type="checkbox"/> |
| 27 | 4.4×10 <sup>-7</sup> | <a href="#">gi 226865 prf 1609196A</a> synaptic vesicle protein                                                                      | <a href="#">7</a>  | 8.6 | 50.25 | <input type="checkbox"/> |
| 28 | 4.4×10 <sup>-7</sup> | <a href="#">gi 92791 pir S09595</a> synaptotagmin P65 - rat                                                                          | <a href="#">7</a>  | 8.7 | 50.15 | <input type="checkbox"/> |
| 29 | 4.4×10 <sup>-7</sup> | <a href="#">gi 57643 emb CAA36981.1 </a> cellular protein [Rattus rattus]                                                            | <a href="#">7</a>  | 8.7 | 50.13 | <input type="checkbox"/> |
| 30 | 4.4×10 <sup>-7</sup> | <a href="#">gi 39918764 emb CAE85101.1 </a> synaptotagmin 1 [Rattus rattus]                                                          | <a href="#">7</a>  | 8.8 | 50.08 | <input type="checkbox"/> |
| 31 | 5.0×10 <sup>-7</sup> | <a href="#">gi 13242310 ref NP_077373.1 </a> abl-interactor 1 [Rattus norvegicus]                                                    | <a href="#">3</a>  | 6.6 | 52.64 | <input type="checkbox"/> |
| 32 | 5.6×10 <sup>-7</sup> | <a href="#">gi 34864886 ref XP_235164.2 </a> PREDICTED: similar to fibroblast growth factor receptor substrate 2 [Rattus norvegicus] | <a href="#">10</a> | 5.8 | 58.13 | <input type="checkbox"/> |
| 33 | 5.1×10 <sup>-6</sup> | <a href="#">gi 47577425 ref NP_001000293.1 </a> olfactory receptor Olr459 [Rattus norvegicus]                                        | <a href="#">17</a> | 8.8 | 36.02 | <input type="checkbox"/> |
| 34 | 5.9×10 <sup>-6</sup> | <a href="#">gi 27465609 ref NP_775162.1 </a> guanine nucleotide binding protein, alpha transducing 3 [Rattus norvegicus]             | <a href="#">6</a>  | 5.6 | 42.05 | <input type="checkbox"/> |
| 35 | 3.4×10 <sup>-5</sup> | <a href="#">gi 129094 sp P23272 OLFI9_RAT</a> Olfactory receptor-like protein I9                                                     | <a href="#">14</a> | 8.6 | 36.43 | <input type="checkbox"/> |
| 36 | 3.4×10 <sup>-5</sup> | <a href="#">gi 47575917 ref NP_001000723.1 </a> olfactory receptor Olr1470 [Rattus norvegicus]                                       | <a href="#">14</a> | 8.6 | 36.39 | <input type="checkbox"/> |
| 37 | 3.8×10 <sup>-5</sup> | <a href="#">gi 34881317 ref XP_228523.2 </a> PREDICTED: similar to CG30497-PA, isoform A [Rattus norvegicus]                         | <a href="#">6</a>  | 7.8 | 46.26 | <input type="checkbox"/> |
| 38 | 2.9×10 <sup>-4</sup> | <a href="#">gi 9910234 ref NP_064481.1 </a> interferon-induced protein with tetratricopeptide repeats 1 [Rattus norvegicus]          | <a href="#">9</a>  | 5.9 | 55.20 | <input type="checkbox"/> |
| 39 | 4.6×10 <sup>-4</sup> | <a href="#">gi 7767180 pdb 1QFC A</a> Chain A, Structure Of Rat Purple Acid Phosphatase                                              | <a href="#">9</a>  | 9.0 | 35.05 | <input type="checkbox"/> |
| 40 | 4.6×10 <sup>-4</sup> | <a href="#">gi 9506369 ref NP_062017.1 </a> acid phosphatase 5 [Rattus norvegicus]                                                   | <a href="#">9</a>  | 8.9 | 37.48 | <input type="checkbox"/> |
| 41 | 0.84                 | <a href="#">gi 47576531 ref NP_001000092.1 </a> olfactory receptor Olr1630 [Rattus norvegicus]                                       | <a href="#">13</a> | 8.6 | 37.22 | <input type="checkbox"/> |

NOTE:

1. To search again using [unmatched masses](#), click the symbol .
2. Highly similar protein sequences were given the same rank (click "+" to expand/contract).

### Input Summary

**Search id** A91C6655-1124-59351F7D

**Sequences** 20092

**Date & Time** Tue Jan 30 18:03:50 2007 UTC (Search Time: 0.30 sec.)

**Sample ID** 20061228 richardson NIA set 1 spot 3625, 20070130, cleaned data search 2

**Database** NCBIInr [..\databases\nr]

**Taxonomy** Rattus

**Mass Range** 30 - 60 kDa

**pI Range** 4.5 -9.0

**Digestion** Trypsin

**Missed Cuts** 0

**Modifications** +C2H3ON@C(Complete); +HPO3@Y(Partial); +CH2N2@K(Complete);

**Charge State** MH+

**Masses (avg)**

**Tolerance (avg)** 1.00 ppm

**Masses (mon)** 664.343 750.677 841.882 899.271 902.473 917.280 938.478 991.513 1046.511  
 1091.550 1211.578 1220.596 1248.607 1291.617 1322.673 1330.621 1375.679  
 1428.743 1584.787 1602.789 1837.833 1891.897 1894.888 1905.880 1908.888  
 1913.891 1948.899 1954.926 1964.915 1982.931 2004.897 2005.923 2020.931  
 2021.933 2039.966 2045.978 2053.971 2054.955 2072.993 2096.971 2124.002  
 2132.018 2149.024 2183.076 2209.094 2225.106 2241.133 2242.141 2276.146  
 2298.155 2306.130 2366.159 2367.124 2375.151 2376.146 2379.168 2380.167  
 2390.154 2397.152 2398.160 2435.211 2450.174 2458.146 2460.164 2482.184  
 2483.200 2495.190 2506.176 2507.137 2532.156 2534.148 2540.191 2541.204  
 2549.177 2554.204 2555.181 2561.174 2562.186 2566.234 2574.180 2591.195  
 2593.188 2603.202 2604.212 2634.186 2635.208 2650.213 2651.226 2664.195  
 2668.217 2673.229 2674.224 2678.217 2679.210 2688.217 2692.219 2693.249  
 2705.229 2717.248 2718.232 2721.232 2722.212 2730.257 2731.233 2748.206  
 2749.267 2764.260 2765.267 2768.268 2769.272 2776.257 2777.265 2784.272  
 2786.265 2788.284 2789.258 2793.279 2794.281 2801.281 2802.271 2806.281  
 2816.261 2817.295 2833.275 2834.283 2838.301 2839.292 2847.273 2848.302  
 2868.314 2882.338 2890.318 2891.323 2896.332 2897.346 2904.324 2914.382  
 2922.319 2936.298 2944.325 2945.324 2958.334 2959.329 2962.298 2963.324  
 2977.347 2978.334 2986.371 2987.330 2995.378 3003.370 3004.337 3011.369  
 3012.347 3018.388 3029.607 3030.466 3047.383 3048.445 3060.378 3061.374  
 3064.395 3065.413 3076.423 3105.397 3112.419 3136.423 3147.407 3148.435  
 3180.467 3181.470 3187.454 3196.419 3210.457 3228.441 3262.469 3276.467  
 3277.477 3281.476 3294.498 3314.484 3329.496 3342.494 3356.507 3357.512  
 3367.557 3368.497 3373.520 3374.527 3382.549 3383.505 3390.507 3391.528



|          |          |          |          |          |          |          |          |
|----------|----------|----------|----------|----------|----------|----------|----------|
| 3400.542 | 3401.541 | 3409.522 | 3417.486 | 3418.524 | 3423.510 | 3424.501 | 3429.496 |
| 3430.446 | 3435.532 | 3436.505 | 3445.625 | 3446.548 | 3454.536 | 3460.623 | 3461.491 |
| 3465.561 | 3466.529 | 3472.717 | 3473.565 | 3484.505 | 3485.511 | 3499.564 | 3509.571 |
| 3518.573 | 3525.604 | 3530.597 | 3545.543 | 3556.582 | 3563.595 | 3576.659 | 3586.601 |
| 3593.605 | 3605.672 | 3614.626 | 3620.572 | 3630.618 | 3638.651 | 3649.657 | 3663.663 |
| 3678.627 | 3684.616 | 3704.608 | 3708.648 | 3712.621 | 3726.685 | 3739.618 | 3744.648 |
| 3751.691 | 3758.734 | 3762.670 | 3771.675 | 3783.694 | 3790.693 | 3810.701 | 3822.622 |
| 3839.689 | 4009.826 | 4281.030 | 4517.788 | 4731.618 |          |          |          |

**Tolerance (mon)** 8.00 ppm

**Number of Peptides** 254

PROWL

## ProFound

- [ProFound](#)
- [ProteinInfo](#)
- [PeptideMap](#)
- [PepFrag](#)
- [X! Tandem](#)
- [X! Hunter](#)
- [GPMDB](#)
- [PROWL Home](#)
- [Chait Lab](#)

The Rockefeller  
University

The Rockefeller University  
1230 York Avenue,  
New York, NY 10021  
(212) 327-8000

National Center of  
Research Resources

National Resource  
for the Mass Spectrometric  
Analysis of Biological  
Macromolecules

## Protein Candidates

| Rank | Expectation           | Protein Information and Sequence Analyse Tools (T)                                                                                                                                 | %                  | pI  | kDa   | R                        |
|------|-----------------------|------------------------------------------------------------------------------------------------------------------------------------------------------------------------------------|--------------------|-----|-------|--------------------------|
| +1   | 9.9×10 <sup>-12</sup> | <a href="#">gi 396270 emb CAA52328.1</a> heat shock protein 70 [Rattus norvegicus]                                                                                                 | <a href="#">54</a> | 5.5 | 72.29 | <input type="checkbox"/> |
|      | -                     | <a href="#">gi 407164 emb CAA53140.1</a> heat shock protein 70 [Rattus norvegicus]                                                                                                 | <a href="#">49</a> | 5.5 | 72.16 | <input type="checkbox"/> |
|      | -                     | <a href="#">gi 47059179 ref NP_997669.1</a> heat shock 70kD protein 1B [Rattus norvegicus]                                                                                         | <a href="#">46</a> | 5.6 | 72.43 | <input type="checkbox"/> |
|      | -                     | <a href="#">gi 14010867 ref NP_114177.1</a> heat shock 70kD protein 1A [Rattus norvegicus]                                                                                         | <a href="#">41</a> | 5.5 | 72.41 | <input type="checkbox"/> |
| 2    | 5.5×10 <sup>-9</sup>  | <a href="#">gi 6980978 ref NP_036868.1</a> glycerol-3-phosphate dehydrogenase 2 [Rattus norvegicus]                                                                                | <a href="#">49</a> | 6.2 | 83.22 | <input type="checkbox"/> |
| +3   | 2.8×10 <sup>-8</sup>  | <a href="#">gi 28849961 ref NP_579843.2</a> calpain 8 [Rattus norvegicus]                                                                                                          | <a href="#">39</a> | 5.5 | 82.22 | <input type="checkbox"/> |
|      | -                     | <a href="#">gi 495222 dbj BAA03369.1</a> calpain [Rattus norvegicus]                                                                                                               | <a href="#">39</a> | 5.5 | 82.26 | <input type="checkbox"/> |
| +4   | 1.6×10 <sup>-7</sup>  | <a href="#">gi 47087121 ref NP_997711.1</a> heat shock 70kD protein 1-like [Rattus norvegicus]                                                                                     | <a href="#">44</a> | 5.9 | 73.12 | <input type="checkbox"/> |
|      | -                     | <a href="#">gi 450934 emb CAA54424.1</a> heat shock protein 70 [Rattus norvegicus]                                                                                                 | <a href="#">44</a> | 5.9 | 73.12 | <input type="checkbox"/> |
| +5   | 8.4×10 <sup>-7</sup>  | <a href="#">gi 205233 gb AAA41540.1</a> lysophospholipase precursor                                                                                                                | <a href="#">25</a> | 5.3 | 68.96 | <input type="checkbox"/> |
|      | -                     | <a href="#">gi 203458 gb AAB46376.1</a> cholesterol esterase                                                                                                                       | <a href="#">26</a> | 5.3 | 69.01 | <input type="checkbox"/> |
|      | -                     | <a href="#">gi 8393096 ref NP_058693.1</a> carboxyl ester lipase [Rattus norvegicus]                                                                                               | <a href="#">26</a> | 5.3 | 68.89 | <input type="checkbox"/> |
|      | -                     | <a href="#">gi 311386 emb CAA80460.1</a> sterol esterase [Rattus norvegicus]                                                                                                       | <a href="#">26</a> | 5.4 | 66.81 | <input type="checkbox"/> |
| 6    | 7.7×10 <sup>-6</sup>  | <a href="#">gi 34859658 ref XP_235782.2</a> PREDICTED: similar to Kelch repeat and BTB domain-containing protein 3 (BTB and kelch domain-containing protein 3) [Rattus norvegicus] | <a href="#">36</a> | 5.6 | 72.42 | <input type="checkbox"/> |
| 7    | 9.8×10 <sup>-6</sup>  | <a href="#">gi 51858601 gb AAH81803.1</a> Hspa2 protein [Rattus norvegicus]                                                                                                        | <a href="#">36</a> | 5.5 | 72.10 | <input type="checkbox"/> |
| +8   | 3.7×10 <sup>-5</sup>  | <a href="#">gi 55716045 gb AAH85704.1</a> Pde4b protein [Rattus norvegicus]                                                                                                        | <a href="#">29</a> | 5.8 | 84.10 | <input type="checkbox"/> |
|      | -                     | <a href="#">gi 19923680 ref NP_058727.2</a> phosphodiesterase 4B [Rattus norvegicus]                                                                                               | <a href="#">28</a> | 5.4 | 84.38 | <input type="checkbox"/> |
| 9    | 2.0×10 <sup>-4</sup>  | <a href="#">gi 8394033 ref NP_058738.1</a> protein phosphatase 3, catalytic subunit, beta isoform [Rattus norvegicus]                                                              | <a href="#">37</a> | 5.6 | 60.71 | <input type="checkbox"/> |
| 10   | 3.8×10 <sup>-4</sup>  | <a href="#">gi 50925932 gb AAH79463.1</a> Hbs1-like (S. cerevisiae) [Rattus norvegicus]                                                                                            | <a href="#">41</a> | 6.2 | 77.57 | <input type="checkbox"/> |
| 11   | 1.2×10 <sup>-3</sup>  | <a href="#">gi 38304005 gb AAH62079.1</a> Signal transducer and activator of transcription 1 [Rattus norvegicus]                                                                   | <a href="#">24</a> | 5.8 | 85.99 | <input type="checkbox"/> |
| 12   | 3.6×10 <sup>-3</sup>  | <a href="#">gi 21666559 gb AAM73758.1 AF398465_1</a> TUC-4b [Rattus norvegicus]                                                                                                    | <a href="#">30</a> | 6.0 | 75.98 | <input type="checkbox"/> |
| +13  | 4.0×10 <sup>-3</sup>  | <a href="#">gi 21630291 ref NP_037211.1</a> asparagine synthetase [Rattus norvegicus]                                                                                              | <a href="#">34</a> | 6.0 | 66.39 | <input type="checkbox"/> |

|     |                      |                                             |                                                                              |                    |     |       |                          |
|-----|----------------------|---------------------------------------------|------------------------------------------------------------------------------|--------------------|-----|-------|--------------------------|
|     | -                    | <a href="#">gi 51859420 gb AAH81719.1</a>   | Asns protein [Rattus norvegicus]                                             | <a href="#">34</a> | 6.0 | 66.35 | <input type="checkbox"/> |
| +14 | 5.7×10 <sup>-3</sup> | <a href="#">gi 13994159 ref NP_077070.1</a> | annexin A6 [Rattus norvegicus]                                               | <a href="#">34</a> | 5.4 | 78.45 | <input type="checkbox"/> |
|     | -                    | <a href="#">gi 48734834 gb AAH72523.1</a>   | Anxa6 protein [Rattus norvegicus]                                            | <a href="#">31</a> | 5.4 | 78.45 | <input type="checkbox"/> |
| 15  | 0.052                | <a href="#">gi 13786172 ref NP_112628.1</a> | calcium/calmodulin-dependent protein kinase 2 beta [Rattus norvegicus]       | <a href="#">32</a> | 5.6 | 66.57 | <input type="checkbox"/> |
| 16  | 0.054                | <a href="#">gi 21426765 ref NP_653346.1</a> | G-protein signalling modulator 1 (AGS3-like, C. elegans) [Rattus norvegicus] | <a href="#">34</a> | 5.8 | 73.61 | <input type="checkbox"/> |
| +17 | 0.068                | <a href="#">gi 50927301 gb AAH78728.1</a>   | Spat7 protein [Rattus norvegicus]                                            | <a href="#">37</a> | 5.7 | 57.33 | <input type="checkbox"/> |
|     | -                    | <a href="#">gi 20302020 ref NP_620217.1</a> | spermatogenesis-associated protein 7 [Rattus norvegicus]                     | <a href="#">33</a> | 5.8 | 61.96 | <input type="checkbox"/> |
| 18  | 0.11                 | <a href="#">gi 50927611 gb AAH78812.1</a>   | Ica1 protein [Rattus norvegicus]                                             | <a href="#">38</a> | 5.6 | 57.10 | <input type="checkbox"/> |
|     | -                    | <a href="#">gi 37361834 gb AAQ91030.1</a>   | LRRGT00074 [Rattus norvegicus]                                               | <a href="#">21</a> | 6.0 | 81.65 | <input type="checkbox"/> |

## NOTE:

1. To search again using [unmatched masses](#), click the symbol .
2. Highly similar protein sequences were given the same rank (click "+" to expand/contract).

**Input Summary****Search id** B03F4AD9-09F8-606126A9**Sequences** 20076**Date & Time** Tue Feb 06 16:22:07 2007 UTC (Search Time: 0.50 sec.)**Sample ID** 20061228 richardson NIA set 1 spot 3709 CONSENSUS search 1**Database** NCBIInr [..\databases\nr]**Taxonomy** Rattus**Mass Range** 54 - 86 kDa**pI Range** 5.3 -6.2**Digestion** Trypsin**Missed Cuts** 1**Modifications** +C2H3ON@C(Complete); +O@M(Partial); +HPO3@STY(Partial); +CH2N2@K(Complete);**Charge State** MH+**Masses (avg)****Tolerance (avg)** 1.00 ppm



**Masses (mon)** 664.338 712.267 768.354 781.839 817.419 832.316 841.478 849.456 902.474  
938.476 977.464 1039.610 1046.506 1063.512 1090.616 1109.551 1178.576  
1195.592 1205.630 1210.586 1247.612 1265.634 1268.619 1283.703 1291.631  
1298.680 1314.607 1329.644 1334.651 1347.702 1406.708 1414.689 1438.698  
1457.699 1479.792 1511.757 1531.808 1559.773 1567.739 1575.746 1607.735  
1663.834 1725.830 1740.824 1779.865 1827.862 1845.875 1880.057 1917.839  
1922.930 1975.906 1994.969 2083.005 2090.040 2107.059 2108.059 2151.051  
2152.057 2241.133 2242.144 2276.140 2306.129 2356.173 2367.117 2368.099  
2374.154 2375.167 2380.176 2381.173 2391.166 2392.186 2399.163 2423.176  
2424.188 2434.260 2445.203 2482.212 2499.205 2500.218 2516.171 2525.204  
2542.207 2556.168 2557.178 2573.173 2574.172 2592.172 2701.233 2744.241  
2745.241 2748.247 2749.246 2764.242 2765.260 2777.290 2778.268 2784.267  
2785.268 2787.271 2788.273 2800.274 2801.250 2806.279 2807.270 2820.296  
2821.294 2832.279 2839.318 2848.301 2849.295 2868.376 2880.320 2881.321  
2885.313 2886.330 2895.329 2904.326 2905.349 2915.387 2922.346 2923.333  
2932.330 2933.351 2944.336 2945.318 2950.342 2951.361 2963.354 2976.356  
2977.368 2994.352 2995.395 3001.385 3003.365 3012.414 3019.387 3020.371  
3028.381 3029.504 3033.383 3034.369 3047.472 3048.530 3060.405 3061.419  
3065.408 3066.391 3076.444 3077.434 3094.468 3105.424 3106.445 3123.491  
3136.429 3137.445 3147.461 3148.480 3155.476 3185.470 3186.471 3191.462  
3192.464 3209.463 3210.467 3232.516 3233.495 3265.471 3266.483 3273.486  
3274.491 3281.489 3282.513 3293.535 3294.517 3299.493 3300.499 3314.503  
3324.516 3325.527 3340.524 3341.500 3356.568 3357.550 3369.601 3372.543  
3373.542 3383.550 3384.529 3395.520 3396.538 3402.529 3403.531 3406.520  
3407.525 3419.575 3420.557 3439.519 3440.529 3449.606 3450.522 3455.529  
3456.541 3464.592 3465.571 3483.611 3493.519 3494.594 3501.604 3513.603  
3523.611 3527.597 3544.632 3548.623 3564.602 3581.608 3614.626 3635.665  
3651.639 3664.651 3671.704 3679.665 3694.668 3711.684 3728.688 3735.711  
3752.702 3759.710 3763.724 3778.713 3794.715 3811.708 3842.747 4021.827  
4035.809 4055.791 4072.858 4083.857 4098.717 4102.840 4112.820 4121.868  
4127.917 4135.836 4150.729 4166.920 4182.800 4197.904 4223.799 4530.786

**Tolerance (mon)** 22.00 ppm

**Number of Peptides** 249

# Laboratory of Mass Spectrometry and Gaseous Ion Chemistry

## PROWL

- ▶ **ProFound**
- ▶ **ProteinInfo**
- ▶ **PeptideMap**
- ▶ **PepFrag**
- ▶ **X! Tandem**
- ▶ **X! Hunter**
- ▶ **GPMDDB**
- ▶ **PROWL Home**
- ▶ **Chait Lab**



The Rockefeller University  
1230 York Avenue,  
New York, NY 10021  
(212) 327-8000



**National Center for  
Research Resources**

National Resource  
for the Mass Spectrometric  
Analysis of Biological  
Macromolecules

## ProFound



### Protein Candidates

| Rank | Expectation          | Protein Information and Sequence Analyse Tools (T)                                                              | %  | pI  | kDa   | R |
|------|----------------------|-----------------------------------------------------------------------------------------------------------------|----|-----|-------|---|
| 1    | 1.3×10 <sup>-9</sup> | gi 47169594 tpe CAE51906.1  TPA: kallikrein 1 precursor [Rattus norvegicus]                                     | 45 | 6.3 | 26.13 | ⊙ |
| 2    | 4.9×10 <sup>-8</sup> | gi 56676344 ref NP_001008561.1  ribonuclease A family, member 9 [Rattus norvegicus]                             | 55 | 5.8 | 22.33 | ⊙ |
| 3    | 5.1×10 <sup>-8</sup> | gi 34864887 ref XP_216890.2  PREDICTED: similar to YEATS domain containing 4 [Rattus norvegicus]                | 30 | 6.6 | 26.92 | ⊙ |
| 4    | 1.2×10 <sup>-7</sup> | gi 13399990 pdb 111A D Chain D, Crystal Structure Of The Neonatal Fc Receptor Complexed With A Heterodimeric Fc | 46 | 6.3 | 27.75 | ⊙ |
| 5    | 5.8×10 <sup>-7</sup> | gi 51247925 pdb 1VG1 A Chain A, Gdp-Bound Rab7                                                                  | 61 | 6.4 | 21.84 | ⊙ |
| 6    | 2.5×10 <sup>-6</sup> | gi 34855419 ref XP_214868.2  PREDICTED: similar to intersex-like [Rattus norvegicus]                            | 42 | 5.9 | 21.81 | ⊙ |
| 7    | 1.4×10 <sup>-5</sup> | gi 206260 gb AAB60703.1  plasma membrane calcium ATPase                                                         | 66 | 5.8 | 22.23 | ⊙ |
| 8    | 2.0×10 <sup>-5</sup> | gi 56090403 ref NP_001007747.1  hypothetical protein LOC362483 [Rattus norvegicus]                              | 45 | 6.4 | 25.12 | ⊙ |
| 9    | 5.0×10 <sup>-5</sup> | gi 8394513 ref NP_058884.1  UNC-119 homolog [Rattus norvegicus]                                                 | 50 | 5.8 | 27.71 | ⊙ |
| 10   | 5.2×10 <sup>-5</sup> | gi 57012386 ref NP_001008856.1  RT1 class Ib, locus H2-Q-like, grc region [Rattus norvegicus]                   | 54 | 6.0 | 21.62 | ⊙ |
| +11  | 6.8×10 <sup>-5</sup> | gi 3891675 pdb 1BD7 A Chain A, Circularly Permuted Bb2 - Crystallin                                             | 51 | 6.3 | 20.73 | ⊙ |
|      | -                    | gi 6978713 ref NP_037069.1  crystallin, beta B2 [Rattus norvegicus]                                             | 28 | 6.5 | 24.02 | ⊙ |
| 12   | 1.6×10 <sup>-4</sup> | gi 27707658 ref XP_228699.1  PREDICTED: similar to type 1 protein phosphatase inhibitor [Rattus norvegicus]     | 52 | 5.9 | 21.34 | ⊙ |
| 13   | 2.2×10 <sup>-4</sup> | gi 45433570 ref NP_112352.2  RAB1, member RAS oncogene family [Rattus norvegicus]                               | 44 | 5.9 | 23.60 | ⊙ |

|     |                      |                                |                                                                                               |    |     |       |   |
|-----|----------------------|--------------------------------|-----------------------------------------------------------------------------------------------|----|-----|-------|---|
| 14  | $5.8 \times 10^{-4}$ | gi 33086596 gb AAP92610.1      | Ab2-416 [Rattus norvegicus]                                                                   | 39 | 6.0 | 21.01 | 🔴 |
| 15  | $1.0 \times 10^{-3}$ | gi 841426 gb AAA91987.1        | tenascin-X                                                                                    | 29 | 6.4 | 23.92 | 🔴 |
| 16  | $1.3 \times 10^{-3}$ | gi 50925930 gb AAH79461.1      | Similar to RIKEN cDNA<br>C430008C19 [Rattus norvegicus]                                       | 31 | 6.5 | 24.78 | 🔴 |
| 17  | $3.1 \times 10^{-3}$ | gi 3769634 gb AAC64592.1       | olfactory receptor [Rattus<br>norvegicus]                                                     | 30 | 6.5 | 25.29 | 🔴 |
| 18  | $3.8 \times 10^{-3}$ | gi 631893 pir  JC2337          | T-cell receptor alpha-chain - rat                                                             | 49 | 6.0 | 25.07 | 🔴 |
| +19 | $6.9 \times 10^{-3}$ | gi 349083 gb AAA41479.1        | calcium/calmodulin-dependent<br>protein kinase II delta subunit                               | 42 | 6.0 | 21.68 | 🔴 |
| -   | -                    | gi 2769554 emb CAA53395.1      | calcium/calmodulin dependent<br>protein kinase II subtype delta 2 [Rattus norvegicus]         | 40 | 6.2 | 22.47 | 🔴 |
| -   | -                    | gi 2769555 emb CAA54412.1      | calcium/calmodulin dependent<br>protein kinase II subtype delta 3 [Rattus norvegicus]         | 28 | 6.0 | 20.07 | 🔴 |
| -   | -                    | gi 20302018 ref NP_620216.1    | prolactin-like protein K [Rattus<br>norvegicus]                                               | 31 | 6.5 | 26.88 | 🔴 |
| -   | -                    | gi 16758778 ref NP_446355.1    | ephrin A5 [Rattus norvegicus]                                                                 | 43 | 6.1 | 27.16 | 🔴 |
| -   | -                    | gi 122240 sp P06341 HB2A_RAT   | RT1 class II histocompatibility<br>antigen, A beta chain                                      | 37 | 6.3 | 27.37 | 🔴 |
| -   | -                    | gi 9506377 ref NP_062093.1     | amino-terminal enhancer of split<br>[Rattus norvegicus]                                       | 17 | 5.9 | 22.62 | 🔴 |
| -   | -                    | gi 48040531 ref NP_001001517.1 | zinc finger protein 313<br>[Rattus norvegicus]                                                | 46 | 6.4 | 27.11 | 🔴 |
| -   | -                    | gi 257209 gb AAB23588.1        | low M(r) phosphotyrosine protein<br>phosphatase isoenzyme AcP1 [rats, liver, Peptide, 159 aa] | 47 | 6.1 | 19.15 | 🔴 |
| -   | -                    | gi 13928956 ref NP_113877.1    | crystallin, beta A4 [Rattus<br>norvegicus]                                                    | 32 | 5.9 | 22.76 | 🔴 |
| -   | -                    | gi 34933260 ref XP_237746.2    | PREDICTED: similar to acid<br>phosphatase 1, soluble [Rattus norvegicus]                      | 35 | 6.1 | 22.84 | 🔴 |
| -   | -                    | gi 8307696 dbj BAA96485.1      | alpha-2u globulin [Rattus<br>norvegicus]                                                      | 38 | 5.9 | 21.83 | 🔴 |
| -   | -                    | gi 51316135 sp Q8K586 RANT_RAT | GTP-binding nuclear<br>protein Ran, testis-specific isoform                                   | 30 | 6.6 | 25.40 | 🔴 |

|   |                                                                                                                                  |    |     |       |  |
|---|----------------------------------------------------------------------------------------------------------------------------------|----|-----|-------|--|
| - | <a href="#">gi 10863989 ref NP_067085.1</a> acid phosphatase 1, soluble<br>[Rattus norvegicus]                                   | 34 | 6.1 | 19.05 |  |
| - | <a href="#">gi 2769556 emb CAA54413.1</a> calcium /calmodulin dependent<br>protein kinase II subtype delta 4 [Rattus norvegicus] | 32 | 6.1 | 23.83 |  |

## NOTE:

1. To search again using **unmatched masses**, click the symbol .
2. Highly similar protein sequences were given the same rank (click "+" to expand/contract).

**Input Summary****Search id** A25055E4-17F0-5269188E**Sequences** 20092**Date & Time** Tue Jan 30 18:44:59 2007 UTC (Search Time: 0.39 sec.)**Sample ID****Database** NCBI nr [..\databases\nr]**Taxonomy** Rattus**Mass Range** 19 - 28 kDa**pI Range** 5.8 -6.7**Digestion** Trypsin**Missed Cuts** 1**Modifications** +C2H3ON@C(Complete); +O@M(Partial); +HPO3@STY  
(Partial); +CH2N2@K(Complete);**Charge State** MH+**Masses (avg)****Tolerance (avg)** 1.00 ppm

**Masses (mon)** 876.046 991.515 1046.501 1064.515 1091.535 1177.576  
 1194.581 1220.597 1223.599 1226.586 1233.626 1268.608  
 1291.617 1333.656 1475.751 1504.714 1529.731 1601.767  
 1617.731 1623.738 1631.742 1678.763 1685.790 1695.788  
 1713.800 1721.794 1743.780 1757.859 1765.815 1784.818  
 1836.830 1838.855 1853.845 1873.870 1893.865 1904.849  
 1916.857 1928.889 1932.859 1948.884 1953.902 1962.907  
 1984.902 2002.890 2003.880 2021.923 2029.894 2030.915  
 2038.945 2051.950 2052.936 2057.940 2058.964 2070.950  
 2096.966 2118.979 2121.987 2135.000 2150.008 2167.054

|          |          |          |          |          |          |
|----------|----------|----------|----------|----------|----------|
| 2173.029 | 2180.024 | 2181.034 | 2209.099 | 2251.104 | 2297.122 |
| 2314.103 | 2315.081 | 2362.094 | 2367.099 | 2368.107 | 2380.132 |
| 2381.122 | 2390.098 | 2398.132 | 2399.125 | 2408.115 | 2418.116 |
| 2419.129 | 2425.142 | 2435.122 | 2439.140 | 2440.129 | 2458.139 |
| 2466.141 | 2467.155 | 2482.141 | 2483.163 | 2493.141 | 2494.133 |
| 2503.139 | 2504.130 | 2514.140 | 2520.153 | 2521.149 | 2532.137 |
| 2533.142 | 2554.161 | 2555.139 | 2560.171 | 2561.145 | 2574.149 |
| 2593.174 | 2603.187 | 2604.180 | 2632.173 | 2633.153 | 2637.173 |
| 2638.195 | 2649.181 | 2650.188 | 2663.193 | 2664.189 | 2667.192 |
| 2668.193 | 2673.208 | 2674.203 | 2682.199 | 2683.208 | 2693.211 |
| 2694.190 | 2701.210 | 2702.204 | 2708.194 | 2726.199 | 2727.393 |
| 2735.242 | 2736.212 | 2743.241 | 2744.230 | 2752.275 | 2768.400 |
| 2769.430 | 2784.272 | 2787.274 | 2788.244 | 2804.247 | 2805.270 |
| 2822.284 | 2823.316 | 2830.249 | 2831.270 | 2837.264 | 2838.258 |
| 2848.281 | 2849.283 | 2864.402 | 2865.387 | 2892.385 | 2893.294 |
| 2904.304 | 2914.290 | 2935.318 | 2936.311 | 2963.318 | 2964.312 |
| 2977.303 | 2978.339 | 2989.335 | 2990.313 | 3004.344 | 3005.336 |
| 3020.339 | 3027.323 | 3028.321 | 3035.341 | 3036.339 | 3041.323 |
| 3042.304 | 3052.346 | 3053.318 | 3059.352 | 3060.372 | 3075.351 |
| 3076.357 | 3082.343 | 3084.336 | 3105.388 | 3112.347 | 3139.408 |
| 3140.400 | 3171.443 | 3172.445 | 3187.444 | 3210.448 | 3220.458 |
| 3228.427 | 3265.438 | 3266.441 | 3273.438 | 3280.453 | 3281.457 |
| 3316.476 | 3323.441 | 3324.440 | 3327.460 | 3328.496 | 3342.475 |
| 3343.466 | 3354.486 | 3355.438 | 3372.457 | 3373.435 | 3383.510 |
| 3384.479 | 3387.439 | 3388.462 | 3397.468 | 3398.498 | 3405.500 |
| 3406.510 | 3410.475 | 3421.455 | 3425.465 | 3426.475 | 3437.433 |
| 3442.494 | 3443.521 | 3451.483 | 3452.495 | 3464.499 | 3465.510 |
| 3470.487 | 3471.535 | 3476.511 | 3478.515 | 3482.485 | 3483.545 |
| 3486.513 | 3487.487 | 3499.555 | 3500.523 | 3508.564 | 3518.550 |
| 3522.545 | 3527.531 | 3533.528 | 3540.553 | 3548.528 | 3556.477 |
| 3562.511 | 3570.583 | 3577.565 | 3586.488 | 3597.629 | 3607.559 |
| 3614.589 | 3625.576 | 3634.535 | 3666.580 | 3678.522 | 3693.560 |
| 3700.601 | 3709.628 | 3728.603 | 3739.568 | 3746.635 | 3760.658 |
| 3772.608 | 3780.613 | 3786.653 | 3801.646 | 3811.745 | 3824.658 |
| 3835.724 | 3845.618 | 3850.691 | 3855.717 | 3865.578 | 3873.706 |
| 4089.676 |          |          |          |          |          |

**Tolerance** 28.00 ppm  
**(mon)**

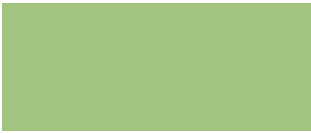

**Number of 271  
Peptides**

# Laboratory of Mass Spectrometry and Gaseous Ion Chemistry

## PROWL

- **ProFound**
- **ProteinInfo**
- **PeptideMap**
- **PepFrag**
- **X! Tandem**
- **X! Hunter**
- **GPMDDB**
- **PROWL Home**
- **Chait Lab**

## ProFound



### Protein Candidates

| Rank | Expectation          | Protein Information and Sequence Analyse Tools (T)                                                                                                                                    | %  | pI  | kDa   | R |
|------|----------------------|---------------------------------------------------------------------------------------------------------------------------------------------------------------------------------------|----|-----|-------|---|
| 1    | 3.9×10 <sup>-6</sup> | gi 51948384 ref NP_001004206.1  proliferation-associated 2G4, 38kDa [Rattus norvegicus]                                                                                               | 47 | 6.4 | 45.75 | ⊙ |
| +2   | 4.2×10 <sup>-4</sup> | gi 203652 gb AAA40995.1  CTP:phosphocholine cytidyltransferase                                                                                                                        | 37 | 6.6 | 43.38 | ⊙ |
|      | -                    | gi 430717 gb AAB60489.1  CTP:phosphocholine cytidyltransferase                                                                                                                        | 33 | 6.6 | 43.25 | ⊙ |
|      | -                    | gi 53828922 ref NP_511177.2  phosphate cytidyltransferase 1, choline, alpha isoform [Rattus norvegicus]                                                                               | 27 | 6.6 | 43.28 | ⊙ |
| 3    | 8.8×10 <sup>-4</sup> | gi 205308 gb AAA41570.1  alpha-1 major acute phase protein prepeptide                                                                                                                 | 40 | 6.0 | 49.77 | ⊙ |
| 4    | 2.9×10 <sup>-3</sup> | gi 34880908 ref XP_222911.2  PREDICTED: similar to Pre-B-cell leukemia transcription factor 1 (Homeobox protein PBX1) [Rattus norvegicus]                                             | 40 | 6.5 | 47.78 | ⊙ |
| 5    | 0.011                | gi 51948372 ref NP_001004200.1  COP9 constitutive photomorphogenic homolog subunit 3 [Rattus norvegicus]                                                                              | 29 | 6.2 | 49.59 | ⊙ |
|      | -                    | gi 18376837 ref NP_543166.1  arsenic (+3 oxidation state) methyltransferase [Rattus norvegicus]                                                                                       | 42 | 6.2 | 42.96 | ⊙ |
|      | -                    | gi 6015131 sp Q63199 TNR6_RAT Tumor necrosis factor receptor superfamily member 6 precursor (FASLG receptor) (Apoptosis-mediating surface antigen FAS) (Apo-1 antigen) (CD95 antigen) | 29 | 6.3 | 39.15 | ⊙ |
|      | -                    | gi 29293821 ref NP_808793.1  platelet-activating factor acetylhydrolase 2 [Rattus norvegicus]                                                                                         | 35 | 6.2 | 44.77 | ⊙ |
|      | -                    | gi 34858218 ref XP_227432.2  PREDICTED: similar to TD and POZ domain containing 2 [Rattus norvegicus]                                                                                 | 38 | 6.1 | 43.14 | ⊙ |



The Rockefeller University  
1230 York Avenue,  
New York, NY 10021  
(212) 327-8000



**National Center for  
Research Resources**

National Resource  
for the Mass Spectrometric  
Analysis of Biological  
Macromolecules

|   |                                                                          |    |     |       |   |
|---|--------------------------------------------------------------------------|----|-----|-------|---|
| - | gi 14916547 sp O35824 DNJA2_RAT DnaJ homolog subfamily A member 2 (RDJ2) | 37 | 6.1 | 47.72 | 🔴 |
| - | gi 9507217 ref NP_062052.1  thymidylate synthase [Rattus norvegicus]     | 35 | 6.0 | 35.96 | 🔴 |

## NOTE:

1. To search again using **unmatched masses**, click the symbol 🔴.
2. Highly similar protein sequences were given the same rank (click "+" to expand/contract).

**Input Summary****Search id** A28D8E50-17B4-52A518CA**Sequences** 20092**Date & Time** Mon Jan 29 20:32:59 2007 UTC (Search Time: 0.50 sec.)**Sample ID****Database** NCBI nr [..\databases\nr]**Taxonomy** Rattus**Mass Range** 30 - 50 kDa**pI Range** 6.0 -7.0**Digestion** Trypsin**Missed Cuts** 1**Modifications** +C2H3ON@C(Complete); +O@M(Partial); +HPO3@STY (Partial); +CH2N2@K(Complete);**Charge State** MH+**Masses (avg)****Tolerance (avg)** 1.00 ppm

**Masses (mon)** 605.339 654.392 668.692 692.376 696.736 705.391 719.384  
722.746 724.769 725.770 753.803 768.379 791.411 798.484  
824.498 852.521 878.440 932.530 948.523 955.509 990.550  
1005.535 1027.552 1058.498 1070.510 1113.543 1184.641  
1211.592 1217.641 1223.612 1227.625 1241.677 1262.611  
1265.638 1276.644 1283.688 1330.615 1349.639 1381.792  
1413.715 1483.683 1520.730 1529.737 1538.754 1542.765  
1559.782 1568.748 1601.809 1622.765 1624.758 1632.725  
1642.770 1653.756 1664.753 1666.783 1684.796 1695.800  
1730.803 1743.811 1757.870 1762.878 1765.849 1779.877



|          |          |          |          |          |          |
|----------|----------|----------|----------|----------|----------|
| 1825.846 | 1827.866 | 1871.865 | 1879.932 | 1893.931 | 1902.854 |
| 1904.796 | 1908.953 | 1911.904 | 1914.903 | 1933.944 | 1935.859 |
| 1938.935 | 1948.934 | 1953.966 | 1962.927 | 1967.935 | 1974.902 |
| 1980.943 | 1982.955 | 1985.981 | 1991.954 | 2001.938 | 2012.969 |
| 2019.937 | 2020.978 | 2036.954 | 2037.994 | 2047.982 | 2051.932 |
| 2052.967 | 2070.973 | 2097.026 | 2122.053 | 2132.022 | 2149.039 |
| 2165.100 | 2172.057 | 2178.061 | 2179.084 | 2193.103 | 2234.115 |
| 2266.160 | 2306.132 | 2314.145 | 2315.110 | 2339.159 | 2341.194 |
| 2355.144 | 2368.162 | 2369.156 | 2375.231 | 2376.245 | 2382.177 |
| 2383.185 | 2391.271 | 2392.282 | 2418.245 | 2419.205 | 2433.234 |
| 2435.264 | 2447.240 | 2448.218 | 2458.225 | 2460.179 | 2490.178 |
| 2492.168 | 2497.228 | 2505.145 | 2516.240 | 2522.182 | 2523.109 |
| 2534.153 | 2535.173 | 2539.251 | 2540.157 | 2548.201 | 2554.200 |
| 2555.150 | 2574.159 | 2577.175 | 2589.183 | 2593.228 | 2594.191 |
| 2602.145 | 2610.302 | 2611.231 | 2637.172 | 2638.178 | 2650.222 |
| 2651.243 | 2673.253 | 2674.154 | 2676.138 | 2677.194 | 2682.207 |
| 2689.213 | 2719.271 | 2721.226 | 2735.291 | 2749.409 | 2750.425 |
| 2764.238 | 2775.186 | 2776.268 | 2785.317 | 2786.320 | 2794.251 |
| 2800.301 | 2806.264 | 2808.211 | 2811.353 | 2812.263 | 2818.297 |
| 2820.299 | 2828.305 | 2829.267 | 2833.357 | 2837.324 | 2839.262 |
| 2843.181 | 2845.279 | 2849.198 | 2850.276 | 2860.219 | 2862.288 |
| 2867.508 | 2868.401 | 2885.278 | 2887.215 | 2891.361 | 2892.339 |
| 2897.307 | 2906.371 | 2921.388 | 2934.387 | 2945.378 | 2946.339 |
| 2950.303 | 2953.319 | 2954.376 | 2962.399 | 2963.284 | 2977.397 |
| 2978.331 | 2991.266 | 2992.346 | 3000.536 | 3001.387 | 3004.407 |
| 3005.351 | 3010.343 | 3011.365 | 3020.375 | 3033.375 | 3034.390 |
| 3047.388 | 3052.334 | 3059.333 | 3060.372 | 3077.510 | 3094.519 |
| 3095.372 | 3105.471 | 3136.447 | 3139.467 | 3140.461 | 3174.347 |
| 3182.479 | 3183.357 | 3189.528 | 3190.538 | 3210.450 | 3221.494 |
| 3232.470 | 3233.437 | 3262.623 | 3271.499 | 3272.417 | 3294.499 |
| 3313.545 | 3326.657 | 3330.489 | 3331.462 | 3342.510 | 3352.456 |
| 3353.488 | 3367.587 | 3368.607 | 3374.489 | 3375.436 | 3380.422 |
| 3381.523 | 3391.622 | 3404.600 | 3408.566 | 3421.539 | 3433.650 |
| 3434.624 | 3440.548 | 3441.537 | 3453.540 | 3455.567 | 3460.558 |
| 3464.616 | 3465.640 | 3474.603 | 3475.488 | 3480.347 | 3485.460 |
| 3491.484 | 3510.485 | 3526.555 | 3543.620 | 3550.583 | 3576.642 |
| 3599.547 | 3613.721 | 3627.625 | 3643.683 | 3955.670 | 4223.927 |

**Tolerance** 22.00 ppm  
**(mon)**



**Number of 285  
Peptides**

# Laboratory of Mass Spectrometry and Gaseous Ion Chemistry

## PROWL

- ▶ **ProFound**
- ▶ **ProteinInfo**
- ▶ **PeptideMap**
- ▶ **PepFrag**
- ▶ **X! Tandem**
- ▶ **X! Hunter**
- ▶ **GPMDDB**
- ▶ **PROWL Home**
- ▶ **Chait Lab**

## ProFound



### Protein Candidates

| Rank | Expectation           | Protein Information and Sequence Analyse Tools (T)                                             | %  | pI  | kDa   | R |
|------|-----------------------|------------------------------------------------------------------------------------------------|----|-----|-------|---|
| 1    | 4.1×10 <sup>-16</sup> | gi 13929082 ref NP_113957.1  pyridoxal (pyridoxine, vitamin B6) kinase [Rattus norvegicus]     | 72 | 6.3 | 35.83 | ⊙ |
| +2   | 1.6×10 <sup>-13</sup> | gi 5669929 gb AAD46521.1 AF154914_1 cyclin H [Rattus norvegicus]                               | 48 | 7.1 | 39.10 | ⊙ |
| -    | -                     | gi 19865045 sp Q9R1A0 CCNH_RAT Cyclin-H                                                        | 43 | 6.7 | 39.10 | ⊙ |
| -    | -                     | gi 204362 gb AAA41234.1  pot. glutaminase (EC 3.5.1.2); putative                               | 36 | 5.6 | 37.58 | ⊙ |
| -    | -                     | gi 20070082 gb AAM00020.1  kidney-type glutaminase GAC isoform [Rattus norvegicus]             | 44 | 5.7 | 35.00 | ⊙ |
| -    | -                     | gi 6978491 ref NP_036630.1  aldehyde reductase 1 [Rattus norvegicus]                           | 50 | 6.3 | 37.29 | ⊙ |
| -    | -                     | gi 11693178 ref NP_071799.1  G protein beta subunit-like [Rattus norvegicus]                   | 38 | 5.5 | 36.95 | ⊙ |
| -    | -                     | gi 16758944 ref NP_446045.1  cyclin-dependent kinase 4 [Rattus norvegicus]                     | 58 | 6.1 | 34.47 | ⊙ |
| -    | -                     | gi 19386562 gb AAL86569.1  vesicular protein vp-165 short isoform [Rattus norvegicus]          | 48 | 5.2 | 39.37 | ⊙ |
| -    | -                     | gi 60131333 gb AAF01254.1 AF109643_1 coxsackie-adenovirus-receptor homolog [Rattus norvegicus] | 50 | 7.0 | 39.68 | ⊙ |
| -    | -                     | gi 408807 dbj BAA07490.1  regucalcin [Rattus norvegicus]                                       | 56 | 5.4 | 34.74 | ⊙ |
| -    | -                     | gi 13928740 ref NP_113734.1  regucalcin [Rattus norvegicus]                                    | 56 | 5.3 | 34.74 | ⊙ |
| -    | -                     | gi 1942645 pdb 1MIR A Chain A, Rat Procathepsin B                                              | 49 | 5.5 | 37.01 | ⊙ |
| -    | -                     | gi 56605830 ref NP_001008378.1  hypothetical protein LOC362793 [Rattus norvegicus]             | 62 | 5.3 | 35.74 | ⊙ |



The Rockefeller University  
1230 York Avenue,  
New York, NY 10021  
(212) 327-8000



**National Center for  
Research Resources**

National Resource  
for the Mass Spectrometric  
Analysis of Biological  
Macromolecules

|   |                                                                                                                                              |    |     |       |   |
|---|----------------------------------------------------------------------------------------------------------------------------------------------|----|-----|-------|---|
| - | gi 28948957 pdb 1NL4 A Chain A, Crystal Structure Of Rat Farnesyl Transferase In Complex With A Potent Biphenyl Inhibitor                    | 48 | 5.3 | 38.31 | 🔴 |
| - | gi 54780892 gb AAV40612.1  MHC class II antigen [Rattus norvegicus]                                                                          | 50 | 7.1 | 30.66 | 🔴 |
| - | gi 28373971 pdb 1N95 A Chain A, Aryl Tetrahydrophyridine Inhibitors Of Farnesyltransferase: Glycine, Phenylalanine And Histidine Derivatives | 48 | 5.5 | 38.69 | 🔴 |
| - | gi 50927086 gb AAH79324.1  LOC361776 [Rattus norvegicus]                                                                                     | 42 | 5.3 | 32.62 | 🔴 |
| - | gi 11691853 emb CAC18729.1  metalloprotease/disintegrin [Rattus norvegicus]                                                                  | 47 | 7.0 | 35.72 | 🔴 |
| - | gi 55778435 gb AAH86408.1  LOC246120 protein [Rattus norvegicus]                                                                             | 38 | 6.5 | 34.23 | 🔴 |
| - | gi 29468146 gb AAO85418.1 AF457139_1 MHC class Ib RT1.L [Rattus norvegicus]                                                                  | 40 | 5.6 | 37.71 | 🔴 |
| - | gi 8393944 ref NP_058835.1  proenkephalin 1 [Rattus norvegicus]                                                                              | 55 | 5.4 | 32.37 | 🔴 |
| - | gi 11560075 ref NP_071596.1  caspase 7 [Rattus norvegicus]                                                                                   | 51 | 5.5 | 35.96 | 🔴 |
| - | gi 53734234 gb AAH83675.1  Ring finger protein 146 [Rattus norvegicus]                                                                       | 25 | 5.2 | 39.48 | 🔴 |
| - | gi 51259507 gb AAH79425.1  Hypothetical protein LOC654482 [Rattus norvegicus]                                                                | 49 | 6.4 | 32.17 | 🔴 |
| - | gi 53733613 gb AAH83907.1  Hypothetical protein LOC502372 [Rattus norvegicus]                                                                | 42 | 6.0 | 35.65 | 🔴 |
| - | gi 8394272 ref NP_058967.1  nuclear distribution gene C homolog [Rattus norvegicus]                                                          | 40 | 5.3 | 39.82 | 🔴 |
| - | gi 8394516 ref NP_059046.1  plasminogen activator, urokinase receptor [Rattus norvegicus]                                                    | 40 | 6.7 | 37.59 | 🔴 |
| - | gi 16758208 ref NP_445916.1  spermidine synthase [Rattus norvegicus]                                                                         | 61 | 5.4 | 35.18 | 🔴 |
| - | gi 16758442 ref NP_446086.1  ficolin B [Rattus norvegicus]                                                                                   | 46 | 6.2 | 35.98 | 🔴 |
| - | gi 5070662 gb AAD39239.1 AF155822_1 kinesin heavy chain [Rattus norvegicus]                                                                  | 34 | 5.9 | 30.77 | 🔴 |

|   |                                                                                                                      |    |     |       |                                                                                     |
|---|----------------------------------------------------------------------------------------------------------------------|----|-----|-------|-------------------------------------------------------------------------------------|
| - | gi 34868134 ref XP_235618.2  PREDICTED: similar to Ankyrin repeat and SOCS box protein 8 (ASB-8) [Rattus norvegicus] | 50 | 5.6 | 32.78 |   |
| - | gi 2145143 gb AAB58428.1  apolipoprotein A-I [Rattus norvegicus]                                                     | 43 | 5.5 | 30.88 |  |
| - | gi 2145145 gb AAB58429.1  apolipoprotein A-I [Rattus norvegicus]                                                     | 43 | 5.5 | 30.97 |  |
| - | gi 55824680 gb AAH86587.1  Gs3 protein [Rattus norvegicus]                                                           | 42 | 5.6 | 35.96 |  |

## NOTE:

1. To search again using **unmatched masses**, click the symbol .
2. Highly similar protein sequences were given the same rank (click "+" to expand/contract).

**Input Summary****Search id** AE01B3E8-0C40-5E19243E**Sequences** 20092**Date & Time** Mon Jan 29 18:41:27 2007 UTC (Search Time: 0.53 sec.)**Sample ID****Database** NCBI nr [..\databases\nr]**Taxonomy** Rattus**Mass Range** 30 - 40 kDa**pI Range** 5.0 -7.2**Digestion** Trypsin**Missed Cuts** 1**Modifications** +C2H3ON@C(Complete); +O@M(Partial); +HPO3@STY (Partial); +CH2N2@K(Complete);**Charge State** MH+**Masses (avg)****Tolerance (avg)** 1.00 ppm

**Masses (mon)** 605.337 654.394 659.424 660.384 672.403 676.381 678.354  
705.393 719.384 768.377 824.510 888.490 902.475 904.474  
918.468 948.524 990.546 1005.446 1028.522 1030.506  
1058.495 1063.512 1076.534 1080.493 1130.589 1177.587  
1195.589 1199.638 1215.626 1217.642 1223.599 1227.567  
1233.637 1244.589 1250.609 1258.572 1262.606 1268.612  
1280.646 1296.617 1305.636 1312.616 1322.678 1330.611  
1357.623 1361.622 1371.668 1375.668 1379.665 1388.698  
1404.685 1424.676 1432.709 1443.681 1454.702 1456.718  
1464.685 1469.710 1482.696 1486.708 1494.711 1501.696  
1504.724 1509.714 1520.711 1529.735 1542.767 1553.737  
1557.806 1568.762 1584.773 1589.762 1602.806 1616.759  
1630.762 1632.770 1639.748 1642.768 1672.774 1678.784  
1685.823 1690.779 1695.794 1712.787 1724.805 1730.819  
1734.825 1743.815 1757.867 1762.840 1791.821 1827.867  
1838.876 1855.875 1893.856 1903.873 1905.891 1929.907  
1932.909 1962.922 1987.927 2005.916 2006.936 2017.937  
2018.926 2023.955 2031.967 2032.947 2049.969 2050.977  
2057.982 2058.975 2070.971 2096.985 2122.009 2152.049  
2176.055 2181.056 2209.105 2241.114 2242.124 2265.146  
2266.147 2290.151 2291.155 2306.151 2355.146 2363.147  
2364.148 2368.146 2369.146 2381.147 2382.145 2390.148  
2397.135 2398.191 2408.147 2436.188 2450.188 2458.180  
2464.214 2465.256 2495.197 2507.240 2514.214 2531.187  
2532.181 2541.208 2542.205 2557.209 2558.208 2572.200  
2581.215 2582.226 2590.213 2604.256 2605.228 2622.243  
2630.297 2631.181 2638.240 2639.241 2647.241 2648.220  
2662.195 2663.223 2668.225 2669.241 2678.221 2679.251  
2688.251 2689.250 2695.292 2696.248 2713.262 2714.274  
2718.258 2719.260 2727.288 2728.281 2733.295 2741.277  
2742.262 2749.313 2765.329 2766.310 2774.331 2775.229  
2779.304 2780.289 2789.286 2790.299 2793.281 2794.279  
2806.314 2817.293 2818.321 2832.286 2833.317 2836.326  
2837.369 2850.322 2851.311 2866.379 2887.326 2888.360  
2893.326 2894.389 2906.367 2937.366 2944.329 2945.339  
2949.358 2950.349 2962.357 2963.343 2979.405 2994.341  
2995.357 2998.338 2999.364 3004.374 3005.276 3011.406  
3018.387 3029.404 3030.363 3033.331 3034.374 3048.361  
3049.336 3058.384 3059.379 3064.364 3065.402 3077.435



|          |          |          |          |          |          |
|----------|----------|----------|----------|----------|----------|
| 3084.337 | 3085.374 | 3107.418 | 3114.433 | 3138.472 | 3147.480 |
| 3148.486 | 3185.487 | 3202.500 | 3203.492 | 3213.524 | 3214.518 |
| 3218.522 | 3230.507 | 3244.504 | 3245.500 | 3262.520 | 3275.469 |
| 3276.485 | 3281.513 | 3309.560 | 3310.531 | 3316.522 | 3325.544 |
| 3326.545 | 3335.489 | 3336.540 | 3342.521 | 3350.473 | 3351.596 |
| 3368.569 | 3382.503 | 3384.502 | 3395.561 | 3398.564 | 3399.541 |
| 3418.610 | 3419.551 | 3427.523 | 3428.487 | 3432.533 | 3433.542 |
| 3446.577 | 3447.549 | 3459.616 | 3460.481 | 3472.554 | 3486.570 |
| 3487.522 | 3498.594 | 3511.589 | 3518.583 | 3534.634 | 3544.613 |
| 3560.590 | 3572.679 | 3585.648 | 3601.566 | 3611.637 | 3633.680 |
| 3645.656 | 3653.587 | 3669.627 | 3679.746 | 3684.594 | 3691.701 |
| 3701.698 | 3710.666 | 3718.704 | 3725.706 | 3744.707 | 3754.638 |
| 3759.618 | 3771.705 | 3787.679 | 3797.747 | 3814.705 | 3836.692 |
| 3845.727 | 3851.662 | 3891.750 | 3898.746 | 4250.928 | 4501.955 |
| 4519.830 | 4536.468 | 4561.549 |          |          |          |

**Tolerance** 33.00 ppm  
**(mon)**

**Number of** 323  
**Peptides**

# Laboratory of Mass Spectrometry and Gaseous Ion Chemistry

## PROWL

- **ProFound**
- **ProteinInfo**
- **PeptideMap**
- **PepFrag**
- **X! Tandem**
- **X! Hunter**
- **GPMDDB**
- **PROWL Home**
- **Chait Lab**



The Rockefeller University  
1230 York Avenue,  
New York, NY 10021  
(212) 327-8000



**National Center for  
Research Resources**

National Resource  
for the Mass Spectrometric  
Analysis of Biological  
Macromolecules

## ProFound



### Protein Candidates

| Rank | Expectation           | Protein Information and Sequence Analyse Tools (T)                                                                                                                                           | %  | pI  | kDa   | R |
|------|-----------------------|----------------------------------------------------------------------------------------------------------------------------------------------------------------------------------------------|----|-----|-------|---|
| +1   | 2.3×10 <sup>-12</sup> | gi 38649320 gb AAH63174.1  Eno1 protein [Rattus norvegicus]                                                                                                                                  | 35 | 6.7 | 53.26 | ● |
| -    |                       | gi 56757324 sp P04764 ENOA_RAT Alpha-enolase (2-phospho-D-glycerate hydro-lyase) (Non-neural enolase) (NNE) (Enolase 1)                                                                      | 32 | 6.2 | 48.97 | ● |
| -    |                       | gi 6978809 ref NP_036686.1  enolase 1, alpha [Rattus norvegicus]                                                                                                                             | 25 | 6.2 | 48.95 | ● |
| -    |                       | gi 48686579 gb AAT46045.1  cyclin A2 variant [Rattus norvegicus]                                                                                                                             | 29 | 6.9 | 45.22 | ● |
| -    |                       | gi 2499877 sp P70645 BLMH_RAT Bleomycin hydrolase (BLM hydrolase) (BMH) (BH)                                                                                                                 | 27 | 6.0 | 54.40 | ● |
| -    |                       | gi 115720 sp P24268 CATD_RAT Cathepsin D precursor [Contains: Cathepsin D 12 kDa light chain; Cathepsin D 9 kDa light chain; Cathepsin D 34 kDa heavy chain; Cathepsin D 30 kDa heavy chain] | 20 | 6.7 | 46.35 | ● |
| -    |                       | gi 6981296 ref NP_037123.1  nucleoporin 50 [Rattus norvegicus]                                                                                                                               | 24 | 6.3 | 52.15 | ● |
| -    |                       | gi 19705545 ref NP_599238.1  RAB3A interacting protein (rabin3)-like 1 [Rattus norvegicus]                                                                                                   | 28 | 6.1 | 43.47 | ● |
| -    |                       | gi 28373972 pdb 1N95 B Chain B, Aryl Tetrahydrophyridine Inhibitors Of Farnesyltransferase: Glycine, Phenylalanine And Histidine Derivatives                                                 | 18 | 6.1 | 46.40 | ● |
| -    |                       | gi 28948958 pdb 1NL4 B Chain B, Crystal Structure Of Rat Farnesyl Transferase In Complex With A Potent Biphenyl Inhibitor                                                                    | 18 | 6.1 | 46.30 | ● |



|   |                                                                                                                                                           |    |     |       |  |
|---|-----------------------------------------------------------------------------------------------------------------------------------------------------------|----|-----|-------|--|
| - | <a href="#">gi 3891484 pdb 1FT2 B</a> Chain B, Co-Crystal Structure Of Protein Farnesyltransferase Complexed With A Farnesyl Diphosphate Substrate        | 18 | 6.1 | 46.25 |  |
| - | <a href="#">gi 28373970 pdb 1N94 B</a> Chain B, Aryl Tetrahydropyridine Inhibitors Of Farnesyltransferase: Glycine, Phenylalanine And Histidine Derivates | 18 | 6.1 | 45.90 |  |
| - | <a href="#">gi 54035288 gb AAH83566.1</a> Enolase 3, beta [Rattus norvegicus]                                                                             | 20 | 7.1 | 48.94 |  |
| - | <a href="#">gi 50925459 gb AAH78772.1</a> Pcyt2 protein [Rattus norvegicus]                                                                               | 21 | 6.4 | 44.89 |  |
| - | <a href="#">gi 54035294 gb AAH83724.1</a> Unknown (protein for IMAGE: 7191109) [Rattus norvegicus]                                                        | 18 | 6.7 | 42.14 |  |
| - | <a href="#">gi 20150494 pdb 1JQI A</a> Chain A, Crystal Structure Of Rat Short Chain Acyl-Coa Dehydrogenase Complexed With Acetoacetyl-Coa                | 21 | 6.4 | 43.37 |  |
| - | <a href="#">gi 24987409 pdb 1JQP A</a> Chain A, Dipeptidyl Peptidase I (Cathepsin C), A Tetrameric Cysteine Protease Of The Papain Family                 | 23 | 6.9 | 51.45 |  |
| - | <a href="#">gi 2500146 sp P56163 DPF1_RAT</a> Zinc-finger protein neuro-d4 (D4, zinc and double PHD fingers family 1)                                     | 23 | 6.8 | 47.78 |  |
| - | <a href="#">gi 27703780 ref XP_225049.1</a> PREDICTED: similar to zinc finger protein, subfamily 1A, 5 [Rattus norvegicus]                                | 18 | 6.6 | 45.98 |  |
| - | <a href="#">gi 18034777 ref NP_542143.1</a> apolipoprotein A-V [Rattus norvegicus]                                                                        | 22 | 6.0 | 42.14 |  |
| - | <a href="#">gi 56325 emb CAA68545.1</a> unnamed protein product [Rattus norvegicus]                                                                       | 15 | 6.1 | 57.73 |  |

## NOTE:

1. To search again using **unmatched masses**, click the symbol .
2. Highly similar protein sequences were given the same rank (click "+" to expand/contract).

**Input Summary**

Search id B1B9B633-0888-61D127F6

Sequences 20092

Date &amp; Time Mon Jan 29 18:47:32 2007 UTC (Search Time: 0.45 sec.)

**Sample ID****Database** NCBI nr [..\databases\nr]**Taxonomy** Rattus**Mass Range** 42 - 58 kDa**pI Range** 6.0 -7.2**Digestion** Trypsin**Missed Cuts** 1**Modifications** +C2H3ON@C(Complete); +O@M(Partial); +HPO3@STY  
(Partial); +CH2N2@K(Complete);**Charge State** MH+**Masses (avg)****Tolerance (avg)** 1.00 ppm

**Masses (mon)** 640.662 654.394 668.685 696.737 704.410 710.749 719.383  
722.731 724.768 725.771 738.785 753.803 754.805 766.815  
767.802 778.814 791.415 795.816 797.852 806.449 811.870  
813.854 824.497 832.305 850.429 852.489 857.510 877.416  
918.467 920.469 948.522 955.506 990.546 1000.536 1005.532  
1037.554 1057.501 1088.540 1194.604 1217.641 1223.607  
1233.640 1244.591 1247.617 1262.613 1265.629 1280.640  
1312.601 1322.684 1329.627 1347.640 1455.723 1481.755  
1529.732 1542.773 1560.790 1624.750 1675.833 1713.797  
1757.857 1779.861 1804.934 1828.868 1846.909 1922.926  
1929.943 2002.926 2003.934 2144.017 2241.123 2242.139  
2291.137 2339.175 2341.201 2373.135 2374.175 2382.212  
2392.227 2434.297 2492.136 2532.115 2533.165 2556.145  
2611.190 2702.208 2746.209 3004.357 3022.432 3029.525  
3047.591 3063.581 3064.558 3075.346 3077.497 3105.424  
3112.523 3113.561 3146.452 3147.517 3154.409 3173.489  
3174.458 3190.518 3191.458 3210.459 3220.490 3233.459  
3234.477 3262.450 3272.556 3273.486 3281.520 3292.599  
3293.646 3316.495 3324.450 3325.490 3335.549 3336.565  
3342.679 3355.570 3367.670 3382.651 3383.521 3398.500  
3404.495 3410.560 3418.654 3433.564 3444.543 3663.721  
3691.753 3881.815 4109.070 4458.692 4500.278 4534.361

**Tolerance** 26.00 ppm  
**(mon)**



**Number of 137  
Peptides**

PROWL

## ProFound

- [ProFound](#)
- [ProteinInfo](#)
- [PeptideMap](#)
- [PepFrag](#)
- [X! Tandem](#)
- [X! Hunter](#)
- [GPMDB](#)
- [PROWL Home](#)
- [Chait Lab](#)

The Rockefeller  
University

The Rockefeller University  
1230 York Avenue,  
New York, NY 10021  
(212) 327-8000

National Center of  
Research Resources

National Resource  
for the Mass Spectrometric  
Analysis of Biological  
Macromolecules

## Protein Candidates

| Rank | Expectation           | Protein Information and Sequence Analyse Tools (T)                                                                                                                                                                                                                | %                  | pI  | kDa   | R                        |
|------|-----------------------|-------------------------------------------------------------------------------------------------------------------------------------------------------------------------------------------------------------------------------------------------------------------|--------------------|-----|-------|--------------------------|
| +1   | 9.2×10 <sup>-14</sup> | <a href="#">gi 417220 sp P80204 TGFR1_RAT</a> TGF-beta receptor type-1 precursor (TGF-beta receptor type I) (TGFR-1) (TGF-beta type I receptor) (Transforming growth factor-beta receptor type I) (TbetaR-I) (Serine/threonine-protein kinase receptor R4) (SKR4) | <a href="#">13</a> | 7.3 | 58.22 | <input type="checkbox"/> |
|      | -                     | <a href="#">gi 56540874 gb AAH87035.1</a> Transforming growth factor, beta receptor 1 [Rattus norvegicus]                                                                                                                                                         | <a href="#">13</a> | 7.3 | 57.83 | <input type="checkbox"/> |
| 2    | 8.7×10 <sup>-9</sup>  | <a href="#">gi 27716061 ref XP_233452.1</a> PREDICTED: similar to zinc finger protein 691 [Rattus norvegicus]                                                                                                                                                     | <a href="#">21</a> | 8.9 | 33.69 | <input type="checkbox"/> |
| 3    | 6.5×10 <sup>-8</sup>  | <a href="#">gi 56090624 ref NP_001007676.1</a> C1q and tumor necrosis factor related protein 1 [Rattus norvegicus]                                                                                                                                                | <a href="#">20</a> | 6.1 | 33.05 | <input type="checkbox"/> |
| 4    | 9.1×10 <sup>-7</sup>  | <a href="#">gi 1932801 gb AAB51686.1</a> synaptotagmin X [Rattus norvegicus]                                                                                                                                                                                      | <a href="#">8</a>  | 8.3 | 58.73 | <input type="checkbox"/> |
| 5    | 9.9×10 <sup>-7</sup>  | <a href="#">gi 39930465 ref NP_113854.1</a> synaptotagmin X [Rattus norvegicus]                                                                                                                                                                                   | <a href="#">8</a>  | 8.4 | 61.39 | <input type="checkbox"/> |
| 6    | 2.2×10 <sup>-6</sup>  | <a href="#">gi 16758014 ref NP_445770.1</a> hemopexin [Rattus norvegicus]                                                                                                                                                                                         | <a href="#">12</a> | 7.9 | 53.02 | <input type="checkbox"/> |
| 7    | 2.3×10 <sup>-6</sup>  | <a href="#">gi 54035429 gb AAH83903.1</a> Kelch-like 7 (Drosophila) [Rattus norvegicus]                                                                                                                                                                           | <a href="#">7</a>  | 6.2 | 68.73 | <input type="checkbox"/> |
| 8    | 6.4×10 <sup>-6</sup>  | <a href="#">gi 41054868 ref NP_955788.1</a> fucose-1-phosphate guanylyltransferase [Rattus norvegicus]                                                                                                                                                            | <a href="#">9</a>  | 7.0 | 68.14 | <input type="checkbox"/> |
| 9    | 1.8×10 <sup>-5</sup>  | <a href="#">gi 53850644 ref NP_001005558.1</a> hypothetical protein LOC313430 [Rattus norvegicus]                                                                                                                                                                 | <a href="#">9</a>  | 6.3 | 68.41 | <input type="checkbox"/> |
| 10   | 2.8×10 <sup>-5</sup>  | <a href="#">gi 6978449 ref NP_036623.1</a> adducin 2 (beta) [Rattus norvegicus]                                                                                                                                                                                   | <a href="#">8</a>  | 6.1 | 64.40 | <input type="checkbox"/> |
| 11   | 6.9×10 <sup>-5</sup>  | <a href="#">gi 1552374 emb CAA69358.1</a> 2-arylpropionyl-CoA epimerase [Rattus norvegicus]                                                                                                                                                                       | <a href="#">12</a> | 6.1 | 40.75 | <input type="checkbox"/> |
| 12   | 3.6×10 <sup>-4</sup>  | <a href="#">gi 24987409 pdb 1JQP A</a> Chain A, Dipeptidyl Peptidase I (Cathepsin C), A Tetrameric Cysteine Protease Of The Papain Family                                                                                                                         | <a href="#">7</a>  | 6.9 | 51.45 | <input type="checkbox"/> |
| 13   | 1.1×10 <sup>-3</sup>  | <a href="#">gi 7106246 ref NP_037191.1</a> alkaline phosphatase, tissue-nonspecific [Rattus norvegicus]                                                                                                                                                           | <a href="#">9</a>  | 6.5 | 59.30 | <input type="checkbox"/> |
| 14   | 1.1×10 <sup>-3</sup>  | <a href="#">gi 130751 sp P08289 PPBT_RAT</a> Alkaline phosphatase, tissue-nonspecific isozyme precursor (AP-TNAP) (Liver/bone/kidney isozyme) (TNSALP)                                                                                                            | <a href="#">9</a>  | 6.4 | 59.25 | <input type="checkbox"/> |
| 15   | 1.7×10 <sup>-3</sup>  | <a href="#">gi 91940 pir  S00289</a> alkaline phosphatase (EC 3.1.3.1), hepatic precursor - rat                                                                                                                                                                   | <a href="#">9</a>  | 6.3 | 59.51 | <input type="checkbox"/> |
| 16   | 4.7×10 <sup>-3</sup>  | <a href="#">gi 223231 prf  0610238A</a> amylase                                                                                                                                                                                                                   | <a href="#">11</a> | 8.7 | 58.16 | <input type="checkbox"/> |
| 17   | 4.7×10 <sup>-3</sup>  | <a href="#">gi 67373 pir  ALRTP</a> alpha-amylase (EC 3.2.1.1) precursor, pancreatic - rat (fragment)                                                                                                                                                             | <a href="#">11</a> | 8.7 | 58.23 | <input type="checkbox"/> |

## NOTE:

- To search again using [unmatched masses](#), click the symbol .
- Highly similar protein sequences were given the same rank (click "+" to expand/contract).

**Input Summary****Search id** B44455F9-05FC-645D2AA5**Sequences** 20092**Date & Time** Tue Jan 30 20:01:14 2007 UTC (Search Time: 0.28 sec.)**Sample ID** 20061228 richardson NIA set 1 spot 4704, 20070130, cleaned data search 2**Database** NCBIInr [..\databases\nr]**Taxonomy** Rattus**Mass Range** 30 - 70 kDa**pI Range** 6.0 -9.0**Digestion** Trypsin**Missed Cuts** 0**Modifications** +C2H3ON@C(Complete); +NO2-H@Y(Partial); +CH2N2@K(Complete);**Charge State** MH+**Masses (avg)****Tolerance (avg)** 1.00 ppm

**Masses (mon)** 841.471 848.445 1064.521 1203.536 1211.585 1242.571 1268.616 1305.647  
 1323.679 1828.866 1894.881 1905.897 1914.886 1928.901 1932.893 1992.938  
 2023.946 2036.949 2037.958 2039.919 2099.973 2100.956 2118.986 2124.012  
 2125.014 2152.048 2183.085 2209.084 2241.125 2242.141 2298.152 2365.173  
 2366.185 2376.151 2377.170 2390.177 2398.149 2399.166 2420.163 2435.196  
 2448.177 2460.160 2506.164 2507.194 2514.186 2533.160 2534.136 2536.181  
 2538.190 2547.193 2548.196 2557.199 2558.196 2562.195 2563.197 2593.200  
 2606.214 2607.232 2638.237 2639.251 2648.262 2649.230 2651.202 2652.227  
 2669.241 2675.247 2676.203 2680.237 2681.244 2687.221 2688.226 2694.260  
 2700.333 2701.245 2705.247 2722.228 2723.283 2733.276 2734.258 2742.251  
 2743.261 2749.197 2750.259 2762.279 2763.267 2767.275 2768.347 2772.261  
 2773.273 2783.270 2784.297 2789.260 2790.260 2801.291 2802.305 2819.309  
 2820.312 2832.320 2837.313 2838.288 2849.299 2850.294 2865.298 2879.307  
 2893.359 2894.317 2915.403 2916.494 2935.359 2936.330 2949.344 2959.311  
 2960.344 2965.315 2977.332 2978.259 2982.416 2983.344 2995.375 2996.336  
 3003.367 3010.332 3011.329 3020.356 3029.452 3033.376 3034.366 3047.502  
 3048.503 3065.392 3066.379 3094.461 3105.391 3147.428 3148.456 3180.486  
 3181.478 3185.440 3187.449 3198.489 3211.469 3212.457 3218.448 3228.454  
 3244.485 3245.464 3262.478 3272.451 3273.492 3283.453 3284.498 3298.490  
 3314.485 3329.474 3330.548 3357.506 3358.501 3371.531 3372.551 3384.527



|          |          |          |          |          |          |          |          |
|----------|----------|----------|----------|----------|----------|----------|----------|
| 3385.486 | 3391.589 | 3404.527 | 3418.534 | 3419.508 | 3420.556 | 3429.595 | 3436.560 |
| 3437.547 | 3447.534 | 3450.485 | 3451.582 | 3466.557 | 3467.574 | 3475.573 | 3476.581 |
| 3478.554 | 3479.500 | 3485.481 | 3486.577 | 3501.586 | 3510.582 | 3517.572 | 3524.626 |
| 3533.621 | 3539.568 | 3556.600 | 3568.610 | 3576.560 | 3588.634 | 3601.648 | 3611.655 |
| 3620.604 | 3631.584 | 3640.568 | 3648.670 | 3663.643 | 3677.695 | 3690.659 | 3705.678 |
| 3713.635 | 3726.661 | 3740.698 | 3745.666 | 3754.671 | 3764.654 | 3773.719 | 3781.684 |
| 3792.584 | 3798.758 | 3814.692 | 3820.635 | 3824.709 | 3830.762 | 3848.750 | 3869.662 |
| 3884.711 | 3899.770 | 4151.814 | 4191.020 |          |          |          |          |

**Tolerance (mon)** 8.00 ppm

**Number of Peptides** 220

# Laboratory of Mass Spectrometry and Gaseous Ion Chemistry

## PROWL

- **ProFound**
- **ProteinInfo**
- **PeptideMap**
- **PepFrag**
- **X! Tandem**
- **X! Hunter**
- **GPMDDB**
- **PROWL Home**
- **Chait Lab**

## ProFound



### Protein Candidates

| Rank | Expectation           | Protein Information and Sequence Analyse Tools (T)                                                                                                          | %  | pI  | kDa   | R |
|------|-----------------------|-------------------------------------------------------------------------------------------------------------------------------------------------------------|----|-----|-------|---|
| 1    | 6.4×10 <sup>-11</sup> | gi 6978605 ref NP_037054.1  caspase 3 [Rattus norvegicus]                                                                                                   | 40 | 5.9 | 32.81 | ● |
| 2    | 6.8×10 <sup>-10</sup> | gi 57164143 ref NP_001009268.1  ARP2 actin-related protein 2 homolog [Rattus norvegicus]                                                                    | 31 | 6.3 | 46.05 | ● |
| 3    | 2.9×10 <sup>-8</sup>  | gi 24987409 pdb 1JQP A Chain A, Dipeptidyl Peptidase I (Cathepsin C), A Tetrameric Cysteine Protease Of The Papain Family                                   | 30 | 6.9 | 51.45 | ● |
| 4    | 2.4×10 <sup>-7</sup>  | gi 55669578 pdb 1QX4 A Chain A, Structrue Of S127p Mutant Of Cytochrome B5 Reductase                                                                        | 28 | 7.2 | 32.21 | ● |
| 5    | 1.6×10 <sup>-6</sup>  | gi 225691 prf  1310344A decarboxylase,uroporphyrinogen                                                                                                      | 28 | 6.5 | 41.62 | ● |
| 6    | 2.2×10 <sup>-6</sup>  | gi 56922 emb CAA33606.1  unnamed protein product [Rattus norvegicus]                                                                                        | 24 | 6.0 | 53.67 | ● |
| 7    | 2.4×10 <sup>-6</sup>  | gi 17943396 pdb 1IB0 A Chain A, Crystal Structure Of Rat B5r In Complex With Fad And Nad                                                                    | 24 | 7.2 | 32.20 | ● |
| 8    | 3.5×10 <sup>-6</sup>  | gi 1167999 gb AAB35050.1  spermidine synthase, putrescine aminopropyltransferase, PAPT {EC 2.5.1.6} [rats, Peptide, 297 aa]                                 | 33 | 6.5 | 35.05 | ● |
| 9    | 3.8×10 <sup>-6</sup>  | gi 56971338 gb AAH88271.1  Similar to Ig gamma-1, chain C region [Rattus norvegicus]                                                                        | 25 | 7.2 | 53.56 | ● |
| +10  | 1.0×10 <sup>-5</sup>  | gi 19924067 ref NP_612541.1  nucleoside-diphosphate kinase 7 [Rattus norvegicus]                                                                            | 18 | 6.3 | 46.02 | ● |
|      | -                     | gi 37805418 gb AAH60314.1  Non-metastatic cells 7, protein expressed in [Rattus norvegicus]                                                                 | 18 | 6.3 | 45.99 | ● |
| 11   | 1.3×10 <sup>-5</sup>  | gi 1169826 sp P43424 GALT_RAT Galactose-1-phosphate uridylyltransferase (Gal-1-P uridylyltransferase) (UDP-glucose--hexose-1-phosphate uridylyltransferase) | 34 | 6.1 | 44.24 | ● |

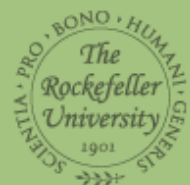

The Rockefeller University  
1230 York Avenue,  
New York, NY 10021  
(212) 327-8000



**National Center for  
Research Resources**

National Resource  
for the Mass Spectrometric  
Analysis of Biological  
Macromolecules

|     |                      |                                      |                                                                                |    |     |       |   |
|-----|----------------------|--------------------------------------|--------------------------------------------------------------------------------|----|-----|-------|---|
| +12 | 1.4×10 <sup>-5</sup> | gi 7001384 gb AAF34874.1 AF168004_1  | Parkin [Rattus norvegicus]                                                     | 26 | 6.7 | 53.81 | 🔴 |
|     | -                    | gi 20385790 gb AAM21453.1 AF381278_1 | parkin isoform [Rattus norvegicus]                                             | 21 | 6.6 | 51.83 | 🔴 |
|     | -                    | gi 20385796 gb AAM21456.1 AF381281_1 | parkin isoform [Rattus norvegicus]                                             | 16 | 6.8 | 51.45 | 🔴 |
| 13  | 2.0×10 <sup>-5</sup> | gi 3133137 dbj BAA28175.1            | N-Shc [Rattus rattus]                                                          | 17 | 6.9 | 53.57 | 🔴 |
| 14  | 1.0×10 <sup>-4</sup> | gi 416892 sp P32362 DCUP_RAT         | Uroporphyrinogen decarboxylase (URO-D) (UPD)                                   | 22 | 6.4 | 41.35 | 🔴 |
| +15 | 1.3×10 <sup>-4</sup> | gi 228136 prf  1717354A              | Gln synthetase                                                                 | 22 | 6.4 | 41.88 | 🔴 |
|     | -                    | gi 204349 gb AAC42038.1              | glutamine synthetase                                                           | 21 | 6.8 | 43.81 | 🔴 |
|     | -                    | gi 38181948 gb AAH61559.1            | Glul protein [Rattus norvegicus]                                               | 21 | 6.5 | 43.79 | 🔴 |
|     | -                    | gi 121376 sp P09606 GLNA_RAT         | Glutamine synthetase (Glutamate--ammonia ligase) (GS)                          | 21 | 6.6 | 43.79 | 🔴 |
| 16  | 2.0×10 <sup>-4</sup> | gi 21105476 gb AAM34681.1 AF508019_1 | arginase-related protein [Rattus norvegicus]                                   | 26 | 6.1 | 38.59 | 🔴 |
| +17 | 2.9×10 <sup>-4</sup> | gi 50925537 gb AAH78930.1            | Acy1 protein [Rattus norvegicus]                                               | 26 | 6.0 | 46.83 | 🔴 |
|     | -                    | gi 52851387 ref NP_001005383.1       | aminoacylase 1 [Rattus norvegicus]                                             | 26 | 5.9 | 46.93 | 🔴 |
| 18  | 2.9×10 <sup>-4</sup> | gi 27703780 ref XP_225049.1          | PREDICTED: similar to zinc finger protein, subfamily 1A, 5 [Rattus norvegicus] | 19 | 6.6 | 45.98 | 🔴 |
|     | -                    | gi 50925641 gb AAH79049.1            | Calreticulin 3 [Rattus norvegicus]                                             | 28 | 6.0 | 45.92 | 🔴 |
|     | -                    | gi 34858816 ref XP_215857.2          | PREDICTED: similar to CG8067-PA [Rattus norvegicus]                            | 24 | 6.0 | 38.97 | 🔴 |
|     | -                    | gi 51948384 ref NP_001004206.1       | proliferation-associated 2G4, 38kDa [Rattus norvegicus]                        | 22 | 6.4 | 45.75 | 🔴 |
|     | -                    | gi 8394193 ref NP_059037.1           | lipase, gastric [Rattus norvegicus]                                            | 24 | 6.1 | 45.72 | 🔴 |
|     | -                    | gi 15420315 gb AAK97344.1            | interleukin-5 receptor alpha [Rattus norvegicus]                               | 16 | 6.9 | 48.75 | 🔴 |
|     | -                    | gi 16758704 ref NP_446297.1          | ureidopropionase, beta [Rattus norvegicus]                                     | 23 | 6.5 | 45.35 | 🔴 |



|   |                                                                                                                            |    |     |       |   |
|---|----------------------------------------------------------------------------------------------------------------------------|----|-----|-------|---|
| - | gi 57012410 ref NP_001008849.1  RT1 class I, M1, gene 2 [Rattus norvegicus]                                                | 17 | 6.8 | 40.27 | 🔴 |
| - | gi 53850618 ref NP_001005545.1  MYG1 protein [Rattus norvegicus]                                                           | 25 | 6.0 | 43.75 | 🔴 |
| - | gi 27706912 ref XP_228584.1  PREDICTED: similar to HIN-6 protease [Rattus norvegicus]                                      | 17 | 7.2 | 34.65 | 🔴 |
| - | gi 14389301 ref NP_112650.1  sphingomyelin phosphodiesterase 2, neutral [Rattus norvegicus]                                | 19 | 6.6 | 49.42 | 🔴 |
| - | gi 7839599 gb AAF70344.1  p47phox [Rattus norvegicus]                                                                      | 28 | 7.1 | 36.82 | 🔴 |
| - | gi 56605708 ref NP_001008315.1  makorin, ring finger protein, 2 [Rattus norvegicus]                                        | 25 | 7.3 | 49.32 | 🔴 |
| - | gi 347021 pir  S29690 Ig heavy chain VDJ region - rat (fragment)                                                           | 24 | 6.5 | 32.67 | 🔴 |
| - | gi 4379409 emb CAA48681.1  Ig heavy chain VDJh2 region [Rattus norvegicus]                                                 | 24 | 6.4 | 32.69 | 🔴 |
| - | gi 50925654 gb AAH79068.1  DTW domain containing 1 [Rattus norvegicus]                                                     | 22 | 6.6 | 36.27 | 🔴 |
| - | gi 34866113 ref XP_343235.1  PREDICTED: similar to Tetratricopeptide repeat protein KIAA0103 [Rattus norvegicus]           | 25 | 6.4 | 35.91 | 🔴 |
| - | gi 47606369 ref NP_001001278.1  olfactory receptor Olr382 [Rattus norvegicus]                                              | 23 | 6.3 | 36.30 | 🔴 |
| - | gi 42476312 ref NP_714955.2  serine (or cysteine) proteinase inhibitor, clade B (ovalbumin), member 10 [Rattus norvegicus] | 17 | 6.2 | 46.59 | 🔴 |
| - | gi 16758340 ref NP_446020.1  phosphate cytidyltransferase 2, ethanolamine [Rattus norvegicus]                              | 15 | 6.2 | 46.68 | 🔴 |
| - | gi 50925459 gb AAH78772.1  Pcyt2 protein [Rattus norvegicus]                                                               | 16 | 6.4 | 44.89 | 🔴 |
| - | gi 21311520 gb AAM46762.1 AF458414_1 flavin-containing monooxygenase 2 [Rattus norvegicus]                                 | 14 | 7.2 | 50.95 | 🔴 |
| - | gi 50925581 gb AAH78977.1  Phytanoyl-CoA hydroxylase interacting protein-like [Rattus norvegicus]                          | 16 | 6.9 | 39.12 | 🔴 |
| - | gi 27692997 ref XP_227419.1  PREDICTED: similar to Pygopus homolog 2 [Rattus norvegicus]                                   | 27 | 6.9 | 42.01 | 🔴 |

|   |                                                                                                      |    |     |       |  |
|---|------------------------------------------------------------------------------------------------------|----|-----|-------|--|
| - | gi 37222638 gb AAQ90023.1  estrogen receptor-related receptor gamma [Rattus norvegicus]              | 19 | 6.0 | 53.65 |  |
| - | gi 50400205 sp P62510 ERR3_RAT Estrogen-related receptor gamma (Estrogen receptor-related protein 3) | 19 | 6.0 | 53.57 |  |
| - | gi 56972083 gb AAH88196.1  Similar to KT112 homolog, chromatin associated [Rattus norvegicus]        | 24 | 7.0 | 39.06 |  |

## NOTE:

1. To search again using **unmatched masses**, click the symbol .
2. Highly similar protein sequences were given the same rank (click "+" to expand/contract).

**Input Summary****Search id** AFDF20CE-0A5C-B35A163C**Sequences** 20076**Date & Time** Sat Feb 03 18:30:46 2007 UTC (Search Time: 0.44 sec.)**Sample ID****Database** NCBI nr [..\databases\nr]**Taxonomy** Rattus**Mass Range** 32 - 54 kDa**pI Range** 5.9 -7.3**Digestion** Trypsin**Missed Cuts** 1**Modifications** +C2H3ON@C(Complete); +NO2-H@Y(Partial); +O@M(Partial); +CH2N2@K(Complete);**Charge State** MH+**Masses (avg)****Tolerance (avg)** 1.00 ppm

|                     |          |          |          |          |          |          |
|---------------------|----------|----------|----------|----------|----------|----------|
| <b>Masses (mon)</b> | 663.291  | 841.473  | 848.461  | 1063.507 | 1091.541 | 1141.580 |
|                     | 1194.577 | 1211.566 | 1220.596 | 1248.605 | 1265.628 | 1267.628 |
|                     | 1322.660 | 1334.608 | 1572.857 | 1690.890 | 1695.798 | 1713.799 |
|                     | 1751.831 | 1762.831 | 1779.870 | 1874.936 | 1893.907 | 1929.937 |
|                     | 1963.913 | 1971.985 | 1997.968 | 2023.941 | 2024.948 | 2035.963 |
|                     | 2036.965 | 2043.956 | 2044.969 | 2060.950 | 2061.990 | 2070.973 |
|                     | 2098.979 | 2123.996 | 2131.990 | 2150.026 | 2183.063 | 2241.119 |
|                     | 2242.141 | 2298.156 | 2306.105 | 2341.186 | 2350.146 | 2351.155 |
|                     | 2355.151 | 2367.134 | 2368.108 | 2373.127 | 2374.172 | 2382.183 |
|                     | 2383.156 | 2390.161 | 2398.148 | 2399.167 | 2416.151 | 2417.091 |
|                     | 2440.172 | 2441.142 | 2451.198 | 2460.168 | 2468.208 | 2469.204 |
|                     | 2490.141 | 2491.177 | 2497.180 | 2507.201 | 2514.159 | 2516.137 |
|                     | 2535.211 | 2541.268 | 2542.193 | 2548.209 | 2550.179 | 2560.198 |
|                     | 2561.134 | 2574.180 | 2577.155 | 2603.190 | 2637.218 | 2647.155 |
|                     | 2649.208 | 2652.187 | 2653.201 | 2657.244 | 2668.205 | 2669.229 |
|                     | 2676.211 | 2677.210 | 2682.241 | 2683.227 | 2687.215 | 2688.226 |
|                     | 2701.297 | 2702.213 | 2705.238 | 2719.248 | 2720.238 | 2726.223 |
|                     | 2727.255 | 2730.240 | 2731.248 | 2734.260 | 2735.224 | 2748.236 |
|                     | 2749.227 | 2764.265 | 2765.249 | 2778.278 | 2779.278 | 2784.175 |
|                     | 2785.345 | 2788.267 | 2789.247 | 2801.276 | 2802.276 | 2807.244 |
|                     | 2808.256 | 2817.248 | 2818.272 | 2826.289 | 2827.284 | 2835.310 |
|                     | 2836.261 | 2843.288 | 2844.301 | 2850.342 | 2866.254 | 2879.347 |
|                     | 2883.326 | 2884.295 | 2894.310 | 2906.342 | 2914.368 | 2921.309 |
|                     | 2922.329 | 2945.398 | 2946.334 | 2961.315 | 2962.340 | 2971.354 |
|                     | 2972.326 | 2977.321 | 2978.365 | 3002.352 | 3003.349 | 3011.327 |
|                     | 3012.327 | 3018.379 | 3029.404 | 3030.552 | 3048.464 | 3065.420 |
|                     | 3066.338 | 3075.387 | 3076.489 | 3092.281 | 3105.443 | 3111.406 |
|                     | 3112.398 | 3136.415 | 3147.432 | 3148.434 | 3181.469 | 3182.485 |
|                     | 3187.466 | 3191.442 | 3192.455 | 3195.464 | 3196.452 | 3210.462 |
|                     | 3212.473 | 3213.469 | 3230.474 | 3243.457 | 3244.491 | 3265.485 |
|                     | 3266.492 | 3276.478 | 3277.487 | 3281.493 | 3294.503 | 3314.476 |
|                     | 3323.508 | 3324.479 | 3329.524 | 3330.511 | 3356.392 | 3357.479 |
|                     | 3371.430 | 3372.498 | 3384.453 | 3385.492 | 3396.490 | 3397.536 |
|                     | 3407.497 | 3408.483 | 3419.509 | 3420.475 | 3428.571 | 3437.599 |
|                     | 3438.592 | 3446.656 | 3447.556 | 3460.557 | 3461.547 | 3468.520 |
|                     | 3469.513 | 3475.625 | 3481.628 | 3482.524 | 3487.567 | 3497.621 |
|                     | 3509.589 | 3520.591 | 3527.552 | 3534.618 | 3543.642 | 3548.620 |
|                     | 3553.556 | 3570.637 | 3582.625 | 3596.613 | 3600.671 | 3613.661 |
|                     | 3618.619 | 3631.635 | 3635.620 | 3641.688 | 3653.611 | 3665.624 |

|          |          |          |          |          |          |
|----------|----------|----------|----------|----------|----------|
| 3676.625 | 3689.646 | 3696.697 | 3707.653 | 3711.659 | 3726.629 |
| 3740.689 | 3751.689 | 3756.656 | 3767.672 | 3778.717 | 3791.700 |
| 3814.685 | 3825.765 | 3836.662 | 3841.724 | 3849.767 | 3860.684 |
| 3871.671 | 3875.752 | 3881.698 | 3894.646 | 3925.744 | 4216.242 |

**Tolerance** 18.00 ppm  
**(mon)**

**Number of** 258  
**Peptides**

# Laboratory of Mass Spectrometry and Gaseous Ion Chemistry

## PROWL

- ▶ **ProFound**
- ▶ **ProteinInfo**
- ▶ **PeptideMap**
- ▶ **PepFrag**
- ▶ **X! Tandem**
- ▶ **X! Hunter**
- ▶ **GPMDDB**
- ▶ **PROWL Home**
- ▶ **Chait Lab**



The Rockefeller University  
1230 York Avenue,  
New York, NY 10021  
(212) 327-8000



**National Center for  
Research Resources**

National Resource  
for the Mass Spectrometric  
Analysis of Biological  
Macromolecules

## ProFound



### Protein Candidates

| Rank | Expectation           | Protein Information and Sequence Analyse Tools (T)                                                                                   | %  | pI  | kDa   | R |
|------|-----------------------|--------------------------------------------------------------------------------------------------------------------------------------|----|-----|-------|---|
| 1    | 2.1×10 <sup>-12</sup> | gi 54035509 gb AAH83909.1  TNF receptor-associated protein 1 [Rattus norvegicus]                                                     | 32 | 6.6 | 82.61 | ⊙ |
| 2    | 6.8×10 <sup>-12</sup> | gi 20302047 ref NP_620231.1  adenosine monophosphate deaminase 1 (isoform M) [Rattus norvegicus]                                     | 35 | 6.5 | 89.24 | ⊙ |
| 3    | 1.4×10 <sup>-9</sup>  | gi 57528264 ref NP_001009653.1  methylcrotonoyl-Coenzyme A carboxylase 1 (alpha) [Rattus norvegicus]                                 | 42 | 6.7 | 81.36 | ⊙ |
| +4   | 2.7×10 <sup>-9</sup>  | gi 6683035 dbj BAA88997.1  PDE10A3 [Rattus norvegicus]                                                                               | 34 | 6.1 | 92.38 | ⊙ |
|      | -                     | gi 13489075 ref NP_071572.1  phosphodiesterase 10A [Rattus norvegicus]                                                               | 30 | 6.1 | 93.40 | ⊙ |
|      | -                     | gi 42600937 gb AAS21245.1  PDE10A13 [Rattus norvegicus]                                                                              | 31 | 6.3 | 83.86 | ⊙ |
|      | -                     | gi 42600939 gb AAS21246.1  PDE10A14 [Rattus norvegicus]                                                                              | 26 | 6.7 | 76.95 | ⊙ |
| 5    | 4.9×10 <sup>-9</sup>  | gi 13929158 ref NP_114002.1  G protein-coupled receptor kinase interactor 1 [Rattus norvegicus]                                      | 40 | 6.5 | 87.72 | ⊙ |
|      | -                     | gi 6981002 ref NP_037221.1  glycogen synthase 2 [Rattus norvegicus]                                                                  | 36 | 6.5 | 82.81 | ⊙ |
|      | -                     | gi 6685708 sp P97570 PA2G6_RAT 85 kDa calcium-independent phospholipase A2 (iPLA2) (CaI-PLA2) (Group VI phospholipase A2) (GVI PLA2) | 36 | 6.3 | 86.11 | ⊙ |
|      | -                     | gi 29789297 ref NP_445812.1  SH3 domain-containing adapter protein [Rattus norvegicus]                                               | 37 | 6.2 | 76.00 | ⊙ |
|      | -                     | gi 12621082 ref NP_075216.1  midline 1 [Rattus norvegicus]                                                                           | 29 | 6.3 | 78.54 | ⊙ |
|      | -                     | gi 55250418 gb AAH85814.1  Special AT-rich sequence binding protein 1 [Rattus norvegicus]                                            | 24 | 6.1 | 88.10 | ⊙ |
|      | -                     | gi 53733599 gb AAH83876.1  Pleckstrin homology domain containing, family C (with FERM domain) member 1 [Rattus norvegicus]           | 35 | 6.3 | 81.09 | ⊙ |

|   |                                                                                                                               |    |     |       |   |
|---|-------------------------------------------------------------------------------------------------------------------------------|----|-----|-------|---|
| - | gi 42407285 dbj BAD10852.1  TAP-Like isoform C3 [Rattus norvegicus]                                                           | 32 | 6.2 | 77.68 | 🔴 |
| - | gi 13242186 gb AAK16592.1 AF346902_1 glycogen synthase [Rattus norvegicus]                                                    | 36 | 6.6 | 83.06 | 🔴 |
| - | gi 16758678 ref NP_446279.1  procollagen-lysine, 2-oxoglutarate 5-dioxygenase 1 [Rattus norvegicus]                           | 28 | 6.3 | 85.80 | 🔴 |
| - | gi 52695822 pdb 1TLL A Chain A, Crystal Structure Of Rat Neuronal Nitric-Oxide Synthase Reductase Module At 2.3 A Resolution. | 31 | 6.3 | 80.31 | 🔴 |
| - | gi 38512106 gb AAH61756.1  Ribophorin I [Rattus norvegicus]                                                                   | 35 | 6.1 | 70.18 | 🔴 |
| - | gi 6981486 ref NP_037199.1  ribophorin I [Rattus norvegicus]                                                                  | 35 | 6.1 | 70.08 | 🔴 |
| - | gi 16758262 ref NP_445954.1  ATP-binding cassette, sub-family G (WHITE), member 1 [Rattus norvegicus]                         | 28 | 6.7 | 76.18 | 🔴 |
| - | gi 55741823 ref NP_001006977.1  threonyl-tRNA synthetase [Rattus norvegicus]                                                  | 26 | 6.5 | 83.87 | 🔴 |
| - | gi 11560034 ref NP_071574.1  ATP-binding cassette, sub-family B (MDR/TAP), member 9 [Rattus norvegicus]                       | 28 | 7.0 | 85.47 | 🔴 |
| - | gi 42407287 dbj BAD10853.1  TAP-Like isoform C4 [Rattus norvegicus]                                                           | 28 | 6.1 | 79.10 | 🔴 |
| - | gi 1531647 gb AAB40718.1  C2-HC type zinc finger protein r-MyT2 [Rattus norvegicus]                                           | 27 | 7.0 | 94.61 | 🔴 |
| - | gi 9506955 ref NP_062204.1  proprotein convertase subtilisin/kexin type3 [Rattus norvegicus]                                  | 25 | 6.1 | 89.00 | 🔴 |
| - | gi 38197562 gb AAH61791.1  Phosphofructokinase, liver, B-type [Rattus norvegicus]                                             | 23 | 6.9 | 87.63 | 🔴 |
| - | gi 47169484 tpe CAE48379.1  TPA: glutamine-fructose-6-phosphate transaminase 2 [Rattus norvegicus]                            | 40 | 6.7 | 79.61 | 🔴 |
| - | gi 13929146 ref NP_113996.1  calpain 6 [Rattus norvegicus]                                                                    | 33 | 6.9 | 77.18 | 🔴 |
| - | gi 18034779 ref NP_542144.1  nuclear protein localization 4 [Rattus norvegicus]                                               | 40 | 6.0 | 70.56 | 🔴 |
| - | gi 13591987 ref NP_112314.1  mitochondrial intermediate peptidase [Rattus norvegicus]                                         | 31 | 6.1 | 83.07 | 🔴 |

|   |                                                                                                                                                                                                             |    |     |       |   |
|---|-------------------------------------------------------------------------------------------------------------------------------------------------------------------------------------------------------------|----|-----|-------|---|
| - | gi 13786188 ref NP_112637.1  peroxisome proliferative activated receptor, gamma, coactivator 1 alpha [Rattus norvegicus]                                                                                    | 31 | 6.1 | 93.92 | 🔴 |
| - | gi 12083643 ref NP_073182.1  exocyst complex component 7 [Rattus norvegicus]                                                                                                                                | 30 | 6.3 | 77.53 | 🔴 |
| - | gi 6978671 ref NP_037060.1  cyclic nucleotide gated channel 4 [Rattus norvegicus]                                                                                                                           | 26 | 6.3 | 78.51 | 🔴 |
| - | gi 16758638 ref NP_446249.1  crooked neck protein [Rattus norvegicus]                                                                                                                                       | 23 | 6.5 | 86.25 | 🔴 |
| - | gi 53733406 gb AAH83567.1  Ring finger protein 190 [Rattus norvegicus]                                                                                                                                      | 29 | 6.8 | 90.54 | 🔴 |
| - | gi 23305781 gb AAN17280.1  testicular angiotensin-1 converting enzyme [Rattus norvegicus]                                                                                                                   | 26 | 6.6 | 90.42 | 🔴 |
| - | gi 47059181 ref NP_997631.1  B-factor, properdin [Rattus norvegicus]                                                                                                                                        | 27 | 6.6 | 88.83 | 🔴 |
| - | gi 1083665 pir  S51635 fibroblast growth factor receptor 2b, keratinocyte growth factor receptor - rat                                                                                                      | 30 | 6.5 | 82.10 | 🔴 |
| - | gi 49359177 gb AAT65503.1  protein kinase C epsilon [Rattus norvegicus]                                                                                                                                     | 21 | 6.6 | 87.28 | 🔴 |
| - | gi 204158 gb AAA41168.1  fibronectin 3                                                                                                                                                                      | 32 | 6.4 | 77.14 | 🔴 |
| - | gi 204157 gb AAA41167.1  fibronectin 2                                                                                                                                                                      | 28 | 6.4 | 87.73 | 🔴 |
| - | gi 204156 gb AAA41166.1  fibronectin 1                                                                                                                                                                      | 27 | 6.1 | 90.44 | 🔴 |
| - | gi 13929022 ref NP_113915.1  LIM motif-containing protein kinase 1 [Rattus norvegicus]                                                                                                                      | 29 | 6.4 | 75.39 | 🔴 |
| - | gi 1209468 emb CAA63043.1  stat5bDelta40C [Rattus norvegicus]                                                                                                                                               | 27 | 6.4 | 85.37 | 🔴 |
| - | gi 25742638 ref NP_114012.1  CCCTC-binding factor [Rattus norvegicus]                                                                                                                                       | 22 | 6.5 | 88.13 | 🔴 |
| - | gi 38257802 sp P59996 PCSK9_RAT Proprotein convertase subtilisin/kexin type 9 precursor (Proprotein convertase PC9) (Subtilisin/kexin-like protease PC9) (Neural apoptosis-regulated convertase 1) (NARC-1) | 25 | 6.5 | 76.92 | 🔴 |
| - | gi 551274 emb CAA84511.1  fibroblast growth factor receptor 2b, keratinocyte growth factor receptor [Rattus rattus]                                                                                         | 28 | 6.8 | 78.33 | 🔴 |

## NOTE:

1. To search again using **unmatched masses**, click the symbol .
2. Highly similar protein sequences were given the same rank (click "+" to expand/contract).

**Input Summary****Search id** A936FEEE-1108-59511F76**Sequences** 20092**Date & Time** Wed Jan 31 19:37:46 2007 UTC (Search Time: 0.47 sec.)**Sample ID****Database** NCBI nr [..\databases\nr]**Taxonomy** Rattus**Mass Range** 69 - 95 kDa**pI Range** 6.0 -7.1**Digestion** Trypsin**Missed Cuts** 1**Modifications** +C2H3ON@C(Complete); +O@M(Partial); +HPO3@STY  
(Partial); +CH2N2@K(Complete);**Charge State** MH+**Masses (avg)****Tolerance (avg)** 1.00 ppm

**Masses (mon)** 664.341 791.404 823.439 849.421 991.512 1017.490 1046.498  
 1063.500 1113.594 1220.599 1223.605 1226.594 1265.630  
 1267.615 1315.598 1330.598 1529.736 1560.774 1602.790  
 1632.749 1639.734 1642.766 1653.744 1695.785 1713.799  
 1752.842 1757.852 1766.820 1779.858 1794.843 1808.833  
 1824.835 1837.850 1856.848 1893.872 1904.802 1931.903  
 1935.883 1948.921 1953.900 1962.902 1965.914 1981.919  
 2019.929 2020.940 2038.962 2039.960 2044.946 2045.943  
 2050.952 2051.960 2062.974 2070.983 2096.964 2124.021  
 2167.052 2180.048 2181.044 2209.082 2276.132 2314.124  
 2315.105 2349.156 2350.144 2366.163 2367.167 2377.168  
 2378.180 2381.141 2382.162 2392.209 2397.145 2398.159  
 2408.127 2420.162 2435.209 2450.173 2460.158 2465.200  
 2466.187 2483.209 2493.172 2494.174 2504.158 2505.090  
 2516.183 2535.207 2536.173 2549.182 2550.167 2554.170





|          |          |          |          |          |          |
|----------|----------|----------|----------|----------|----------|
| 2555.176 | 2560.194 | 2561.171 | 2567.183 | 2568.208 | 2586.230 |
| 2593.178 | 2601.209 | 2602.218 | 2605.200 | 2606.188 | 2610.184 |
| 2611.243 | 2634.175 | 2635.188 | 2649.225 | 2650.214 | 2666.224 |
| 2667.221 | 2673.260 | 2674.204 | 2689.223 | 2690.218 | 2714.240 |
| 2715.263 | 2723.219 | 2724.219 | 2731.211 | 2732.244 | 2742.264 |
| 2743.247 | 2747.233 | 2748.239 | 2752.271 | 2762.253 | 2763.237 |
| 2771.277 | 2772.268 | 2786.302 | 2787.267 | 2805.265 | 2818.283 |
| 2819.269 | 2836.285 | 2837.287 | 2847.283 | 2849.295 | 2866.328 |
| 2882.327 | 2887.337 | 2894.244 | 2895.328 | 2906.353 | 2914.348 |
| 2922.358 | 2949.331 | 2953.338 | 2954.339 | 2963.306 | 2964.328 |
| 2978.319 | 2980.316 | 3000.434 | 3001.422 | 3012.319 | 3020.376 |
| 3029.458 | 3047.471 | 3052.331 | 3053.338 | 3060.376 | 3061.393 |
| 3068.359 | 3069.335 | 3075.380 | 3083.350 | 3084.344 | 3092.396 |
| 3102.383 | 3103.401 | 3111.372 | 3112.357 | 3134.415 | 3135.412 |
| 3154.412 | 3172.464 | 3173.422 | 3182.450 | 3183.435 | 3187.445 |
| 3198.464 | 3208.429 | 3220.470 | 3230.483 | 3244.472 | 3245.462 |
| 3262.497 | 3266.415 | 3267.448 | 3276.467 | 3277.475 | 3281.485 |
| 3292.503 | 3314.488 | 3326.496 | 3327.520 | 3342.521 | 3355.521 |
| 3356.456 | 3372.534 | 3373.491 | 3383.491 | 3384.516 | 3393.548 |
| 3409.532 | 3419.547 | 3423.431 | 3424.490 | 3430.553 | 3433.574 |
| 3434.550 | 3444.501 | 3445.523 | 3452.554 | 3463.519 | 3464.578 |
| 3470.560 | 3471.571 | 3478.517 | 3479.542 | 3490.668 | 3491.517 |
| 3507.569 | 3526.564 | 3532.583 | 3539.609 | 3546.639 | 3553.619 |
| 3566.602 | 3574.608 | 3583.650 | 3594.673 | 3601.594 | 3614.616 |
| 3620.628 | 3635.621 | 3648.645 | 3653.599 | 3666.648 | 3677.609 |
| 3695.652 | 3710.667 | 3724.682 | 3741.708 | 3753.661 | 3774.662 |
| 3784.705 | 3799.721 | 3815.737 | 3831.691 | 3843.726 | 3860.704 |
| 3877.754 | 4113.796 |          |          |          |          |

**Tolerance** 26.00 ppm  
**(mon)**

**Number of** 255  
**Peptides**

# Laboratory of Mass Spectrometry and Gaseous Ion Chemistry

## PROWL

- **ProFound**
- **ProteinInfo**
- **PeptideMap**
- **PepFrag**
- **X! Tandem**
- **X! Hunter**
- **GPMDDB**
- **PROWL Home**
- **Chait Lab**

## ProFound



### Protein Candidates

| Rank | Expectation          | Protein Information and Sequence Analyse Tools (T)                                                    | %  | pI  | kDa   | R |
|------|----------------------|-------------------------------------------------------------------------------------------------------|----|-----|-------|---|
| 1    | 3.7×10 <sup>-8</sup> | gi 48927601 dbj BAD23895.1  Down-regulated in nephrectomized rat kidney #2 [Rattus norvegicus]        | 31 | 6.2 | 68.99 | ⊙ |
| +2   | 6.9×10 <sup>-7</sup> | gi 204576 gb AAA41312.1  tyrosine kinase                                                              | 31 | 6.8 | 59.02 | ⊙ |
| -    | -                    | gi 34734058 ref NP_037317.2  hemopoietic cell kinase [Rattus norvegicus]                              | 30 | 7.2 | 61.27 | ⊙ |
| -    | -                    | gi 57582 emb CAA44218.1  protein-tyrosine kinase [Rattus rattus]                                      | 26 | 6.8 | 58.95 | ⊙ |
| -    | -                    | gi 349096 gb AAA42095.1  transcription factor                                                         | 41 | 7.0 | 57.21 | ⊙ |
| -    | -                    | gi 693993 emb CAA58537.1  leucocyte common antigen-related protein [Rattus norvegicus]                | 35 | 6.5 | 72.71 | ⊙ |
| -    | -                    | gi 16758070 ref NP_445802.1  alkyl-dihydroxyacetonephosphate synthase precursor [Rattus norvegicus]   | 35 | 7.0 | 73.87 | ⊙ |
| -    | -                    | gi 91940 pir  S00289 alkaline phosphatase (EC 3.1.3.1), hepatic precursor - rat                       | 32 | 6.3 | 59.51 | ⊙ |
| -    | -                    | gi 51980290 gb AAH81791.1  Leucine rich repeat protein 3, neuronal [Rattus norvegicus]                | 28 | 6.8 | 81.74 | ⊙ |
| -    | -                    | gi 117230 sp P20814 CP2CD_RAT Cytochrome P450 2C13, male-specific (CYP11C13) (P450-G) (P-450g) (UT-5) | 35 | 6.8 | 57.70 | ⊙ |
| -    | -                    | gi 37727814 gb AAO45419.1  EG1RVC [Rattus norvegicus]                                                 | 31 | 6.2 | 79.94 | ⊙ |
| -    | -                    | gi 25453406 ref NP_612523.1  cytochrome P450 2c13 [Rattus norvegicus]                                 | 38 | 6.7 | 57.68 | ⊙ |
| -    | -                    | gi 11890719 gb AAG41192.1  inhibitor of apoptosis protein 3 [Rattus norvegicus]                       | 25 | 6.1 | 58.96 | ⊙ |
| -    | -                    | gi 458333 gb AAA19133.1  protein tyrosine phosphatase                                                 | 31 | 6.9 | 70.80 | ⊙ |



The Rockefeller University  
1230 York Avenue,  
New York, NY 10021  
(212) 327-8000



**National Center for  
Research Resources**

National Resource  
for the Mass Spectrometric  
Analysis of Biological  
Macromolecules

|   |                                                                                                                                                         |    |     |       |   |
|---|---------------------------------------------------------------------------------------------------------------------------------------------------------|----|-----|-------|---|
| - | gi 13540675 ref NP_110483.1  leucine rich repeat protein 3, neuronal [Rattus norvegicus]                                                                | 23 | 6.7 | 81.80 | 🔴 |
| - | gi 55741778 ref NP_001006998.1  sphingomyelin phosphodiesterase 1, acid lysosomal [Rattus norvegicus]                                                   | 29 | 7.1 | 71.51 | 🔴 |
| - | gi 50927382 gb AAH79245.1  Similar to RIKEN cDNA 3010001K23 gene [Rattus norvegicus]                                                                    | 25 | 6.6 | 56.78 | 🔴 |
| - | gi 2117406 pir  I52410 cytochrome P450 IIC13 - rat                                                                                                      | 32 | 6.7 | 57.70 | 🔴 |
| - | gi 13592023 ref NP_112343.1  3-phosphoinositide dependent protein kinase-1 [Rattus norvegicus]                                                          | 31 | 6.7 | 65.76 | 🔴 |
| - | gi 56905 emb CAA30916.1  unnamed protein product [Rattus norvegicus]                                                                                    | 28 | 6.4 | 59.12 | 🔴 |
| - | gi 11890721 gb AAG41193.1  inhibitor of apoptosis protein 3 [Rattus norvegicus]                                                                         | 20 | 6.1 | 58.99 | 🔴 |
| - | gi 10765281 gb AAG22969.1 AF183429_1 inhibitor of apoptosis protein 3 [Rattus norvegicus]                                                               | 20 | 6.1 | 58.47 | 🔴 |
| - | gi 11560028 ref NP_071567.1  baculoviral IAP repeat-containing 4 [Rattus norvegicus]                                                                    | 20 | 6.1 | 58.43 | 🔴 |
| - | gi 56611129 gb AAH87741.1  Glucosamine (N-acetyl)-6-sulfatase [Rattus norvegicus]                                                                       | 23 | 6.3 | 59.72 | 🔴 |
| - | gi 6981444 ref NP_037220.1  protein tyrosine phosphatase, non-receptor type 11 [Rattus norvegicus]                                                      | 27 | 6.9 | 70.48 | 🔴 |
| - | gi 6978607 ref NP_036652.1  catalase [Rattus norvegicus]                                                                                                | 35 | 7.1 | 61.34 | 🔴 |
| - | gi 29293813 ref NP_808789.1  pre-B-cell colony enhancing factor 1 [Rattus norvegicus]                                                                   | 30 | 6.7 | 57.64 | 🔴 |
| - | gi 7434494 pir  S77704 6-phosphofructo-2-kinase (EC 2.7.1.105) / fructose-2, 6-bisphosphate 2-phosphatase (EC 3.1.3.46) clone 5c, skeletal muscle - rat | 19 | 6.4 | 56.01 | 🔴 |
| - | gi 125552 sp P05696 KPCA_RAT Protein kinase C alpha type (PKC-alpha) (PKC-A)                                                                            | 27 | 6.6 | 80.40 | 🔴 |
| - | gi 34880864 ref XP_222803.2  PREDICTED: similar to zinc finger and BTB domain containing 37 [Rattus norvegicus]                                         | 25 | 6.2 | 57.46 | 🔴 |
| - | gi 55154558 gb AAH85333.1  Coiled-coil domain containing 67 [Rattus norvegicus]                                                                         | 22 | 6.6 | 70.56 | 🔴 |

|   |                                                                                                                                   |    |     |       |  |
|---|-----------------------------------------------------------------------------------------------------------------------------------|----|-----|-------|--|
| - | <a href="#">gi 12711692 ref NP_075412.1 </a> dihydropyrimidinase-like 5 [Rattus norvegicus]                                       | 18 | 6.6 | 63.40 |  |
| - | <a href="#">gi 56971844 gb AAH88305.1 </a> Protein disulfide isomerase-associated 5 [Rattus norvegicus]                           | 21 | 7.0 | 62.23 |  |
| - | <a href="#">gi 6978747 ref NP_036862.1 </a> cytochrome P450, family 2, subfamily d, polypeptide 26 [Rattus norvegicus]            | 19 | 6.8 | 57.90 |  |
| - | <a href="#">gi 117242 sp P10634 CP2DQ_RAT</a> Cytochrome P450 2D26 (CYPIID26) (P450-DB2) (P450-CMF2) (Debrisoquine 4-hydroxylase) | 19 | 7.0 | 57.90 |  |
| - | <a href="#">gi 19343354 gb AAB88700.2 </a> kinesin-related protein 3A [Rattus norvegicus]                                         | 27 | 6.1 | 57.15 |  |
| - | <a href="#">gi 6714522 dbj BAA89475.1 </a> dihydropyrimidinase-related protein [Rattus norvegicus]                                | 25 | 6.5 | 63.15 |  |

## NOTE:

1. To search again using **unmatched masses**, click the symbol .
2. Highly similar protein sequences were given the same rank (click "+" to expand/contract).

**Input Summary****Search id** B4B7FA09-0584-B5806257**Sequences** 20076**Date & Time** Sat Feb 03 03:24:35 2007 UTC (Search Time: 0.44 sec.)**Sample ID****Database** NCBI nr [..\databases\nr]**Taxonomy** Rattus**Mass Range** 56 - 83 kDa**pI Range** 6.1 -7.2**Digestion** Trypsin**Missed Cuts** 1**Modifications** +C2H3ON@C(Complete); +O@M(Partial); +HPO3@STY (Partial); +CH2N2@K(Complete);**Charge State** MH+**Masses (avg)**

**Tolerance (avg)** 1.00 ppm

**Masses (mon)** 664.338 841.473 848.449 902.469 1030.501 1064.517

|          |          |          |          |          |          |
|----------|----------|----------|----------|----------|----------|
| 1194.579 | 1211.578 | 1223.602 | 1247.612 | 1280.634 | 1289.609 |
| 1322.669 | 1330.605 | 1895.870 | 1904.886 | 1908.898 | 1932.901 |
| 2012.947 | 2017.928 | 2018.931 | 2023.944 | 2036.952 | 2037.952 |
| 2115.981 | 2124.004 | 2135.019 | 2150.016 | 2183.073 | 2225.110 |
| 2241.122 | 2242.145 | 2291.143 | 2298.140 | 2306.139 | 2348.139 |
| 2349.130 | 2367.115 | 2368.106 | 2373.147 | 2374.160 | 2376.168 |
| 2377.174 | 2390.151 | 2397.140 | 2398.148 | 2433.160 | 2448.187 |
| 2458.164 | 2464.186 | 2465.213 | 2497.202 | 2505.187 | 2514.161 |
| 2533.181 | 2534.175 | 2541.189 | 2542.189 | 2554.191 | 2555.194 |
| 2560.207 | 2561.208 | 2574.185 | 2593.188 | 2602.218 | 2603.213 |
| 2637.224 | 2638.221 | 2647.211 | 2649.229 | 2652.213 | 2653.220 |
| 2663.221 | 2680.225 | 2681.239 | 2690.236 | 2701.238 | 2702.233 |
| 2723.250 | 2732.249 | 2733.254 | 2743.252 | 2744.249 | 2749.270 |
| 2750.265 | 2765.263 | 2766.261 | 2783.286 | 2784.287 | 2787.250 |
| 2788.263 | 2792.255 | 2793.254 | 2801.277 | 2802.301 | 2806.291 |
| 2807.276 | 2819.293 | 2820.310 | 2832.287 | 2837.302 | 2838.294 |
| 2848.306 | 2849.313 | 2868.351 | 2885.322 | 2886.328 | 2894.348 |
| 2895.337 | 2906.333 | 2920.354 | 2921.331 | 2944.343 | 2945.340 |
| 2959.346 | 2960.361 | 2964.346 | 2965.330 | 2978.362 | 2979.355 |
| 2985.380 | 2986.389 | 2995.374 | 2996.379 | 3002.394 | 3003.391 |
| 3012.432 | 3018.384 | 3029.465 | 3030.531 | 3048.486 | 3064.423 |
| 3065.415 | 3075.417 | 3076.436 | 3092.434 | 3107.444 | 3136.419 |
| 3147.446 | 3148.485 | 3179.443 | 3180.465 | 3191.457 | 3192.451 |
| 3196.442 | 3210.462 | 3228.475 | 3232.498 | 3233.488 | 3244.508 |
| 3245.504 | 3262.510 | 3273.520 | 3283.523 | 3294.494 | 3316.504 |
| 3327.540 | 3328.561 | 3337.566 | 3338.564 | 3342.514 | 3356.565 |
| 3357.538 | 3368.596 | 3382.544 | 3391.551 | 3402.564 | 3403.554 |
| 3417.496 | 3418.516 | 3432.566 | 3433.559 | 3441.529 | 3442.556 |
| 3447.540 | 3448.551 | 3455.578 | 3465.561 | 3470.531 | 3471.546 |
| 3489.597 | 3494.597 | 3495.569 | 3510.597 | 3517.599 | 3526.610 |
| 3534.614 | 3545.624 | 3551.615 | 3565.636 | 3577.615 | 3587.635 |
| 3595.643 | 3603.651 | 3614.657 | 3632.665 | 3638.649 | 3649.666 |
| 3661.645 | 3677.632 | 3681.690 | 3692.642 | 3708.671 | 3721.653 |
| 3727.671 | 3739.684 | 3751.699 | 3756.698 | 3762.694 | 3776.689 |
| 3781.668 | 3794.692 | 3814.726 | 3826.743 | 3835.720 | 3843.704 |
| 4055.855 | 4084.834 | 4096.941 | 4107.760 | 4127.896 | 4149.951 |
| 4158.885 | 4187.870 | 4198.890 | 4216.711 | 4229.937 | 4255.002 |

4457.620 4474.910 4500.772 4517.695

**Tolerance** 18.00 ppm  
**(mon)**

**Number of** 232  
**Peptides**



# Laboratory of Mass Spectrometry and Gaseous Ion Chemistry

## PROWL

- **ProFound**
- **ProteinInfo**
- **PeptideMap**
- **PepFrag**
- **X! Tandem**
- **X! Hunter**
- **GPMDDB**
- **PROWL Home**
- **Chait Lab**

## ProFound



### Protein Candidates

| Rank | Expectation          | Protein Information and Sequence Analyse Tools (T)                                                                                    | %  | pI  | kDa   | R |
|------|----------------------|---------------------------------------------------------------------------------------------------------------------------------------|----|-----|-------|---|
| 1    | 6.6×10 <sup>-5</sup> | gi 13929146 ref NP_113996.1  calpain 6 [Rattus norvegicus]                                                                            | 12 | 6.9 | 77.18 | ⊙ |
| +2   | 6.3×10 <sup>-3</sup> | gi 13242186 gb AAK16592.1 AF346902_1 glycogen synthase [Rattus norvegicus]                                                            | 9  | 6.6 | 83.06 | ⊙ |
|      | -                    | gi 6981002 ref NP_037221.1  glycogen synthase 2 [Rattus norvegicus]                                                                   | 6  | 6.5 | 82.81 | ⊙ |
| 3    | 7.8×10 <sup>-3</sup> | gi 50233797 ref NP_899162.1  keratin 5 (epidermolysis bullosa simplex, Dowling-Meara/Kobner/Weber-Cockayne types) [Rattus norvegicus] | 11 | 6.9 | 63.22 | ⊙ |
| 4    | 0.14                 | gi 16758432 ref NP_446077.1  G elongation factor [Rattus norvegicus]                                                                  | 6  | 7.0 | 86.48 | ⊙ |

### NOTE:

1. To search again using **unmatched masses**, click the symbol ⊙.
2. Highly similar protein sequences were given the same rank (click "+" to expand/contract).

### Input Summary

**Search id** A2BFF966-177C-A3887EC6

**Sequences** 20076

**Date & Time** Sat Feb 03 02:10:38 2007 UTC (Search Time: 0.34 sec.)

**Sample ID**

**Database** NCBI nr [..\databases\nr]

**Taxonomy** Rattus

**Mass Range** 63 - 94 kDa

**pI Range** 6.5 - 7.5

**Digestion** Trypsin



The Rockefeller University  
1230 York Avenue,  
New York, NY 10021  
(212) 327-8000



**National Center for  
Research Resources**

National Resource  
for the Mass Spectrometric  
Analysis of Biological  
Macromolecules

**Missed Cuts 1****Modifications** +C2H3ON@C(Complete); +O@M(Partial); +CH2N2@K(Complete);**Charge State** MH+**Masses (avg)****Tolerance (avg)** 1.00 ppm

**Masses (mon)** 664.342 791.414 823.439 991.520 1046.505 1063.513  
1091.541 1113.594 1193.573 1211.587 1220.599 1224.589  
1233.639 1241.688 1248.605 1262.621 1280.629 1291.617  
1310.631 1323.655 1330.599 1333.641 1456.704 1529.740  
1542.761 1560.774 1602.797 1779.860 1808.826 1894.875  
1904.806 2191.078 2209.099 2225.110 2291.145 2315.114  
2316.123 2364.145 2365.161 2380.166 2381.158 2392.198  
2397.162 2398.163 2408.139 2419.163 2420.164 2435.196  
2460.165 2466.177 2467.210 2483.208 2484.207 2504.119  
2535.171 2536.187 2562.194 2593.174 2610.191 2632.151  
2633.156 2650.213 2674.189 2691.215 2692.198 2723.225  
2787.254 3052.335 3053.308 3060.388 3061.388 3068.358  
3069.334 3077.412 3084.354 3085.342 3092.396 3102.395  
3103.398 3111.369 3112.346 3134.402 3135.406 3172.436  
3173.425 3210.461 3220.460 3230.495 3265.506 3266.486  
3277.473 3283.488 3292.487 3316.498 3329.524 3331.519  
3337.438 3338.513 3345.398 3346.504 3353.506 3354.498  
3372.487 3373.509 3384.525 3396.453 3398.485 3416.520  
3518.623 3635.598 3651.597 3666.633 3677.679 3683.612  
3693.624 3708.755 3744.653 3758.694 3800.643

**Tolerance** 12.00 ppm**(mon)****Number of** 119**Peptides**



PROWL

- [ProFound](#)
- [ProteinInfo](#)
- [PeptideMap](#)
- [PepFrag](#)
- [X! Tandem](#)
- [X! Hunter](#)
- [GPMDB](#)
- [PROWL Home](#)
- [Chait Lab](#)

The Rockefeller  
University

The Rockefeller University  
1230 York Avenue,  
New York, NY 10021  
(212) 327-8000

National Center of  
Research Resources

National Resource  
for the Mass Spectrometric  
Analysis of Biological  
Macromolecules

## ProFound

### Protein Candidates

| Rank | Expectation           | Protein Information and Sequence Analyse Tools (T)                                                                                             | %                  | pI  | kDa   | R                        |
|------|-----------------------|------------------------------------------------------------------------------------------------------------------------------------------------|--------------------|-----|-------|--------------------------|
| +1   | 7.7×10 <sup>-30</sup> | <a href="#">gi 13786202 ref NP_112644.1 </a> voltage-dependent anion channel 2 [Rattus norvegicus]                                             | <a href="#">15</a> | 7.7 | 33.32 | <input type="checkbox"/> |
|      | -                     | <a href="#">gi 299036 gb AAB26053.1 </a> B-36 VDAC=36 kda voltage dependent anion channel [rats, hippocampus, Peptide, 295 aa]                 | <a href="#">15</a> | 7.7 | 33.30 | <input type="checkbox"/> |
| 2    | 4.7×10 <sup>-14</sup> | <a href="#">gi 1934603 gb AAB51724.1 </a> RN protein [Rattus norvegicus]                                                                       | <a href="#">15</a> | 6.1 | 39.40 | <input type="checkbox"/> |
| +3   | 2.9×10 <sup>-12</sup> | <a href="#">gi 9845234 ref NP_063970.1 </a> annexin A2 [Rattus norvegicus]                                                                     | <a href="#">9</a>  | 7.7 | 40.33 | <input type="checkbox"/> |
|      | -                     | <a href="#">gi 2143593 pir S55277</a> annexin II - rat                                                                                         | <a href="#">9</a>  | 8.3 | 40.63 | <input type="checkbox"/> |
|      | -                     | <a href="#">gi 9247201 gb AAB31934.2 </a> annexin II [Rattus sp.]                                                                              | <a href="#">9</a>  | 8.3 | 40.42 | <input type="checkbox"/> |
| 4    | 1.1×10 <sup>-11</sup> | <a href="#">gi 13027414 ref NP_076454.1 </a> glyceraldehyde-3-phosphate dehydrogenase, spermatogenic [Rattus norvegicus]                       | <a href="#">13</a> | 8.7 | 48.43 | <input type="checkbox"/> |
| 5    | 2.1×10 <sup>-9</sup>  | <a href="#">gi 27462661 gb AAO15540.1 AF459022_1</a> ZAKI-4 alpha [Rattus norvegicus]                                                          | <a href="#">29</a> | 6.2 | 22.83 | <input type="checkbox"/> |
| 6    | 2.3×10 <sup>-8</sup>  | <a href="#">gi 56605708 ref NP_001008315.1 </a> makorin, ring finger protein, 2 [Rattus norvegicus]                                            | <a href="#">11</a> | 7.3 | 49.32 | <input type="checkbox"/> |
| 7    | 5.7×10 <sup>-8</sup>  | <a href="#">gi 47577209 ref NP_001000754.1 </a> olfactory receptor Olr363 [Rattus norvegicus]                                                  | <a href="#">17</a> | 7.9 | 36.18 | <input type="checkbox"/> |
| 8    | 9.3×10 <sup>-8</sup>  | <a href="#">gi 11693160 ref NP_071785.1 </a> quinoid dihydropteridine reductase [Rattus norvegicus]                                            | <a href="#">21</a> | 7.9 | 26.39 | <input type="checkbox"/> |
| 9    | 1.2×10 <sup>-7</sup>  | <a href="#">gi 47576063 ref NP_001000007.1 </a> olfactory receptor Olr1422 [Rattus norvegicus]                                                 | <a href="#">16</a> | 8.7 | 36.17 | <input type="checkbox"/> |
| 10   | 2.4×10 <sup>-7</sup>  | <a href="#">gi 16758274 ref NP_445964.1 </a> peroxiredoxin 4 [Rattus norvegicus]                                                               | <a href="#">14</a> | 6.2 | 31.89 | <input type="checkbox"/> |
| 11   | 3.1×10 <sup>-7</sup>  | <a href="#">gi 34932585 ref XP_214526.2 </a> PREDICTED: similar to zinc binding alcohol dehydrogenase, domain containing 2 [Rattus norvegicus] | <a href="#">12</a> | 7.8 | 41.63 | <input type="checkbox"/> |
| 12   | 3.4×10 <sup>-7</sup>  | <a href="#">gi 22652804 gb AAN03824.1 </a> aldehyde reductase AFAR2 subunit [Rattus norvegicus]                                                | <a href="#">8</a>  | 7.9 | 41.63 | <input type="checkbox"/> |
| 13   | 4.5×10 <sup>-7</sup>  | <a href="#">gi 34881169 ref XP_223005.2 </a> PREDICTED: similar to degenerative spermatocyte homolog 1 [Rattus norvegicus]                     | <a href="#">13</a> | 7.9 | 38.83 | <input type="checkbox"/> |
| 14   | 4.7×10 <sup>-7</sup>  | <a href="#">gi 47576395 ref NP_001000046.1 </a> olfactory receptor Olr1563 [Rattus norvegicus]                                                 | <a href="#">18</a> | 8.8 | 36.57 | <input type="checkbox"/> |
| 15   | 2.4×10 <sup>-6</sup>  | <a href="#">gi 6166481 gb AAF04850.1 </a> claudin-1 [Rattus norvegicus]                                                                        | <a href="#">7</a>  | 7.8 | 23.55 | <input type="checkbox"/> |
| 16   | 5.5×10 <sup>-6</sup>  | <a href="#">gi 226008 prf 1405343A</a> phosphorylase kinase gamma                                                                              | <a href="#">7</a>  | 6.1 | 46.33 | <input type="checkbox"/> |

|    |                      |                                                                                                                                                                       |                    |     |       |                          |
|----|----------------------|-----------------------------------------------------------------------------------------------------------------------------------------------------------------------|--------------------|-----|-------|--------------------------|
| 17 | 5.5×10 <sup>-6</sup> | <a href="#">gi 13928776 ref NP_113761.1 </a> phosphorylase kinase, gamma 1 [Rattus norvegicus]                                                                        | <a href="#">7</a>  | 6.1 | 46.46 | <input type="checkbox"/> |
| 18 | 6.9×10 <sup>-6</sup> | <a href="#">gi 6689099 emb CAB65388.1 </a> MASP-2 protein [Rattus norvegicus]                                                                                         | <a href="#">4</a>  | 6.2 | 41.57 | <input type="checkbox"/> |
| 19 | 8.8×10 <sup>-6</sup> | <a href="#">gi 47168545 pdb 1PK8 A</a> Chain A, Crystal Structure Of Rat Synapsin I C Domain Complexed To Ca.Atp                                                      | <a href="#">10</a> | 7.9 | 46.65 | <input type="checkbox"/> |
| 20 | 1.2×10 <sup>-5</sup> | <a href="#">gi 27689567 ref XP_213467.1 </a> PREDICTED: similar to CG15735-PA [Rattus norvegicus]                                                                     | <a href="#">15</a> | 7.8 | 22.68 | <input type="checkbox"/> |
| 21 | 1.7×10 <sup>-5</sup> | <a href="#">gi 1134884 emb CAA62607.1 </a> ligand gated ATP receptor [Rattus norvegicus]                                                                              | <a href="#">6</a>  | 8.4 | 45.26 | <input type="checkbox"/> |
| 22 | 1.7×10 <sup>-5</sup> | <a href="#">gi 1709521 sp P51577 P2RX4_RAT</a> P2X purinoceptor 4 (ATP receptor) (P2X4) (Purinergetic receptor)                                                       | <a href="#">6</a>  | 8.4 | 45.25 | <input type="checkbox"/> |
| 23 | 1.7×10 <sup>-5</sup> | <a href="#">gi 13928806 ref NP_113782.1 </a> purinergetic receptor P2X4 [Rattus norvegicus]                                                                           | <a href="#">6</a>  | 8.7 | 45.18 | <input type="checkbox"/> |
| 24 | 2.0×10 <sup>-5</sup> | <a href="#">gi 56090628 ref NP_001007667.1 </a> BCS1-like [Rattus norvegicus]                                                                                         | <a href="#">4</a>  | 8.5 | 48.09 | <input type="checkbox"/> |
| 25 | 2.0×10 <sup>-5</sup> | <a href="#">gi 1161345 gb AAC52380.1 </a> P2X4 ATP-gated channel subunit                                                                                              | <a href="#">6</a>  | 8.7 | 45.33 | <input type="checkbox"/> |
| 26 | 3.0×10 <sup>-5</sup> | <a href="#">gi 14389301 ref NP_112650.1 </a> sphingomyelin phosphodiesterase 2, neutral [Rattus norvegicus]                                                           | <a href="#">7</a>  | 6.6 | 49.42 | <input type="checkbox"/> |
| 27 | 3.8×10 <sup>-5</sup> | <a href="#">gi 51260852 gb AAH79474.1 </a> Mamdc2 protein [Rattus norvegicus]                                                                                         | <a href="#">14</a> | 6.2 | 28.89 | <input type="checkbox"/> |
| 28 | 7.8×10 <sup>-5</sup> | <a href="#">gi 22219456 ref NP_671746.1 </a> alpha-2u globulin PGCL5 [Rattus norvegicus]                                                                              | <a href="#">15</a> | 6.1 | 21.76 | <input type="checkbox"/> |
| 29 | 3.8×10 <sup>-4</sup> | <a href="#">gi 27702700 ref XP_215785.1 </a> PREDICTED: similar to APAF1 interacting protein [Rattus norvegicus]                                                      | <a href="#">15</a> | 6.5 | 28.32 | <input type="checkbox"/> |
| 30 | 8.4×10 <sup>-4</sup> | <a href="#">gi 2851469 sp P38406 GNAL_RAT</a> Guanine nucleotide-binding protein G(olf) subunit alpha (Adenylate cyclase-stimulating G alpha protein, olfactory type) | <a href="#">6</a>  | 6.2 | 45.92 | <input type="checkbox"/> |
| 31 | 8.4×10 <sup>-4</sup> | <a href="#">gi 235879 gb AAB19866.1 </a> lipocortin I [Rattus sp.]                                                                                                    | <a href="#">5</a>  | 7.0 | 40.45 | <input type="checkbox"/> |
| 32 | 8.4×10 <sup>-4</sup> | <a href="#">gi 6978501 ref NP_037036.1 </a> annexin 1 [Rattus norvegicus]                                                                                             | <a href="#">5</a>  | 7.0 | 40.46 | <input type="checkbox"/> |
| 33 | 9.2×10 <sup>-4</sup> | <a href="#">gi 5669929 gb AAD46521.1 AF154914_1</a> cyclin H [Rattus norvegicus]                                                                                      | <a href="#">10</a> | 7.1 | 39.10 | <input type="checkbox"/> |
| 34 | 1.1×10 <sup>-3</sup> | <a href="#">gi 19865045 sp Q9R1A0 CCNH_RAT</a> Cyclin-H                                                                                                               | <a href="#">10</a> | 6.7 | 39.10 | <input type="checkbox"/> |
| 35 | 1.2×10 <sup>-3</sup> | <a href="#">gi 31542350 ref NP_443213.2 </a> cyclin H [Rattus norvegicus]                                                                                             | <a href="#">10</a> | 7.1 | 39.22 | <input type="checkbox"/> |

## NOTE:

1. To search again using [unmatched masses](#), click the symbol .
2. Highly similar protein sequences were given the same rank (click "+" to expand/contract).

**Input Summary****Search id** B199B808-08A8-61B127F9**Sequences** 20092**Date & Time** Mon Jan 29 18:39:11 2007 UTC (Search Time: 0.34 sec.)**Sample ID** 20061228 richardson NIA set 1 spot 6312, 20070128, cleaned data search 1**Database** NCBIInr [..\databases\nr]**Taxonomy** Rattus

**Mass Range** 20 - 50 kDa

**pI Range** 6.0 -9.0

**Digestion** Trypsin

**Missed Cuts** 0

**Modifications** +C2H3ON@C(Complete); +O@M(Partial); +CH2N2@K(Complete);

**Charge State** MH+

**Masses (avg)**

**Tolerance (avg)** 1.00 ppm

**Masses (mon)** 605.335 654.392 662.306 678.347 719.383 722.778 724.771 734.377 753.802  
 791.407 797.854 824.493 832.307 866.484 913.458 948.524 955.505 976.497  
 990.545 999.546 1005.530 1009.439 1058.606 1071.564 1113.597 1137.557  
 1145.558 1219.613 1224.582 1262.605 1280.631 1323.652 1330.599 1335.667  
 1357.611 1470.708 1482.747 1529.738 1543.735 1559.766 1601.772 1624.761  
 1630.752 1642.777 1695.787 1713.813 1751.837 1756.838 1779.866 1790.815  
 1795.860 1808.814 1836.865 1856.865 1893.880 1904.822 1908.887 1920.876  
 1930.916 1935.892 1947.930 1957.939 1962.906 1965.909 2012.934 2021.937  
 2036.968 2037.977 2045.963 2046.972 2051.956 2062.984 2096.968 2121.989  
 2124.019 2173.032 2179.058 2180.066 2191.088 2209.092 2251.154 2314.120  
 2315.105 2324.163 2339.176 2341.192 2348.171 2349.181 2365.172 2366.169  
 2376.199 2377.214 2390.208 2392.229 2408.148 2419.186 2420.185 2433.192  
 2448.143 2460.170 2467.191 2481.168 2482.177 2487.235 2497.184 2504.159  
 2505.124 2536.169 2544.207 2545.173 2552.197 2553.177 2560.207 2562.205  
 2577.229 2593.191 2610.203 2611.163 2631.200 2632.175 2649.215 2650.186  
 2656.218 2657.153 2666.214 2667.194 2673.243 2674.178 2680.231 2681.222  
 2691.200 2692.201 2700.219 2701.226 2712.243 2713.234 2723.232 2724.232  
 2732.230 2733.244 2743.278 2744.252 2759.201 2760.263 2776.258 2777.314  
 2785.301 2786.292 2800.284 2801.287 2804.246 2805.271 2816.252 2818.279  
 2832.259 2833.286 2837.291 2838.307 2848.294 2849.295 2868.358 2884.325  
 2885.304 2896.324 2905.404 2914.355 2922.347 2948.345 2949.338 2964.231  
 2965.315 2977.355 2978.330 2994.271 2995.346 2999.305 3000.426 3011.325  
 3012.334 3020.390 3028.352 3029.566 3047.570 3052.323 3054.335 3061.397  
 3068.366 3069.343 3084.364 3085.365 3092.350 3102.399 3103.411 3111.382  
 3112.371 3172.443 3173.426 3181.450 3182.438 3198.491 3211.469 3220.456  
 3228.486 3233.441 3234.475 3244.481 3245.499 3250.457 3260.479 3276.492  
 3277.456 3292.439 3301.533 3307.497 3308.506 3313.443 3314.491 3329.542  
 3330.555 3342.503 3347.567 3356.531 3357.522 3372.487 3373.504 3378.413  
 3379.494 3390.531 3395.553 3396.525 3408.518 3410.471 3417.451 3418.571  
 3431.542 3432.571 3440.583 3445.551 3446.492 3462.650 3463.501 3469.475  
 3470.559 3477.500 3486.590 3487.643 3509.638 3520.635 3524.625 3534.636  
 3539.563 3548.616 3554.580 3567.646 3579.568 3584.608 3618.618 3638.622  
 3651.635 3665.623 3679.609 3698.654 3709.744 3725.649 3730.697 3739.706  
 3751.648 3756.703 3768.670 3773.746 3780.748 3787.732 3800.726 3817.705  
 3825.712 3834.617 3860.734 3884.813 4095.872 4226.614

**Tolerance (mon)** 15.00 ppm

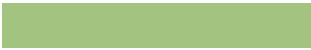

**Number of Peptides** 280

# Laboratory of Mass Spectrometry and Gaseous Ion Chemistry

## PROWL

- ▶ **ProFound**
- ▶ **ProteinInfo**
- ▶ **PeptideMap**
- ▶ **PepFrag**
- ▶ **X! Tandem**
- ▶ **X! Hunter**
- ▶ **GPMDB**
- ▶ **PROWL Home**
- ▶ **Chait Lab**



The Rockefeller University  
1230 York Avenue,  
New York, NY 10021  
(212) 327-8000



**National Center for  
Research Resources**

National Resource  
for the Mass Spectrometric  
Analysis of Biological  
Macromolecules

## ProFound



### Protein Candidates

| Rank | Expectation          | Protein Information and Sequence Analyse Tools (T)                                                    | %  | pI  | kDa   | R |
|------|----------------------|-------------------------------------------------------------------------------------------------------|----|-----|-------|---|
| +1   | 2.0×10 <sup>-8</sup> | gi 458333 gb AAA19133.1  protein tyrosine phosphatase                                                 | 36 | 6.9 | 70.80 | ⊙ |
|      | -                    | gi 6981444 ref NP_037220.1  protein tyrosine phosphatase, non-receptor type 11 [Rattus norvegicus]    | 36 | 6.9 | 70.48 | ⊙ |
| 2    | 3.7×10 <sup>-8</sup> | gi 50926240 gb AAH79209.1  Coronin, actin binding protein 2A [Rattus norvegicus]                      | 34 | 7.0 | 61.59 | ⊙ |
|      | -                    | gi 29293813 ref NP_808789.1  pre-B-cell colony enhancing factor 1 [Rattus norvegicus]                 | 41 | 6.7 | 57.64 | ⊙ |
|      | -                    | gi 16758354 ref NP_446034.1  lipocalin 7 [Rattus norvegicus]                                          | 37 | 6.5 | 54.55 | ⊙ |
|      | -                    | gi 53850604 ref NP_001005540.1  protein phosphatase 2C zeta [Rattus norvegicus]                       | 30 | 7.2 | 56.46 | ⊙ |
|      | -                    | gi 1708153 sp P50545 HCK_RAT Tyrosine-protein kinase HCK (p56-HCK) (Hemopoietic cell kinase)          | 30 | 6.8 | 59.02 | ⊙ |
|      | -                    | gi 57582 emb CAA44218.1  protein-tyrosine kinase [Rattus rattus]                                      | 30 | 6.8 | 58.95 | ⊙ |
|      | -                    | gi 34734058 ref NP_037317.2  hemopoietic cell kinase [Rattus norvegicus]                              | 29 | 7.2 | 61.27 | ⊙ |
|      | -                    | gi 55741778 ref NP_001006998.1  sphingomyelin phosphodiesterase 1, acid lysosomal [Rattus norvegicus] | 24 | 7.1 | 71.51 | ⊙ |
|      | -                    | gi 52138739 ref NP_001004443.1  hexosaminidase A [Rattus norvegicus]                                  | 33 | 6.9 | 62.06 | ⊙ |
|      | -                    | gi 202553 gb AAA40622.1  60 kDa protein                                                               | 30 | 6.6 | 61.40 | ⊙ |
|      | -                    | gi 349096 gb AAA42095.1  transcription factor                                                         | 28 | 7.0 | 57.21 | ⊙ |
|      | -                    | gi 48686583 gb AAT46047.1  hypothetical protein [Rattus norvegicus]                                   | 22 | 6.5 | 66.74 | ⊙ |

|   |                                                                                                                    |    |     |       |   |
|---|--------------------------------------------------------------------------------------------------------------------|----|-----|-------|---|
| - | gi 41054868 ref NP_955788.1  fucose-1-phosphate guanylyltransferase [Rattus norvegicus]                            | 25 | 7.0 | 68.14 | ⊙ |
| - | gi 34932038 ref XP_225891.2  PREDICTED: similar to chloride ion pump-associated 55 kDa protein [Rattus norvegicus] | 26 | 7.2 | 55.67 | ⊙ |
| - | gi 56789277 gb AAH88187.1  Coagulation factor XII (Hageman factor) [Rattus norvegicus]                             | 23 | 7.2 | 69.99 | ⊙ |
| - | gi 16757994 ref NP_445749.1  pyruvate kinase, muscle [Rattus norvegicus]                                           | 33 | 6.6 | 59.83 | ⊙ |
| - | gi 47933915 gb AAT39522.1  ankyrin repeat and SOCS box-containing protein 4 [Rattus norvegicus]                    | 24 | 7.1 | 50.34 | ⊙ |
| - | gi 203695 gb AAA41007.1  cytochrome P450                                                                           | 34 | 7.2 | 59.00 | ⊙ |
| - | gi 206205 gb AAB93667.1  M2 pyruvate kinase [Rattus norvegicus]                                                    | 27 | 7.2 | 59.89 | ⊙ |
| - | gi 92061 pir  A31948 carnitine octanoyltransferase, hepatic - rat                                                  | 23 | 6.8 | 62.57 | ⊙ |
| - | gi 2493792 sp Q63514 C4BP_RAT C4b-binding protein alpha chain precursor (C4bp)                                     | 13 | 7.2 | 65.82 | ⊙ |
| - | gi 16758600 ref NP_446216.1  regulator of G-protein signaling 14 [Rattus norvegicus]                               | 22 | 7.2 | 61.16 | ⊙ |
| - | gi 48428187 sp P62024 PHAR1_RAT Phosphatase and actin regulator 1                                                  | 21 | 6.6 | 68.21 | ⊙ |
| - | gi 38328492 gb AAH62243.1  LOC303057 protein [Rattus norvegicus]                                                   | 22 | 7.0 | 61.33 | ⊙ |
| - | gi 42627865 ref NP_976081.1  estrogen-related receptor gamma [Rattus norvegicus]                                   | 13 | 6.7 | 50.73 | ⊙ |

## NOTE:

1. To search again using **unmatched masses**, click the symbol .
2. Highly similar protein sequences were given the same rank (click "+" to expand/contract).

**Input Summary**

Search id AA174277-1028-5A312056

Sequences 20092

Date &amp; Time Wed Jan 31 14:53:20 2007 UTC (Search Time: 0.49 sec.)

**Sample ID****Database** NCBI nr [..\databases\nr]**Taxonomy** Rattus**Mass Range** 50 - 72 kDa**pI Range** 6.5 -7.5**Digestion** Trypsin**Missed Cuts** 1**Modifications** +C2H3ON@C(Complete); +O@M(Partial); +HPO3@TY  
(Partial); +CH2N2@K(Complete);**Charge State** MH+**Masses (avg)****Tolerance (avg)** 1.00 ppm

| <b>Masses (mon)</b> | 841.459  | 1091.562 | 1280.642 | 1313.624 | 1756.843 | 1780.851 |
|---------------------|----------|----------|----------|----------|----------|----------|
|                     | 1828.868 | 1837.857 | 1871.876 | 1895.879 | 1904.886 | 1908.892 |
|                     | 1930.913 | 1934.903 | 1949.913 | 1964.913 | 1983.939 | 2005.935 |
|                     | 2006.937 | 2017.937 | 2018.944 | 2021.939 | 2035.958 | 2036.956 |
|                     | 2038.948 | 2039.958 | 2042.961 | 2043.971 | 2046.962 | 2047.968 |
|                     | 2053.968 | 2054.971 | 2070.992 | 2098.996 | 2116.011 | 2124.017 |
|                     | 2150.026 | 2183.097 | 2209.088 | 2241.127 | 2242.145 | 2266.154 |
|                     | 2298.154 | 2306.156 | 2363.136 | 2364.130 | 2373.148 | 2374.173 |
|                     | 2390.145 | 2397.131 | 2399.146 | 2405.150 | 2435.210 | 2436.189 |
|                     | 2447.166 | 2448.184 | 2460.166 | 2463.186 | 2464.194 | 2497.190 |
|                     | 2507.197 | 2514.184 | 2537.203 | 2538.202 | 2547.210 | 2548.202 |
|                     | 2557.195 | 2558.213 | 2577.228 | 2591.213 | 2594.213 | 2595.212 |
|                     | 2602.239 | 2603.216 | 2606.227 | 2607.235 | 2613.217 | 2614.232 |
|                     | 2622.220 | 2638.236 | 2639.242 | 2648.235 | 2649.236 | 2655.257 |
|                     | 2656.236 | 2667.239 | 2668.231 | 2679.256 | 2685.234 | 2686.230 |
|                     | 2690.266 | 2691.248 | 2699.261 | 2700.260 | 2714.266 | 2715.268 |
|                     | 2718.252 | 2719.257 | 2724.278 | 2725.269 | 2732.278 | 2733.293 |
|                     | 2743.288 | 2744.270 | 2750.291 | 2751.309 | 2756.299 | 2757.270 |
|                     | 2769.310 | 2770.251 | 2778.301 | 2779.290 | 2784.307 | 2785.300 |
|                     | 2789.277 | 2790.304 | 2803.303 | 2804.284 | 2819.323 | 2820.326 |
|                     | 2832.317 | 2839.341 | 2840.306 | 2850.326 | 2866.322 | 2875.300 |
|                     | 2876.301 | 2882.319 | 2898.356 | 2904.337 | 2914.362 | 2922.348 |
|                     | 2937.371 | 2949.355 | 2950.363 | 2962.372 | 2963.372 | 2967.368 |
|                     | 2978.369 | 2979.341 | 2985.404 | 2995.418 | 2996.390 | 3000.435 |



|          |          |          |          |          |          |
|----------|----------|----------|----------|----------|----------|
| 3001.399 | 3010.391 | 3011.409 | 3018.372 | 3030.493 | 3047.465 |
| 3048.473 | 3060.423 | 3065.393 | 3077.458 | 3094.472 | 3095.494 |
| 3105.444 | 3112.442 | 3138.467 | 3147.436 | 3148.469 | 3179.460 |
| 3188.469 | 3196.455 | 3202.477 | 3203.459 | 3212.488 | 3214.484 |
| 3220.483 | 3230.491 | 3244.480 | 3245.481 | 3253.464 | 3260.490 |
| 3283.499 | 3290.497 | 3291.531 | 3301.544 | 3308.536 | 3309.552 |
| 3318.533 | 3319.510 | 3328.530 | 3329.477 | 3337.562 | 3347.525 |
| 3348.547 | 3368.583 | 3384.551 | 3390.539 | 3391.552 | 3398.542 |
| 3399.541 | 3405.564 | 3417.535 | 3423.524 | 3424.541 | 3428.567 |
| 3429.556 | 3447.540 | 3448.553 | 3465.580 | 3466.569 | 3474.562 |
| 3475.558 | 3480.588 | 3481.544 | 3487.619 | 3488.580 | 3493.561 |
| 3498.529 | 3507.606 | 3516.616 | 3524.562 | 3530.586 | 3536.630 |
| 3543.603 | 3553.598 | 3563.593 | 3583.572 | 3594.646 | 3601.657 |
| 3620.617 | 3654.615 | 3662.682 | 3676.691 | 3695.660 | 3718.637 |
| 3726.640 | 3742.690 | 3986.792 | 4189.949 | 4209.995 | 4219.903 |
| 4457.271 | 4476.357 | 4501.479 |          |          |          |

**Tolerance** 26.00 ppm  
**(mon)**

**Number of** 237  
**Peptides**



PROWL

## ProFound

- [ProFound](#)
- [ProteinInfo](#)
- [PeptideMap](#)
- [PepFrag](#)
- [X! Tandem](#)
- [X! Hunter](#)
- [GPMDB](#)
  
- [PROWL Home](#)
- [Chait Lab](#)

The Rockefeller  
University

The Rockefeller University  
1230 York Avenue,  
New York, NY 10021  
(212) 327-8000

National Center of  
Research Resources

National Resource  
for the Mass Spectrometric  
Analysis of Biological  
Macromolecules

## Protein Candidates

| Rank | Expectation           | Protein Information and Sequence Analyse Tools (T)                                                                                              | %                  | pI  | kDa   | R                        |
|------|-----------------------|-------------------------------------------------------------------------------------------------------------------------------------------------|--------------------|-----|-------|--------------------------|
| +1   | 4.0×10 <sup>-26</sup> | <a href="#">gi 40538860 ref NP_077374.2 </a> aconitase 2, mitochondrial [Rattus norvegicus]                                                     | <a href="#">12</a> | 8.2 | 88.39 | <input type="checkbox"/> |
|      | -                     | <a href="#">gi 10637996 emb CAC11018.1 </a> mitochondrial aconitase [Rattus norvegicus]                                                         | <a href="#">11</a> | 8.2 | 88.43 | <input type="checkbox"/> |
| +2   | 1.2×10 <sup>-10</sup> | <a href="#">gi 34870506 ref XP_340764.1 </a> PREDICTED: similar to cyclin F [Rattus norvegicus]                                                 | <a href="#">9</a>  | 6.4 | 90.42 | <input type="checkbox"/> |
|      | -                     | <a href="#">gi 21311259 gb AAM46626.1 </a> cyclin F [Rattus norvegicus]                                                                         | <a href="#">7</a>  | 6.5 | 86.70 | <input type="checkbox"/> |
| 3    | 1.1×10 <sup>-5</sup>  | <a href="#">gi 50926941 gb AAH79073.1 </a> Mitogen-activated protein kinase associated protein 1 [Rattus norvegicus]                            | <a href="#">9</a>  | 7.3 | 61.35 | <input type="checkbox"/> |
| +4   | 3.0×10 <sup>-5</sup>  | <a href="#">gi 112393 pir S09178 </a> thyroid hormone receptor alpha - rat                                                                      | <a href="#">13</a> | 8.8 | 49.36 | <input type="checkbox"/> |
|      | -                     | <a href="#">gi 55932 emb CAA31237.1 </a> c-erb-A thyroid hormone receptor [Rattus norvegicus]                                                   | <a href="#">14</a> | 8.5 | 47.84 | <input type="checkbox"/> |
| 5    | 3.8×10 <sup>-5</sup>  | <a href="#">gi 55250416 gb AAH85812.1 </a> Neural precursor cell expressed, developmentally down-regulated gene 9 [Rattus norvegicus]           | <a href="#">9</a>  | 6.0 | 95.60 | <input type="checkbox"/> |
| 6    | 7.6×10 <sup>-5</sup>  | <a href="#">gi 3493139 gb AAC33292.1 </a> kinesin-like protein KIF1B [Rattus norvegicus]                                                        | <a href="#">8</a>  | 6.0 | 80.16 | <input type="checkbox"/> |
| 7    | 9.1×10 <sup>-5</sup>  | <a href="#">gi 55715679 gb AAH85890.1 </a> Peptidylprolyl isomerase (cyclophilin)-like 2 [Rattus norvegicus]                                    | <a href="#">10</a> | 8.9 | 61.50 | <input type="checkbox"/> |
| 8    | 9.5×10 <sup>-5</sup>  | <a href="#">gi 47605759 sp Q8R500 MFN2_RAT</a> Transmembrane GTPase MFN2 (Mitofusin-2) (Mitochondrial transmembrane GTPase FZO1A) (Protein HSG) | <a href="#">8</a>  | 6.5 | 88.61 | <input type="checkbox"/> |
| +9   | 1.0×10 <sup>-4</sup>  | <a href="#">gi 206175 gb AAA41868.1 </a> protein kinase C beta-1                                                                                | <a href="#">10</a> | 6.5 | 80.45 | <input type="checkbox"/> |
|      | -                     | <a href="#">gi 55977078 sp P68403 KPCB_RAT</a> Protein kinase C beta type (PKC-beta) (PKC-B)                                                    | <a href="#">10</a> | 6.6 | 80.35 | <input type="checkbox"/> |
| 10   | 2.0×10 <sup>-4</sup>  | <a href="#">gi 41055880 ref NP_570964.3 </a> hypertension-related protein [Rattus norvegicus]                                                   | <a href="#">6</a>  | 6.4 | 88.61 | <input type="checkbox"/> |
| 11   | 2.0×10 <sup>-4</sup>  | <a href="#">gi 53850626 ref NP_001005549.1 </a> tubulointerstitial nephritis antigen [Rattus norvegicus]                                        | <a href="#">8</a>  | 8.8 | 56.46 | <input type="checkbox"/> |
| 12   | 4.2×10 <sup>-4</sup>  | <a href="#">gi 13928912 ref NP_113847.1 </a> transglutaminase type 1 [Rattus norvegicus]                                                        | <a href="#">7</a>  | 6.0 | 92.80 | <input type="checkbox"/> |
| 13   | 2.1×10 <sup>-3</sup>  | <a href="#">gi 56971343 gb AAH88275.1 </a> Nucleolar complex associated 4 homolog (S. cerevisiae) [Rattus norvegicus]                           | <a href="#">12</a> | 6.4 | 60.44 | <input type="checkbox"/> |
| 14   | 0.034                 | <a href="#">gi 44890250 gb AAH66665.1 </a> Transglutaminase 4 (prostate) [Rattus norvegicus]                                                    | <a href="#">9</a>  | 8.5 | 78.00 | <input type="checkbox"/> |

NOTE:

1. To search again using [unmatched masses](#), click the symbol

2. Highly similar protein sequences were given the same rank (click "+" to expand/contract).

### Input Summary

**Search id** A9C2F862-107C-59DD2025

**Sequences** 20092

**Date & Time** Wed Jan 31 20:08:02 2007 UTC (Search Time: 0.38 sec.)

**Sample ID** 20061228 richardson NIA set 1 spot 6820 , 20070131, cleaned data search 1

**Database** NCBIInr [..\databases\nr]

**Taxonomy** Rattus

**Mass Range** 45 - 100 kDa

**pI Range** 6.0 -9.0

**Digestion** Trypsin

**Missed Cuts** 0

**Modifications** +C2H3ON@C(Complete); +CH2N2@K(Complete);

**Charge State** MH+

**Masses (avg)**

**Tolerance (avg)** 1.00 ppm

**Masses (mon)** 648.387 663.329 832.310 991.515 1145.598 1194.589 1199.657 1211.588  
 1220.599 1224.602 1241.702 1248.613 1257.586 1262.627 1268.617 1277.630  
 1280.644 1291.616 1310.632 1330.604 1463.726 1500.747 1514.793 1525.751  
 1530.741 1536.733 1542.777 1547.754 1553.798 1557.775 1568.751 1572.768  
 1581.737 1589.762 1599.766 1601.784 1630.768 1639.747 1643.779 1653.760  
 1679.771 1684.808 1695.786 1713.805 1720.819 1744.835 1761.850 1765.837  
 1779.857 1784.841 1796.882 1803.881 1838.857 1868.905 1879.864 1896.885  
 1899.904 1908.886 1931.914 1948.926 1957.918 1964.913 2005.937 2006.929  
 2017.940 2018.938 2023.953 2033.939 2035.966 2038.955 2039.968 2045.968  
 2046.973 2049.965 2050.962 2072.993 2099.001 2100.004 2125.013 2126.017  
 2152.051 2183.079 2201.122 2209.089 2242.139 2243.145 2291.154 2306.144  
 2316.149 2317.151 2364.156 2365.167 2375.161 2381.183 2382.168 2390.161  
 2401.162 2402.157 2405.170 2419.171 2420.162 2428.169 2429.166 2436.185  
 2437.196 2446.178 2447.161 2460.170 2479.184 2497.195 2506.171 2507.198  
 2513.207 2514.190 2533.189 2534.204 2536.212 2537.206 2551.204 2552.218  
 2556.184 2557.202 2561.221 2562.214 2574.203 2591.193 2604.198 2605.221  
 2632.234 2633.201 2638.238 2639.239 2647.240 2648.232 2666.215 2668.220  
 2675.243 2677.235 2678.233 2690.252 2692.260 2718.272 2719.260 2723.266  
 2724.277 2733.257 2734.267 2743.279 2751.267 2752.303 2762.267 2763.309  
 2780.395 2786.312 2787.302 2795.285 2804.313 2822.408 2837.326 2849.314  
 2850.325 2865.351 2866.332 2879.319 2894.371 2906.396 2924.352 2931.364  
 2937.362 2943.384 2944.404 2959.368 2960.371 2967.354 2977.351 2978.409  
 2985.404 2986.430 3001.411 3002.407 3010.376 3011.382 3020.368 3030.478  
 3063.429 3064.396 3077.440 3105.439 3122.433 3136.416 3147.477 3148.479  
 3180.481 3181.475 3210.463 3211.467 3220.481 3227.465 3243.488 3244.493



|          |          |          |          |          |          |          |          |
|----------|----------|----------|----------|----------|----------|----------|----------|
| 3275.492 | 3281.484 | 3292.449 | 3313.503 | 3328.514 | 3329.507 | 3346.491 | 3347.519 |
| 3356.477 | 3357.514 | 3368.536 | 3369.484 | 3372.498 | 3373.529 | 3378.536 | 3380.492 |
| 3385.515 | 3387.517 | 3399.517 | 3400.531 | 3404.543 | 3405.540 | 3417.485 | 3418.533 |
| 3433.549 | 3434.569 | 3440.490 | 3441.534 | 3450.600 | 3462.580 | 3464.496 | 3476.560 |
| 3477.559 | 3481.602 | 3482.556 | 3499.571 | 3510.612 | 3516.641 | 3527.594 | 3540.585 |
| 3554.583 | 3560.635 | 3564.595 | 3576.620 | 3589.696 | 3597.625 | 3613.587 | 3620.595 |
| 3634.643 | 3651.669 | 3662.641 | 3667.676 | 3683.675 | 3692.671 | 3696.691 | 3711.662 |
| 3720.675 | 3728.715 | 3738.667 | 3744.720 | 3756.753 | 3769.697 | 3779.705 | 3790.724 |
| 3798.751 | 3805.757 | 3822.734 | 3842.706 | 3849.729 | 3871.728 | 3883.792 | 4164.883 |
| 4174.840 | 4181.801 | 4209.980 |          |          |          |          |          |

**Tolerance (mon)** 16.00 ppm

**Number of Peptides** 275

PROWL

## ProFound

- [ProFound](#)
- [ProteinInfo](#)
- [PeptideMap](#)
- [PepFrag](#)
- [X! Tandem](#)
- [X! Hunter](#)
- [GPMDB](#)
- [PROWL Home](#)
- [Chait Lab](#)

The Rockefeller  
University

The Rockefeller University  
1230 York Avenue,  
New York, NY 10021  
(212) 327-8000

National Center of  
Research Resources

National Resource  
for the Mass Spectrometric  
Analysis of Biological  
Macromolecules

## Protein Candidates

| Rank | Expectation           | Protein Information and Sequence Analyse Tools (T)                                                                                                                            | %                  | pI  | kDa   | R                        |
|------|-----------------------|-------------------------------------------------------------------------------------------------------------------------------------------------------------------------------|--------------------|-----|-------|--------------------------|
| +1   | 3.0×10 <sup>-21</sup> | <a href="#">gi 3915863 sp P52847 ST1B1_RAT</a> Sulfotransferase family cytosolic 1B member 1 (Sulfotransferase 1B1) (DOPA/tyrosine sulfotransferase)                          | <a href="#">28</a> | 8.4 | 36.39 | <input type="checkbox"/> |
|      | -                     | <a href="#">gi 11968092 ref NP_071958.1</a> sulfotransferase family 1B, member 1 [Rattus norvegicus]                                                                          | <a href="#">21</a> | 8.7 | 36.32 | <input type="checkbox"/> |
| 2    | 1.4×10 <sup>-7</sup>  | <a href="#">gi 56268926 gb AAH87146.1</a> Nit1 protein [Rattus norvegicus]                                                                                                    | <a href="#">14</a> | 6.6 | 37.15 | <input type="checkbox"/> |
| 3    | 1.4×10 <sup>-7</sup>  | <a href="#">gi 57164003 ref NP_001009175.1</a> tripartite motif-containing 40 [Rattus norvegicus]                                                                             | <a href="#">11</a> | 6.8 | 29.79 | <input type="checkbox"/> |
| 4    | 1.9×10 <sup>-7</sup>  | <a href="#">gi 34881169 ref XP_223005.2</a> PREDICTED: similar to degenerative spermatocyte homolog 1 [Rattus norvegicus]                                                     | <a href="#">11</a> | 7.9 | 38.83 | <input type="checkbox"/> |
| 5    | 9.9×10 <sup>-7</sup>  | <a href="#">gi 34870345 ref XP_233430.2</a> PREDICTED: similar to T-cell acute lymphocytic leukemia-1 protein homolog (TAL-1 protein) (Stem cell protein) [Rattus norvegicus] | <a href="#">5</a>  | 8.0 | 35.13 | <input type="checkbox"/> |
| 6    | 1.0×10 <sup>-6</sup>  | <a href="#">gi 47577415 ref NP_001000291.1</a> olfactory receptor Olr455 [Rattus norvegicus]                                                                                  | <a href="#">8</a>  | 7.8 | 36.16 | <input type="checkbox"/> |
| 7    | 1.0×10 <sup>-6</sup>  | <a href="#">gi 1228944 dbj BAA11433.1</a> protein tyrosine phosphatase epsilon M [Rattus norvegicus]                                                                          | <a href="#">12</a> | 7.0 | 35.53 | <input type="checkbox"/> |
| 8    | 1.4×10 <sup>-6</sup>  | <a href="#">gi 204456 gb AAA41269.1</a> Heymann nephritis antigen gp330                                                                                                       | <a href="#">8</a>  | 7.1 | 38.84 | <input type="checkbox"/> |
| 9    | 1.8×10 <sup>-6</sup>  | <a href="#">gi 55550 emb CAA78040.1</a> 45kDa protein [Rattus norvegicus]                                                                                                     | <a href="#">7</a>  | 6.9 | 43.31 | <input type="checkbox"/> |
| 10   | 2.0×10 <sup>-6</sup>  | <a href="#">gi 51980664 gb AAH82020.1</a> Lrpap1 protein [Rattus norvegicus]                                                                                                  | <a href="#">7</a>  | 6.9 | 43.61 | <input type="checkbox"/> |
| 11   | 9.0×10 <sup>-6</sup>  | <a href="#">gi 32395723 gb AAP37958.1</a> T-cell receptor beta chain [Rattus norvegicus]                                                                                      | <a href="#">9</a>  | 8.8 | 34.92 | <input type="checkbox"/> |
| 12   | 0.42                  | <a href="#">gi 7637875 gb AAF65233.1 AF212861_1</a> membrane interacting protein of RGS16 [Rattus norvegicus]                                                                 | <a href="#">11</a> | 6.4 | 38.60 | <input type="checkbox"/> |

## NOTE:

1. To search again using [unmatched masses](#), click the symbol .
2. Highly similar protein sequences were given the same rank (click "+" to expand/contract).

## Input Summary

Search id A8C99F89-1178-58E11F29

Sequences 20092

Date &amp; Time Mon Jan 29 19:46:06 2007 UTC (Search Time: 0.33 sec.)

**Sample ID** 20061228 richardson NIA set 1 spot 7403, 20070128, cleaned data search 1

**Database** NCBIInr [..\databases\Inr]

**Taxonomy** Rattus

**Mass Range** 25 - 50 kDa

**pI Range** 6.4 -8.8

**Digestion** Trypsin

**Missed Cuts** 0

**Modifications** +C2H3ON@C(Complete); +NO2-H@Y(Partial); +CH2N2@K(Complete);

**Charge State** MH+

**Masses (avg)**

**Tolerance (avg)** 1.00 ppm

**Masses (mon)** 654.388 719.381 734.378 806.421 824.495 904.440 918.463 948.522 955.496  
 990.543 1003.552 1058.501 1080.495 1217.637 1219.617 1224.582 1226.586  
 1244.591 1248.607 1257.751 1262.612 1271.565 1280.612 1290.609 1313.636  
 1330.600 1357.610 1446.719 1454.731 1529.737 1543.729 1557.776 1602.802  
 1628.927 1653.924 1670.949 1685.802 1743.794 1751.821 1757.842 1762.810  
 1765.802 1791.818 1808.834 1837.856 1851.832 1874.872 1880.901 1888.879  
 1890.860 1897.922 1904.849 1908.883 1913.892 1932.895 1950.916 1959.921  
 1964.894 1987.931 2000.913 2001.919 2004.895 2005.920 2012.950 2016.909  
 2017.903 2023.948 2033.924 2034.925 2037.946 2038.957 2050.945 2051.950  
 2066.000 2070.961 2074.957 2075.963 2099.007 2132.021 2150.030 2159.029  
 2180.047 2181.070 2234.129 2309.158 2349.137 2351.146 2367.135 2368.128  
 2382.175 2383.170 2392.158 2397.145 2398.160 2415.114 2416.084 2433.143  
 2440.166 2441.171 2448.133 2458.132 2466.176 2467.183 2486.167 2497.158  
 2503.166 2504.134 2517.172 2534.131 2535.174 2547.162 2555.143 2562.169  
 2574.159 2577.152 2591.177 2610.190 2611.189 2635.185 2636.195 2651.198  
 2652.203 2664.166 2665.185 2669.222 2670.215 2680.198 2681.203 2689.195  
 2690.184 2719.226 2721.206 2730.210 2731.209 2744.229 2745.216 2763.241  
 2764.231 2776.271 2777.261 2785.223 2786.240 2795.254 2796.261 2804.250  
 2805.246 2818.279 2819.252 2824.174 2825.260 2831.253 2833.246 2836.296  
 2837.277 2849.261 2850.294 2889.315 2890.307 2906.302 2914.301 2921.304  
 2950.289 2963.295 2964.301 2980.302 2981.335 3004.348 3011.370 3012.325  
 3020.345 3029.357 3030.532 3033.369 3034.363 3047.352 3048.492 3053.337  
 3062.376 3063.381 3077.382 3084.359 3085.354 3092.399 3105.406 3110.392  
 3111.385 3135.409 3136.422 3147.445 3149.444 3181.442 3182.439 3198.454  
 3212.469 3213.457 3228.455 3266.451 3275.474 3276.475 3281.460 3292.464  
 3314.477 3329.580 3340.522 3356.507 3357.481 3373.400 3374.482 3383.500  
 3396.501 3397.488 3408.499 3409.522 3420.518 3434.517 3435.501 3446.507  
 3447.512 3449.465 3458.553 3459.528 3464.579 3474.452 3475.529 3486.568  
 3487.558 3500.571 3510.555 3519.577 3526.578 3536.580 3549.570 3554.584  
 3558.561 3564.552 3574.607 3590.605 3595.616 3606.565 3611.587 3618.601  
 3652.608 3663.652 3667.609 3684.617 3698.680 3710.674 3722.640 3729.602  
 3740.628 3753.670 3761.639 3780.646 3787.720 3801.672 3812.718 3821.638

3837.673 4048.775 4094.747 4109.781

**Tolerance (mon)** 15.00 ppm

**Number of Peptides** 261

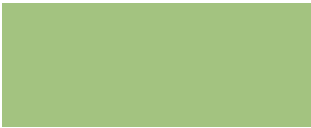

PROWL

## ProFound

- [ProFound](#)
- [ProteinInfo](#)
- [PeptideMap](#)
- [PepFrag](#)
- [X! Tandem](#)
- [X! Hunter](#)
- [GPMDB](#)
- [PROWL Home](#)
- [Chait Lab](#)

The Rockefeller  
University

The Rockefeller University  
1230 York Avenue,  
New York, NY 10021  
(212) 327-8000

National Center of  
Research Resources

National Resource  
for the Mass Spectrometric  
Analysis of Biological  
Macromolecules

## Protein Candidates

| Rank | Expectation           | Protein Information and Sequence Analyse Tools (T)                                                                                                                                  | %                  | pI  | kDa   | R                        |
|------|-----------------------|-------------------------------------------------------------------------------------------------------------------------------------------------------------------------------------|--------------------|-----|-------|--------------------------|
| +1   | 1.3×10 <sup>-31</sup> | <a href="#">gi 120707 sp P04797 G3P_RAT</a> Glyceraldehyde-3-phosphate dehydrogenase (GAPDH) (38 kDa BFA-dependent ADP-ribosylation substrate) (BARS-38)                            | <a href="#">39</a> | 8.7 | 37.24 | <input type="checkbox"/> |
|      | -                     | <a href="#">gi 8393418 ref NP_058704.1</a> glyceraldehyde-3-phosphate dehydrogenase [Rattus norvegicus]                                                                             | <a href="#">28</a> | 8.4 | 37.19 | <input type="checkbox"/> |
|      | -                     | <a href="#">gi 56611127 gb AAH87743.1</a> Glyceraldehyde-3-phosphate dehydrogenase [Rattus norvegicus]                                                                              | <a href="#">21</a> | 8.4 | 37.15 | <input type="checkbox"/> |
| 2    | 6.9×10 <sup>-10</sup> | <a href="#">gi 13027414 ref NP_076454.1</a> glyceraldehyde-3-phosphate dehydrogenase, spermatogenic [Rattus norvegicus]                                                             | <a href="#">12</a> | 8.7 | 48.43 | <input type="checkbox"/> |
| 3    | 1.0×10 <sup>-9</sup>  | <a href="#">gi 51260852 gb AAH79474.1</a> Mamdc2 protein [Rattus norvegicus]                                                                                                        | <a href="#">17</a> | 6.2 | 28.89 | <input type="checkbox"/> |
| +4   | 1.1×10 <sup>-9</sup>  | <a href="#">gi 50926816 gb AAH78833.1</a> Phosphotriesterase related [Rattus norvegicus]                                                                                            | <a href="#">17</a> | 6.4 | 40.23 | <input type="checkbox"/> |
|      | -                     | <a href="#">gi 3914481 sp Q63530 PTER_RAT</a> Phosphotriesterase-related protein (Parathion hydrolase-related protein) (Resiniferotoxin-binding phosphotriesterase-related protein) | <a href="#">17</a> | 6.1 | 40.01 | <input type="checkbox"/> |
| 5    | 1.2×10 <sup>-9</sup>  | <a href="#">gi 10644491 gb AAG21310.1 AF271037_1</a> odorant receptor [Rattus norvegicus]                                                                                           | <a href="#">14</a> | 8.1 | 30.91 | <input type="checkbox"/> |
| 6    | 6.8×10 <sup>-8</sup>  | <a href="#">gi 12083663 ref NP_073192.1</a> flotillin 1 [Rattus norvegicus]                                                                                                         | <a href="#">13</a> | 7.1 | 41.12 | <input type="checkbox"/> |
| +7   | 4.4×10 <sup>-7</sup>  | <a href="#">gi 38051964 gb AAH60541.1</a> Txndc9 protein [Rattus norvegicus]                                                                                                        | <a href="#">23</a> | 6.3 | 31.08 | <input type="checkbox"/> |
|      | -                     | <a href="#">gi 21105482 gb AAM34684.1 AF508022_1</a> ES cell-related protein [Rattus norvegicus]                                                                                    | <a href="#">24</a> | 6.6 | 30.32 | <input type="checkbox"/> |
| 8    | 5.5×10 <sup>-6</sup>  | <a href="#">gi 55932 emb CAA31237.1</a> c-erb-A thyroid hormone receptor [Rattus norvegicus]                                                                                        | <a href="#">13</a> | 8.5 | 47.84 | <input type="checkbox"/> |
| 9    | 1.2×10 <sup>-5</sup>  | <a href="#">gi 6724176 gb AAF26878.1 AF196232_1</a> T cell receptor V delta 6 [Rattus norvegicus]                                                                                   | <a href="#">14</a> | 7.8 | 28.45 | <input type="checkbox"/> |
| 10   | 3.1×10 <sup>-5</sup>  | <a href="#">gi 56789328 gb AAH88205.1</a> Dual specificity phosphatase 2 [Rattus norvegicus]                                                                                        | <a href="#">17</a> | 6.3 | 35.43 | <input type="checkbox"/> |
| 11   | 10.0×10 <sup>-5</sup> | <a href="#">gi 32478176 gb AAP83441.1</a> GNAT acetyltransferase [Rattus norvegicus]                                                                                                | <a href="#">6</a>  | 7.2 | 28.28 | <input type="checkbox"/> |
| 12   | 1.1×10 <sup>-4</sup>  | <a href="#">gi 47577825 ref NP_001000438.1</a> olfactory receptor Olr1214 [Rattus norvegicus]                                                                                       | <a href="#">18</a> | 7.1 | 35.65 | <input type="checkbox"/> |
| 13   | 1.3×10 <sup>-4</sup>  | <a href="#">gi 741803 prf 2008147A</a> protein RAKb                                                                                                                                 | <a href="#">13</a> | 7.9 | 38.13 | <input type="checkbox"/> |
| 14   | 1.5×10 <sup>-4</sup>  | <a href="#">gi 56605792 ref NP_001008359.1</a> hypothetical protein LOC315286 [Rattus norvegicus]                                                                                   | <a href="#">12</a> | 6.3 | 29.57 | <input type="checkbox"/> |

|     |                      |                                                                                                                                        |                    |     |       |                          |
|-----|----------------------|----------------------------------------------------------------------------------------------------------------------------------------|--------------------|-----|-------|--------------------------|
| 15  | 1.8×10 <sup>-4</sup> | <a href="#">gi 18041977 gb AAL57768.1</a> hypothetical RNA binding protein RDA288 [Rattus norvegicus]                                  | <a href="#">10</a> | 8.4 | 44.44 | <input type="checkbox"/> |
| 16  | 1.8×10 <sup>-4</sup> | <a href="#">gi 57977275 ref NP_659554.1</a> PAI-1 mRNA-binding protein [Rattus norvegicus]                                             | <a href="#">10</a> | 8.4 | 44.41 | <input type="checkbox"/> |
| +17 | 1.9×10 <sup>-4</sup> | <a href="#">gi 56555 emb CAA30528.1</a> unnamed protein product [Rattus norvegicus]                                                    | <a href="#">7</a>  | 6.0 | 20.71 | <input type="checkbox"/> |
|     | -                    | <a href="#">gi 2039340 gb AAB52995.1</a> putative RNA binding protein 1 [Rattus norvegicus]                                            | <a href="#">6</a>  | 6.4 | 21.64 | <input type="checkbox"/> |
| 18  | 2.1×10 <sup>-4</sup> | <a href="#">gi 27527649 emb CAC81080.1</a> aflatoxin B1 aldehyde reductase [Rattus norvegicus]                                         | <a href="#">9</a>  | 6.1 | 38.52 | <input type="checkbox"/> |
| 19  | 2.1×10 <sup>-4</sup> | <a href="#">gi 16758896 ref NP_446442.1</a> protein tyrosine phosphatase, non-receptor type 2 [Rattus norvegicus]                      | <a href="#">12</a> | 8.9 | 43.53 | <input type="checkbox"/> |
| 20  | 2.3×10 <sup>-4</sup> | <a href="#">gi 19705537 ref NP_599234.1</a> aldo-keto reductase family 7, member A2 (aflatoxin aldehyde reductase) [Rattus norvegicus] | <a href="#">9</a>  | 6.3 | 38.53 | <input type="checkbox"/> |
| 21  | 2.8×10 <sup>-4</sup> | <a href="#">gi 8393641 ref NP_058889.1</a> aminoadipate aminotransferase [Rattus norvegicus]                                           | <a href="#">12</a> | 8.4 | 49.29 | <input type="checkbox"/> |
| 22  | 3.0×10 <sup>-4</sup> | <a href="#">gi 39930812 sp Q8CG45 ARK72_RAT</a> Aflatoxin B1 aldehyde reductase member 2 (rAFAR2)                                      | <a href="#">8</a>  | 8.9 | 41.66 | <input type="checkbox"/> |
| 23  | 3.0×10 <sup>-4</sup> | <a href="#">gi 22652804 gb AAN03824.1</a> aldehyde reductase AFAR2 subunit [Rattus norvegicus]                                         | <a href="#">8</a>  | 7.9 | 41.63 | <input type="checkbox"/> |
| 24  | 3.2×10 <sup>-4</sup> | <a href="#">gi 12004240 gb AAG43956.1 AF214647_1</a> ceramidase [Rattus norvegicus]                                                    | <a href="#">8</a>  | 8.9 | 45.76 | <input type="checkbox"/> |
| 25  | 3.2×10 <sup>-4</sup> | <a href="#">gi 40254747 ref NP_445859.2</a> N-acylsphingosine amidohydrolase 1 [Rattus norvegicus]                                     | <a href="#">8</a>  | 8.9 | 45.83 | <input type="checkbox"/> |
| 26  | 4.4×10 <sup>-4</sup> | <a href="#">gi 6981406 ref NP_036762.1</a> prolactin receptor isoform b [Rattus norvegicus]                                            | <a href="#">15</a> | 6.0 | 36.83 | <input type="checkbox"/> |
| 27  | 7.9×10 <sup>-4</sup> | <a href="#">gi 2585995 gb AAC95063.1</a> stathmin-like-protein splice variant RB3" [Rattus norvegicus]                                 | <a href="#">8</a>  | 8.6 | 26.75 | <input type="checkbox"/> |
| 28  | 1.1×10 <sup>-3</sup> | <a href="#">gi 39930501 ref NP_446228.1</a> zuotin related factor 2 [Rattus norvegicus]                                                | <a href="#">11</a> | 6.2 | 33.92 | <input type="checkbox"/> |
| 29  | 1.2×10 <sup>-3</sup> | <a href="#">gi 46359595 dbj BAD15354.1</a> interleukin-1 receptor accessory protein [Rattus norvegicus]                                | <a href="#">23</a> | 6.4 | 25.13 | <input type="checkbox"/> |
| 30  | 1.4×10 <sup>-3</sup> | <a href="#">gi 55391506 gb AAH85357.1</a> Fg12 protein [Rattus norvegicus]                                                             | <a href="#">5</a>  | 6.7 | 49.60 | <input type="checkbox"/> |
| 31  | 1.6×10 <sup>-3</sup> | <a href="#">gi 21326465 ref NP_647552.1</a> UDP-glucuronate decarboxylase 1 [Rattus norvegicus]                                        | <a href="#">6</a>  | 9.0 | 48.86 | <input type="checkbox"/> |
| 32  | 1.7×10 <sup>-3</sup> | <a href="#">gi 9507217 ref NP_062052.1</a> thymidylate synthase [Rattus norvegicus]                                                    | <a href="#">5</a>  | 6.0 | 35.96 | <input type="checkbox"/> |
| 33  | 2.7×10 <sup>-3</sup> | <a href="#">gi 13925523 gb AAK49392.1</a> NHE3 kinase A regulatory protein E3KARP [Rattus norvegicus]                                  | <a href="#">9</a>  | 6.7 | 35.76 | <input type="checkbox"/> |
| 34  | 2.8×10 <sup>-3</sup> | <a href="#">gi 18652302 gb AAL77056.1</a> SH2 phosphatase 1 [Rattus norvegicus]                                                        | <a href="#">6</a>  | 9.0 | 36.97 | <input type="checkbox"/> |
| 35  | 3.0×10 <sup>-3</sup> | <a href="#">gi 53734236 gb AAH83684.1</a> Calcium binding protein 39-like [Rattus norvegicus]                                          | <a href="#">7</a>  | 8.6 | 40.87 | <input type="checkbox"/> |
| 36  | 3.0×10 <sup>-3</sup> | <a href="#">gi 15077853 gb AAK83379.1 AF395897_1</a> phosphatidylinositol 3-kinase alpha catalytic subunit [Rattus norvegicus]         | <a href="#">5</a>  | 7.3 | 35.24 | <input type="checkbox"/> |
| 37  | 3.0×10 <sup>-3</sup> | <a href="#">gi 38511542 gb AAH61802.1</a> Fibp protein [Rattus norvegicus]                                                             | <a href="#">9</a>  | 6.3 | 42.47 | <input type="checkbox"/> |
| 38  | 3.2×10 <sup>-3</sup> | <a href="#">gi 18034789 ref NP_542151.1</a> phosphorylase kinase, gamma 2 (testis) [Rattus norvegicus]                                 | <a href="#">10</a> | 6.4 | 47.77 | <input type="checkbox"/> |



|    |                      |                                                                                                                                                        |                    |     |       |                          |
|----|----------------------|--------------------------------------------------------------------------------------------------------------------------------------------------------|--------------------|-----|-------|--------------------------|
| 39 | 3.5×10 <sup>-3</sup> | <a href="#">gi 8393215 ref NP_058770.1 </a> CTL target antigen [Rattus norvegicus]                                                                     | <a href="#">14</a> | 8.8 | 45.28 | <input type="checkbox"/> |
| 40 | 3.9×10 <sup>-3</sup> | <a href="#">gi 29293821 ref NP_808793.1 </a> platelet-activating factor acetylhydrolase 2 [Rattus norvegicus]                                          | <a href="#">12</a> | 6.2 | 44.77 | <input type="checkbox"/> |
| 41 | 4.4×10 <sup>-3</sup> | <a href="#">gi 25992750 gb AAN77242.1 </a> immunophilin XAP2 [Rattus norvegicus]                                                                       | <a href="#">7</a>  | 6.1 | 39.06 | <input type="checkbox"/> |
| 42 | 6.0×10 <sup>-3</sup> | <a href="#">gi 8394076 ref NP_058979.1 </a> proteasome (prosome, macropain) subunit, alpha type 6 [Rattus norvegicus]                                  | <a href="#">8</a>  | 6.3 | 28.64 | <input type="checkbox"/> |
| 43 | 6.6×10 <sup>-3</sup> | <a href="#">gi 51260799 gb AAH79367.1 </a> Suclg2 protein [Rattus norvegicus]                                                                          | <a href="#">4</a>  | 7.7 | 48.57 | <input type="checkbox"/> |
| 44 | 9.8×10 <sup>-3</sup> | <a href="#">gi 1168286 sp P15651 ACADS_RAT</a> Short-chain specific acyl-CoA dehydrogenase, mitochondrial precursor (SCAD) (Butyryl-CoA dehydrogenase) | <a href="#">8</a>  | 8.7 | 45.96 | <input type="checkbox"/> |
| 45 | 0.010                | <a href="#">gi 11968090 ref NP_071957.1 </a> acyl-coenzyme A dehydrogenase, short chain [Rattus norvegicus]                                            | <a href="#">7</a>  | 8.7 | 46.16 | <input type="checkbox"/> |
| 46 | 0.013                | <a href="#">gi 33638215 gb AAQ24208.1 </a> serine/threonine kinase 22A [Rattus norvegicus]                                                             | <a href="#">6</a>  | 7.8 | 43.15 | <input type="checkbox"/> |
| 47 | 0.013                | <a href="#">gi 112412 pir B39533</a> transcription factor HNF-3 beta - rat                                                                             | <a href="#">10</a> | 8.9 | 49.44 | <input type="checkbox"/> |
| 48 | 0.014                | <a href="#">gi 57527408 ref NP_001009599.1 </a> ATP/GTP-binding protein [Rattus norvegicus]                                                            | <a href="#">7</a>  | 6.2 | 49.06 | <input type="checkbox"/> |
| 49 | 0.025                | <a href="#">gi 34853071 ref XP_345133.1 </a> PREDICTED: similar to C03A3.3 [Rattus norvegicus]                                                         | <a href="#">10</a> | 6.4 | 31.69 | <input type="checkbox"/> |

## NOTE:

1. To search again using [unmatched masses](#), click the symbol .
2. Highly similar protein sequences were given the same rank (click "+" to expand/contract).

**Input Summary****Search id** AE91AC89-0BB0-5EA924F1**Sequences** 20092**Date & Time** Mon Jan 29 19:15:18 2007 UTC (Search Time: 0.36 sec.)**Sample ID** 20061228 richardson NIA set 1 spot 7410, 20070128, cleaned data search 1**Database** NCBIInr [..\databases\nr]**Taxonomy** Rattus**Mass Range** 20 - 50 kDa**pI Range** 6.0 -9.0**Digestion** Trypsin**Missed Cuts** 0**Modifications** +C2H3ON@C(Complete); +O@M(Partial); +CH2N2@K(Complete);**Charge State** MH+**Masses (avg)****Tolerance (avg)** 1.00 ppm

**Masses (mon)** 632.256 634.272 646.273 654.391 660.288 662.303 677.306 684.283 699.222  
719.378 724.766 725.773 747.409 802.260 804.273 811.412 817.420 824.494  
830.290 832.305 847.316 854.284 862.282 876.272 884.345 894.224 912.512  
918.461 948.521 976.546 990.542 1004.542 1028.540 1058.520 1075.572  
1211.575 1215.637 1220.593 1224.580 1230.668 1233.649 1237.616 1239.726  
1244.581 1257.751 1262.604 1301.615 1313.626 1316.620 1323.666 1330.600  
1411.743 1432.691 1454.762 1497.755 1499.767 1538.780 1543.729 1556.800  
1573.778 1610.921 1628.933 1652.937 1670.955 1685.938 1783.801 1791.789  
1795.802 1808.804 1862.893 1879.870 1891.845 1897.909 1941.903 2152.047  
2159.044 2172.049 2181.081 2222.120 2223.117 2242.136 2243.135 2286.128  
2287.111 2306.142 2324.172 2365.133 2366.149 2378.128 2379.159 2392.139  
2400.175 2401.172 2417.134 2425.181 2431.139 2432.117 2437.179 2442.184  
2443.193 2452.173 2453.186 2460.175 2465.174 2466.175 2479.157 2483.178  
2484.217 2502.238 2503.234 2511.266 2512.196 2526.223 2537.173 2538.193  
2546.197 2547.232 2555.170 2556.225 2592.261 2593.262 2611.294 2612.336  
2622.215 2628.177 2629.256 2635.290 2636.332 2653.352 2668.313 2669.330  
2684.299 2685.317 2694.240 2695.237 2711.296 2722.258 2723.240 2733.234  
2734.227 2741.247 2764.212 2924.366 2937.278 3028.389 3029.438 3034.365  
3035.354 3041.365 3048.394 3049.396 3066.372 3067.379 3077.404 3084.405  
3085.425 3095.432 3112.435 3136.459 3147.452 3148.486 3179.463 3187.435  
3202.488 3211.481 3212.472 3220.511 3230.520 3242.460 3244.452 3260.501  
3273.631 3274.464 3290.715 3297.434 3307.524 3308.579 3314.522 3336.666  
3337.661 3353.679 3354.680 3369.585 3383.547 3399.525 3400.550 3417.554  
3429.522 3435.592 3446.607 3447.522 3464.579 3465.701 3486.605 3488.572  
3512.612 3549.620 3572.646 3726.717 3919.819 3936.791 3944.754 3957.812  
3974.833 3985.899 3999.854 4004.776 4017.851 4033.831 4051.788 4057.891  
4065.920 4076.891 4094.850 4109.868 4126.994 4138.845 4152.506 4172.142  
4186.700 4193.258 4204.042 4504.430 4520.763 4564.889

**Tolerance (mon)** 22.00 ppm

**Number of Peptides** 225

# Laboratory of Mass Spectrometry and Gaseous Ion Chemistry

## PROWL

- **ProFound**
- **ProteinInfo**
- **PeptideMap**
- **PepFrag**
- **X! Tandem**
- **X! Hunter**
- **GPMDB**
- **PROWL Home**
- **Chait Lab**

## ProFound



### Protein Candidates

| Rank | Expectation           | Protein Information and Sequence Analyse Tools (T)                                                                                            | %  | pI  | kDa   | R |
|------|-----------------------|-----------------------------------------------------------------------------------------------------------------------------------------------|----|-----|-------|---|
| 1    | $7.2 \times 10^{-34}$ | gi 125313 sp P09605 KCRS_RAT Creatine kinase, sarcomeric mitochondrial precursor (S-MtCK) (Mib-CK) (Basic-type mitochondrial creatine kinase) | 12 | 9.2 | 48.87 | ● |
| +2   | $1.6 \times 10^{-18}$ | gi 33112416 sp Q8R415 PKR2_RAT Prokineticin receptor 2 (PK-R2) (G-protein coupled receptor 73-like 1) (G-protein coupled receptor I5E)        | 12 | 9.1 | 45.05 | ● |
|      | -                     | gi 20376824 ref NP_620434.1  prokineticin receptor 2 [Rattus norvegicus]                                                                      | 11 | 8.9 | 49.38 | ● |
| 3    | $4.1 \times 10^{-16}$ | gi 11560103 ref NP_071613.1  caspase 8 [Rattus norvegicus]                                                                                    | 13 | 5.3 | 57.68 | ● |
| 4    | $5.3 \times 10^{-16}$ | gi 27704688 ref XP_215924.1  PREDICTED: similar to ubiquitin-conjugating enzyme E2C [Rattus norvegicus]                                       | 17 | 6.8 | 20.34 | ● |
| 5    | $7.5 \times 10^{-15}$ | gi 34857062 ref XP_227247.2  PREDICTED: similar to protein phosphatase 1 (formerly 2C)-like [Rattus norvegicus]                               | 10 | 5.6 | 42.30 | ● |
| 6    | $1.2 \times 10^{-13}$ | gi 1587133 prf  2206275A neuronal Glu transporter EAAC1                                                                                       | 9  | 5.8 | 56.97 | ● |
| 7    | $9.7 \times 10^{-13}$ | gi 16758258 ref NP_445951.1  mitochondrial transcription termination factor 1 [Rattus norvegicus]                                             | 9  | 9.8 | 44.47 | ● |
| 8    | $1.7 \times 10^{-12}$ | gi 56788784 gb AAH88432.1  Membrane targeting (tandem) C2 domain containing 1 [Rattus norvegicus]                                             | 6  | 9.5 | 57.38 | ● |
| 9    | $2.3 \times 10^{-10}$ | gi 6002248 emb CAB56708.1  elongation factor [Rattus rattus]                                                                                  | 15 | 6.0 | 36.27 | ● |
| 10   | $3.2 \times 10^{-10}$ | gi 47576821 ref NP_001000117.1  olfactory receptor Olr19 [Rattus norvegicus]                                                                  | 16 | 9.7 | 36.94 | ● |
| 11   | $4.5 \times 10^{-10}$ | gi 56057 emb CAA42519.1  decorin [Rattus norvegicus]                                                                                          | 12 | 9.2 | 40.09 | ● |
| 12   | $3.1 \times 10^{-9}$  | gi 112412 pir  B39533 transcription factor HNF-3 beta - rat                                                                                   | 12 | 8.9 | 49.44 | ● |
| 13   | $5.7 \times 10^{-9}$  | gi 423679 pir  S33175 hydroxymethylglutaryl-CoA reductase (NADPH2) (EC 1.1.1.34) - rat (fragment)                                             | 14 | 9.3 | 25.96 | ● |



The Rockefeller University  
1230 York Avenue,  
New York, NY 10021  
(212) 327-8000



**National Center for  
Research Resources**

National Resource  
for the Mass Spectrometric  
Analysis of Biological  
Macromolecules

|    |                      |                                                                                                                                                                                 |    |     |       |  |
|----|----------------------|---------------------------------------------------------------------------------------------------------------------------------------------------------------------------------|----|-----|-------|--|
| 14 | $8.3 \times 10^{-9}$ | <a href="#">gi 53733823 gb AAH83596.1 </a> Rexo1 protein [Rattus norvegicus]                                                                                                    | 11 | 9.5 | 58.82 |  |
| 15 | $8.6 \times 10^{-9}$ | <a href="#">gi 205224 gb AAA41535.1 </a> link protein (0.8 kd)                                                                                                                  | 11 | 9.8 | 33.86 |  |
| 16 | $1.4 \times 10^{-8}$ | <a href="#">gi 55391462 gb AAH85334.1 </a> Similar to BRI3-binding protein [Rattus norvegicus]                                                                                  | 19 | 9.4 | 28.72 |  |
| 17 | $2.2 \times 10^{-8}$ | <a href="#">gi 15011855 ref NP_058906.2 </a> deiodinase, iodothyronine, type III [Rattus norvegicus]                                                                            | 15 | 6.3 | 32.09 |  |
| 18 | $2.2 \times 10^{-8}$ | <a href="#">gi 1708507 sp P49897 IOD3_RAT</a> Type III iodothyronine deiodinase (Type-III 5' deiodinase) (DIOIII) (Type 3 DI) (5DIII)                                           | 15 | 6.3 | 32.25 |  |
| 19 | $2.3 \times 10^{-8}$ | <a href="#">gi 1346731 sp P03994 HPLN1_RAT</a> Hyaluronan and proteoglycan link protein 1 precursor (Proteoglycan link protein) (Cartilage link protein) (LP)                   | 13 | 8.7 | 41.63 |  |
| 20 | $2.4 \times 10^{-8}$ | <a href="#">gi 46577139 sp Q920M9 SIAH1_RAT</a> E3 ubiquitin-protein ligase SIAH1 (Seven in absentia homolog 1) (Siah-1) (Siah-1a)                                              | 10 | 6.4 | 32.57 |  |
| 21 | $3.2 \times 10^{-8}$ | <a href="#">gi 47577411 ref NP_001000290.1 </a> olfactory receptor Olr454 [Rattus norvegicus]                                                                                   | 14 | 5.3 | 35.73 |  |
| 22 | $3.8 \times 10^{-8}$ | <a href="#">gi 21542226 sp Q99MS0 S14L2_RAT</a> SEC14-like protein 2 (Alpha-tocopherol-associated protein) (TAP) (Supernatant protein factor) (SPF) (Squalene transfer protein) | 10 | 7.1 | 48.08 |  |
| 23 | $4.7 \times 10^{-8}$ | <a href="#">gi 53734557 gb AAH83841.1 </a> Kif2b protein [Rattus norvegicus]                                                                                                    | 7  | 9.9 | 42.74 |  |
| 24 | $5.1 \times 10^{-8}$ | <a href="#">gi 16758454 ref NP_446095.1 </a> phosphatidate cytidyltransferase 2 [Rattus norvegicus]                                                                             | 9  | 6.6 | 52.59 |  |
| 25 | $5.2 \times 10^{-8}$ | <a href="#">gi 47168545 pdb 1PK8 A</a> Chain A, Crystal Structure Of Rat Synapsin I C Domain Complexed To Ca.Atp                                                                | 6  | 7.9 | 46.65 |  |
| 26 | $6.8 \times 10^{-8}$ | <a href="#">gi 16758340 ref NP_446020.1 </a> phosphate cytidyltransferase 2, ethanolamine [Rattus norvegicus]                                                                   | 8  | 6.2 | 46.68 |  |
| 27 | $9.3 \times 10^{-8}$ | <a href="#">gi 50925459 gb AAH78772.1 </a> Pcyt2 protein [Rattus norvegicus]                                                                                                    | 9  | 6.4 | 44.89 |  |
| 28 | $1.1 \times 10^{-7}$ | <a href="#">gi 51259441 gb AAH79370.1 </a> LOC498909 protein [Rattus norvegicus]                                                                                                | 6  | 5.5 | 35.35 |  |
| 29 | $1.1 \times 10^{-7}$ | <a href="#">gi 204617 gb AAA41335.1 </a> hepatic lipase precursor                                                                                                               | 6  | 8.9 | 57.64 |  |
| 30 | $1.1 \times 10^{-7}$ | <a href="#">gi 56961643 ref NP_036729.2 </a> lipase, hepatic [Rattus norvegicus]                                                                                                | 6  | 9.0 | 57.76 |  |

|    |                      |                                                                                                                                                                                               |    |     |       |  |
|----|----------------------|-----------------------------------------------------------------------------------------------------------------------------------------------------------------------------------------------|----|-----|-------|--|
| 31 | $1.2 \times 10^{-7}$ | <a href="#">gi 126310 sp P07867 LIPC_RAT</a> Hepatic triacylglycerol lipase precursor (Hepatic lipase) (HL) (Lipase member C)                                                                 | 6  | 8.9 | 57.59 |  |
| 32 | $1.4 \times 10^{-7}$ | <a href="#">gi 27669155 ref XP_234521.1</a> PREDICTED: similar to 60S ribosomal protein L9 [Rattus norvegicus]                                                                                | 6  | 9.2 | 22.72 |  |
| 33 | $1.4 \times 10^{-7}$ | <a href="#">gi 34878862 ref XP_226016.2</a> PREDICTED: similar to Transcriptional activator protein Pur-alpha (Purine-rich single-stranded DNA-binding protein alpha) [Rattus norvegicus]     | 12 | 6.1 | 35.82 |  |
| 34 | $1.7 \times 10^{-7}$ | <a href="#">gi 55250082 gb AAH85831.1</a> F-box only protein 9 [Rattus norvegicus]                                                                                                            | 11 | 6.7 | 52.03 |  |
| 35 | $1.8 \times 10^{-7}$ | <a href="#">gi 48428498 sp P61943 SIA10_RAT</a> Type 2 lactosamine alpha-2,3-sialyltransferase (CMP-NeuAc:beta-galactoside alpha-2,3-sialyltransferase VI) (ST3Gal VI) (Sialyltransferase 10) | 8  | 9.7 | 39.87 |  |
| 36 | $1.9 \times 10^{-7}$ | <a href="#">gi 204050 gb AAA41122.1</a> c-erbA-alpha-2 protein                                                                                                                                | 8  | 5.7 | 42.82 |  |
| 37 | $2.4 \times 10^{-7}$ | <a href="#">gi 38454206 ref NP_942025.1</a> proteasome, 26S, non-ATPase regulatory subunit 6 [Rattus norvegicus]                                                                              | 10 | 5.4 | 46.96 |  |
| 38 | $2.6 \times 10^{-7}$ | <a href="#">gi 1085788 pir  S42633</a> Fit-1M protein - rat                                                                                                                                   | 5  | 9.5 | 29.34 |  |
| 39 | $4.0 \times 10^{-7}$ | <a href="#">gi 55391506 gb AAH85357.1</a> Fgl2 protein [Rattus norvegicus]                                                                                                                    | 5  | 6.7 | 49.60 |  |
| 40 | $4.1 \times 10^{-7}$ | <a href="#">gi 55715693 gb AAH85942.1</a> Tripartite motif protein 35 [Rattus norvegicus]                                                                                                     | 5  | 6.7 | 59.65 |  |
| 41 | $4.8 \times 10^{-7}$ | <a href="#">gi 54035396 gb AAH83846.1</a> Similar to RIKEN cDNA 2310057M21 [Rattus norvegicus]                                                                                                | 5  | 6.5 | 50.52 |  |
| 42 | $6.7 \times 10^{-7}$ | <a href="#">gi 741803 prf  2008147A</a> protein RAKb                                                                                                                                          | 12 | 7.9 | 38.13 |  |
| 43 | $7.3 \times 10^{-7}$ | <a href="#">gi 16758742 ref NP_446326.1</a> CAP, adenylate cyclase-associated protein, 2 [Rattus norvegicus]                                                                                  | 6  | 6.7 | 54.57 |  |
| 44 | $7.5 \times 10^{-7}$ | <a href="#">gi 56090443 ref NP_001007675.1</a> solute carrier family 25 (mitochondrial deoxynucleotide carrier), member 19 [Rattus norvegicus]                                                | 7  | 9.8 | 36.69 |  |
| 45 | $8.4 \times 10^{-7}$ | <a href="#">gi 27678054 ref XP_225656.1</a> PREDICTED: similar to melanoma antigen family A, 10 [Rattus norvegicus]                                                                           | 5  | 5.1 | 34.46 |  |
| 46 | $1.1 \times 10^{-6}$ | <a href="#">gi 55932 emb CAA31237.1</a> c-erb-A thyroid hormone receptor [Rattus norvegicus]                                                                                                  | 7  | 8.5 | 47.84 |  |
| 47 | $1.2 \times 10^{-6}$ | <a href="#">gi 112393 pir  S09178</a> thyroid hormone receptor alpha - rat                                                                                                                    | 7  | 8.8 | 49.36 |  |
| 48 | $1.2 \times 10^{-6}$ | <a href="#">gi 72121 pir  TVRTAR</a> thyroid hormone receptor alpha-2 - rat                                                                                                                   | 6  | 6.4 | 53.06 |  |

|    |                      |                                                                                                                       |    |     |       |  |
|----|----------------------|-----------------------------------------------------------------------------------------------------------------------|----|-----|-------|--|
| 49 | $1.3 \times 10^{-6}$ | <a href="#">gi 45680894 gb AAS75316.1</a> non-specific dipeptidase [Rattus norvegicus]                                | 5  | 5.4 | 54.69 |  |
| 50 | $1.3 \times 10^{-6}$ | <a href="#">gi 226130 prf  1411299A</a> thyroid hormone receptor alpha 1                                              | 7  | 9.2 | 49.16 |  |
| 51 | $1.6 \times 10^{-6}$ | <a href="#">gi 92879 pir  S06907</a> thyroid hormone receptor alpha-2 (clone rTRalpha2) - rat                         | 6  | 6.5 | 57.81 |  |
| 52 | $1.6 \times 10^{-6}$ | <a href="#">gi 54035348 gb AAH83887.1</a> Similar to RIKEN cDNA 4930563D23 [Rattus norvegicus]                        | 18 | 9.5 | 30.61 |  |
| 53 | $1.7 \times 10^{-6}$ | <a href="#">gi 226131 prf  1411299B</a> thyroid hormone receptor alpha 2                                              | 6  | 6.3 | 57.77 |  |
| 54 | $1.8 \times 10^{-6}$ | <a href="#">gi 4887597 dbj BAA77793.1</a> organic anion transporter-K2 [Rattus norvegicus]                            | 5  | 9.0 | 57.87 |  |
| 55 | $1.8 \times 10^{-6}$ | <a href="#">gi 204048 gb AAA41121.1</a> c-erbA-alpha-2-related protein                                                | 6  | 6.9 | 57.71 |  |
| 56 | $1.8 \times 10^{-6}$ | <a href="#">gi 52001262 sp P63059 THA_RAT</a> Thyroid hormone receptor alpha (C-erbA-alpha) (c-erbA-1)                | 6  | 6.9 | 57.59 |  |
| 57 | $2.3 \times 10^{-6}$ | <a href="#">gi 57526873 ref NP_001009629.1</a> replication factor C (activator 1) 3 [Rattus norvegicus]               | 6  | 9.3 | 42.25 |  |
| 58 | $2.4 \times 10^{-6}$ | <a href="#">gi 42409519 ref NP_955792.1</a> keratin complex 1, acidic, gene 19 [Rattus norvegicus]                    | 5  | 5.2 | 45.42 |  |
| 59 | $2.7 \times 10^{-6}$ | <a href="#">gi 47576187 ref NP_001000484.1</a> olfactory receptor Olr1349 [Rattus norvegicus]                         | 10 | 9.4 | 35.56 |  |
| 60 | $3.0 \times 10^{-6}$ | <a href="#">gi 56788780 gb AAH88424.1</a> Krt1-19 protein [Rattus norvegicus]                                         | 5  | 5.3 | 47.48 |  |
| 61 | $4.3 \times 10^{-6}$ | <a href="#">gi 13540632 ref NP_110461.1</a> monocarboxylate transporter [Rattus norvegicus]                           | 3  | 8.9 | 51.96 |  |
| 62 | $8.5 \times 10^{-6}$ | <a href="#">gi 56268852 gb AAH87064.1</a> Cytotoxic granule-associated RNA binding protein 1 [Rattus norvegicus]      | 7  | 7.8 | 42.72 |  |
| 63 | $9.4 \times 10^{-6}$ | <a href="#">gi 27465631 ref NP_775174.1</a> phosphate cytidyltransferase 1, choline, beta isoform [Rattus norvegicus] | 4  | 6.0 | 43.22 |  |
| 64 | $9.4 \times 10^{-6}$ | <a href="#">gi 53734533 gb AAH83705.1</a> Prohibitin 2 [Rattus norvegicus]                                            | 5  | 9.8 | 34.09 |  |
| 65 | $1.3 \times 10^{-5}$ | <a href="#">gi 47576237 ref NP_001001087.1</a> olfactory receptor Olr1318 [Rattus norvegicus]                         | 7  | 9.1 | 35.26 |  |
| 66 | $2.3 \times 10^{-5}$ | <a href="#">gi 47577743 ref NP_001000596.1</a> olfactory receptor Olr1257 [Rattus norvegicus]                         | 7  | 9.4 | 36.39 |  |

|    |                      |                                                                                                                                                                                  |    |     |       |  |
|----|----------------------|----------------------------------------------------------------------------------------------------------------------------------------------------------------------------------|----|-----|-------|--|
| 67 | $3.2 \times 10^{-5}$ | <a href="#">gi 51858754 gb AAH82080.1</a>   Fibrous sheath interacting protein 1 [Rattus norvegicus]                                                                             | 5  | 5.0 | 51.43 |  |
| 68 | $3.3 \times 10^{-5}$ | <a href="#">gi 16757980 ref NP_445740.1</a>   orosomuroid 1 [Rattus norvegicus]                                                                                                  | 8  | 5.6 | 24.53 |  |
| 69 | $3.4 \times 10^{-5}$ | <a href="#">gi 24308492 ref NP_714948.1</a>   Ly-49 stimulatory receptor 3 [Rattus norvegicus]                                                                                   | 6  | 9.2 | 34.31 |  |
| 70 | $3.4 \times 10^{-5}$ | <a href="#">gi 117465 sp P02529 CRGC_RAT</a> Gamma crystallin C (Gamma crystallin 2-1)                                                                                           | 13 | 7.9 | 21.61 |  |
| 71 | $3.4 \times 10^{-5}$ | <a href="#">gi 203633 gb AAA40986.1</a>   gamma-crystallin                                                                                                                       | 13 | 6.9 | 20.97 |  |
| 72 | $3.4 \times 10^{-5}$ | <a href="#">gi 92259 pir  C24060</a> gamma-crystallin 2-1 - rat                                                                                                                  | 13 | 7.9 | 21.60 |  |
| 73 | $4.1 \times 10^{-5}$ | <a href="#">gi 18426866 ref NP_569117.1</a>   acetyl-Coenzyme A acyltransferase 2 (mitochondrial 3-oxoacyl-Coenzyme A thiolase) [Rattus norvegicus]                              | 9  | 8.4 | 43.22 |  |
| 74 | $4.1 \times 10^{-5}$ | <a href="#">gi 56786134 gb AAW29194.1</a>   Ly49 stimulatory receptor 3 variant [Rattus norvegicus]                                                                              | 6  | 9.4 | 35.82 |  |
| 75 | $4.9 \times 10^{-5}$ | <a href="#">gi 117463 sp P10066 CRGB_RAT</a> Gamma crystallin B (Gamma crystallin 1-2)                                                                                           | 13 | 7.9 | 21.61 |  |
| 76 | $6.7 \times 10^{-5}$ | <a href="#">gi 51858723 gb AAH82012.1</a>   Hypothetical protein LOC690783 [Rattus norvegicus]                                                                                   | 5  | 5.8 | 35.25 |  |
| 77 | $6.7 \times 10^{-5}$ | <a href="#">gi 13592043 ref NP_112357.1</a>   renin binding protein [Rattus norvegicus]                                                                                          | 4  | 5.6 | 49.70 |  |
| 78 | $8.4 \times 10^{-5}$ | <a href="#">gi 14009486 gb AAK51627.1 AF255886_1</a> adapter protein RUK-m1 [Rattus norvegicus]                                                                                  | 7  | 9.1 | 46.13 |  |
| 79 | $1.2 \times 10^{-4}$ | <a href="#">gi 14009488 gb AAK51628.1 AF255887_1</a> adapter protein RUK-m3 [Rattus norvegicus]                                                                                  | 6  | 9.0 | 48.65 |  |
| 80 | $2.0 \times 10^{-4}$ | <a href="#">gi 3183109 sp Q63065 PDK1_RAT</a> [Pyruvate dehydrogenase [lipoamide]] kinase isozyme 1, mitochondrial precursor (Pyruvate dehydrogenase kinase isoform 1) (PDK p48) | 7  | 8.4 | 50.25 |  |
| 81 | $2.2 \times 10^{-4}$ | <a href="#">gi 27698122 ref XP_223674.1</a>   PREDICTED: similar to UDP-GlcNAc:betaGal beta-1,3-N-acetylglucosaminyltransferase 1 [Rattus norvegicus]                            | 8  | 9.5 | 47.78 |  |
| 82 | $2.2 \times 10^{-4}$ | <a href="#">gi 47577461 ref NP_001001125.1</a>   olfactory receptor Olr471 [Rattus norvegicus]                                                                                   | 7  | 9.7 | 36.79 |  |

|    |                      |                                                                                                                                         |    |     |       |  |
|----|----------------------|-----------------------------------------------------------------------------------------------------------------------------------------|----|-----|-------|--|
| 83 | $4.9 \times 10^{-4}$ | <a href="#">gi 47576233 ref NP_001000471.1 </a> olfactory receptor Olf1320 [Rattus norvegicus]                                          | 7  | 9.6 | 36.56 |  |
| 84 | $6.8 \times 10^{-4}$ | <a href="#">gi 12408306 ref NP_074046.1 </a> casein kinase 1, gamma 3 [Rattus norvegicus]                                               | 8  | 9.4 | 53.32 |  |
| 85 | $8.8 \times 10^{-4}$ | <a href="#">gi 206515 gb AAA41988.1 </a> quinone reductase (EC 1.6.99.2)                                                                | 12 | 6.5 | 29.50 |  |
| 86 | $2.7 \times 10^{-3}$ | <a href="#">gi 206734 gb AAA42074.1 </a> ribosomal protein L5                                                                           | 4  | 9.9 | 35.93 |  |
| 87 | $2.8 \times 10^{-3}$ | <a href="#">gi 12621142 ref NP_075248.1 </a> peptidylglycine alpha-amidating monooxygenase COOH-terminal interactor [Rattus norvegicus] | 4  | 5.2 | 51.50 |  |
| 88 | $3.2 \times 10^{-3}$ | <a href="#">gi 13592051 ref NP_112361.1 </a> ribosomal protein L5 [Rattus norvegicus]                                                   | 4  | 9.9 | 36.06 |  |

## NOTE:

1. To search again using **unmatched masses**, click the symbol .
2. Highly similar protein sequences were given the same rank (click "+" to expand/contract).

**Input Summary****Search id** B40485DF-0634-64252A39**Sequences** 20076**Date & Time** Mon Feb 05 18:14:05 2007 UTC (Search Time: 0.31 sec.)**Sample ID** 20061228 richardson NIA set 1 spot 7507 CONSENSUS search 1**Database** NCBI nr [..\databases\nr]**Taxonomy** Rattus**Mass Range** 20 - 60 kDa**pI Range** 5.0 -10.0**Digestion** Trypsin**Missed Cuts** 0**Modifications** +C2H3ON@C(Complete); +O@M(Partial); +HPO3@Y (Partial); +CH2N2@K(Complete);**Charge State** MH+**Masses (avg)****Tolerance (avg)** 1.00 ppm



**Masses (mon)** 615.633 626.649 628.603 629.635 654.683 655.682 656.637  
657.660 668.681 682.714 684.669 696.736 710.750 719.385  
722.753 724.769 725.773 726.774 738.784 739.776 740.764  
753.804 766.813 767.799 768.791 769.824 778.813 795.818  
797.855 811.870 824.498 852.524 857.893 918.461 920.462  
948.524 955.506 990.548 1005.526 1027.551 1057.543  
1084.514 1102.527 1107.628 1215.638 1217.641 1220.593  
1224.587 1233.647 1244.595 1247.618 1262.611 1280.652  
1330.608 1372.687 1375.682 1380.613 1383.724 1388.685  
1390.698 1401.747 1432.721 1450.697 1456.723 1482.694  
1528.829 1542.788 1547.748 1559.791 1568.770 1584.780  
1666.785 1684.827 1735.901 1756.865 1762.835 1779.870  
1785.845 1828.876 1892.888 1908.894 1911.892 1927.870  
1963.912 2016.919 2017.955 2046.980 2047.986 2052.975  
2053.990 2072.995 2091.036 2122.033 2138.041 2183.087  
2191.086 2241.123 2242.143 2290.142 2297.174 2324.186  
2341.203 2363.160 2364.131 2374.208 2390.186 2398.135  
2417.268 2422.219 2435.213 2443.225 2444.174 2458.185  
2497.209 2508.238 2514.243 2526.227 2533.229 2534.143  
2541.213 2582.294 2605.174 2614.263 2632.300 2638.233  
2639.259 2648.264 2776.263 2817.331 2819.298 2835.269  
2894.325 2924.391 2937.396 2938.410 3059.386 3077.516  
3095.402 3096.478 3105.484 3114.487 3122.443 3136.466  
3179.472 3187.540 3188.479 3202.492 3203.490 3212.465  
3213.455 3220.498 3230.529 3244.498 3245.547 3250.483  
3261.581 3262.528 3274.486 3275.530 3287.656 3288.539  
3298.437 3306.482 3307.432 3316.486 3326.642 3335.496  
3336.679 3350.504 3352.472 3366.466 3367.591 3377.551  
3385.615 3404.421 3414.660 3426.494 3427.685 3445.594  
3455.591 3464.541 3491.590 3614.661 3823.734

**Tolerance** 8.00 ppm  
**(mon)**

**Number of** 184  
**Peptides**

PROWL

## ProFound

- [ProFound](#)
- [ProteinInfo](#)
- [PeptideMap](#)
- [PepFrag](#)
- [X! Tandem](#)
- [X! Hunter](#)
- [GPMDB](#)
- [PROWL Home](#)
- [Chait Lab](#)

The Rockefeller  
University

The Rockefeller University  
1230 York Avenue,  
New York, NY 10021  
(212) 327-8000

National Center of  
Research Resources

National Resource  
for the Mass Spectrometric  
Analysis of Biological  
Macromolecules

## Protein Candidates

| Rank | Expectation          | Protein Information and Sequence Analyse Tools (T)                                                                                                                                                           | %                  | pI  | kDa   | R                        |
|------|----------------------|--------------------------------------------------------------------------------------------------------------------------------------------------------------------------------------------------------------|--------------------|-----|-------|--------------------------|
| 1    | 2.0×10 <sup>-9</sup> | <a href="#">gi 29692074 gb AAO89062.1 </a> phosphoserine aminotransferase [Rattus norvegicus]                                                                                                                | <a href="#">13</a> | 8.5 | 41.92 | <input type="checkbox"/> |
| 2    | 1.1×10 <sup>-5</sup> | <a href="#">gi 47577087 ref NP_001000765.1 </a> olfactory receptor Olr310 [Rattus norvegicus]                                                                                                                | <a href="#">17</a> | 8.9 | 35.35 | <input type="checkbox"/> |
| 3    | 1.2×10 <sup>-5</sup> | <a href="#">gi 47577593 ref NP_001000674.1 </a> olfactory receptor Olr529 [Rattus norvegicus]                                                                                                                | <a href="#">16</a> | 8.9 | 36.36 | <input type="checkbox"/> |
| 4    | 1.6×10 <sup>-5</sup> | <a href="#">gi 3915863 sp P52847 ST1B1_RAT</a> Sulfotransferase family cytosolic 1B member 1 (Sulfotransferase 1B1) (DOPA/tyrosine sulfotransferase)                                                         | <a href="#">13</a> | 8.4 | 36.39 | <input type="checkbox"/> |
| 5    | 2.1×10 <sup>-5</sup> | <a href="#">gi 23096094 dbj BAC16247.1 </a> histo-blood group ABO transferase [Rattus norvegicus]                                                                                                            | <a href="#">15</a> | 8.9 | 41.47 | <input type="checkbox"/> |
| 6    | 6.2×10 <sup>-5</sup> | <a href="#">gi 741803 prf 2008147A</a> protein RAKb                                                                                                                                                          | <a href="#">12</a> | 7.9 | 38.13 | <input type="checkbox"/> |
| 7    | 7.6×10 <sup>-5</sup> | <a href="#">gi 34867618 ref XP_217013.2 </a> PREDICTED: similar to Protein PP2447 [Rattus norvegicus]                                                                                                        | <a href="#">11</a> | 8.8 | 43.42 | <input type="checkbox"/> |
| 8    | 8.1×10 <sup>-5</sup> | <a href="#">gi 8392858 ref NP_058966.1 </a> alcohol dehydrogenase 4 (class II), pi polypeptide [Rattus norvegicus]                                                                                           | <a href="#">13</a> | 8.8 | 42.59 | <input type="checkbox"/> |
| 9    | 8.2×10 <sup>-5</sup> | <a href="#">gi 27692082 ref XP_227314.1 </a> PREDICTED: similar to Secreted frizzled-related protein 2 precursor (sFRP-2) (Secreted apoptosis-related protein 1) (SARP-1) (SDF5 protein) [Rattus norvegicus] | <a href="#">12</a> | 8.5 | 35.60 | <input type="checkbox"/> |
| 10   | 9.3×10 <sup>-5</sup> | <a href="#">gi 34876257 ref XP_237907.2 </a> PREDICTED: similar to transmembrane 7 superfamily member 1 [Rattus norvegicus]                                                                                  | <a href="#">5</a>  | 8.9 | 45.16 | <input type="checkbox"/> |
| 11   | 9.7×10 <sup>-5</sup> | <a href="#">gi 2499598 sp Q63454 MK04_RAT</a> Mitogen-activated protein kinase 4 (Extracellular signal-regulated kinase 4) (ERK-4) (MAP kinase isoform p63) (p63-MAPK) (MNK2)                                | <a href="#">9</a>  | 8.0 | 32.21 | <input type="checkbox"/> |
| 12   | 1.3×10 <sup>-4</sup> | <a href="#">gi 1346731 sp P03994 HPLN1_RAT</a> Hyaluronan and proteoglycan link protein 1 precursor (Proteoglycan link protein) (Cartilage link protein) (LP)                                                | <a href="#">12</a> | 8.7 | 41.63 | <input type="checkbox"/> |
| 13   | 1.9×10 <sup>-4</sup> | <a href="#">gi 205390 gb AAA41592.1 </a> alpha-2-macroglobulin                                                                                                                                               | <a href="#">7</a>  | 8.8 | 26.31 | <input type="checkbox"/> |
| 14   | 2.9×10 <sup>-4</sup> | <a href="#">gi 50925685 gb AAH79101.1 </a> Ubiquitin specific peptidase 18 [Rattus norvegicus]                                                                                                               | <a href="#">7</a>  | 8.9 | 43.63 | <input type="checkbox"/> |
| 15   | 3.2×10 <sup>-4</sup> | <a href="#">gi 19773584 gb AAL98710.1 AF296761_1</a> putative blood group A transferase T1 [Rattus norvegicus]                                                                                               | <a href="#">12</a> | 8.7 | 36.71 | <input type="checkbox"/> |
| 16   | 5.0×10 <sup>-4</sup> | <a href="#">gi 50927021 gb AAH79217.1 </a> Similar to plasma kallikrein-like protein 4 precursor [Rattus norvegicus]                                                                                         | <a href="#">14</a> | 7.9 | 44.13 | <input type="checkbox"/> |

|    |                      |                                                                                                                                                              |                    |     |       |                          |
|----|----------------------|--------------------------------------------------------------------------------------------------------------------------------------------------------------|--------------------|-----|-------|--------------------------|
| 17 | 5.7×10 <sup>-4</sup> | <a href="#">gi 56090387 ref NP_001007704.1</a> hypothetical protein LOC313771 [Rattus norvegicus]                                                            | <a href="#">16</a> | 7.1 | 25.10 | <input type="checkbox"/> |
| 18 | 9.3×10 <sup>-4</sup> | <a href="#">gi 13591949 ref NP_112293.1</a> L-arginine: glycine amidinotransferase [Rattus norvegicus]                                                       | <a href="#">9</a>  | 7.2 | 49.75 | <input type="checkbox"/> |
| 19 | 2.3×10 <sup>-3</sup> | <a href="#">gi 112412 pir B39533</a> transcription factor HNF-3 beta - rat                                                                                   | <a href="#">12</a> | 8.9 | 49.44 | <input type="checkbox"/> |
| 20 | 0.019                | <a href="#">gi 51948426 ref NP_001004227.1</a> RNA terminal phosphate cyclase domain 1 [Rattus norvegicus]                                                   | <a href="#">13</a> | 7.9 | 40.63 | <input type="checkbox"/> |
| 21 | 0.93                 | <a href="#">gi 56961645 ref NP_112638.2</a> ficolin A [Rattus norvegicus]                                                                                    | <a href="#">15</a> | 7.9 | 37.87 | <input type="checkbox"/> |
| 22 | 0.93                 | <a href="#">gi 13124116 sp Q9WTS8 FCN1_RAT</a> Ficolin-1 precursor (Ficolin-A) (Ficolin-alpha) (M-ficolin) (Collagen/fibrinogen domain-containing protein 1) | <a href="#">15</a> | 7.9 | 37.89 | <input type="checkbox"/> |

## NOTE:

1. To search again using [unmatched masses](#), click the symbol .

**Input Summary****Search id** A7EC8695-1254-58051E4D**Sequences** 20092**Date & Time** Tue Jan 30 15:41:10 2007 UTC (Search Time: 0.30 sec.)**Sample ID** 20061228 richardson NIA set 1 spot 7508, 20070130, cleaned data search 2**Database** NCBIInr [..\databases\nr]**Taxonomy** Rattus**Mass Range** 25 - 52 kDa**pI Range** 7.0 -9.0**Digestion** Trypsin**Missed Cuts** 0**Modifications** +C2H3ON@C(Complete); +NO2-H@Y(Partial); +O@M(Partial); +CH2N2@K(Complete);**Charge State** MH+**Masses (avg)****Tolerance (avg)** 1.00 ppm

**Masses (mon)** 724.766 797.855 817.411 823.451 841.885 848.461 902.463 938.474 1001.367  
1046.497 1063.507 1080.491 1113.589 1211.581 1224.598 1288.611 1455.765  
1560.784 1584.789 1602.806 1771.871 1779.865 1794.846 1810.906 1837.859  
1855.885 1872.947 1896.908 1904.839 1908.910 1914.993 1929.934 1948.925  
1957.951 2024.958 2025.974 2047.988 2052.969 2072.990 2098.986 2122.013  
2150.030 2179.054 2180.052 2183.057 2191.088 2234.139 2276.149 2339.169  
2341.189 2349.154 2350.151 2364.139 2365.161 2376.162 2377.210 2381.162  
2382.168 2390.168 2419.177 2420.177 2422.187 2435.241 2450.190 2460.167  
2466.200 2467.223 2495.196 2504.157 2505.154 2514.183 2533.182 2534.177  
2548.198 2549.203 2553.209 2554.195 2561.198 2562.177 2591.199 2604.198  
2605.212 2609.218 2610.225 2633.176 2634.197 2647.228 2649.227 2657.193  
2658.212 2667.231 2668.222 2673.225 2674.207 2691.223 2692.212 2723.235  
2724.242 2729.244 2730.255 2734.256 2735.255 2743.260 2744.247 2748.250  
2749.274 2764.268 2765.280 2773.284 2783.271 2784.257 2788.271 2789.272  
2793.239 2794.290 2804.269 2805.265 2808.215 2809.261 2819.262 2820.296  
2832.274 2833.285 2837.308 2838.283 2849.292 2850.301 2866.311 2885.313  
2886.317 2889.310 2890.317 2896.327 2897.330 2906.330 2914.349 2949.362  
2959.403 2964.322 2965.365 2977.350 2978.341 2982.363 3001.493 3011.367  
3012.319 3018.370 3029.476 3034.374 3047.469 3060.375 3061.405 3075.406  
3083.362 3084.349 3092.373 3102.387 3103.400 3111.396 3112.378 3135.421  
3136.427 3172.458 3173.420 3180.480 3181.481 3198.468 3210.462 3228.455  
3262.457 3274.442 3275.471 3283.493 3309.524 3316.493 3325.480 3342.485  
3346.487 3347.562 3354.507 3355.470 3367.530 3368.537 3371.488 3372.527  
3382.519 3383.534 3391.528 3392.509 3399.519 3400.538 3406.537 3407.546  
3419.583 3435.532 3436.524 3447.548 3448.560 3461.562 3462.537 3467.479  
3468.572 3482.542 3483.543 3496.552 3497.518 3508.586 3517.594 3526.584  
3538.578 3550.593 3567.586 3577.590 3582.583 3593.640 3598.598 3602.606  
3614.638 3633.596 3649.610 3662.612 3667.623 3680.667 3698.641 3709.608  
3727.697 3742.616 3754.701 3763.697 3772.723 3786.780 3801.758 3811.724  
3819.771 3834.717 3843.767 3850.679 3861.742 3869.769 3875.765 3911.667  
4099.867 4112.837 4130.884 4149.936 4166.900 4207.943 4220.923 4259.975

**Tolerance (mon)** 8.00 ppm

**Number of Peptides** 249

# Laboratory of Mass Spectrometry and Gaseous Ion Chemistry

## PROWL

- ▶ **ProFound**
- ▶ **ProteinInfo**
- ▶ **PeptideMap**
- ▶ **PepFrag**
- ▶ **X! Tandem**
- ▶ **X! Hunter**
- ▶ **GPMDDB**
- ▶ **PROWL Home**
- ▶ **Chait Lab**

## ProFound



### Protein Candidates

| Rank | Expectation           | Protein Information and Sequence Analyse Tools (T)                                                                 | %  | pI  | kDa   | R |
|------|-----------------------|--------------------------------------------------------------------------------------------------------------------|----|-----|-------|---|
| 1    | $8.4 \times 10^{-13}$ | gi 25742635 ref NP_445768.1  inositol hexaphosphate kinase 1 [Rattus norvegicus]                                   | 37 | 6.8 | 51.03 | ● |
| +2   | $3.2 \times 10^{-6}$  | gi 204150 gb AAA41164.1  L-gulono-gamma-lactone oxidase precursor                                                  | 20 | 6.8 | 52.53 | ● |
| -    | -                     | gi 286224 dbj BAA02232.1  L-gulono-gamma-lactone oxidase [Rattus norvegicus]                                       | 20 | 7.1 | 52.57 | ● |
| -    | -                     | gi 3171998 emb CAA06510.1  collagen alpha 1 (III) [Rattus norvegicus]                                              | 28 | 6.7 | 58.05 | ● |
| -    | -                     | gi 13633872 sp P97588 SMAD1_RAT Mothers against decapentaplegic homolog 1 (SMAD 1) (Mothers against DPP homolog 1) | 17 | 6.9 | 54.50 | ● |
| -    | -                     | gi 51948528 ref NP_001004279.1  peptidylprolyl isomerase D [Rattus norvegicus]                                     | 26 | 6.7 | 42.83 | ● |
| -    | -                     | gi 16758316 ref NP_446002.1  phosphatidylinositol-4-phosphate 5-kinase, type II, beta [Rattus norvegicus]          | 29 | 7.2 | 49.20 | ● |
| -    | -                     | gi 50925699 gb AAH79114.1  Similar to Golgin 45 (Basic leucine zipper nuclear factor 1) [Rattus norvegicus]        | 25 | 7.0 | 46.59 | ● |
| -    | -                     | gi 40254783 ref NP_037262.2  SMAD, mothers against DPP homolog 1 [Rattus norvegicus]                               | 18 | 6.9 | 54.32 | ● |
| -    | -                     | gi 40385881 ref NP_954700.1  activin A receptor, type 1B [Rattus norvegicus]                                       | 16 | 6.6 | 58.77 | ● |
| -    | -                     | gi 16758354 ref NP_446034.1  lipocalin 7 [Rattus norvegicus]                                                       | 19 | 6.5 | 54.55 | ● |
| -    | -                     | gi 12621094 ref NP_075223.1  DnaJ-like protein 2 [Rattus norvegicus]                                               | 31 | 6.7 | 47.11 | ● |
| -    | -                     | gi 47933915 gb AAT39522.1  ankyrin repeat and SOCS box-containing protein 4 [Rattus norvegicus]                    | 22 | 7.1 | 50.34 | ● |



The Rockefeller University  
1230 York Avenue,  
New York, NY 10021  
(212) 327-8000



**National Center for  
Research Resources**

National Resource  
for the Mass Spectrometric  
Analysis of Biological  
Macromolecules

|   |                                                                                                                                                             |    |     |       |  |
|---|-------------------------------------------------------------------------------------------------------------------------------------------------------------|----|-----|-------|--|
| - | gi 7001384 gb AAF34874.1 AF168004_1 Parkin [Rattus norvegicus]                                                                                              | 23 | 6.7 | 53.81 |  |
| - | gi 6981322 ref NP_036853.1  purinergic receptor P2X-like 1 [Rattus norvegicus]                                                                              | 18 | 6.5 | 43.92 |  |
| - | gi 6981528 ref NP_036938.1  mitogen activated protein kinase 10 [Rattus norvegicus]                                                                         | 26 | 6.4 | 49.87 |  |
| - | gi 2507197 sp P49187 MK10_RAT Mitogen-activated protein kinase 10 (Stress-activated protein kinase JNK3) (c-Jun N-terminal kinase 3) (SAPK-beta) (p54-beta) | 23 | 6.4 | 54.51 |  |
| - | gi 18175301 gb AAK94870.1  IL-13 receptor alpha 1 [Rattus norvegicus]                                                                                       | 19 | 7.1 | 50.66 |  |
| - | gi 54400734 ref NP_001005883.1  phosphatidylinositol 4-kinase type-II beta [Rattus norvegicus]                                                              | 23 | 6.4 | 56.40 |  |
| - | gi 56605656 ref NP_001008288.1  downstream neighbor of SON [Rattus norvegicus]                                                                              | 19 | 6.9 | 55.52 |  |

## NOTE:

1. To search again using **unmatched masses**, click the symbol .
2. Highly similar protein sequences were given the same rank (click "+" to expand/contract).

**Input Summary****Search id** A6B33F1D-1388-A77E7FF2**Sequences** 20076**Date & Time** Sat Feb 03 15:42:18 2007 UTC (Search Time: 0.50 sec.)**Sample ID****Database** NCBI nr [..\databases\nr]**Taxonomy** Rattus**Mass Range** 40 - 60 kDa**pI Range** 6.3 -7.8**Digestion** Trypsin**Missed Cuts** 1**Modifications** +C2H3ON@C(Complete); +O@M(Partial); +CH2N2@K(Complete);**Charge State** MH+

**Masses (avg)****Tolerance (avg)** 1.00 ppm

**Masses (mon)** 663.306 841.472 878.439 902.482 1030.506 1063.508  
1119.567 1267.624 1315.602 1328.725 1557.734 1602.782  
1631.746 1695.783 1710.821 1736.822 1743.801 1751.829  
1756.860 1762.822 1780.856 1785.832 1891.888 1894.892  
1922.931 1931.905 1948.913 1964.911 1968.924 2004.920  
2005.927 2017.936 2018.937 2021.931 2025.958 2026.955  
2038.979 2039.977 2046.948 2047.951 2055.978 2056.960  
2080.979 2100.948 2101.973 2124.016 2125.006 2152.049  
2183.065 2209.092 2241.134 2242.136 2291.157 2298.154  
2306.135 2365.153 2366.157 2377.201 2382.137 2383.164  
2390.148 2397.158 2398.162 2435.240 2447.182 2448.165  
2460.173 2466.212 2467.182 2482.165 2483.228 2495.186  
2507.200 2516.195 2533.184 2534.179 2539.188 2540.208  
2549.177 2550.197 2559.187 2562.200 2563.217 2577.188  
2590.208 2591.183 2606.205 2607.217 2622.219 2630.197  
2631.225 2637.229 2638.227 2648.228 2649.231 2662.239  
2663.233 2670.236 2671.233 2683.232 2684.228 2690.181  
2691.232 2701.307 2702.229 2715.201 2716.260 2720.248  
2721.261 2731.217 2732.255 2741.273 2742.272 2749.305  
2760.292 2761.234 2766.316 2770.295 2771.372 2777.273  
2778.280 2783.264 2784.253 2795.286 2796.263 2802.295  
2808.295 2809.281 2817.282 2832.280 2836.263 2837.297  
2840.259 2841.289 2850.324 2851.380 2866.344 2882.342  
2887.307 2888.317 2892.319 2893.343 2914.382 2922.347  
2935.341 2936.321 2946.301 2947.281 2959.356 2960.344  
2964.349 2965.343 2980.362 2981.348 2995.371 2996.370  
3001.414 3003.439 3011.438 3012.309 3020.372 3021.359  
3029.544 3048.528 3065.420 3066.352 3077.479 3092.426  
3114.432 3149.475 3180.436 3181.466 3185.468 3202.456  
3203.456 3213.487 3220.489 3244.480 3245.465 3260.456  
3275.476 3276.482 3283.479 3284.500 3292.541 3301.509  
3308.483 3309.519 3313.477 3314.446 3326.491 3340.396  
3347.527 3348.551 3354.551 3355.538 3369.553 3373.542  
3374.532 3384.519 3385.524 3391.543 3392.547 3399.569  
3400.560 3408.542 3412.578 3413.530 3423.517 3431.524  
3440.537 3441.507 3452.496 3457.447 3458.566 3463.568  
3464.555 3477.487 3479.520 3484.482 3485.553 3500.549



|          |          |          |          |          |          |
|----------|----------|----------|----------|----------|----------|
| 3507.548 | 3517.575 | 3527.583 | 3531.649 | 3544.564 | 3550.659 |
| 3564.566 | 3575.634 | 3585.644 | 3592.567 | 3615.644 | 3622.638 |
| 3631.650 | 3643.609 | 3648.614 | 3667.685 | 3679.646 | 3699.724 |
| 3707.693 | 3722.661 | 3729.694 | 3746.649 | 3755.714 | 3762.723 |
| 3774.661 | 3779.662 | 3790.628 | 3803.740 | 3808.622 | 3810.594 |
| 3817.695 | 3822.714 | 3836.771 | 3841.682 | 3848.670 | 3860.682 |
| 3869.692 | 3890.671 | 3900.691 | 3906.789 | 3920.798 | 3932.696 |
| 3958.779 | 3982.775 | 4283.325 | 4520.663 |          |          |

**Tolerance** 36.00 ppm  
**(mon)**

**Number of** 268  
**Peptides**



PROWL

- [ProFound](#)
- [ProteinInfo](#)
- [PeptideMap](#)
- [PepFrag](#)
- [X! Tandem](#)
- [X! Hunter](#)
- [GPMDB](#)
- [PROWL Home](#)
- [Chait Lab](#)

The Rockefeller  
University

The Rockefeller University  
1230 York Avenue,  
New York, NY 10021  
(212) 327-8000

National Center of  
Research Resources

National Resource  
for the Mass Spectrometric  
Analysis of Biological  
Macromolecules

## ProFound

### Protein Candidates

| Rank | Expectation           | Protein Information and Sequence Analyse Tools (T)                                                                                                                                                                            | %                  | pI  | kDa   | R                        |
|------|-----------------------|-------------------------------------------------------------------------------------------------------------------------------------------------------------------------------------------------------------------------------|--------------------|-----|-------|--------------------------|
| 1    | 3.0×10 <sup>-23</sup> | <a href="#">gi 13591997 ref NP_112319.1 </a> aldehyde dehydrogenase family 6, subfamily A1 [Rattus norvegicus]                                                                                                                | <a href="#">10</a> | 8.9 | 59.59 | <input type="checkbox"/> |
| 2    | 1.2×10 <sup>-8</sup>  | <a href="#">gi 21431625 sp Q9ERB4_1 </a> [Segment 1 of 2] Versican core protein precursor (Large fibroblast proteoglycan) (Chondroitin sulfate proteoglycan core protein 2) (PG-M) (Glial hyaluronate-binding protein) (GHAP) | <a href="#">15</a> | 5.3 | 40.17 | <input type="checkbox"/> |
| 3    | 1.7×10 <sup>-8</sup>  | <a href="#">gi 40254763 ref NP_075411.2 </a> glycoprotein 50kD [Rattus norvegicus]                                                                                                                                            | <a href="#">12</a> | 6.6 | 49.94 | <input type="checkbox"/> |
| 4    | 5.3×10 <sup>-8</sup>  | <a href="#">gi 21728406 ref NP_663710.1 </a> mitochondrial Ca <sup>2+</sup> -dependent solute carrier [Rattus norvegicus]                                                                                                     | <a href="#">9</a>  | 8.9 | 54.34 | <input type="checkbox"/> |
| 5    | 5.8×10 <sup>-8</sup>  | <a href="#">gi 8394389 ref NP_058805.1 </a> synapsin 3 [Rattus norvegicus]                                                                                                                                                    | <a href="#">10</a> | 9.6 | 64.78 | <input type="checkbox"/> |
| 6    | 6.2×10 <sup>-8</sup>  | <a href="#">gi 125313 sp P09605 KCRS_RAT</a> Creatine kinase, sarcomeric mitochondrial precursor (S-MtCK) (Mib-CK) (Basic-type mitochondrial creatine kinase)                                                                 | <a href="#">12</a> | 9.2 | 48.87 | <input type="checkbox"/> |
| 7    | 6.5×10 <sup>-8</sup>  | <a href="#">gi 38541109 gb AAH62051.1 </a> Bspry protein [Rattus norvegicus]                                                                                                                                                  | <a href="#">11</a> | 5.7 | 50.85 | <input type="checkbox"/> |
| 8    | 9.1×10 <sup>-8</sup>  | <a href="#">gi 2507415 sp P45446 RORB_RAT</a> Nuclear receptor ROR-beta (Nuclear receptor RZR-beta)                                                                                                                           | <a href="#">11</a> | 8.7 | 54.30 | <input type="checkbox"/> |
| 9    | 9.2×10 <sup>-8</sup>  | <a href="#">gi 11560020 ref NP_071563.1 </a> amiloride-sensitive cation channel 5, intestinal [Rattus norvegicus]                                                                                                             | <a href="#">12</a> | 8.7 | 58.69 | <input type="checkbox"/> |
| 10   | 1.0×10 <sup>-7</sup>  | <a href="#">gi 349096 gb AAA42095.1 </a> transcription factor                                                                                                                                                                 | <a href="#">11</a> | 7.0 | 57.21 | <input type="checkbox"/> |
| 11   | 1.1×10 <sup>-7</sup>  | <a href="#">gi 11177872 ref NP_068613.1 </a> gamma-aminobutyric acid A receptor, alpha 6 [Rattus norvegicus]                                                                                                                  | <a href="#">8</a>  | 7.8 | 52.45 | <input type="checkbox"/> |
| 12   | 3.7×10 <sup>-7</sup>  | <a href="#">gi 3319077 pdb 1TOH </a> Chain , Tyrosine Hydroxylase Catalytic And Tetramerization Domains From Rat                                                                                                              | <a href="#">16</a> | 5.5 | 40.24 | <input type="checkbox"/> |
| 13   | 3.7×10 <sup>-7</sup>  | <a href="#">gi 5822500 pdb 2TOH A</a> Chain A, Tyrosine Hydroxylase Catalytic And Tetramerization Domains From Rat                                                                                                            | <a href="#">16</a> | 5.5 | 40.09 | <input type="checkbox"/> |
| 14   | 5.2×10 <sup>-7</sup>  | <a href="#">gi 13929204 ref NP_114027.1 </a> cytochrome P450, family 2, subfamily c, polypeptide 23 [Rattus norvegicus]                                                                                                       | <a href="#">10</a> | 8.7 | 58.74 | <input type="checkbox"/> |
| 15   | 9.0×10 <sup>-7</sup>  | <a href="#">gi 55778306 gb AAH86555.1 </a> Platelet-derived growth factor receptor-like [Rattus norvegicus]                                                                                                                   | <a href="#">10</a> | 9.0 | 43.46 | <input type="checkbox"/> |
| 16   | 9.4×10 <sup>-7</sup>  | <a href="#">gi 50927392 gb AAH79303.1 </a> Trmt12 protein [Rattus norvegicus]                                                                                                                                                 | <a href="#">9</a>  | 9.0 | 53.91 | <input type="checkbox"/> |
| 17   | 1.1×10 <sup>-6</sup>  | <a href="#">gi 17865343 ref NP_446025.1 </a> olfactomedin 1 [Rattus norvegicus]                                                                                                                                               | <a href="#">10</a> | 6.5 | 56.82 | <input type="checkbox"/> |
| 18   | 2.0×10 <sup>-6</sup>  | <a href="#">gi 12018278 ref NP_072128.1 </a> integrin-linked kinase-associated serine/threonine phosphatase 2C [Rattus norvegicus]                                                                                            | <a href="#">4</a>  | 6.7 | 44.47 | <input type="checkbox"/> |

|    |                      |                                                                                                                                                       |                    |     |       |                          |
|----|----------------------|-------------------------------------------------------------------------------------------------------------------------------------------------------|--------------------|-----|-------|--------------------------|
| 19 | 2.1×10 <sup>-6</sup> | <a href="#">gi 6981652 ref NP_036872.1 </a> tyrosine hydroxylase [Rattus norvegicus]                                                                  | <a href="#">11</a> | 5.7 | 57.23 | <input type="checkbox"/> |
| 20 | 2.3×10 <sup>-6</sup> | <a href="#">gi 38541341 gb AAH62010.1 </a> Integrin-linked kinase-associated serine/threonine phosphatase 2C [Rattus norvegicus]                      | <a href="#">4</a>  | 6.7 | 44.45 | <input type="checkbox"/> |
| 21 | 4.5×10 <sup>-6</sup> | <a href="#">gi 631810 pir  S43845</a> Ca <sup>2+</sup> /calmodulin-dependent protein kinase (EC 2.7.1.123) II gamma-b chain - rat                     | <a href="#">9</a>  | 7.1 | 60.90 | <input type="checkbox"/> |
| 22 | 5.9×10 <sup>-6</sup> | <a href="#">gi 11560103 ref NP_071613.1 </a> caspase 8 [Rattus norvegicus]                                                                            | <a href="#">7</a>  | 5.3 | 57.68 | <input type="checkbox"/> |
| 23 | 1.3×10 <sup>-5</sup> | <a href="#">gi 113979 sp P21396 AOFA_RAT</a> Amine oxidase [flavin-containing] A (Monoamine oxidase type A) (MAO-A)                                   | <a href="#">6</a>  | 8.5 | 61.80 | <input type="checkbox"/> |
| 24 | 1.3×10 <sup>-5</sup> | <a href="#">gi 383383 prf  1903159A</a> monoamine oxidase A                                                                                           | <a href="#">6</a>  | 8.7 | 61.05 | <input type="checkbox"/> |
| 25 | 1.3×10 <sup>-5</sup> | <a href="#">gi 48425080 pdb 1O5W A</a> Chain A, The Structure Basis Of Specific Recognitions For Substrates And Inhibitors Of Rat Monoamine Oxidase A | <a href="#">6</a>  | 8.5 | 62.82 | <input type="checkbox"/> |
| 26 | 1.3×10 <sup>-5</sup> | <a href="#">gi 220810 dbj BAA00592.1 </a> monoamine oxidase [Rattus sp.]                                                                              | <a href="#">6</a>  | 8.5 | 61.78 | <input type="checkbox"/> |
| 27 | 1.3×10 <sup>-5</sup> | <a href="#">gi 1658571 gb AAB18360.1 </a> UGT1A7 [Rattus norvegicus]                                                                                  | <a href="#">8</a>  | 9.4 | 61.52 | <input type="checkbox"/> |
| 28 | 2.6×10 <sup>-5</sup> | <a href="#">gi 13242310 ref NP_077373.1 </a> abl-interactor 1 [Rattus norvegicus]                                                                     | <a href="#">4</a>  | 6.6 | 52.64 | <input type="checkbox"/> |
| 29 | 6.0×10 <sup>-5</sup> | <a href="#">gi 56623 emb CAA35667.1 </a> unnamed protein product [Rattus norvegicus]                                                                  | <a href="#">7</a>  | 9.4 | 50.85 | <input type="checkbox"/> |
| 30 | 9.5×10 <sup>-5</sup> | <a href="#">gi 525272 emb CAA52283.1 </a> MAP2d [Rattus norvegicus]                                                                                   | <a href="#">7</a>  | 9.6 | 54.46 | <input type="checkbox"/> |
| 31 | 0.31                 | <a href="#">gi 22761814 dbj BAC11715.1 </a> centrosomal protein CG-NAP [Rattus norvegicus]                                                            | <a href="#">5</a>  | 5.0 | 54.11 | <input type="checkbox"/> |

## NOTE:

1. To search again using [unmatched masses](#), click the symbol .

**Input Summary****Search id** A4F45368-154C-550D1B55**Sequences** 20092**Date & Time** Tue Jan 30 19:06:51 2007 UTC (Search Time: 0.31 sec.)**Sample ID** 20061228 richardson NIA set 1 spot 7705, 20070130, cleaned data search 1**Database** NCBIInr [..\databases\nr]**Taxonomy** Rattus**Mass Range** 40 - 65 kDa**pI Range** 5.0 -10.0**Digestion** Trypsin**Missed Cuts** 0**Modifications** +C2H3ON@C(Complete); +CH2N2@K(Complete);**Charge State** MH+**Masses (avg)****Tolerance (avg)** 1.00 ppm

**Masses (mon)** 767.343 832.376 841.489 902.469 938.478 1013.482 1041.568 1113.602 1214.646  
1220.600 1224.583 1289.564 1329.687 1333.700 1434.723 1559.773 1602.798  
1720.868 1779.862 1808.823 1887.920 1904.849 1908.884 1911.908 2062.971  
2176.038 2183.042 2209.102 2314.154 2315.100 2367.160 2368.144 2376.167  
2377.173 2386.243 2392.184 2408.170 2419.155 2420.152 2434.272 2435.199  
2450.208 2460.159 2481.172 2482.056 2490.147 2491.153 2498.195 2499.213  
2504.176 2514.200 2529.239 2530.208 2534.193 2535.181 2546.244 2547.244  
2559.204 2560.192 2591.174 2603.204 2604.196 2609.202 2610.221 2632.211  
2633.182 2649.232 2650.204 2658.247 2659.237 2673.255 2674.188 2682.282  
2683.257 2691.242 2692.222 2700.276 2701.227 2711.300 2712.280 2719.269  
2720.279 2724.235 2725.249 2733.268 2734.259 2746.339 2762.250 2763.296  
2773.319 2775.320 2784.258 2785.278 2790.331 2791.280 2806.231 2807.286  
2817.298 2818.324 2834.305 2835.315 2840.310 2841.309 2849.289 2850.301  
2868.346 2886.408 2887.306 2893.304 2894.329 2904.312 2914.336 2922.337  
2948.343 2963.366 2964.331 2979.346 2980.358 2996.333 2997.327 3000.505  
3001.430 3012.323 3020.353 3029.340 3047.466 3052.322 3053.336 3060.405  
3061.399 3068.359 3069.340 3077.385 3084.359 3085.396 3092.399 3102.394  
3103.415 3111.381 3112.359 3135.414 3147.517 3154.445 3172.471 3173.427  
3182.458 3183.430 3187.461 3198.456 3208.463 3218.459 3228.476 3244.485  
3245.523 3262.491 3275.438 3276.449 3281.526 3292.476 3306.510 3307.515  
3314.500 3330.572 3331.604 3347.567 3353.558 3354.525 3372.586 3373.508  
3392.545 3393.539 3402.526 3402.548 3403.551 3407.573 3408.597 3418.564  
3419.523 3432.558 3447.593 3466.575 3476.583 3478.611 3479.577 3489.512  
3490.497 3493.545 3494.535 3509.597 3518.534 3526.686 3543.638 3551.571  
3568.641 3583.649 3599.645 3614.595 3623.676 3634.630 3651.619 3665.625  
3667.802 3679.656 3694.693 3699.656 3710.666 3726.614 3742.620 3756.721  
3774.733 3781.667 3794.741 3798.675 3813.666 3820.751 3831.685 3839.750  
3848.664 3875.744 3891.779 4085.803 4094.891 4115.886 4219.917

**Tolerance (mon)** 10.00 ppm

**Number of Peptides** 224

# Laboratory of Mass Spectrometry and Gaseous Ion Chemistry

## PROWL

- ▶ **ProFound**
- ▶ **ProteinInfo**
- ▶ **PeptideMap**
- ▶ **PepFrag**
- ▶ **X! Tandem**
- ▶ **X! Hunter**
- ▶ **GPMDDB**
- ▶ **PROWL Home**
- ▶ **Chait Lab**



The Rockefeller University  
1230 York Avenue,  
New York, NY 10021  
(212) 327-8000



**National Center for  
Research Resources**

National Resource  
for the Mass Spectrometric  
Analysis of Biological  
Macromolecules

## ProFound



### Protein Candidates

| Rank | Expectation          | Protein Information and Sequence Analyse Tools (T)                                                                              | %  | pI  | kDa   | R |
|------|----------------------|---------------------------------------------------------------------------------------------------------------------------------|----|-----|-------|---|
| 1    | 1.1×10 <sup>-8</sup> | gi 53850648 ref NP_001005560.1  phospholipase A2, group VI [Rattus norvegicus]                                                  | 49 | 6.7 | 92.16 | ⊙ |
| 2    | 2.9×10 <sup>-6</sup> | gi 17105334 ref NP_476533.1  folate hydrolase [Rattus norvegicus]                                                               | 47 | 7.1 | 86.73 | ⊙ |
| 3    | 3.0×10 <sup>-6</sup> | gi 2190301 dbj BAA20333.1  protein tyrosine phosphatase epsilon C [Rattus norvegicus]                                           | 52 | 7.2 | 78.91 | ⊙ |
| 4    | 6.9×10 <sup>-6</sup> | gi 50511338 ref NP_001002289.1  fucosyltransferase 8 (alpha (1,6) fucosyltransferase) [Rattus norvegicus]                       | 41 | 7.2 | 68.52 | ⊙ |
| 5    | 3.8×10 <sup>-5</sup> | gi 34871240 ref XP_343881.1  PREDICTED: similar to IL2-inducible T-cell kinase [Rattus norvegicus]                              | 51 | 7.3 | 74.62 | ⊙ |
| +6   | 1.3×10 <sup>-4</sup> | gi 47575877 ref NP_757376.2  complement component 2 [Rattus norvegicus]                                                         | 47 | 7.1 | 86.30 | ⊙ |
| -    | -                    | gi 25244377 gb AAN72414.1  complement component C2 [Rattus norvegicus]                                                          | 47 | 7.1 | 86.41 | ⊙ |
| -    | -                    | gi 47605759 sp Q8R500 MFN2_RAT Mitofusin-2 (Transmembrane GTPase MFN2) (Mitochondrial transmembrane GTPase FZO1A) (Protein HSG) | 41 | 6.5 | 88.61 | ⊙ |
| -    | -                    | gi 18426848 ref NP_569104.1  tripartite motif-containing 9 [Rattus norvegicus]                                                  | 37 | 6.6 | 82.40 | ⊙ |
| -    | -                    | gi 40786501 ref NP_955434.1  sperm protein SSP411 [Rattus norvegicus]                                                           | 35 | 6.6 | 90.63 | ⊙ |
| -    | -                    | gi 56090285 ref NP_001007625.1  glutaminyl-tRNA synthetase [Rattus norvegicus]                                                  | 41 | 7.0 | 90.53 | ⊙ |
| -    | -                    | gi 48256734 gb AAT41589.1  acyl-CoA synthetase isoform 6 variant2 [Rattus norvegicus]                                           | 41 | 6.8 | 81.07 | ⊙ |

|   |                                                                                                                                                                   |    |     |       |   |
|---|-------------------------------------------------------------------------------------------------------------------------------------------------------------------|----|-----|-------|---|
| - | gi 6980988 ref NP_036708.1  glucocorticoid receptor [Rattus norvegicus]                                                                                           | 36 | 6.6 | 90.77 | ⊖ |
| - | gi 47059181 ref NP_997631.1  B-factor, properdin [Rattus norvegicus]                                                                                              | 24 | 6.6 | 88.83 | ⊖ |
| - | gi 30060330 gb AAO89095.1  ARNT2 exon 19 insertion variant; aryl hydrocarbon receptor nuclear translocator 2 splice variant; bHLH/PAS protein [Rattus norvegicus] | 48 | 7.0 | 77.12 | ⊖ |
| - | gi 13928932 ref NP_113861.1  calpain 10 [Rattus norvegicus]                                                                                                       | 35 | 7.0 | 76.79 | ⊖ |
| - | gi 32469278 dbj BAC79049.1  calpain10 [Rattus norvegicus]                                                                                                         | 35 | 7.0 | 76.81 | ⊖ |
| - | gi 40645510 dbj BAD06361.1  calpain10 [Rattus norvegicus]                                                                                                         | 35 | 7.0 | 76.84 | ⊖ |
| - | gi 417242 sp P33124 ACSL6_RAT Long-chain-fatty-acid--CoA ligase 6 (Long-chain acyl-CoA synthetase 6) (LACS 6) (Long-chain-fatty-acid--CoA ligase, brain isozyme)  | 37 | 6.7 | 81.04 | ⊖ |
| - | gi 18543341 ref NP_570095.1  acyl-CoA synthetase long-chain family member 6 [Rattus norvegicus]                                                                   | 37 | 6.6 | 81.02 | ⊖ |
| - | gi 49359177 gb AAT65503.1  protein kinase C epsilon [Rattus norvegicus]                                                                                           | 37 | 6.6 | 87.28 | ⊖ |
| - | gi 31088216 dbj BAC76890.1  nuclear protein UKp83 [Rattus norvegicus]                                                                                             | 40 | 6.6 | 85.77 | ⊖ |
| - | gi 6981002 ref NP_037221.1  glycogen synthase 2 [Rattus norvegicus]                                                                                               | 40 | 6.5 | 82.81 | ⊖ |
| - | gi 50927110 gb AAH79435.1  Zinc finger proliferation 1 [Rattus norvegicus]                                                                                        | 34 | 7.4 | 66.01 | ⊖ |
| - | gi 23305781 gb AAN17280.1  testicular angiotensin-1 converting enzyme [Rattus norvegicus]                                                                         | 41 | 6.6 | 90.42 | ⊖ |
| - | gi 27704760 ref XP_230845.1  PREDICTED: similar to zinc finger, SWIM domain containing 3 [Rattus norvegicus]                                                      | 31 | 6.8 | 82.64 | ⊖ |
| - | gi 13928736 ref NP_113732.1  adenosine monophosphate deaminase 3 [Rattus norvegicus]                                                                              | 36 | 6.9 | 94.98 | ⊖ |

## NOTE:

1. To search again using **unmatched masses**, click the symbol ⊖.
2. Highly similar protein sequences were given the same rank (click "+" to expand/contract).

**Input Summary****Search id** B17C136D-08C0-B24488C2**Sequences** 20076**Date & Time** Sat Feb 03 01:22:26 2007 UTC (Search Time: 0.52 sec.)**Sample ID****Database** NCBI nr [..\databases\nr]**Taxonomy** Rattus**Mass Range** 66 - 95 kDa**pI Range** 6.5 -7.7**Digestion** Trypsin**Missed Cuts** 1**Modifications** +C2H3ON@C(Complete); +O@M(Partial); +HPO3@STY  
(Partial); +CH2N2@K(Complete);**Charge State** MH+**Masses (avg)****Tolerance (avg)** 1.00 ppm

**Masses (mon)** 841.481 848.443 902.470 1030.511 1046.496 1064.507  
1194.589 1211.585 1247.607 1268.605 1280.623 1330.603  
1695.791 1752.840 1780.859 1891.875 1895.882 1905.881  
1932.904 1953.928 1962.904 1965.911 1982.925 1987.916  
2001.935 2002.922 2004.922 2005.917 2017.924 2018.935  
2023.949 2035.958 2036.952 2039.964 2052.945 2053.961  
2070.971 2096.981 2114.996 2115.981 2121.993 2136.012  
2137.012 2152.043 2183.078 2225.114 2241.122 2242.146  
2298.146 2305.115 2348.133 2349.140 2366.155 2367.111  
2375.147 2376.142 2382.140 2383.140 2390.152 2415.128  
2416.146 2422.178 2433.152 2450.179 2460.166 2465.186  
2466.198 2479.200 2497.189 2506.188 2507.203 2514.188  
2533.173 2534.179 2549.197 2550.179 2556.174 2557.182  
2561.213 2562.208 2591.180 2603.221 2604.205 2637.217  
2638.224 2649.232 2650.219 2669.231 2670.218 2678.237  
2680.241 2687.237 2688.234 2701.237 2702.225 2708.278  
2718.258 2719.254 2731.242 2732.251 2744.256 2745.256  
2749.278 2750.262 2763.246 2764.273 2776.266 2777.295  
2787.270 2788.274 2800.283 2801.278 2807.265 2815.288



|          |          |          |          |          |          |
|----------|----------|----------|----------|----------|----------|
| 2816.282 | 2820.287 | 2832.301 | 2833.300 | 2837.308 | 2838.311 |
| 2848.291 | 2850.305 | 2868.332 | 2890.309 | 2891.298 | 2897.340 |
| 2898.290 | 2906.348 | 2922.340 | 2944.344 | 2946.336 | 2949.352 |
| 2978.378 | 2995.389 | 2996.402 | 3001.389 | 3002.394 | 3010.365 |
| 3011.384 | 3020.365 | 3021.367 | 3029.456 | 3047.437 | 3063.433 |
| 3064.407 | 3075.396 | 3076.428 | 3094.488 | 3136.424 | 3147.467 |
| 3148.474 | 3187.431 | 3196.449 | 3211.471 | 3212.476 | 3220.477 |
| 3228.469 | 3244.477 | 3245.497 | 3262.519 | 3274.465 | 3275.488 |
| 3283.494 | 3292.542 | 3314.513 | 3328.545 | 3335.528 | 3336.528 |
| 3342.511 | 3356.536 | 3357.513 | 3368.571 | 3382.511 | 3383.522 |
| 3390.547 | 3391.498 | 3400.561 | 3408.531 | 3409.536 | 3419.552 |
| 3420.560 | 3430.562 | 3431.534 | 3441.567 | 3442.557 | 3448.582 |
| 3465.623 | 3466.566 | 3483.532 | 3484.601 | 3491.588 | 3492.536 |
| 3499.575 | 3507.594 | 3519.595 | 3529.607 | 3545.602 | 3559.601 |
| 3567.636 | 3580.593 | 3585.638 | 3590.650 | 3594.610 | 3601.594 |
| 3613.692 | 3630.604 | 3642.609 | 3652.630 | 3653.622 | 3661.654 |
| 3667.656 | 3678.661 | 3686.686 | 3694.654 | 3705.706 | 3725.687 |
| 3738.687 | 3742.680 | 3748.661 | 3759.658 | 3768.717 | 3780.724 |
| 3787.695 | 3803.715 | 3811.726 | 3825.730 | 3834.687 | 3841.741 |
| 3859.745 | 3865.785 | 3872.769 | 3886.754 | 3891.787 | 3901.783 |
| 3907.727 | 3911.752 | 3924.774 | 3939.792 | 3949.776 | 3958.803 |
| 3978.790 | 3986.851 | 3995.830 | 4005.752 | 4021.819 | 4038.810 |
| 4050.825 | 4067.768 | 4083.945 | 4097.872 | 4107.815 | 4120.921 |
| 4127.885 | 4140.089 | 4152.874 | 4165.914 | 4182.806 | 4193.913 |
| 4212.977 | 4227.163 | 4500.614 | 4519.819 |          |          |

**Tolerance** 39.00 ppm  
**(mon)**

**Number of** 262  
**Peptides**
