# Supplementary material
Source: PubMed Central journal article supplement (PMC3255083)
Supplement: NIHMS77189-supplement-03.pdf [file NIHMS77189-supplement-03.pdf]

**Sigma Stat statistical analysis results corresponding to Table 1 of Richardson *et al.***

**One Way Analysis of Variance**

**Data source:** SSP#0116

**Normality Test:** Passed (P > 0.050)

**Equal Variance Test:** Passed (P = 0.119)

| <b>Group Name</b> | <b>N</b> | <b>Missing</b> | <b>Mean</b> | <b>Std Dev</b> | <b>SEM</b> |
|-------------------|----------|----------------|-------------|----------------|------------|
| 4mon              | 4        | 0              | 231.803     | 97.856         | 48.928     |
| 12mon             | 5        | 0              | 88.406      | 100.953        | 45.147     |
| 24mon             | 5        | 0              | 389.724     | 89.060         | 39.829     |
| 34mon             | 4        | 0              | 720.135     | 242.479        | 121.239    |

| <b>Source of Variation</b> | <b>DF</b> | <b>SS</b>   | <b>MS</b>  | <b>F</b> | <b>P</b> |
|----------------------------|-----------|-------------|------------|----------|----------|
| Between Groups             | 3         | 953355.878  | 317785.293 | 16.026   | <0.001   |
| Residual                   | 14        | 277607.486  | 19829.106  |          |          |
| Total                      | 17        | 1230963.364 |            |          |          |

The differences in the mean values among the treatment groups are greater than would be expected by chance; there is a statistically significant difference (P = <0.001).

Power of performed test with alpha = 0.050: 1.000

All Pairwise Multiple Comparison Procedures (Holm-Sidak method):  
Overall significance level = 0.05

Comparisons for factor:

| <b>Comparison</b> | <b>Diff of Means</b> | <b>t</b> | <b>Unadjusted P</b> | <b>Critical Level</b> | <b>Significant?</b> |
|-------------------|----------------------|----------|---------------------|-----------------------|---------------------|
| 34mon vs. 12mon   | 631.729              | 6.688    | <0.001              | 0.009                 | Yes                 |
| 34mon vs. 4mon    | 488.332              | 4.904    | <0.001              | 0.010                 | Yes                 |
| 34mon vs. 24mon   | 330.411              | 3.498    | 0.004               | 0.013                 | Yes                 |
| 24mon vs. 12mon   | 301.318              | 3.383    | 0.004               | 0.017                 | Yes                 |
| 24mon vs. 4mon    | 157.922              | 1.672    | 0.117               | 0.025                 | No                  |
| 4mon vs. 12mon    | 143.397              | 1.518    | 0.151               | 0.050                 | No                  |

## One Way Analysis of Variance

Data source: SSP#1003

Normality Test: Passed (P > 0.050)

Equal Variance Test: Passed (P = 0.695)

| Group Name | N | Missing | Mean     | Std Dev | SEM     |
|------------|---|---------|----------|---------|---------|
| 4mon       | 4 | 0       | 1519.495 | 747.504 | 373.752 |
| 12mon      | 5 | 0       | 1946.490 | 383.173 | 171.360 |
| 24mon      | 5 | 0       | 3866.934 | 713.315 | 319.004 |
| 34mon      | 4 | 0       | 4011.618 | 331.216 | 165.608 |

| Source of Variation | DF | SS           | MS          | F      | P      |
|---------------------|----|--------------|-------------|--------|--------|
| Between Groups      | 3  | 21730167.317 | 7243389.106 | 21.912 | <0.001 |
| Residual            | 14 | 4627959.569  | 330568.541  |        |        |
| Total               | 17 | 26358126.886 |             |        |        |

The differences in the mean values among the treatment groups are greater than would be expected by chance; there is a statistically significant difference (P = <0.001).

Power of performed test with alpha = 0.050: 1.000

All Pairwise Multiple Comparison Procedures (Holm-Sidak method):

Overall significance level = 0.05

Comparisons for factor:

| Comparison      | Diff of Means | t     | Unadjusted P | Critical Level | Significant? |
|-----------------|---------------|-------|--------------|----------------|--------------|
| 34mon vs. 4mon  | 2492.123      | 6.130 | <0.001       | 0.009          | Yes          |
| 24mon vs. 4mon  | 2347.439      | 6.086 | <0.001       | 0.010          | Yes          |
| 34mon vs. 12mon | 2065.128      | 5.354 | <0.001       | 0.013          | Yes          |
| 24mon vs. 12mon | 1920.444      | 5.281 | <0.001       | 0.017          | Yes          |
| 12mon vs. 4mon  | 426.995       | 1.107 | 0.287        | 0.025          | No           |
| 34mon vs. 24mon | 144.684       | 0.375 | 0.713        | 0.050          | No           |

## One Way Analysis of Variance

Data source: SSP#1006

Normality Test: Passed (P > 0.050)

Equal Variance Test: Failed (P = 0.004)

| Group Name | N | Missing | Mean     | Std Dev | SEM     |
|------------|---|---------|----------|---------|---------|
| 4mon       | 4 | 0       | 237.865  | 76.295  | 38.148  |
| 12mon      | 5 | 0       | 354.026  | 240.910 | 107.738 |
| 24mon      | 5 | 0       | 1076.666 | 513.245 | 229.530 |
| 34mon      | 4 | 0       | 865.060  | 259.966 | 129.983 |

| Source of Variation | DF | SS          | MS         | F     | P     |
|---------------------|----|-------------|------------|-------|-------|
| Between Groups      | 3  | 2211636.567 | 737212.189 | 6.853 | 0.005 |
| Residual            | 14 | 1506043.670 | 107574.548 |       |       |
| Total               | 17 | 3717680.237 |            |       |       |

The differences in the mean values among the treatment groups are greater than would be expected by chance; there is a statistically significant difference (P = 0.005).

Power of performed test with alpha = 0.050: 0.882

All Pairwise Multiple Comparison Procedures (Holm-Sidak method):

Overall significance level = 0.05

Comparisons for factor:

| Comparison      | Diff of Means | t     | Unadjusted P | Critical Level | Significant? |
|-----------------|---------------|-------|--------------|----------------|--------------|
| 24mon vs. 4mon  | 838.801       | 3.812 | 0.002        | 0.009          | Yes          |
| 24mon vs. 12mon | 722.640       | 3.484 | 0.004        | 0.010          | Yes          |
| 34mon vs. 4mon  | 627.195       | 2.704 | 0.017        | 0.013          | Yes          |
| 34mon vs. 12mon | 511.034       | 2.323 | 0.036        | 0.017          | Yes          |
| 24mon vs. 34mon | 211.606       | 0.962 | 0.352        | 0.025          | No           |
| 12mon vs. 4mon  | 116.161       | 0.528 | 0.606        | 0.050          | No           |

## One Way Analysis of Variance

Data source: SSP#1111

Normality Test: Passed (P > 0.050)

Equal Variance Test: Failed (P = 0.015)

| Group Name | N | Missing | Mean    | Std Dev | SEM    |
|------------|---|---------|---------|---------|--------|
| 4mon       | 4 | 0       | 0.000   | 0.000   | 0.000  |
| 12mon      | 5 | 0       | 50.996  | 52.757  | 23.593 |
| 24mon      | 5 | 0       | 152.870 | 82.215  | 36.768 |
| 34mon      | 4 | 0       | 435.833 | 55.243  | 27.621 |

| Source of Variation | DF | SS         | MS         | F      | P      |
|---------------------|----|------------|------------|--------|--------|
| Between Groups      | 3  | 465632.890 | 155210.963 | 45.915 | <0.001 |
| Residual            | 14 | 47325.774  | 3380.412   |        |        |
| Total               | 17 | 512958.665 |            |        |        |

The differences in the mean values among the treatment groups are greater than would be expected by chance; there is a statistically significant difference (P = <0.001).

Power of performed test with alpha = 0.050: 1.000

All Pairwise Multiple Comparison Procedures (Holm-Sidak method):

Overall significance level = 0.05

Comparisons for factor:

| Comparison      | Diff of Means | t      | Unadjusted P | Critical Level | Significant? |
|-----------------|---------------|--------|--------------|----------------|--------------|
| 34mon vs. 4mon  | 435.833       | 10.601 | <0.001       | 0.009          | Yes          |
| 34mon vs. 12mon | 384.837       | 9.867  | <0.001       | 0.010          | Yes          |
| 34mon vs. 24mon | 282.963       | 7.255  | <0.001       | 0.013          | Yes          |
| 24mon vs. 4mon  | 152.870       | 3.920  | 0.002        | 0.017          | Yes          |
| 24mon vs. 12mon | 101.874       | 2.770  | 0.015        | 0.025          | Yes          |
| 12mon vs. 4mon  | 50.996        | 1.308  | 0.212        | 0.050          | No           |

## One Way Analysis of Variance

Data source: SSP#1112

Normality Test: Passed (P > 0.050)

Equal Variance Test: Passed (P = 0.701)

| Group Name | N | Missing | Mean     | Std Dev | SEM     |
|------------|---|---------|----------|---------|---------|
| 4m         | 4 | 0       | 743.330  | 102.118 | 51.059  |
| 12m        | 5 | 0       | 745.054  | 111.576 | 49.898  |
| 24m        | 5 | 0       | 1049.760 | 271.039 | 121.212 |
| 34m        | 4 | 0       | 1147.063 | 110.658 | 55.329  |

| Source of Variation | DF | SS         | MS         | F     | P     |
|---------------------|----|------------|------------|-------|-------|
| Between Groups      | 3  | 568264.507 | 189421.502 | 6.442 | 0.006 |
| Residual            | 14 | 411665.507 | 29404.679  |       |       |
| Total               | 17 | 979930.014 |            |       |       |

The differences in the mean values among the treatment groups are greater than would be expected by chance; there is a statistically significant difference (P = 0.006).

Power of performed test with alpha = 0.050: 0.855

All Pairwise Multiple Comparison Procedures (Holm-Sidak method):

Overall significance level = 0.05

Comparisons for factor:

| Comparison  | Diff of Means | t      | Unadjusted P | Critical Level | Significant? |
|-------------|---------------|--------|--------------|----------------|--------------|
| 34m vs. 12m | 402.009       | 3.495  | 0.004        | 0.009          | Yes          |
| 34m vs. 4m  | 403.733       | 3.330  | 0.005        | 0.010          | Yes          |
| 24m vs. 12m | 304.706       | 2.810  | 0.014        | 0.013          | Yes          |
| 24m vs. 4m  | 306.430       | 2.664  | 0.019        | 0.017          | Yes          |
| 34m vs. 24m | 97.303        | 0.846  | 0.412        | 0.025          | No           |
| 12m vs. 4m  | 1.724         | 0.0150 | 0.988        | 0.050          | No           |

## One Way Analysis of Variance

Data source: SSP#1209

Normality Test: Passed (P > 0.050)

Equal Variance Test: Passed (P = 0.730)

| Group Name | N | Missing | Mean    | Std Dev | SEM     |
|------------|---|---------|---------|---------|---------|
| 4mon       | 4 | 0       | 223.520 | 57.861  | 28.931  |
| 12mon      | 5 | 0       | 206.340 | 67.443  | 30.162  |
| 24mon      | 5 | 0       | 468.160 | 81.320  | 36.367  |
| 34mon      | 4 | 0       | 662.278 | 226.037 | 113.018 |

| Source of Variation | DF | SS         | MS         | F      | P      |
|---------------------|----|------------|------------|--------|--------|
| Between Groups      | 3  | 605997.939 | 201999.313 | 13.598 | <0.001 |
| Residual            | 14 | 207967.434 | 14854.817  |        |        |
| Total               | 17 | 813965.373 |            |        |        |

The differences in the mean values among the treatment groups are greater than would be expected by chance; there is a statistically significant difference (P = <0.001).

Power of performed test with alpha = 0.050: 0.998

All Pairwise Multiple Comparison Procedures (Holm-Sidak method):

Overall significance level = 0.05

Comparisons for factor:

| Comparison      | Diff of Means | t     | Unadjusted P | Critical Level | Significant? |
|-----------------|---------------|-------|--------------|----------------|--------------|
| 34mon vs. 12mon | 455.938       | 5.577 | <0.001       | 0.009          | Yes          |
| 34mon vs. 4mon  | 438.758       | 5.091 | <0.001       | 0.010          | Yes          |
| 24mon vs. 12mon | 261.820       | 3.397 | 0.004        | 0.013          | Yes          |
| 24mon vs. 4mon  | 244.640       | 2.992 | 0.010        | 0.017          | Yes          |
| 34mon vs. 24mon | 194.118       | 2.374 | 0.032        | 0.025          | Yes          |
| 4mon vs. 12mon  | 17.180        | 0.210 | 0.837        | 0.050          | No           |

## One Way Analysis of Variance

Data source: SSP#1211

Normality Test: Passed (P > 0.050)

Equal Variance Test: Passed (P = 0.447)

| Group Name | N | Missing | Mean    | Std Dev | SEM    |
|------------|---|---------|---------|---------|--------|
| 4mon       | 4 | 0       | 103.035 | 87.318  | 43.659 |
| 12mon      | 5 | 0       | 162.072 | 111.432 | 49.834 |
| 24mon      | 5 | 0       | 352.686 | 165.872 | 74.180 |
| 34mon      | 4 | 0       | 509.765 | 107.982 | 53.991 |

| Source of Variation | DF | SS         | MS         | F     | P     |
|---------------------|----|------------|------------|-------|-------|
| Between Groups      | 3  | 432373.088 | 144124.363 | 9.274 | 0.001 |
| Residual            | 14 | 217575.943 | 15541.139  |       |       |
| Total               | 17 | 649949.031 |            |       |       |

The differences in the mean values among the treatment groups are greater than would be expected by chance; there is a statistically significant difference (P = 0.001).

Power of performed test with alpha = 0.050: 0.969

All Pairwise Multiple Comparison Procedures (Holm-Sidak method):

Overall significance level = 0.05

Comparisons for factor:

| Comparison      | Diff of Means | t     | Unadjusted P | Critical Level | Significant? |
|-----------------|---------------|-------|--------------|----------------|--------------|
| 34mon vs. 4mon  | 406.730       | 4.614 | <0.001       | 0.009          | Yes          |
| 34mon vs. 12mon | 347.693       | 4.158 | <0.001       | 0.010          | Yes          |
| 24mon vs. 4mon  | 249.651       | 2.985 | 0.010        | 0.013          | Yes          |
| 24mon vs. 12mon | 190.614       | 2.418 | 0.030        | 0.017          | Yes          |
| 34mon vs. 24mon | 157.079       | 1.878 | 0.081        | 0.025          | No           |
| 12mon vs. 4mon  | 59.037        | 0.706 | 0.492        | 0.050          | No           |

## One Way Analysis of Variance

Data source: SSP#1305

Normality Test: Passed (P > 0.050)

Equal Variance Test: Passed (P = 0.099)

| Group Name | N | Missing | Mean    | Std Dev | SEM    |
|------------|---|---------|---------|---------|--------|
| 4mon       | 4 | 0       | 54.787  | 31.595  | 15.797 |
| 12mon      | 5 | 0       | 102.712 | 73.687  | 32.954 |
| 24mon      | 5 | 0       | 328.262 | 134.025 | 59.938 |
| 34mon      | 4 | 0       | 408.195 | 134.130 | 67.065 |

| Source of Variation | DF | SS         | MS         | F      | P      |
|---------------------|----|------------|------------|--------|--------|
| Between Groups      | 3  | 378114.111 | 126038.037 | 11.722 | <0.001 |
| Residual            | 14 | 150537.321 | 10752.666  |        |        |
| Total               | 17 | 528651.432 |            |        |        |

The differences in the mean values among the treatment groups are greater than would be expected by chance; there is a statistically significant difference (P = <0.001).

Power of performed test with alpha = 0.050: 0.993

All Pairwise Multiple Comparison Procedures (Holm-Sidak method):  
Overall significance level = 0.05

Comparisons for factor:

| Comparison      | Diff of Means | t     | Unadjusted P | Critical Level | Significant? |
|-----------------|---------------|-------|--------------|----------------|--------------|
| 34mon vs. 4mon  | 353.408       | 4.820 | <0.001       | 0.009          | Yes          |
| 34mon vs. 12mon | 305.483       | 4.392 | <0.001       | 0.010          | Yes          |
| 24mon vs. 4mon  | 273.475       | 3.931 | 0.002        | 0.013          | Yes          |
| 24mon vs. 12mon | 225.550       | 3.439 | 0.004        | 0.017          | Yes          |
| 34mon vs. 24mon | 79.933        | 1.149 | 0.270        | 0.025          | No           |
| 12mon vs. 4mon  | 47.925        | 0.689 | 0.502        | 0.050          | No           |



## One Way Analysis of Variance

Data source: SSP#1617

Normality Test: Passed (P > 0.050)

Equal Variance Test: Passed (P = 0.820)

| Group Name | N | Missing | Mean     | Std Dev | SEM     |
|------------|---|---------|----------|---------|---------|
| 4mon       | 4 | 0       | 284.337  | 249.390 | 124.695 |
| 12mon      | 5 | 0       | 1098.282 | 392.390 | 175.482 |
| 24mon      | 5 | 0       | 513.806  | 306.034 | 136.862 |
| 34mon      | 4 | 0       | 1657.408 | 489.683 | 244.842 |

| Source of Variation | DF | SS          | MS          | F      | P      |
|---------------------|----|-------------|-------------|--------|--------|
| Between Groups      | 3  | 4745421.534 | 1581807.178 | 11.677 | <0.001 |
| Residual            | 14 | 1896461.919 | 135461.566  |        |        |
| Total               | 17 | 6641883.452 |             |        |        |

The differences in the mean values among the treatment groups are greater than would be expected by chance; there is a statistically significant difference (P = <0.001).

Power of performed test with alpha = 0.050: 0.993

All Pairwise Multiple Comparison Procedures (Holm-Sidak method):

Overall significance level = 0.05

Comparisons for factor:

| Comparison      | Diff of Means | t     | Unadjusted P | Critical Level | Significant? |
|-----------------|---------------|-------|--------------|----------------|--------------|
| 34mon vs. 4mon  | 1373.070      | 5.276 | <0.001       | 0.009          | Yes          |
| 34mon vs. 24mon | 1143.602      | 4.632 | <0.001       | 0.010          | Yes          |
| 12mon vs. 4mon  | 813.944       | 3.297 | 0.005        | 0.013          | Yes          |
| 12mon vs. 24mon | 584.476       | 2.511 | 0.025        | 0.017          | Yes          |
| 34mon vs. 12mon | 559.126       | 2.265 | 0.040        | 0.025          | Yes          |
| 24mon vs. 4mon  | 229.468       | 0.929 | 0.368        | 0.050          | No           |

## One Way Analysis of Variance

Data source: SSP#2002

Normality Test: Failed (P = 0.014)

Equal Variance Test: Passed (P = 0.746)

| Group Name | N | Missing | Mean     | Std Dev  | SEM     |
|------------|---|---------|----------|----------|---------|
| 4mon       | 4 | 0       | 257.420  | 514.840  | 257.420 |
| 12mon      | 5 | 0       | 1163.390 | 470.106  | 210.238 |
| 24mon      | 5 | 0       | 2516.574 | 1056.562 | 472.509 |
| 34mon      | 4 | 0       | 2635.010 | 1738.552 | 869.276 |

| Source of Variation | DF | SS           | MS          | F     | P     |
|---------------------|----|--------------|-------------|-------|-------|
| Between Groups      | 3  | 16572757.762 | 5524252.587 | 5.084 | 0.014 |
| Residual            | 14 | 15212156.225 | 1086582.588 |       |       |
| Total               | 17 | 31784913.987 |             |       |       |

The differences in the mean values among the treatment groups are greater than would be expected by chance; there is a statistically significant difference (P = 0.014).

Power of performed test with alpha = 0.050: 0.727

The power of the performed test (0.727) is below the desired power of 0.800. You should interpret the negative findings cautiously.

All Pairwise Multiple Comparison Procedures (Holm-Sidak method):  
Overall significance level = 0.05

Comparisons for factor:

| Comparison      | Diff of Means | t     | Unadjusted P | Critical Level | Significant? |
|-----------------|---------------|-------|--------------|----------------|--------------|
| 24mon vs. 4mon  | 2259.154      | 3.231 | 0.006        | 0.009          | Yes          |
| 34mon vs. 4mon  | 2377.590      | 3.226 | 0.006        | 0.010          | Yes          |
| 34mon vs. 12mon | 1471.620      | 2.105 | 0.054        | 0.013          | No           |
| 24mon vs. 12mon | 1353.184      | 2.053 | 0.059        | 0.017          | No           |
| 12mon vs. 4mon  | 905.970       | 1.296 | 0.216        | 0.025          | No           |
| 34mon vs. 24mon | 118.436       | 0.169 | 0.868        | 0.050          | No           |

## One Way Analysis of Variance

Data source: SSP#2003

Normality Test: Passed (P > 0.050)

Equal Variance Test: Passed (P = 0.270)

| Group Name | N | Missing | Mean     | Std Dev  | SEM     |
|------------|---|---------|----------|----------|---------|
| 4m         | 4 | 0       | 737.152  | 272.243  | 136.121 |
| 12m        | 5 | 0       | 1827.718 | 706.305  | 315.869 |
| 24m        | 5 | 0       | 1969.064 | 1449.776 | 648.360 |
| 34m        | 4 | 0       | 3494.523 | 1347.438 | 673.719 |

| Source of Variation | DF | SS           | MS          | F     | P     |
|---------------------|----|--------------|-------------|-------|-------|
| Between Groups      | 3  | 15466271.942 | 5155423.981 | 4.491 | 0.021 |
| Residual            | 14 | 16071984.158 | 1147998.868 |       |       |
| Total               | 17 | 31538256.100 |             |       |       |

The differences in the mean values among the treatment groups are greater than would be expected by chance; there is a statistically significant difference (P = 0.021).

Power of performed test with alpha = 0.050: 0.649

The power of the performed test (0.649) is below the desired power of 0.800. You should interpret the negative findings cautiously.

All Pairwise Multiple Comparison Procedures (Holm-Sidak method):  
Overall significance level = 0.05

Comparisons for factor:

| Comparison  | Diff of Means | t     | Unadjusted P | Critical Level | Significant? |
|-------------|---------------|-------|--------------|----------------|--------------|
| 34m vs. 4m  | 2757.370      | 3.639 | 0.003        | 0.009          | Yes          |
| 34m vs. 12m | 1666.805      | 2.319 | 0.036        | 0.010          | Yes          |
| 34m vs. 24m | 1525.459      | 2.122 | 0.052        | 0.013          | No           |
| 24m vs. 4m  | 1231.911      | 1.714 | 0.109        | 0.017          | No           |
| 12m vs. 4m  | 1090.566      | 1.517 | 0.151        | 0.025          | No           |
| 24m vs. 12m | 141.346       | 0.209 | 0.838        | 0.050          | No           |

## One Way Analysis of Variance

Data source: SSP#2102

Normality Test: Passed (P > 0.050)

Equal Variance Test: Passed (P = 0.376)

| Group Name | N | Missing | Mean     | Std Dev | SEM     |
|------------|---|---------|----------|---------|---------|
| 4mon       | 4 | 0       | 1146.815 | 575.871 | 287.936 |
| 12mon      | 5 | 0       | 1031.846 | 162.930 | 72.865  |
| 24mon      | 5 | 0       | 1897.614 | 438.675 | 196.182 |
| 34mon      | 4 | 0       | 2262.412 | 253.124 | 126.562 |

| Source of Variation | DF | SS          | MS          | F      | P      |
|---------------------|----|-------------|-------------|--------|--------|
| Between Groups      | 3  | 4618753.199 | 1539584.400 | 10.448 | <0.001 |
| Residual            | 14 | 2063029.313 | 147359.237  |        |        |
| Total               | 17 | 6681782.512 |             |        |        |

The differences in the mean values among the treatment groups are greater than would be expected by chance; there is a statistically significant difference (P = <0.001).

Power of performed test with alpha = 0.050: 0.985

All Pairwise Multiple Comparison Procedures (Holm-Sidak method):  
Overall significance level = 0.05

Comparisons for factor:

| Comparison      | Diff of Means | t     | Unadjusted P | Critical Level | Significant? |
|-----------------|---------------|-------|--------------|----------------|--------------|
| 34mon vs. 12mon | 1230.566      | 4.779 | <0.001       | 0.009          | Yes          |
| 34mon vs. 4mon  | 1115.597      | 4.110 | 0.001        | 0.010          | Yes          |
| 24mon vs. 12mon | 865.768       | 3.566 | 0.003        | 0.013          | Yes          |
| 24mon vs. 4mon  | 750.799       | 2.916 | 0.011        | 0.017          | Yes          |
| 34mon vs. 24mon | 364.798       | 1.417 | 0.178        | 0.025          | No           |
| 4mon vs. 12mon  | 114.969       | 0.446 | 0.662        | 0.050          | No           |

## One Way Analysis of Variance

Data source: SSP#2112

Normality Test: Passed (P > 0.050)

Equal Variance Test: Passed (P = 0.505)

| Group Name | N | Missing | Mean    | Std Dev | SEM    |
|------------|---|---------|---------|---------|--------|
| 4mon       | 4 | 0       | 276.543 | 93.210  | 46.605 |
| 12mon      | 5 | 0       | 125.216 | 58.954  | 26.365 |
| 24mon      | 5 | 0       | 93.216  | 30.976  | 13.853 |
| 34mon      | 4 | 0       | 42.008  | 43.012  | 21.506 |

| Source of Variation | DF | SS         | MS        | F      | P      |
|---------------------|----|------------|-----------|--------|--------|
| Between Groups      | 3  | 123710.681 | 41236.894 | 11.697 | <0.001 |
| Residual            | 14 | 49354.757  | 3525.340  |        |        |
| Total               | 17 | 173065.438 |           |        |        |

The differences in the mean values among the treatment groups are greater than would be expected by chance; there is a statistically significant difference (P = <0.001).

Power of performed test with alpha = 0.050: 0.993

All Pairwise Multiple Comparison Procedures (Holm-Sidak method):  
Overall significance level = 0.05

Comparisons for factor:

| Comparison      | Diff of Means | t     | Unadjusted P | Critical Level | Significant? |
|-----------------|---------------|-------|--------------|----------------|--------------|
| 4mon vs. 34mon  | 234.535       | 5.586 | <0.001       | 0.009          | Yes          |
| 4mon vs. 24mon  | 183.327       | 4.603 | <0.001       | 0.010          | Yes          |
| 4mon vs. 12mon  | 151.327       | 3.799 | 0.002        | 0.013          | Yes          |
| 12mon vs. 34mon | 83.209        | 2.089 | 0.055        | 0.017          | No           |
| 24mon vs. 34mon | 51.208        | 1.286 | 0.219        | 0.025          | No           |
| 12mon vs. 24mon | 32.000        | 0.852 | 0.408        | 0.050          | No           |

## One Way Analysis of Variance

Data source: SSP#2201

Normality Test: Passed (P > 0.050)

Equal Variance Test: Passed (P = 0.081)

| Group Name | N | Missing | Mean    | Std Dev | SEM     |
|------------|---|---------|---------|---------|---------|
| 4mon       | 4 | 0       | 252.853 | 53.290  | 26.645  |
| 12mon      | 5 | 0       | 286.818 | 79.227  | 35.431  |
| 24mon      | 5 | 0       | 502.946 | 161.616 | 72.277  |
| 34mon      | 4 | 0       | 678.433 | 206.795 | 103.397 |

| Source of Variation | DF | SS         | MS         | F     | P     |
|---------------------|----|------------|------------|-------|-------|
| Between Groups      | 3  | 501268.502 | 167089.501 | 8.781 | 0.002 |
| Residual            | 14 | 266398.073 | 19028.434  |       |       |
| Total               | 17 | 767666.575 |            |       |       |

The differences in the mean values among the treatment groups are greater than would be expected by chance; there is a statistically significant difference (P = 0.002).

Power of performed test with alpha = 0.050: 0.959

All Pairwise Multiple Comparison Procedures (Holm-Sidak method):  
Overall significance level = 0.05

Comparisons for factor:

| Comparison      | Diff of Means | t     | Unadjusted P | Critical Level | Significant? |
|-----------------|---------------|-------|--------------|----------------|--------------|
| 34mon vs. 4mon  | 425.580       | 4.363 | <0.001       | 0.009          | Yes          |
| 34mon vs. 12mon | 391.615       | 4.232 | <0.001       | 0.010          | Yes          |
| 24mon vs. 4mon  | 250.093       | 2.703 | 0.017        | 0.013          | Yes          |
| 24mon vs. 12mon | 216.128       | 2.477 | 0.027        | 0.017          | Yes          |
| 34mon vs. 24mon | 175.487       | 1.896 | 0.079        | 0.025          | No           |
| 12mon vs. 4mon  | 33.965        | 0.367 | 0.719        | 0.050          | No           |

## One Way Analysis of Variance

Data source: SSP#2403

Normality Test: Passed (P > 0.050)

Equal Variance Test: Passed (P = 0.597)

| Group Name | N | Missing | Mean     | Std Dev | SEM     |
|------------|---|---------|----------|---------|---------|
| 4m         | 4 | 0       | 1735.205 | 823.336 | 411.668 |
| 12m        | 5 | 0       | 1695.292 | 475.865 | 212.813 |
| 24m        | 5 | 0       | 2885.556 | 473.963 | 211.963 |
| 34m        | 4 | 0       | 2806.155 | 511.699 | 255.849 |

| Source of Variation | DF | SS           | MS          | F     | P     |
|---------------------|----|--------------|-------------|-------|-------|
| Between Groups      | 3  | 5837421.337  | 1945807.112 | 5.892 | 0.008 |
| Residual            | 14 | 4623505.122  | 330250.366  |       |       |
| Total               | 17 | 10460926.459 |             |       |       |

The differences in the mean values among the treatment groups are greater than would be expected by chance; there is a statistically significant difference (P = 0.008).

Power of performed test with alpha = 0.050: 0.811

All Pairwise Multiple Comparison Procedures (Holm-Sidak method):  
Overall significance level = 0.05

Comparisons for factor:

| Comparison  | Diff of Means | t     | Unadjusted P | Critical Level | Significant? |
|-------------|---------------|-------|--------------|----------------|--------------|
| 24m vs. 12m | 1190.264      | 3.275 | 0.006        | 0.009          | Yes          |
| 24m vs. 4m  | 1150.351      | 2.984 | 0.010        | 0.010          | Yes          |
| 34m vs. 12m | 1110.863      | 2.882 | 0.012        | 0.013          | Yes          |
| 34m vs. 4m  | 1070.950      | 2.635 | 0.020        | 0.017          | Yes          |
| 24m vs. 34m | 79.401        | 0.206 | 0.840        | 0.025          | No           |
| 4m vs. 12m  | 39.913        | 0.104 | 0.919        | 0.050          | No           |

## One Way Analysis of Variance

Data source: SSP#2406

Normality Test: Failed (P = 0.011)

Equal Variance Test: Passed (P = 0.106)

| Group Name | N | Missing | Mean    | Std Dev | SEM     |
|------------|---|---------|---------|---------|---------|
| 4m         | 4 | 0       | 108.772 | 38.037  | 19.019  |
| 12m        | 5 | 0       | 460.390 | 203.294 | 90.916  |
| 24m        | 5 | 0       | 678.802 | 225.968 | 101.056 |
| 34m        | 4 | 0       | 426.173 | 346.309 | 173.154 |

| Source of Variation | DF | SS          | MS         | F     | P     |
|---------------------|----|-------------|------------|-------|-------|
| Between Groups      | 3  | 726427.732  | 242142.577 | 4.620 | 0.019 |
| Residual            | 14 | 733688.349  | 52406.311  |       |       |
| Total               | 17 | 1460116.081 |            |       |       |

The differences in the mean values among the treatment groups are greater than would be expected by chance; there is a statistically significant difference (P = 0.019).

Power of performed test with alpha = 0.050: 0.667

The power of the performed test (0.667) is below the desired power of 0.800. You should interpret the negative findings cautiously.

All Pairwise Multiple Comparison Procedures (Holm-Sidak method):  
Overall significance level = 0.05

Comparisons for factor:

| Comparison  | Diff of Means | t     | Unadjusted P | Critical Level | Significant? |
|-------------|---------------|-------|--------------|----------------|--------------|
| 24m vs. 4m  | 570.029       | 3.712 | 0.002        | 0.009          | Yes          |
| 12m vs. 4m  | 351.618       | 2.290 | 0.038        | 0.010          | Yes          |
| 34m vs. 4m  | 317.400       | 1.961 | 0.070        | 0.013          | No           |
| 24m vs. 34m | 252.629       | 1.645 | 0.122        | 0.017          | No           |
| 24m vs. 12m | 218.412       | 1.509 | 0.154        | 0.025          | No           |
| 12m vs. 34m | 34.217        | 0.223 | 0.827        | 0.050          | No           |



## One Way Analysis of Variance

Data source: SSP#2506

Normality Test: Passed (P > 0.050)

Equal Variance Test: Passed (P = 0.598)

| Group Name | N | Missing | Mean    | Std Dev | SEM    |
|------------|---|---------|---------|---------|--------|
| 4mon       | 4 | 0       | 146.120 | 47.971  | 23.986 |
| 12mon      | 5 | 0       | 147.990 | 78.213  | 34.978 |
| 24mon      | 5 | 0       | 290.012 | 52.307  | 23.392 |
| 34mon      | 4 | 0       | 432.150 | 101.271 | 50.635 |

| Source of Variation | DF | SS         | MS        | F      | P      |
|---------------------|----|------------|-----------|--------|--------|
| Between Groups      | 3  | 235913.178 | 78637.726 | 15.064 | <0.001 |
| Residual            | 14 | 73084.031  | 5220.288  |        |        |
| Total               | 17 | 308997.210 |           |        |        |

The differences in the mean values among the treatment groups are greater than would be expected by chance; there is a statistically significant difference (P = <0.001).

Power of performed test with alpha = 0.050: 0.999

All Pairwise Multiple Comparison Procedures (Holm-Sidak method):  
Overall significance level = 0.05

Comparisons for factor:

| Comparison      | Diff of Means | t      | Unadjusted P | Critical Level | Significant? |
|-----------------|---------------|--------|--------------|----------------|--------------|
| 34mon vs. 12mon | 284.160       | 5.863  | <0.001       | 0.009          | Yes          |
| 34mon vs. 4mon  | 286.030       | 5.599  | <0.001       | 0.010          | Yes          |
| 24mon vs. 12mon | 142.022       | 3.108  | 0.008        | 0.013          | Yes          |
| 24mon vs. 4mon  | 143.892       | 2.969  | 0.010        | 0.017          | Yes          |
| 34mon vs. 24mon | 142.138       | 2.933  | 0.011        | 0.025          | Yes          |
| 12mon vs. 4mon  | 1.870         | 0.0386 | 0.970        | 0.050          | No           |

## One Way Analysis of Variance

Data source: SSP#2825

Normality Test: Passed (P > 0.050)

Equal Variance Test: Passed (P = 0.545)

| Group Name | N | Missing | Mean    | Std Dev | SEM    |
|------------|---|---------|---------|---------|--------|
| 4mon       | 4 | 0       | 120.850 | 38.373  | 19.187 |
| 12mon      | 5 | 0       | 55.564  | 21.377  | 9.560  |
| 24mon      | 5 | 0       | 28.492  | 13.491  | 6.033  |
| 34mon      | 4 | 0       | 26.613  | 9.718   | 4.859  |

| Source of Variation | DF | SS        | MS       | F      | P      |
|---------------------|----|-----------|----------|--------|--------|
| Between Groups      | 3  | 24060.739 | 8020.246 | 15.473 | <0.001 |
| Residual            | 14 | 7256.812  | 518.344  |        |        |
| Total               | 17 | 31317.552 |          |        |        |

The differences in the mean values among the treatment groups are greater than would be expected by chance; there is a statistically significant difference (P = <0.001).

Power of performed test with alpha = 0.050: 0.999

All Pairwise Multiple Comparison Procedures (Holm-Sidak method):  
Overall significance level = 0.05

Comparisons for factor:

| Comparison      | Diff of Means | t     | Unadjusted P | Critical Level | Significant? |
|-----------------|---------------|-------|--------------|----------------|--------------|
| 4mon vs. 24mon  | 92.358        | 6.047 | <0.001       | 0.009          | Yes          |
| 4mon vs. 34mon  | 94.238        | 5.854 | <0.001       | 0.010          | Yes          |
| 4mon vs. 12mon  | 65.286        | 4.275 | <0.001       | 0.013          | Yes          |
| 12mon vs. 34mon | 28.951        | 1.896 | 0.079        | 0.017          | No           |
| 12mon vs. 24mon | 27.072        | 1.880 | 0.081        | 0.025          | No           |
| 24mon vs. 34mon | 1.880         | 0.123 | 0.904        | 0.050          | No           |

## One Way Analysis of Variance

Data source: SSP#3203

Normality Test: Passed (P > 0.050)

Equal Variance Test: Passed (P = 0.091)

| Group Name | N | Missing | Mean     | Std Dev | SEM     |
|------------|---|---------|----------|---------|---------|
| 4mon       | 4 | 0       | 1061.065 | 70.049  | 35.025  |
| 12mon      | 5 | 0       | 1081.938 | 293.528 | 131.270 |
| 24mon      | 5 | 0       | 1266.206 | 314.925 | 140.839 |
| 34mon      | 4 | 0       | 1648.948 | 118.242 | 59.121  |

| Source of Variation | DF | SS          | MS         | F     | P     |
|---------------------|----|-------------|------------|-------|-------|
| Between Groups      | 3  | 921597.086  | 307199.029 | 5.389 | 0.011 |
| Residual            | 14 | 798010.373  | 57000.741  |       |       |
| Total               | 17 | 1719607.459 |            |       |       |

The differences in the mean values among the treatment groups are greater than would be expected by chance; there is a statistically significant difference (P = 0.011).

Power of performed test with alpha = 0.050: 0.761

The power of the performed test (0.761) is below the desired power of 0.800. You should interpret the negative findings cautiously.

All Pairwise Multiple Comparison Procedures (Holm-Sidak method):  
Overall significance level = 0.05

Comparisons for factor:

| Comparison      | Diff of Means | t     | Unadjusted P | Critical Level | Significant? |
|-----------------|---------------|-------|--------------|----------------|--------------|
| 34mon vs. 12mon | 567.010       | 3.540 | 0.003        | 0.009          | Yes          |
| 34mon vs. 4mon  | 587.882       | 3.482 | 0.004        | 0.010          | Yes          |
| 34mon vs. 24mon | 382.742       | 2.390 | 0.031        | 0.013          | Yes          |
| 24mon vs. 4mon  | 205.141       | 1.281 | 0.221        | 0.017          | No           |
| 24mon vs. 12mon | 184.268       | 1.220 | 0.242        | 0.025          | No           |
| 12mon vs. 4mon  | 20.873        | 0.130 | 0.898        | 0.050          | No           |

## One Way Analysis of Variance

Data source: SSP#3303

Normality Test: Passed (P > 0.050)

Equal Variance Test: Failed (P = <0.001)

| Group Name | N | Missing | Mean    | Std Dev | SEM    |
|------------|---|---------|---------|---------|--------|
| 4mon       | 4 | 0       | 77.537  | 31.798  | 15.899 |
| 12mon      | 5 | 0       | 226.810 | 65.568  | 29.323 |
| 24mon      | 5 | 0       | 369.928 | 60.927  | 27.247 |
| 34mon      | 4 | 0       | 318.517 | 106.758 | 53.379 |

| Source of Variation | DF | SS         | MS        | F      | P      |
|---------------------|----|------------|-----------|--------|--------|
| Between Groups      | 3  | 212098.144 | 70699.381 | 14.289 | <0.001 |
| Residual            | 14 | 69270.468  | 4947.891  |        |        |
| Total               | 17 | 281368.612 |           |        |        |

The differences in the mean values among the treatment groups are greater than would be expected by chance; there is a statistically significant difference (P = <0.001).

Power of performed test with alpha = 0.050: 0.999

All Pairwise Multiple Comparison Procedures (Holm-Sidak method):  
Overall significance level = 0.05

Comparisons for factor:

| Comparison      | Diff of Means | t     | Unadjusted P | Critical Level | Significant? |
|-----------------|---------------|-------|--------------|----------------|--------------|
| 24mon vs. 4mon  | 292.391       | 6.197 | <0.001       | 0.009          | Yes          |
| 34mon vs. 4mon  | 240.980       | 4.845 | <0.001       | 0.010          | Yes          |
| 24mon vs. 12mon | 143.118       | 3.217 | 0.006        | 0.013          | Yes          |
| 12mon vs. 4mon  | 149.273       | 3.163 | 0.007        | 0.017          | Yes          |
| 34mon vs. 12mon | 91.707        | 1.944 | 0.072        | 0.025          | No           |
| 24mon vs. 34mon | 51.411        | 1.090 | 0.294        | 0.050          | No           |

## One Way Analysis of Variance

Data source: SSP#3401

Normality Test: Passed (P > 0.050)

Equal Variance Test: Failed (P = <0.001)

| Group Name | N | Missing | Mean    | Std Dev | SEM    |
|------------|---|---------|---------|---------|--------|
| 4mon       | 4 | 0       | 157.283 | 16.778  | 8.389  |
| 12mon      | 5 | 0       | 142.702 | 12.455  | 5.570  |
| 24mon      | 5 | 0       | 198.964 | 35.501  | 15.877 |
| 34mon      | 4 | 0       | 227.805 | 37.376  | 18.688 |

| Source of Variation | DF | SS        | MS       | F     | P     |
|---------------------|----|-----------|----------|-------|-------|
| Between Groups      | 3  | 19955.296 | 6651.765 | 8.706 | 0.002 |
| Residual            | 14 | 10697.177 | 764.084  |       |       |
| Total               | 17 | 30652.473 |          |       |       |

The differences in the mean values among the treatment groups are greater than would be expected by chance; there is a statistically significant difference (P = 0.002).

Power of performed test with alpha = 0.050: 0.957

All Pairwise Multiple Comparison Procedures (Holm-Sidak method):  
Overall significance level = 0.05

Comparisons for factor:

| Comparison      | Diff of Means | t     | Unadjusted P | Critical Level | Significant? |
|-----------------|---------------|-------|--------------|----------------|--------------|
| 34mon vs. 12mon | 85.103        | 4.590 | <0.001       | 0.009          | Yes          |
| 34mon vs. 4mon  | 70.522        | 3.608 | 0.003        | 0.010          | Yes          |
| 24mon vs. 12mon | 56.262        | 3.218 | 0.006        | 0.013          | Yes          |
| 24mon vs. 4mon  | 41.682        | 2.248 | 0.041        | 0.017          | Yes          |
| 34mon vs. 24mon | 28.841        | 1.555 | 0.142        | 0.025          | No           |
| 4mon vs. 12mon  | 14.580        | 0.786 | 0.445        | 0.050          | No           |

## One Way Analysis of Variance

Data source: SSP#3408

Normality Test: Passed (P > 0.050)

Equal Variance Test: Passed (P = 0.642)

| Group Name | N | Missing | Mean    | Std Dev | SEM    |
|------------|---|---------|---------|---------|--------|
| 4mon       | 4 | 0       | 329.887 | 78.160  | 39.080 |
| 12mon      | 5 | 0       | 170.016 | 61.823  | 27.648 |
| 24mon      | 5 | 0       | 76.052  | 28.835  | 12.895 |
| 34mon      | 4 | 0       | 76.933  | 41.969  | 20.985 |

| Source of Variation | DF | SS         | MS        | F      | P      |
|---------------------|----|------------|-----------|--------|--------|
| Between Groups      | 3  | 178757.998 | 59585.999 | 19.756 | <0.001 |
| Residual            | 14 | 42225.658  | 3016.118  |        |        |
| Total               | 17 | 220983.655 |           |        |        |

The differences in the mean values among the treatment groups are greater than would be expected by chance; there is a statistically significant difference (P = <0.001).

Power of performed test with alpha = 0.050: 1.000

All Pairwise Multiple Comparison Procedures (Holm-Sidak method):  
Overall significance level = 0.05

Comparisons for factor:

| Comparison      | Diff of Means | t      | Unadjusted P | Critical Level | Significant? |
|-----------------|---------------|--------|--------------|----------------|--------------|
| 4mon vs. 24mon  | 253.836       | 6.890  | <0.001       | 0.009          | Yes          |
| 4mon vs. 34mon  | 252.955       | 6.514  | <0.001       | 0.010          | Yes          |
| 4mon vs. 12mon  | 159.872       | 4.340  | <0.001       | 0.013          | Yes          |
| 12mon vs. 24mon | 93.964        | 2.705  | 0.017        | 0.017          | Yes          |
| 12mon vs. 34mon | 93.083        | 2.527  | 0.024        | 0.025          | Yes          |
| 34mon vs. 24mon | 0.881         | 0.0239 | 0.981        | 0.050          | No           |

## One Way Analysis of Variance

Data source: SSP#3608

Normality Test: Failed (P = 0.036)

Equal Variance Test: Passed (P = 0.666)

| Group Name | N | Missing | Mean    | Std Dev | SEM    |
|------------|---|---------|---------|---------|--------|
| 4mon       | 4 | 0       | 22.973  | 18.869  | 9.434  |
| 12mon      | 5 | 0       | 142.632 | 73.056  | 32.672 |
| 24mon      | 5 | 0       | 112.362 | 40.463  | 18.096 |
| 34mon      | 4 | 0       | 251.618 | 116.675 | 58.338 |

| Source of Variation | DF | SS         | MS        | F     | P     |
|---------------------|----|------------|-----------|-------|-------|
| Between Groups      | 3  | 107274.425 | 35758.142 | 7.172 | 0.004 |
| Residual            | 14 | 69805.033  | 4986.074  |       |       |
| Total               | 17 | 177079.457 |           |       |       |

The differences in the mean values among the treatment groups are greater than would be expected by chance; there is a statistically significant difference (P = 0.004).

Power of performed test with alpha = 0.050: 0.900

All Pairwise Multiple Comparison Procedures (Holm-Sidak method):  
Overall significance level = 0.05

Comparisons for factor:

| Comparison      | Diff of Means | t     | Unadjusted P | Critical Level | Significant? |
|-----------------|---------------|-------|--------------|----------------|--------------|
| 34mon vs. 4mon  | 228.645       | 4.579 | <0.001       | 0.009          | Yes          |
| 34mon vs. 24mon | 139.255       | 2.940 | 0.011        | 0.010          | Yes          |
| 12mon vs. 4mon  | 119.660       | 2.526 | 0.024        | 0.013          | Yes          |
| 34mon vs. 12mon | 108.986       | 2.301 | 0.037        | 0.017          | Yes          |
| 24mon vs. 4mon  | 89.389        | 1.887 | 0.080        | 0.025          | No           |
| 12mon vs. 24mon | 30.270        | 0.678 | 0.509        | 0.050          | No           |

## One Way Analysis of Variance

Data source: SSP#3609

Normality Test: Passed (P > 0.050)

Equal Variance Test: Passed (P = 0.574)

| Group Name | N | Missing | Mean    | Std Dev | SEM     |
|------------|---|---------|---------|---------|---------|
| 4m         | 4 | 0       | 165.310 | 93.472  | 46.736  |
| 12m        | 5 | 0       | 590.378 | 164.470 | 73.553  |
| 24m        | 5 | 0       | 722.490 | 120.082 | 53.702  |
| 34m        | 4 | 0       | 361.560 | 289.602 | 144.801 |

| Source of Variation | DF | SS          | MS         | F     | P     |
|---------------------|----|-------------|------------|-------|-------|
| Between Groups      | 3  | 807098.583  | 269032.861 | 8.489 | 0.002 |
| Residual            | 14 | 443699.522  | 31692.823  |       |       |
| Total               | 17 | 1250798.105 |            |       |       |

The differences in the mean values among the treatment groups are greater than would be expected by chance; there is a statistically significant difference (P = 0.002).

Power of performed test with alpha = 0.050: 0.951

All Pairwise Multiple Comparison Procedures (Holm-Sidak method):  
Overall significance level = 0.05

Comparisons for factor:

| Comparison  | Diff of Means | t     | Unadjusted P | Critical Level | Significant? |
|-------------|---------------|-------|--------------|----------------|--------------|
| 24m vs. 4m  | 557.180       | 4.666 | <0.001       | 0.009          | Yes          |
| 12m vs. 4m  | 425.068       | 3.559 | 0.003        | 0.010          | Yes          |
| 24m vs. 34m | 360.930       | 3.022 | 0.009        | 0.013          | Yes          |
| 12m vs. 34m | 228.818       | 1.916 | 0.076        | 0.017          | No           |
| 34m vs. 4m  | 196.250       | 1.559 | 0.141        | 0.025          | No           |
| 24m vs. 12m | 132.112       | 1.173 | 0.260        | 0.050          | No           |



## One Way Analysis of Variance

Data source: SSP#3620

Normality Test: Passed (P > 0.050)

Equal Variance Test: Passed (P = 0.056)

| Group Name | N | Missing | Mean     | Std Dev | SEM     |
|------------|---|---------|----------|---------|---------|
| 4mon       | 4 | 0       | 1061.488 | 287.006 | 143.503 |
| 12mon      | 5 | 0       | 556.708  | 230.907 | 103.265 |
| 24mon      | 5 | 0       | 238.160  | 59.602  | 26.655  |
| 34mon      | 4 | 0       | 152.320  | 113.043 | 56.521  |

| Source of Variation | DF | SS          | MS         | F      | P      |
|---------------------|----|-------------|------------|--------|--------|
| Between Groups      | 3  | 2101864.606 | 700621.535 | 19.123 | <0.001 |
| Residual            | 14 | 512934.534  | 36638.181  |        |        |
| Total               | 17 | 2614799.141 |            |        |        |

The differences in the mean values among the treatment groups are greater than would be expected by chance; there is a statistically significant difference (P = <0.001).

Power of performed test with alpha = 0.050: 1.000

All Pairwise Multiple Comparison Procedures (Holm-Sidak method):

Overall significance level = 0.05

Comparisons for factor:

| Comparison      | Diff of Means | t     | Unadjusted P | Critical Level | Significant? |
|-----------------|---------------|-------|--------------|----------------|--------------|
| 4mon vs. 34mon  | 909.168       | 6.717 | <0.001       | 0.009          | Yes          |
| 4mon vs. 24mon  | 823.327       | 6.412 | <0.001       | 0.010          | Yes          |
| 4mon vs. 12mon  | 504.779       | 3.931 | 0.002        | 0.013          | Yes          |
| 12mon vs. 34mon | 404.388       | 3.149 | 0.007        | 0.017          | Yes          |
| 12mon vs. 24mon | 318.548       | 2.631 | 0.020        | 0.025          | Yes          |
| 24mon vs. 34mon | 85.840        | 0.669 | 0.515        | 0.050          | No           |

## One Way Analysis of Variance

Data source: SSP#4207

Normality Test: Passed (P > 0.050)

Equal Variance Test: Passed (P = 0.147)

| Group Name | N | Missing | Mean     | Std Dev | SEM    |
|------------|---|---------|----------|---------|--------|
| 4m         | 4 | 0       | 855.412  | 117.257 | 58.629 |
| 12m        | 5 | 0       | 944.168  | 90.835  | 40.623 |
| 24m        | 5 | 0       | 1196.370 | 220.779 | 98.735 |
| 34m        | 4 | 0       | 1244.955 | 92.397  | 46.198 |

| Source of Variation | DF | SS         | MS         | F     | P     |
|---------------------|----|------------|------------|-------|-------|
| Between Groups      | 3  | 464294.306 | 154764.769 | 7.349 | 0.003 |
| Residual            | 14 | 294836.291 | 21059.735  |       |       |
| Total               | 17 | 759130.598 |            |       |       |

The differences in the mean values among the treatment groups are greater than would be expected by chance; there is a statistically significant difference (P = 0.003).

Power of performed test with alpha = 0.050: 0.909

All Pairwise Multiple Comparison Procedures (Holm-Sidak method):  
Overall significance level = 0.05

Comparisons for factor:

| Comparison  | Diff of Means | t     | Unadjusted P | Critical Level | Significant? |
|-------------|---------------|-------|--------------|----------------|--------------|
| 34m vs. 4m  | 389.543       | 3.796 | 0.002        | 0.009          | Yes          |
| 24m vs. 4m  | 340.958       | 3.502 | 0.004        | 0.010          | Yes          |
| 34m vs. 12m | 300.787       | 3.090 | 0.008        | 0.013          | Yes          |
| 24m vs. 12m | 252.202       | 2.748 | 0.016        | 0.017          | Yes          |
| 12m vs. 4m  | 88.756        | 0.912 | 0.377        | 0.025          | No           |
| 34m vs. 24m | 48.585        | 0.499 | 0.625        | 0.050          | No           |

## One Way Analysis of Variance

Data source: SSP#4212

Normality Test: Passed (P > 0.050)

Equal Variance Test: Failed (P = 0.045)

Test execution ended by user request, ANOVA on Ranks begun

## Kruskal-Wallis One Way Analysis of Variance on Ranks

Data source: 4212 in NIAset1

| Group | N | Missing | Median  | 25%     | 75%     |
|-------|---|---------|---------|---------|---------|
| 4m    | 4 | 0       | 162.290 | 147.115 | 178.485 |
| 12m   | 5 | 0       | 197.860 | 187.615 | 328.790 |
| 24m   | 5 | 0       | 427.570 | 236.633 | 631.087 |
| 34m   | 4 | 0       | 465.495 | 342.300 | 528.595 |

H = 10.763 with 3 degrees of freedom. (P = 0.013)

The differences in the median values among the treatment groups are greater than would be expected by chance; there is a statistically significant difference (P = 0.013)

To isolate the group or groups that differ from the others use a multiple comparison procedure.

All Pairwise Multiple Comparison Procedures (Dunn's Method) :

| Comparison | Diff of Ranks | Q     | P<0.05      |
|------------|---------------|-------|-------------|
| 34m vs 4m  | 10.750        | 2.848 | Yes         |
| 34m vs 12m | 5.100         | 1.424 | No          |
| 34m vs 24m | 0.700         | 0.195 | Do Not Test |
| 24m vs 4m  | 10.050        | 2.806 | Yes         |
| 24m vs 12m | 4.400         | 1.303 | Do Not Test |
| 12m vs 4m  | 5.650         | 1.578 | No          |

Note: The multiple comparisons on ranks do not include an adjustment for ties.

## One Way Analysis of Variance

Data source: SSP#4216

Normality Test: Passed (P > 0.050)

Equal Variance Test: Passed (P = 0.187)

| Group Name | N | Missing | Mean    | Std Dev | SEM    |
|------------|---|---------|---------|---------|--------|
| 4mon       | 4 | 0       | 108.538 | 33.545  | 16.772 |
| 12mon      | 5 | 0       | 119.466 | 64.755  | 28.960 |
| 24mon      | 5 | 0       | 316.066 | 177.844 | 79.534 |
| 34mon      | 4 | 0       | 266.590 | 85.733  | 42.866 |

| Source of Variation | DF | SS         | MS        | F     | P     |
|---------------------|----|------------|-----------|-------|-------|
| Between Groups      | 3  | 150644.201 | 50214.734 | 4.167 | 0.026 |
| Residual            | 14 | 168713.210 | 12050.944 |       |       |
| Total               | 17 | 319357.411 |           |       |       |

The differences in the mean values among the treatment groups are greater than would be expected by chance; there is a statistically significant difference (P = 0.026).

Power of performed test with alpha = 0.050: 0.601

The power of the performed test (0.601) is below the desired power of 0.800. You should interpret the negative findings cautiously.

All Pairwise Multiple Comparison Procedures (Holm-Sidak method):  
Overall significance level = 0.05

Comparisons for factor:

| Comparison      | Diff of Means | t     | Unadjusted P | Critical Level | Significant? |
|-----------------|---------------|-------|--------------|----------------|--------------|
| 24mon vs. 12mon | 196.600       | 2.832 | 0.013        | 0.009          | Yes          |
| 24mon vs. 4mon  | 207.529       | 2.818 | 0.014        | 0.010          | Yes          |
| 34mon vs. 4mon  | 158.053       | 2.036 | 0.061        | 0.013          | No           |
| 34mon vs. 12mon | 147.124       | 1.998 | 0.066        | 0.017          | No           |
| 24mon vs. 34mon | 49.476        | 0.672 | 0.513        | 0.025          | No           |
| 12mon vs. 4mon  | 10.928        | 0.148 | 0.884        | 0.050          | No           |

## One Way Analysis of Variance

Data source: SSP#4217

Normality Test: Passed (P > 0.050)

Equal Variance Test: Passed (P = 0.181)

| Group Name | N | Missing | Mean     | Std Dev | SEM     |
|------------|---|---------|----------|---------|---------|
| 4mon       | 4 | 0       | 634.530  | 156.286 | 78.143  |
| 12mon      | 5 | 0       | 1979.808 | 513.757 | 229.759 |
| 24mon      | 5 | 0       | 2801.960 | 953.836 | 426.569 |
| 34mon      | 4 | 0       | 2077.450 | 994.454 | 497.227 |

| Source of Variation | DF | SS           | MS          | F     | P     |
|---------------------|----|--------------|-------------|-------|-------|
| Between Groups      | 3  | 10613895.880 | 3537965.293 | 6.403 | 0.006 |
| Residual            | 14 | 7735091.689  | 552506.549  |       |       |
| Total               | 17 | 18348987.570 |             |       |       |

The differences in the mean values among the treatment groups are greater than would be expected by chance; there is a statistically significant difference (P = 0.006).

Power of performed test with alpha = 0.050: 0.852

All Pairwise Multiple Comparison Procedures (Holm-Sidak method):  
Overall significance level = 0.05

Comparisons for factor:

| Comparison      | Diff of Means | t     | Unadjusted P | Critical Level | Significant? |
|-----------------|---------------|-------|--------------|----------------|--------------|
| 24mon vs. 4mon  | 2167.430      | 4.347 | <0.001       | 0.009          | Yes          |
| 34mon vs. 4mon  | 1442.920      | 2.745 | 0.016        | 0.010          | Yes          |
| 12mon vs. 4mon  | 1345.278      | 2.698 | 0.017        | 0.013          | Yes          |
| 24mon vs. 12mon | 822.152       | 1.749 | 0.102        | 0.017          | No           |
| 24mon vs. 34mon | 724.510       | 1.453 | 0.168        | 0.025          | No           |
| 34mon vs. 12mon | 97.642        | 0.196 | 0.848        | 0.050          | No           |

## One Way Analysis of Variance

Data source: SSP#4417

Normality Test: Passed (P > 0.050)

Equal Variance Test: Passed (P = 0.371)

| Group Name | N | Missing | Mean    | Std Dev | SEM    |
|------------|---|---------|---------|---------|--------|
| 4mon       | 4 | 0       | 541.080 | 107.444 | 53.722 |
| 12mon      | 5 | 0       | 963.748 | 191.868 | 85.806 |
| 24mon      | 5 | 0       | 957.322 | 155.104 | 69.365 |
| 34mon      | 4 | 0       | 888.420 | 98.273  | 49.137 |

| Source of Variation | DF | SS         | MS         | F     | P     |
|---------------------|----|------------|------------|-------|-------|
| Between Groups      | 3  | 509883.457 | 169961.152 | 7.748 | 0.003 |
| Residual            | 14 | 307088.834 | 21934.917  |       |       |
| Total               | 17 | 816972.291 |            |       |       |

The differences in the mean values among the treatment groups are greater than would be expected by chance; there is a statistically significant difference (P = 0.003).

Power of performed test with alpha = 0.050: 0.927

All Pairwise Multiple Comparison Procedures (Holm-Sidak method):  
Overall significance level = 0.05

Comparisons for factor:

| Comparison      | Diff of Means | t      | Unadjusted P | Critical Level | Significant? |
|-----------------|---------------|--------|--------------|----------------|--------------|
| 12mon vs. 4mon  | 422.668       | 4.254  | <0.001       | 0.009          | Yes          |
| 24mon vs. 4mon  | 416.242       | 4.190  | <0.001       | 0.010          | Yes          |
| 34mon vs. 4mon  | 347.340       | 3.317  | 0.005        | 0.013          | Yes          |
| 12mon vs. 34mon | 75.328        | 0.758  | 0.461        | 0.017          | No           |
| 24mon vs. 34mon | 68.902        | 0.694  | 0.499        | 0.025          | No           |
| 12mon vs. 24mon | 6.426         | 0.0686 | 0.946        | 0.050          | No           |

## One Way Analysis of Variance

Data source: SSP#4421

Normality Test: Passed (P > 0.050)

Equal Variance Test: Passed (P = 0.243)

| Group Name | N | Missing | Mean     | Std Dev | SEM    |
|------------|---|---------|----------|---------|--------|
| 4mon       | 4 | 0       | 657.310  | 68.689  | 34.344 |
| 12mon      | 5 | 0       | 737.562  | 217.883 | 97.440 |
| 24mon      | 5 | 0       | 1051.112 | 171.795 | 76.829 |
| 34mon      | 4 | 0       | 958.943  | 157.783 | 78.891 |

| Source of Variation | DF | SS         | MS         | F     | P     |
|---------------------|----|------------|------------|-------|-------|
| Between Groups      | 3  | 460780.752 | 153593.584 | 5.419 | 0.011 |
| Residual            | 14 | 396786.462 | 28341.890  |       |       |
| Total               | 17 | 857567.213 |            |       |       |

The differences in the mean values among the treatment groups are greater than would be expected by chance; there is a statistically significant difference (P = 0.011).

Power of performed test with alpha = 0.050: 0.764

The power of the performed test (0.764) is below the desired power of 0.800. You should interpret the negative findings cautiously.

All Pairwise Multiple Comparison Procedures (Holm-Sidak method):  
Overall significance level = 0.05

Comparisons for factor:

| Comparison      | Diff of Means | t     | Unadjusted P | Critical Level | Significant? |
|-----------------|---------------|-------|--------------|----------------|--------------|
| 24mon vs. 4mon  | 393.802       | 3.487 | 0.004        | 0.009          | Yes          |
| 24mon vs. 12mon | 313.550       | 2.945 | 0.011        | 0.010          | Yes          |
| 34mon vs. 4mon  | 301.633       | 2.534 | 0.024        | 0.013          | Yes          |
| 34mon vs. 12mon | 221.380       | 1.960 | 0.070        | 0.017          | No           |
| 24mon vs. 34mon | 92.169        | 0.816 | 0.428        | 0.025          | No           |
| 12mon vs. 4mon  | 80.252        | 0.711 | 0.489        | 0.050          | No           |

## One Way Analysis of Variance

Data source: SSP#4606

Normality Test: Passed (P > 0.050)

Equal Variance Test: Passed (P = 0.654)

| Group Name | N | Missing | Mean     | Std Dev | SEM     |
|------------|---|---------|----------|---------|---------|
| 4mon       | 4 | 0       | 2006.058 | 224.518 | 112.259 |
| 12mon      | 5 | 0       | 1753.770 | 523.722 | 234.216 |
| 24mon      | 5 | 0       | 2204.120 | 579.072 | 258.969 |
| 34mon      | 4 | 0       | 2821.668 | 407.480 | 203.740 |

| Source of Variation | DF | SS          | MS         | F     | P     |
|---------------------|----|-------------|------------|-------|-------|
| Between Groups      | 3  | 2678158.181 | 892719.394 | 4.048 | 0.029 |
| Residual            | 14 | 3087780.725 | 220555.766 |       |       |
| Total               | 17 | 5765938.906 |            |       |       |

The differences in the mean values among the treatment groups are greater than would be expected by chance; there is a statistically significant difference (P = 0.029).

Power of performed test with alpha = 0.050: 0.582

The power of the performed test (0.582) is below the desired power of 0.800. You should interpret the negative findings cautiously.

All Pairwise Multiple Comparison Procedures (Holm-Sidak method):  
Overall significance level = 0.05

Comparisons for factor:

| Comparison      | Diff of Means | t     | Unadjusted P | Critical Level | Significant? |
|-----------------|---------------|-------|--------------|----------------|--------------|
| 34mon vs. 12mon | 1067.898      | 3.390 | 0.004        | 0.009          | Yes          |
| 34mon vs. 4mon  | 815.610       | 2.456 | 0.028        | 0.010          | Yes          |
| 34mon vs. 24mon | 617.548       | 1.960 | 0.070        | 0.013          | No           |
| 24mon vs. 12mon | 450.350       | 1.516 | 0.152        | 0.017          | No           |
| 4mon vs. 12mon  | 252.288       | 0.801 | 0.437        | 0.025          | No           |
| 24mon vs. 4mon  | 198.062       | 0.629 | 0.540        | 0.050          | No           |



## One Way Analysis of Variance

Data source: SSP#4608

Normality Test: Passed (P > 0.050)

Equal Variance Test: Passed (P = 0.078)

| Group Name | N | Missing | Mean   | Std Dev | SEM    |
|------------|---|---------|--------|---------|--------|
| 4mon       | 4 | 0       | 32.015 | 30.563  | 15.281 |
| 12mon      | 5 | 0       | 56.380 | 23.937  | 10.705 |
| 24mon      | 5 | 0       | 90.668 | 17.653  | 7.895  |
| 34mon      | 4 | 0       | 53.570 | 8.881   | 4.440  |

| Source of Variation | DF | SS        | MS       | F     | P     |
|---------------------|----|-----------|----------|-------|-------|
| Between Groups      | 3  | 8065.848  | 2688.616 | 5.723 | 0.009 |
| Residual            | 14 | 6577.303  | 469.807  |       |       |
| Total               | 17 | 14643.151 |          |       |       |

The differences in the mean values among the treatment groups are greater than would be expected by chance; there is a statistically significant difference (P = 0.009).

Power of performed test with alpha = 0.050: 0.795

The power of the performed test (0.795) is below the desired power of 0.800. You should interpret the negative findings cautiously.

All Pairwise Multiple Comparison Procedures (Holm-Sidak method):  
Overall significance level = 0.05

Comparisons for factor:

| Comparison      | Diff of Means | t     | Unadjusted P | Critical Level | Significant? |
|-----------------|---------------|-------|--------------|----------------|--------------|
| 24mon vs. 4mon  | 58.653        | 4.034 | 0.001        | 0.009          | Yes          |
| 24mon vs. 34mon | 37.098        | 2.551 | 0.023        | 0.010          | Yes          |
| 24mon vs. 12mon | 34.288        | 2.501 | 0.025        | 0.013          | Yes          |
| 12mon vs. 4mon  | 24.365        | 1.676 | 0.116        | 0.017          | No           |
| 34mon vs. 4mon  | 21.555        | 1.406 | 0.181        | 0.025          | No           |
| 12mon vs. 34mon | 2.810         | 0.193 | 0.850        | 0.050          | No           |

## One Way Analysis of Variance

Data source: SSP#4611

Normality Test: Passed (P > 0.050)

Equal Variance Test: Passed (P = 0.264)

| Group Name | N | Missing | Mean     | Std Dev | SEM     |
|------------|---|---------|----------|---------|---------|
| 4mon       | 4 | 0       | 2009.428 | 275.069 | 137.534 |
| 12mon      | 5 | 0       | 2238.712 | 229.435 | 102.607 |
| 24mon      | 5 | 0       | 2952.928 | 688.154 | 307.752 |
| 34mon      | 4 | 0       | 3236.430 | 399.707 | 199.853 |

| Source of Variation | DF | SS          | MS          | F     | P     |
|---------------------|----|-------------|-------------|-------|-------|
| Between Groups      | 3  | 4289597.659 | 1429865.886 | 7.121 | 0.004 |
| Residual            | 14 | 2811072.325 | 200790.880  |       |       |
| Total               | 17 | 7100669.984 |             |       |       |

The differences in the mean values among the treatment groups are greater than would be expected by chance; there is a statistically significant difference (P = 0.004).

Power of performed test with alpha = 0.050: 0.898

All Pairwise Multiple Comparison Procedures (Holm-Sidak method):  
Overall significance level = 0.05

Comparisons for factor:

| Comparison      | Diff of Means | t     | Unadjusted P | Critical Level | Significant? |
|-----------------|---------------|-------|--------------|----------------|--------------|
| 34mon vs. 4mon  | 1227.002      | 3.872 | 0.002        | 0.009          | Yes          |
| 34mon vs. 12mon | 997.718       | 3.319 | 0.005        | 0.010          | Yes          |
| 24mon vs. 4mon  | 943.500       | 3.139 | 0.007        | 0.013          | Yes          |
| 24mon vs. 12mon | 714.216       | 2.520 | 0.024        | 0.017          | Yes          |
| 34mon vs. 24mon | 283.502       | 0.943 | 0.362        | 0.025          | No           |
| 12mon vs. 4mon  | 229.284       | 0.763 | 0.458        | 0.050          | No           |

## One Way Analysis of Variance

Data source: SSP#5208

Normality Test: Passed (P > 0.050)

Equal Variance Test: Failed (P = 0.010)

| Group Name | N | Missing | Mean     | Std Dev | SEM     |
|------------|---|---------|----------|---------|---------|
| 4mon       | 4 | 0       | 4526.915 | 892.921 | 446.460 |
| 12mon      | 5 | 0       | 2799.690 | 696.865 | 311.648 |
| 24mon      | 5 | 0       | 1456.012 | 117.988 | 52.766  |
| 34mon      | 4 | 0       | 1248.782 | 596.571 | 298.286 |

| Source of Variation | DF | SS           | MS          | F      | P      |
|---------------------|----|--------------|-------------|--------|--------|
| Between Groups      | 3  | 28573077.705 | 9524359.235 | 24.431 | <0.001 |
| Residual            | 14 | 5457781.751  | 389841.554  |        |        |
| Total               | 17 | 34030859.457 |             |        |        |

The differences in the mean values among the treatment groups are greater than would be expected by chance; there is a statistically significant difference (P = <0.001).

Power of performed test with alpha = 0.050: 1.000

All Pairwise Multiple Comparison Procedures (Holm-Sidak method):  
Overall significance level = 0.05

Comparisons for factor:

| Comparison      | Diff of Means | t     | Unadjusted P | Critical Level | Significant? |
|-----------------|---------------|-------|--------------|----------------|--------------|
| 4mon vs. 34mon  | 3278.133      | 7.425 | <0.001       | 0.009          | Yes          |
| 4mon vs. 24mon  | 3070.903      | 7.332 | <0.001       | 0.010          | Yes          |
| 4mon vs. 12mon  | 1727.225      | 4.124 | 0.001        | 0.013          | Yes          |
| 12mon vs. 34mon | 1550.907      | 3.703 | 0.002        | 0.017          | Yes          |
| 12mon vs. 24mon | 1343.678      | 3.403 | 0.004        | 0.025          | Yes          |
| 24mon vs. 34mon | 207.230       | 0.495 | 0.628        | 0.050          | No           |

## One Way Analysis of Variance

Data source: SSP#5209

Normality Test: Passed (P > 0.050)

Equal Variance Test: Passed (P = 0.062)

| Group Name | N | Missing | Mean    | Std Dev | SEM    |
|------------|---|---------|---------|---------|--------|
| 4mon       | 4 | 0       | 103.813 | 19.609  | 9.804  |
| 12mon      | 5 | 0       | 128.970 | 53.785  | 24.053 |
| 24mon      | 5 | 0       | 170.560 | 13.726  | 6.139  |
| 34mon      | 4 | 0       | 169.083 | 27.100  | 13.550 |

| Source of Variation | DF | SS        | MS       | F     | P     |
|---------------------|----|-----------|----------|-------|-------|
| Between Groups      | 3  | 13632.914 | 4544.305 | 4.057 | 0.029 |
| Residual            | 14 | 15681.765 | 1120.126 |       |       |
| Total               | 17 | 29314.679 |          |       |       |

The differences in the mean values among the treatment groups are greater than would be expected by chance; there is a statistically significant difference (P = 0.029).

Power of performed test with alpha = 0.050: 0.584

The power of the performed test (0.584) is below the desired power of 0.800. You should interpret the negative findings cautiously.

All Pairwise Multiple Comparison Procedures (Holm-Sidak method):  
Overall significance level = 0.05

Comparisons for factor:

| Comparison      | Diff of Means | t      | Unadjusted P | Critical Level | Significant? |
|-----------------|---------------|--------|--------------|----------------|--------------|
| 24mon vs. 4mon  | 66.748        | 2.973  | 0.010        | 0.009          | Yes          |
| 34mon vs. 4mon  | 65.270        | 2.758  | 0.015        | 0.010          | Yes          |
| 24mon vs. 12mon | 41.590        | 1.965  | 0.070        | 0.013          | No           |
| 34mon vs. 12mon | 40.113        | 1.787  | 0.096        | 0.017          | No           |
| 12mon vs. 4mon  | 25.157        | 1.121  | 0.281        | 0.025          | No           |
| 24mon vs. 34mon | 1.477         | 0.0658 | 0.948        | 0.050          | No           |

## One Way Analysis of Variance

Data source: SSP#5706

Normality Test: Passed (P > 0.050)

Equal Variance Test: Passed (P = 0.910)

| Group Name | N | Missing | Mean    | Std Dev | SEM    |
|------------|---|---------|---------|---------|--------|
| 4mon       | 4 | 0       | 247.175 | 59.430  | 29.715 |
| 12mon      | 5 | 0       | 311.196 | 72.811  | 32.562 |
| 24mon      | 5 | 0       | 400.528 | 99.061  | 44.302 |
| 34mon      | 4 | 0       | 486.962 | 89.701  | 44.850 |

| Source of Variation | DF | SS         | MS        | F     | P     |
|---------------------|----|------------|-----------|-------|-------|
| Between Groups      | 3  | 135504.789 | 45168.263 | 6.643 | 0.005 |
| Residual            | 14 | 95193.038  | 6799.503  |       |       |
| Total               | 17 | 230697.827 |           |       |       |

The differences in the mean values among the treatment groups are greater than would be expected by chance; there is a statistically significant difference (P = 0.005).

Power of performed test with alpha = 0.050: 0.869

All Pairwise Multiple Comparison Procedures (Holm-Sidak method):  
Overall significance level = 0.05

Comparisons for factor:

| Comparison      | Diff of Means | t     | Unadjusted P | Critical Level | Significant? |
|-----------------|---------------|-------|--------------|----------------|--------------|
| 34mon vs. 4mon  | 239.787       | 4.112 | 0.001        | 0.009          | Yes          |
| 34mon vs. 12mon | 175.766       | 3.178 | 0.007        | 0.010          | Yes          |
| 24mon vs. 4mon  | 153.353       | 2.772 | 0.015        | 0.013          | Yes          |
| 24mon vs. 12mon | 89.332        | 1.713 | 0.109        | 0.017          | No           |
| 34mon vs. 24mon | 86.434        | 1.563 | 0.140        | 0.025          | No           |
| 12mon vs. 4mon  | 64.021        | 1.157 | 0.266        | 0.050          | No           |

## One Way Analysis of Variance

Data source: SSP#5814

Normality Test: Failed (P = 0.017)

Equal Variance Test: Passed (P = 0.303)

| Group Name | N | Missing | Mean    | Std Dev | SEM    |
|------------|---|---------|---------|---------|--------|
| 4mon       | 4 | 0       | 8.078   | 5.918   | 2.959  |
| 12mon      | 5 | 0       | 38.226  | 35.437  | 15.848 |
| 24mon      | 5 | 0       | 79.954  | 73.101  | 32.692 |
| 34mon      | 4 | 0       | 117.890 | 59.624  | 29.812 |

| Source of Variation | DF | SS        | MS       | F     | P     |
|---------------------|----|-----------|----------|-------|-------|
| Between Groups      | 3  | 28538.019 | 9512.673 | 3.583 | 0.041 |
| Residual            | 14 | 37168.320 | 2654.880 |       |       |
| Total               | 17 | 65706.338 |          |       |       |

The differences in the mean values among the treatment groups are greater than would be expected by chance; there is a statistically significant difference (P = 0.041).

Power of performed test with alpha = 0.050: 0.505

The power of the performed test (0.505) is below the desired power of 0.800. You should interpret the negative findings cautiously.

All Pairwise Multiple Comparison Procedures (Holm-Sidak method):  
Overall significance level = 0.05

Comparisons for factor:

| Comparison      | Diff of Means | t     | Unadjusted P | Critical Level | Significant? |
|-----------------|---------------|-------|--------------|----------------|--------------|
| 34mon vs. 4mon  | 109.813       | 3.014 | 0.009        | 0.009          | Yes          |
| 34mon vs. 12mon | 79.664        | 2.305 | 0.037        | 0.010          | Yes          |
| 24mon vs. 4mon  | 71.876        | 2.079 | 0.056        | 0.013          | No           |
| 24mon vs. 12mon | 41.728        | 1.280 | 0.221        | 0.017          | No           |
| 34mon vs. 24mon | 37.936        | 1.098 | 0.291        | 0.025          | No           |
| 12mon vs. 4mon  | 30.148        | 0.872 | 0.398        | 0.050          | No           |

## One Way Analysis of Variance

Data source: SSP#5817

Normality Test: Passed (P > 0.050)

Equal Variance Test: Passed (P = 0.638)

| Group Name | N | Missing | Mean     | Std Dev | SEM     |
|------------|---|---------|----------|---------|---------|
| 4mon       | 4 | 0       | 387.673  | 284.829 | 142.414 |
| 12mon      | 5 | 0       | 688.414  | 375.804 | 168.065 |
| 24mon      | 5 | 0       | 1078.974 | 437.309 | 195.571 |
| 34mon      | 4 | 0       | 1558.560 | 299.145 | 149.573 |

| Source of Variation | DF | SS          | MS          | F     | P     |
|---------------------|----|-------------|-------------|-------|-------|
| Between Groups      | 3  | 3158837.143 | 1052945.714 | 8.004 | 0.002 |
| Residual            | 14 | 1841718.263 | 131551.305  |       |       |
| Total               | 17 | 5000555.406 |             |       |       |

The differences in the mean values among the treatment groups are greater than would be expected by chance; there is a statistically significant difference (P = 0.002).

Power of performed test with alpha = 0.050: 0.936

All Pairwise Multiple Comparison Procedures (Holm-Sidak method):  
Overall significance level = 0.05

Comparisons for factor:

| Comparison      | Diff of Means | t     | Unadjusted P | Critical Level | Significant? |
|-----------------|---------------|-------|--------------|----------------|--------------|
| 34mon vs. 4mon  | 1170.888      | 4.565 | <0.001       | 0.009          | Yes          |
| 34mon vs. 12mon | 870.146       | 3.576 | 0.003        | 0.010          | Yes          |
| 24mon vs. 4mon  | 691.301       | 2.841 | 0.013        | 0.013          | Yes          |
| 34mon vs. 24mon | 479.586       | 1.971 | 0.069        | 0.017          | No           |
| 24mon vs. 12mon | 390.560       | 1.703 | 0.111        | 0.025          | No           |
| 12mon vs. 4mon  | 300.741       | 1.236 | 0.237        | 0.050          | No           |

## One Way Analysis of Variance

Data source: SSP#6010

Normality Test: Passed (P > 0.050)

Equal Variance Test: Passed (P = 0.292)

| Group Name | N | Missing | Mean     | Std Dev | SEM    |
|------------|---|---------|----------|---------|--------|
| 4mon       | 4 | 0       | 668.250  | 81.285  | 40.642 |
| 12mon      | 5 | 0       | 714.690  | 207.196 | 92.661 |
| 24mon      | 5 | 0       | 1108.548 | 221.943 | 99.256 |
| 34mon      | 4 | 0       | 1063.500 | 173.644 | 86.822 |

| Source of Variation | DF | SS          | MS         | F     | P     |
|---------------------|----|-------------|------------|-------|-------|
| Between Groups      | 3  | 709555.496  | 236518.499 | 6.912 | 0.004 |
| Residual            | 14 | 479033.459  | 34216.676  |       |       |
| Total               | 17 | 1188588.954 |            |       |       |

The differences in the mean values among the treatment groups are greater than would be expected by chance; there is a statistically significant difference (P = 0.004).

Power of performed test with alpha = 0.050: 0.886

All Pairwise Multiple Comparison Procedures (Holm-Sidak method):  
Overall significance level = 0.05

Comparisons for factor:

| Comparison      | Diff of Means | t     | Unadjusted P | Critical Level | Significant? |
|-----------------|---------------|-------|--------------|----------------|--------------|
| 24mon vs. 4mon  | 440.298       | 3.548 | 0.003        | 0.009          | Yes          |
| 24mon vs. 12mon | 393.858       | 3.367 | 0.005        | 0.010          | Yes          |
| 34mon vs. 4mon  | 395.250       | 3.022 | 0.009        | 0.013          | Yes          |
| 34mon vs. 12mon | 348.810       | 2.811 | 0.014        | 0.017          | Yes          |
| 12mon vs. 4mon  | 46.440        | 0.374 | 0.714        | 0.025          | No           |
| 24mon vs. 34mon | 45.048        | 0.363 | 0.722        | 0.050          | No           |



## One Way Analysis of Variance

Data source: SSP#6110

Normality Test: Passed (P > 0.050)

Equal Variance Test: Passed (P = 0.423)

| Group Name | N | Missing | Mean     | Std Dev | SEM     |
|------------|---|---------|----------|---------|---------|
| 4mon       | 4 | 0       | 1075.530 | 102.558 | 51.279  |
| 12mon      | 5 | 0       | 1134.606 | 99.724  | 44.598  |
| 24mon      | 5 | 0       | 1568.450 | 183.059 | 81.867  |
| 34mon      | 4 | 0       | 1700.460 | 385.971 | 192.985 |

| Source of Variation | DF | SS          | MS         | F     | P     |
|---------------------|----|-------------|------------|-------|-------|
| Between Groups      | 3  | 1257536.960 | 419178.987 | 8.997 | 0.001 |
| Residual            | 14 | 652297.040  | 46592.646  |       |       |
| Total               | 17 | 1909833.999 |            |       |       |

The differences in the mean values among the treatment groups are greater than would be expected by chance; there is a statistically significant difference (P = 0.001).

Power of performed test with alpha = 0.050: 0.964

All Pairwise Multiple Comparison Procedures (Holm-Sidak method):  
Overall significance level = 0.05

Comparisons for factor:

| Comparison      | Diff of Means | t     | Unadjusted P | Critical Level | Significant? |
|-----------------|---------------|-------|--------------|----------------|--------------|
| 34mon vs. 4mon  | 624.930       | 4.094 | 0.001        | 0.009          | Yes          |
| 34mon vs. 12mon | 565.854       | 3.908 | 0.002        | 0.010          | Yes          |
| 24mon vs. 4mon  | 492.920       | 3.404 | 0.004        | 0.013          | Yes          |
| 24mon vs. 12mon | 433.844       | 3.178 | 0.007        | 0.017          | Yes          |
| 34mon vs. 24mon | 132.010       | 0.912 | 0.377        | 0.025          | No           |
| 12mon vs. 4mon  | 59.076        | 0.408 | 0.689        | 0.050          | No           |

## One Way Analysis of Variance

Data source: SSP#6308

Normality Test: Failed (P = 0.050)

Equal Variance Test: Passed (P = 0.305)

| Group Name | N | Missing | Mean    | Std Dev | SEM    |
|------------|---|---------|---------|---------|--------|
| 4mon       | 4 | 0       | 122.968 | 24.969  | 12.485 |
| 12mon      | 5 | 0       | 272.724 | 12.004  | 5.368  |
| 24mon      | 5 | 0       | 341.312 | 87.424  | 39.097 |
| 34mon      | 4 | 0       | 371.008 | 129.886 | 64.943 |

| Source of Variation | DF | SS         | MS        | F     | P     |
|---------------------|----|------------|-----------|-------|-------|
| Between Groups      | 3  | 150824.738 | 50274.913 | 8.416 | 0.002 |
| Residual            | 14 | 83629.472  | 5973.534  |       |       |
| Total               | 17 | 234454.211 |           |       |       |

The differences in the mean values among the treatment groups are greater than would be expected by chance; there is a statistically significant difference (P = 0.002).

Power of performed test with alpha = 0.050: 0.949

All Pairwise Multiple Comparison Procedures (Holm-Sidak method):  
Overall significance level = 0.05

Comparisons for factor:

| Comparison      | Diff of Means | t     | Unadjusted P | Critical Level | Significant? |
|-----------------|---------------|-------|--------------|----------------|--------------|
| 34mon vs. 4mon  | 248.040       | 4.539 | <0.001       | 0.009          | Yes          |
| 24mon vs. 4mon  | 218.345       | 4.211 | <0.001       | 0.010          | Yes          |
| 12mon vs. 4mon  | 149.756       | 2.888 | 0.012        | 0.013          | Yes          |
| 34mon vs. 12mon | 98.284        | 1.896 | 0.079        | 0.017          | No           |
| 24mon vs. 12mon | 68.588        | 1.403 | 0.182        | 0.025          | No           |
| 34mon vs. 24mon | 29.696        | 0.573 | 0.576        | 0.050          | No           |

## One Way Repeated Measures Analysis of Variance

Data source: SSP#6419

Normality Test: Passed (P > 0.050)

Equal Variance Test: Failed (P = 0.033)

| Treatment Name | N | Missing | Mean    | Std Dev | SEM    |
|----------------|---|---------|---------|---------|--------|
| 4mon           | 4 | 0       | 103.635 | 19.981  | 9.991  |
| 12mon          | 5 | 0       | 184.624 | 64.498  | 28.844 |
| 24mon          | 5 | 0       | 148.586 | 15.582  | 6.968  |
| 34mon          | 4 | 0       | 161.093 | 35.041  | 17.521 |

| Source of Variation | DF | SS        | MS       | F     | P     |
|---------------------|----|-----------|----------|-------|-------|
| Between Subjects    | 4  | 10062.414 | 2515.604 |       |       |
| Between Treatments  | 3  | 13833.707 | 4611.236 | 3.710 | 0.050 |
| Residual            | 10 | 12430.007 | 1243.001 |       |       |
| Total               | 17 | 37552.941 | 2208.997 |       |       |

The differences in the mean values among the treatment groups are greater than would be expected by chance; there is a statistically significant difference (P = 0.050). To isolate the group or groups that differ from the others use a multiple comparison procedure.

Power of performed test with alpha = 0.050: 0.480

The power of the performed test (0.480) is below the desired power of 0.800. You should interpret the negative findings cautiously.

Expected Mean Squares:

Approximate DF Residual = 10.000

Expected MS(Subj) = var(res) + 3.500 var(Subj)

Expected MS(Treatment) = var(res) + var(Treatment)

Expected MS(Residual) = var(res)

All Pairwise Multiple Comparison Procedures (Holm-Sidak method):

Overall significance level = 0.05

Comparisons for factor:

| Comparison      | Diff of Means | t     | Unadjusted P | Critical Level | Significant? |
|-----------------|---------------|-------|--------------|----------------|--------------|
| 12mon vs. 4mon  | 78.308        | 3.223 | 0.009        | 0.009          | Yes          |
| 34mon vs. 4mon  | 57.457        | 2.198 | 0.053        | 0.010          | No           |
| 24mon vs. 4mon  | 42.270        | 1.740 | 0.113        | 0.013          | No           |
| 12mon vs. 24mon | 36.038        | 1.616 | 0.137        | 0.017          | No           |
| 12mon vs. 34mon | 20.850        | 0.858 | 0.411        | 0.025          | No           |
| 34mon vs. 24mon | 15.188        | 0.625 | 0.546        | 0.050          | No           |

## One Way Analysis of Variance

Data source: SSP#6716

Normality Test: Passed (P > 0.050)

Equal Variance Test: Passed (P = 0.423)

| Group Name | N | Missing | Mean    | Std Dev | SEM    |
|------------|---|---------|---------|---------|--------|
| 4m         | 4 | 0       | 159.332 | 83.214  | 41.607 |
| 12m        | 5 | 0       | 247.224 | 188.715 | 84.396 |
| 24m        | 5 | 0       | 444.696 | 92.221  | 41.242 |
| 34m        | 4 | 0       | 468.575 | 199.281 | 99.640 |

| Source of Variation | DF | SS         | MS        | F     | P     |
|---------------------|----|------------|-----------|-------|-------|
| Between Groups      | 3  | 293302.714 | 97767.571 | 4.326 | 0.023 |
| Residual            | 14 | 316384.908 | 22598.922 |       |       |
| Total               | 17 | 609687.622 |           |       |       |

The differences in the mean values among the treatment groups are greater than would be expected by chance; there is a statistically significant difference (P = 0.023).

Power of performed test with alpha = 0.050: 0.625

The power of the performed test (0.625) is below the desired power of 0.800. You should interpret the negative findings cautiously.

All Pairwise Multiple Comparison Procedures (Holm-Sidak method):  
Overall significance level = 0.05

Comparisons for factor:

| Comparison  | Diff of Means | t     | Unadjusted P | Critical Level | Significant? |
|-------------|---------------|-------|--------------|----------------|--------------|
| 34m vs. 4m  | 309.243       | 2.909 | 0.011        | 0.009          | Yes          |
| 24m vs. 4m  | 285.364       | 2.830 | 0.013        | 0.010          | Yes          |
| 34m vs. 12m | 221.351       | 2.195 | 0.046        | 0.013          | Yes          |
| 24m vs. 12m | 197.472       | 2.077 | 0.057        | 0.017          | No           |
| 12m vs. 4m  | 87.892        | 0.872 | 0.398        | 0.025          | No           |
| 34m vs. 24m | 23.879        | 0.237 | 0.816        | 0.050          | No           |

## One Way Analysis of Variance

Data source: SSP#6803

Normality Test: Failed (P = 0.047)

Test execution ended by user request, ANOVA on Ranks begun

## Kruskal-Wallis One Way Analysis of Variance on Ranks

Data source: Data 81 in NIAset1

| Group | N | Missing | Median  | 25%     | 75%     |
|-------|---|---------|---------|---------|---------|
| 4m    | 4 | 0       | 50.315  | 47.260  | 70.715  |
| 12m   | 5 | 0       | 111.880 | 88.648  | 202.290 |
| 24m   | 5 | 0       | 198.770 | 115.720 | 310.973 |
| 34m   | 4 | 0       | 257.975 | 234.145 | 310.050 |

H = 11.881 with 3 degrees of freedom. (P = 0.008)

The differences in the median values among the treatment groups are greater than would be expected by chance; there is a statistically significant difference (P = 0.008)

To isolate the group or groups that differ from the others use a multiple comparison procedure.

All Pairwise Multiple Comparison Procedures (Dunn's Method) :

| Comparison | Diff of Ranks | Q     | P<0.05      |
|------------|---------------|-------|-------------|
| 34m vs 4m  | 12.500        | 3.311 | Yes         |
| 34m vs 12m | 6.850         | 1.913 | No          |
| 34m vs 24m | 3.850         | 1.075 | Do Not Test |
| 24m vs 4m  | 8.650         | 2.415 | No          |
| 24m vs 12m | 3.000         | 0.889 | Do Not Test |
| 12m vs 4m  | 5.650         | 1.578 | Do Not Test |

Note: The multiple comparisons on ranks do not include an adjustment for ties.

## One Way Analysis of Variance

Data source: SSP#7507

Normality Test: Passed (P > 0.050)

Equal Variance Test: Passed (P = 0.155)

| Group Name | N | Missing | Mean     | Std Dev  | SEM     |
|------------|---|---------|----------|----------|---------|
| 4mon       | 4 | 0       | 6930.810 | 640.288  | 320.144 |
| 12mon      | 5 | 0       | 7318.894 | 747.474  | 334.280 |
| 24mon      | 5 | 0       | 5365.778 | 1599.214 | 715.190 |
| 34mon      | 4 | 0       | 4821.708 | 713.138  | 356.569 |

| Source of Variation | DF | SS           | MS          | F     | P     |
|---------------------|----|--------------|-------------|-------|-------|
| Between Groups      | 3  | 19398739.776 | 6466246.592 | 5.948 | 0.008 |
| Residual            | 14 | 15220407.067 | 1087171.933 |       |       |
| Total               | 17 | 34619146.842 |             |       |       |

The differences in the mean values among the treatment groups are greater than would be expected by chance; there is a statistically significant difference (P = 0.008).

Power of performed test with alpha = 0.050: 0.816

All Pairwise Multiple Comparison Procedures (Holm-Sidak method):  
Overall significance level = 0.05

Comparisons for factor:

| Comparison      | Diff of Means | t     | Unadjusted P | Critical Level | Significant? |
|-----------------|---------------|-------|--------------|----------------|--------------|
| 12mon vs. 34mon | 2497.186      | 3.570 | 0.003        | 0.009          | Yes          |
| 12mon vs. 24mon | 1953.116      | 2.962 | 0.010        | 0.010          | Yes          |
| 4mon vs. 34mon  | 2109.102      | 2.861 | 0.013        | 0.013          | Yes          |
| 4mon vs. 24mon  | 1565.032      | 2.238 | 0.042        | 0.017          | Yes          |
| 24mon vs. 34mon | 544.070       | 0.778 | 0.450        | 0.025          | No           |
| 12mon vs. 4mon  | 388.084       | 0.555 | 0.588        | 0.050          | No           |

## One Way Analysis of Variance

Data source: SSP#8013

Normality Test: Failed (P = 0.007)

Equal Variance Test: Passed (P = 0.429)

| Group Name | N | Missing | Mean     | Std Dev | SEM     |
|------------|---|---------|----------|---------|---------|
| 4mon       | 4 | 0       | 1483.918 | 641.622 | 320.811 |
| 12mon      | 5 | 0       | 399.256  | 38.676  | 17.296  |
| 24mon      | 5 | 0       | 1426.730 | 313.616 | 140.253 |
| 34mon      | 4 | 0       | 688.010  | 585.236 | 292.618 |

| Source of Variation | DF | SS          | MS          | F     | P     |
|---------------------|----|-------------|-------------|-------|-------|
| Between Groups      | 3  | 4039167.350 | 1346389.117 | 7.081 | 0.004 |
| Residual            | 14 | 2661941.913 | 190138.708  |       |       |
| Total               | 17 | 6701109.263 |             |       |       |

The differences in the mean values among the treatment groups are greater than would be expected by chance; there is a statistically significant difference (P = 0.004).

Power of performed test with alpha = 0.050: 0.895

All Pairwise Multiple Comparison Procedures (Holm-Sidak method):  
Overall significance level = 0.05

Comparisons for factor:

| Comparison      | Diff of Means | t     | Unadjusted P | Critical Level | Significant? |
|-----------------|---------------|-------|--------------|----------------|--------------|
| 24mon vs. 12mon | 1027.474      | 3.726 | 0.002        | 0.009          | Yes          |
| 4mon vs. 12mon  | 1084.662      | 3.708 | 0.002        | 0.010          | Yes          |
| 4mon vs. 34mon  | 795.908       | 2.581 | 0.022        | 0.013          | Yes          |
| 24mon vs. 34mon | 738.720       | 2.525 | 0.024        | 0.017          | Yes          |
| 34mon vs. 12mon | 288.754       | 0.987 | 0.340        | 0.025          | No           |
| 4mon vs. 24mon  | 57.188        | 0.196 | 0.848        | 0.050          | No           |

## One Way Repeated Measures Analysis of Variance

Data source: SSP#8025

Normality Test: Passed (P > 0.050)

Equal Variance Test: Passed (P = 0.334)

| Treatment Name | N | Missing | Mean     | Std Dev | SEM     |
|----------------|---|---------|----------|---------|---------|
| 4mon           | 4 | 0       | 1321.045 | 554.961 | 277.481 |
| 12mon          | 5 | 0       | 1124.510 | 740.750 | 331.273 |
| 24mon          | 5 | 0       | 466.218  | 929.560 | 415.712 |
| 34mon          | 4 | 0       | 244.055  | 244.658 | 122.329 |

| Source of Variation | DF | SS           | MS          | F     | P     |
|---------------------|----|--------------|-------------|-------|-------|
| Between Subjects    | 4  | 3822863.761  | 955715.940  |       |       |
| Between Treatments  | 3  | 3519459.993  | 1173153.331 | 4.001 | 0.041 |
| Residual            | 10 | 2931822.816  | 293182.282  |       |       |
| Total               | 17 | 10158602.162 | 597564.833  |       |       |

The differences in the mean values among the treatment groups are greater than would be expected by chance; there is a statistically significant difference (P = 0.041). To isolate the group or groups that differ from the others use a multiple comparison procedure.

Power of performed test with alpha = 0.050: 0.525

The power of the performed test (0.525) is below the desired power of 0.800. You should interpret the negative findings cautiously.

Expected Mean Squares:

Approximate DF Residual = 10.000

Expected MS(Subj) = var(res) + 3.500 var(Subj)

Expected MS(Treatment) = var(res) + var(Treatment)

Expected MS(Residual) = var(res)

All Pairwise Multiple Comparison Procedures (Holm-Sidak method):

Overall significance level = 0.05

Comparisons for factor:

| Comparison      | Diff of Means | t     | Unadjusted P | Critical Level | Significant? |
|-----------------|---------------|-------|--------------|----------------|--------------|
| 12mon vs. 34mon | 1038.136      | 2.782 | 0.019        | 0.009          | Yes          |
| 4mon vs. 34mon  | 1076.990      | 2.682 | 0.023        | 0.010          | Yes          |
| 12mon vs. 24mon | 658.292       | 1.922 | 0.083        | 0.013          | No           |
| 4mon vs. 24mon  | 697.146       | 1.868 | 0.091        | 0.017          | No           |
| 24mon vs. 34mon | 379.844       | 1.018 | 0.333        | 0.025          | No           |
| 4mon vs. 12mon  | 38.854        | 0.104 | 0.919        | 0.050          | No           |



**Sigma Stat statistical analysis results corresponding to Table 2 of Richardson et al.**

**One Way Analysis of Variance**

**Data source:** SSP#4312

**Normality Test:** Passed (P > 0.050)

**Equal Variance Test:** Passed (P = 0.068)

| <b>Group Name</b> | <b>N</b> | <b>Missing</b> | <b>Mean</b> | <b>Std Dev</b> | <b>SEM</b> |
|-------------------|----------|----------------|-------------|----------------|------------|
| 4mon              | 3        | 0              | 0.550       | 0.252          | 0.146      |
| 12mon             | 3        | 0              | 1.407       | 0.616          | 0.356      |
| 24mon             | 3        | 0              | 3.890       | 1.509          | 0.871      |
| 34mon             | 3        | 0              | 3.547       | 2.146          | 1.239      |

| <b>Source of Variation</b> | <b>DF</b> | <b>SS</b> | <b>MS</b> | <b>F</b> | <b>P</b> |
|----------------------------|-----------|-----------|-----------|----------|----------|
| Between Groups             | 3         | 23.800    | 7.933     | 4.332    | 0.043    |
| Residual                   | 8         | 14.650    | 1.831     |          |          |
| Total                      | 11        | 38.451    |           |          |          |

The differences in the mean values among the treatment groups are greater than would be expected by chance; there is a statistically significant difference (P = 0.043).

Power of performed test with alpha = 0.050: 0.530

The power of the performed test (0.530) is below the desired power of 0.800. You should interpret the negative findings cautiously.

All Pairwise Multiple Comparison Procedures (Holm-Sidak method):  
Overall significance level = 0.05

Comparisons for factor:

| <b>Comparison</b> | <b>Diff of Means</b> | <b>t</b> | <b>Unadjusted P</b> | <b>Critical Level</b> | <b>Significant?</b> |
|-------------------|----------------------|----------|---------------------|-----------------------|---------------------|
| 24mon vs. 4mon    | 3.340                | 3.023    | 0.016               | 0.009                 | Yes                 |
| 34mon vs. 4mon    | 2.997                | 2.712    | 0.027               | 0.010                 | Yes                 |
| 24mon vs. 12mon   | 2.483                | 2.248    | 0.055               | 0.013                 | No                  |
| 34mon vs. 12mon   | 2.140                | 1.937    | 0.089               | 0.017                 | No                  |
| 12mon vs. 4mon    | 0.857                | 0.775    | 0.460               | 0.025                 | No                  |
| 24mon vs. 34mon   | 0.343                | 0.311    | 0.764               | 0.050                 | No                  |

## One Way Analysis of Variance

Data source: SSP#3006

Normality Test: Failed (P = 0.013)

Equal Variance Test: Passed (P = 0.425)

| Group Name | N | Missing | Mean   | Std Dev | SEM   |
|------------|---|---------|--------|---------|-------|
| 4mon       | 3 | 0       | 0.867  | 1.090   | 0.629 |
| 12mon      | 3 | 0       | 1.100  | 0.989   | 0.571 |
| 24mon      | 3 | 0       | 9.617  | 8.331   | 4.810 |
| 34mon      | 3 | 0       | 16.917 | 8.169   | 4.716 |

| Source of Variation | DF | SS      | MS      | F     | P     |
|---------------------|----|---------|---------|-------|-------|
| Between Groups      | 3  | 532.658 | 177.553 | 5.135 | 0.029 |
| Residual            | 8  | 276.596 | 34.575  |       |       |
| Total               | 11 | 809.254 |         |       |       |

The differences in the mean values among the treatment groups are greater than would be expected by chance; there is a statistically significant difference (P = 0.029).

Power of performed test with alpha = 0.050: 0.631

The power of the performed test (0.631) is below the desired power of 0.800. You should interpret the negative findings cautiously.

All Pairwise Multiple Comparison Procedures (Holm-Sidak method):  
Overall significance level = 0.05

Comparisons for factor:

| Comparison      | Diff of Means | t      | Unadjusted P | Critical Level | Significant? |
|-----------------|---------------|--------|--------------|----------------|--------------|
| 34mon vs. 4mon  | 16.050        | 3.343  | 0.010        | 0.009          | Yes          |
| 34mon vs. 12mon | 15.817        | 3.294  | 0.011        | 0.010          | Yes          |
| 24mon vs. 4mon  | 8.750         | 1.823  | 0.106        | 0.013          | No           |
| 24mon vs. 12mon | 8.517         | 1.774  | 0.114        | 0.017          | No           |
| 34mon vs. 24mon | 7.300         | 1.521  | 0.167        | 0.025          | No           |
| 12mon vs. 4mon  | 0.233         | 0.0486 | 0.962        | 0.050          | No           |

## One Way Analysis of Variance

Data source: SSP#2503

Normality Test: Passed (P > 0.050)

Equal Variance Test: Passed (P = 0.893)

| Group Name | N | Missing | Mean  | Std Dev | SEM   |
|------------|---|---------|-------|---------|-------|
| 4mon       | 3 | 0       | 1.663 | 1.530   | 0.883 |
| 12mon      | 3 | 0       | 6.193 | 2.212   | 1.277 |
| 24mon      | 3 | 0       | 6.150 | 1.329   | 0.767 |
| 34mon      | 3 | 0       | 4.123 | 1.172   | 0.676 |

| Source of Variation | DF | SS     | MS     | F     | P     |
|---------------------|----|--------|--------|-------|-------|
| Between Groups      | 3  | 41.323 | 13.774 | 5.313 | 0.026 |
| Residual            | 8  | 20.740 | 2.593  |       |       |
| Total               | 11 | 62.063 |        |       |       |

The differences in the mean values among the treatment groups are greater than would be expected by chance; there is a statistically significant difference (P = 0.026).

Power of performed test with alpha = 0.050: 0.651

The power of the performed test (0.651) is below the desired power of 0.800. You should interpret the negative findings cautiously.

All Pairwise Multiple Comparison Procedures (Holm-Sidak method):  
Overall significance level = 0.05

Comparisons for factor:

| Comparison      | Diff of Means | t      | Unadjusted P | Critical Level | Significant? |
|-----------------|---------------|--------|--------------|----------------|--------------|
| 12mon vs. 4mon  | 4.530         | 3.446  | 0.009        | 0.009          | Yes          |
| 24mon vs. 4mon  | 4.487         | 3.413  | 0.009        | 0.010          | Yes          |
| 34mon vs. 4mon  | 2.460         | 1.871  | 0.098        | 0.013          | No           |
| 12mon vs. 34mon | 2.070         | 1.575  | 0.154        | 0.017          | No           |
| 24mon vs. 34mon | 2.027         | 1.542  | 0.162        | 0.025          | No           |
| 12mon vs. 24mon | 0.0433        | 0.0330 | 0.975        | 0.050          | No           |

## One Way Analysis of Variance

Data source: SSP#6314

Normality Test: Passed (P > 0.050)

Equal Variance Test: Passed (P = 0.498)

| Group Name | N | Missing | Mean   | Std Dev | SEM   |
|------------|---|---------|--------|---------|-------|
| 4mon       | 3 | 0       | 0.280  | 0.485   | 0.280 |
| 12mon      | 3 | 0       | 3.187  | 3.040   | 1.755 |
| 24mon      | 3 | 0       | 5.033  | 0.929   | 0.536 |
| 34mon      | 3 | 0       | 11.553 | 3.517   | 2.031 |

| Source of Variation | DF | SS      | MS     | F      | P     |
|---------------------|----|---------|--------|--------|-------|
| Between Groups      | 3  | 205.539 | 68.513 | 12.067 | 0.002 |
| Residual            | 8  | 45.420  | 5.678  |        |       |
| Total               | 11 | 250.960 |        |        |       |

The differences in the mean values among the treatment groups are greater than would be expected by chance; there is a statistically significant difference (P = 0.002).

Power of performed test with alpha = 0.050: 0.975

All Pairwise Multiple Comparison Procedures (Holm-Sidak method):  
Overall significance level = 0.05

Comparisons for factor:

| Comparison      | Diff of Means | t     | Unadjusted P | Critical Level | Significant? |
|-----------------|---------------|-------|--------------|----------------|--------------|
| 34mon vs. 4mon  | 11.273        | 5.795 | <0.001       | 0.009          | Yes          |
| 34mon vs. 12mon | 8.367         | 4.300 | 0.003        | 0.010          | Yes          |
| 34mon vs. 24mon | 6.520         | 3.351 | 0.010        | 0.013          | Yes          |
| 24mon vs. 4mon  | 4.753         | 2.443 | 0.040        | 0.017          | Yes          |
| 12mon vs. 4mon  | 2.907         | 1.494 | 0.174        | 0.025          | No           |
| 24mon vs. 12mon | 1.847         | 0.949 | 0.370        | 0.050          | No           |

## One Way Analysis of Variance

Data source: SSP#2303

Normality Test: Passed (P > 0.050)

Equal Variance Test: Passed (P = 0.593)

| Group Name | N | Missing | Mean   | Std Dev | SEM    |
|------------|---|---------|--------|---------|--------|
| 4mon       | 3 | 0       | 0.0300 | 0.0520  | 0.0300 |
| 12mon      | 3 | 0       | 1.233  | 2.136   | 1.233  |
| 24mon      | 3 | 0       | 3.987  | 1.671   | 0.965  |
| 34mon      | 3 | 0       | 1.057  | 0.917   | 0.530  |

| Source of Variation | DF | SS     | MS    | F     | P     |
|---------------------|----|--------|-------|-------|-------|
| Between Groups      | 3  | 25.766 | 8.589 | 4.190 | 0.047 |
| Residual            | 8  | 16.397 | 2.050 |       |       |
| Total               | 11 | 42.163 |       |       |       |

The differences in the mean values among the treatment groups are greater than would be expected by chance; there is a statistically significant difference (P = 0.047).

Power of performed test with alpha = 0.050: 0.510

The power of the performed test (0.510) is below the desired power of 0.800. You should interpret the negative findings cautiously.

All Pairwise Multiple Comparison Procedures (Holm-Sidak method):  
Overall significance level = 0.05

Comparisons for factor:

| Comparison      | Diff of Means | t     | Unadjusted P | Critical Level | Significant? |
|-----------------|---------------|-------|--------------|----------------|--------------|
| 24mon vs. 4mon  | 3.957         | 3.385 | 0.010        | 0.009          | Yes          |
| 24mon vs. 34mon | 2.930         | 2.507 | 0.037        | 0.010          | Yes          |
| 24mon vs. 12mon | 2.753         | 2.355 | 0.046        | 0.013          | Yes          |
| 12mon vs. 4mon  | 1.203         | 1.029 | 0.333        | 0.017          | No           |
| 34mon vs. 4mon  | 1.027         | 0.878 | 0.405        | 0.025          | No           |
| 12mon vs. 34mon | 0.177         | 0.151 | 0.884        | 0.050          | No           |

## One Way Analysis of Variance

Data source: SSP#6209

Normality Test: Passed (P > 0.050)

Equal Variance Test: Passed (P = 0.557)

| Group Name | N | Missing | Mean  | Std Dev | SEM   |
|------------|---|---------|-------|---------|-------|
| 4mon       | 3 | 0       | 0.543 | 0.480   | 0.277 |
| 12mon      | 3 | 0       | 0.730 | 0.380   | 0.220 |
| 24mon      | 3 | 0       | 4.697 | 0.878   | 0.507 |
| 34mon      | 3 | 0       | 2.637 | 1.910   | 1.103 |

| Source of Variation | DF | SS     | MS     | F     | P     |
|---------------------|----|--------|--------|-------|-------|
| Between Groups      | 3  | 33.960 | 11.320 | 9.444 | 0.005 |
| Residual            | 8  | 9.590  | 1.199  |       |       |
| Total               | 11 | 43.550 |        |       |       |

The differences in the mean values among the treatment groups are greater than would be expected by chance; there is a statistically significant difference (P = 0.005).

Power of performed test with alpha = 0.050: 0.924

All Pairwise Multiple Comparison Procedures (Holm-Sidak method):

Overall significance level = 0.05

Comparisons for factor:

| Comparison      | Diff of Means | t     | Unadjusted P | Critical Level | Significant? |
|-----------------|---------------|-------|--------------|----------------|--------------|
| 24mon vs. 4mon  | 4.153         | 4.646 | 0.002        | 0.009          | Yes          |
| 24mon vs. 12mon | 3.967         | 4.437 | 0.002        | 0.010          | Yes          |
| 34mon vs. 4mon  | 2.093         | 2.342 | 0.047        | 0.013          | Yes          |
| 24mon vs. 34mon | 2.060         | 2.304 | 0.050        | 0.017          | No           |
| 34mon vs. 12mon | 1.907         | 2.133 | 0.065        | 0.025          | No           |
| 12mon vs. 4mon  | 0.187         | 0.209 | 0.840        | 0.050          | No           |

## One Way Analysis of Variance

Data source: SSP#3411

Normality Test: Failed (P = 0.026)

Equal Variance Test: Passed (P = 0.988)

| Group Name | N | Missing | Mean  | Std Dev | SEM   |
|------------|---|---------|-------|---------|-------|
| 4mon       | 3 | 0       | 0.000 | 0.000   | 0.000 |
| 12mon      | 3 | 0       | 0.000 | 0.000   | 0.000 |
| 24mon      | 3 | 0       | 1.613 | 0.644   | 0.372 |
| 34mon      | 3 | 0       | 0.560 | 0.662   | 0.382 |

| Source of Variation | DF | SS    | MS    | F     | P     |
|---------------------|----|-------|-------|-------|-------|
| Between Groups      | 3  | 5.207 | 1.736 | 8.139 | 0.008 |
| Residual            | 8  | 1.706 | 0.213 |       |       |
| Total               | 11 | 6.913 |       |       |       |

The differences in the mean values among the treatment groups are greater than would be expected by chance; there is a statistically significant difference (P = 0.008).

Power of performed test with alpha = 0.050: 0.872

All Pairwise Multiple Comparison Procedures (Holm-Sidak method):  
Overall significance level = 0.05

Comparisons for factor:

| Comparison      | Diff of Means | t     | Unadjusted P | Critical Level | Significant? |
|-----------------|---------------|-------|--------------|----------------|--------------|
| 24mon vs. 12mon | 1.613         | 4.279 | 0.003        | 0.009          | Yes          |
| 24mon vs. 4mon  | 1.613         | 4.279 | 0.003        | 0.010          | Yes          |
| 24mon vs. 34mon | 1.053         | 2.794 | 0.023        | 0.013          | Yes          |
| 34mon vs. 12mon | 0.560         | 1.485 | 0.176        | 0.017          | No           |
| 34mon vs. 4mon  | 0.560         | 1.485 | 0.176        | 0.025          | No           |
| 4mon vs. 12mon  | 0.000         | 0.000 | 1.000        | 0.050          | No           |
